# Supplementary material for: Transcription Factor Activities Enhance Markers of Drug Sensitivity in Cancer
Source: Oxford University Press journal article supplement (doi:10.1158/0008-5472.can-17-1679), 2017-12-11
Supplement: 00085472can171679-sup-184371_2_supp_4394324_p06tyd.xlsx [file 00085472can171679-sup-184371_2_supp_4394324_p06tyd.xlsx]

## Sheet: table 1A
Table S1A. Cell lines
Cell.line.name	CosmicID	newly_sequenced_GDSC	from_CCLE	from_Genentech	gdsc_desc_1	gdsc_desc_2	Study.Abbreviation	MMR	Screen_Medium
201T	1287381	TRUE	FALSE	FALSE	lung_NSCLC	lung_NSCLC_adenocarcinoma	LUAD	MSS/MSI-L	R
22RV1	924100	FALSE	TRUE	FALSE	urogenital_system	prostate	PRAD	MSI-H	R
23132-87	910924	FALSE	TRUE	TRUE	digestive_system	stomach	STAD	MSI-H	R
42-MG-BA	687561	FALSE	TRUE	FALSE	nervous_system	glioma	GBM	MSS/MSI-L	R
451Lu	1287706	TRUE	FALSE	FALSE	skin	melanoma	SKCM	MSS/MSI-L	D/F12
5637	687452	FALSE	TRUE	FALSE	urogenital_system	Bladder	BLCA	MSS/MSI-L	R
639-V	906798	FALSE	TRUE	FALSE	urogenital_system	Bladder	BLCA	MSS/MSI-L	D/F12
647-V	906797	FALSE	TRUE	FALSE	urogenital_system	Bladder	BLCA	MSS/MSI-L	D/F12
697	906800	FALSE	TRUE	FALSE	leukemia	lymphoblastic_leukemia	ALL	MSS/MSI-L	R
769-P	910922	FALSE	TRUE	TRUE	kidney	kidney	KIRC	MSS/MSI-L	R
786-0	905947	FALSE	TRUE	FALSE	kidney	kidney	KIRC	MSS/MSI-L	R
8-MG-BA	687562	FALSE	TRUE	FALSE	nervous_system	glioma	GBM	MSS/MSI-L	D/F12
8305C	906795	FALSE	TRUE	FALSE	thyroid	thyroid	THCA	MSS/MSI-L	R
8505C	924102	FALSE	TRUE	FALSE	thyroid	thyroid	THCA	MSS/MSI-L	R
A101D	910921	FALSE	TRUE	FALSE	skin	melanoma	SKCM	MSS/MSI-L	D/F12
A172	687563	FALSE	TRUE	TRUE	nervous_system	glioma	GBM	MSS/MSI-L	D/F12
A204	910784	FALSE	TRUE	FALSE	soft_tissue	rhabdomyosarcoma		MSS/MSI-L	R
A2058	906792	FALSE	TRUE	FALSE	skin	melanoma	SKCM	MSS/MSI-L	D/F12
A253	906794	FALSE	TRUE	FALSE	aero_dig_tract	head and neck		MSS/MSI-L
A2780	906804	FALSE	TRUE	TRUE	urogenital_system	ovary	UNABLE TO CLASSIFY	MSS/MSI-L	R
A3-KAW	910935	FALSE	TRUE	TRUE	lymphoma	B_cell_lymphoma	DLBC	MSS/MSI-L	R
A375	906793	FALSE	TRUE	TRUE	skin	melanoma	SKCM	MSS/MSI-L	D/F12
A388	910697	TRUE	FALSE	FALSE	skin	skin_other		MSS/MSI-L	D/F12
A4-Fuk	910934	FALSE	TRUE	TRUE	lymphoma	B_cell_lymphoma	DLBC	MSS/MSI-L	R
A427	910851	TRUE	FALSE	TRUE	lung_NSCLC	lung_NSCLC_not specified	UNABLE TO CLASSIFY	MSS/MSI-L	D/F12
A431	910925	TRUE	FALSE	TRUE	skin	skin_other		MSS/MSI-L	D/F12
A498	905948	FALSE	TRUE	TRUE	kidney	kidney	KIRC	MSS/MSI-L	D/F12
A549	905949	FALSE	TRUE	TRUE	lung_NSCLC	lung_NSCLC_adenocarcinoma	LUAD	MSS/MSI-L	D/F12
A673	684052	FALSE	TRUE	TRUE	soft_tissue	rhabdomyosarcoma		MSS/MSI-L	D/F12
A704	910920	FALSE	TRUE	FALSE	kidney	kidney	KIRC	MSS/MSI-L	D/F12
ABC-1	906791	FALSE	TRUE	TRUE	lung_NSCLC	lung_NSCLC_adenocarcinoma	LUAD	MSS/MSI-L	D/F12
ACHN	905950	FALSE	TRUE	TRUE	kidney	kidney	KIRC	MSS/MSI-L	R
ACN	906803	TRUE	FALSE	FALSE	neuroblastoma	neuroblastoma	NB
AGS	906790	FALSE	TRUE	TRUE	digestive_system	stomach	STAD	MSS/MSI-L	D/F12
ALL-PO	910944	TRUE	FALSE	FALSE	leukemia	lymphoblastic_leukemia	ALL	MSS/MSI-L	R
ALL-SIL	1295740	FALSE	TRUE	FALSE	leukemia	T_cell_leukemia	ALL	MSS/MSI-L	R
AM-38	910933	FALSE	TRUE	FALSE	nervous_system	glioma	GBM	MSS/MSI-L	D/F12
AML-193	949089	FALSE	TRUE	FALSE	leukemia	acute_myeloid_leukaemia	LAML
AMO-1	1295741	FALSE	TRUE	TRUE	myeloma	haematopoietic_neoplasm other	MM	MSS/MSI-L	R
AN3-CA	910781	FALSE	TRUE	TRUE	urogenital_system	endometrium	UCEC	MSI-H	D/F12
ARH-77	906765	TRUE	FALSE	FALSE	myeloma	myeloma	MM	MSS/MSI-L	R
ASH-3	1290722	TRUE	FALSE	FALSE	thyroid	thyroid	THCA	MSS/MSI-L	D/F12
AsPC-1	910702	FALSE	TRUE	TRUE	pancreas	pancreas	PAAD	MSS/MSI-L	R
ATN-1	910687	TRUE	FALSE	FALSE	leukemia	lymphoblastic_T_cell_leukaemia	ALL	MSS/MSI-L	R
AU565	910704	FALSE	TRUE	FALSE	breast	breast	BRCA	MSS/MSI-L	R
BALL-1	910705	TRUE	FALSE	FALSE	leukemia	B_cell_leukemia		MSS/MSI-L	R
BB30-HNC	753531	TRUE	FALSE	FALSE	aero_dig_tract	head and neck	HNSC	MSS/MSI-L	D/F12
BB49-HNC	753532	TRUE	FALSE	FALSE	aero_dig_tract	head and neck	HNSC	MSS/MSI-L	D/F12
BB65-RCC	753533	TRUE	FALSE	FALSE	kidney	kidney	KIRC	MSS/MSI-L	D/F12
BC-1	910919	TRUE	FALSE	FALSE	lymphoma	B_cell_lymphoma	DLBC	MSS/MSI-L	R
BC-3	910918	TRUE	FALSE	FALSE	lymphoma	B_cell_lymphoma	DLBC	MSS/MSI-L	R
BCPAP	924104	FALSE	TRUE	FALSE	thyroid	thyroid	THCA	MSS/MSI-L	R
BE-13	906763	TRUE	FALSE	FALSE	leukemia	lymphoblastic_leukemia	ALL	MSS/MSI-L	R
BE2-M17	753616	TRUE	FALSE	FALSE	neuroblastoma	neuroblastoma	NB	MSS/MSI-L	D/F12
Becker	906746	TRUE	FALSE	FALSE	nervous_system	glioma	GBM	MSS/MSI-L	D/F12
BEN	753534	FALSE	TRUE	TRUE	lung_NSCLC	lung_NSCLC_not specified	UNABLE TO CLASSIFY	MSS/MSI-L	D/F12
BFTC-905	910926	FALSE	TRUE	TRUE	urogenital_system	Bladder	BLCA	MSS/MSI-L	D/F12
BFTC-909	910698	FALSE	TRUE	TRUE	kidney	kidney	KIRC	MSS/MSI-L	D/F12
BHT-101	906696	FALSE	TRUE	FALSE	thyroid	thyroid	THCA	MSS/MSI-L	D/F12
BHY	753535	FALSE	TRUE	TRUE	aero_dig_tract	head and neck	HNSC	MSS/MSI-L	D/F12
BICR10	1290724	TRUE	FALSE	TRUE	aero_dig_tract	head and neck	HNSC	MSS/MSI-L	D/F12
BICR22	1240121	FALSE	TRUE	TRUE	aero_dig_tract	head and neck	HNSC	MSS/MSI-L	D/F12
BICR31	1290725	FALSE	TRUE	TRUE	aero_dig_tract	head and neck	HNSC	MSS/MSI-L	D/F12
BICR78	1240122	TRUE	FALSE	TRUE	aero_dig_tract	head and neck	HNSC	MSS/MSI-L	D/F12
BL-41	910706	FALSE	TRUE	FALSE	lymphoma	Burkitt_lymphoma		MSS/MSI-L	R
BL-70	910707	FALSE	TRUE	FALSE	lymphoma	Burkitt_lymphoma
BONNA-12	906695	TRUE	FALSE	FALSE	leukemia	hairy_cell_leukaemia		MSS/MSI-L	R
BPH-1	924105	TRUE	FALSE	FALSE	urogenital_system	prostate		MSS/MSI-L	R
BT-20	906801	FALSE	TRUE	TRUE	breast	breast	BRCA	MSS/MSI-L	D/F12
BT-474	946359	FALSE	TRUE	FALSE	breast	breast	BRCA	MSS/MSI-L	R
BT-483	949093	FALSE	TRUE	TRUE	breast	breast	BRCA	MSS/MSI-L	R
BT-549	905951	FALSE	TRUE	TRUE	breast	breast	BRCA	MSS/MSI-L	R
BV-173	910710	TRUE	TRUE	FALSE	leukemia	chronic_myeloid_leukaemia	LCML	MSS/MSI-L	R
BxPC-3	906693	FALSE	TRUE	TRUE	pancreas	pancreas	PAAD	MSS/MSI-L	R
C-33-A	687505	TRUE	FALSE	TRUE	urogenital_system	cervix	CESC	MSI-H	D/F12
C-4-I	687506	TRUE	FALSE	FALSE	urogenital_system	cervix	CESC	MSS/MSI-L	D/F12
C2BBe1	910700	TRUE	TRUE	TRUE	large_intestine	large_intestine	COREAD	MSS/MSI-L	D/F12
C32	906830	FALSE	TRUE	TRUE	skin	melanoma	SKCM	MSS/MSI-L	D/F12
C3A	910850	TRUE	FALSE	TRUE	digestive_system	liver	LIHC	MSS/MSI-L	D/F12
Ca-Ski	906824	TRUE	FALSE	TRUE	urogenital_system	cervix	CESC	MSS/MSI-L	R
CA46	910703	FALSE	TRUE	TRUE	lymphoma	Burkitt_lymphoma		MSS/MSI-L	R
Ca9-22	753538	TRUE	FALSE	FALSE	aero_dig_tract	head and neck	HNSC	MSS/MSI-L	D/F12
CADO-ES1	753539	FALSE	TRUE	FALSE	bone	ewings_sarcoma		MSS/MSI-L	R
CAKI-1	905963	FALSE	TRUE	TRUE	kidney	kidney	KIRC	MSS/MSI-L	R
CAL-120	906826	FALSE	TRUE	TRUE	breast	breast	BRCA	MSS/MSI-L	D/F12
CAL-12T	753540	FALSE	TRUE	TRUE	lung_NSCLC	lung_NSCLC_not specified	UNABLE TO CLASSIFY	MSS/MSI-L	D/F12
CAL-148	924106	FALSE	TRUE	TRUE	breast	breast	BRCA	MSS/MSI-L	D/F12
CAL-27	910916	FALSE	TRUE	TRUE	aero_dig_tract	head and neck	HNSC	MSS/MSI-L	D/F12
CAL-29	1290730	FALSE	TRUE	FALSE	urogenital_system	Bladder	BLCA	MSS/MSI-L	D/F12
CAL-33	753541	FALSE	TRUE	FALSE	aero_dig_tract	head and neck	HNSC	MSS/MSI-L	D/F12
CAL-39	924107	TRUE	FALSE	FALSE	urogenital_system	cervix	CESC	MSS/MSI-L	D/F12
CAL-51	910927	FALSE	TRUE	TRUE	breast	breast	BRCA	MSS/MSI-L	D/F12
CAL-54	910952	FALSE	TRUE	TRUE	kidney	kidney	KIRC	MSS/MSI-L	D/F12
CAL-62	906828	FALSE	TRUE	FALSE	thyroid	thyroid	THCA	MSS/MSI-L	D/F12
CAL-72	906827	TRUE	FALSE	FALSE	bone	osteosarcoma		MSS/MSI-L	D/F12
CAL-78	1290765	TRUE	TRUE	FALSE	bone	chondrosarcoma		MSS/MSI-L	R+10
CAL-85-1	910852	FALSE	TRUE	TRUE	breast	breast	BRCA	MSS/MSI-L	D/F12
Calu-3	687777	FALSE	TRUE	TRUE	lung_NSCLC	lung_NSCLC_adenocarcinoma	LUAD	MSS/MSI-L	D/F12
Calu-6	724859	FALSE	TRUE	TRUE	lung_NSCLC	lung_NSCLC_adenocarcinoma	LUAD	MSS/MSI-L	D/F12
CAMA-1	946382	FALSE	TRUE	TRUE	breast	breast	BRCA	MSS/MSI-L	D/F12
Caov-3	906825	FALSE	TRUE	TRUE	urogenital_system	ovary	OV	MSS/MSI-L	D/F12
Caov-4	949090	FALSE	TRUE	FALSE	urogenital_system	ovary	OV	MSS/MSI-L	D/F12
CAPAN-1	753624	FALSE	TRUE	FALSE	pancreas	pancreas	PAAD	MSS/MSI-L	D/F12
Capan-2	910915	FALSE	TRUE	TRUE	pancreas	pancreas	PAAD	MSS/MSI-L	R
CaR-1	924108	TRUE	FALSE	TRUE	large_intestine	large_intestine	COREAD	MSS/MSI-L	D/F12
CAS-1	910943	FALSE	TRUE	FALSE	nervous_system	glioma	GBM	MSS/MSI-L	D/F12
CCF-STTG1	906823	FALSE	TRUE	FALSE	nervous_system	glioma	GBM	MSS/MSI-L	R
CCK-81	1240123	TRUE	TRUE	FALSE	large_intestine	large_intestine	COREAD	MSI-H	R
CCRF-CEM	905952	TRUE	FALSE	FALSE	leukemia	lymphoblastic_leukemia	ALL	MSS/MSI-L	R
CESS	910688	TRUE	FALSE	FALSE	leukemia	acute_myeloid_leukaemia	LAML	MSS/MSI-L	R
CFPAC-1	906821	FALSE	TRUE	FALSE	pancreas	pancreas	PAAD	MSS/MSI-L	R
CGTH-W-1	910568	TRUE	FALSE	FALSE	thyroid	thyroid	THCA	MSS/MSI-L	R
ChaGo-K-1	687596	FALSE	TRUE	TRUE	lung_NSCLC	lung_NSCLC_not specified	UNABLE TO CLASSIFY	MSS/MSI-L	R
CHL-1	910853	TRUE	FALSE	FALSE	skin	melanoma	SKCM	MSS/MSI-L	D/F12
CHP-126	910567	FALSE	TRUE	FALSE	neuroblastoma	neuroblastoma	NB	MSS/MSI-L	R
CHP-134	910941	TRUE	FALSE	FALSE	neuroblastoma	neuroblastoma	NB	MSS/MSI-L	R
CHP-212	906820	FALSE	TRUE	TRUE	neuroblastoma	neuroblastoma	NB	MSS/MSI-L	D/F12
CHSA0011	1290767	TRUE	FALSE	FALSE	bone	chondrosarcoma			R+10
CHSA0108	1290768	TRUE	FALSE	FALSE	bone	chondrosarcoma			R+10
CHSA8926	1303912	TRUE	FALSE	FALSE	bone	chondrosarcoma		MSS/MSI-L	R
CL-11	1290769	FALSE	TRUE	TRUE	large_intestine	large_intestine	COREAD	MSS/MSI-L	D/F12
CL-14	1290770	FALSE	TRUE	FALSE	large_intestine	large_intestine
CL-34	1290771	FALSE	TRUE	TRUE	large_intestine	large_intestine	COREAD		D/F12
CL-40	1240124	TRUE	TRUE	TRUE	large_intestine	large_intestine	COREAD	MSS/MSI-L	D/F12
CMK	910566	FALSE	TRUE	FALSE	leukemia	acute_myeloid_leukaemia	LAML	MSS/MSI-L	R
CML-T1	910951	TRUE	TRUE	FALSE	leukemia	chronic_myeloid_leukaemia	LCML	MSS/MSI-L	D/F12
COLO-205	905961	TRUE	FALSE	TRUE	large_intestine	large_intestine	COREAD	MSS/MSI-L	R
COLO-320-HSR	910569	TRUE	FALSE	FALSE	large_intestine	large_intestine	COREAD	MSS/MSI-L	R
COLO-668	910692	FALSE	TRUE	FALSE	lung_SCLC	lung_small_cell_carcinoma	SCLC	MSS/MSI-L	R
COLO-678	910689	FALSE	TRUE	FALSE	large_intestine	large_intestine	COREAD	MSS/MSI-L	R
COLO-679	906818	FALSE	TRUE	TRUE	skin	melanoma	SKCM	MSS/MSI-L	R
COLO-680N	906817	FALSE	TRUE	TRUE	aero_dig_tract	oesophagus	ESCA	MSS/MSI-L	R
COLO-684	910691	FALSE	TRUE	FALSE	urogenital_system	endometrium	UCEC	MSI-H	R
COLO-741	906815	TRUE	TRUE	TRUE	large_intestine	large_intestine	COREAD
COLO-783	1240125	FALSE	TRUE	TRUE	skin	melanoma	SKCM	MSS/MSI-L	R
COLO-792	906814	FALSE	TRUE	TRUE	skin	melanoma	SKCM	MSS/MSI-L	R
COLO-800	906813	FALSE	TRUE	TRUE	skin	melanoma	SKCM	MSS/MSI-L	R
COLO-824	906812	TRUE	FALSE	FALSE	breast	breast	BRCA	MSS/MSI-L	R
COLO-829	687448	FALSE	TRUE	TRUE	skin	melanoma	SKCM	MSS/MSI-L	R
COR-L105	906805	FALSE	TRUE	FALSE	lung_NSCLC	lung_NSCLC_adenocarcinoma	LUAD	MSS/MSI-L	R
COR-L23	687780	FALSE	TRUE	FALSE	lung_NSCLC	lung_NSCLC_large cell		MSS/MSI-L	R
COR-L24	1322211	FALSE	TRUE	FALSE	lung_SCLC	lung_small_cell_carcinoma	SCLC
COR-L279	910937	FALSE	TRUE	TRUE	lung_SCLC	lung_small_cell_carcinoma	SCLC	MSS/MSI-L	R+10
COR-L303	1297438	TRUE	FALSE	FALSE	lung_SCLC	lung_small_cell_carcinoma	SCLC	MSS/MSI-L	R
COR-L311	687980	FALSE	TRUE	FALSE	lung_SCLC	lung_small_cell_carcinoma	SCLC	MSS/MSI-L	R
COR-L32	1322212	TRUE	FALSE	FALSE	lung_SCLC	lung_small_cell_carcinoma	SCLC	MSS/MSI-L	R
COR-L321	1322213	TRUE	FALSE	FALSE	lung	Lung_other	UNABLE TO CLASSIFY	MSS/MSI-L	R
COR-L47	753544	FALSE	TRUE	TRUE	lung_SCLC	lung_small_cell_carcinoma	SCLC
COR-L88	906808	FALSE	TRUE	TRUE	lung_SCLC	lung_small_cell_carcinoma	SCLC	MSS/MSI-L	R+10
COR-L95	1297439	FALSE	TRUE	FALSE	lung_SCLC	lung_small_cell_carcinoma	SCLC	MSS/MSI-L	R+10
CP50-MEL-B	753545	TRUE	FALSE	FALSE	skin	melanoma	SKCM	MSS/MSI-L	D/F12
CP66-MEL	753546	TRUE	FALSE	FALSE	skin	melanoma	SKCM	MSS/MSI-L	D/F12
CP67-MEL	949092	TRUE	FALSE	FALSE	skin	melanoma	SKCM	MSS/MSI-L	D/F12
CPC-N	753547	TRUE	FALSE	TRUE	lung_SCLC	lung_small_cell_carcinoma	SCLC	MSS/MSI-L	R+10
CRO-AP2	906807	TRUE	FALSE	FALSE	lymphoma	B_cell_lymphoma	DLBC	MSS/MSI-L	R
CRO-AP3	1297440	TRUE	FALSE	FALSE	lymphoma	B_cell_lymphoma	DLBC
CS1	1290795	TRUE	FALSE	FALSE	bone	bone_other		MSS/MSI-L	R
CTB-1	949088	TRUE	FALSE	FALSE	lymphoma	B_cell_lymphoma	DLBC	MSS/MSI-L	R
CTV-1	753548	TRUE	FALSE	FALSE	leukemia	acute_myeloid_leukaemia	LAML	MSI-H	R
CW-2	910554	FALSE	TRUE	TRUE	large_intestine	large_intestine	COREAD	MSI-H	R
D-247MG	946367	TRUE	FALSE	FALSE	nervous_system	glioma	GBM	MSS/MSI-L	D/F12
D-263MG	946368	TRUE	FALSE	FALSE	nervous_system	glioma	GBM	MSS/MSI-L	D/F12
D-283MED	906834	FALSE	TRUE	FALSE	nervous_system	medulloblastoma	MB	MSS/MSI-L	D/F12
D-336MG	946369	TRUE	FALSE	FALSE	nervous_system	glioma	LGG	MSS/MSI-L	D/F12
D-341MED	946378	FALSE	TRUE	FALSE	nervous_system	medulloblastoma	MB
D-392MG	946370	TRUE	FALSE	FALSE	nervous_system	glioma	GBM	MSS/MSI-L	D/F12
D-423MG	946372	TRUE	FALSE	FALSE	nervous_system	glioma	GBM	MSS/MSI-L	D/F12
D-502MG	946373	TRUE	FALSE	FALSE	nervous_system	glioma	LGG	MSS/MSI-L	D/F12
D-542MG	753549	TRUE	FALSE	FALSE	nervous_system	glioma	GBM	MSS/MSI-L	D/F12
D-566MG	946377	TRUE	FALSE	FALSE	nervous_system	glioma	GBM	MSS/MSI-L	D/F12
DAN-G	1290797	FALSE	TRUE	TRUE	pancreas	pancreas	PAAD	MSS/MSI-L	R
Daoy	906833	FALSE	TRUE	FALSE	nervous_system	medulloblastoma	MB	MSS/MSI-L	D/F12
Daudi	906831	FALSE	TRUE	TRUE	lymphoma	Burkitt_lymphoma		MSS/MSI-L	R
DB	906832	FALSE	TRUE	FALSE	lymphoma	B_cell_lymphoma	DLBC	MSS/MSI-L	R
DBTRG-05MG	906835	FALSE	TRUE	FALSE	nervous_system	glioma	GBM	MSS/MSI-L	R
DEL	906836	FALSE	TRUE	FALSE	lymphoma	lymphoid_neoplasm other		MSS/MSI-L	R
Detroit562	906837	FALSE	TRUE	TRUE	aero_dig_tract	head and neck	HNSC	MSS/MSI-L	D/F12
DG-75	906838	TRUE	FALSE	FALSE	lymphoma	Burkitt_lymphoma		MSI-H	R
DIFI	1789883	TRUE	FALSE	FALSE	large_intestine	large_intestine	COREAD	MSS/MSI-L	D/F12
DJM-1	906841	TRUE	FALSE	FALSE	skin	skin_other		MSS/MSI-L	D/F12
DK-MG	906839	FALSE	TRUE	FALSE	nervous_system	glioma	GBM	MSS/MSI-L	R
DMS-114	687983	FALSE	TRUE	FALSE	lung_SCLC	lung_small_cell_carcinoma	SCLC	MSS/MSI-L	D/F12
DMS-153	687984	FALSE	TRUE	FALSE	lung_SCLC	lung_small_cell_carcinoma	SCLC
DMS-273	687985	FALSE	TRUE	TRUE	lung_SCLC	lung_small_cell_carcinoma	SCLC	MSS/MSI-L	H
DMS-53	907295	FALSE	TRUE	TRUE	lung_SCLC	lung_small_cell_carcinoma	SCLC	MSS/MSI-L	H
DMS-79	753551	FALSE	TRUE	TRUE	lung_SCLC	lung_small_cell_carcinoma	SCLC		R+10
DMS454	1297445	FALSE	TRUE	TRUE	lung_SCLC	lung_small_cell_carcinoma	SCLC
DND-41	1297446	TRUE	TRUE	FALSE	leukemia	T_cell_leukemia	ALL	MSI-H	R
DOHH-2	906842	FALSE	TRUE	TRUE	lymphoma	B_cell_lymphoma	DLBC	MSS/MSI-L	R
DOK	910936	TRUE	FALSE	TRUE	aero_dig_tract	head and neck	HNSC	MSS/MSI-L	D/F12
DoTc2-4510	906843	TRUE	FALSE	FALSE	urogenital_system	cervix	CESC	MSS/MSI-L	D/F12
DOV13	1479987	TRUE	FALSE	FALSE	urogenital_system	ovary	OV	MSS/MSI-L	D/F12
DSH1	753552	TRUE	FALSE	FALSE	urogenital_system	Bladder	BLCA	MSS/MSI-L	R
DU-145	905935	TRUE	TRUE	TRUE	urogenital_system	prostate	PRAD	MSI-H	D/F12
DU-4475	906844	FALSE	TRUE	TRUE	breast	breast	BRCA	MSS/MSI-L	R
EB-3	906847	TRUE	FALSE	TRUE	lymphoma	Burkitt_lymphoma		MSS/MSI-L	R
EB2	906846	TRUE	FALSE	TRUE	lymphoma	Burkitt_lymphoma		MSS/MSI-L	R
EBC-1	753554	FALSE	TRUE	TRUE	lung_NSCLC	lung_NSCLC_squamous_cell_carcinoma	LUSC	MSS/MSI-L	D/F12
EC-GI-10	753555	FALSE	TRUE	FALSE	aero_dig_tract	oesophagus	ESCA	MSS/MSI-L	D/F12
ECC10	906848	FALSE	TRUE	FALSE	digestive_system	stomach		MSS/MSI-L	R
ECC12	906849	FALSE	TRUE	FALSE	digestive_system	stomach		MSS/MSI-L	R
EFM-19	906851	FALSE	TRUE	FALSE	breast	breast	BRCA	MSS/MSI-L	R
EFM-192A	1290798	FALSE	TRUE	FALSE	breast	breast	BRCA	MSS/MSI-L	R
EFO-21	911905	FALSE	TRUE	FALSE	urogenital_system	ovary	OV	MSS/MSI-L	R
EFO-27	906852	FALSE	TRUE	TRUE	urogenital_system	ovary		MSI-H	R
EGI-1	906853	TRUE	FALSE	FALSE	digestive_system	biliary_tract		MSS/MSI-L	D/F12
EHEB	906854	FALSE	TRUE	FALSE	lymphoma	lymphoid_neoplasm other	CLL	MSS/MSI-L	R
EJM	1297447	FALSE	TRUE	TRUE	myeloma	lymphoid_neoplasm other	MM	MSS/MSI-L	D/F12
EKVX	905970	FALSE	TRUE	TRUE	lung_NSCLC	lung_NSCLC_adenocarcinoma	LUAD	MSS/MSI-L	D/F12
EM-2	906855	TRUE	TRUE	FALSE	leukemia	chronic_myeloid_leukaemia	LCML	MSS/MSI-L	R
EMC-BAC-1	1503369	TRUE	FALSE	FALSE	lung_NSCLC	lung_NSCLC_adenocarcinoma	LUAD	MSS/MSI-L	R
EMC-BAC-2	1503370	TRUE	FALSE	FALSE	lung_NSCLC	lung_NSCLC_adenocarcinoma	LUAD	MSS/MSI-L	R
EN	1240127	FALSE	TRUE	FALSE	urogenital_system	endometrium	UCEC	MSS/MSI-L	R
EoL-1-cell	906856	TRUE	TRUE	FALSE	leukemia	haematopoietic_neoplasm other		MSS/MSI-L	R
EPLC-272H	753556	FALSE	TRUE	TRUE	lung_NSCLC	lung_NSCLC_squamous_cell_carcinoma	LUSC	MSS/MSI-L	R+10
ES-2	1240128	FALSE	TRUE	TRUE	urogenital_system	ovary		MSS/MSI-L	R
ES1	949158	TRUE	FALSE	FALSE	bone	ewings_sarcoma		MSS/MSI-L	R
ES3	684055	TRUE	FALSE	FALSE	bone	ewings_sarcoma		MSS/MSI-L	R
ES4	949156	TRUE	FALSE	FALSE	bone	ewings_sarcoma		MSS/MSI-L	R
ES5	684057	TRUE	FALSE	FALSE	bone	ewings_sarcoma		MSS/MSI-L	R
ES6	949157	TRUE	FALSE	FALSE	bone	ewings_sarcoma		MSS/MSI-L	R
ES7	684059	TRUE	FALSE	FALSE	bone	ewings_sarcoma		MSS/MSI-L	R
ES8	949155	TRUE	FALSE	FALSE	bone	ewings_sarcoma		MSS/MSI-L	R
ESO26	1503366	TRUE	FALSE	FALSE	aero_dig_tract	oesophagus	ESCA	MSS/MSI-L	R
ESO51	1503367	TRUE	FALSE	FALSE	aero_dig_tract	oesophagus	ESCA	MSS/MSI-L	R
ESS-1	907000	FALSE	TRUE	FALSE	urogenital_system	endometrium		MSS/MSI-L	R
ETK-1	906861	TRUE	FALSE	FALSE	digestive_system	biliary_tract		MSS/MSI-L	R
EVSA-T	906862	TRUE	FALSE	TRUE	breast	breast	BRCA	MSS/MSI-L	D/F12
EW-1	949163	TRUE	FALSE	FALSE	bone	ewings_sarcoma		MSS/MSI-L	R
EW-11	684062	TRUE	FALSE	FALSE	bone	ewings_sarcoma		MSS/MSI-L	R
EW-12	949162	TRUE	FALSE	FALSE	bone	ewings_sarcoma		MSS/MSI-L	R
EW-13	949166	TRUE	FALSE	FALSE	bone	ewings_sarcoma		MSS/MSI-L	R
EW-16	949165	TRUE	FALSE	FALSE	bone	ewings_sarcoma		MSS/MSI-L	R
EW-18	949164	TRUE	FALSE	FALSE	bone	ewings_sarcoma		MSS/MSI-L	R
EW-22	949167	TRUE	FALSE	FALSE	bone	ewings_sarcoma		MSS/MSI-L	R
EW-24	949168	TRUE	FALSE	FALSE	bone	ewings_sarcoma		MSS/MSI-L	R
EW-3	949161	TRUE	FALSE	FALSE	bone	ewings_sarcoma		MSS/MSI-L	R
EW-7	949160	TRUE	FALSE	FALSE	bone	ewings_sarcoma		MSS/MSI-L	R
FADU	906863	FALSE	TRUE	TRUE	aero_dig_tract	head and neck	HNSC	MSS/MSI-L	D/F12
Farage	1297449	TRUE	FALSE	TRUE	lymphoma	B_cell_lymphoma	DLBC	MSS/MSI-L	R
FLO-1	1503361	TRUE	FALSE	FALSE	aero_dig_tract	oesophagus	ESCA	MSS/MSI-L	R
FTC-133	906864	FALSE	TRUE	FALSE	thyroid	thyroid	THCA	MSS/MSI-L	D/F12
FU-OV-1	1240129	FALSE	TRUE	FALSE	urogenital_system	ovary	OV	MSS/MSI-L	D/F12
FU97	1290806	FALSE	TRUE	FALSE	digestive_system	stomach	STAD	MSS/MSI-L	D/F12
G-292-Clone-A141B1	1290807	FALSE	TRUE	FALSE	bone	osteosarcoma		MSS/MSI-L	R
G-361	906865	FALSE	TRUE	FALSE	skin	melanoma	SKCM	MSS/MSI-L	R
G-401	907299	FALSE	TRUE	FALSE	kidney	kidney		MSS/MSI-L	R
G-402	907298	FALSE	TRUE	TRUE	soft_tissue	soft_tissue_other		MSS/MSI-L	R
G-MEL	1240130	TRUE	FALSE	FALSE	skin	melanoma	SKCM	MSS/MSI-L	D/F12
GA-10	1303896	FALSE	TRUE	TRUE	lymphoma	Burkitt_lymphoma		MSS/MSI-L	R
GAK	910932	TRUE	FALSE	FALSE	skin	melanoma	SKCM	MSS/MSI-L	D/F12
GAMG	906868	FALSE	TRUE	FALSE	nervous_system	glioma	LGG	MSS/MSI-L	D/F12
GB-1	687568	FALSE	TRUE	FALSE	nervous_system	glioma	GBM	MSS/MSI-L	D/F12
GCIY	906869	TRUE	TRUE	FALSE	digestive_system	stomach	STAD	MSS/MSI-L	D/F12
GCT	906999	FALSE	TRUE	FALSE	soft_tissue	soft_tissue_other		MSS/MSI-L	R
GDM-1	906870	FALSE	TRUE	FALSE	leukemia	acute_myeloid_leukaemia	LAML	MSS/MSI-L	R
GEO	2164691	TRUE	FALSE	FALSE	large_intestine	large_intestine	COREAD	unknown
GI-1	906871	FALSE	TRUE	FALSE	nervous_system	glioma	LGG	MSS/MSI-L	D/F12
GI-ME-N	906872	TRUE	FALSE	FALSE	neuroblastoma	neuroblastoma	NB	MSS/MSI-L	R
GMS-10	906873	FALSE	TRUE	FALSE	nervous_system	glioma	GBM	MSS/MSI-L	D/F12
GOTO	906875	TRUE	FALSE	FALSE	neuroblastoma	neuroblastoma	NB	MSS/MSI-L	R
GP5d	907291	TRUE	FALSE	TRUE	large_intestine	large_intestine	COREAD	MSI-H	D/F12
GR-ST	906877	TRUE	FALSE	FALSE	leukemia	lymphoblastic_leukemia	ALL	MSI-H	R
GRANTA-519	1303897	FALSE	TRUE	FALSE	lymphoma	B_cell_lymphoma	DLBC	MSS/MSI-L	D/F12
GT3TKB	907041	TRUE	FALSE	FALSE	digestive_system	stomach	STAD	MSS/MSI-L	D/F12
H-EMC-SS	907290	TRUE	FALSE	FALSE	bone	chondrosarcoma		MSS/MSI-L	D/F12+10
H2369	1290808	TRUE	FALSE	FALSE	lung	mesothelioma	MESO	MSS/MSI-L	R
H2373	1290809	TRUE	FALSE	FALSE	lung	mesothelioma	MESO	MSS/MSI-L	R
H2461	1290810	TRUE	FALSE	FALSE	lung	mesothelioma	MESO	MSS/MSI-L	R
H2591	1240131	TRUE	FALSE	FALSE	lung	mesothelioma	MESO	MSS/MSI-L	R
H2595	1240132	TRUE	FALSE	FALSE	lung	mesothelioma	MESO	MSS/MSI-L	R+10
H2722	1290812	TRUE	FALSE	FALSE	lung	mesothelioma	MESO	MSS/MSI-L	R
H2731	1240134	TRUE	FALSE	FALSE	lung	mesothelioma	MESO	MSS/MSI-L	R
H2795	1290813	TRUE	FALSE	FALSE	lung	mesothelioma	MESO	MSS/MSI-L	R
H2803	1240135	TRUE	FALSE	FALSE	lung	mesothelioma	MESO	MSS/MSI-L	R
H2804	1240136	TRUE	FALSE	FALSE	lung	mesothelioma	MESO	MSS/MSI-L	R
H2810	1240137	TRUE	FALSE	FALSE	lung	mesothelioma	MESO	MSS/MSI-L	R
H2818	1290814	TRUE	FALSE	FALSE	lung	mesothelioma	MESO	MSS/MSI-L	R
H2869	1240138	TRUE	FALSE	FALSE	lung	mesothelioma	MESO	MSS/MSI-L	R
H290	1240139	TRUE	FALSE	FALSE	lung	mesothelioma	MESO	MSS/MSI-L	R
H3118	1240140	TRUE	FALSE	FALSE	aero_dig_tract	head and neck		MSS/MSI-L	R
H3255	1247873	FALSE	TRUE	FALSE	lung_NSCLC	lung_NSCLC_adenocarcinoma	LUAD	MSS/MSI-L	R
H4	907042	FALSE	TRUE	FALSE	nervous_system	glioma	LGG	MSS/MSI-L	D/F12
H513	1240141	TRUE	FALSE	FALSE	lung	mesothelioma	MESO	MSS/MSI-L	R
H9	907043	TRUE	FALSE	FALSE	lymphoma	lymphoid_neoplasm other		MSS/MSI-L	R
HA7-RCC	753558	TRUE	FALSE	FALSE	kidney	kidney	KIRC	MSS/MSI-L	D/F12
HAL-01	949153	TRUE	FALSE	FALSE	leukemia	lymphoblastic_leukemia	ALL	MSS/MSI-L	R
HARA	1240142	FALSE	TRUE	FALSE	lung_NSCLC	lung_NSCLC_squamous_cell_carcinoma	LUSC	MSS/MSI-L	R
HC-1	907044	TRUE	FALSE	FALSE	leukemia	hairy_cell_leukaemia		MSS/MSI-L	R
HCC-15	1240143	FALSE	TRUE	TRUE	lung_NSCLC	lung_NSCLC_squamous_cell_carcinoma	LUSC	MSS/MSI-L	D/F12
HCC-33	1303901	FALSE	TRUE	TRUE	lung_SCLC	lung_small_cell_carcinoma	SCLC	MSS/MSI-L	R
HCC-366	1240144	FALSE	TRUE	TRUE	lung_NSCLC	lung_NSCLC_not specified		MSS/MSI-L	R
HCC-44	1240145	FALSE	TRUE	TRUE	lung_NSCLC	lung_NSCLC_adenocarcinoma	LUAD	MSS/MSI-L	R
HCC-56	1290907	FALSE	TRUE	FALSE	large_intestine	large_intestine	COREAD	MSS/MSI-L	R
HCC-78	1290908	FALSE	TRUE	TRUE	lung_NSCLC	lung_NSCLC_adenocarcinoma	LUAD	MSS/MSI-L	R
HCC-827	1240146	FALSE	TRUE	TRUE	lung_NSCLC	lung_NSCLC_adenocarcinoma	LUAD	MSS/MSI-L	R
HCC1143	749710	FALSE	TRUE	TRUE	breast	breast	BRCA	MSS/MSI-L	R
HCC1187	749711	TRUE	TRUE	TRUE	breast	breast	BRCA	MSS/MSI-L	R
HCC1395	749712	FALSE	TRUE	TRUE	breast	breast	BRCA	MSS/MSI-L	R
HCC1419	907045	FALSE	TRUE	TRUE	breast	breast	BRCA	MSS/MSI-L	R
HCC1428	1290905	FALSE	TRUE	FALSE	breast	breast	BRCA	MSS/MSI-L	R
HCC1500	1303900	FALSE	TRUE	TRUE	breast	breast	BRCA	MSS/MSI-L	R
HCC1569	907046	FALSE	TRUE	FALSE	breast	breast	BRCA	MSI-H	R
HCC1599	749713	FALSE	TRUE	TRUE	breast	breast	BRCA	MSS/MSI-L	R
HCC1806	907047	TRUE	TRUE	FALSE	breast	breast		MSS/MSI-L	R
HCC1937	749714	FALSE	TRUE	FALSE	breast	breast	BRCA	MSS/MSI-L	R
HCC1954	749709	FALSE	TRUE	TRUE	breast	breast	BRCA	MSS/MSI-L	R
HCC202	1290906	FALSE	TRUE	TRUE	breast	breast	BRCA	MSS/MSI-L	R
HCC2157	749715	FALSE	TRUE	TRUE	breast	breast	BRCA	MSS/MSI-L	D/F12
HCC2218	749716	FALSE	TRUE	TRUE	breast	breast	BRCA	MSS/MSI-L	R
HCC2998	905971	TRUE	FALSE	FALSE	large_intestine	large_intestine	COREAD	MSS/MSI-L	R
HCC38	749717	FALSE	TRUE	TRUE	breast	breast	BRCA	MSS/MSI-L	R
HCC70	907048	FALSE	TRUE	TRUE	breast	breast	BRCA	MSS/MSI-L	R
HCE-4	753559	TRUE	FALSE	FALSE	aero_dig_tract	oesophagus	ESCA	MSS/MSI-L	D/F12
HCT-116	905936	TRUE	TRUE	TRUE	large_intestine	large_intestine	COREAD	MSI-H	R
HCT-15	905937	TRUE	TRUE	TRUE	large_intestine	large_intestine	COREAD	MSI-H	R
HD-MY-Z	907050	FALSE	TRUE	FALSE	lymphoma	Hodgkin_lymphoma		MSS/MSI-L	R
HDLM-2	924110	TRUE	FALSE	FALSE	lymphoma	Hodgkin_lymphoma		MSS/MSI-L	R
HDQ-P1	1290922	FALSE	TRUE	FALSE	breast	breast	BRCA	MSS/MSI-L	D/F12
HEC-1	907051	TRUE	FALSE	FALSE	urogenital_system	endometrium	UCEC	MSI-H	D/F12
HEL	907053	FALSE	TRUE	TRUE	leukemia	acute_myeloid_leukaemia	LAML	MSS/MSI-L	R
HeLa	1298134	TRUE	FALSE	TRUE	urogenital_system	cervix	CESC	MSS/MSI-L	D/F12
Hep3B2-1-7	1240147	FALSE	TRUE	FALSE	digestive_system	liver	LIHC	MSS/MSI-L	D/F12+10
Hey	1479988	TRUE	FALSE	TRUE	urogenital_system	ovary	OV	MSS/MSI-L	R
HGC-27	907055	FALSE	TRUE	TRUE	digestive_system	stomach	STAD	MSS/MSI-L	D/F12
HH	907056	FALSE	TRUE	FALSE	leukemia	T_cell_leukemia	ALL	MSS/MSI-L	R
HL-60	905938	FALSE	TRUE	TRUE	leukemia	acute_myeloid_leukaemia	LAML	MSS/MSI-L	D/F12
HLE	907057	TRUE	FALSE	FALSE	digestive_system	liver	LIHC	MSS/MSI-L	D/F12
HMV-II	907058	TRUE	FALSE	FALSE	skin	melanoma	SKCM	MSS/MSI-L	R
HN	907059	TRUE	FALSE	TRUE	aero_dig_tract	head and neck	HNSC	MSS/MSI-L	D/F12
HO-1-N-1	924111	TRUE	FALSE	FALSE	aero_dig_tract	head and neck	HNSC	MSS/MSI-L	D/F12+10
HO-1-u-1	753561	TRUE	FALSE	FALSE	aero_dig_tract	head and neck	HNSC	MSS/MSI-L	D/F12+10
HOP-62	905972	FALSE	TRUE	TRUE	lung_NSCLC	lung_NSCLC_adenocarcinoma	LUAD	MSS/MSI-L	R
HOP-92	905973	FALSE	TRUE	TRUE	lung_NSCLC	lung_NSCLC_large cell		MSS/MSI-L	D/F12+10
HOS	907060	FALSE	TRUE	FALSE	bone	osteosarcoma		MSS/MSI-L	D/F12
HPAC	1298136	FALSE	TRUE	TRUE	pancreas	pancreas	PAAD	MSS/MSI-L	D/F12
HPAF-II	724869	FALSE	TRUE	FALSE	pancreas	pancreas	PAAD	MSS/MSI-L	D/F12
Hs-445	1322218	TRUE	FALSE	FALSE	lymphoma	Hodgkin_lymphoma		MSS/MSI-L	R
Hs-578-T	905957	FALSE	TRUE	TRUE	breast	breast	BRCA	MSS/MSI-L	D/F12
Hs-633T	1240149	TRUE	FALSE	FALSE	soft_tissue	fibrosarcoma		MSS/MSI-L	D/F12
Hs-683	1240150	FALSE	TRUE	TRUE	nervous_system	glioma	LGG	MSS/MSI-L	D/F12
Hs-737-T	1322222	FALSE	TRUE	FALSE	bone	bone_other
Hs-766T	1298141	FALSE	TRUE	FALSE	pancreas	pancreas	PAAD	MSS/MSI-L	D/F12
Hs-939-T	1298144	FALSE	TRUE	FALSE	skin	melanoma	SKCM	MSS/MSI-L	D/F12
Hs-940-T	1298145	FALSE	TRUE	TRUE	skin	melanoma	SKCM	MSS/MSI-L	D/F12
Hs746T	1240151	FALSE	TRUE	TRUE	digestive_system	stomach	STAD	MSS/MSI-L	D/F12
HSC-2	753562	FALSE	TRUE	FALSE	aero_dig_tract	head and neck	HNSC	MSS/MSI-L	D/F12
HSC-3	907061	FALSE	TRUE	FALSE	aero_dig_tract	head and neck	HNSC	MSS/MSI-L	D/F12
HSC-39	1322224	TRUE	FALSE	FALSE	digestive_system	stomach	STAD	MSS/MSI-L	D/F12
HSC-4	907062	FALSE	TRUE	FALSE	aero_dig_tract	head and neck	HNSC	MSS/MSI-L	D/F12
HT	907063	FALSE	TRUE	TRUE	lymphoma	B_cell_lymphoma	DLBC	MSI-H	R
HT-1080	907064	FALSE	TRUE	TRUE	soft_tissue	fibrosarcoma		MSS/MSI-L	D/F12
HT-115	907289	TRUE	TRUE	TRUE	large_intestine	large_intestine	COREAD	MSS/MSI-L	D/F12
HT-1197	907065	FALSE	TRUE	FALSE	urogenital_system	Bladder	BLCA	MSS/MSI-L	D/F12
HT-1376	907066	FALSE	TRUE	FALSE	urogenital_system	Bladder	BLCA	MSS/MSI-L	D/F12
HT-144	907067	FALSE	TRUE	TRUE	skin	melanoma	SKCM	MSS/MSI-L	R
HT-29	905939	TRUE	TRUE	TRUE	large_intestine	large_intestine	COREAD	MSS/MSI-L	R
HT-3	907068	TRUE	FALSE	FALSE	urogenital_system	cervix	CESC	MSS/MSI-L	R
HT55	907287	TRUE	TRUE	TRUE	large_intestine	large_intestine	COREAD	MSS/MSI-L	D/F12
HTC-C3	924151	TRUE	FALSE	FALSE	thyroid	thyroid	THCA	MSS/MSI-L	D/F12
HuCCT1	907069	FALSE	TRUE	FALSE	digestive_system	biliary_tract		MSS/MSI-L	R
huH-1	1298146	FALSE	TRUE	TRUE	digestive_system	liver	LIHC	MSS/MSI-L	D/F12
HUH-6-clone5	907070	TRUE	FALSE	FALSE	digestive_system	liver
HuH-7	907071	FALSE	TRUE	TRUE	digestive_system	liver	LIHC	MSS/MSI-L	D/F12+10
HuO-3N1	909977	TRUE	FALSE	FALSE	bone	osteosarcoma		MSS/MSI-L	R+10
HuO9	907072	TRUE	FALSE	FALSE	bone	osteosarcoma		MSS/MSI-L	R
HuP-T3	907285	FALSE	TRUE	TRUE	pancreas	pancreas	PAAD	MSS/MSI-L	R
HuP-T4	907286	FALSE	TRUE	TRUE	pancreas	pancreas	PAAD	MSS/MSI-L	D/F12
HUTU-80	907073	FALSE	TRUE	FALSE	digestive_system	digestive_system_other		MSS/MSI-L	D/F12
IA-LM	910779	FALSE	TRUE	FALSE	lung_NSCLC	lung_NSCLC_large cell		MSS/MSI-L	D/F12
IGR-1	907169	FALSE	TRUE	FALSE	skin	melanoma	SKCM	MSS/MSI-L	D/F12
IGR-37	1240153	FALSE	TRUE	TRUE	skin	melanoma	SKCM	MSS/MSI-L	D/F12
IGROV-1	905968	FALSE	TRUE	TRUE	urogenital_system	ovary	OV	MSI-H	R
IHH-4	1240154	TRUE	FALSE	FALSE	thyroid	thyroid	THCA	MSS/MSI-L	D/F12
IM-9	753563	TRUE	FALSE	FALSE	myeloma	myeloma	MM	MSS/MSI-L	R
IM-95	1240155	FALSE	TRUE	TRUE	digestive_system	stomach	STAD	MSS/MSI-L	R
IMR-5	907170	TRUE	FALSE	FALSE	neuroblastoma	neuroblastoma	NB	MSS/MSI-L	R
IPC-298	907171	FALSE	TRUE	TRUE	skin	melanoma	SKCM	MSS/MSI-L	R
Ishikawa(Heraklio)02ER-	1240156	FALSE	TRUE	FALSE	urogenital_system	uterus
IST-MEL1	907172	TRUE	FALSE	FALSE	skin	melanoma	SKCM	MSS/MSI-L	R
IST-MES1	907173	TRUE	TRUE	FALSE	lung	mesothelioma	MESO	MSS/MSI-L	D/F12
IST-SL1	753564	TRUE	FALSE	FALSE	lung_SCLC	lung_small_cell_carcinoma	SCLC	MSS/MSI-L	R
IST-SL2	753565	TRUE	FALSE	FALSE	lung_SCLC	lung_small_cell_carcinoma	SCLC	MSS/MSI-L	R
J82	753566	FALSE	TRUE	FALSE	urogenital_system	Bladder	BLCA	MSS/MSI-L	D/F12
JAR	907175	TRUE	FALSE	FALSE	urogenital_system	urogenital_system_other		MSS/MSI-L	R
JEG-3	907176	TRUE	FALSE	FALSE	urogenital_system	urogenital_system_other		MSS/MSI-L	D/F12
JEKO-1	1327765	FALSE	TRUE	FALSE	lymphoma	B_cell_lymphoma	DLBC	MSS/MSI-L	R
JHH-1	1298151	FALSE	TRUE	TRUE	digestive_system	liver	LIHC	MSS/MSI-L	D/F12
JHH-2	1240157	FALSE	TRUE	TRUE	digestive_system	liver	LIHC	MSS/MSI-L	D/F12
JHH-4	1240158	FALSE	TRUE	TRUE	digestive_system	liver	LIHC	MSS/MSI-L	D/F12
JHH-6	1240159	FALSE	TRUE	FALSE	digestive_system	liver	LIHC	MSS/MSI-L	D/F12
JHH-7	1240160	FALSE	TRUE	TRUE	digestive_system	liver	LIHC	MSS/MSI-L	D/F12
JHOS-2	1479995	FALSE	TRUE	FALSE	urogenital_system	ovary	OV	MSS/MSI-L	D/F12
JHOS-3	1480358	TRUE	FALSE	FALSE	urogenital_system	ovary	OV	MSS/MSI-L	D/F12
JHOS-4	1480359	FALSE	TRUE	FALSE	urogenital_system	ovary	OV	MSS/MSI-L	D/F12
JHU-011	1240161	TRUE	FALSE	FALSE	aero_dig_tract	head and neck	HNSC	MSS/MSI-L	R
JHU-022	1240162	TRUE	FALSE	FALSE	aero_dig_tract	head and neck	HNSC	MSS/MSI-L	R
JHU-029	1298156	TRUE	FALSE	FALSE	aero_dig_tract	head and neck	HNSC		R
JIMT-1	1298157	FALSE	TRUE	TRUE	breast	breast	BRCA		D/F12
JiyoyeP-2003	907268	TRUE	FALSE	FALSE	lymphoma	Burkitt_lymphoma		MSS/MSI-L	R
JJN-3	1327766	FALSE	TRUE	TRUE	myeloma	haematopoietic_neoplasm other	MM	MSS/MSI-L	D/F12
JM1	1327768	FALSE	TRUE	FALSE	lymphoma	B_cell_lymphoma	DLBC	MSS/MSI-L	D/F12
JSC-1	1327769	TRUE	FALSE	FALSE	lymphoma	B_cell_lymphoma	DLBC	MSS/MSI-L	R
JURKAT	998184	FALSE	TRUE	TRUE	leukemia	T_cell_leukemia	ALL	MSI-H	R
JURL-MK1	1327771	FALSE	TRUE	FALSE	leukemia	chronic_myeloid_leukaemia	LCML	MSS/MSI-L	R
JVM-2	907269	FALSE	TRUE	FALSE	lymphoma	lymphoid_neoplasm other	CLL	MSS/MSI-L	R
JVM-3	907270	FALSE	TRUE	FALSE	lymphoma	lymphoid_neoplasm other	CLL	MSS/MSI-L	R
K-562	905940	FALSE	TRUE	TRUE	leukemia	chronic_myeloid_leukaemia	LCML	MSS/MSI-L	D/F12
K2	1298160	TRUE	FALSE	FALSE	skin	melanoma	SKCM		D/F12
K5	924238	TRUE	FALSE	FALSE	thyroid	thyroid	THCA	MSS/MSI-L	D/F12
KALS-1	907271	FALSE	TRUE	FALSE	nervous_system	glioma	LGG	MSS/MSI-L	R
KARPAS-1106P	1327773	TRUE	FALSE	TRUE	lymphoma	B_cell_lymphoma	DLBC	MSS/MSI-L	R
KARPAS-231	1327774	TRUE	FALSE	FALSE	leukemia	B_cell_leukemia		MSS/MSI-L	R
KARPAS-299	907273	FALSE	TRUE	FALSE	lymphoma	anaplastic_large_cell_lymphoma		MSS/MSI-L	R
KARPAS-422	907274	FALSE	TRUE	TRUE	lymphoma	B_cell_lymphoma	DLBC	MSS/MSI-L	R
KARPAS-45	907272	TRUE	FALSE	FALSE	leukemia	lymphoblastic_leukemia	ALL	MSS/MSI-L	R
KARPAS-620	1327775	TRUE	TRUE	TRUE	myeloma	haematopoietic_neoplasm other	MM	MSS/MSI-L	R
KASUMI-1	907275	FALSE	TRUE	TRUE	leukemia	acute_myeloid_leukaemia	LAML	MSS/MSI-L	R
KASUMI-6	1330930	FALSE	TRUE	FALSE	leukemia	acute_myeloid_leukaemia	LAML
KATOIII	907276	FALSE	TRUE	TRUE	digestive_system	stomach	STAD	MSS/MSI-L	D/F12
KCL-22	1330931	FALSE	TRUE	FALSE	leukemia	chronic_myeloid_leukaemia	LCML	MSI-H	R
KE-37	907277	FALSE	TRUE	FALSE	leukemia	lymphoblastic_leukemia	ALL	MSS/MSI-L	R
KELLY	753618	FALSE	TRUE	TRUE	neuroblastoma	neuroblastoma	NB	MSS/MSI-L	R
KG-1	907278	FALSE	TRUE	TRUE	leukemia	acute_myeloid_leukaemia	LAML	MSS/MSI-L	D/F12
KGN	924186	TRUE	FALSE	FALSE	urogenital_system	ovary		MSS/MSI-L	D/F12
KINGS-1	907279	TRUE	FALSE	FALSE	nervous_system	glioma	LGG	MSS/MSI-L	R
KLE	924187	FALSE	TRUE	TRUE	urogenital_system	endometrium	UCEC	MSS/MSI-L	D/F12
KM-H2	909976	FALSE	TRUE	FALSE	lymphoma	Hodgkin_lymphoma		MSS/MSI-L	R
KM12	905989	FALSE	TRUE	TRUE	large_intestine	large_intestine	COREAD	MSI-H	R
KMH-2	1298167	TRUE	FALSE	FALSE	thyroid	thyroid	THCA	MSS/MSI-L	R
KMOE-2	907280	TRUE	FALSE	FALSE	leukemia	acute_myeloid_leukaemia	LAML	MSS/MSI-L	R
KMRC-1	1298168	FALSE	TRUE	FALSE	kidney	kidney	KIRC	MSS/MSI-L	D/F12
KMRC-2	1333010	FALSE	TRUE	FALSE	kidney	kidney
KMRC-20	1298169	FALSE	TRUE	FALSE	kidney	kidney	KIRC	MSS/MSI-L	D/F12
KMRC-3	1333011	FALSE	TRUE	FALSE	kidney	kidney
KMS-11	1659817	FALSE	TRUE	TRUE	myeloma	myeloma	MM		R
KMS-12-BM	907281	FALSE	TRUE	TRUE	myeloma	myeloma	MM	MSS/MSI-L	R
KNS-42	907282	FALSE	TRUE	FALSE	nervous_system	glioma	LGG	MSS/MSI-L	D/F12
KNS-62	753569	TRUE	TRUE	TRUE	lung_NSCLC	lung_NSCLC_squamous_cell_carcinoma	LUSC	MSS/MSI-L	D/F12
KNS-81-FD	924188	TRUE	FALSE	FALSE	nervous_system	glioma	LGG	MSS/MSI-L	D/F12
KO52	1330932	TRUE	FALSE	FALSE	leukemia	acute_myeloid_leukaemia	LAML	MSS/MSI-L
KON	1298215	TRUE	FALSE	FALSE	aero_dig_tract	head and neck	HNSC	MSS/MSI-L	D/F12
KOPN-8	1330933	FALSE	TRUE	FALSE	leukemia	B_cell_leukemia		MSS/MSI-L	R
KOSC-2	753570	TRUE	FALSE	FALSE	aero_dig_tract	head and neck	HNSC	MSS/MSI-L	R
KP-1N	1298216	TRUE	FALSE	FALSE	pancreas	pancreas	PAAD	MSS/MSI-L	R
KP-2	1298218	FALSE	TRUE	FALSE	pancreas	pancreas	PAAD		D/F12
KP-3	1298219	FALSE	TRUE	TRUE	pancreas	pancreas	UNABLE TO CLASSIFY	MSS/MSI-L	R
KP-4	753572	FALSE	TRUE	TRUE	pancreas	pancreas	PAAD	MSS/MSI-L	D/F12
KP-N-RT-BM-1	924189	FALSE	TRUE	FALSE	neuroblastoma	neuroblastoma	NB	MSS/MSI-L	R
KP-N-YN	907314	FALSE	TRUE	FALSE	neuroblastoma	neuroblastoma	NB	MSS/MSI-L	R
KP-N-YS	946363	TRUE	FALSE	FALSE	neuroblastoma	neuroblastoma	NB	MSS/MSI-L	R
KS-1	907313	FALSE	TRUE	FALSE	nervous_system	glioma	GBM	MSS/MSI-L	D/F12
KU-19-19	907312	FALSE	TRUE	FALSE	urogenital_system	Bladder	BLCA	MSS/MSI-L	R
KU812	907311	TRUE	TRUE	TRUE	leukemia	chronic_myeloid_leukaemia	LCML	MSS/MSI-L	R
KURAMOCHI	909975	FALSE	TRUE	TRUE	urogenital_system	ovary	UNABLE TO CLASSIFY	MSS/MSI-L	R
KY821	907300	TRUE	FALSE	FALSE	leukemia	leukemia	LAML	MSS/MSI-L	R
KYAE-1	1503368	TRUE	FALSE	FALSE	aero_dig_tract	oesophagus	ESCA	MSS/MSI-L	R
KYM-1	1240166	FALSE	TRUE	FALSE	soft_tissue	rhabdomyosarcoma		MSS/MSI-L	D/F12
KYSE-140	753573	FALSE	TRUE	TRUE	aero_dig_tract	oesophagus	ESCA	MSS/MSI-L	R
KYSE-150	907317	FALSE	TRUE	TRUE	aero_dig_tract	oesophagus	ESCA	MSS/MSI-L	R
KYSE-180	907318	FALSE	TRUE	TRUE	aero_dig_tract	oesophagus	ESCA	MSS/MSI-L	R
KYSE-220	1240167	TRUE	FALSE	FALSE	aero_dig_tract	oesophagus	ESCA	MSS/MSI-L	R
KYSE-270	907319	FALSE	TRUE	TRUE	aero_dig_tract	oesophagus	ESCA	MSS/MSI-L	R
KYSE-30	1298221	FALSE	TRUE	TRUE	aero_dig_tract	oesophagus
KYSE-410	753574	FALSE	TRUE	FALSE	aero_dig_tract	oesophagus	ESCA	MSS/MSI-L	R
KYSE-450	907320	FALSE	TRUE	TRUE	aero_dig_tract	oesophagus	ESCA	MSS/MSI-L	R
KYSE-50	1298222	TRUE	FALSE	FALSE	aero_dig_tract	oesophagus	ESCA	MSS/MSI-L	D/F12
KYSE-510	907321	FALSE	TRUE	TRUE	aero_dig_tract	oesophagus	ESCA	MSS/MSI-L	R
KYSE-520	753575	FALSE	TRUE	TRUE	aero_dig_tract	oesophagus	ESCA	MSS/MSI-L	R
KYSE-70	753576	FALSE	TRUE	TRUE	aero_dig_tract	oesophagus	ESCA	MSS/MSI-L	R
L-1236	1330935	FALSE	TRUE	FALSE	lymphoma	Hodgkin_lymphoma		MSS/MSI-L	R
L-363	924239	FALSE	TRUE	TRUE	myeloma	myeloma	MM	MSS/MSI-L	R
L-428	907322	FALSE	TRUE	FALSE	lymphoma	Hodgkin_lymphoma		MSS/MSI-L	R
L-540	907323	FALSE	TRUE	FALSE	lymphoma	Hodgkin_lymphoma		MSS/MSI-L	R
LAMA-84	907783	TRUE	TRUE	FALSE	leukemia	chronic_myeloid_leukaemia	LCML	MSS/MSI-L	R
LAN-6	949170	TRUE	FALSE	FALSE	neuroblastoma	neuroblastoma	NB	MSS/MSI-L	R
LB1047-RCC	753577	TRUE	FALSE	FALSE	kidney	kidney	KIRC	MSI-H	D/F12
LB2241-RCC	753578	TRUE	FALSE	FALSE	kidney	kidney	KIRC	MSS/MSI-L	D/F12
LB2518-MEL	753579	TRUE	FALSE	FALSE	skin	melanoma	SKCM	MSS/MSI-L	D/F12
LB373-MEL-D	753581	TRUE	FALSE	FALSE	skin	melanoma	SKCM	MSS/MSI-L	D/F12
LB647-SCLC	753582	TRUE	FALSE	FALSE	lung_SCLC	lung_small_cell_carcinoma	SCLC	MSS/MSI-L	R
LB771-HNC	753583	TRUE	FALSE	FALSE	aero_dig_tract	head and neck	HNSC	MSS/MSI-L	D/F12
LB831-BLC	753584	TRUE	FALSE	FALSE	urogenital_system	Bladder	BLCA	MSS/MSI-L	D/F12
LB996-RCC	753585	TRUE	FALSE	FALSE	kidney	kidney	KIRC	MSS/MSI-L	D/F12
LC-1-sq	1298223	TRUE	FALSE	FALSE	lung_NSCLC	lung_NSCLC_squamous_cell_carcinoma	LUSC	MSS/MSI-L	R
LC-2-ad	907786	TRUE	FALSE	FALSE	lung_NSCLC	lung_NSCLC_adenocarcinoma	LUAD	MSS/MSI-L	R
LC4-1	907787	TRUE	FALSE	FALSE	leukemia	lymphoblastic_leukemia	ALL	MSS/MSI-L	R
LCLC-103H	753586	FALSE	TRUE	TRUE	lung_NSCLC	lung_NSCLC_large cell		MSS/MSI-L	R
LCLC-97TM1	946361	FALSE	TRUE	TRUE	lung_NSCLC	lung_NSCLC_large cell		MSS/MSI-L	R
LIM1215	2162949	TRUE	FALSE	FALSE	large_intestine	large_intestine	COREAD	unknown
LK-2	687787	FALSE	TRUE	FALSE	lung_NSCLC	lung_NSCLC_squamous_cell_carcinoma	LUSC	MSS/MSI-L	R
LN-18	1240168	FALSE	TRUE	TRUE	nervous_system	glioma	GBM	MSS/MSI-L	D/F12
LN-229	1240169	FALSE	TRUE	TRUE	nervous_system	glioma	GBM	MSS/MSI-L	D/F12
LN-405	910694	TRUE	FALSE	FALSE	nervous_system	glioma	GBM	MSS/MSI-L	D/F12
LNCaP-Clone-FGC	907788	FALSE	TRUE	FALSE	urogenital_system	prostate	PRAD	MSI-H	R
LNZTA3WT4	1240170	TRUE	FALSE	FALSE	nervous_system	glioma	GBM	MSS/MSI-L	D/F12
LOU-NH91	1298226	FALSE	TRUE	TRUE	lung_NSCLC	lung_NSCLC_squamous_cell_carcinoma	LUSC	MSS/MSI-L	R
LOUCY	907789	FALSE	TRUE	FALSE	leukemia	lymphoblastic_T_cell_leukaemia	ALL	MSS/MSI-L	R
LoVo	907790	FALSE	TRUE	TRUE	large_intestine	large_intestine	COREAD	MSI-H	D/F12
LOXIMVI	905974	FALSE	TRUE	TRUE	skin	melanoma	SKCM	MSS/MSI-L	R
LP-1	907791	FALSE	TRUE	TRUE	myeloma	myeloma	MM	MSS/MSI-L	D/F12
LS-1034	917486	FALSE	TRUE	TRUE	large_intestine	large_intestine	COREAD	MSS/MSI-L	R
LS-123	907792	FALSE	TRUE	FALSE	large_intestine	large_intestine	COREAD	MSS/MSI-L	D/F12
LS-180	998189	TRUE	TRUE	TRUE	large_intestine	large_intestine	COREAD	MSI-H	D/F12
LS-411N	907794	FALSE	TRUE	FALSE	large_intestine	large_intestine	COREAD	MSI-H	R
LS-513	907795	TRUE	TRUE	FALSE	large_intestine	large_intestine	COREAD	MSS/MSI-L	R
LU-134-A	753588	TRUE	FALSE	FALSE	lung_SCLC	lung_small_cell_carcinoma	SCLC	MSS/MSI-L	R
LU-135	713899	TRUE	FALSE	FALSE	lung_SCLC	lung_small_cell_carcinoma	SCLC	MSS/MSI-L	R
LU-139	713878	TRUE	FALSE	FALSE	lung_SCLC	lung_small_cell_carcinoma	SCLC	MSS/MSI-L	R
LU-165	753589	TRUE	FALSE	FALSE	lung_SCLC	lung_small_cell_carcinoma	SCLC	MSS/MSI-L	R
LU-65	724863	FALSE	TRUE	FALSE	lung_NSCLC	lung_NSCLC_large cell		MSS/MSI-L	R
LXF-289	753592	FALSE	TRUE	TRUE	lung_NSCLC	lung_NSCLC_adenocarcinoma	LUAD	MSS/MSI-L	D/F12
M-07e	1330939	FALSE	TRUE	FALSE	leukemia	leukemia
M059J	949094	TRUE	FALSE	TRUE	nervous_system	glioma	GBM	MSS/MSI-L	D/F12
M14	905975	TRUE	FALSE	FALSE	skin	melanoma	SKCM	MSS/MSI-L	R
Malme-3M	905953	FALSE	TRUE	FALSE	skin	melanoma	SKCM
MC-1010	907798	TRUE	FALSE	FALSE	leukemia	acute_myeloid_leukaemia	LAML
MC-CAR	683665	TRUE	FALSE	FALSE	myeloma	haematopoietic_neoplasm other	MM	MSS/MSI-L	D/F12
MC-IXC	908118	TRUE	FALSE	FALSE	neuroblastoma	neuroblastoma	NB	MSS/MSI-L	D/F12
MC116	907799	FALSE	TRUE	TRUE	lymphoma	B_cell_lymphoma	DLBC	MSS/MSI-L	R
MCC13	1333003	TRUE	FALSE	FALSE	skin	Merkel_cell_carcinoma
MCC26	1298234	TRUE	FALSE	FALSE	skin	Merkel_cell_carcinoma
MCF7	905946	FALSE	TRUE	TRUE	breast	breast	BRCA	MSS/MSI-L	D/F12
MDA-MB-134-VI	908119	FALSE	TRUE	TRUE	breast	breast
MDA-MB-157	925338	FALSE	TRUE	TRUE	breast	breast	BRCA	MSS/MSI-L	D/F12
MDA-MB-175-VII	908120	FALSE	TRUE	TRUE	breast	breast	BRCA	MSS/MSI-L	D/F12
MDA-MB-231	905960	FALSE	TRUE	FALSE	breast	breast	BRCA	MSS/MSI-L	D/F12
MDA-MB-330	1330941	TRUE	FALSE	FALSE	breast	breast	BRCA	MSS/MSI-L	D/F12
MDA-MB-361	908121	TRUE	TRUE	TRUE	breast	breast	BRCA	MSS/MSI-L	D/F12+10
MDA-MB-415	924240	FALSE	TRUE	TRUE	breast	breast	BRCA	MSS/MSI-L	D/F12
MDA-MB-436	1240172	FALSE	TRUE	TRUE	breast	breast	BRCA	MSS/MSI-L	D/F12
MDA-MB-453	908122	FALSE	TRUE	TRUE	breast	breast	BRCA	MSS/MSI-L	D/F12
MDA-MB-468	908123	FALSE	TRUE	TRUE	breast	breast	BRCA	MSS/MSI-L	D/F12
MDA-PCa-2b	1330940	FALSE	TRUE	FALSE	urogenital_system	prostate
MDST8	1240173	TRUE	TRUE	TRUE	large_intestine	large_intestine	COREAD	MSS/MSI-L	R
ME-1	1330942	FALSE	TRUE	FALSE	leukemia	acute_myeloid_leukaemia	LAML	MSS/MSI-L	R
ME-180	687514	TRUE	FALSE	TRUE	urogenital_system	cervix	CESC	MSS/MSI-L	D/F12
MEG-01	908126	FALSE	TRUE	FALSE	leukemia	chronic_myeloid_leukaemia	LCML	MSS/MSI-L	R
MEL-HO	908124	FALSE	TRUE	TRUE	skin	melanoma	SKCM	MSS/MSI-L	R
MEL-JUSO	908125	FALSE	TRUE	FALSE	skin	melanoma	SKCM	MSS/MSI-L	R
MES-SA	908127	FALSE	TRUE	FALSE	urogenital_system	uterus		MSS/MSI-L	R
Mewo	908128	FALSE	TRUE	TRUE	skin	melanoma	SKCM	MSS/MSI-L	R
MFE-280	908129	FALSE	TRUE	FALSE	urogenital_system	endometrium	UCEC	MSS/MSI-L	D/F12
MFE-296	908130	FALSE	TRUE	FALSE	urogenital_system	endometrium	UCEC	MSI-H	D/F12
MFE-319	1240174	FALSE	TRUE	FALSE	urogenital_system	endometrium	UCEC	MSI-H	D/F12
MFH-ino	925343	TRUE	FALSE	FALSE	soft_tissue	soft_tissue_other		MSS/MSI-L	D/F12
MFM-223	910948	TRUE	FALSE	TRUE	breast	breast	BRCA	MSS/MSI-L	D/F12
MG-63	908131	FALSE	TRUE	TRUE	bone	osteosarcoma		MSS/MSI-L	D/F12
MHH-CALL-2	908132	FALSE	TRUE	FALSE	leukemia	B_cell_leukemia		MSS/MSI-L	R
MHH-CALL-4	908133	FALSE	TRUE	FALSE	leukemia	B_cell_leukemia		MSS/MSI-L	R
MHH-ES-1	908134	FALSE	TRUE	TRUE	bone	ewings_sarcoma		MSS/MSI-L	R
MHH-NB-11	908135	FALSE	TRUE	TRUE	neuroblastoma	neuroblastoma	NB	MSS/MSI-L	R
MHH-PREB-1	908136	TRUE	FALSE	TRUE	leukemia	B_cell_leukemia		MSI-H	R
MIA-PaCa-2	724870	FALSE	TRUE	TRUE	pancreas	pancreas	PAAD	MSS/MSI-L	D/F12
MJ	908137	FALSE	TRUE	FALSE	lymphoma	lymphoid_neoplasm other
MKN1	908138	FALSE	TRUE	TRUE	digestive_system	stomach		MSS/MSI-L	R
MKN28	908139	TRUE	FALSE	FALSE	digestive_system	stomach	STAD	MSS/MSI-L	R
MKN45	925340	FALSE	TRUE	TRUE	digestive_system	stomach	STAD	MSS/MSI-L	R
MKN7	924250	FALSE	TRUE	TRUE	digestive_system	stomach	STAD	MSS/MSI-L	R
ML-1	1240178	FALSE	TRUE	FALSE	thyroid	thyroid	THCA	MSS/MSI-L	D/F12
ML-2	908141	TRUE	FALSE	TRUE	leukemia	acute_myeloid_leukaemia	LAML	MSS/MSI-L	R
MLMA	908142	TRUE	FALSE	FALSE	leukemia	hairy_cell_leukaemia		MSS/MSI-L	R
MM1S	1659818	FALSE	TRUE	TRUE	myeloma	myeloma	MM	MSS/MSI-L	R
MMAC-SF	925339	TRUE	FALSE	FALSE	skin	melanoma	SKCM	MSS/MSI-L	D/F12
MN-60	908143	TRUE	FALSE	FALSE	leukemia	B_cell_leukemia		MSI-H	D/F12
Mo-T	908149	TRUE	FALSE	FALSE	leukemia	hairy_cell_leukaemia		MSS/MSI-L	D/F12
MOG-G-CCM	908144	TRUE	FALSE	FALSE	nervous_system	glioma	LGG	MSS/MSI-L	D/F12
MOG-G-UVW	908145	TRUE	FALSE	FALSE	nervous_system	glioma	LGG	MSS/MSI-L	D/F12
MOLM-13	1330947	FALSE	TRUE	FALSE	leukemia	acute_myeloid_leukaemia	LAML	MSS/MSI-L	R
MOLM-16	1330948	FALSE	TRUE	TRUE	leukemia	acute_myeloid_leukaemia	LAML		R
MOLP-8	1330950	FALSE	TRUE	TRUE	myeloma	myeloma	MM	MSS/MSI-L	R
MOLT-13	908146	FALSE	TRUE	FALSE	leukemia	lymphoblastic_T_cell_leukaemia	ALL	MSI-H	R
MOLT-16	908147	FALSE	TRUE	FALSE	leukemia	lymphoblastic_T_cell_leukaemia	ALL	MSS/MSI-L	R
MOLT-4	905958	TRUE	FALSE	FALSE	leukemia	lymphoblastic_leukemia	ALL	MSI-H	R
MONO-MAC-6	908148	FALSE	TRUE	FALSE	leukemia	acute_myeloid_leukaemia	LAML	MSS/MSI-L	R
MPP-89	908150	FALSE	TRUE	FALSE	lung	mesothelioma	MESO	MSS/MSI-L	D/F12
MRK-nu-1	908151	TRUE	FALSE	FALSE	breast	breast	BRCA	MSS/MSI-L	D/F12
MS-1	753594	TRUE	FALSE	FALSE	lung_SCLC	lung_small_cell_carcinoma	SCLC	MSS/MSI-L	R+10
MS751	1240179	TRUE	FALSE	TRUE	urogenital_system	cervix	CESC	MSS/MSI-L	D/F12
MSTO-211H	908152	FALSE	TRUE	FALSE	lung	mesothelioma	MESO	MSS/MSI-L	R+10
MUTZ-3	1330958	FALSE	TRUE	FALSE	leukemia	acute_myeloid_leukaemia	LAML
MV-4-11	908156	FALSE	TRUE	TRUE	leukemia	leukemia		MSS/MSI-L	D/F12
MY-M12	1330960	TRUE	FALSE	FALSE	leukemia	leukemia	ALL	MSS/MSI-L	R
MZ1-PC	753595	TRUE	FALSE	FALSE	pancreas	pancreas	PAAD	MSS/MSI-L	R
MZ2-MEL	971777	TRUE	FALSE	FALSE	skin	melanoma	SKCM	MSS/MSI-L	D/F12
MZ7-mel	753596	TRUE	FALSE	FALSE	skin	melanoma	SKCM	MSS/MSI-L	R
NALM-1	908157	FALSE	TRUE	FALSE	leukemia	chronic_myeloid_leukaemia	LCML
NALM-6	908158	FALSE	TRUE	TRUE	leukemia	B_cell_leukemia		MSI-H	R
NAMALWA	908159	FALSE	TRUE	TRUE	lymphoma	Burkitt_lymphoma		MSS/MSI-L	R
NB(TU)1-10	1240181	TRUE	FALSE	FALSE	neuroblastoma	neuroblastoma	NB	MSS/MSI-L	R
NB1	949179	FALSE	TRUE	FALSE	neuroblastoma	neuroblastoma	NB	MSS/MSI-L	R
NB10	949171	TRUE	FALSE	FALSE	neuroblastoma	neuroblastoma	NB	MSS/MSI-L	D/F12
NB12	949172	TRUE	FALSE	FALSE	neuroblastoma	neuroblastoma	NB	MSS/MSI-L	D/F12
NB13	949177	TRUE	FALSE	FALSE	neuroblastoma	neuroblastoma	NB	MSS/MSI-L	D/F12
NB14	949178	TRUE	FALSE	FALSE	neuroblastoma	neuroblastoma	NB	MSS/MSI-L	D/F12
NB17	949175	TRUE	FALSE	FALSE	neuroblastoma	neuroblastoma	NB	MSS/MSI-L	D/F12
NB4	1323913	FALSE	TRUE	FALSE	leukemia	acute_myeloid_leukaemia	LAML	MSS/MSI-L	R
NB5	949176	TRUE	FALSE	FALSE	neuroblastoma	neuroblastoma	NB	MSS/MSI-L	D/F12
NB6	949173	TRUE	FALSE	FALSE	neuroblastoma	neuroblastoma	NB	MSS/MSI-L	D/F12
NB69	908440	TRUE	FALSE	FALSE	neuroblastoma	neuroblastoma	NB	MSS/MSI-L	D/F12
NB7	949174	TRUE	FALSE	FALSE	neuroblastoma	neuroblastoma	NB	MSS/MSI-L	D/F12
NBsusSR	925342	TRUE	FALSE	FALSE	neuroblastoma	neuroblastoma	NB
NCC010	1509073	TRUE	FALSE	FALSE	kidney	kidney	KIRC	MSS/MSI-L	R
NCC021	1509074	TRUE	FALSE	FALSE	kidney	kidney	KIRC	MSS/MSI-L	D/F12
NCCIT	908441	TRUE	FALSE	FALSE	urogenital_system	testis		MSS/MSI-L	R
NCI-H1048	687995	FALSE	TRUE	FALSE	lung_SCLC	lung_small_cell_carcinoma	SCLC	MSI-H	D/F12
NCI-H1092	687997	FALSE	TRUE	TRUE	lung_SCLC	lung_small_cell_carcinoma	SCLC	MSS/MSI-L	D/F12
NCI-H1105	908468	FALSE	TRUE	FALSE	lung_SCLC	lung_small_cell_carcinoma	SCLC	MSS/MSI-L	D/F12
NCI-H1155	908467	FALSE	TRUE	TRUE	lung_NSCLC	lung_NSCLC_large cell		MSS/MSI-L	D/F12
NCI-H1184	688000	FALSE	TRUE	FALSE	lung_SCLC	lung_small_cell_carcinoma	SCLC
NCI-H128	753597	TRUE	FALSE	FALSE	lung_SCLC	lung_small_cell_carcinoma	SCLC	MSS/MSI-L	R+10
NCI-H1299	724831	FALSE	TRUE	TRUE	lung_NSCLC	lung_NSCLC_large cell		MSS/MSI-L	R
NCI-H1304	753599	TRUE	FALSE	FALSE	lung_SCLC	lung_small_cell_carcinoma	SCLC	MSS/MSI-L	D/F12
NCI-H1341	1330964	FALSE	TRUE	FALSE	lung_SCLC	lung_small_cell_carcinoma	SCLC	MSS/MSI-L	D/F12
NCI-H1355	724866	FALSE	TRUE	TRUE	lung_NSCLC	lung_NSCLC_adenocarcinoma	LUAD	MSS/MSI-L	D/F12
NCI-H1385	1330965	FALSE	TRUE	FALSE	lung_NSCLC	lung_NSCLC_squamous_cell_carcinoma	LUSC
NCI-H1395	684681	FALSE	TRUE	TRUE	lung_NSCLC	lung_NSCLC_adenocarcinoma	LUAD	MSS/MSI-L	R
NCI-H1417	688001	TRUE	FALSE	FALSE	lung_SCLC	lung_small_cell_carcinoma	SCLC	MSS/MSI-L	R+10
NCI-H1435	1298347	FALSE	TRUE	FALSE	lung_NSCLC	lung_NSCLC_adenocarcinoma	LUAD	MSS/MSI-L	D/F12
NCI-H1436	908469	FALSE	TRUE	FALSE	lung_SCLC	lung_small_cell_carcinoma	SCLC	MSS/MSI-L	D/F12
NCI-H1437	687794	FALSE	TRUE	TRUE	lung_NSCLC	lung_NSCLC_adenocarcinoma	LUAD	MSS/MSI-L	R
NCI-H146	910899	FALSE	TRUE	TRUE	lung_SCLC	lung_small_cell_carcinoma	SCLC	MSS/MSI-L	R+10
NCI-H1563	753600	FALSE	TRUE	FALSE	lung_NSCLC	lung_NSCLC_adenocarcinoma	LUAD	MSS/MSI-L	R
NCI-H1568	1298348	FALSE	TRUE	TRUE	lung_NSCLC	lung_NSCLC_adenocarcinoma	LUAD	MSS/MSI-L	R
NCI-H1573	908472	FALSE	TRUE	TRUE	lung_NSCLC	lung_NSCLC_adenocarcinoma	LUAD	MSS/MSI-L	D/F12
NCI-H1581	908471	FALSE	TRUE	TRUE	lung_NSCLC	lung_NSCLC_large cell		MSS/MSI-L	D/F12
NCI-H1618	753601	FALSE	TRUE	FALSE	lung_SCLC	lung_small_cell_carcinoma	SCLC
NCI-H1623	687798	FALSE	TRUE	TRUE	lung_NSCLC	lung_NSCLC_adenocarcinoma	LUAD	MSS/MSI-L	D/F12
NCI-H1648	687799	FALSE	TRUE	TRUE	lung_NSCLC	lung_NSCLC_adenocarcinoma	LUAD	MSS/MSI-L	D/F12
NCI-H1650	687800	FALSE	TRUE	TRUE	lung_NSCLC	lung_NSCLC_adenocarcinoma	LUAD	MSS/MSI-L	R
NCI-H1651	910900	FALSE	TRUE	TRUE	lung_NSCLC	lung_NSCLC_adenocarcinoma	LUAD	MSS/MSI-L	D/F12
NCI-H1666	908473	FALSE	TRUE	FALSE	lung_NSCLC	lung_NSCLC_adenocarcinoma	LUAD	MSS/MSI-L	D/F12
NCI-H1688	1298349	TRUE	FALSE	FALSE	lung_SCLC	lung_small_cell_carcinoma	SCLC	MSS/MSI-L	R
NCI-H1693	687802	FALSE	TRUE	TRUE	lung_NSCLC	lung_NSCLC_adenocarcinoma	LUAD	MSS/MSI-L	R+10
NCI-H1694	688006	FALSE	TRUE	FALSE	lung_SCLC	lung_small_cell_carcinoma	SCLC	MSS/MSI-L	H
NCI-H1703	908474	FALSE	TRUE	TRUE	lung_NSCLC	lung_NSCLC_adenocarcinoma	LUAD	MSS/MSI-L	R
NCI-H1734	722058	FALSE	TRUE	TRUE	lung_NSCLC	lung_NSCLC_adenocarcinoma	LUAD	MSS/MSI-L	R
NCI-H1755	908475	FALSE	TRUE	FALSE	lung_NSCLC	lung_NSCLC_adenocarcinoma	LUAD	MSS/MSI-L	R
NCI-H1770	687804	TRUE	FALSE	TRUE	lung_NSCLC	lung_NSCLC_not specified	UNABLE TO CLASSIFY	MSS/MSI-L	D/F12
NCI-H1781	1298350	FALSE	TRUE	TRUE	lung_NSCLC	lung_NSCLC_adenocarcinoma	LUAD	MSS/MSI-L	R
NCI-H1792	724868	FALSE	TRUE	TRUE	lung_NSCLC	lung_NSCLC_adenocarcinoma	LUAD	MSS/MSI-L	R
NCI-H1793	908463	FALSE	TRUE	TRUE	lung_NSCLC	lung_NSCLC_adenocarcinoma	LUAD	MSS/MSI-L	D/F12
NCI-H1836	1240182	TRUE	FALSE	FALSE	lung_SCLC	lung_small_cell_carcinoma	SCLC	MSS/MSI-L	D/F12
NCI-H1838	687807	FALSE	TRUE	TRUE	lung_NSCLC	lung_NSCLC_adenocarcinoma	LUAD	MSS/MSI-L	R
NCI-H1869	1240183	FALSE	TRUE	TRUE	lung_NSCLC	lung_NSCLC_squamous_cell_carcinoma	LUSC	MSS/MSI-L	D/F12
NCI-H187	688007	TRUE	FALSE	TRUE	lung_SCLC	lung_small_cell_carcinoma	SCLC	MSS/MSI-L	R+10
NCI-H1876	1330972	FALSE	TRUE	FALSE	lung_SCLC	lung_small_cell_carcinoma	SCLC	MSS/MSI-L	H
NCI-H1915	1240184	FALSE	TRUE	TRUE	lung_NSCLC	lung_NSCLC_large cell		MSS/MSI-L	R
NCI-H1930	924245	FALSE	TRUE	TRUE	lung_SCLC	lung_small_cell_carcinoma	SCLC
NCI-H1944	1240185	FALSE	TRUE	TRUE	lung_NSCLC	lung_NSCLC_adenocarcinoma	LUAD	MSS/MSI-L	D/F12
NCI-H196	1240186	FALSE	TRUE	TRUE	lung_SCLC	lung_small_cell_carcinoma	SCLC	MSS/MSI-L	R
NCI-H1963	688010	FALSE	TRUE	FALSE	lung_SCLC	lung_small_cell_carcinoma	SCLC	MSS/MSI-L	R
NCI-H1975	924244	FALSE	TRUE	TRUE	lung_NSCLC	lung_NSCLC_adenocarcinoma	LUAD	MSS/MSI-L	R
NCI-H1993	908476	TRUE	FALSE	FALSE	lung_NSCLC	lung_NSCLC_adenocarcinoma	LUAD	MSS/MSI-L	R
NCI-H2009	724873	FALSE	TRUE	TRUE	lung_NSCLC	lung_NSCLC_adenocarcinoma	LUAD	MSS/MSI-L	D/F12
NCI-H2023	1240187	FALSE	TRUE	TRUE	lung_NSCLC	lung_NSCLC_adenocarcinoma	LUAD	MSS/MSI-L	R
NCI-H2029	688011	FALSE	TRUE	FALSE	lung_SCLC	lung_small_cell_carcinoma	SCLC	MSS/MSI-L	D/F12
NCI-H2030	722045	FALSE	TRUE	TRUE	lung_NSCLC	lung_NSCLC_adenocarcinoma	LUAD	MSS/MSI-L	R
NCI-H2052	688058	FALSE	TRUE	TRUE	lung	mesothelioma	MESO	MSS/MSI-L	R
NCI-H2066	1330973	FALSE	TRUE	FALSE	lung_SCLC	lung_small_cell_carcinoma	SCLC	MSS/MSI-L	D/F12
NCI-H2081	908480	FALSE	TRUE	TRUE	lung_SCLC	lung_small_cell_carcinoma	SCLC	MSS/MSI-L	H
NCI-H2085	687812	FALSE	TRUE	FALSE	lung_NSCLC	lung_NSCLC_adenocarcinoma	LUAD	MSS/MSI-L	D/F12
NCI-H2087	724834	FALSE	TRUE	FALSE	lung_NSCLC	lung_NSCLC_adenocarcinoma	LUAD	MSS/MSI-L	D/F12
NCI-H209	688013	FALSE	TRUE	TRUE	lung_SCLC	lung_small_cell_carcinoma	SCLC	MSS/MSI-L	R+10
NCI-H2106	908479	FALSE	TRUE	TRUE	lung_NSCLC	lung_NSCLC_not specified
NCI-H211	1240189	FALSE	TRUE	FALSE	lung_SCLC	lung_small_cell_carcinoma	SCLC	MSS/MSI-L	R+10
NCI-H2110	1298351	FALSE	TRUE	TRUE	lung_NSCLC	lung_NSCLC_not specified	UNABLE TO CLASSIFY	MSS/MSI-L	R
NCI-H2122	722046	FALSE	TRUE	TRUE	lung_NSCLC	lung_NSCLC_adenocarcinoma	LUAD	MSS/MSI-L	R
NCI-H2126	687814	FALSE	TRUE	TRUE	lung_NSCLC	lung_NSCLC_adenocarcinoma	LUAD
NCI-H2135	1298352	TRUE	FALSE	TRUE	lung_NSCLC	lung_NSCLC_not specified	UNABLE TO CLASSIFY	MSS/MSI-L	D/F12
NCI-H2141	688014	TRUE	FALSE	FALSE	lung_SCLC	lung_small_cell_carcinoma	SCLC	MSS/MSI-L	D/F12
NCI-H2170	687815	FALSE	TRUE	TRUE	lung_NSCLC	lung_NSCLC_squamous_cell_carcinoma	LUSC	MSS/MSI-L	R
NCI-H2171	688015	FALSE	TRUE	TRUE	lung_SCLC	lung_small_cell_carcinoma	SCLC	MSS/MSI-L	H
NCI-H2172	1298353	FALSE	TRUE	TRUE	lung_NSCLC	lung_NSCLC_not specified	UNABLE TO CLASSIFY	MSS/MSI-L	R
NCI-H2196	908481	FALSE	TRUE	TRUE	lung_SCLC	lung_small_cell_carcinoma	SCLC	MSS/MSI-L	R
NCI-H2227	688018	FALSE	TRUE	FALSE	lung_SCLC	lung_small_cell_carcinoma	SCLC	MSS/MSI-L	R
NCI-H2228	687816	FALSE	TRUE	TRUE	lung_NSCLC	lung_NSCLC_adenocarcinoma	LUAD	MSS/MSI-L	R
NCI-H226	905941	FALSE	TRUE	TRUE	lung_NSCLC	lung_NSCLC_squamous_cell_carcinoma	LUSC	MSS/MSI-L	R
NCI-H2286	1298355	FALSE	TRUE	FALSE	lung_SCLC	lung_small_cell_carcinoma	SCLC
NCI-H2291	724874	FALSE	TRUE	FALSE	lung_NSCLC	lung_NSCLC_adenocarcinoma	LUAD	MSS/MSI-L	R
NCI-H23	905942	FALSE	TRUE	FALSE	lung_NSCLC	lung_NSCLC_adenocarcinoma	LUAD	MSS/MSI-L	R
NCI-H2342	687819	FALSE	TRUE	FALSE	lung_NSCLC	lung_NSCLC_adenocarcinoma	LUAD	MSS/MSI-L	D/F12
NCI-H2347	687820	FALSE	TRUE	TRUE	lung_NSCLC	lung_NSCLC_adenocarcinoma	LUAD	MSS/MSI-L	R
NCI-H2405	687821	FALSE	TRUE	FALSE	lung_NSCLC	lung_NSCLC_adenocarcinoma	LUAD	MSS/MSI-L	D/F12
NCI-H2444	1298356	FALSE	TRUE	FALSE	lung_NSCLC	lung_NSCLC_not specified	UNABLE TO CLASSIFY	MSS/MSI-L	R
NCI-H2452	908462	FALSE	TRUE	TRUE	lung	mesothelioma	MESO	MSS/MSI-L	R
NCI-H250	924241	TRUE	FALSE	FALSE	lung_SCLC	lung_small_cell_carcinoma	SCLC	MSS/MSI-L	R+10
NCI-H28	908470	FALSE	TRUE	TRUE	lung	mesothelioma	MESO	MSS/MSI-L	R
NCI-H292	753604	FALSE	TRUE	TRUE	lung_NSCLC	lung_NSCLC_adenocarcinoma	LUAD	MSS/MSI-L	R
NCI-H3122	1240190	TRUE	FALSE	FALSE	lung_NSCLC	lung_NSCLC_adenocarcinoma	LUAD	MSS/MSI-L	R
NCI-H345	688021	TRUE	FALSE	TRUE	lung_SCLC	lung_small_cell_carcinoma	SCLC	MSS/MSI-L	D/F12
NCI-H358	908465	FALSE	TRUE	TRUE	lung_NSCLC	lung_NSCLC_adenocarcinoma	LUAD	MSS/MSI-L	R
NCI-H378	688022	TRUE	FALSE	FALSE	lung_SCLC	lung_small_cell_carcinoma	SCLC	MSS/MSI-L	R+10
NCI-H441	908460	FALSE	TRUE	TRUE	lung_NSCLC	lung_NSCLC_adenocarcinoma	LUAD	MSS/MSI-L	R
NCI-H446	688023	FALSE	TRUE	TRUE	lung_SCLC	lung_small_cell_carcinoma	SCLC	MSS/MSI-L	R+10
NCI-H460	905943	FALSE	TRUE	TRUE	lung_NSCLC	lung_NSCLC_large cell		MSS/MSI-L	R
NCI-H508	908442	FALSE	TRUE	FALSE	large_intestine	large_intestine	COREAD	MSS/MSI-L	R
NCI-H510A	753605	TRUE	TRUE	TRUE	lung_SCLC	lung_small_cell_carcinoma	SCLC	MSS/MSI-L	D/F12
NCI-H520	908443	FALSE	TRUE	TRUE	lung_NSCLC	lung_NSCLC_squamous_cell_carcinoma	LUSC	MSS/MSI-L	R
NCI-H522	905944	FALSE	TRUE	TRUE	lung_NSCLC	lung_NSCLC_adenocarcinoma	LUAD	MSS/MSI-L	R
NCI-H524	908483	FALSE	TRUE	FALSE	lung_SCLC	lung_small_cell_carcinoma	SCLC	MSS/MSI-L	R+10
NCI-H526	688025	FALSE	TRUE	FALSE	lung_SCLC	lung_small_cell_carcinoma	SCLC	MSS/MSI-L	R+10
NCI-H596	908459	FALSE	TRUE	TRUE	lung_NSCLC	lung_NSCLC_adenocarcinoma	LUAD	MSS/MSI-L	R
NCI-H630	908482	TRUE	FALSE	FALSE	large_intestine	large_intestine	COREAD	MSI-H	D/F12
NCI-H64	688026	TRUE	FALSE	FALSE	lung_SCLC	lung_small_cell_carcinoma	SCLC	MSS/MSI-L	R
NCI-H647	1240191	FALSE	TRUE	FALSE	lung_NSCLC	lung_NSCLC_not specified		MSS/MSI-L	R
NCI-H650	722066	FALSE	TRUE	TRUE	lung_NSCLC	lung_NSCLC_adenocarcinoma	LUAD	MSS/MSI-L	D/F12
NCI-H660	1330975	FALSE	TRUE	FALSE	urogenital_system	prostate		MSS/MSI-L	D/F12
NCI-H661	687829	TRUE	TRUE	FALSE	lung_NSCLC	lung_NSCLC_large cell		MSS/MSI-L	R
NCI-H69	688027	FALSE	TRUE	FALSE	lung_SCLC	lung_small_cell_carcinoma	SCLC	MSS/MSI-L	R+10
NCI-H716	908458	FALSE	TRUE	TRUE	large_intestine	large_intestine	COREAD	MSS/MSI-L	R
NCI-H720	687600	TRUE	FALSE	FALSE	lung_NSCLC	lung_NSCLC_carcinoid		MSS/MSI-L	D/F12
NCI-H727	724855	FALSE	TRUE	TRUE	lung_NSCLC	lung_NSCLC_carcinoid		MSS/MSI-L	R
NCI-H740	1331055	TRUE	FALSE	FALSE	lung_SCLC	lung_small_cell_carcinoma	SCLC	MSS/MSI-L	R
NCI-H747	908457	FALSE	TRUE	FALSE	large_intestine	large_intestine	COREAD	MSS/MSI-L	R
NCI-H748	909194	TRUE	FALSE	FALSE	lung_SCLC	lung_small_cell_carcinoma	SCLC	MSS/MSI-L	R+10
NCI-H810	925341	FALSE	TRUE	TRUE	lung_NSCLC	lung_NSCLC_large cell		MSS/MSI-L	D/F12
NCI-H82	688031	FALSE	TRUE	TRUE	lung_SCLC	lung_small_cell_carcinoma	SCLC	MSS/MSI-L	R+10
NCI-H820	1333019	FALSE	FALSE	TRUE	lung_NSCLC	lung_NSCLC_papillary
NCI-H835	753607	TRUE	FALSE	FALSE	lung_NSCLC	lung_NSCLC_carcinoid		MSS/MSI-L	R
NCI-H838	910399	FALSE	TRUE	FALSE	lung_NSCLC	lung_NSCLC_adenocarcinoma	LUAD	MSS/MSI-L	R
NCI-H841	1240192	FALSE	TRUE	FALSE	lung_SCLC	lung_small_cell_carcinoma	SCLC	MSS/MSI-L	D/F12
NCI-H847	1240193	TRUE	FALSE	TRUE	lung_SCLC	lung_small_cell_carcinoma	SCLC	MSS/MSI-L	D/F12
NCI-H920	1330978	FALSE	FALSE	TRUE	lung_NSCLC	lung_NSCLC_adenocarcinoma	LUAD
NCI-H929	724825	FALSE	TRUE	TRUE	myeloma	myeloma	MM	MSS/MSI-L	R
NCI-N417	688033	FALSE	FALSE	TRUE	lung_SCLC	lung_small_cell_carcinoma	SCLC
NCI-N87	908461	FALSE	TRUE	TRUE	digestive_system	stomach	STAD	MSS/MSI-L	R
NCI-SNU-1	908444	TRUE	TRUE	TRUE	digestive_system	stomach	STAD	MSI-H	R
NCI-SNU-16	908446	TRUE	TRUE	TRUE	digestive_system	stomach	STAD	MSS/MSI-L	R
NCI-SNU-5	908445	FALSE	TRUE	TRUE	digestive_system	stomach	STAD	MSS/MSI-L	D/F12
NEC8	910942	TRUE	FALSE	FALSE	urogenital_system	testis		MSS/MSI-L	R
NH-12	908447	TRUE	FALSE	FALSE	neuroblastoma	neuroblastoma	NB	MSS/MSI-L	D/F12
NH-6	925344	FALSE	TRUE	FALSE	neuroblastoma	neuroblastoma
NKM-1	908448	TRUE	FALSE	FALSE	leukemia	acute_myeloid_leukaemia	LAML	MSS/MSI-L	R
NMC-G1	908449	FALSE	TRUE	FALSE	nervous_system	glioma	LGG	MSS/MSI-L	D/F12
no-10	908452	TRUE	FALSE	FALSE	nervous_system	glioma	LGG	MSS/MSI-L	D/F12
no-11	908450	TRUE	FALSE	FALSE	nervous_system	glioma	LGG	MSS/MSI-L	D/F12
NOMO-1	908451	FALSE	TRUE	FALSE	leukemia	acute_myeloid_leukaemia	LAML	MSS/MSI-L	R
NOS-1	925345	TRUE	FALSE	FALSE	bone	osteosarcoma		MSS/MSI-L	R
NTERA-2-cl-D1	908454	TRUE	FALSE	FALSE	urogenital_system	testis		MSS/MSI-L	D/F12
NU-DUL-1	1330982	FALSE	TRUE	TRUE	lymphoma	B_cell_lymphoma	DLBC	MSS/MSI-L	R
NUGC-2	1240194	FALSE	TRUE	TRUE	digestive_system	stomach
NUGC-3	908455	FALSE	TRUE	TRUE	digestive_system	stomach	STAD	MSI-H	R
NUGC-4	1298357	FALSE	TRUE	FALSE	digestive_system	stomach	STAD	MSS/MSI-L	R
NY	910849	TRUE	FALSE	FALSE	bone	osteosarcoma		MSS/MSI-L	D/F12
OACM5-1	1503363	TRUE	FALSE	FALSE	aero_dig_tract	oesophagus	ESCA	MSS/MSI-L	R
OACp4C	1503362	TRUE	FALSE	FALSE	aero_dig_tract	oesophagus	ESCA	MSS/MSI-L	R
OAW-28	946360	FALSE	TRUE	TRUE	urogenital_system	ovary	OV	MSS/MSI-L	D/F12
OAW-42	910548	FALSE	TRUE	TRUE	urogenital_system	ovary	OV	MSS/MSI-L	D/F12
OC-314	909257	FALSE	TRUE	FALSE	urogenital_system	ovary	OV	MSI-H	R
OCI-AML2	910947	FALSE	TRUE	TRUE	leukemia	acute_myeloid_leukaemia	LAML	MSS/MSI-L	D/F12
OCI-AML3	1290455	FALSE	TRUE	TRUE	leukemia	acute_myeloid_leukaemia	LAML	MSS/MSI-L	R
OCI-AML5	1330983	FALSE	TRUE	TRUE	leukemia	acute_myeloid_leukaemia	LAML	MSS/MSI-L	D/F12
OCI-LY-19	1330984	FALSE	TRUE	TRUE	lymphoma	B_cell_lymphoma	DLBC	MSS/MSI-L	D/F12
OCI-LY7	1659819	TRUE	FALSE	TRUE	lymphoma	B_cell_lymphoma	DLBC		D/F12
OCI-M1	1330985	FALSE	TRUE	TRUE	leukemia	acute_myeloid_leukaemia	LAML	MSS/MSI-L	D/F12
OCUB-M	909256	TRUE	FALSE	FALSE	breast	breast	BRCA	MSS/MSI-L	D/F12
OCUM-1	1298358	FALSE	TRUE	TRUE	digestive_system	stomach	STAD	MSS/MSI-L	D/F12
OE19	910079	FALSE	TRUE	FALSE	aero_dig_tract	oesophagus	ESCA	MSS/MSI-L	R
OE21	1298359	FALSE	TRUE	FALSE	aero_dig_tract	oesophagus	ESCA	MSS/MSI-L	R
OE33	910549	FALSE	TRUE	FALSE	aero_dig_tract	oesophagus	ESCA	MSS/MSI-L	R
OMC-1	949154	TRUE	FALSE	FALSE	urogenital_system	cervix	CESC	MSS/MSI-L	D/F12
ONS-76	909248	FALSE	TRUE	FALSE	nervous_system	medulloblastoma	MB	MSS/MSI-L	R
OPM-2	909249	FALSE	TRUE	TRUE	myeloma	myeloma	MM	MSS/MSI-L	R
OS-RC-2	909250	FALSE	TRUE	FALSE	kidney	kidney	KIRC	MSS/MSI-L	R
OSC-19	1298362	TRUE	FALSE	FALSE	aero_dig_tract	head and neck	HNSC	MSS/MSI-L	D/F12
OSC-20	1240196	TRUE	FALSE	FALSE	aero_dig_tract	head and neck	HNSC	MSS/MSI-L	D/F12
OUMS-23	1298363	FALSE	TRUE	TRUE	large_intestine	large_intestine
OV-17R	1480361	TRUE	FALSE	FALSE	urogenital_system	ovary	OV	MSS/MSI-L	D/F12
OV-56	1480362	FALSE	TRUE	FALSE	urogenital_system	ovary	OV	MSS/MSI-L	D/F12
OV-7	1480360	FALSE	TRUE	FALSE	urogenital_system	ovary	OV	MSS/MSI-L	D/F12
OV-90	1240197	FALSE	TRUE	TRUE	urogenital_system	ovary	OV	MSS/MSI-L	D/F12
OVCA420	1480364	TRUE	FALSE	FALSE	urogenital_system	ovary	OV	MSS/MSI-L	D/F12
OVCA432	1480366	FALSE	FALSE	TRUE	urogenital_system	ovary
OVCA433	1480367	TRUE	FALSE	FALSE	urogenital_system	ovary	OV	MSS/MSI-L	D/F12
OVCAR-3	905933	FALSE	TRUE	FALSE	urogenital_system	ovary	OV	MSS/MSI-L	R
OVCAR-4	905990	FALSE	TRUE	TRUE	urogenital_system	ovary	OV	MSS/MSI-L	R
OVCAR-5	905969	TRUE	FALSE	TRUE	urogenital_system	ovary	OV	MSS/MSI-L	R
OVCAR-8	905991	FALSE	TRUE	TRUE	urogenital_system	ovary	OV	MSS/MSI-L	R
OVISE	1240198	FALSE	TRUE	TRUE	urogenital_system	ovary	OV	MSS/MSI-L	R
OVK-18	1480371	FALSE	TRUE	FALSE	urogenital_system	ovary	OV	MSI-H	D/F12
OVKATE	1240199	TRUE	FALSE	TRUE	urogenital_system	ovary	OV	MSS/MSI-L	R
OVMANA	1333023	FALSE	TRUE	TRUE	urogenital_system	ovary
OVMIU	1240200	TRUE	FALSE	FALSE	urogenital_system	ovary	OV	MSS/MSI-L	R
OVTOKO	1298365	FALSE	TRUE	TRUE	urogenital_system	ovary	OV	MSS/MSI-L	R
P12-ICHIKAWA	909251	FALSE	TRUE	FALSE	leukemia	lymphoblastic_T_cell_leukaemia	ALL	MSS/MSI-L	R
P30-OHK	909252	TRUE	FALSE	FALSE	leukemia	lymphoblastic_leukemia	ALL	MSI-H	R
P32-ISH	1330987	TRUE	FALSE	FALSE	lymphoma	Burkitt_lymphoma		MSS/MSI-L	R
P3HR-1	1330988	FALSE	TRUE	FALSE	lymphoma	Burkitt_lymphoma
PA-1	909255	TRUE	FALSE	TRUE	urogenital_system	ovary		MSS/MSI-L	D/F12
PA-TU-8902	1298526	FALSE	TRUE	FALSE	pancreas	pancreas	PAAD	MSS/MSI-L	D/F12
PA-TU-8988S	1298527	FALSE	TRUE	TRUE	pancreas	pancreas
PA-TU-8988T	1240201	FALSE	TRUE	FALSE	pancreas	pancreas	PAAD	MSS/MSI-L	D/F12
PANC-02-03	1298475	FALSE	TRUE	TRUE	pancreas	pancreas	PAAD	MSS/MSI-L	R
PANC-02-13	1330989	FALSE	TRUE	FALSE	pancreas	pancreas
PANC-03-27	925346	FALSE	TRUE	TRUE	pancreas	pancreas	PAAD	MSS/MSI-L	R
PANC-04-03	1298476	FALSE	TRUE	TRUE	pancreas	pancreas	PAAD	MSS/MSI-L	R
PANC-08-13	925347	FALSE	TRUE	TRUE	pancreas	pancreas	PAAD	MSS/MSI-L	R
PANC-10-05	925348	FALSE	TRUE	FALSE	pancreas	pancreas	PAAD	MSS/MSI-L	R
PC-14	753608	FALSE	TRUE	FALSE	lung_NSCLC	lung_NSCLC_adenocarcinoma	LUAD	MSS/MSI-L	R
PC-3	905934	FALSE	TRUE	TRUE	urogenital_system	prostate	PRAD	MSS/MSI-L	D/F12
PCI-15A	1240204	TRUE	FALSE	FALSE	aero_dig_tract	head and neck	HNSC	MSS/MSI-L	R
PCI-30	1298529	TRUE	FALSE	FALSE	aero_dig_tract	head and neck	HNSC	MSS/MSI-L	R
PCI-38	1240205	TRUE	FALSE	FALSE	aero_dig_tract	head and neck	HNSC	MSS/MSI-L	R
PCI-4B	1298531	TRUE	FALSE	FALSE	aero_dig_tract	head and neck	HNSC	MSS/MSI-L	R
PCI-6A	1240206	TRUE	FALSE	FALSE	aero_dig_tract	head and neck	HNSC	MSS/MSI-L	R
PE-CA-PJ15	1240207	FALSE	TRUE	TRUE	aero_dig_tract	head and neck	HNSC	MSS/MSI-L	D/F12
PEO1	1480372	TRUE	FALSE	FALSE	urogenital_system	ovary	OV	MSS/MSI-L	R
PF-382	909260	FALSE	TRUE	FALSE	leukemia	lymphoblastic_T_cell_leukaemia	ALL	MSS/MSI-L	R
PFSK-1	683667	TRUE	FALSE	FALSE	nervous_system	medulloblastoma	MB	MSS/MSI-L	R
PL-21	1330991	FALSE	TRUE	TRUE	leukemia	acute_myeloid_leukaemia	LAML	MSS/MSI-L	R
PL18	1240208	TRUE	FALSE	FALSE	pancreas	pancreas	PAAD	MSS/MSI-L	D/F12
PL4	1298533	TRUE	FALSE	FALSE	pancreas	pancreas	PAAD	MSS/MSI-L	D/F12
PLC-PRF-5	925349	FALSE	TRUE	TRUE	digestive_system	liver
PSN1	910546	FALSE	TRUE	TRUE	pancreas	pancreas	PAAD	MSS/MSI-L	R
PWR-1E	1330993	TRUE	FALSE	FALSE	urogenital_system	prostate	PRAD	MSS/MSI-L	D/F12
QGP-1	1298534	FALSE	TRUE	TRUE	pancreas	pancreas		MSS/MSI-L	R
QIMR-WIL	910545	TRUE	FALSE	FALSE	leukemia	acute_myeloid_leukaemia	LAML	MSS/MSI-L	D/F12
Raji	909262	FALSE	TRUE	FALSE	lymphoma	Burkitt_lymphoma		MSS/MSI-L	R
Ramos-2G6-4C10	910401	TRUE	FALSE	FALSE	lymphoma	Burkitt_lymphoma		MSS/MSI-L	R
RC-K8	1330995	TRUE	FALSE	TRUE	lymphoma	B_cell_lymphoma	DLBC	MSS/MSI-L	R
RCC-AB	1524418	TRUE	FALSE	FALSE	kidney	kidney	KIRC	MSS/MSI-L	D/F12
RCC-ER	1524417	TRUE	FALSE	FALSE	kidney	kidney	KIRC	MSS/MSI-L	D/F12
RCC-FG2	1524414	TRUE	FALSE	FALSE	kidney	kidney	KIRC	MSS/MSI-L	D/F12
RCC-JF	1524415	TRUE	FALSE	FALSE	kidney	kidney	KIRC	MSS/MSI-L	D/F12
RCC-JW	1524416	TRUE	FALSE	FALSE	kidney	kidney	KIRC	MSS/MSI-L	D/F12
RCC-MF	1524419	TRUE	FALSE	FALSE	kidney	kidney	KIRC	MSS/MSI-L	D/F12
RCC10RGB	909974	FALSE	TRUE	FALSE	kidney	kidney	KIRC	MSS/MSI-L	D/F12
RCH-ACV	1330994	FALSE	TRUE	FALSE	leukemia	B_cell_leukemia		MSS/MSI-L	R
RCM-1	909263	FALSE	TRUE	TRUE	large_intestine	large_intestine	COREAD	MSS/MSI-L	R
RD	909264	FALSE	TRUE	FALSE	soft_tissue	rhabdomyosarcoma		MSS/MSI-L	D/F12
RD-ES	1330996	FALSE	TRUE	FALSE	bone	ewings_sarcoma
REH	909696	FALSE	TRUE	FALSE	leukemia	B_cell_leukemia		MSI-H	R
RERF-GC-1B	1240209	FALSE	TRUE	TRUE	digestive_system	stomach	STAD	MSS/MSI-L	R
RERF-LC-Ad2	1298536	FALSE	TRUE	FALSE	lung_NSCLC	lung_NSCLC_adenocarcinoma	LUAD
RERF-LC-KJ	1298537	FALSE	TRUE	TRUE	lung_NSCLC	lung_NSCLC_adenocarcinoma	LUAD	MSS/MSI-L	R
RERF-LC-MS	910931	FALSE	TRUE	TRUE	lung_NSCLC	lung_NSCLC_adenocarcinoma	LUAD	MSS/MSI-L	D/F12
RERF-LC-Sq1	1298538	FALSE	TRUE	FALSE	lung_NSCLC	lung_NSCLC_squamous_cell_carcinoma	LUSC	MSS/MSI-L	R
RF-48	909697	TRUE	FALSE	FALSE	digestive_system	stomach	STAD	MSS/MSI-L	D/F12
RH-1	971773	TRUE	FALSE	FALSE	soft_tissue	rhabdomyosarcoma		MSS/MSI-L	R
RH-18	971774	FALSE	TRUE	FALSE	soft_tissue	rhabdomyosarcoma		MSS/MSI-L	R
RH-41	1240210	FALSE	TRUE	FALSE	soft_tissue	rhabdomyosarcoma		MSS/MSI-L	R
RKN	1298539	FALSE	TRUE	TRUE	urogenital_system	ovary		MSS/MSI-L	D/F12
RKO	909698	TRUE	TRUE	TRUE	large_intestine	large_intestine	COREAD	MSI-H	D/F12
RL	910861	FALSE	TRUE	TRUE	lymphoma	B_cell_lymphoma	DLBC	MSS/MSI-L	R
RL95-2	930082	FALSE	TRUE	FALSE	urogenital_system	endometrium		MSI-H	D/F12
RMG-I	909699	FALSE	TRUE	TRUE	urogenital_system	ovary		MSS/MSI-L	D/F12
RO82-W-1	930083	TRUE	FALSE	FALSE	thyroid	thyroid	THCA	MSS/MSI-L	D/F12
ROS-50	1331025	TRUE	FALSE	FALSE	leukemia	B_cell_leukemia		MSS/MSI-L	R
RPMI-2650	909700	TRUE	FALSE	TRUE	aero_dig_tract	head and neck	HNSC	MSS/MSI-L	D/F12
RPMI-6666	909701	TRUE	FALSE	FALSE	lymphoma	Hodgkin_lymphoma		MSS/MSI-L	R
RPMI-7951	910903	FALSE	TRUE	TRUE	skin	melanoma	SKCM	MSS/MSI-L	D/F12
RPMI-8226	905964	FALSE	TRUE	TRUE	myeloma	myeloma	MM	MSS/MSI-L	R
RPMI-8402	909702	FALSE	TRUE	FALSE	leukemia	lymphoblastic_T_cell_leukaemia	ALL	MSS/MSI-L	R
RPMI-8866	910544	TRUE	FALSE	FALSE	leukemia	chronic_myeloid_leukaemia	LCML	MSS/MSI-L	R
RS4-11	909703	FALSE	TRUE	FALSE	leukemia	leukemia	ALL	MSI-H	R
RT-112	909704	FALSE	TRUE	TRUE	urogenital_system	Bladder	BLCA	MSS/MSI-L	R
RT4	687455	FALSE	TRUE	TRUE	urogenital_system	Bladder	BLCA	MSS/MSI-L	D/F12
RVH-421	909706	TRUE	FALSE	FALSE	skin	melanoma	SKCM	MSS/MSI-L	R
RXF393	905978	TRUE	FALSE	FALSE	kidney	kidney	KIRC	MSS/MSI-L	R
S-117	910946	FALSE	TRUE	FALSE	thyroid	thyroid
Saos-2	909707	FALSE	TRUE	FALSE	bone	osteosarcoma		MSS/MSI-L	R
SAS	909708	TRUE	FALSE	FALSE	aero_dig_tract	head and neck	HNSC	MSS/MSI-L	D/F12
SAT	1299050	TRUE	FALSE	FALSE	aero_dig_tract	head and neck	HNSC	MSS/MSI-L	R
SBC-1	713885	TRUE	FALSE	FALSE	lung_SCLC	lung_small_cell_carcinoma	SCLC	MSS/MSI-L	R+10
SBC-3	753610	TRUE	FALSE	FALSE	lung_SCLC	lung_small_cell_carcinoma	SCLC	MSS/MSI-L	D/F12
SBC-5	713880	FALSE	TRUE	FALSE	lung_SCLC	lung_small_cell_carcinoma	SCLC	MSS/MSI-L	D/F12
SCaBER	1299051	FALSE	TRUE	FALSE	urogenital_system	Bladder	BLCA
SCC-15	910911	FALSE	TRUE	TRUE	aero_dig_tract	head and neck	HNSC	MSS/MSI-L	D/F12
SCC-25	910701	FALSE	TRUE	TRUE	aero_dig_tract	head and neck	HNSC	MSS/MSI-L	D/F12
SCC-3	910930	TRUE	FALSE	TRUE	lymphoma	B_cell_lymphoma	DLBC	MSS/MSI-L	R
SCC-4	910904	FALSE	TRUE	FALSE	aero_dig_tract	head and neck	HNSC	MSS/MSI-L	D/F12+10
SCC-9	909709	FALSE	TRUE	TRUE	aero_dig_tract	head and neck	HNSC	MSS/MSI-L	D/F12
SCC90	1299052	TRUE	FALSE	FALSE	aero_dig_tract	head and neck	HNSC		R
SCH	909711	TRUE	FALSE	FALSE	digestive_system	stomach		MSS/MSI-L	R
Sci-1	1331030	TRUE	FALSE	FALSE	lymphoma	B_cell_lymphoma	DLBC	MSS/MSI-L
SCLC-21H	753611	FALSE	TRUE	TRUE	lung_SCLC	lung_small_cell_carcinoma	SCLC
Set2	1659820	TRUE	TRUE	TRUE	leukemia	leukemia	LAML	unknown
SF126	909712	FALSE	TRUE	FALSE	nervous_system	glioma	GBM	MSS/MSI-L	D/F12
SF268	905986	FALSE	TRUE	TRUE	nervous_system	glioma	GBM	MSS/MSI-L	R
SF295	905985	FALSE	TRUE	FALSE	nervous_system	glioma	GBM	MSS/MSI-L	D/F12
SF539	905984	FALSE	TRUE	TRUE	nervous_system	glioma	LGG	MSS/MSI-L	R
SH-4	909713	FALSE	TRUE	FALSE	skin	melanoma	SKCM	MSS/MSI-L	D/F12
SHP-77	724872	FALSE	TRUE	FALSE	lung_SCLC	lung_small_cell_carcinoma	SCLC	MSS/MSI-L	R
SIG-M5	909715	FALSE	TRUE	TRUE	leukemia	acute_myeloid_leukaemia	LAML	MSS/MSI-L	D/F12
SiHa	930297	TRUE	FALSE	TRUE	urogenital_system	cervix	CESC	MSS/MSI-L	D/F12
SIMA	753620	FALSE	TRUE	FALSE	neuroblastoma	neuroblastoma	NB	MSS/MSI-L	R
SISO	1240212	TRUE	FALSE	FALSE	urogenital_system	cervix	CESC	MSS/MSI-L	R
SJRH30	909716	TRUE	FALSE	FALSE	soft_tissue	rhabdomyosarcoma		MSS/MSI-L	R
SJSA-1	909717	FALSE	TRUE	FALSE	bone	bone_other		MSS/MSI-L	R
SK-CO-1	909718	FALSE	TRUE	TRUE	large_intestine	large_intestine	COREAD	MSS/MSI-L	R
SK-ES-1	684072	FALSE	TRUE	FALSE	bone	ewings_sarcoma		MSS/MSI-L	R
SK-GT-2	1503364	TRUE	FALSE	FALSE	digestive_system	stomach	STAD	MSS/MSI-L	R
SK-GT-4	1503365	TRUE	FALSE	FALSE	aero_dig_tract	oesophagus	ESCA	MSS/MSI-L	R
SK-HEP-1	909719	FALSE	TRUE	FALSE	digestive_system	liver	LIHC	MSS/MSI-L	D/F12
SK-LMS-1	909720	FALSE	TRUE	FALSE	soft_tissue	soft_tissue_other		MSS/MSI-L	D/F12
SK-LU-1	909721	FALSE	TRUE	FALSE	lung_NSCLC	lung_NSCLC_adenocarcinoma	LUAD	MSS/MSI-L	D/F12
SK-MEL-1	909723	FALSE	TRUE	TRUE	skin	melanoma	SKCM	MSS/MSI-L	D/F12
SK-MEL-2	905955	TRUE	FALSE	TRUE	skin	melanoma	SKCM	MSI-H	R
SK-MEL-24	909725	FALSE	TRUE	TRUE	skin	melanoma	SKCM	MSS/MSI-L	D/F12
SK-MEL-28	905954	FALSE	TRUE	TRUE	skin	melanoma	SKCM	MSS/MSI-L	D/F12
SK-MEL-3	909724	FALSE	TRUE	TRUE	skin	melanoma	SKCM	MSS/MSI-L	R
SK-MEL-30	909726	FALSE	TRUE	TRUE	skin	melanoma	SKCM	MSS/MSI-L	R
SK-MEL-31	909727	FALSE	TRUE	FALSE	skin	melanoma	SKCM	MSS/MSI-L	D/F12
SK-MEL-5	905956	FALSE	TRUE	TRUE	skin	melanoma	SKCM	MSS/MSI-L	D/F12
SK-MES-1	909728	FALSE	TRUE	TRUE	lung_NSCLC	lung_NSCLC_squamous_cell_carcinoma	LUSC	MSS/MSI-L	D/F12
SK-MG-1	909729	TRUE	FALSE	FALSE	nervous_system	glioma	GBM	MSS/MSI-L	R
SK-MM-2	753612	FALSE	TRUE	TRUE	myeloma	myeloma	MM	MSS/MSI-L	R
SK-N-AS	724828	FALSE	TRUE	TRUE	neuroblastoma	neuroblastoma	NB	MSS/MSI-L	D/F12
SK-N-DZ	688086	FALSE	TRUE	TRUE	neuroblastoma	neuroblastoma	NB	MSS/MSI-L	D/F12
SK-N-FI	688087	FALSE	TRUE	TRUE	neuroblastoma	neuroblastoma	NB	MSS/MSI-L	D/F12
SK-N-SH	717431	TRUE	FALSE	TRUE	neuroblastoma	neuroblastoma	NB	MSS/MSI-L	D/F12
SK-NEP-1	909730	TRUE	FALSE	FALSE	kidney	kidney
SK-OV-3	905959	FALSE	TRUE	TRUE	urogenital_system	ovary	OV	MSI-H	R
SK-PN-DW	909731	TRUE	FALSE	FALSE	bone	ewings_sarcoma		MSS/MSI-L	D/F12
SK-UT-1	909732	FALSE	TRUE	FALSE	soft_tissue	soft_tissue_other		MSI-H	D/F12
SKG-IIIa	930298	TRUE	FALSE	FALSE	urogenital_system	cervix	CESC	MSS/MSI-L	D/F12
SKM-1	909722	FALSE	TRUE	TRUE	leukemia	haematopoietic_neoplasm other		MSS/MSI-L	R
SKN	1240215	TRUE	FALSE	FALSE	urogenital_system	uterus		MSS/MSI-L	D/F12
SKN-3	1299059	TRUE	FALSE	FALSE	aero_dig_tract	head and neck	HNSC	MSS/MSI-L	R
SLVL	1331032	TRUE	FALSE	FALSE	lymphoma	B_cell_lymphoma	DLBC	MSS/MSI-L	R
SN12C	905979	TRUE	FALSE	FALSE	kidney	kidney	KIRC	MSS/MSI-L	D/F12
SNB75	905982	FALSE	TRUE	FALSE	nervous_system	glioma	GBM	MSS/MSI-L	R
SNG-M	909735	FALSE	TRUE	FALSE	urogenital_system	endometrium	UCEC	MSI-H	D/F12
SNU-1040	1659823	FALSE	TRUE	FALSE	large_intestine	large_intestine	COREAD	MSS/MSI-L	R
SNU-175	1659928	TRUE	TRUE	FALSE	large_intestine	large_intestine	COREAD	MSI-H	R
SNU-182	1240216	FALSE	TRUE	TRUE	digestive_system	liver	LIHC	MSS/MSI-L	R
SNU-283	1659929	TRUE	FALSE	FALSE	large_intestine	large_intestine	COREAD	MSS/MSI-L	R
SNU-387	909736	FALSE	TRUE	TRUE	digestive_system	liver	LIHC	MSS/MSI-L	R
SNU-398	1240217	FALSE	TRUE	TRUE	digestive_system	liver	LIHC	MSS/MSI-L	R
SNU-407	1660034	TRUE	TRUE	FALSE	large_intestine	large_intestine	COREAD	MSI-H	R
SNU-423	909737	FALSE	TRUE	TRUE	digestive_system	liver	LIHC	MSS/MSI-L	R
SNU-449	909738	FALSE	TRUE	TRUE	digestive_system	liver	LIHC	MSS/MSI-L	R
SNU-475	909739	FALSE	TRUE	TRUE	digestive_system	liver	LIHC	MSS/MSI-L	R
SNU-61	1660035	FALSE	TRUE	FALSE	large_intestine	large_intestine	COREAD	MSS/MSI-L	R
SNU-81	1660036	TRUE	TRUE	FALSE	large_intestine	large_intestine	COREAD	MSS/MSI-L	R
SNU-C1	910905	TRUE	TRUE	TRUE	large_intestine	large_intestine	COREAD	MSS/MSI-L	R
SNU-C2B	909740	TRUE	FALSE	FALSE	large_intestine	large_intestine	COREAD	MSI-H	R
SNU-C5	1674021	TRUE	TRUE	FALSE	large_intestine	large_intestine	COREAD	MSI-H	R
SR	905965	TRUE	FALSE	TRUE	lymphoma	lymphoid_neoplasm other		MSS/MSI-L	R
ST486	910906	TRUE	TRUE	FALSE	lymphoma	Burkitt_lymphoma		MSS/MSI-L	R
STS-0421	1299061	TRUE	FALSE	FALSE	soft_tissue	soft_tissue_other			R+10
SU-DHL-1	909742	FALSE	TRUE	TRUE	lymphoma	anaplastic_large_cell_lymphoma		MSS/MSI-L	R
SU-DHL-10	1331033	TRUE	TRUE	FALSE	lymphoma	B_cell_lymphoma	DLBC	MSS/MSI-L	R
SU-DHL-16	1331034	TRUE	FALSE	TRUE	lymphoma	B_cell_lymphoma	DLBC	MSS/MSI-L	R
SU-DHL-4	1331035	FALSE	TRUE	TRUE	lymphoma	B_cell_lymphoma	DLBC	MSS/MSI-L	R
SU-DHL-5	1331036	TRUE	TRUE	TRUE	lymphoma	B_cell_lymphoma	DLBC	MSS/MSI-L	R
SU-DHL-6	1331037	TRUE	TRUE	TRUE	lymphoma	B_cell_lymphoma	DLBC	MSS/MSI-L	R
SU-DHL-8	1331038	FALSE	TRUE	FALSE	lymphoma	B_cell_lymphoma	DLBC	MSS/MSI-L	R
SU8686	1240218	FALSE	TRUE	FALSE	pancreas	pancreas	PAAD	MSS/MSI-L	R
SUIT-2	1240219	TRUE	TRUE	TRUE	pancreas	pancreas	PAAD	MSS/MSI-L	R
SUP-B15	1247871	FALSE	TRUE	TRUE	leukemia	lymphoblastic_leukemia	ALL	MSS/MSI-L	D/F12
SUP-B8	910209	TRUE	FALSE	FALSE	leukemia	B_cell_leukemia		MSS/MSI-L	R
SUP-HD1	1331039	TRUE	FALSE	FALSE	lymphoma	Hodgkin_lymphoma		MSS/MSI-L	R
SUP-M2	1331040	FALSE	TRUE	FALSE	lymphoma	anaplastic_large_cell_lymphoma		MSS/MSI-L	R
SUP-T1	909743	FALSE	TRUE	FALSE	leukemia	lymphoblastic_T_cell_leukaemia	ALL	MSS/MSI-L	R
SW1088	909745	TRUE	TRUE	FALSE	nervous_system	glioma	GBM	MSS/MSI-L	D/F12
SW1116	909746	TRUE	TRUE	FALSE	large_intestine	large_intestine	COREAD	MSS/MSI-L	D/F12
SW1271	1299062	FALSE	TRUE	FALSE	lung_SCLC	lung_small_cell_carcinoma	SCLC	MSS/MSI-L	D/F12
SW13	909744	TRUE	FALSE	FALSE	kidney	adrenal_gland	ACC	MSS/MSI-L	D/F12
SW1417	909747	FALSE	TRUE	TRUE	large_intestine	large_intestine	COREAD	MSS/MSI-L	D/F12
SW1463	909748	TRUE	TRUE	TRUE	large_intestine	large_intestine	COREAD	MSS/MSI-L	D/F12
SW156	1240220	TRUE	FALSE	FALSE	kidney	kidney	KIRC	MSS/MSI-L	D/F12
SW1573	724878	TRUE	TRUE	TRUE	lung_NSCLC	lung_NSCLC_adenocarcinoma	LUAD	MSS/MSI-L	D/F12
SW1710	909749	TRUE	TRUE	FALSE	urogenital_system	Bladder	BLCA	MSS/MSI-L	D/F12
SW1783	909750	FALSE	TRUE	FALSE	nervous_system	glioma	LGG	MSS/MSI-L	D/F12
SW1990	910907	FALSE	TRUE	TRUE	pancreas	pancreas	PAAD	MSS/MSI-L	D/F12
SW403	910908	TRUE	FALSE	FALSE	large_intestine	large_intestine
SW48	909751	TRUE	TRUE	TRUE	large_intestine	large_intestine	COREAD	MSI-H	D/F12
SW620	905962	TRUE	TRUE	TRUE	large_intestine	large_intestine	COREAD	MSS/MSI-L	D/F12
SW626	909753	TRUE	FALSE	FALSE	urogenital_system	ovary	OV	MSS/MSI-L	D/F12
SW684	909754	TRUE	FALSE	FALSE	soft_tissue	fibrosarcoma		MSS/MSI-L	D/F12
SW756	724839	TRUE	FALSE	FALSE	urogenital_system	cervix	CESC	MSS/MSI-L	D/F12
SW780	687457	TRUE	TRUE	TRUE	urogenital_system	Bladder	BLCA	MSS/MSI-L	D/F12
SW837	909755	TRUE	TRUE	TRUE	large_intestine	large_intestine	COREAD	MSS/MSI-L	D/F12
SW872	909756	TRUE	FALSE	FALSE	soft_tissue	soft_tissue_other		MSS/MSI-L	D/F12
SW900	724879	FALSE	TRUE	TRUE	lung_NSCLC	lung_NSCLC_squamous_cell_carcinoma	LUSC	MSS/MSI-L	R
SW948	909757	TRUE	TRUE	TRUE	large_intestine	large_intestine	COREAD	MSS/MSI-L	D/F12
SW954	924247	TRUE	FALSE	FALSE	urogenital_system	urogenital_system_other		MSS/MSI-L	D/F12
SW962	909758	TRUE	FALSE	FALSE	urogenital_system	urogenital_system_other		MSS/MSI-L	D/F12
SW982	909759	TRUE	FALSE	TRUE	soft_tissue	soft_tissue_other		MSS/MSI-L	D/F12
T-24	724812	FALSE	TRUE	FALSE	urogenital_system	Bladder	BLCA	MSS/MSI-L	D/F12
T-T	1299064	FALSE	TRUE	FALSE	aero_dig_tract	oesophagus	ESCA	MSS/MSI-L	D/F12
T47D	905945	FALSE	TRUE	TRUE	breast	breast	BRCA	MSS/MSI-L	R
T84	909761	FALSE	TRUE	TRUE	large_intestine	large_intestine	COREAD	MSS/MSI-L	D/F12
T98G	687586	FALSE	TRUE	TRUE	nervous_system	glioma	GBM	MSS/MSI-L	D/F12
TALL-1	909762	FALSE	TRUE	FALSE	leukemia	lymphoblastic_T_cell_leukaemia	ALL	MSS/MSI-L	R
TASK1	1299067	TRUE	FALSE	FALSE	nervous_system	nervous_system_other
TC-71	1240221	FALSE	TRUE	TRUE	bone	ewings_sarcoma		MSS/MSI-L	D/F12
TC-YIK	946357	TRUE	FALSE	FALSE	urogenital_system	cervix		MSS/MSI-L	R
TCCSUP	687459	FALSE	TRUE	FALSE	urogenital_system	Bladder	BLCA	MSS/MSI-L	D/F12
TE-1	753621	FALSE	TRUE	FALSE	aero_dig_tract	oesophagus	ESCA	MSS/MSI-L	D/F12
TE-10	753622	TRUE	TRUE	FALSE	aero_dig_tract	oesophagus	ESCA	MSS/MSI-L	D/F12
TE-11	946354	FALSE	TRUE	FALSE	aero_dig_tract	oesophagus	ESCA	MSS/MSI-L	D/F12
TE-12	946356	TRUE	FALSE	FALSE	aero_dig_tract	oesophagus	ESCA	MSS/MSI-L	D/F12
TE-15	753614	FALSE	TRUE	FALSE	aero_dig_tract	oesophagus	ESCA	MSS/MSI-L	D/F12
TE-4	1503371	FALSE	TRUE	FALSE	aero_dig_tract	oesophagus	ESCA	MSS/MSI-L	R
TE-441-T	924248	TRUE	TRUE	FALSE	soft_tissue	rhabdomyosarcoma		MSS/MSI-L	D/F12
TE-5	735784	FALSE	TRUE	FALSE	aero_dig_tract	oesophagus	ESCA	MSS/MSI-L	D/F12
TE-6	946355	TRUE	TRUE	FALSE	aero_dig_tract	oesophagus	ESCA	MSS/MSI-L	D/F12
TE-8	753623	TRUE	TRUE	FALSE	aero_dig_tract	oesophagus	ESCA	MSS/MSI-L	D/F12
TE-9	946353	FALSE	TRUE	FALSE	aero_dig_tract	oesophagus	ESCA	MSS/MSI-L	D/F12
TF-1	1331044	FALSE	TRUE	FALSE	leukemia	acute_myeloid_leukaemia	LAML
TGBC11TKB	909770	TRUE	TRUE	FALSE	digestive_system	stomach	STAD	MSI-H	D/F12
TGBC1TKB	909769	TRUE	FALSE	FALSE	digestive_system	biliary_tract		MSS/MSI-L	D/F12
TGBC24TKB	910695	TRUE	FALSE	FALSE	digestive_system	biliary_tract		MSS/MSI-L	D/F12
TGW	910780	TRUE	FALSE	FALSE	neuroblastoma	neuroblastoma	NB	MSS/MSI-L	D/F12
THP-1	909771	FALSE	TRUE	TRUE	leukemia	acute_myeloid_leukaemia	LAML	MSS/MSI-L	R
TK	1331045	TRUE	FALSE	TRUE	lymphoma	B_cell_lymphoma	DLBC	MSS/MSI-L	R
TK10	905980	TRUE	FALSE	TRUE	kidney	kidney	KIRC	MSS/MSI-L	R
TMK-1	1299069	TRUE	FALSE	FALSE	digestive_system	stomach	STAD		R
Toledo	1331046	FALSE	TRUE	TRUE	lymphoma	B_cell_lymphoma	DLBC
TOV-112D	1299070	FALSE	TRUE	TRUE	urogenital_system	ovary	OV	MSS/MSI-L	D/F12
TOV-21G	1240222	FALSE	TRUE	FALSE	urogenital_system	ovary	OV	MSI-H	D/F12
TT	930299	FALSE	TRUE	FALSE	thyroid	thyroid	THCA	MSS/MSI-L	D/F12
TT2609-C02	1240223	TRUE	TRUE	FALSE	thyroid	thyroid	THCA	MSS/MSI-L	R
TUR	909773	TRUE	FALSE	FALSE	lymphoma	B_cell_lymphoma	DLBC	MSI-H	R
TYK-nu	909774	FALSE	TRUE	TRUE	urogenital_system	ovary	UNABLE TO CLASSIFY	MSS/MSI-L	D/F12
U-118-MG	687588	FALSE	TRUE	FALSE	nervous_system	glioma	GBM	MSS/MSI-L	D/F12
U-2-OS	909776	FALSE	TRUE	FALSE	bone	osteosarcoma		MSS/MSI-L	R
U-266	753615	TRUE	TRUE	FALSE	myeloma	myeloma	MM	MSS/MSI-L	R
U-698-M	909777	TRUE	FALSE	FALSE	leukemia	B_cell_leukemia		MSS/MSI-L	R
U-87-MG	687590	FALSE	TRUE	FALSE	nervous_system	glioma	GBM	MSS/MSI-L	D/F12
U-CH2	1503373	TRUE	FALSE	FALSE	bone	bone_other		MSS/MSI-L	D/F12
U031	905981	TRUE	TRUE	FALSE	kidney	kidney	KIRC	MSS/MSI-L	R
U251	905983	TRUE	TRUE	FALSE	nervous_system	glioma	GBM	MSS/MSI-L	D/F12
UACC-257	905977	FALSE	TRUE	TRUE	skin	melanoma	SKCM	MSS/MSI-L	R
UACC-62	905976	FALSE	TRUE	FALSE	skin	melanoma	SKCM	MSS/MSI-L	D/F12
UACC-812	910910	TRUE	TRUE	TRUE	breast	breast	BRCA	MSS/MSI-L	D/F12
UACC-893	909778	FALSE	TRUE	TRUE	breast	breast	BRCA	MSS/MSI-L	D/F12
UDSCC2	1299073	TRUE	FALSE	FALSE	aero_dig_tract	head and neck
UM-UC-3	724838	FALSE	TRUE	TRUE	urogenital_system	Bladder	BLCA	MSS/MSI-L	D/F12
UMC-11	909779	TRUE	FALSE	TRUE	lung_NSCLC	lung_NSCLC_carcinoid		MSS/MSI-L	D/F12
UWB1.289	1480374	TRUE	FALSE	FALSE	urogenital_system	ovary	OV	MSS/MSI-L	D/F12
VA-ES-BJ	688121	TRUE	FALSE	FALSE	soft_tissue	soft_tissue_other		MSS/MSI-L	D/F12
VAL	1331048	TRUE	FALSE	FALSE	lymphoma	B_cell_lymphoma	DLBC	MSS/MSI-L	R
VCaP	1299075	FALSE	TRUE	FALSE	urogenital_system	prostate	PRAD	MSS/MSI-L	D/F12
VM-CUB-1	909780	TRUE	TRUE	FALSE	urogenital_system	Bladder	BLCA	MSS/MSI-L	D/F12
VMRC-LCD	713869	TRUE	FALSE	TRUE	lung_NSCLC	lung_NSCLC_adenocarcinoma	LUAD		D/F12
VMRC-MELG	930301	TRUE	FALSE	FALSE	skin	melanoma	SKCM	MSS/MSI-L	D/F12
VMRC-RCW	1240224	FALSE	TRUE	FALSE	kidney	kidney	KIRC	MSS/MSI-L	R
VMRC-RCZ	909781	TRUE	TRUE	FALSE	kidney	kidney	KIRC	MSS/MSI-L	D/F12
WIL2-NS	1331049	TRUE	FALSE	FALSE	lymphoma	lymphoid_neoplasm other		MSS/MSI-L	R
WM-115	909784	FALSE	TRUE	TRUE	skin	melanoma	SKCM	MSS/MSI-L	D/F12
WM1552C	1299078	TRUE	FALSE	FALSE	skin	melanoma	SKCM	MSS/MSI-L	R
WM278	1240226	TRUE	FALSE	FALSE	skin	melanoma	SKCM	MSS/MSI-L	R
WM35	1299080	TRUE	FALSE	FALSE	skin	melanoma	SKCM	MSS/MSI-L	R
WM793B	1299081	TRUE	FALSE	FALSE	skin	melanoma	SKCM	MSS/MSI-L	R
WSU-DLCL2	1331050	TRUE	TRUE	TRUE	lymphoma	B_cell_lymphoma	DLBC	MSS/MSI-L	R
WSU-NHL	909785	TRUE	FALSE	FALSE	lymphoma	lymphoid_neoplasm other		MSI-H	R
YAPC	909904	TRUE	TRUE	TRUE	pancreas	pancreas	PAAD	MSS/MSI-L	R
YH-13	909905	TRUE	TRUE	FALSE	nervous_system	glioma	GBM	MSS/MSI-L	D/F12
YKG-1	687592	FALSE	TRUE	FALSE	nervous_system	glioma	GBM	MSS/MSI-L	D/F12
YMB-1-E	1303911	FALSE	FALSE	TRUE	breast	breast	BRCA	MSS/MSI-L	R
YT	946358	TRUE	FALSE	FALSE	lymphoma	lymphoid_neoplasm other	ALL	MSS/MSI-L	D/F12
ZR-75-30	909907	TRUE	TRUE	TRUE	breast	breast	BRCA	MSS/MSI-L	R

## Sheet: table 1B
Table S1B. TCGA samples
full_brc_id	TCGA.Study.Abbreviation	disease_status	sample_brc_id	AGE	GENDER
TCGA-G9-A9S0-01A-11R-A41O-07	PRAD	tumor	TCGA-G9-A9S0-01	53	MALE
TCGA-E1-5318-01A-01R-1470-07	LGG	tumor	TCGA-E1-5318-01	42	FEMALE
TCGA-25-1625-01A-01R-1566-13	OV	tumor	TCGA-25-1625-01	66	FEMALE
TCGA-A2-A0T1-01A-21R-A084-07	BRCA	tumor	TCGA-A2-A0T1-01	55	FEMALE
TCGA-ER-A19N-06A-11R-A18S-07	SKCM	tumor	TCGA-ER-A19N-06	47	MALE
TCGA-44-4112-01A-01R-A278-07	LUAD	tumor	TCGA-44-4112-01	60	FEMALE
TCGA-A7-A3J0-01A-11R-A213-07	BRCA	tumor	TCGA-A7-A3J0-01	62	FEMALE
TCGA-85-8350-01A-11R-2296-07	LUSC	tumor	TCGA-85-8350-01	61	MALE
TCGA-FE-A236-01A-11R-A16R-07	THCA	tumor	TCGA-FE-A236-01	33	MALE
TCGA-XK-AAIW-01A-11R-A41O-07	PRAD	tumor	TCGA-XK-AAIW-01	78	MALE
TCGA-AO-A126-01A-11R-A10J-07	BRCA	tumor	TCGA-AO-A126-01	39	FEMALE
TCGA-DI-A1BY-01A-21R-A137-07	UCEC	tumor	TCGA-DI-A1BY-01	63	FEMALE
TCGA-FS-A1ZW-06A-12R-A18T-07	SKCM	tumor	TCGA-FS-A1ZW-06	65	MALE
TCGA-77-6844-01A-11R-1949-07	LUSC	tumor	TCGA-77-6844-01	74	MALE
TCGA-FS-A1ZD-06A-11R-A18T-07	SKCM	tumor	TCGA-FS-A1ZD-06	63	MALE
TCGA-5P-A9JW-01A-11R-A42S-07	KIRP	tumor	TCGA-5P-A9JW-01	64	MALE
TCGA-95-8494-01A-11R-2326-07	LUAD	tumor	TCGA-95-8494-01	67	MALE
TCGA-CV-A6JM-01A-11R-A31N-07	HNSC	tumor	TCGA-CV-A6JM-01	85	MALE
TCGA-C5-A3HE-01A-21R-A22U-07	CESC	tumor	TCGA-C5-A3HE-01	44	FEMALE
TCGA-DM-A28G-01A-11R-A16W-07	COREAD	tumor	TCGA-DM-A28G-01	75	MALE
TCGA-OR-A5J2-01A-11R-A29S-07	ACC	tumor	TCGA-OR-A5J2-01	44	FEMALE
TCGA-J4-A67M-01A-11R-A30B-07	PRAD	tumor	TCGA-J4-A67M-01	55	MALE
TCGA-J8-A3YF-01A-12R-A23N-07	THCA	tumor	TCGA-J8-A3YF-01	83	MALE
TCGA-E2-A14X-01A-11R-A115-07	BRCA	tumor	TCGA-E2-A14X-01	55	FEMALE
TCGA-B0-5121-01A-02R-1420-07	KIRC	tumor	TCGA-B0-5121-01	56	MALE
TCGA-35-5375-01A-01R-1628-07	LUAD	tumor	TCGA-35-5375-01	61	MALE
TCGA-61-2113-01A-01R-1568-13	OV	tumor	TCGA-61-2113-01	53	FEMALE
TCGA-06-0174-01A-01R-1849-01	GBM	tumor	TCGA-06-0174-01	54	MALE
TCGA-A7-A13G-01A-11R-A13Q-07	BRCA	tumor	TCGA-A7-A13G-01	79	FEMALE
TCGA-CF-A47X-01A-31R-A23W-07	BLCA	tumor	TCGA-CF-A47X-01	60	MALE
TCGA-R8-A6YH-01A-21R-A32Q-07	LGG	tumor	TCGA-R8-A6YH-01	1	2
TCGA-J4-A67Q-01A-21R-A30B-07	PRAD	tumor	TCGA-J4-A67Q-01	77	MALE
TCGA-AB-2990-03B-01T-0748-13	LAML	tumor	TCGA-AB-2990-03	51	MALE
TCGA-CV-A6JT-01A-11R-A31N-07	HNSC	tumor	TCGA-CV-A6JT-01	65	MALE
TCGA-CJ-4637-01A-02R-1325-07	KIRC	tumor	TCGA-CJ-4637-01	52	FEMALE
TCGA-FG-5963-01A-11R-1708-07	LGG	tumor	TCGA-FG-5963-01	23	MALE
TCGA-EB-A97M-01A-11R-A38C-07	SKCM	tumor	TCGA-EB-A97M-01	66	MALE
TCGA-27-1830-01A-01R-1850-01	GBM	tumor	TCGA-27-1830-01	57	MALE
TCGA-98-7454-01A-11R-2045-07	LUSC	tumor	TCGA-98-7454-01	73	MALE
TCGA-24-0968-01A-01R-1569-13	OV	tumor	TCGA-24-0968-01	59	FEMALE
TCGA-AR-A0TP-01A-11R-A084-07	BRCA	tumor	TCGA-AR-A0TP-01	43	FEMALE
TCGA-AA-A004-01A-01R-A00A-07	COREAD	tumor	TCGA-AA-A004-01	76	MALE
TCGA-22-4594-01A-01R-1201-07	LUSC	tumor	TCGA-22-4594-01	60	FEMALE
TCGA-N6-A4VF-01A-31R-A28V-07	UCS	tumor	TCGA-N6-A4VF-01	51	FEMALE
TCGA-IN-7808-01A-11R-2203-13	STAD	tumor	TCGA-IN-7808-01	59.05	MALE
TCGA-23-1032-01A-02R-1564-13	OV	tumor	TCGA-23-1032-01	73	FEMALE
TCGA-55-7903-01A-11R-2170-07	LUAD	tumor	TCGA-55-7903-01	64	MALE
TCGA-EA-A3HT-01A-61R-A21T-07	CESC	tumor	TCGA-EA-A3HT-01	68	FEMALE
TCGA-XJ-A83G-01A-11R-A352-07	PRAD	tumor	TCGA-XJ-A83G-01	51	MALE
TCGA-E2-A15S-01A-11R-A115-07	BRCA	tumor	TCGA-E2-A15S-01	34	FEMALE
TCGA-DD-A113-01A-11R-A131-07	LIHC	tumor	TCGA-DD-A113-01	55	FEMALE
TCGA-09-2051-01A-01R-1568-13	OV	tumor	TCGA-09-2051-01	42	FEMALE
TCGA-IA-A83V-01A-11R-A355-07	KIRP	tumor	TCGA-IA-A83V-01	63	MALE
TCGA-CV-7424-01A-11R-2081-07	HNSC	tumor	TCGA-CV-7424-01	67	MALE
TCGA-C5-A1M5-01A-11R-A13Y-07	CESC	tumor	TCGA-C5-A1M5-01	53	FEMALE
TCGA-ZP-A9CZ-01A-11R-A38B-07	LIHC	tumor	TCGA-ZP-A9CZ-01	72	MALE
TCGA-BR-7851-01A-11R-2203-13	STAD	tumor	TCGA-BR-7851-01	74.17	MALE
TCGA-EO-A22T-01A-21R-A18M-07	UCEC	tumor	TCGA-EO-A22T-01	56	FEMALE
TCGA-AX-A2HC-01A-11R-A17B-07	UCEC	tumor	TCGA-AX-A2HC-01	53	FEMALE
TCGA-TQ-A7RF-01A-11R-A33Z-07	LGG	tumor	TCGA-TQ-A7RF-01	27	FEMALE
TCGA-06-0190-01A-01R-1849-01	GBM	tumor	TCGA-06-0190-01	62	MALE
TCGA-AX-A060-01A-11R-A00V-07	UCEC	tumor	TCGA-AX-A060-01	77	FEMALE
TCGA-BD-A2L6-01A-11R-A213-07	LIHC	tumor	TCGA-BD-A2L6-01	69	MALE
TCGA-CK-4950-01A-01R-1723-07	COREAD	tumor	TCGA-CK-4950-01	68	FEMALE
TCGA-FF-8047-01A-11R-2213-07	DLBC	tumor	TCGA-FF-8047-01	38	FEMALE
TCGA-A2-A1FW-01A-11R-A13Q-07	BRCA	tumor	TCGA-A2-A1FW-01	62	FEMALE
TCGA-B0-4712-01A-01R-1503-07	KIRC	tumor	TCGA-B0-4712-01	76	MALE
TCGA-CS-5394-01A-01R-1470-07	LGG	tumor	TCGA-CS-5394-01	40	MALE
TCGA-14-0736-02A-01R-2005-01	GBM	tumor	TCGA-14-0736-02	49	MALE
TCGA-H9-A6BY-01A-11R-A30B-07	PRAD	tumor	TCGA-H9-A6BY-01	63	MALE
TCGA-GV-A3QI-01A-11R-A220-07	BLCA	tumor	TCGA-GV-A3QI-01	48	MALE
TCGA-HN-A2OB-01A-21R-A27Q-07	BRCA	tumor	TCGA-HN-A2OB-01	45	FEMALE
TCGA-D5-5539-01A-01R-1653-07	COREAD	tumor	TCGA-D5-5539-01	60	MALE
TCGA-KK-A59Z-01A-12R-A26U-07	PRAD	tumor	TCGA-KK-A59Z-01	66	MALE
TCGA-IN-AB1X-01A-11R-A39E-31	STAD	tumor	TCGA-IN-AB1X-01	78	FEMALE
TCGA-EJ-A65M-01A-11R-A29R-07	PRAD	tumor	TCGA-EJ-A65M-01	65	MALE
TCGA-PG-A7D5-01A-11R-A34R-07	UCEC	tumor	TCGA-PG-A7D5-01	62	FEMALE
TCGA-NG-A4VW-01A-11R-A28V-07	UCS	tumor	TCGA-NG-A4VW-01	74	FEMALE
TCGA-CH-5748-01A-11R-1580-07	PRAD	tumor	TCGA-CH-5748-01	64	MALE
TCGA-E1-A7YN-01A-11R-A34F-07	LGG	tumor	TCGA-E1-A7YN-01	63	FEMALE
TCGA-FP-8631-01A-11R-2402-13	STAD	tumor	TCGA-FP-8631-01	68.17	MALE
TCGA-B8-4151-01A-01R-1188-07	KIRC	tumor	TCGA-B8-4151-01	51	FEMALE
TCGA-ET-A3DQ-01A-11R-A19O-07	THCA	tumor	TCGA-ET-A3DQ-01	43	FEMALE
TCGA-IQ-7630-01A-11R-2081-07	HNSC	tumor	TCGA-IQ-7630-01	49	MALE
TCGA-D3-A8GB-06A-11R-A37K-07	SKCM	tumor	TCGA-D3-A8GB-06	48	MALE
TCGA-AY-6196-01A-11R-1723-07	COREAD	tumor	TCGA-AY-6196-01	47	MALE
TCGA-D1-A0ZS-01A-11R-A118-07	UCEC	tumor	TCGA-D1-A0ZS-01	54	FEMALE
TCGA-56-5898-01A-11R-1635-07	LUSC	tumor	TCGA-56-5898-01	69	MALE
TCGA-FF-A7CR-01A-11R-A38C-07	DLBC	tumor	TCGA-FF-A7CR-01	61	MALE
TCGA-AH-6547-01A-11R-1830-07	COREAD	tumor	TCGA-AH-6547-01	79	FEMALE
TCGA-AX-A2H5-01A-11R-A17B-07	UCEC	tumor	TCGA-AX-A2H5-01	67	FEMALE
TCGA-B0-4819-01A-01R-1277-07	KIRC	tumor	TCGA-B0-4819-01	60	FEMALE
TCGA-63-A5MJ-01A-11R-A27Q-07	LUSC	tumor	TCGA-63-A5MJ-01	54	MALE
TCGA-44-6776-01A-11R-1858-07	LUAD	tumor	TCGA-44-6776-01	60	FEMALE
TCGA-A6-6650-01B-02R-A277-07	COREAD	tumor	TCGA-A6-6650-01	69	FEMALE
TCGA-79-5596-01A-31R-1949-07	LUSC	tumor	TCGA-79-5596-01	1	MALE
TCGA-AA-3818-01A-01R-0905-07	COREAD	tumor	TCGA-AA-3818-01	78	FEMALE
TCGA-EL-A4KG-01A-11R-A250-07	THCA	tumor	TCGA-EL-A4KG-01	35	FEMALE
TCGA-P5-A5F4-01A-11R-A28M-07	LGG	tumor	TCGA-P5-A5F4-01	35	FEMALE
TCGA-HC-A9TE-01A-11R-A41O-07	PRAD	tumor	TCGA-HC-A9TE-01	64	MALE
TCGA-BP-4160-01A-02R-1289-07	KIRC	tumor	TCGA-BP-4160-01	67	MALE
TCGA-UZ-A9PN-01A-11R-A38C-07	KIRP	tumor	TCGA-UZ-A9PN-01	54	MALE
TCGA-2Z-A9JI-01A-11R-A42S-07	KIRP	tumor	TCGA-2Z-A9JI-01	38	MALE
TCGA-E1-A7YI-01A-11R-A34F-07	LGG	tumor	TCGA-E1-A7YI-01	33	FEMALE
TCGA-B6-A0I1-01A-11R-A21T-07	BRCA	tumor	TCGA-B6-A0I1-01	73	FEMALE
TCGA-CN-6989-01A-11R-1915-07	HNSC	tumor	TCGA-CN-6989-01	64	MALE
TCGA-FD-A3SL-01A-21R-A22U-07	BLCA	tumor	TCGA-FD-A3SL-01	60	MALE
TCGA-DJ-A2PV-01A-11R-A19O-07	THCA	tumor	TCGA-DJ-A2PV-01	53	FEMALE
TCGA-J9-A52C-01A-11R-A26U-07	PRAD	tumor	TCGA-J9-A52C-01	57	MALE
TCGA-AG-3608-01A-01R-0826-07	COREAD	tumor	TCGA-AG-3608-01	79	FEMALE
TCGA-CN-A49A-01A-11R-A24H-07	HNSC	tumor	TCGA-CN-A49A-01	60	MALE
TCGA-LL-A440-01A-11R-A24H-07	BRCA	tumor	TCGA-LL-A440-01	61	FEMALE
TCGA-DJ-A13L-01A-11R-A220-07	THCA	tumor	TCGA-DJ-A13L-01	85	MALE
TCGA-HT-8105-01A-11R-2404-07	LGG	tumor	TCGA-HT-8105-01	54	MALE
TCGA-OR-A5JI-01A-11R-A29S-07	ACC	tumor	TCGA-OR-A5JI-01	22	MALE
TCGA-EP-A2KA-01A-11R-A180-07	LIHC	tumor	TCGA-EP-A2KA-01	52	FEMALE
TCGA-E2-A14T-01A-11R-A115-07	BRCA	tumor	TCGA-E2-A14T-01	52	FEMALE
TCGA-G9-6371-01A-11R-1789-07	PRAD	tumor	TCGA-G9-6371-01	58	MALE
TCGA-DB-A64P-01A-11R-A29R-07	LGG	tumor	TCGA-DB-A64P-01	40	MALE
TCGA-MP-A4T7-01A-11R-A24X-07	LUAD	tumor	TCGA-MP-A4T7-01	75	FEMALE
TCGA-F7-A50J-01A-21R-A28V-07	HNSC	tumor	TCGA-F7-A50J-01	67	FEMALE
TCGA-LL-A740-01A-21R-A32P-07	BRCA	tumor	TCGA-LL-A740-01	61	FEMALE
TCGA-G3-A7M8-01A-11R-A33R-07	LIHC	tumor	TCGA-G3-A7M8-01	31	MALE
TCGA-XF-AAME-01A-12R-A42T-07	BLCA	tumor	TCGA-XF-AAME-01	64	FEMALE
TCGA-BH-A5IZ-01A-11R-A27Q-07	BRCA	tumor	TCGA-BH-A5IZ-01	51	FEMALE
TCGA-IN-8663-01A-11R-2402-13	STAD	tumor	TCGA-IN-8663-01	68.92	MALE
TCGA-E9-A1N5-01A-11R-A14D-07	BRCA	tumor	TCGA-E9-A1N5-01	45	FEMALE
TCGA-DB-A64O-01A-11R-A29R-07	LGG	tumor	TCGA-DB-A64O-01	59	MALE
TCGA-HT-7902-01A-12R-2403-07	LGG	tumor	TCGA-HT-7902-01	30	FEMALE
TCGA-DA-A1I0-06A-11R-A20F-07	SKCM	tumor	TCGA-DA-A1I0-06	63	MALE
TCGA-24-2026-01A-01R-1567-13	OV	tumor	TCGA-24-2026-01	79	FEMALE
TCGA-BF-AAP2-01A-11R-A40A-07	SKCM	tumor	TCGA-BF-AAP2-01	62	MALE
TCGA-BD-A3EP-01A-11R-A22L-07	LIHC	tumor	TCGA-BD-A3EP-01	75	FEMALE
TCGA-ER-A19W-06A-41R-A239-07	SKCM	tumor	TCGA-ER-A19W-06	48	FEMALE
TCGA-BQ-5886-01A-11R-1592-07	KIRP	tumor	TCGA-BQ-5886-01	75	MALE
TCGA-AJ-A3OL-01A-11R-A22K-07	UCEC	tumor	TCGA-AJ-A3OL-01	55	FEMALE
TCGA-C5-A1M7-01A-11R-A13Y-07	CESC	tumor	TCGA-C5-A1M7-01	37	FEMALE
TCGA-D1-A176-01A-11R-A12I-07	UCEC	tumor	TCGA-D1-A176-01	67	FEMALE
TCGA-XF-A8HF-01A-11R-A36F-07	BLCA	tumor	TCGA-XF-A8HF-01	80	MALE
TCGA-BG-A0RY-01A-11R-A104-07	UCEC	tumor	TCGA-BG-A0RY-01	68	FEMALE
TCGA-KN-8419-01A-11R-2315-07	KICH	tumor	TCGA-KN-8419-01	43	MALE
TCGA-3Z-A93Z-01A-11R-A37O-07	KIRC	tumor	TCGA-3Z-A93Z-01	1	1
TCGA-DH-A66D-01A-11R-A31N-07	LGG	tumor	TCGA-DH-A66D-01	43	FEMALE
TCGA-32-5222-01A-01R-1850-01	GBM	tumor	TCGA-32-5222-01	66	MALE
TCGA-BH-A18L-01A-32R-A12D-07	BRCA	tumor	TCGA-BH-A18L-01	50	FEMALE
TCGA-AB-2952-03B-01T-0760-13	LAML	tumor	TCGA-AB-2952-03	60	FEMALE
TCGA-2F-A9KR-01A-11R-A38B-07	BLCA	tumor	TCGA-2F-A9KR-01	59	FEMALE
TCGA-GM-A2DC-01A-11R-A18M-07	BRCA	tumor	TCGA-GM-A2DC-01	57	FEMALE
TCGA-OR-A5JL-01A-11R-A29S-07	ACC	tumor	TCGA-OR-A5JL-01	36	FEMALE
TCGA-EJ-A46E-01A-31R-A250-07	PRAD	tumor	TCGA-EJ-A46E-01	57	MALE
TCGA-KN-8434-01A-11R-2315-07	KICH	tumor	TCGA-KN-8434-01	65	FEMALE
TCGA-D1-A3DH-01A-11R-A19W-07	UCEC	tumor	TCGA-D1-A3DH-01	71	FEMALE
TCGA-VQ-A91E-01A-31R-A414-31	STAD	tumor	TCGA-VQ-A91E-01	67	FEMALE
TCGA-AA-A024-01A-02R-A00A-07	COREAD	tumor	TCGA-AA-A024-01	81	MALE
TCGA-E9-A1NC-01A-21R-A26B-07	BRCA	tumor	TCGA-E9-A1NC-01	61	FEMALE
TCGA-60-2722-01A-01R-0851-07	LUSC	tumor	TCGA-60-2722-01	66	MALE
TCGA-R8-A6ML-01A-11R-A32Q-07	LGG	tumor	TCGA-R8-A6ML-01	52	MALE
TCGA-BH-A0C0-01A-21R-A056-07	BRCA	tumor	TCGA-BH-A0C0-01	62	FEMALE
TCGA-DE-A4MA-01A-11R-A250-07	THCA	tumor	TCGA-DE-A4MA-01	52	FEMALE
TCGA-AB-2917-03A-01T-0734-13	LAML	tumor	TCGA-AB-2917-03	41	FEMALE
TCGA-DD-AADD-01A-11R-A41C-07	LIHC	tumor	TCGA-DD-AADD-01	51	MALE
TCGA-W3-A825-06A-11R-A352-07	SKCM	tumor	TCGA-W3-A825-06	60	FEMALE
TCGA-XF-A9T8-01A-11R-A39I-07	BLCA	tumor	TCGA-XF-A9T8-01	64	MALE
TCGA-QA-A7B7-01A-11R-A32O-07	LIHC	tumor	TCGA-QA-A7B7-01	48	MALE
TCGA-AG-3885-01A-01R-0905-07	COREAD	tumor	TCGA-AG-3885-01	71	FEMALE
TCGA-S9-A6WI-01A-21R-A33Z-07	LGG	tumor	TCGA-S9-A6WI-01	56	FEMALE
TCGA-BC-A10S-01A-22R-A131-07	LIHC	tumor	TCGA-BC-A10S-01	81	MALE
TCGA-N8-A4PO-01A-11R-A28V-07	UCS	tumor	TCGA-N8-A4PO-01	66	FEMALE
TCGA-ER-A19J-06A-11R-A18S-07	SKCM	tumor	TCGA-ER-A19J-06	54	MALE
TCGA-44-5645-01A-01R-A278-07	LUAD	tumor	TCGA-44-5645-01	61	FEMALE
TCGA-B0-4697-01A-01R-1277-07	KIRC	tumor	TCGA-B0-4697-01	46	FEMALE
TCGA-CV-5966-01A-11R-1686-07	HNSC	tumor	TCGA-CV-5966-01	63	FEMALE
TCGA-CH-5764-01A-21R-1580-07	PRAD	tumor	TCGA-CH-5764-01	66	MALE
TCGA-A2-A0EU-01A-22R-A056-07	BRCA	tumor	TCGA-A2-A0EU-01	79	FEMALE
TCGA-M7-A721-01A-12R-A32O-07	PRAD	tumor	TCGA-M7-A721-01	70	MALE
TCGA-BG-A0MS-01A-11R-A104-07	UCEC	tumor	TCGA-BG-A0MS-01	53	FEMALE
TCGA-CD-8536-01A-11R-2343-13	STAD	tumor	TCGA-CD-8536-01	74.82	MALE
TCGA-AR-A24U-01A-11R-A169-07	BRCA	tumor	TCGA-AR-A24U-01	47	FEMALE
TCGA-E5-A4U1-01A-11R-A31N-07	BLCA	tumor	TCGA-E5-A4U1-01	72	MALE
TCGA-24-2281-01A-01R-1568-13	OV	tumor	TCGA-24-2281-01	68	FEMALE
TCGA-HT-7694-01A-11R-2256-07	LGG	tumor	TCGA-HT-7694-01	60	MALE
TCGA-CV-6936-01A-11R-1915-07	HNSC	tumor	TCGA-CV-6936-01	68	MALE
TCGA-C5-A1BN-01B-11R-A14Y-07	CESC	tumor	TCGA-C5-A1BN-01	26	FEMALE
TCGA-A8-A096-01A-11R-A00Z-07	BRCA	tumor	TCGA-A8-A096-01	73	FEMALE
TCGA-EM-A4FK-01A-11R-A250-07	THCA	tumor	TCGA-EM-A4FK-01	33	FEMALE
TCGA-60-2711-01A-01R-0851-07	LUSC	tumor	TCGA-60-2711-01	64	FEMALE
TCGA-KK-A6DY-01A-12R-A311-07	PRAD	tumor	TCGA-KK-A6DY-01	50	MALE
TCGA-ZG-A9LU-01A-11R-A41O-07	PRAD	tumor	TCGA-ZG-A9LU-01	67	MALE
TCGA-EW-A1PG-01A-11R-A144-07	BRCA	tumor	TCGA-EW-A1PG-01	53	FEMALE
TCGA-34-5927-01A-11R-1820-07	LUSC	tumor	TCGA-34-5927-01	70	FEMALE
TCGA-VQ-A8PM-01A-21R-A414-31	STAD	tumor	TCGA-VQ-A8PM-01	56	MALE
TCGA-29-1688-01A-01R-1566-13	OV	tumor	TCGA-29-1688-01	39	FEMALE
TCGA-FC-7961-01A-11R-A29R-07	PRAD	tumor	TCGA-FC-7961-01	62	MALE
TCGA-IA-A40Y-01A-11R-A24Z-07	KIRP	tumor	TCGA-IA-A40Y-01	60	FEMALE
TCGA-CN-5365-01A-01R-1436-07	HNSC	tumor	TCGA-CN-5365-01	38	MALE
TCGA-D7-8574-01A-13R-2343-13	STAD	tumor	TCGA-D7-8574-01	72.79	MALE
TCGA-BC-A69H-01A-11R-A311-07	LIHC	tumor	TCGA-BC-A69H-01	64	MALE
TCGA-D8-A1XJ-01A-11R-A14M-07	BRCA	tumor	TCGA-D8-A1XJ-01	76	FEMALE
TCGA-A8-A082-01A-11R-A00Z-07	BRCA	tumor	TCGA-A8-A082-01	58	FEMALE
TCGA-2Y-A9GZ-01A-11R-A39D-07	LIHC	tumor	TCGA-2Y-A9GZ-01	82	FEMALE
TCGA-VQ-AA6I-01A-11R-A414-31	STAD	tumor	TCGA-VQ-AA6I-01	68	MALE
TCGA-XJ-A9DK-01A-11R-A37L-07	PRAD	tumor	TCGA-XJ-A9DK-01	63	MALE
TCGA-CN-4735-01A-01R-1436-07	HNSC	tumor	TCGA-CN-4735-01	52	MALE
TCGA-55-7913-01B-11R-2241-07	LUAD	tumor	TCGA-55-7913-01	61	FEMALE
TCGA-86-8585-01A-11R-2403-07	LUAD	tumor	TCGA-86-8585-01	57	MALE
TCGA-A2-A3KD-01A-12R-A213-07	BRCA	tumor	TCGA-A2-A3KD-01	47	FEMALE
TCGA-DG-A2KM-01A-11R-A180-07	CESC	tumor	TCGA-DG-A2KM-01	46	FEMALE
TCGA-DA-A95Y-06A-11R-A37K-07	SKCM	tumor	TCGA-DA-A95Y-06	68	MALE
TCGA-A6-6650-01A-11R-1774-07	COREAD	tumor	TCGA-A6-6650-01	69	FEMALE
TCGA-GM-A2DK-01A-21R-A180-07	BRCA	tumor	TCGA-GM-A2DK-01	58	FEMALE
TCGA-B6-A0WY-01A-11R-A109-07	BRCA	tumor	TCGA-B6-A0WY-01	40	FEMALE
TCGA-KO-8410-01A-11R-2315-07	KICH	tumor	TCGA-KO-8410-01	74	FEMALE
TCGA-DV-5569-01A-01R-1541-07	KIRC	tumor	TCGA-DV-5569-01	29	FEMALE
TCGA-2Y-A9H1-01A-11R-A38B-07	LIHC	tumor	TCGA-2Y-A9H1-01	58	MALE
TCGA-DA-A95X-06A-11R-A37K-07	SKCM	tumor	TCGA-DA-A95X-06	62	MALE
TCGA-VN-A88Q-01A-11R-A352-07	PRAD	tumor	TCGA-VN-A88Q-01	60	MALE
TCGA-E2-A159-01A-11R-A115-07	BRCA	tumor	TCGA-E2-A159-01	50	FEMALE
TCGA-KK-A7AP-01A-12R-A33R-07	PRAD	tumor	TCGA-KK-A7AP-01	55	MALE
TCGA-FG-5962-01B-11R-1896-07	LGG	tumor	TCGA-FG-5962-01	54	MALE
TCGA-B0-4827-01A-02R-1420-07	KIRC	tumor	TCGA-B0-4827-01	77	FEMALE
TCGA-61-1919-01A-01R-1568-13	OV	tumor	TCGA-61-1919-01	58	FEMALE
TCGA-A8-A06P-01A-11R-A00Z-07	BRCA	tumor	TCGA-A8-A06P-01	63	FEMALE
TCGA-OR-A5JS-01A-11R-A29S-07	ACC	tumor	TCGA-OR-A5JS-01	65	FEMALE
TCGA-HC-A48F-01A-11R-A250-07	PRAD	tumor	TCGA-HC-A48F-01	47	MALE
TCGA-BP-4162-01A-02R-1325-07	KIRC	tumor	TCGA-BP-4162-01	65	FEMALE
TCGA-BH-A18R-01A-11R-A12D-07	BRCA	tumor	TCGA-BH-A18R-01	50	FEMALE
TCGA-D3-A2JA-06A-11R-A18T-07	SKCM	tumor	TCGA-D3-A2JA-06	68	MALE
TCGA-AR-A1AU-01A-11R-A12P-07	BRCA	tumor	TCGA-AR-A1AU-01	39	FEMALE
TCGA-DD-AAEB-01A-11R-A41C-07	LIHC	tumor	TCGA-DD-AAEB-01	60	MALE
TCGA-HT-8558-01A-21R-2404-07	LGG	tumor	TCGA-HT-8558-01	29	FEMALE
TCGA-HT-7857-01A-11R-2403-07	LGG	tumor	TCGA-HT-7857-01	24	FEMALE
TCGA-AA-3693-01A-01R-0905-07	COREAD	tumor	TCGA-AA-3693-01	77	FEMALE
TCGA-EK-A2PM-01A-11R-A18M-07	CESC	tumor	TCGA-EK-A2PM-01	81	FEMALE
TCGA-CR-7368-01A-11R-2132-07	HNSC	tumor	TCGA-CR-7368-01	54	MALE
TCGA-69-A59K-01A-11R-A262-07	LUAD	tumor	TCGA-69-A59K-01	60	FEMALE
TCGA-C8-A273-01A-11R-A16F-07	BRCA	tumor	TCGA-C8-A273-01	29	FEMALE
TCGA-D6-A6EK-01A-11R-A31N-07	HNSC	tumor	TCGA-D6-A6EK-01	67	MALE
TCGA-LL-A6FQ-01A-11R-A31O-07	BRCA	tumor	TCGA-LL-A6FQ-01	77	FEMALE
TCGA-E9-A295-01A-11R-A16F-07	BRCA	tumor	TCGA-E9-A295-01	71	FEMALE
TCGA-FF-A7CQ-01A-11R-A38C-07	DLBC	tumor	TCGA-FF-A7CQ-01	74	MALE
TCGA-DS-A1OB-01A-11R-A14Y-07	CESC	tumor	TCGA-DS-A1OB-01	45	FEMALE
TCGA-CV-7432-01A-11R-2132-07	HNSC	tumor	TCGA-CV-7432-01	79	MALE
TCGA-DD-AADM-01A-11R-A41C-07	LIHC	tumor	TCGA-DD-AADM-01	58	MALE
TCGA-CW-6087-01A-11R-1672-07	KIRC	tumor	TCGA-CW-6087-01	61	MALE
TCGA-BF-A3DN-01A-11R-A20F-07	SKCM	tumor	TCGA-BF-A3DN-01	81	FEMALE
TCGA-04-1651-01A-01R-1567-13	OV	tumor	TCGA-04-1651-01	53	FEMALE
TCGA-DK-AA75-01A-11R-A39I-07	BLCA	tumor	TCGA-DK-AA75-01	82	MALE
TCGA-HT-7875-01A-11R-2403-07	LGG	tumor	TCGA-HT-7875-01	56	MALE
TCGA-AB-2939-03A-01T-0740-13	LAML	tumor	TCGA-AB-2939-03	72	MALE
TCGA-BH-A1FJ-01A-11R-A13Q-07	BRCA	tumor	TCGA-BH-A1FJ-01	66	FEMALE
TCGA-50-5933-01A-11R-1755-07	LUAD	tumor	TCGA-50-5933-01	72	MALE
TCGA-2Y-A9GV-01A-11R-A38B-07	LIHC	tumor	TCGA-2Y-A9GV-01	54	FEMALE
TCGA-E2-A105-01A-11R-A10J-07	BRCA	tumor	TCGA-E2-A105-01	79	FEMALE
TCGA-61-1740-01A-01R-1567-13	OV	tumor	TCGA-61-1740-01	71	FEMALE
TCGA-EM-A2CL-01A-11R-A180-07	THCA	tumor	TCGA-EM-A2CL-01	31	MALE
TCGA-AB-2810-03A-01T-0736-13	LAML	tumor	TCGA-AB-2810-03	76	FEMALE
TCGA-B9-4116-01A-02R-1351-07	KIRP	tumor	TCGA-B9-4116-01	75	FEMALE
TCGA-HC-8265-01B-04R-2302-07	PRAD	tumor	TCGA-HC-8265-01	66	MALE
TCGA-AA-3852-01A-01R-0905-07	COREAD	tumor	TCGA-AA-3852-01	88	MALE
TCGA-B9-4114-01A-01R-1193-07	KIRP	tumor	TCGA-B9-4114-01	49	MALE
TCGA-A8-A07Z-01A-11R-A00Z-07	BRCA	tumor	TCGA-A8-A07Z-01	85	FEMALE
TCGA-B8-4153-01B-11R-1672-07	KIRC	tumor	TCGA-B8-4153-01	74	MALE
TCGA-91-8496-01A-11R-2403-07	LUAD	tumor	TCGA-91-8496-01	63	FEMALE
TCGA-09-1673-01A-01R-1566-13	OV	tumor	TCGA-09-1673-01	50	FEMALE
TCGA-BQ-7058-01A-11R-1965-07	KIRP	tumor	TCGA-BQ-7058-01	81	MALE
TCGA-ZG-A9LZ-01A-11R-A41O-07	PRAD	tumor	TCGA-ZG-A9LZ-01	66	MALE
TCGA-A7-A3IZ-01A-11R-A213-07	BRCA	tumor	TCGA-A7-A3IZ-01	62	FEMALE
TCGA-B6-A0IJ-01A-11R-A034-07	BRCA	tumor	TCGA-B6-A0IJ-01	42	FEMALE
TCGA-T2-A6X0-01A-11R-A34R-07	HNSC	tumor	TCGA-T2-A6X0-01	49	MALE
TCGA-AB-2806-03A-01T-0734-13	LAML	tumor	TCGA-AB-2806-03	46	MALE
TCGA-55-6980-01A-11R-1949-07	LUAD	tumor	TCGA-55-6980-01	56	MALE
TCGA-B5-A5OC-01A-21R-A27V-07	UCEC	tumor	TCGA-B5-A5OC-01	71	FEMALE
TCGA-ET-A40R-01A-11R-A23N-07	THCA	tumor	TCGA-ET-A40R-01	24	FEMALE
TCGA-A4-A57E-01A-11R-A26U-07	KIRP	tumor	TCGA-A4-A57E-01	59	MALE
TCGA-12-5299-01A-02R-1849-01	GBM	tumor	TCGA-12-5299-01	56	FEMALE
TCGA-28-5216-01A-01R-1850-01	GBM	tumor	TCGA-28-5216-01	52	MALE
TCGA-BA-A6DD-01A-12R-A31N-07	HNSC	tumor	TCGA-BA-A6DD-01	44	MALE
TCGA-GM-A2DM-01A-11R-A180-07	BRCA	tumor	TCGA-GM-A2DM-01	57	FEMALE
TCGA-DJ-A2Q1-01A-22R-A19O-07	THCA	tumor	TCGA-DJ-A2Q1-01	44	FEMALE
TCGA-DK-A2I6-01A-12R-A18C-07	BLCA	tumor	TCGA-DK-A2I6-01	82	MALE
TCGA-E2-A15O-01A-11R-A115-07	BRCA	tumor	TCGA-E2-A15O-01	89	FEMALE
TCGA-13-1496-01A-01R-1565-13	OV	tumor	TCGA-13-1496-01	65	FEMALE
TCGA-EA-A50E-01A-21R-A26T-07	CESC	tumor	TCGA-EA-A50E-01	45	FEMALE
TCGA-B8-4154-01A-01R-1188-07	KIRC	tumor	TCGA-B8-4154-01	73	FEMALE
TCGA-XV-A9W2-01A-11R-A39D-07	SKCM	tumor	TCGA-XV-A9W2-01	81	MALE
TCGA-BG-A0MG-01A-21R-A104-07	UCEC	tumor	TCGA-BG-A0MG-01	73	FEMALE
TCGA-25-2400-01A-01R-1569-13	OV	tumor	TCGA-25-2400-01	76	FEMALE
TCGA-EL-A3ZN-01A-11R-A23N-07	THCA	tumor	TCGA-EL-A3ZN-01	28	FEMALE
TCGA-FI-A2CY-01A-11R-A17B-07	UCEC	tumor	TCGA-FI-A2CY-01	60	FEMALE
TCGA-V1-A9ZG-01A-11R-A41O-07	PRAD	tumor	TCGA-V1-A9ZG-01	64	MALE
TCGA-EE-A3AE-06A-11R-A18S-07	SKCM	tumor	TCGA-EE-A3AE-06	52	FEMALE
TCGA-BH-A1F8-01A-11R-A13Q-07	BRCA	tumor	TCGA-BH-A1F8-01	90	FEMALE
TCGA-EX-A3L1-01A-11R-A32Y-07	CESC	tumor	TCGA-EX-A3L1-01	32	FEMALE
TCGA-WQ-AB4B-01A-11R-A41C-07	LIHC	tumor	TCGA-WQ-AB4B-01	62	MALE
TCGA-DD-A73D-01A-12R-A32O-07	LIHC	tumor	TCGA-DD-A73D-01	68	FEMALE
TCGA-2Z-A9JG-01A-11R-A42S-07	KIRP	tumor	TCGA-2Z-A9JG-01	64	MALE
TCGA-G9-6362-01A-11R-1789-07	PRAD	tumor	TCGA-G9-6362-01	57	MALE
TCGA-GI-A2C9-01A-11R-A21T-07	BRCA	tumor	TCGA-GI-A2C9-01	58	FEMALE
TCGA-AB-2839-03A-01T-0734-13	LAML	tumor	TCGA-AB-2839-03	51	FEMALE
TCGA-AA-3955-01A-02R-1022-07	COREAD	tumor	TCGA-AA-3955-01	38	MALE
TCGA-CN-4722-01A-01R-1436-07	HNSC	tumor	TCGA-CN-4722-01	61	FEMALE
TCGA-CR-7364-01A-11R-2016-07	HNSC	tumor	TCGA-CR-7364-01	66	MALE
TCGA-DD-AACA-02B-11R-A41C-07	LIHC	tumor	TCGA-DD-AACA-02	65	MALE
TCGA-83-5908-01A-21R-2287-07	LUAD	tumor	TCGA-83-5908-01	59	FEMALE
TCGA-DJ-A3UN-01A-11R-A22L-07	THCA	tumor	TCGA-DJ-A3UN-01	51	FEMALE
TCGA-EM-A4FO-01A-11R-A250-07	THCA	tumor	TCGA-EM-A4FO-01	72	MALE
TCGA-4Z-AA84-01A-11R-A39I-07	BLCA	tumor	TCGA-4Z-AA84-01	61	MALE
TCGA-CS-6669-01A-11R-1896-07	LGG	tumor	TCGA-CS-6669-01	26	FEMALE
TCGA-EE-A2GU-06A-11R-A18T-07	SKCM	tumor	TCGA-EE-A2GU-06	65	FEMALE
TCGA-25-1628-01A-01R-1566-13	OV	tumor	TCGA-25-1628-01	67	FEMALE
TCGA-13-1404-01A-01R-1565-13	OV	tumor	TCGA-13-1404-01	48	FEMALE
TCGA-B5-A0K8-01A-11R-A14M-07	UCEC	tumor	TCGA-B5-A0K8-01	71	FEMALE
TCGA-61-2097-01A-02R-1568-13	OV	tumor	TCGA-61-2097-01	71	FEMALE
TCGA-FG-A87Q-01A-11R-A36H-07	LGG	tumor	TCGA-FG-A87Q-01	61	FEMALE
TCGA-G9-A9S7-01A-11R-A41O-07	PRAD	tumor	TCGA-G9-A9S7-01	55	MALE
TCGA-DD-A11D-01A-11R-A131-07	LIHC	tumor	TCGA-DD-A11D-01	57	FEMALE
TCGA-FY-A4B0-01A-21R-A23W-07	THCA	tumor	TCGA-FY-A4B0-01	76	MALE
TCGA-KL-8329-01A-11R-2315-07	KICH	tumor	TCGA-KL-8329-01	57	FEMALE
TCGA-HT-8108-01A-11R-2404-07	LGG	tumor	TCGA-HT-8108-01	26	FEMALE
TCGA-AR-A1AK-01A-21R-A12P-07	BRCA	tumor	TCGA-AR-A1AK-01	70	FEMALE
TCGA-BR-A4J2-01A-21R-A251-31	STAD	tumor	TCGA-BR-A4J2-01	70.89	MALE
TCGA-E2-A14P-01A-31R-A12D-07	BRCA	tumor	TCGA-E2-A14P-01	79	FEMALE
TCGA-DU-6399-01A-12R-1708-07	LGG	tumor	TCGA-DU-6399-01	54	MALE
TCGA-BH-A1EN-01A-11R-A13Q-07	BRCA	tumor	TCGA-BH-A1EN-01	78	FEMALE
TCGA-AC-A3QQ-01A-11R-A22K-07	BRCA	tumor	TCGA-AC-A3QQ-01	54	FEMALE
TCGA-CE-A3MD-01A-11R-A20F-07	THCA	tumor	TCGA-CE-A3MD-01	31	MALE
TCGA-24-2035-01A-01R-1568-13	OV	tumor	TCGA-24-2035-01	65	FEMALE
TCGA-CC-A7IE-01A-21R-A38B-07	LIHC	tumor	TCGA-CC-A7IE-01	57	MALE
TCGA-24-0979-01A-01R-1565-13	OV	tumor	TCGA-24-0979-01	53	FEMALE
TCGA-32-1970-01A-01R-1850-01	GBM	tumor	TCGA-32-1970-01	59	MALE
TCGA-DA-A1I5-06A-11R-A18T-07	SKCM	tumor	TCGA-DA-A1I5-06	27	FEMALE
TCGA-DI-A1BU-01A-11R-A137-07	UCEC	tumor	TCGA-DI-A1BU-01	55	FEMALE
TCGA-BR-8297-01A-12R-2343-13	STAD	tumor	TCGA-BR-8297-01	58.11	MALE
TCGA-13-0801-01A-01R-1564-13	OV	tumor	TCGA-13-0801-01	46	FEMALE
TCGA-J4-A83N-01A-11R-A352-07	PRAD	tumor	TCGA-J4-A83N-01	57	MALE
TCGA-DM-A1DA-01A-11R-A155-07	COREAD	tumor	TCGA-DM-A1DA-01	71	FEMALE
TCGA-AR-A0TR-01A-11R-A084-07	BRCA	tumor	TCGA-AR-A0TR-01	68	FEMALE
TCGA-C8-A132-01A-31R-A115-07	BRCA	tumor	TCGA-C8-A132-01	56	FEMALE
TCGA-GL-A59R-01A-11R-A26U-07	KIRP	tumor	TCGA-GL-A59R-01	79	MALE
TCGA-DF-A2KZ-01A-11R-A213-07	UCEC	tumor	TCGA-DF-A2KZ-01	87	FEMALE
TCGA-5P-A9KE-01A-11R-A42S-07	KIRP	tumor	TCGA-5P-A9KE-01	70	MALE
TCGA-BP-4975-01A-01R-1334-07	KIRC	tumor	TCGA-BP-4975-01	40	MALE
TCGA-20-1683-01A-01R-1566-13	OV	tumor	TCGA-20-1683-01	65	FEMALE
TCGA-QK-AA3J-01A-11R-A39I-07	HNSC	tumor	TCGA-QK-AA3J-01	69	MALE
TCGA-EL-A3ZH-01A-31R-A23N-07	THCA	tumor	TCGA-EL-A3ZH-01	42	FEMALE
TCGA-CV-6939-01A-11R-1915-07	HNSC	tumor	TCGA-CV-6939-01	60	MALE
TCGA-EW-A1OV-01A-11R-A144-07	BRCA	tumor	TCGA-EW-A1OV-01	56	FEMALE
TCGA-44-6774-01A-21R-1858-07	LUAD	tumor	TCGA-44-6774-01	56	FEMALE
TCGA-EB-A3XD-01A-22R-A239-07	SKCM	tumor	TCGA-EB-A3XD-01	53	FEMALE
TCGA-A2-A3XV-01A-21R-A239-07	BRCA	tumor	TCGA-A2-A3XV-01	46	FEMALE
TCGA-BP-5181-01A-01R-1426-07	KIRC	tumor	TCGA-BP-5181-01	58	FEMALE
TCGA-CZ-5454-01A-01R-1503-07	KIRC	tumor	TCGA-CZ-5454-01	63	MALE
TCGA-DJ-A2PW-01A-11R-A19O-07	THCA	tumor	TCGA-DJ-A2PW-01	65	MALE
TCGA-BS-A0V6-01A-11R-A118-07	UCEC	tumor	TCGA-BS-A0V6-01	55	FEMALE
TCGA-BF-AAP8-01A-11R-A40A-07	SKCM	tumor	TCGA-BF-AAP8-01	58	MALE
TCGA-44-3917-01B-02R-A277-07	LUAD	tumor	TCGA-44-3917-01	33	FEMALE
TCGA-MM-A564-01A-11R-A266-07	KIRC	tumor	TCGA-MM-A564-01	68	MALE
TCGA-DH-5141-01A-01R-1470-07	LGG	tumor	TCGA-DH-5141-01	32	MALE
TCGA-B0-4843-01A-01R-1277-07	KIRC	tumor	TCGA-B0-4843-01	57	MALE
TCGA-AA-3976-01A-01R-1022-07	COREAD	tumor	TCGA-AA-3976-01	70	MALE
TCGA-BH-A1EU-01A-11R-A137-07	BRCA	tumor	TCGA-BH-A1EU-01	83	FEMALE
TCGA-EL-A3CR-01A-12R-A206-07	THCA	tumor	TCGA-EL-A3CR-01	78	FEMALE
TCGA-2F-A9KT-01A-11R-A38B-07	BLCA	tumor	TCGA-2F-A9KT-01	83	MALE
TCGA-EY-A3L3-01A-11R-A22K-07	UCEC	tumor	TCGA-EY-A3L3-01	82	FEMALE
TCGA-ZF-A9R0-01A-11R-A38B-07	BLCA	tumor	TCGA-ZF-A9R0-01	82	MALE
TCGA-DK-A1AE-01A-11R-A13Y-07	BLCA	tumor	TCGA-DK-A1AE-01	84	MALE
TCGA-19-2620-01A-01R-1850-01	GBM	tumor	TCGA-19-2620-01	70	MALE
TCGA-CV-7429-01A-11R-2132-07	HNSC	tumor	TCGA-CV-7429-01	55	MALE
TCGA-CC-5262-01A-01R-A131-07	LIHC	tumor	TCGA-CC-5262-01	67	MALE
TCGA-D7-A4Z0-01A-22R-A251-31	STAD	tumor	TCGA-D7-A4Z0-01	60.58	FEMALE
TCGA-AX-A0IZ-01A-11R-A118-07	UCEC	tumor	TCGA-AX-A0IZ-01	53	FEMALE
TCGA-HT-7880-01A-11R-2403-07	LGG	tumor	TCGA-HT-7880-01	30	MALE
TCGA-FA-A86F-01A-11R-A38C-07	DLBC	tumor	TCGA-FA-A86F-01	64	FEMALE
TCGA-KC-A4BR-01A-32R-A32Y-07	PRAD	tumor	TCGA-KC-A4BR-01	75	MALE
TCGA-BJ-A28Z-01A-11R-A16R-07	THCA	tumor	TCGA-BJ-A28Z-01	46	FEMALE
TCGA-B5-A3S1-01A-11R-A22K-07	UCEC	tumor	TCGA-B5-A3S1-01	71	FEMALE
TCGA-44-2656-01A-02R-A278-07	LUAD	tumor	TCGA-44-2656-01	59	MALE
TCGA-EK-A2PG-01A-11R-A18M-07	CESC	tumor	TCGA-EK-A2PG-01	88	FEMALE
TCGA-D7-A6EV-01A-11R-A31P-31	STAD	tumor	TCGA-D7-A6EV-01	71	FEMALE
TCGA-66-2790-01A-01R-0980-07	LUSC	tumor	TCGA-66-2790-01	72	MALE
TCGA-E2-A1L9-01A-11R-A13Q-07	BRCA	tumor	TCGA-E2-A1L9-01	40	FEMALE
TCGA-Q1-A6DT-01A-11R-A32P-07	CESC	tumor	TCGA-Q1-A6DT-01	55	FEMALE
TCGA-EL-A3CL-01A-11R-A19O-07	THCA	tumor	TCGA-EL-A3CL-01	70	FEMALE
TCGA-F4-6854-01A-11R-1928-07	COREAD	tumor	TCGA-F4-6854-01	77	FEMALE
TCGA-EY-A215-01A-11R-A14M-07	UCEC	tumor	TCGA-EY-A215-01	60	FEMALE
TCGA-BR-4187-01A-01R-1131-13	STAD	tumor	TCGA-BR-4187-01	56.49	MALE
TCGA-D8-A1JE-01A-11R-A13Q-07	BRCA	tumor	TCGA-D8-A1JE-01	62	FEMALE
TCGA-CR-7367-01A-11R-2016-07	HNSC	tumor	TCGA-CR-7367-01	52	MALE
TCGA-D7-6817-01A-11R-1884-13	STAD	tumor	TCGA-D7-6817-01	63.36	MALE
TCGA-S9-A7QZ-01A-12R-A34R-07	LGG	tumor	TCGA-S9-A7QZ-01	41	MALE
TCGA-E2-A1B0-01A-11R-A12P-07	BRCA	tumor	TCGA-E2-A1B0-01	50	FEMALE
TCGA-BR-8289-01A-11R-2343-13	STAD	tumor	TCGA-BR-8289-01	57.08	MALE
TCGA-CC-A9FS-01A-11R-A37K-07	LIHC	tumor	TCGA-CC-A9FS-01	55	MALE
TCGA-EB-A41B-01A-11R-A24X-07	SKCM	tumor	TCGA-EB-A41B-01	76	FEMALE
TCGA-22-4604-01A-01R-1201-07	LUSC	tumor	TCGA-22-4604-01	73	MALE
TCGA-12-3653-01A-01R-1849-01	GBM	tumor	TCGA-12-3653-01	34	FEMALE
TCGA-AR-A2LE-01A-11R-A180-07	BRCA	tumor	TCGA-AR-A2LE-01	69	FEMALE
TCGA-SJ-A6ZI-01A-12R-A34R-07	UCEC	tumor	TCGA-SJ-A6ZI-01	64	FEMALE
TCGA-95-7947-01A-11R-2187-07	LUAD	tumor	TCGA-95-7947-01	67	MALE
TCGA-AB-2982-03B-01T-0748-13	LAML	tumor	TCGA-AB-2982-03	29	FEMALE
TCGA-BW-A5NO-01A-11R-A27V-07	LIHC	tumor	TCGA-BW-A5NO-01	50	MALE
TCGA-CV-A6JY-01A-11R-A31N-07	HNSC	tumor	TCGA-CV-A6JY-01	69	MALE
TCGA-ET-A3BX-01A-11R-A19O-07	THCA	tumor	TCGA-ET-A3BX-01	24	MALE
TCGA-BJ-A0Z0-01A-11R-A10U-07	THCA	tumor	TCGA-BJ-A0Z0-01	55	MALE
TCGA-86-6562-01A-11R-1755-07	LUAD	tumor	TCGA-86-6562-01	52	MALE
TCGA-95-7562-01A-11R-2241-07	LUAD	tumor	TCGA-95-7562-01	71	MALE
TCGA-LA-A7SW-01A-11R-A405-07	LUSC	tumor	TCGA-LA-A7SW-01	71	MALE
TCGA-B6-A0RL-01A-11R-A084-07	BRCA	tumor	TCGA-B6-A0RL-01	60	FEMALE
TCGA-22-1011-01A-01R-0692-07	LUSC	tumor	TCGA-22-1011-01	73	MALE
TCGA-KN-8422-01A-11R-2315-07	KICH	tumor	TCGA-KN-8422-01	28	FEMALE
TCGA-A5-A3LO-01A-11R-A22K-07	UCEC	tumor	TCGA-A5-A3LO-01	64	FEMALE
TCGA-CD-A4MJ-01A-11R-A251-31	STAD	tumor	TCGA-CD-A4MJ-01	60.05	MALE
TCGA-39-5027-01A-21R-1820-07	LUSC	tumor	TCGA-39-5027-01	73	MALE
TCGA-R5-A7O7-01A-11R-A33Y-31	STAD	tumor	TCGA-R5-A7O7-01	51	MALE
TCGA-38-4629-01A-02R-1206-07	LUAD	tumor	TCGA-38-4629-01	68	MALE
TCGA-AA-3692-01A-01R-0905-07	COREAD	tumor	TCGA-AA-3692-01	47	FEMALE
TCGA-CW-6088-01A-11R-1672-07	KIRC	tumor	TCGA-CW-6088-01	60	MALE
TCGA-44-5645-01B-04R-A277-07	LUAD	tumor	TCGA-44-5645-01	61	FEMALE
TCGA-DK-AA6W-01A-12R-A39I-07	BLCA	tumor	TCGA-DK-AA6W-01	78	MALE
TCGA-29-1769-01A-01R-1567-13	OV	tumor	TCGA-29-1769-01	40	FEMALE
TCGA-CF-A1HR-01A-11R-A13Y-07	BLCA	tumor	TCGA-CF-A1HR-01	62	MALE
TCGA-HU-A4H6-01A-11R-A251-31	STAD	tumor	TCGA-HU-A4H6-01	72.4	FEMALE
TCGA-DS-A1OC-01A-11R-A14Y-07	CESC	tumor	TCGA-DS-A1OC-01	47	FEMALE
TCGA-F7-A50G-01A-11R-A266-07	HNSC	tumor	TCGA-F7-A50G-01	66	MALE
TCGA-BT-A20T-01A-11R-A14Y-07	BLCA	tumor	TCGA-BT-A20T-01	64	MALE
TCGA-AC-A2BM-01A-11R-A21T-07	BRCA	tumor	TCGA-AC-A2BM-01	41	FEMALE
TCGA-DU-6410-01A-11R-1896-07	LGG	tumor	TCGA-DU-6410-01	56	MALE
TCGA-F7-A61S-01A-11R-A28V-07	HNSC	tumor	TCGA-F7-A61S-01	62	MALE
TCGA-5P-A9JU-01A-11R-A42S-07	KIRP	tumor	TCGA-5P-A9JU-01	81	MALE
TCGA-DJ-A1QO-01A-11R-A14Y-07	THCA	tumor	TCGA-DJ-A1QO-01	69	MALE
TCGA-DS-A0VM-01A-11R-A10U-07	CESC	tumor	TCGA-DS-A0VM-01	51	FEMALE
TCGA-BH-A0W5-01A-11R-A109-07	BRCA	tumor	TCGA-BH-A0W5-01	77	FEMALE
TCGA-AG-3726-01A-02R-0905-07	COREAD	tumor	TCGA-AG-3726-01	63	FEMALE
TCGA-D8-A1JL-01A-11R-A13Q-07	BRCA	tumor	TCGA-D8-A1JL-01	72	FEMALE
TCGA-FF-A7CW-01A-11R-A38C-07	DLBC	tumor	TCGA-FF-A7CW-01	72	MALE
TCGA-VP-A87B-01A-11R-A352-07	PRAD	tumor	TCGA-VP-A87B-01	63	MALE
TCGA-B6-A0WW-01A-11R-A109-07	BRCA	tumor	TCGA-B6-A0WW-01	58	FEMALE
TCGA-B5-A121-01A-31R-A118-07	UCEC	tumor	TCGA-B5-A121-01	57	FEMALE
TCGA-VQ-A8PE-01A-11R-A414-31	STAD	tumor	TCGA-VQ-A8PE-01	78	MALE
TCGA-B0-5402-01A-01R-1503-07	KIRC	tumor	TCGA-B0-5402-01	64	MALE
TCGA-EL-A4KH-01A-11R-A250-07	THCA	tumor	TCGA-EL-A4KH-01	36	FEMALE
TCGA-66-2777-01A-01R-1201-07	LUSC	tumor	TCGA-66-2777-01	71	MALE
TCGA-DD-A4NB-01A-12R-A266-07	LIHC	tumor	TCGA-DD-A4NB-01	25	MALE
TCGA-EO-A3AY-01A-12R-A19W-07	UCEC	tumor	TCGA-EO-A3AY-01	58	FEMALE
TCGA-EM-A3AP-01A-12R-A20F-07	THCA	tumor	TCGA-EM-A3AP-01	31	FEMALE
TCGA-56-7823-01B-11R-2247-07	LUSC	tumor	TCGA-56-7823-01	58	FEMALE
TCGA-F5-6464-01A-11R-1736-07	COREAD	tumor	TCGA-F5-6464-01	77	FEMALE
TCGA-FG-5965-02B-11R-A29R-07	LGG	tumor	TCGA-FG-5965-02	39	FEMALE
TCGA-AB-3011-03A-01T-0736-13	LAML	tumor	TCGA-AB-3011-03	21	FEMALE
TCGA-55-7726-01A-11R-2170-07	LUAD	tumor	TCGA-55-7726-01	72	FEMALE
TCGA-AA-3555-01A-01R-0821-07	COREAD	tumor	TCGA-AA-3555-01	81	FEMALE
TCGA-EE-A3JE-06A-11R-A20F-07	SKCM	tumor	TCGA-EE-A3JE-06	75	MALE
TCGA-55-6987-01A-11R-1949-07	LUAD	tumor	TCGA-55-6987-01	77	MALE
TCGA-AA-3548-01A-01R-1873-07	COREAD	tumor	TCGA-AA-3548-01	71	FEMALE
TCGA-WE-A8ZX-06A-11R-A37K-07	SKCM	tumor	TCGA-WE-A8ZX-06	45	MALE
TCGA-CH-5789-01A-11R-1580-07	PRAD	tumor	TCGA-CH-5789-01	61	MALE
TCGA-AN-A046-01A-21R-A034-07	BRCA	tumor	TCGA-AN-A046-01	68	FEMALE
TCGA-H2-A3RH-01A-11R-A220-07	THCA	tumor	TCGA-H2-A3RH-01	41	FEMALE
TCGA-CJ-4884-01A-01R-1305-07	KIRC	tumor	TCGA-CJ-4884-01	72	FEMALE
TCGA-AJ-A3OK-01A-12R-A22K-07	UCEC	tumor	TCGA-AJ-A3OK-01	73	FEMALE
TCGA-04-1347-01A-01R-1564-13	OV	tumor	TCGA-04-1347-01	81	FEMALE
TCGA-CN-A63U-01A-11R-A30B-07	HNSC	tumor	TCGA-CN-A63U-01	50	MALE
TCGA-C5-A902-01A-11R-A37O-07	CESC	tumor	TCGA-C5-A902-01	35	FEMALE
TCGA-KS-A41J-01A-11R-A23N-07	THCA	tumor	TCGA-KS-A41J-01	28	FEMALE
TCGA-AZ-6598-01A-11R-1774-07	COREAD	tumor	TCGA-AZ-6598-01	77	FEMALE
TCGA-DS-A0VK-01A-21R-A10U-07	CESC	tumor	TCGA-DS-A0VK-01	45	FEMALE
TCGA-HT-8018-01A-11R-2404-07	LGG	tumor	TCGA-HT-8018-01	40	FEMALE
TCGA-VS-A8EJ-01A-11R-A37O-07	CESC	tumor	TCGA-VS-A8EJ-01	60	FEMALE
TCGA-FS-A4F8-06A-11R-A266-07	SKCM	tumor	TCGA-FS-A4F8-06	52	MALE
TCGA-UF-A7JC-01A-21R-A34R-07	HNSC	tumor	TCGA-UF-A7JC-01	42	MALE
TCGA-DB-A75M-01A-11R-A32Q-07	LGG	tumor	TCGA-DB-A75M-01	47	MALE
TCGA-BH-A0C1-01B-11R-A12D-07	BRCA	tumor	TCGA-BH-A0C1-01	61	FEMALE
TCGA-MY-A913-01A-11R-A37O-07	CESC	tumor	TCGA-MY-A913-01	28	FEMALE
TCGA-BH-A1EV-01A-11R-A137-07	BRCA	tumor	TCGA-BH-A1EV-01	45	FEMALE
TCGA-B0-4838-01A-01R-1305-07	KIRC	tumor	TCGA-B0-4838-01	69	FEMALE
TCGA-AL-3466-01A-02R-1351-07	KIRP	tumor	TCGA-AL-3466-01	41	MALE
TCGA-AH-6549-01A-11R-1830-07	COREAD	tumor	TCGA-AH-6549-01	66	MALE
TCGA-ZF-A9R9-01A-11R-A38B-07	BLCA	tumor	TCGA-ZF-A9R9-01	58	MALE
TCGA-BK-A0C9-01A-11R-A00V-07	UCEC	tumor	TCGA-BK-A0C9-01	57	FEMALE
TCGA-BP-5174-01A-01R-1426-07	KIRC	tumor	TCGA-BP-5174-01	45	FEMALE
TCGA-FU-A2QG-01A-11R-A18M-07	CESC	tumor	TCGA-FU-A2QG-01	29	FEMALE
TCGA-AB-2888-03B-01T-0748-13	LAML	tumor	TCGA-AB-2888-03	57	MALE
TCGA-AX-A05S-01A-11R-A00V-07	UCEC	tumor	TCGA-AX-A05S-01	81	FEMALE
TCGA-BH-A0DH-01A-11R-A084-07	BRCA	tumor	TCGA-BH-A0DH-01	63	FEMALE
TCGA-D9-A6EG-06A-12R-A32P-07	SKCM	tumor	TCGA-D9-A6EG-06	56	MALE
TCGA-B0-5084-01A-01R-1334-07	KIRC	tumor	TCGA-B0-5084-01	33	MALE
TCGA-CC-A9FV-01A-11R-A37K-07	LIHC	tumor	TCGA-CC-A9FV-01	57	MALE
TCGA-ER-A197-06A-32R-A18S-07	SKCM	tumor	TCGA-ER-A197-06	83	FEMALE
TCGA-06-0211-01B-01R-1849-01	GBM	tumor	TCGA-06-0211-01	47	MALE
TCGA-EM-A3O8-01A-11R-A220-07	THCA	tumor	TCGA-EM-A3O8-01	33	FEMALE
TCGA-BR-8682-01A-11R-2402-13	STAD	tumor	TCGA-BR-8682-01	52.47	MALE
TCGA-FE-A239-01A-11R-A16R-07	THCA	tumor	TCGA-FE-A239-01	82	MALE
TCGA-FJ-A871-01A-11R-A352-07	BLCA	tumor	TCGA-FJ-A871-01	49	MALE
TCGA-EJ-5499-01A-01R-1580-07	PRAD	tumor	TCGA-EJ-5499-01	61	MALE
TCGA-XK-AAJR-01A-11R-A41O-07	PRAD	tumor	TCGA-XK-AAJR-01	61	MALE
TCGA-49-AARQ-01A-11R-A41B-07	LUAD	tumor	TCGA-49-AARQ-01	41	FEMALE
TCGA-FG-A60K-01A-11R-A29R-07	LGG	tumor	TCGA-FG-A60K-01	34	FEMALE
TCGA-KS-A4ID-01A-11R-A250-07	THCA	tumor	TCGA-KS-A4ID-01	55	FEMALE
TCGA-E9-A3HO-01A-11R-A213-07	BRCA	tumor	TCGA-E9-A3HO-01	49	FEMALE
TCGA-IN-A6RJ-01A-21R-A33Y-31	STAD	tumor	TCGA-IN-A6RJ-01	64	MALE
TCGA-MN-A4N1-01A-11R-A24X-07	LUAD	tumor	TCGA-MN-A4N1-01	60	MALE
TCGA-BG-A18B-01A-11R-A12I-07	UCEC	tumor	TCGA-BG-A18B-01	53	FEMALE
TCGA-AR-A0U0-01A-11R-A109-07	BRCA	tumor	TCGA-AR-A0U0-01	73	FEMALE
TCGA-E9-A1ND-01A-11R-A144-07	BRCA	tumor	TCGA-E9-A1ND-01	75	FEMALE
TCGA-90-7767-01A-11R-2125-07	LUSC	tumor	TCGA-90-7767-01	56	MALE
TCGA-25-2398-01A-01R-1569-13	OV	tumor	TCGA-25-2398-01	71	FEMALE
TCGA-B0-4699-01A-01R-1277-07	KIRC	tumor	TCGA-B0-4699-01	74	MALE
TCGA-A5-A1OH-01A-21R-A22K-07	UCEC	tumor	TCGA-A5-A1OH-01	86	FEMALE
TCGA-A3-3323-01A-02R-1325-07	KIRC	tumor	TCGA-A3-3323-01	53	MALE
TCGA-06-0211-02A-02R-2005-01	GBM	tumor	TCGA-06-0211-02	47	MALE
TCGA-BG-A0LW-01A-11R-A16W-07	UCEC	tumor	TCGA-BG-A0LW-01	47	FEMALE
TCGA-FV-A495-01A-11R-A266-07	LIHC	tumor	TCGA-FV-A495-01	51	FEMALE
TCGA-EY-A2OP-01A-11R-A19W-07	UCEC	tumor	TCGA-EY-A2OP-01	63	FEMALE
TCGA-ET-A40P-01A-11R-A23N-07	THCA	tumor	TCGA-ET-A40P-01	32	FEMALE
TCGA-56-A5DS-01A-11R-A27Q-07	LUSC	tumor	TCGA-56-A5DS-01	72	FEMALE
TCGA-EK-A2RO-01A-11R-A18M-07	CESC	tumor	TCGA-EK-A2RO-01	59	FEMALE
TCGA-AB-2863-03A-01T-0734-13	LAML	tumor	TCGA-AB-2863-03	63	MALE
TCGA-23-1023-01R-01R-1564-13	OV	tumor	TCGA-23-1023-01	65	FEMALE
TCGA-94-8490-01A-11R-2326-07	LUSC	tumor	TCGA-94-8490-01	70	MALE
TCGA-DH-5143-01A-01R-1470-07	LGG	tumor	TCGA-DH-5143-01	30	MALE
TCGA-HU-A4GY-01A-21R-A24K-31	STAD	tumor	TCGA-HU-A4GY-01	76.97	FEMALE
TCGA-DD-A118-01A-11R-A131-07	LIHC	tumor	TCGA-DD-A118-01	77	FEMALE
TCGA-BR-A4J1-01A-11R-A251-31	STAD	tumor	TCGA-BR-A4J1-01	63.7	MALE
TCGA-DD-A73G-01A-22R-A32O-07	LIHC	tumor	TCGA-DD-A73G-01	73	FEMALE
TCGA-60-2725-01A-01R-1201-07	LUSC	tumor	TCGA-60-2725-01	74	MALE
TCGA-ZF-A9RC-01A-11R-A38B-07	BLCA	tumor	TCGA-ZF-A9RC-01	77	MALE
TCGA-AR-A1AX-01A-11R-A12P-07	BRCA	tumor	TCGA-AR-A1AX-01	64	FEMALE
TCGA-90-A59Q-01A-11R-A26W-07	LUSC	tumor	TCGA-90-A59Q-01	61	FEMALE
TCGA-HU-8602-01A-11R-2402-13	STAD	tumor	TCGA-HU-8602-01	58.92	FEMALE
TCGA-E9-A3X8-01A-31R-A22U-07	BRCA	tumor	TCGA-E9-A3X8-01	48	FEMALE
TCGA-A8-A07R-01A-21R-A034-07	BRCA	tumor	TCGA-A8-A07R-01	80	FEMALE
TCGA-BR-8687-01A-11R-2402-13	STAD	tumor	TCGA-BR-8687-01	67	FEMALE
TCGA-AP-A059-01A-21R-A118-07	UCEC	tumor	TCGA-AP-A059-01	69	FEMALE
TCGA-VQ-AA6K-01A-11R-A414-31	STAD	tumor	TCGA-VQ-AA6K-01	59	MALE
TCGA-NC-A5HJ-01A-11R-A26W-07	LUSC	tumor	TCGA-NC-A5HJ-01	59	MALE
TCGA-BF-A1Q0-01A-21R-A18S-07	SKCM	tumor	TCGA-BF-A1Q0-01	80	MALE
TCGA-ET-A3BT-01A-11R-A19O-07	THCA	tumor	TCGA-ET-A3BT-01	60	FEMALE
TCGA-IA-A40X-01A-11R-A24Z-07	KIRP	tumor	TCGA-IA-A40X-01	49	FEMALE
TCGA-AA-3971-01A-01R-1022-07	COREAD	tumor	TCGA-AA-3971-01	58	MALE
TCGA-CZ-4856-01A-02R-1426-07	KIRC	tumor	TCGA-CZ-4856-01	62	FEMALE
TCGA-H4-A2HQ-01A-11R-A180-07	BLCA	tumor	TCGA-H4-A2HQ-01	64	FEMALE
TCGA-D8-A1XU-01A-11R-A14M-07	BRCA	tumor	TCGA-D8-A1XU-01	56	FEMALE
TCGA-ET-A3BV-01A-11R-A19O-07	THCA	tumor	TCGA-ET-A3BV-01	47	FEMALE
TCGA-CH-5745-01A-11R-1580-07	PRAD	tumor	TCGA-CH-5745-01	68	MALE
TCGA-B0-5080-01A-01R-1503-07	KIRC	tumor	TCGA-B0-5080-01	63	MALE
TCGA-B2-3923-01A-02R-A277-07	KIRC	tumor	TCGA-B2-3923-01	59	MALE
TCGA-DM-A1HA-01A-11R-A155-07	COREAD	tumor	TCGA-DM-A1HA-01	82	MALE
TCGA-B0-4694-01A-01R-1277-07	KIRC	tumor	TCGA-B0-4694-01	72	MALE
TCGA-75-7025-01A-12R-1949-07	LUAD	tumor	TCGA-75-7025-01	1	MALE
TCGA-GS-A9U4-01A-11R-A39D-07	DLBC	tumor	TCGA-GS-A9U4-01	27	FEMALE
TCGA-ED-A66Y-01A-11R-A311-07	LIHC	tumor	TCGA-ED-A66Y-01	51	FEMALE
TCGA-22-4609-01A-21R-2125-07	LUSC	tumor	TCGA-22-4609-01	81	MALE
TCGA-24-1470-01A-01R-1566-13	OV	tumor	TCGA-24-1470-01	54	FEMALE
TCGA-44-4112-01B-06R-A277-07	LUAD	tumor	TCGA-44-4112-01	60	FEMALE
TCGA-F5-6702-01A-11R-1830-07	COREAD	tumor	TCGA-F5-6702-01	71	MALE
TCGA-EE-A2GO-06A-11R-A18S-07	SKCM	tumor	TCGA-EE-A2GO-06	66	FEMALE
TCGA-DU-7009-01A-11R-2027-07	LGG	tumor	TCGA-DU-7009-01	32	FEMALE
TCGA-CC-A3MC-01A-11R-A22L-07	LIHC	tumor	TCGA-CC-A3MC-01	54	MALE
TCGA-OR-A5LE-01A-11R-A29S-07	ACC	tumor	TCGA-OR-A5LE-01	14	MALE
TCGA-24-1562-01A-01R-1566-13	OV	tumor	TCGA-24-1562-01	67	FEMALE
TCGA-44-6147-01A-11R-A278-07	LUAD	tumor	TCGA-44-6147-01	67	FEMALE
TCGA-A5-A0GI-01A-11R-A040-07	UCEC	tumor	TCGA-A5-A0GI-01	63	FEMALE
TCGA-06-0130-01A-01R-1849-01	GBM	tumor	TCGA-06-0130-01	54	MALE
TCGA-24-1923-01A-01R-1567-13	OV	tumor	TCGA-24-1923-01	51	FEMALE
TCGA-D3-A1Q6-06A-11R-A18T-07	SKCM	tumor	TCGA-D3-A1Q6-06	55	MALE
TCGA-10-0933-01A-01R-1569-13	OV	tumor	TCGA-10-0933-01	77	FEMALE
TCGA-BG-A2L7-01A-11R-A18M-07	UCEC	tumor	TCGA-BG-A2L7-01	68	FEMALE
TCGA-CF-A3MG-01A-11R-A20F-07	BLCA	tumor	TCGA-CF-A3MG-01	48	MALE
TCGA-44-A479-01A-31R-A24H-07	LUAD	tumor	TCGA-44-A479-01	73	FEMALE
TCGA-D6-8569-01A-11R-2403-07	HNSC	tumor	TCGA-D6-8569-01	52	MALE
TCGA-44-2662-01B-02R-A277-07	LUAD	tumor	TCGA-44-2662-01	65	MALE
TCGA-DK-AA6R-01A-11R-A42T-07	BLCA	tumor	TCGA-DK-AA6R-01	68	MALE
TCGA-E1-A7Z6-01A-11R-A34R-07	LGG	tumor	TCGA-E1-A7Z6-01	41	FEMALE
TCGA-VS-A8QF-01A-21R-A37O-07	CESC	tumor	TCGA-VS-A8QF-01	42	FEMALE
TCGA-Y8-A897-01A-11R-A36F-07	KIRP	tumor	TCGA-Y8-A897-01	68	FEMALE
TCGA-HC-7737-01A-11R-2118-07	PRAD	tumor	TCGA-HC-7737-01	55	MALE
TCGA-94-7943-01A-11R-2187-07	LUSC	tumor	TCGA-94-7943-01	80	MALE
TCGA-AY-A8YK-01A-11R-A41B-07	COREAD	tumor	TCGA-AY-A8YK-01	44	MALE
TCGA-BP-4787-01A-01R-1305-07	KIRC	tumor	TCGA-BP-4787-01	59	FEMALE
TCGA-85-8049-01A-11R-2247-07	LUSC	tumor	TCGA-85-8049-01	57	MALE
TCGA-AD-6963-01A-11R-1928-07	COREAD	tumor	TCGA-AD-6963-01	58	MALE
TCGA-77-7138-01A-41R-2045-07	LUSC	tumor	TCGA-77-7138-01	67	MALE
TCGA-EJ-5515-01A-01R-1580-07	PRAD	tumor	TCGA-EJ-5515-01	60	MALE
TCGA-CJ-5676-01A-11R-1541-07	KIRC	tumor	TCGA-CJ-5676-01	47	MALE
TCGA-EE-A29E-06A-11R-A18T-07	SKCM	tumor	TCGA-EE-A29E-06	54	MALE
TCGA-J9-A52B-01A-11R-A26U-07	PRAD	tumor	TCGA-J9-A52B-01	62	MALE
TCGA-HT-7604-01A-11R-2090-07	LGG	tumor	TCGA-HT-7604-01	50	MALE
TCGA-P5-A5EV-01A-11R-A27Q-07	LGG	tumor	TCGA-P5-A5EV-01	39	MALE
TCGA-A6-4107-01A-02R-1410-07	COREAD	tumor	TCGA-A6-4107-01	57	FEMALE
TCGA-BP-4964-01A-01R-1334-07	KIRC	tumor	TCGA-BP-4964-01	54	FEMALE
TCGA-LL-A5YP-01A-21R-A28M-07	BRCA	tumor	TCGA-LL-A5YP-01	49	FEMALE
TCGA-EK-A3GJ-01A-21R-A213-07	CESC	tumor	TCGA-EK-A3GJ-01	51	FEMALE
TCGA-ZJ-AAX4-01A-11R-A42T-07	CESC	tumor	TCGA-ZJ-AAX4-01	85	FEMALE
TCGA-DJ-A3V6-01A-11R-A22U-07	THCA	tumor	TCGA-DJ-A3V6-01	NA	NA
TCGA-G3-A3CI-01A-11R-A213-07	LIHC	tumor	TCGA-G3-A3CI-01	71	MALE
TCGA-2A-A8VV-01A-11R-A37L-07	PRAD	tumor	TCGA-2A-A8VV-01	52	MALE
TCGA-DD-A3A8-01A-11R-A22L-07	LIHC	tumor	TCGA-DD-A3A8-01	75	MALE
TCGA-FU-A3EO-01A-11R-A213-07	CESC	tumor	TCGA-FU-A3EO-01	55	FEMALE
TCGA-D3-A51E-06A-11R-A266-07	SKCM	tumor	TCGA-D3-A51E-06	39	FEMALE
TCGA-23-1122-01A-01R-1565-13	OV	tumor	TCGA-23-1122-01	53	FEMALE
TCGA-BH-A18V-01A-11R-A12D-07	BRCA	tumor	TCGA-BH-A18V-01	48	FEMALE
TCGA-B0-5696-01A-11R-1541-07	KIRC	tumor	TCGA-B0-5696-01	69	MALE
TCGA-VP-A872-01A-11R-A352-07	PRAD	tumor	TCGA-VP-A872-01	60	MALE
TCGA-B8-5545-01A-01R-1672-07	KIRC	tumor	TCGA-B8-5545-01	42	MALE
TCGA-S9-A7QX-01A-11R-A34F-07	LGG	tumor	TCGA-S9-A7QX-01	36	FEMALE
TCGA-E9-A1RH-01A-21R-A169-07	BRCA	tumor	TCGA-E9-A1RH-01	63	FEMALE
TCGA-05-4395-01A-01R-1206-07	LUAD	tumor	TCGA-05-4395-01	76	MALE
TCGA-FY-A76V-01A-11R-A39I-07	THCA	tumor	TCGA-FY-A76V-01	54	MALE
TCGA-05-4249-01A-01R-1107-07	LUAD	tumor	TCGA-05-4249-01	67	MALE
TCGA-29-1774-01A-01R-1567-13	OV	tumor	TCGA-29-1774-01	82	FEMALE
TCGA-G4-6311-01A-11R-1723-07	COREAD	tumor	TCGA-G4-6311-01	80	MALE
TCGA-CC-5264-01A-01R-A131-07	LIHC	tumor	TCGA-CC-5264-01	71	MALE
TCGA-A4-A6HP-01A-11R-A31O-07	KIRP	tumor	TCGA-A4-A6HP-01	66	MALE
TCGA-MA-AA42-01A-12R-A38B-07	CESC	tumor	TCGA-MA-AA42-01	75	FEMALE
TCGA-2F-A9KP-01A-11R-A38B-07	BLCA	tumor	TCGA-2F-A9KP-01	66	MALE
TCGA-FE-A23A-01A-11R-A16R-07	THCA	tumor	TCGA-FE-A23A-01	27	FEMALE
TCGA-EY-A1GK-01A-11R-A13S-07	UCEC	tumor	TCGA-EY-A1GK-01	74	FEMALE
TCGA-24-1434-01A-01R-1566-13	OV	tumor	TCGA-24-1434-01	59	FEMALE
TCGA-CV-7236-01A-11R-2016-07	HNSC	tumor	TCGA-CV-7236-01	77	FEMALE
TCGA-05-4405-01A-21R-1858-07	LUAD	tumor	TCGA-05-4405-01	74	FEMALE
TCGA-CJ-4923-01A-01R-1426-07	KIRC	tumor	TCGA-CJ-4923-01	63	FEMALE
TCGA-EJ-A65D-01A-11R-A30B-07	PRAD	tumor	TCGA-EJ-A65D-01	66	MALE
TCGA-22-4593-01A-21R-1820-07	LUSC	tumor	TCGA-22-4593-01	77	MALE
TCGA-D8-A1XK-01A-21R-A14M-07	BRCA	tumor	TCGA-D8-A1XK-01	55	FEMALE
TCGA-C5-A1MP-01A-11R-A14Y-07	CESC	tumor	TCGA-C5-A1MP-01	34	FEMALE
TCGA-RQ-AAAT-01A-11R-A39D-07	DLBC	tumor	TCGA-RQ-AAAT-01	63	FEMALE
TCGA-IP-7968-01A-11R-2203-13	STAD	tumor	TCGA-IP-7968-01	74.24	MALE
TCGA-F5-6465-01A-11R-1736-07	COREAD	tumor	TCGA-F5-6465-01	64	FEMALE
TCGA-GN-A267-06A-21R-A18T-07	SKCM	tumor	TCGA-GN-A267-06	38	MALE
TCGA-D3-A8GD-06A-11R-A37K-07	SKCM	tumor	TCGA-D3-A8GD-06	63	FEMALE
TCGA-DZ-6135-01A-11R-1965-07	KIRP	tumor	TCGA-DZ-6135-01	45	MALE
TCGA-BP-4177-01A-02R-1420-07	KIRC	tumor	TCGA-BP-4177-01	65	MALE
TCGA-OL-A5RW-01A-11R-A28M-07	BRCA	tumor	TCGA-OL-A5RW-01	40	FEMALE
TCGA-37-4133-01A-01R-1100-07	LUSC	tumor	TCGA-37-4133-01	63	MALE
TCGA-AC-A5EH-01A-11R-A28M-07	BRCA	tumor	TCGA-AC-A5EH-01	76	FEMALE
TCGA-69-8453-01A-12R-2326-07	LUAD	tumor	TCGA-69-8453-01	77	MALE
TCGA-P5-A737-01A-11R-A32Q-07	LGG	tumor	TCGA-P5-A737-01	47	MALE
TCGA-21-1078-01A-01R-0692-07	LUSC	tumor	TCGA-21-1078-01	77	MALE
TCGA-60-2707-01A-01R-0851-07	LUSC	tumor	TCGA-60-2707-01	70	MALE
TCGA-OR-A5J6-01A-31R-A29S-07	ACC	tumor	TCGA-OR-A5J6-01	29	FEMALE
TCGA-EO-A3AZ-01A-12R-A19W-07	UCEC	tumor	TCGA-EO-A3AZ-01	80	FEMALE
TCGA-05-4402-01A-01R-1206-07	LUAD	tumor	TCGA-05-4402-01	57	FEMALE
TCGA-A8-A097-01A-11R-A034-07	BRCA	tumor	TCGA-A8-A097-01	65	FEMALE
TCGA-G4-6309-01A-21R-1839-07	COREAD	tumor	TCGA-G4-6309-01	40	FEMALE
TCGA-CV-6938-01A-11R-1915-07	HNSC	tumor	TCGA-CV-6938-01	87	MALE
TCGA-J8-A4HW-06A-11R-A250-07	THCA	tumor	TCGA-J8-A4HW-06	59	FEMALE
TCGA-NH-A6GA-01A-11R-A37K-07	COREAD	tumor	TCGA-NH-A6GA-01	58	MALE
TCGA-05-4396-01A-21R-1858-07	LUAD	tumor	TCGA-05-4396-01	76	MALE
TCGA-DI-A0WH-01A-12R-A12I-07	UCEC	tumor	TCGA-DI-A0WH-01	64	FEMALE
TCGA-CJ-5679-01A-11R-1541-07	KIRC	tumor	TCGA-CJ-5679-01	73	MALE
TCGA-G4-6299-01A-11R-1774-07	COREAD	tumor	TCGA-G4-6299-01	69	MALE
TCGA-EE-A29P-06A-11R-A18T-07	SKCM	tumor	TCGA-EE-A29P-06	73	FEMALE
TCGA-MI-A75H-01A-11R-A32O-07	LIHC	tumor	TCGA-MI-A75H-01	77	MALE
TCGA-CV-6952-01A-11R-1915-07	HNSC	tumor	TCGA-CV-6952-01	65	FEMALE
TCGA-HT-7473-01A-11R-2027-07	LGG	tumor	TCGA-HT-7473-01	28	MALE
TCGA-G7-6789-01A-11R-1965-07	KIRP	tumor	TCGA-G7-6789-01	53	FEMALE
TCGA-E7-A6ME-01A-22R-A32O-07	BLCA	tumor	TCGA-E7-A6ME-01	75	MALE
TCGA-E7-A678-01A-11R-A30C-07	BLCA	tumor	TCGA-E7-A678-01	55	MALE
TCGA-V1-A8WL-01A-11R-A37L-07	PRAD	tumor	TCGA-V1-A8WL-01	64	MALE
TCGA-13-1510-01A-02R-1565-13	OV	tumor	TCGA-13-1510-01	62	FEMALE
TCGA-AX-A2HJ-01A-11R-A17B-07	UCEC	tumor	TCGA-AX-A2HJ-01	35	FEMALE
TCGA-FD-A5BX-01A-11R-A26T-07	BLCA	tumor	TCGA-FD-A5BX-01	82	MALE
TCGA-A2-A4S1-01A-21R-A266-07	BRCA	tumor	TCGA-A2-A4S1-01	66	FEMALE
TCGA-DM-A28H-01A-11R-A16W-07	COREAD	tumor	TCGA-DM-A28H-01	50	MALE
TCGA-A6-2674-01A-02R-0821-07	COREAD	tumor	TCGA-A6-2674-01	71	MALE
TCGA-ZG-A8QZ-01A-11R-A37L-07	PRAD	tumor	TCGA-ZG-A8QZ-01	65	MALE
TCGA-CC-A8HT-01A-11R-A36F-07	LIHC	tumor	TCGA-CC-A8HT-01	74	MALE
TCGA-55-7728-01A-11R-2187-07	LUAD	tumor	TCGA-55-7728-01	64	FEMALE
TCGA-34-8454-01A-11R-2326-07	LUSC	tumor	TCGA-34-8454-01	62	FEMALE
TCGA-KL-8325-01A-11R-2315-07	KICH	tumor	TCGA-KL-8325-01	56	FEMALE
TCGA-AB-3001-03A-01T-0736-13	LAML	tumor	TCGA-AB-3001-03	31	FEMALE
TCGA-B0-5399-01A-01R-1503-07	KIRC	tumor	TCGA-B0-5399-01	46	MALE
TCGA-V1-A9OX-01A-11R-A41O-07	PRAD	tumor	TCGA-V1-A9OX-01	56	MALE
TCGA-QD-A8IV-01A-11R-A39I-07	THCA	tumor	TCGA-QD-A8IV-01	50	FEMALE
TCGA-MT-A67A-01A-11R-A30B-07	HNSC	tumor	TCGA-MT-A67A-01	85	FEMALE
TCGA-CS-5395-01A-01R-1470-07	LGG	tumor	TCGA-CS-5395-01	43	MALE
TCGA-CL-4957-01A-01R-1736-07	COREAD	tumor	TCGA-CL-4957-01	79	FEMALE
TCGA-ED-A97K-01A-21R-A38B-07	LIHC	tumor	TCGA-ED-A97K-01	54	MALE
TCGA-AB-2941-03A-01T-0740-13	LAML	tumor	TCGA-AB-2941-03	73	MALE
TCGA-DM-A288-01A-11R-A16W-07	COREAD	tumor	TCGA-DM-A288-01	68	MALE
TCGA-CV-6943-01A-11R-1915-07	HNSC	tumor	TCGA-CV-6943-01	74	MALE
TCGA-21-1077-01A-01R-0692-07	LUSC	tumor	TCGA-21-1077-01	64	MALE
TCGA-DV-5573-01A-01R-1541-07	KIRC	tumor	TCGA-DV-5573-01	41	MALE
TCGA-CZ-4866-01A-01R-1503-07	KIRC	tumor	TCGA-CZ-4866-01	79	FEMALE
TCGA-DD-AADO-01A-11R-A41C-07	LIHC	tumor	TCGA-DD-AADO-01	55	MALE
TCGA-FD-A62S-01A-11R-A30C-07	BLCA	tumor	TCGA-FD-A62S-01	60	FEMALE
TCGA-G9-6343-01A-21R-1965-07	PRAD	tumor	TCGA-G9-6343-01	62	MALE
TCGA-BH-A0DO-01B-11R-A12D-07	BRCA	tumor	TCGA-BH-A0DO-01	78	FEMALE
TCGA-92-8064-01A-11R-2247-07	LUSC	tumor	TCGA-92-8064-01	58	MALE
TCGA-DC-5337-01A-01R-1660-07	COREAD	tumor	TCGA-DC-5337-01	69	MALE
TCGA-66-2769-01A-02R-0851-07	LUSC	tumor	TCGA-66-2769-01	75	MALE
TCGA-85-A5B5-01A-21R-A26W-07	LUSC	tumor	TCGA-85-A5B5-01	58	MALE
TCGA-A2-A0EP-01A-52R-A22U-07	BRCA	tumor	TCGA-A2-A0EP-01	56	FEMALE
TCGA-CQ-A4CI-01A-11R-A266-07	HNSC	tumor	TCGA-CQ-A4CI-01	73	MALE
TCGA-FD-A5BZ-01A-11R-A28M-07	BLCA	tumor	TCGA-FD-A5BZ-01	77	FEMALE
TCGA-UF-A71E-01A-31R-A34R-07	HNSC	tumor	TCGA-UF-A71E-01	63	MALE
TCGA-24-1548-01A-01R-1566-13	OV	tumor	TCGA-24-1548-01	57	FEMALE
TCGA-D3-A3CC-06A-11R-A18S-07	SKCM	tumor	TCGA-D3-A3CC-06	69	FEMALE
TCGA-BR-8081-01A-11R-2343-13	STAD	tumor	TCGA-BR-8081-01	71.45	FEMALE
TCGA-66-2767-01A-01R-0851-07	LUSC	tumor	TCGA-66-2767-01	62	MALE
TCGA-DD-AACZ-01A-11R-A41C-07	LIHC	tumor	TCGA-DD-AACZ-01	63	FEMALE
TCGA-DJ-A2PU-01A-12R-A19O-07	THCA	tumor	TCGA-DJ-A2PU-01	52	FEMALE
TCGA-CH-5752-01A-11R-1580-07	PRAD	tumor	TCGA-CH-5752-01	66	MALE
TCGA-ZP-A9D1-01A-11R-A38B-07	LIHC	tumor	TCGA-ZP-A9D1-01	56	FEMALE
TCGA-P3-A6T3-01A-11R-A34R-07	HNSC	tumor	TCGA-P3-A6T3-01	49	MALE
TCGA-AX-A3FS-01A-11R-A22K-07	UCEC	tumor	TCGA-AX-A3FS-01	82	FEMALE
TCGA-FR-A726-01A-11R-A32P-07	SKCM	tumor	TCGA-FR-A726-01	90	MALE
TCGA-05-5428-01A-01R-1628-07	LUAD	tumor	TCGA-05-5428-01	57	MALE
TCGA-VQ-A8P3-01A-11R-A36D-31	STAD	tumor	TCGA-VQ-A8P3-01	72	MALE
TCGA-61-2094-01A-01R-1568-13	OV	tumor	TCGA-61-2094-01	63	FEMALE
TCGA-GN-A4U4-06A-11R-A32P-07	SKCM	tumor	TCGA-GN-A4U4-06	73	MALE
TCGA-BP-5190-01A-01R-1426-07	KIRC	tumor	TCGA-BP-5190-01	61	MALE
TCGA-23-1118-01A-01R-1564-13	OV	tumor	TCGA-23-1118-01	45	FEMALE
TCGA-73-4670-01A-01R-1206-07	LUAD	tumor	TCGA-73-4670-01	69	FEMALE
TCGA-DJ-A3UR-01A-11R-A22L-07	THCA	tumor	TCGA-DJ-A3UR-01	51	FEMALE
TCGA-BJ-A190-01A-11R-A13Y-07	THCA	tumor	TCGA-BJ-A190-01	55	MALE
TCGA-22-5491-01A-01R-1635-07	LUSC	tumor	TCGA-22-5491-01	74	MALE
TCGA-OL-A97C-01A-32R-A41B-07	BRCA	tumor	TCGA-OL-A97C-01	67	FEMALE
TCGA-CH-5794-01A-11R-1580-07	PRAD	tumor	TCGA-CH-5794-01	65	MALE
TCGA-A7-A26J-01A-11R-A277-07	BRCA	tumor	TCGA-A7-A26J-01	49	FEMALE
TCGA-55-6978-01A-11R-1949-07	LUAD	tumor	TCGA-55-6978-01	81	MALE
TCGA-HT-7858-01A-11R-2403-07	LGG	tumor	TCGA-HT-7858-01	28	MALE
TCGA-BG-A0M4-01A-11R-A104-07	UCEC	tumor	TCGA-BG-A0M4-01	60	FEMALE
TCGA-BP-5187-01A-01R-1426-07	KIRC	tumor	TCGA-BP-5187-01	54	MALE
TCGA-D3-A3BZ-06A-12R-A18S-07	SKCM	tumor	TCGA-D3-A3BZ-06	63	MALE
TCGA-EE-A2GI-06A-11R-A18T-07	SKCM	tumor	TCGA-EE-A2GI-06	39	MALE
TCGA-E1-A7YH-01A-11R-A34F-07	LGG	tumor	TCGA-E1-A7YH-01	47	FEMALE
TCGA-B8-A54E-01A-11R-A266-07	KIRC	tumor	TCGA-B8-A54E-01	62	FEMALE
TCGA-EL-A4K4-01A-11R-A250-07	THCA	tumor	TCGA-EL-A4K4-01	33	FEMALE
TCGA-78-7147-01A-11R-2039-07	LUAD	tumor	TCGA-78-7147-01	67	FEMALE
TCGA-B0-5099-01A-01R-1420-07	KIRC	tumor	TCGA-B0-5099-01	88	FEMALE
TCGA-B0-5085-01A-01R-1334-07	KIRC	tumor	TCGA-B0-5085-01	76	FEMALE
TCGA-14-0789-01A-01R-1849-01	GBM	tumor	TCGA-14-0789-01	54	MALE
TCGA-A8-A085-01A-11R-A00Z-07	BRCA	tumor	TCGA-A8-A085-01	44	MALE
TCGA-BH-A0HN-01A-11R-A10U-07	BRCA	tumor	TCGA-BH-A0HN-01	67	FEMALE
TCGA-BJ-A0ZH-01A-11R-A10U-07	THCA	tumor	TCGA-BJ-A0ZH-01	52	FEMALE
TCGA-BR-A4J6-01A-11R-A251-31	STAD	tumor	TCGA-BR-A4J6-01	69.21	FEMALE
TCGA-XV-AAZW-01A-12R-A40A-07	SKCM	tumor	TCGA-XV-AAZW-01	62	FEMALE
TCGA-DJ-A1QE-01A-21R-A14Y-07	THCA	tumor	TCGA-DJ-A1QE-01	62	FEMALE
TCGA-D8-A27I-01A-11R-A16F-07	BRCA	tumor	TCGA-D8-A27I-01	58	FEMALE
TCGA-K4-A3WV-01A-11R-A22U-07	BLCA	tumor	TCGA-K4-A3WV-01	78	FEMALE
TCGA-FS-A4F0-06A-11R-A24X-07	SKCM	tumor	TCGA-FS-A4F0-06	67	FEMALE
TCGA-AR-A24N-01A-11R-A169-07	BRCA	tumor	TCGA-AR-A24N-01	54	FEMALE
TCGA-CV-7102-01A-11R-2016-07	HNSC	tumor	TCGA-CV-7102-01	76	FEMALE
TCGA-58-8386-01A-11R-2296-07	LUSC	tumor	TCGA-58-8386-01	75	MALE
TCGA-AR-A5QP-01A-11R-A28M-07	BRCA	tumor	TCGA-AR-A5QP-01	54	FEMALE
TCGA-67-3770-01A-01R-0946-07	LUAD	tumor	TCGA-67-3770-01	70	FEMALE
TCGA-BK-A139-01C-08R-A277-07	UCEC	tumor	TCGA-BK-A139-01	74	FEMALE
TCGA-G2-AA3B-01A-11R-A39I-07	BLCA	tumor	TCGA-G2-AA3B-01	75	FEMALE
TCGA-A5-A2K4-01A-11R-A18M-07	UCEC	tumor	TCGA-A5-A2K4-01	69	FEMALE
TCGA-CF-A47V-01A-11R-A23W-07	BLCA	tumor	TCGA-CF-A47V-01	52	MALE
TCGA-BP-4765-01A-01R-1289-07	KIRC	tumor	TCGA-BP-4765-01	43	MALE
TCGA-CJ-4890-01A-01R-1305-07	KIRC	tumor	TCGA-CJ-4890-01	72	MALE
TCGA-E7-A7XN-01A-11R-A352-07	BLCA	tumor	TCGA-E7-A7XN-01	66	MALE
TCGA-N9-A4Q7-01A-11R-A28V-07	UCS	tumor	TCGA-N9-A4Q7-01	69	FEMALE
TCGA-AX-A1CI-01A-11R-A137-07	UCEC	tumor	TCGA-AX-A1CI-01	61	FEMALE
TCGA-53-A4EZ-01A-12R-A24X-07	LUAD	tumor	TCGA-53-A4EZ-01	63	MALE
TCGA-Y6-A8TL-01A-21R-A37L-07	PRAD	tumor	TCGA-Y6-A8TL-01	65	MALE
TCGA-B5-A0K4-01A-11R-A040-07	UCEC	tumor	TCGA-B5-A0K4-01	51	FEMALE
TCGA-25-1328-01A-01R-1565-13	OV	tumor	TCGA-25-1328-01	38	FEMALE
TCGA-BK-A6W3-01A-12R-A34R-07	UCEC	tumor	TCGA-BK-A6W3-01	34	FEMALE
TCGA-DD-A73E-01A-12R-A32O-07	LIHC	tumor	TCGA-DD-A73E-01	66	MALE
TCGA-BR-A452-01A-91R-A251-31	STAD	tumor	TCGA-BR-A452-01	57.79	MALE
TCGA-BT-A20W-01A-21R-A14Y-07	BLCA	tumor	TCGA-BT-A20W-01	71	MALE
TCGA-EK-A2RA-01A-11R-A18M-07	CESC	tumor	TCGA-EK-A2RA-01	74	FEMALE
TCGA-GN-A4U8-06A-11R-A32P-07	SKCM	tumor	TCGA-GN-A4U8-06	51	MALE
TCGA-FR-A7UA-06A-32R-A352-07	SKCM	tumor	TCGA-FR-A7UA-06	65	FEMALE
TCGA-AA-A02H-01A-01R-A089-07	COREAD	tumor	TCGA-AA-A02H-01	74	FEMALE
TCGA-BP-4167-01A-02R-1325-07	KIRC	tumor	TCGA-BP-4167-01	59	MALE
TCGA-CN-6012-01A-11R-1686-07	HNSC	tumor	TCGA-CN-6012-01	66	MALE
TCGA-A1-A0SM-01A-11R-A084-07	BRCA	tumor	TCGA-A1-A0SM-01	77	MALE
TCGA-VQ-A8PY-01A-11R-A414-31	STAD	tumor	TCGA-VQ-A8PY-01	47	FEMALE
TCGA-BP-5183-01A-01R-1426-07	KIRC	tumor	TCGA-BP-5183-01	57	MALE
TCGA-2Z-A9JM-01A-12R-A42S-07	KIRP	tumor	TCGA-2Z-A9JM-01	28	MALE
TCGA-DD-AAEA-01A-11R-A41C-07	LIHC	tumor	TCGA-DD-AAEA-01	65	MALE
TCGA-EL-A3H1-01A-11R-A21D-07	THCA	tumor	TCGA-EL-A3H1-01	66	FEMALE
TCGA-HR-A2OG-06A-21R-A18U-07	SKCM	tumor	TCGA-HR-A2OG-06	50	FEMALE
TCGA-FS-A1YY-06A-11R-A18T-07	SKCM	tumor	TCGA-FS-A1YY-06	55	FEMALE
TCGA-CQ-7065-01A-11R-2081-07	HNSC	tumor	TCGA-CQ-7065-01	40	MALE
TCGA-OR-A5K8-01A-11R-A29S-07	ACC	tumor	TCGA-OR-A5K8-01	39	MALE
TCGA-22-1000-01A-01R-A32Z-07	LUSC	tumor	TCGA-22-1000-01	76	MALE
TCGA-BA-A6DA-01A-31R-A31N-07	HNSC	tumor	TCGA-BA-A6DA-01	41	FEMALE
TCGA-A8-A0A1-01A-11R-A00Z-07	BRCA	tumor	TCGA-A8-A0A1-01	84	FEMALE
TCGA-AB-2844-03A-01T-0736-13	LAML	tumor	TCGA-AB-2844-03	63	MALE
TCGA-AP-A0LG-01A-11R-A16W-07	UCEC	tumor	TCGA-AP-A0LG-01	54	FEMALE
TCGA-CM-6169-01A-11R-1653-07	COREAD	tumor	TCGA-CM-6169-01	67	MALE
TCGA-A4-7583-01A-11R-A32Z-07	KIRP	tumor	TCGA-A4-7583-01	60	MALE
TCGA-VS-A9V0-01A-11R-A42T-07	CESC	tumor	TCGA-VS-A9V0-01	58	FEMALE
TCGA-FE-A237-01A-11R-A16R-07	THCA	tumor	TCGA-FE-A237-01	19	FEMALE
TCGA-CR-6481-01A-11R-1873-07	HNSC	tumor	TCGA-CR-6481-01	47	MALE
TCGA-BG-A187-01A-11R-A12I-07	UCEC	tumor	TCGA-BG-A187-01	65	FEMALE
TCGA-OR-A5K6-01A-11R-A29S-07	ACC	tumor	TCGA-OR-A5K6-01	56	FEMALE
TCGA-UZ-A9PL-01A-11R-A38C-07	KIRP	tumor	TCGA-UZ-A9PL-01	59	MALE
TCGA-UP-A6WW-01A-12R-A34R-07	HNSC	tumor	TCGA-UP-A6WW-01	58	MALE
TCGA-N8-A4PQ-01A-11R-A28V-07	UCS	tumor	TCGA-N8-A4PQ-01	76	FEMALE
TCGA-F5-6864-01A-11R-1928-07	COREAD	tumor	TCGA-F5-6864-01	74	FEMALE
TCGA-56-8504-01A-11R-2403-07	LUSC	tumor	TCGA-56-8504-01	74	MALE
TCGA-AR-A1AR-01A-31R-A137-07	BRCA	tumor	TCGA-AR-A1AR-01	50	FEMALE
TCGA-BF-AAP0-06A-11R-A39D-07	SKCM	tumor	TCGA-BF-AAP0-06	40	FEMALE
TCGA-85-8052-01A-11R-2247-07	LUSC	tumor	TCGA-85-8052-01	53	MALE
TCGA-B5-A11J-01A-11R-A118-07	UCEC	tumor	TCGA-B5-A11J-01	64	FEMALE
TCGA-CZ-4853-01A-01R-1426-07	KIRC	tumor	TCGA-CZ-4853-01	82	MALE
TCGA-EY-A1G8-01A-11R-A13S-07	UCEC	tumor	TCGA-EY-A1G8-01	83	FEMALE
TCGA-BG-A0W1-01A-12R-A109-07	UCEC	tumor	TCGA-BG-A0W1-01	89	FEMALE
TCGA-86-8280-01A-11R-2287-07	LUAD	tumor	TCGA-86-8280-01	54	FEMALE
TCGA-CC-A3MA-01A-11R-A213-07	LIHC	tumor	TCGA-CC-A3MA-01	61	MALE
TCGA-ER-A2NH-06A-11R-A18S-07	SKCM	tumor	TCGA-ER-A2NH-06	49	MALE
TCGA-13-1482-01A-01R-1565-13	OV	tumor	TCGA-13-1482-01	52	FEMALE
TCGA-D3-A8GK-06A-11R-A37K-07	SKCM	tumor	TCGA-D3-A8GK-06	45	MALE
TCGA-DS-A7WH-01A-22R-A352-07	CESC	tumor	TCGA-DS-A7WH-01	34	FEMALE
TCGA-J4-A6M7-01A-11R-A31N-07	PRAD	tumor	TCGA-J4-A6M7-01	53	MALE
TCGA-DD-AAVQ-01A-11R-A41C-07	LIHC	tumor	TCGA-DD-AAVQ-01	38	MALE
TCGA-J7-8537-01A-11R-2404-07	KIRP	tumor	TCGA-J7-8537-01	37	FEMALE
TCGA-FD-A5C1-01A-11R-A28M-07	BLCA	tumor	TCGA-FD-A5C1-01	61	FEMALE
TCGA-AG-3600-01A-01R-0826-07	COREAD	tumor	TCGA-AG-3600-01	62	MALE
TCGA-A8-A092-01A-11R-A00Z-07	BRCA	tumor	TCGA-A8-A092-01	48	FEMALE
TCGA-22-4596-01A-01R-1201-07	LUSC	tumor	TCGA-22-4596-01	69	FEMALE
TCGA-XF-A9T6-01A-11R-A42T-07	BLCA	tumor	TCGA-XF-A9T6-01	88	FEMALE
TCGA-25-1323-01A-01R-1565-13	OV	tumor	TCGA-25-1323-01	72	FEMALE
TCGA-CQ-5333-01A-01R-2403-07	HNSC	tumor	TCGA-CQ-5333-01	74	MALE
TCGA-HT-7476-01A-11R-2027-07	LGG	tumor	TCGA-HT-7476-01	26	MALE
TCGA-22-5479-01A-31R-1949-07	LUSC	tumor	TCGA-22-5479-01	64	MALE
TCGA-B0-4844-01A-01R-1277-07	KIRC	tumor	TCGA-B0-4844-01	60	MALE
TCGA-P4-AAVM-01A-11R-A42S-07	KIRP	tumor	TCGA-P4-AAVM-01	69	MALE
TCGA-MH-A855-01A-11R-A355-07	KIRP	tumor	TCGA-MH-A855-01	52	FEMALE
TCGA-CM-4752-01A-01R-1410-07	COREAD	tumor	TCGA-CM-4752-01	58	MALE
TCGA-AB-2821-03A-01T-0735-13	LAML	tumor	TCGA-AB-2821-03	64	MALE
TCGA-WA-A7H4-01A-21R-A34R-07	HNSC	tumor	TCGA-WA-A7H4-01	69	MALE
TCGA-06-2561-01A-02R-1849-01	GBM	tumor	TCGA-06-2561-01	53	FEMALE
TCGA-F7-A50I-01A-11R-A28V-07	HNSC	tumor	TCGA-F7-A50I-01	72	MALE
TCGA-CA-6719-01A-11R-1839-07	COREAD	tumor	TCGA-CA-6719-01	77	MALE
TCGA-D6-6516-01A-11R-1873-07	HNSC	tumor	TCGA-D6-6516-01	69	MALE
TCGA-BR-8589-01A-11R-2402-13	STAD	tumor	TCGA-BR-8589-01	56.75	MALE
TCGA-S3-A6ZF-01A-32R-A32P-07	BRCA	tumor	TCGA-S3-A6ZF-01	64	FEMALE
TCGA-EW-A1OX-01A-11R-A144-07	BRCA	tumor	TCGA-EW-A1OX-01	43	FEMALE
TCGA-EM-A1YD-01A-11R-A14Y-07	THCA	tumor	TCGA-EM-A1YD-01	53	FEMALE
TCGA-EE-A2MH-06A-11R-A18S-07	SKCM	tumor	TCGA-EE-A2MH-06	66	MALE
TCGA-AN-A03Y-01A-21R-A00Z-07	BRCA	tumor	TCGA-AN-A03Y-01	66	FEMALE
TCGA-ER-A3EV-06A-11R-A20F-07	SKCM	tumor	TCGA-ER-A3EV-06	55	MALE
TCGA-56-A5DR-01A-11R-A27Q-07	LUSC	tumor	TCGA-56-A5DR-01	81	MALE
TCGA-WE-A8JZ-06A-11R-A37K-07	SKCM	tumor	TCGA-WE-A8JZ-06	70	MALE
TCGA-OR-A5LM-01A-11R-A29S-07	ACC	tumor	TCGA-OR-A5LM-01	23	MALE
TCGA-ER-A199-06A-11R-A18T-07	SKCM	tumor	TCGA-ER-A199-06	86	FEMALE
TCGA-CZ-5456-01A-01R-1503-07	KIRC	tumor	TCGA-CZ-5456-01	57	MALE
TCGA-BK-A0CB-01A-32R-A104-07	UCEC	tumor	TCGA-BK-A0CB-01	60	FEMALE
TCGA-DJ-A4UL-01A-11R-A250-07	THCA	tumor	TCGA-DJ-A4UL-01	68	FEMALE
TCGA-C8-A1HL-01A-11R-A137-07	BRCA	tumor	TCGA-C8-A1HL-01	38	FEMALE
TCGA-CN-A6V3-01A-12R-A34R-07	HNSC	tumor	TCGA-CN-A6V3-01	61	MALE
TCGA-58-A46M-01A-11R-A24H-07	LUSC	tumor	TCGA-58-A46M-01	61	MALE
TCGA-FR-A3YO-06A-11R-A239-07	SKCM	tumor	TCGA-FR-A3YO-06	1	FEMALE
TCGA-BR-4362-01A-01R-1157-13	STAD	tumor	TCGA-BR-4362-01	74.41	FEMALE
TCGA-HT-A5RC-01A-11R-A28M-07	LGG	tumor	TCGA-HT-A5RC-01	70	FEMALE
TCGA-E2-A10F-01A-11R-A10J-07	BRCA	tumor	TCGA-E2-A10F-01	47	FEMALE
TCGA-AA-3977-01A-01R-1022-07	COREAD	tumor	TCGA-AA-3977-01	65	MALE
TCGA-ER-A19G-06A-11R-A18U-07	SKCM	tumor	TCGA-ER-A19G-06	48	FEMALE
TCGA-VS-A9UH-01A-11R-A42T-07	CESC	tumor	TCGA-VS-A9UH-01	53	FEMALE
TCGA-66-2758-01A-02R-0851-07	LUSC	tumor	TCGA-66-2758-01	71	MALE
TCGA-BB-4224-01A-01R-1436-07	HNSC	tumor	TCGA-BB-4224-01	52	MALE
TCGA-CN-5374-01A-01R-1436-07	HNSC	tumor	TCGA-CN-5374-01	56	FEMALE
TCGA-A3-3365-01A-01R-0864-07	KIRC	tumor	TCGA-A3-3365-01	46	MALE
TCGA-50-5936-01A-11R-1628-07	LUAD	tumor	TCGA-50-5936-01	58	MALE
TCGA-A6-2674-01B-04R-A277-07	COREAD	tumor	TCGA-A6-2674-01	71	MALE
TCGA-AO-A0JD-01A-11R-A056-07	BRCA	tumor	TCGA-AO-A0JD-01	59	FEMALE
TCGA-HT-7482-01A-11R-2027-07	LGG	tumor	TCGA-HT-7482-01	18	FEMALE
TCGA-D7-A74A-01A-11R-A32D-31	STAD	tumor	TCGA-D7-A74A-01	61	FEMALE
TCGA-VQ-A922-01A-11R-A414-31	STAD	tumor	TCGA-VQ-A922-01	70	MALE
TCGA-31-1944-01A-01R-1568-13	OV	tumor	TCGA-31-1944-01	47	FEMALE
TCGA-EW-A6SA-01A-21R-A32P-07	BRCA	tumor	TCGA-EW-A6SA-01	59	MALE
TCGA-W3-AA1Q-06A-11R-A38C-07	SKCM	tumor	TCGA-W3-AA1Q-06	57	MALE
TCGA-5L-AAT1-01A-12R-A41B-07	BRCA	tumor	TCGA-5L-AAT1-01	63	FEMALE
TCGA-MM-A84U-01A-11R-A37O-07	KIRC	tumor	TCGA-MM-A84U-01	58	FEMALE
TCGA-EI-6885-01A-11R-1928-07	COREAD	tumor	TCGA-EI-6885-01	57	FEMALE
TCGA-C5-A2M1-01A-11R-A18M-07	CESC	tumor	TCGA-C5-A2M1-01	37	FEMALE
TCGA-60-2716-01A-01R-0851-07	LUSC	tumor	TCGA-60-2716-01	39	MALE
TCGA-CN-6018-01A-11R-1686-07	HNSC	tumor	TCGA-CN-6018-01	85	FEMALE
TCGA-ER-A2NC-06A-11R-A18T-07	SKCM	tumor	TCGA-ER-A2NC-06	50	MALE
TCGA-B7-5816-01A-21R-1602-13	STAD	tumor	TCGA-B7-5816-01	51.19	FEMALE
TCGA-HC-7819-01A-11R-2118-07	PRAD	tumor	TCGA-HC-7819-01	53	MALE
TCGA-AX-A05T-01A-11R-A00V-07	UCEC	tumor	TCGA-AX-A05T-01	82	FEMALE
TCGA-E9-A1RB-01A-11R-A157-07	BRCA	tumor	TCGA-E9-A1RB-01	40	FEMALE
TCGA-MH-A561-01A-11R-A26U-07	KIRP	tumor	TCGA-MH-A561-01	66	MALE
TCGA-AF-2693-01A-02R-1736-07	COREAD	tumor	TCGA-AF-2693-01	75	MALE
TCGA-78-7156-01A-11R-2039-07	LUAD	tumor	TCGA-78-7156-01	62	MALE
TCGA-F1-6875-01A-11R-2055-13	STAD	tumor	TCGA-F1-6875-01	79.97	MALE
TCGA-XF-AAMQ-01A-11R-A42T-07	BLCA	tumor	TCGA-XF-AAMQ-01	59	FEMALE
TCGA-HW-8322-01A-11R-2404-07	LGG	tumor	TCGA-HW-8322-01	39	MALE
TCGA-BA-6870-01A-11R-1873-07	HNSC	tumor	TCGA-BA-6870-01	60	FEMALE
TCGA-BR-8591-01A-11R-2402-13	STAD	tumor	TCGA-BR-8591-01	79.55	MALE
TCGA-A2-A0YH-01A-11R-A109-07	BRCA	tumor	TCGA-A2-A0YH-01	53	FEMALE
TCGA-ET-A3BS-01A-11R-A206-07	THCA	tumor	TCGA-ET-A3BS-01	42	MALE
TCGA-B6-A0X1-01A-11R-A109-07	BRCA	tumor	TCGA-B6-A0X1-01	48	FEMALE
TCGA-CH-5746-01A-11R-1580-07	PRAD	tumor	TCGA-CH-5746-01	57	MALE
TCGA-29-1691-01A-01R-1566-13	OV	tumor	TCGA-29-1691-01	51	FEMALE
TCGA-DK-AA6P-01A-11R-A39I-07	BLCA	tumor	TCGA-DK-AA6P-01	72	FEMALE
TCGA-D6-A6EP-01A-11R-A31N-07	HNSC	tumor	TCGA-D6-A6EP-01	62	MALE
TCGA-A2-A25B-01A-11R-A169-07	BRCA	tumor	TCGA-A2-A25B-01	39	FEMALE
TCGA-ZF-AA4T-01A-11R-A38B-07	BLCA	tumor	TCGA-ZF-AA4T-01	65	MALE
TCGA-LP-A4AX-01A-12R-A24H-07	CESC	tumor	TCGA-LP-A4AX-01	45	FEMALE
TCGA-77-7338-01A-11R-2045-07	LUSC	tumor	TCGA-77-7338-01	64	MALE
TCGA-B6-A0RU-01A-11R-A084-07	BRCA	tumor	TCGA-B6-A0RU-01	49	FEMALE
TCGA-G9-6377-01A-11R-1965-07	PRAD	tumor	TCGA-G9-6377-01	61	MALE
TCGA-FR-A7U8-06A-21R-A352-07	SKCM	tumor	TCGA-FR-A7U8-06	50	MALE
TCGA-DK-A3IM-01A-11R-A20F-07	BLCA	tumor	TCGA-DK-A3IM-01	77	MALE
TCGA-DA-A1IC-06A-11R-A18S-07	SKCM	tumor	TCGA-DA-A1IC-06	81	MALE
TCGA-4Z-AA7Q-01A-11R-A39I-07	BLCA	tumor	TCGA-4Z-AA7Q-01	79	MALE
TCGA-AA-3841-01A-01R-0905-07	COREAD	tumor	TCGA-AA-3841-01	66	MALE
TCGA-A3-3363-01A-01R-0864-07	KIRC	tumor	TCGA-A3-3363-01	50	MALE
TCGA-EW-A1J5-01A-11R-A13Q-07	BRCA	tumor	TCGA-EW-A1J5-01	59	FEMALE
TCGA-86-7953-01A-11R-2187-07	LUAD	tumor	TCGA-86-7953-01	69	FEMALE
TCGA-CJ-6030-01A-11R-1672-07	KIRC	tumor	TCGA-CJ-6030-01	65	MALE
TCGA-AA-A00F-01A-01R-A002-07	COREAD	tumor	TCGA-AA-A00F-01	66	MALE
TCGA-FD-A43X-01A-11R-A23W-07	BLCA	tumor	TCGA-FD-A43X-01	84	MALE
TCGA-61-1721-01A-01R-1569-13	OV	tumor	TCGA-61-1721-01	38	FEMALE
TCGA-36-1581-01A-01R-1566-13	OV	tumor	TCGA-36-1581-01	63	FEMALE
TCGA-D3-A51F-06A-11R-A266-07	SKCM	tumor	TCGA-D3-A51F-06	51	MALE
TCGA-CR-7401-01A-11R-2016-07	HNSC	tumor	TCGA-CR-7401-01	64	MALE
TCGA-EE-A3J5-06A-11R-A20F-07	SKCM	tumor	TCGA-EE-A3J5-06	71	MALE
TCGA-CR-7404-01A-11R-2132-07	HNSC	tumor	TCGA-CR-7404-01	53	MALE
TCGA-AC-A2FG-01A-11R-A17B-07	BRCA	tumor	TCGA-AC-A2FG-01	79	FEMALE
TCGA-AG-3593-01A-01R-0821-07	COREAD	tumor	TCGA-AG-3593-01	72	FEMALE
TCGA-D3-A1QB-06A-11R-A18T-07	SKCM	tumor	TCGA-D3-A1QB-06	75	FEMALE
TCGA-4A-A93W-01A-11R-A37K-07	KIRP	tumor	TCGA-4A-A93W-01	66	FEMALE
TCGA-06-0747-01A-01R-1849-01	GBM	tumor	TCGA-06-0747-01	53	MALE
TCGA-94-7033-01A-11R-1949-07	LUSC	tumor	TCGA-94-7033-01	73	MALE
TCGA-AO-A124-01A-11R-A10J-07	BRCA	tumor	TCGA-AO-A124-01	38	FEMALE
TCGA-DD-AAD8-01A-11R-A41C-07	LIHC	tumor	TCGA-DD-AAD8-01	73	FEMALE
TCGA-D8-A1JK-01A-11R-A13Q-07	BRCA	tumor	TCGA-D8-A1JK-01	90	FEMALE
TCGA-D1-A17B-01A-22R-A12I-07	UCEC	tumor	TCGA-D1-A17B-01	69	FEMALE
TCGA-T3-A92N-01A-11R-A39I-07	HNSC	tumor	TCGA-T3-A92N-01	79	MALE
TCGA-AN-A0XW-01A-11R-A109-07	BRCA	tumor	TCGA-AN-A0XW-01	36	FEMALE
TCGA-BH-A0AY-01A-21R-A00Z-07	BRCA	tumor	TCGA-BH-A0AY-01	62	FEMALE
TCGA-50-5055-01A-01R-1628-07	LUAD	tumor	TCGA-50-5055-01	79	FEMALE
TCGA-A8-A091-01A-11R-A00Z-07	BRCA	tumor	TCGA-A8-A091-01	61	FEMALE
TCGA-HT-7605-01A-11R-2090-07	LGG	tumor	TCGA-HT-7605-01	38	MALE
TCGA-D8-A1XF-01A-11R-A14D-07	BRCA	tumor	TCGA-D8-A1XF-01	45	FEMALE
TCGA-IA-A83S-01A-11R-A355-07	KIRP	tumor	TCGA-IA-A83S-01	81	MALE
TCGA-BP-5180-01A-01R-1426-07	KIRC	tumor	TCGA-BP-5180-01	53	MALE
TCGA-HP-A5N0-01A-11R-A28V-07	LIHC	tumor	TCGA-HP-A5N0-01	90	FEMALE
TCGA-C8-A278-01A-11R-A169-07	BRCA	tumor	TCGA-C8-A278-01	61	FEMALE
TCGA-EL-A3CU-01A-11R-A19O-07	THCA	tumor	TCGA-EL-A3CU-01	70	FEMALE
TCGA-E7-A541-01A-11R-A26T-07	BLCA	tumor	TCGA-E7-A541-01	66	MALE
TCGA-AR-A5QQ-01A-11R-A28M-07	BRCA	tumor	TCGA-AR-A5QQ-01	68	FEMALE
TCGA-D8-A1XA-01A-11R-A14D-07	BRCA	tumor	TCGA-D8-A1XA-01	64	FEMALE
TCGA-AR-A0U4-01A-11R-A109-07	BRCA	tumor	TCGA-AR-A0U4-01	54	FEMALE
TCGA-HU-A4GT-01A-21R-A251-31	STAD	tumor	TCGA-HU-A4GT-01	71.82	FEMALE
TCGA-DT-5265-01A-21R-1830-07	COREAD	tumor	TCGA-DT-5265-01	51	MALE
TCGA-ED-A627-01A-12R-A311-07	LIHC	tumor	TCGA-ED-A627-01	74	MALE
TCGA-AB-2865-03A-01T-0736-13	LAML	tumor	TCGA-AB-2865-03	75	MALE
TCGA-QK-A8ZB-01A-11R-A39I-07	HNSC	tumor	TCGA-QK-A8ZB-01	68	MALE
TCGA-55-8089-01A-11R-2241-07	LUAD	tumor	TCGA-55-8089-01	56	MALE
TCGA-BG-A0M9-01A-21R-A104-07	UCEC	tumor	TCGA-BG-A0M9-01	73	FEMALE
TCGA-29-1777-01A-01R-1567-13	OV	tumor	TCGA-29-1777-01	47	FEMALE
TCGA-60-2721-01A-01R-0851-07	LUSC	tumor	TCGA-60-2721-01	73	MALE
TCGA-AJ-A8CT-01A-11R-A37O-07	UCEC	tumor	TCGA-AJ-A8CT-01	58	FEMALE
TCGA-AU-3779-01A-01R-1723-07	COREAD	tumor	TCGA-AU-3779-01	80	FEMALE
TCGA-A8-A06U-01A-11R-A00Z-07	BRCA	tumor	TCGA-A8-A06U-01	80	FEMALE
TCGA-77-8156-01A-11R-2247-07	LUSC	tumor	TCGA-77-8156-01	60	MALE
TCGA-AB-2811-03B-01T-0760-13	LAML	tumor	TCGA-AB-2811-03	81	MALE
TCGA-EO-A2CG-01A-12R-A180-07	UCEC	tumor	TCGA-EO-A2CG-01	69	FEMALE
TCGA-KB-A93G-01A-11R-A39E-31	STAD	tumor	TCGA-KB-A93G-01	68	MALE
TCGA-DY-A0XA-01A-11R-A155-07	COREAD	tumor	TCGA-DY-A0XA-01	57	FEMALE
TCGA-BP-4981-01A-01R-1334-07	KIRC	tumor	TCGA-BP-4981-01	75	FEMALE
TCGA-D5-6535-01A-11R-1723-07	COREAD	tumor	TCGA-D5-6535-01	80	FEMALE
TCGA-86-8673-01A-11R-2403-07	LUAD	tumor	TCGA-86-8673-01	61	MALE
TCGA-TM-A7CF-01A-11R-A32Q-07	LGG	tumor	TCGA-TM-A7CF-01	41	FEMALE
TCGA-22-4595-01A-01R-1201-07	LUSC	tumor	TCGA-22-4595-01	57	MALE
TCGA-AB-2936-03A-01T-0740-13	LAML	tumor	TCGA-AB-2936-03	61	FEMALE
TCGA-DM-A280-01A-12R-A16W-07	COREAD	tumor	TCGA-DM-A280-01	70	FEMALE
TCGA-93-A4JN-01A-11R-A24X-07	LUAD	tumor	TCGA-93-A4JN-01	71	MALE
TCGA-AC-A3W5-01A-11R-A22K-07	BRCA	tumor	TCGA-AC-A3W5-01	65	FEMALE
TCGA-50-5942-01A-21R-1755-07	LUAD	tumor	TCGA-50-5942-01	67	FEMALE
TCGA-BG-A0MT-01A-11R-A104-07	UCEC	tumor	TCGA-BG-A0MT-01	64	FEMALE
TCGA-SX-A71W-01A-12R-A355-07	KIRP	tumor	TCGA-SX-A71W-01	66	MALE
TCGA-31-1951-01A-01R-1568-13	OV	tumor	TCGA-31-1951-01	58	FEMALE
TCGA-EW-A1J2-01A-21R-A13Q-07	BRCA	tumor	TCGA-EW-A1J2-01	50	FEMALE
TCGA-GF-A4EO-06A-12R-A24X-07	SKCM	tumor	TCGA-GF-A4EO-06	74	FEMALE
TCGA-13-0720-01A-01R-1564-13	OV	tumor	TCGA-13-0720-01	48	FEMALE
TCGA-AK-3454-01A-02R-1277-07	KIRC	tumor	TCGA-AK-3454-01	84	MALE
TCGA-13-0804-01A-01R-1564-13	OV	tumor	TCGA-13-0804-01	73	FEMALE
TCGA-39-5019-01A-01R-1820-07	LUSC	tumor	TCGA-39-5019-01	70	MALE
TCGA-DD-AAEK-01A-11R-A41C-07	LIHC	tumor	TCGA-DD-AAEK-01	51	MALE
TCGA-49-4505-01A-01R-1206-07	LUAD	tumor	TCGA-49-4505-01	61	FEMALE
TCGA-V1-A9ZR-01A-11R-A41O-07	PRAD	tumor	TCGA-V1-A9ZR-01	68	MALE
TCGA-H7-A6C4-01A-11R-A30B-07	HNSC	tumor	TCGA-H7-A6C4-01	35	FEMALE
TCGA-A3-3385-01A-02R-1420-07	KIRC	tumor	TCGA-A3-3385-01	46	FEMALE
TCGA-85-8288-01A-11R-2296-07	LUSC	tumor	TCGA-85-8288-01	70	MALE
TCGA-QK-A6IJ-01A-11R-A31N-07	HNSC	tumor	TCGA-QK-A6IJ-01	71	MALE
TCGA-95-7948-01A-11R-2187-07	LUAD	tumor	TCGA-95-7948-01	42	FEMALE
TCGA-EM-A3SZ-01A-11R-A22U-07	THCA	tumor	TCGA-EM-A3SZ-01	42	FEMALE
TCGA-L6-A4EP-01A-11R-A250-07	THCA	tumor	TCGA-L6-A4EP-01	41	FEMALE
TCGA-61-2098-01A-01R-1568-13	OV	tumor	TCGA-61-2098-01	62	FEMALE
TCGA-AA-3560-01A-01R-0821-07	COREAD	tumor	TCGA-AA-3560-01	72	FEMALE
TCGA-DD-AACB-01A-11R-A41C-07	LIHC	tumor	TCGA-DD-AACB-01	74	FEMALE
TCGA-44-8117-01A-11R-2241-07	LUAD	tumor	TCGA-44-8117-01	54	FEMALE
TCGA-BR-A4J4-01A-12R-A251-31	STAD	tumor	TCGA-BR-A4J4-01	39.58	MALE
TCGA-EY-A1GQ-01A-21R-A13S-07	UCEC	tumor	TCGA-EY-A1GQ-01	76	FEMALE
TCGA-29-1785-01A-01R-1567-13	OV	tumor	TCGA-29-1785-01	55	FEMALE
TCGA-13-0887-01A-01R-1564-13	OV	tumor	TCGA-13-0887-01	42	FEMALE
TCGA-KK-A8IL-01A-11R-A36G-07	PRAD	tumor	TCGA-KK-A8IL-01	65	MALE
TCGA-XF-A9SZ-01A-11R-A39I-07	BLCA	tumor	TCGA-XF-A9SZ-01	79	MALE
TCGA-B0-4841-01A-01R-1277-07	KIRC	tumor	TCGA-B0-4841-01	63	MALE
TCGA-GR-7351-01A-11R-2213-07	DLBC	tumor	TCGA-GR-7351-01	56	FEMALE
TCGA-BH-A0E7-01A-11R-A034-07	BRCA	tumor	TCGA-BH-A0E7-01	79	FEMALE
TCGA-EP-A2KC-01A-11R-A213-07	LIHC	tumor	TCGA-EP-A2KC-01	62	MALE
TCGA-85-7844-01A-11R-2125-07	LUSC	tumor	TCGA-85-7844-01	71	MALE
TCGA-DK-AA71-01A-31R-A39I-07	BLCA	tumor	TCGA-DK-AA71-01	71	MALE
TCGA-AB-2878-03A-01T-0734-13	LAML	tumor	TCGA-AB-2878-03	47	FEMALE
TCGA-24-1553-01A-01R-1566-13	OV	tumor	TCGA-24-1553-01	53	FEMALE
TCGA-CM-5863-01A-21R-1839-07	COREAD	tumor	TCGA-CM-5863-01	60	FEMALE
TCGA-BJ-A4O9-01A-11R-A250-07	THCA	tumor	TCGA-BJ-A4O9-01	51	FEMALE
TCGA-86-8281-01A-11R-2287-07	LUAD	tumor	TCGA-86-8281-01	75	MALE
TCGA-59-2355-01A-01R-1569-13	OV	tumor	TCGA-59-2355-01	58	FEMALE
TCGA-BA-6868-01B-12R-1915-07	HNSC	tumor	TCGA-BA-6868-01	53	MALE
TCGA-EE-A3JA-06A-11R-A20F-07	SKCM	tumor	TCGA-EE-A3JA-06	44	MALE
TCGA-MW-A4EC-01A-11R-A266-07	KIRC	tumor	TCGA-MW-A4EC-01	72	FEMALE
TCGA-A6-6781-01B-06R-A277-07	COREAD	tumor	TCGA-A6-6781-01	43	MALE
TCGA-CG-4475-01A-01R-1157-13	STAD	tumor	TCGA-CG-4475-01	76.84	MALE
TCGA-06-5414-01A-01R-1849-01	GBM	tumor	TCGA-06-5414-01	61	MALE
TCGA-GM-A3XN-01A-12R-A22U-07	BRCA	tumor	TCGA-GM-A3XN-01	44	FEMALE
TCGA-EM-A3FL-01A-11R-A21D-07	THCA	tumor	TCGA-EM-A3FL-01	63	FEMALE
TCGA-A2-A0ST-01A-12R-A084-07	BRCA	tumor	TCGA-A2-A0ST-01	62	FEMALE
TCGA-AB-2985-03A-01T-0734-13	LAML	tumor	TCGA-AB-2985-03	81	FEMALE
TCGA-D5-5538-01A-01R-1653-07	COREAD	tumor	TCGA-D5-5538-01	60	FEMALE
TCGA-DD-AAC8-01A-11R-A41C-07	LIHC	tumor	TCGA-DD-AAC8-01	72	MALE
TCGA-EM-A4G1-01A-11R-A250-07	THCA	tumor	TCGA-EM-A4G1-01	26	FEMALE
TCGA-C5-A1MI-01A-11R-A14Y-07	CESC	tumor	TCGA-C5-A1MI-01	50	FEMALE
TCGA-AC-A23C-01A-12R-A169-07	BRCA	tumor	TCGA-AC-A23C-01	62	FEMALE
TCGA-3L-AA1B-01A-11R-A37K-07	COREAD	tumor	TCGA-3L-AA1B-01	1	1
TCGA-25-1634-01A-01R-1566-13	OV	tumor	TCGA-25-1634-01	75	FEMALE
TCGA-B0-4847-01A-01R-1277-07	KIRC	tumor	TCGA-B0-4847-01	60	MALE
TCGA-44-7662-01A-11R-2066-07	LUAD	tumor	TCGA-44-7662-01	61	MALE
TCGA-SX-A7SM-01A-11R-A355-07	KIRP	tumor	TCGA-SX-A7SM-01	60	MALE
TCGA-DI-A2QY-01A-12R-A19W-07	UCEC	tumor	TCGA-DI-A2QY-01	64	FEMALE
TCGA-CJ-4870-01A-01R-1305-07	KIRC	tumor	TCGA-CJ-4870-01	58	FEMALE
TCGA-AF-6136-01A-11R-1830-07	COREAD	tumor	TCGA-AF-6136-01	72	FEMALE
TCGA-BD-A3ER-01A-11R-A213-07	LIHC	tumor	TCGA-BD-A3ER-01	62	MALE
TCGA-A2-A04N-01A-11R-A115-07	BRCA	tumor	TCGA-A2-A04N-01	66	FEMALE
TCGA-CV-7263-01A-11R-2016-07	HNSC	tumor	TCGA-CV-7263-01	64	MALE
TCGA-XF-AAMT-01A-11R-A42T-07	BLCA	tumor	TCGA-XF-AAMT-01	75	FEMALE
TCGA-MT-A67D-01A-31R-A30B-07	HNSC	tumor	TCGA-MT-A67D-01	55	MALE
TCGA-50-5045-01A-01R-1628-07	LUAD	tumor	TCGA-50-5045-01	57	FEMALE
TCGA-B2-5641-01A-01R-1541-07	KIRC	tumor	TCGA-B2-5641-01	79	MALE
TCGA-BG-A0M8-01A-12R-A104-07	UCEC	tumor	TCGA-BG-A0M8-01	50	FEMALE
TCGA-VW-A8FI-01A-11R-A36H-07	LGG	tumor	TCGA-VW-A8FI-01	66	MALE
TCGA-B0-5109-01A-02R-1420-07	KIRC	tumor	TCGA-B0-5109-01	69	MALE
TCGA-JW-A69B-01A-11R-A32P-07	CESC	tumor	TCGA-JW-A69B-01	44	FEMALE
TCGA-ZF-AA5N-01A-11R-A42T-07	BLCA	tumor	TCGA-ZF-AA5N-01	62	FEMALE
TCGA-A5-A0G5-01A-11R-A040-07	UCEC	tumor	TCGA-A5-A0G5-01	73	FEMALE
TCGA-09-0366-01A-01R-1564-13	OV	tumor	TCGA-09-0366-01	55	FEMALE
TCGA-FT-A61P-01A-11R-A30C-07	BLCA	tumor	TCGA-FT-A61P-01	76	MALE
TCGA-CV-6961-01A-21R-1915-07	HNSC	tumor	TCGA-CV-6961-01	61	MALE
TCGA-A2-A0YF-01A-21R-A109-07	BRCA	tumor	TCGA-A2-A0YF-01	67	FEMALE
TCGA-44-6779-01A-11R-1858-07	LUAD	tumor	TCGA-44-6779-01	50	FEMALE
TCGA-AG-3583-01A-01R-0821-07	COREAD	tumor	TCGA-AG-3583-01	66	MALE
TCGA-A5-A2K5-01A-11R-A180-07	UCEC	tumor	TCGA-A5-A2K5-01	76	FEMALE
TCGA-HT-7602-01A-21R-2090-07	LGG	tumor	TCGA-HT-7602-01	21	MALE
TCGA-2Y-A9H0-01A-11R-A38B-07	LIHC	tumor	TCGA-2Y-A9H0-01	49	MALE
TCGA-DM-A28K-01A-21R-A32Y-07	COREAD	tumor	TCGA-DM-A28K-01	75	MALE
TCGA-E9-A5UO-01A-11R-A28M-07	BRCA	tumor	TCGA-E9-A5UO-01	41	FEMALE
TCGA-BR-6456-01A-11R-1802-13	STAD	tumor	TCGA-BR-6456-01	74.71	FEMALE
TCGA-EB-A5SH-06A-11R-A311-07	SKCM	tumor	TCGA-EB-A5SH-06	60	FEMALE
TCGA-DA-A1I4-06A-11R-A18U-07	SKCM	tumor	TCGA-DA-A1I4-06	51	MALE
TCGA-21-5787-01A-01R-1635-07	LUSC	tumor	TCGA-21-5787-01	65	MALE
TCGA-BF-A5EP-01A-12R-A27Q-07	SKCM	tumor	TCGA-BF-A5EP-01	75	FEMALE
TCGA-V1-A8MK-01A-11R-A36G-07	PRAD	tumor	TCGA-V1-A8MK-01	41	MALE
TCGA-56-8304-01A-11R-2326-07	LUSC	tumor	TCGA-56-8304-01	73	FEMALE
TCGA-S9-A7R7-01A-11R-A34R-07	LGG	tumor	TCGA-S9-A7R7-01	27	MALE
TCGA-DJ-A3UQ-01A-11R-A22L-07	THCA	tumor	TCGA-DJ-A3UQ-01	45	FEMALE
TCGA-77-A5FZ-01A-31R-A27Q-07	LUSC	tumor	TCGA-77-A5FZ-01	64	MALE
TCGA-CV-5439-01A-01R-1686-07	HNSC	tumor	TCGA-CV-5439-01	62	MALE
TCGA-JW-A5VJ-01A-11R-A28H-07	CESC	tumor	TCGA-JW-A5VJ-01	56	FEMALE
TCGA-DD-AADR-01A-11R-A41C-07	LIHC	tumor	TCGA-DD-AADR-01	58	MALE
TCGA-KL-8330-01A-11R-2315-07	KICH	tumor	TCGA-KL-8330-01	44	FEMALE
TCGA-D9-A4Z6-06A-12R-A266-07	SKCM	tumor	TCGA-D9-A4Z6-06	54	MALE
TCGA-C5-A1BE-01B-11R-A13Y-07	CESC	tumor	TCGA-C5-A1BE-01	64	FEMALE
TCGA-43-7656-01A-11R-2125-07	LUSC	tumor	TCGA-43-7656-01	71	MALE
TCGA-AA-3695-01A-01R-0905-07	COREAD	tumor	TCGA-AA-3695-01	63	FEMALE
TCGA-EJ-5508-01A-02R-1580-07	PRAD	tumor	TCGA-EJ-5508-01	65	MALE
TCGA-XF-A9SP-01A-11R-A39I-07	BLCA	tumor	TCGA-XF-A9SP-01	59	MALE
TCGA-LL-A6FP-01A-11R-A31O-07	BRCA	tumor	TCGA-LL-A6FP-01	90	FEMALE
TCGA-DU-7013-01A-11R-2027-07	LGG	tumor	TCGA-DU-7013-01	59	MALE
TCGA-78-8640-01A-11R-2403-07	LUAD	tumor	TCGA-78-8640-01	59	MALE
TCGA-CR-7379-01A-11R-2016-07	HNSC	tumor	TCGA-CR-7379-01	78	FEMALE
TCGA-MP-A4T9-01A-11R-A24X-07	LUAD	tumor	TCGA-MP-A4T9-01	54	FEMALE
TCGA-UF-A719-01A-12R-A34R-07	HNSC	tumor	TCGA-UF-A719-01	54	MALE
TCGA-D8-A1JG-01B-11R-A13Q-07	BRCA	tumor	TCGA-D8-A1JG-01	62	FEMALE
TCGA-HT-A5R5-01A-11R-A28M-07	LGG	tumor	TCGA-HT-A5R5-01	33	FEMALE
TCGA-EW-A1P4-01A-21R-A144-07	BRCA	tumor	TCGA-EW-A1P4-01	43	FEMALE
TCGA-NH-A8F7-01A-11R-A41B-07	COREAD	tumor	TCGA-NH-A8F7-01	53	FEMALE
TCGA-CI-6621-01A-11R-1830-07	COREAD	tumor	TCGA-CI-6621-01	63	MALE
TCGA-13-0884-01B-01R-1565-13	OV	tumor	TCGA-13-0884-01	39	FEMALE
TCGA-ZG-A8QW-01A-11R-A37L-07	PRAD	tumor	TCGA-ZG-A8QW-01	72	MALE
TCGA-4Z-AA7O-01A-31R-A39I-07	BLCA	tumor	TCGA-4Z-AA7O-01	64	MALE
TCGA-A4-7287-01A-11R-2139-07	KIRP	tumor	TCGA-A4-7287-01	75	FEMALE
TCGA-CH-5769-01A-11R-1580-07	PRAD	tumor	TCGA-CH-5769-01	48	MALE
TCGA-QH-A6CS-01A-11R-A31N-07	LGG	tumor	TCGA-QH-A6CS-01	41	MALE
TCGA-A8-A08C-01A-11R-A00Z-07	BRCA	tumor	TCGA-A8-A08C-01	65	FEMALE
TCGA-H2-A422-01A-11R-A23N-07	THCA	tumor	TCGA-H2-A422-01	40	FEMALE
TCGA-CG-4437-01A-01R-1802-13	STAD	tumor	TCGA-CG-4437-01	83.42	MALE
TCGA-AJ-A23N-01A-11R-A22K-07	UCEC	tumor	TCGA-AJ-A23N-01	70	FEMALE
TCGA-G4-6323-01A-11R-1723-07	COREAD	tumor	TCGA-G4-6323-01	50	MALE
TCGA-E8-A416-01A-11R-A23N-07	THCA	tumor	TCGA-E8-A416-01	51	FEMALE
TCGA-BL-A13I-01B-04R-A277-07	BLCA	tumor	TCGA-BL-A13I-01	57	FEMALE
TCGA-BJ-A0YZ-01A-11R-A10U-07	THCA	tumor	TCGA-BJ-A0YZ-01	65	MALE
TCGA-2A-AAYO-01A-11R-A41O-07	PRAD	tumor	TCGA-2A-AAYO-01	57	MALE
TCGA-G2-A3VY-01A-11R-A22U-07	BLCA	tumor	TCGA-G2-A3VY-01	66	MALE
TCGA-A2-A1G4-01A-11R-A13Q-07	BRCA	tumor	TCGA-A2-A1G4-01	71	FEMALE
TCGA-EM-A2CT-01A-11R-A180-07	THCA	tumor	TCGA-EM-A2CT-01	20	FEMALE
TCGA-G9-6367-01A-11R-1789-07	PRAD	tumor	TCGA-G9-6367-01	60	MALE
TCGA-62-8399-01A-21R-2326-07	LUAD	tumor	TCGA-62-8399-01	62	MALE
TCGA-FA-A6HN-01A-11R-A31O-07	DLBC	tumor	TCGA-FA-A6HN-01	73	MALE
TCGA-HT-7477-01B-11R-A28M-07	LGG	tumor	TCGA-HT-7477-01	62	MALE
TCGA-B0-4810-01A-01R-1503-07	KIRC	tumor	TCGA-B0-4810-01	47	MALE
TCGA-BJ-A28S-01A-11R-A19O-07	THCA	tumor	TCGA-BJ-A28S-01	79	MALE
TCGA-DK-A3WX-01A-22R-A22U-07	BLCA	tumor	TCGA-DK-A3WX-01	67	FEMALE
TCGA-B3-4103-01A-02R-1351-07	KIRP	tumor	TCGA-B3-4103-01	56	MALE
TCGA-XF-A8HG-01A-11R-A36F-07	BLCA	tumor	TCGA-XF-A8HG-01	69	MALE
TCGA-AY-6197-01A-11R-1723-07	COREAD	tumor	TCGA-AY-6197-01	60	MALE
TCGA-AP-A0L8-01A-11R-A040-07	UCEC	tumor	TCGA-AP-A0L8-01	70	FEMALE
TCGA-13-1511-01A-01R-1565-13	OV	tumor	TCGA-13-1511-01	52	FEMALE
TCGA-41-2571-01A-01R-1850-01	GBM	tumor	TCGA-41-2571-01	89	MALE
TCGA-KU-A66S-01A-21R-A30B-07	HNSC	tumor	TCGA-KU-A66S-01	69	FEMALE
TCGA-HT-A5RB-01A-11R-A28M-07	LGG	tumor	TCGA-HT-A5RB-01	24	MALE
TCGA-C8-A26Y-01A-11R-A16F-07	BRCA	tumor	TCGA-C8-A26Y-01	90	FEMALE
TCGA-BR-4255-01A-01R-1131-13	STAD	tumor	TCGA-BR-4255-01	76.37	FEMALE
TCGA-DK-AA6S-01A-21R-A39I-07	BLCA	tumor	TCGA-DK-AA6S-01	60	MALE
TCGA-A6-6650-01A-11R-A278-07	COREAD	tumor	TCGA-A6-6650-01	69	FEMALE
TCGA-BP-4760-01A-02R-1420-07	KIRC	tumor	TCGA-BP-4760-01	69	MALE
TCGA-N7-A4Y8-01A-11R-A28V-07	UCS	tumor	TCGA-N7-A4Y8-01	72	FEMALE
TCGA-NH-A8F8-01A-72R-A41B-07	COREAD	tumor	TCGA-NH-A8F8-01	79	MALE
TCGA-HC-8257-01A-11R-2263-07	PRAD	tumor	TCGA-HC-8257-01	70	MALE
TCGA-DW-7834-01A-11R-2139-07	KIRP	tumor	TCGA-DW-7834-01	53	MALE
TCGA-PG-A916-01A-11R-A37O-07	UCEC	tumor	TCGA-PG-A916-01	70	FEMALE
TCGA-BA-5557-01A-01R-1514-07	HNSC	tumor	TCGA-BA-5557-01	41	FEMALE
TCGA-AA-A02R-01A-01R-A00A-07	COREAD	tumor	TCGA-AA-A02R-01	84	FEMALE
TCGA-EE-A2MQ-06A-11R-A18S-07	SKCM	tumor	TCGA-EE-A2MQ-06	70	FEMALE
TCGA-NJ-A55R-01A-11R-A262-07	LUAD	tumor	TCGA-NJ-A55R-01	67	MALE
TCGA-D1-A16S-01A-11R-A12I-07	UCEC	tumor	TCGA-D1-A16S-01	70	FEMALE
TCGA-CH-5744-01A-11R-1580-07	PRAD	tumor	TCGA-CH-5744-01	64	MALE
TCGA-BK-A26L-01C-04R-A277-07	UCEC	tumor	TCGA-BK-A26L-01	71	FEMALE
TCGA-04-1365-01A-01R-1565-13	OV	tumor	TCGA-04-1365-01	87	FEMALE
TCGA-AQ-A04H-01B-11R-A10J-07	BRCA	tumor	TCGA-AQ-A04H-01	61	FEMALE
TCGA-BS-A0UL-01A-11R-A109-07	UCEC	tumor	TCGA-BS-A0UL-01	54	FEMALE
TCGA-05-4426-01A-01R-1206-07	LUAD	tumor	TCGA-05-4426-01	71	MALE
TCGA-BH-A0GY-01A-11R-A056-07	BRCA	tumor	TCGA-BH-A0GY-01	67	FEMALE
TCGA-BP-4173-01A-02R-1289-07	KIRC	tumor	TCGA-BP-4173-01	47	MALE
TCGA-91-6840-01A-11R-1949-07	LUAD	tumor	TCGA-91-6840-01	59	FEMALE
TCGA-AJ-A3EL-01A-11R-A213-07	UCEC	tumor	TCGA-AJ-A3EL-01	47	FEMALE
TCGA-A8-A09M-01A-11R-A00Z-07	BRCA	tumor	TCGA-A8-A09M-01	75	FEMALE
TCGA-85-8666-01A-11R-2403-07	LUSC	tumor	TCGA-85-8666-01	65	MALE
TCGA-CH-5768-01A-11R-1580-07	PRAD	tumor	TCGA-CH-5768-01	72	MALE
TCGA-FG-8189-01B-11R-A28M-07	LGG	tumor	TCGA-FG-8189-01	33	FEMALE
TCGA-AA-A00A-01A-01R-A002-07	COREAD	tumor	TCGA-AA-A00A-01	80	MALE
TCGA-AC-A3OD-01A-11R-A21T-07	BRCA	tumor	TCGA-AC-A3OD-01	68	FEMALE
TCGA-UZ-A9PX-01A-11R-A42S-07	KIRP	tumor	TCGA-UZ-A9PX-01	72	MALE
TCGA-BK-A6W4-01A-12R-A34R-07	UCEC	tumor	TCGA-BK-A6W4-01	62	FEMALE
TCGA-AP-A1DQ-01A-11R-A137-07	UCEC	tumor	TCGA-AP-A1DQ-01	76	FEMALE
TCGA-B5-A0JX-01A-21R-A14M-07	UCEC	tumor	TCGA-B5-A0JX-01	62	FEMALE
TCGA-IZ-A6M8-01A-11R-A31O-07	KIRP	tumor	TCGA-IZ-A6M8-01	69	MALE
TCGA-BB-8601-01A-11R-2403-07	HNSC	tumor	TCGA-BB-8601-01	84	MALE
TCGA-10-0938-01A-02R-1564-13	OV	tumor	TCGA-10-0938-01	80	FEMALE
TCGA-HC-A9TH-01A-11R-A41O-07	PRAD	tumor	TCGA-HC-A9TH-01	58	MALE
TCGA-AN-A0G0-01A-11R-A034-07	BRCA	tumor	TCGA-AN-A0G0-01	56	FEMALE
TCGA-E8-A418-01A-11R-A23N-07	THCA	tumor	TCGA-E8-A418-01	75	FEMALE
TCGA-DD-A11C-01A-11R-A131-07	LIHC	tumor	TCGA-DD-A11C-01	69	MALE
TCGA-29-2427-01A-01R-1569-13	OV	tumor	TCGA-29-2427-01	60	FEMALE
TCGA-EK-A2R7-01A-11R-A18M-07	CESC	tumor	TCGA-EK-A2R7-01	45	FEMALE
TCGA-34-5240-01A-01R-1443-07	LUSC	tumor	TCGA-34-5240-01	73	FEMALE
TCGA-D3-A5GU-06A-11R-A27Q-07	SKCM	tumor	TCGA-D3-A5GU-06	36	MALE
TCGA-D1-A16Y-01A-31R-A12I-07	UCEC	tumor	TCGA-D1-A16Y-01	56	FEMALE
TCGA-CV-6942-01A-21R-2016-07	HNSC	tumor	TCGA-CV-6942-01	73	FEMALE
TCGA-HC-A6AS-01A-11R-A30B-07	PRAD	tumor	TCGA-HC-A6AS-01	70	MALE
TCGA-DB-A75L-01A-11R-A32Q-07	LGG	tumor	TCGA-DB-A75L-01	36	FEMALE
TCGA-AC-A3QQ-01B-06R-A22O-07	BRCA	tumor	TCGA-AC-A3QQ-01	54	FEMALE
TCGA-E2-A108-01A-13R-A10J-07	BRCA	tumor	TCGA-E2-A108-01	64	FEMALE
TCGA-RY-A845-01A-11R-A36H-07	LGG	tumor	TCGA-RY-A845-01	40	FEMALE
TCGA-DK-A6AV-01A-12R-A30C-07	BLCA	tumor	TCGA-DK-A6AV-01	82	FEMALE
TCGA-BH-A209-01A-11R-A157-07	BRCA	tumor	TCGA-BH-A209-01	77	FEMALE
TCGA-MK-A84Z-01A-11R-A39I-07	THCA	tumor	TCGA-MK-A84Z-01	74	MALE
TCGA-2F-A9KW-01A-11R-A38B-07	BLCA	tumor	TCGA-2F-A9KW-01	67	FEMALE
TCGA-AJ-A3NC-01A-11R-A22K-07	UCEC	tumor	TCGA-AJ-A3NC-01	63	FEMALE
TCGA-D1-A16E-01A-22R-A12I-07	UCEC	tumor	TCGA-D1-A16E-01	73	FEMALE
TCGA-CR-5248-01A-01R-2016-07	HNSC	tumor	TCGA-CR-5248-01	53	MALE
TCGA-X4-A8KQ-01A-12R-A36G-07	PRAD	tumor	TCGA-X4-A8KQ-01	65	MALE
TCGA-ER-A3PL-06A-11R-A239-07	SKCM	tumor	TCGA-ER-A3PL-06	30	MALE
TCGA-BR-4294-01A-01R-1131-13	STAD	tumor	TCGA-BR-4294-01	65.05	MALE
TCGA-TM-A7C5-01A-11R-A32Q-07	LGG	tumor	TCGA-TM-A7C5-01	30	MALE
TCGA-59-A5PD-01A-11R-A406-31	OV	tumor	TCGA-59-A5PD-01	55	FEMALE
TCGA-CR-7388-01A-11R-2016-07	HNSC	tumor	TCGA-CR-7388-01	70	FEMALE
TCGA-41-5651-01A-01R-1850-01	GBM	tumor	TCGA-41-5651-01	59	FEMALE
TCGA-5M-AATA-01A-31R-A41B-07	COREAD	tumor	TCGA-5M-AATA-01	1	1
TCGA-95-A4VK-01A-11R-A262-07	LUAD	tumor	TCGA-95-A4VK-01	74	FEMALE
TCGA-25-1870-01A-01R-1567-13	OV	tumor	TCGA-25-1870-01	59	FEMALE
TCGA-49-4507-01A-01R-1206-07	LUAD	tumor	TCGA-49-4507-01	73	FEMALE
TCGA-22-5489-01A-01R-1635-07	LUSC	tumor	TCGA-22-5489-01	64	MALE
TCGA-05-4384-01A-01R-1755-07	LUAD	tumor	TCGA-05-4384-01	66	MALE
TCGA-FU-A3YQ-01A-11R-A22U-07	CESC	tumor	TCGA-FU-A3YQ-01	35	FEMALE
TCGA-AZ-4308-01A-01R-1410-07	COREAD	tumor	TCGA-AZ-4308-01	47	FEMALE
TCGA-DJ-A3UT-01A-11R-A22L-07	THCA	tumor	TCGA-DJ-A3UT-01	43	FEMALE
TCGA-SJ-A6ZJ-01A-12R-A34R-07	UCEC	tumor	TCGA-SJ-A6ZJ-01	61	FEMALE
TCGA-CM-6678-01A-11R-1839-07	COREAD	tumor	TCGA-CM-6678-01	63	FEMALE
TCGA-AQ-A54O-01A-11R-A266-07	BRCA	tumor	TCGA-AQ-A54O-01	51	MALE
TCGA-85-7698-01A-11R-2125-07	LUSC	tumor	TCGA-85-7698-01	48	MALE
TCGA-BP-4971-01A-01R-1334-07	KIRC	tumor	TCGA-BP-4971-01	40	MALE
TCGA-EE-A2MJ-06A-11R-A18S-07	SKCM	tumor	TCGA-EE-A2MJ-06	60	MALE
TCGA-BH-A5J0-01A-11R-A27Q-07	BRCA	tumor	TCGA-BH-A5J0-01	63	FEMALE
TCGA-CS-6668-01A-11R-1896-07	LGG	tumor	TCGA-CS-6668-01	57	FEMALE
TCGA-CJ-4918-01A-01R-1426-07	KIRC	tumor	TCGA-CJ-4918-01	64	MALE
TCGA-25-2399-01A-01R-1569-13	OV	tumor	TCGA-25-2399-01	80	FEMALE
TCGA-06-5859-01A-01R-1849-01	GBM	tumor	TCGA-06-5859-01	63	MALE
TCGA-MP-A4SY-01A-21R-A24X-07	LUAD	tumor	TCGA-MP-A4SY-01	61	MALE
TCGA-A2-A1FV-01A-11R-A13Q-07	BRCA	tumor	TCGA-A2-A1FV-01	74	FEMALE
TCGA-CJ-4899-01A-01R-1334-07	KIRC	tumor	TCGA-CJ-4899-01	42	MALE
TCGA-CD-8532-01A-11R-2343-13	STAD	tumor	TCGA-CD-8532-01	52.8	MALE
TCGA-EW-A2FR-01A-11R-A21T-07	BRCA	tumor	TCGA-EW-A2FR-01	59	FEMALE
TCGA-55-1592-01A-01R-0946-07	LUAD	tumor	TCGA-55-1592-01	65	MALE
TCGA-EM-A2OW-01A-11R-A206-07	THCA	tumor	TCGA-EM-A2OW-01	37	FEMALE
TCGA-04-1356-01A-01R-1569-13	OV	tumor	TCGA-04-1356-01	62	FEMALE
TCGA-A7-A13D-01A-13R-A277-07	BRCA	tumor	TCGA-A7-A13D-01	46	FEMALE
TCGA-A5-A0VP-01A-21R-A104-07	UCEC	tumor	TCGA-A5-A0VP-01	74	FEMALE
TCGA-NH-A8F7-06A-31R-A41B-07	COREAD	tumor	TCGA-NH-A8F7-06	53	FEMALE
TCGA-LP-A5U3-01A-11R-A28H-07	CESC	tumor	TCGA-LP-A5U3-01	40	FEMALE
TCGA-BR-8080-01A-11R-2343-13	STAD	tumor	TCGA-BR-8080-01	72.68	FEMALE
TCGA-56-6545-01A-11R-1820-07	LUSC	tumor	TCGA-56-6545-01	77	FEMALE
TCGA-ED-A5KG-01A-11R-A27V-07	LIHC	tumor	TCGA-ED-A5KG-01	60	FEMALE
TCGA-BH-A0HK-01A-11R-A056-07	BRCA	tumor	TCGA-BH-A0HK-01	81	FEMALE
TCGA-ER-A195-06A-11R-A18U-07	SKCM	tumor	TCGA-ER-A195-06	46	MALE
TCGA-39-5011-01A-01R-1443-07	LUSC	tumor	TCGA-39-5011-01	70	FEMALE
TCGA-C5-A1MF-01A-11R-A13Y-07	CESC	tumor	TCGA-C5-A1MF-01	49	FEMALE
TCGA-AN-A0XT-01A-11R-A109-07	BRCA	tumor	TCGA-AN-A0XT-01	54	FEMALE
TCGA-CF-A8HX-01A-11R-A36F-07	BLCA	tumor	TCGA-CF-A8HX-01	55	FEMALE
TCGA-L6-A4EU-01A-11R-A250-07	THCA	tumor	TCGA-L6-A4EU-01	58	FEMALE
TCGA-XK-AAJT-01A-11R-A41O-07	PRAD	tumor	TCGA-XK-AAJT-01	75	MALE
TCGA-66-2759-01A-01R-0851-07	LUSC	tumor	TCGA-66-2759-01	66	MALE
TCGA-24-1471-01A-01R-1566-13	OV	tumor	TCGA-24-1471-01	60	FEMALE
TCGA-AA-3866-01A-01R-1022-07	COREAD	tumor	TCGA-AA-3866-01	78	FEMALE
TCGA-DK-A3IK-01A-32R-A21D-07	BLCA	tumor	TCGA-DK-A3IK-01	88	MALE
TCGA-56-7580-01A-11R-2045-07	LUSC	tumor	TCGA-56-7580-01	84	MALE
TCGA-D1-A17A-01A-11R-A12I-07	UCEC	tumor	TCGA-D1-A17A-01	59	FEMALE
TCGA-J9-A52E-01A-11R-A26U-07	PRAD	tumor	TCGA-J9-A52E-01	65	MALE
TCGA-ZP-A9D4-01A-11R-A37K-07	LIHC	tumor	TCGA-ZP-A9D4-01	64	FEMALE
TCGA-BR-8286-01A-12R-2343-13	STAD	tumor	TCGA-BR-8286-01	49.19	MALE
TCGA-20-0991-01A-01R-1564-13	OV	tumor	TCGA-20-0991-01	78	FEMALE
TCGA-OR-A5JK-01A-11R-A29S-07	ACC	tumor	TCGA-OR-A5JK-01	49	MALE
TCGA-J9-A8CN-01A-11R-A352-07	PRAD	tumor	TCGA-J9-A8CN-01	53	MALE
TCGA-DD-AAVP-01A-11R-A41C-07	LIHC	tumor	TCGA-DD-AAVP-01	48	MALE
TCGA-CN-5359-01A-01R-1436-07	HNSC	tumor	TCGA-CN-5359-01	59	MALE
TCGA-TM-A7C3-01A-11R-A32Q-07	LGG	tumor	TCGA-TM-A7C3-01	43	FEMALE
TCGA-EW-A1IZ-01A-11R-A13Q-07	BRCA	tumor	TCGA-EW-A1IZ-01	53	FEMALE
TCGA-44-2668-01A-01R-A278-07	LUAD	tumor	TCGA-44-2668-01	51	MALE
TCGA-VQ-A8PQ-01A-11R-A414-31	STAD	tumor	TCGA-VQ-A8PQ-01	50	FEMALE
TCGA-D7-A747-01A-22R-A33Y-31	STAD	tumor	TCGA-D7-A747-01	57	MALE
TCGA-AN-A0XO-01A-11R-A109-07	BRCA	tumor	TCGA-AN-A0XO-01	59	FEMALE
TCGA-P3-A6T5-01A-11R-A34R-07	HNSC	tumor	TCGA-P3-A6T5-01	79	FEMALE
TCGA-28-1747-01C-01R-1850-01	GBM	tumor	TCGA-28-1747-01	44	MALE
TCGA-EE-A2A6-06A-11R-A18T-07	SKCM	tumor	TCGA-EE-A2A6-06	43	MALE
TCGA-E2-A56Z-01A-12R-A29R-07	BRCA	tumor	TCGA-E2-A56Z-01	69	FEMALE
TCGA-AF-3400-01A-01R-0821-07	COREAD	tumor	TCGA-AF-3400-01	54	MALE
TCGA-CV-7091-01A-11R-2016-07	HNSC	tumor	TCGA-CV-7091-01	54	MALE
TCGA-2Y-A9GT-01A-11R-A38B-07	LIHC	tumor	TCGA-2Y-A9GT-01	51	MALE
TCGA-EM-A2CJ-01A-11R-A180-07	THCA	tumor	TCGA-EM-A2CJ-01	49	FEMALE
TCGA-E2-A15G-01A-11R-A12D-07	BRCA	tumor	TCGA-E2-A15G-01	76	FEMALE
TCGA-CJ-4874-01A-01R-1305-07	KIRC	tumor	TCGA-CJ-4874-01	73	FEMALE
TCGA-EL-A3GX-01A-11R-A206-07	THCA	tumor	TCGA-EL-A3GX-01	41	FEMALE
TCGA-B5-A11O-01A-11R-A118-07	UCEC	tumor	TCGA-B5-A11O-01	62	FEMALE
TCGA-BP-5202-01A-02R-1426-07	KIRC	tumor	TCGA-BP-5202-01	75	MALE
TCGA-DH-A7UR-01A-11R-A33Z-07	LGG	tumor	TCGA-DH-A7UR-01	59	FEMALE
TCGA-CZ-4860-01A-01R-1305-07	KIRC	tumor	TCGA-CZ-4860-01	60	MALE
TCGA-4A-A93X-01A-11R-A37K-07	KIRP	tumor	TCGA-4A-A93X-01	58	MALE
TCGA-32-1982-01A-01R-1850-01	GBM	tumor	TCGA-32-1982-01	76	FEMALE
TCGA-AP-A052-01A-11R-A00V-07	UCEC	tumor	TCGA-AP-A052-01	59	FEMALE
TCGA-V1-A9OH-01A-11R-A41O-07	PRAD	tumor	TCGA-V1-A9OH-01	63	MALE
TCGA-CN-A49C-01A-11R-A24H-07	HNSC	tumor	TCGA-CN-A49C-01	67	MALE
TCGA-J8-A3YE-01A-12R-A23N-07	THCA	tumor	TCGA-J8-A3YE-01	31	FEMALE
TCGA-EM-A3FK-01A-11R-A21D-07	THCA	tumor	TCGA-EM-A3FK-01	30	FEMALE
TCGA-3N-A9WC-06A-11R-A38C-07	SKCM	tumor	TCGA-3N-A9WC-06	82	MALE
TCGA-M7-A71Y-01A-22R-A32O-07	PRAD	tumor	TCGA-M7-A71Y-01	55	MALE
TCGA-BH-A18K-01A-11R-A12D-07	BRCA	tumor	TCGA-BH-A18K-01	46	FEMALE
TCGA-AB-2984-03A-01T-0734-13	LAML	tumor	TCGA-AB-2984-03	38	MALE
TCGA-DU-5874-01A-11R-1708-07	LGG	tumor	TCGA-DU-5874-01	62	FEMALE
TCGA-44-3917-01A-01R-A278-07	LUAD	tumor	TCGA-44-3917-01	33	FEMALE
TCGA-OR-A5KV-01A-11R-A29S-07	ACC	tumor	TCGA-OR-A5KV-01	17	FEMALE
TCGA-BH-A0B9-01A-11R-A056-07	BRCA	tumor	TCGA-BH-A0B9-01	44	FEMALE
TCGA-DK-A1AF-01A-11R-A13Y-07	BLCA	tumor	TCGA-DK-A1AF-01	85	FEMALE
TCGA-80-5607-01A-31R-1949-07	LUAD	tumor	TCGA-80-5607-01	1	FEMALE
TCGA-CQ-A4C9-01A-11R-A24Z-07	HNSC	tumor	TCGA-CQ-A4C9-01	56	MALE
TCGA-E7-A8O7-01A-11R-A36F-07	BLCA	tumor	TCGA-E7-A8O7-01	52	MALE
TCGA-CQ-6228-01A-11R-1915-07	HNSC	tumor	TCGA-CQ-6228-01	71	FEMALE
TCGA-BR-6455-01A-11R-1802-13	STAD	tumor	TCGA-BR-6455-01	59.86	MALE
TCGA-ER-A19M-06A-61R-A239-07	SKCM	tumor	TCGA-ER-A19M-06	36	MALE
TCGA-A6-6140-01A-11R-1774-07	COREAD	tumor	TCGA-A6-6140-01	62	MALE
TCGA-DD-A1EB-01A-11R-A131-07	LIHC	tumor	TCGA-DD-A1EB-01	72	FEMALE
TCGA-D8-A3Z5-01A-41R-A24H-07	BRCA	tumor	TCGA-D8-A3Z5-01	54	FEMALE
TCGA-62-8397-01A-11R-2326-07	LUAD	tumor	TCGA-62-8397-01	70	FEMALE
TCGA-AB-2866-03A-01T-0736-13	LAML	tumor	TCGA-AB-2866-03	67	MALE
TCGA-AO-A03T-01A-21R-A034-07	BRCA	tumor	TCGA-AO-A03T-01	42	FEMALE
TCGA-ET-A39S-01A-11R-A19O-07	THCA	tumor	TCGA-ET-A39S-01	27	FEMALE
TCGA-50-8460-01A-11R-2326-07	LUAD	tumor	TCGA-50-8460-01	74	MALE
TCGA-EE-A2MC-06A-12R-A18S-07	SKCM	tumor	TCGA-EE-A2MC-06	73	MALE
TCGA-78-7149-01A-11R-2039-07	LUAD	tumor	TCGA-78-7149-01	71	MALE
TCGA-BG-A2AD-01A-21R-A16F-07	UCEC	tumor	TCGA-BG-A2AD-01	63	FEMALE
TCGA-D6-6823-01A-11R-1915-07	HNSC	tumor	TCGA-D6-6823-01	50	MALE
TCGA-34-5928-01A-11R-1820-07	LUSC	tumor	TCGA-34-5928-01	83	FEMALE
TCGA-86-8358-01A-11R-2326-07	LUAD	tumor	TCGA-86-8358-01	44	MALE
TCGA-EI-7002-01A-11R-1928-07	COREAD	tumor	TCGA-EI-7002-01	58	MALE
TCGA-CV-7103-01A-21R-2016-07	HNSC	tumor	TCGA-CV-7103-01	49	MALE
TCGA-UF-A71A-01A-22R-A34R-07	HNSC	tumor	TCGA-UF-A71A-01	67	MALE
TCGA-CQ-7069-01A-11R-2403-07	HNSC	tumor	TCGA-CQ-7069-01	77	FEMALE
TCGA-D5-6926-01A-11R-1928-07	COREAD	tumor	TCGA-D5-6926-01	65	MALE
TCGA-NC-A5HD-01A-11R-A26W-07	LUSC	tumor	TCGA-NC-A5HD-01	79	MALE
TCGA-63-5131-01A-01R-1443-07	LUSC	tumor	TCGA-63-5131-01	1	MALE
TCGA-HC-A6AN-01A-11R-A30B-07	PRAD	tumor	TCGA-HC-A6AN-01	67	MALE
TCGA-DE-A3KN-01A-11R-A20F-07	THCA	tumor	TCGA-DE-A3KN-01	49	FEMALE
TCGA-AB-2807-03A-01T-0734-13	LAML	tumor	TCGA-AB-2807-03	68	FEMALE
TCGA-BQ-5894-01A-11R-1592-07	KIRP	tumor	TCGA-BQ-5894-01	42	MALE
TCGA-BR-4280-01A-01R-1131-13	STAD	tumor	TCGA-BR-4280-01	78.07	FEMALE
TCGA-AB-2830-03A-01T-0736-13	LAML	tumor	TCGA-AB-2830-03	64	FEMALE
TCGA-LL-A5YL-01A-12R-A29R-07	BRCA	tumor	TCGA-LL-A5YL-01	64	FEMALE
TCGA-ET-A3BN-01A-11R-A19O-07	THCA	tumor	TCGA-ET-A3BN-01	33	FEMALE
TCGA-AG-A008-01A-01R-A002-07	COREAD	tumor	TCGA-AG-A008-01	50	FEMALE
TCGA-HN-A2NL-01A-11R-A18M-07	BRCA	tumor	TCGA-HN-A2NL-01	56	FEMALE
TCGA-2A-A8VL-01A-21R-A37L-07	PRAD	tumor	TCGA-2A-A8VL-01	51	1
TCGA-OL-A66O-01A-11R-A31O-07	BRCA	tumor	TCGA-OL-A66O-01	39	FEMALE
TCGA-K4-A5RI-01A-11R-A28M-07	BLCA	tumor	TCGA-K4-A5RI-01	67	FEMALE
TCGA-CR-6484-01A-11R-1873-07	HNSC	tumor	TCGA-CR-6484-01	67	FEMALE
TCGA-DK-A3IV-01A-22R-A21D-07	BLCA	tumor	TCGA-DK-A3IV-01	61	MALE
TCGA-AA-3930-01A-01R-1022-07	COREAD	tumor	TCGA-AA-3930-01	66	MALE
TCGA-ZF-A9RM-01A-11R-A38B-07	BLCA	tumor	TCGA-ZF-A9RM-01	70	MALE
TCGA-66-2771-01A-01R-0980-07	LUSC	tumor	TCGA-66-2771-01	60	MALE
TCGA-BR-7715-01A-11R-2055-13	STAD	tumor	TCGA-BR-7715-01	65.33	MALE
TCGA-B5-A0KB-01B-11R-A14D-07	UCEC	tumor	TCGA-B5-A0KB-01	62	FEMALE
TCGA-KC-A4BV-01A-31R-A26U-07	PRAD	tumor	TCGA-KC-A4BV-01	66	MALE
TCGA-ZS-A9CD-01A-11R-A37K-07	LIHC	tumor	TCGA-ZS-A9CD-01	73	MALE
TCGA-BH-A18P-01A-11R-A12D-07	BRCA	tumor	TCGA-BH-A18P-01	60	FEMALE
TCGA-55-A492-01A-11R-A24H-07	LUAD	tumor	TCGA-55-A492-01	70	FEMALE
TCGA-GM-A2DD-01A-11R-A180-07	BRCA	tumor	TCGA-GM-A2DD-01	53	FEMALE
TCGA-UY-A78P-01A-12R-A36F-07	BLCA	tumor	TCGA-UY-A78P-01	78	FEMALE
TCGA-12-0618-01A-01R-1849-01	GBM	tumor	TCGA-12-0618-01	49	MALE
TCGA-GI-A2C8-01A-11R-A16F-07	BRCA	tumor	TCGA-GI-A2C8-01	63	FEMALE
TCGA-62-A46U-01A-11R-A24H-07	LUAD	tumor	TCGA-62-A46U-01	71	FEMALE
TCGA-BA-6871-01A-11R-1873-07	HNSC	tumor	TCGA-BA-6871-01	75	MALE
TCGA-DI-A2QT-01A-12R-A19W-07	UCEC	tumor	TCGA-DI-A2QT-01	51	FEMALE
TCGA-DK-A6B1-01A-12R-A30C-07	BLCA	tumor	TCGA-DK-A6B1-01	67	MALE
TCGA-BJ-A0Z9-01A-11R-A10U-07	THCA	tumor	TCGA-BJ-A0Z9-01	57	FEMALE
TCGA-22-4599-01A-01R-1443-07	LUSC	tumor	TCGA-22-4599-01	73	FEMALE
TCGA-AO-A0J9-01A-11R-A034-07	BRCA	tumor	TCGA-AO-A0J9-01	61	FEMALE
TCGA-A2-A0ER-01A-21R-A034-07	BRCA	tumor	TCGA-A2-A0ER-01	63	FEMALE
TCGA-EJ-5503-01A-01R-1580-07	PRAD	tumor	TCGA-EJ-5503-01	50	MALE
TCGA-OR-A5JJ-01A-11R-A29S-07	ACC	tumor	TCGA-OR-A5JJ-01	65	MALE
TCGA-B5-A3FC-01A-11R-A22K-07	UCEC	tumor	TCGA-B5-A3FC-01	53	FEMALE
TCGA-B5-A0JV-01A-11R-A104-07	UCEC	tumor	TCGA-B5-A0JV-01	63	FEMALE
TCGA-24-1847-01A-01R-1566-13	OV	tumor	TCGA-24-1847-01	45	FEMALE
TCGA-QK-A6VC-01A-23R-A34R-07	HNSC	tumor	TCGA-QK-A6VC-01	62	FEMALE
TCGA-BP-4329-01A-02R-1289-07	KIRC	tumor	TCGA-BP-4329-01	75	MALE
TCGA-AA-3532-01A-01R-0821-07	COREAD	tumor	TCGA-AA-3532-01	63	MALE
TCGA-WE-A8K6-06A-11R-A37K-07	SKCM	tumor	TCGA-WE-A8K6-06	79	MALE
TCGA-CV-A45W-01A-11R-A24Z-07	HNSC	tumor	TCGA-CV-A45W-01	75	MALE
TCGA-33-4582-01A-01R-1443-07	LUSC	tumor	TCGA-33-4582-01	55	MALE
TCGA-KK-A7AV-01A-11R-A32O-07	PRAD	tumor	TCGA-KK-A7AV-01	58	MALE
TCGA-CV-7440-01A-11R-2132-07	HNSC	tumor	TCGA-CV-7440-01	38	MALE
TCGA-UZ-A9PO-01A-11R-A38C-07	KIRP	tumor	TCGA-UZ-A9PO-01	80	MALE
TCGA-A2-A0EM-01A-11R-A034-07	BRCA	tumor	TCGA-A2-A0EM-01	73	FEMALE
TCGA-BR-6458-01A-11R-1802-13	STAD	tumor	TCGA-BR-6458-01	57.68	FEMALE
TCGA-2A-A8VT-01A-11R-A37L-07	PRAD	tumor	TCGA-2A-A8VT-01	47	MALE
TCGA-A8-A06O-01A-11R-A00Z-07	BRCA	tumor	TCGA-A8-A06O-01	60	FEMALE
TCGA-E9-A1NI-01A-11R-A14D-07	BRCA	tumor	TCGA-E9-A1NI-01	51	FEMALE
TCGA-HD-A6HZ-01A-12R-A31N-07	HNSC	tumor	TCGA-HD-A6HZ-01	79	FEMALE
TCGA-G9-6329-01A-13R-1965-07	PRAD	tumor	TCGA-G9-6329-01	67	MALE
TCGA-BG-A0YU-01A-21R-A10J-07	UCEC	tumor	TCGA-BG-A0YU-01	37	FEMALE
TCGA-BP-4347-01A-01R-1289-07	KIRC	tumor	TCGA-BP-4347-01	74	MALE
TCGA-DK-AA6Q-01A-11R-A39I-07	BLCA	tumor	TCGA-DK-AA6Q-01	61	FEMALE
TCGA-77-8009-01A-11R-2187-07	LUSC	tumor	TCGA-77-8009-01	68	MALE
TCGA-CD-A489-01A-11R-A24K-31	STAD	tumor	TCGA-CD-A489-01	58.91	MALE
TCGA-CJ-4642-01B-01R-1305-07	KIRC	tumor	TCGA-CJ-4642-01	47	MALE
TCGA-EL-A3CM-01A-11R-A19O-07	THCA	tumor	TCGA-EL-A3CM-01	64	FEMALE
TCGA-CH-5753-01A-11R-1580-07	PRAD	tumor	TCGA-CH-5753-01	70	MALE
TCGA-AB-2901-03A-01T-0735-13	LAML	tumor	TCGA-AB-2901-03	27	MALE
TCGA-HT-A5R9-01A-11R-A28M-07	LGG	tumor	TCGA-HT-A5R9-01	48	FEMALE
TCGA-D3-A51H-06A-12R-A266-07	SKCM	tumor	TCGA-D3-A51H-06	60	MALE
TCGA-5P-A9K2-01A-11R-A42S-07	KIRP	tumor	TCGA-5P-A9K2-01	62	MALE
TCGA-VN-A88O-01A-11R-A352-07	PRAD	tumor	TCGA-VN-A88O-01	49	MALE
TCGA-ZF-AA4W-01A-12R-A38B-07	BLCA	tumor	TCGA-ZF-AA4W-01	56	MALE
TCGA-D5-6923-01A-11R-A32Z-07	COREAD	tumor	TCGA-D5-6923-01	57	MALE
TCGA-BR-6563-01A-13R-2055-13	STAD	tumor	TCGA-BR-6563-01	60.06	MALE
TCGA-BT-A42C-01A-11R-A23N-07	BLCA	tumor	TCGA-BT-A42C-01	65	MALE
TCGA-55-8505-01A-11R-2403-07	LUAD	tumor	TCGA-55-8505-01	62	MALE
TCGA-HT-8011-01A-11R-2403-07	LGG	tumor	TCGA-HT-8011-01	55	MALE
TCGA-BQ-7045-01A-31R-1965-07	KIRP	tumor	TCGA-BQ-7045-01	78	MALE
TCGA-28-2514-01A-02R-1850-01	GBM	tumor	TCGA-28-2514-01	45	MALE
TCGA-DJ-A2Q6-01A-11R-A18C-07	THCA	tumor	TCGA-DJ-A2Q6-01	38	FEMALE
TCGA-VN-A88I-01A-11R-A352-07	PRAD	tumor	TCGA-VN-A88I-01	59	MALE
TCGA-XF-AAMG-01A-11R-A42T-07	BLCA	tumor	TCGA-XF-AAMG-01	49	MALE
TCGA-A6-3809-01A-01R-1022-07	COREAD	tumor	TCGA-A6-3809-01	71	FEMALE
TCGA-B4-5378-01A-01R-1503-07	KIRC	tumor	TCGA-B4-5378-01	62	MALE
TCGA-C5-A1MN-01A-11R-A14Y-07	CESC	tumor	TCGA-C5-A1MN-01	42	FEMALE
TCGA-AB-2815-03A-01T-0734-13	LAML	tumor	TCGA-AB-2815-03	49	MALE
TCGA-HC-A6HY-01A-11R-A31N-07	PRAD	tumor	TCGA-HC-A6HY-01	51	MALE
TCGA-DD-AAD3-01A-11R-A41C-07	LIHC	tumor	TCGA-DD-AAD3-01	43	MALE
TCGA-32-2634-01A-01R-1850-01	GBM	tumor	TCGA-32-2634-01	82	MALE
TCGA-EM-A3SY-01A-11R-A22U-07	THCA	tumor	TCGA-EM-A3SY-01	36	MALE
TCGA-60-2695-01A-01R-0851-07	LUSC	tumor	TCGA-60-2695-01	74	FEMALE
TCGA-28-5213-01A-01R-1850-01	GBM	tumor	TCGA-28-5213-01	72	MALE
TCGA-BK-A26L-01A-11R-A16F-07	UCEC	tumor	TCGA-BK-A26L-01	71	FEMALE
TCGA-BP-5198-01A-01R-1426-07	KIRC	tumor	TCGA-BP-5198-01	72	MALE
TCGA-AC-A3YJ-01A-11R-A22U-07	BRCA	tumor	TCGA-AC-A3YJ-01	66	FEMALE
TCGA-AB-2920-03B-01T-0760-13	LAML	tumor	TCGA-AB-2920-03	44	MALE
TCGA-60-2712-01A-01R-0851-07	LUSC	tumor	TCGA-60-2712-01	79	FEMALE
TCGA-CR-7390-01A-11R-2016-07	HNSC	tumor	TCGA-CR-7390-01	67	MALE
TCGA-RD-A7BT-01A-11R-A33Y-31	STAD	tumor	TCGA-RD-A7BT-01	66	MALE
TCGA-EJ-5530-01A-01R-1580-07	PRAD	tumor	TCGA-EJ-5530-01	61	MALE
TCGA-UF-A7JH-01A-21R-A34R-07	HNSC	tumor	TCGA-UF-A7JH-01	59	MALE
TCGA-13-1499-01A-01R-1565-13	OV	tumor	TCGA-13-1499-01	56	FEMALE
TCGA-B8-4143-01A-01R-1188-07	KIRC	tumor	TCGA-B8-4143-01	66	FEMALE
TCGA-29-1766-01A-01R-1567-13	OV	tumor	TCGA-29-1766-01	74	FEMALE
TCGA-97-A4M1-01A-11R-A24X-07	LUAD	tumor	TCGA-97-A4M1-01	52	FEMALE
TCGA-Y8-A8S1-01A-11R-A37K-07	KIRP	tumor	TCGA-Y8-A8S1-01	61	MALE
TCGA-D7-6815-01A-11R-1884-13	STAD	tumor	TCGA-D7-6815-01	70.67	FEMALE
TCGA-A6-4105-01A-02R-1774-07	COREAD	tumor	TCGA-A6-4105-01	79	MALE
TCGA-24-1557-01A-01R-1566-13	OV	tumor	TCGA-24-1557-01	49	FEMALE
TCGA-HU-A4H2-01A-11R-A251-31	STAD	tumor	TCGA-HU-A4H2-01	58.85	FEMALE
TCGA-AR-A254-01A-21R-A169-07	BRCA	tumor	TCGA-AR-A254-01	50	FEMALE
TCGA-EY-A547-01A-11R-A27V-07	UCEC	tumor	TCGA-EY-A547-01	75	FEMALE
TCGA-29-1694-01A-01R-1567-13	OV	tumor	TCGA-29-1694-01	45	FEMALE
TCGA-76-4928-01B-01R-1850-01	GBM	tumor	TCGA-76-4928-01	85	FEMALE
TCGA-AC-A7VC-01A-11R-A352-07	BRCA	tumor	TCGA-AC-A7VC-01	56	FEMALE
TCGA-GL-8500-01A-11R-2404-07	KIRP	tumor	TCGA-GL-8500-01	63	MALE
TCGA-DE-A0Y2-01A-11R-A10U-07	THCA	tumor	TCGA-DE-A0Y2-01	30	FEMALE
TCGA-OL-A5D6-01A-21R-A27Q-07	BRCA	tumor	TCGA-OL-A5D6-01	71	FEMALE
TCGA-G9-6353-01A-11R-1965-07	PRAD	tumor	TCGA-G9-6353-01	58	MALE
TCGA-AC-A2FM-01A-11R-A19W-07	BRCA	tumor	TCGA-AC-A2FM-01	87	FEMALE
TCGA-DK-A1A3-01A-11R-A13Y-07	BLCA	tumor	TCGA-DK-A1A3-01	61	MALE
TCGA-IR-A3LC-01A-11R-A213-07	CESC	tumor	TCGA-IR-A3LC-01	40	FEMALE
TCGA-29-1698-01A-01R-1567-13	OV	tumor	TCGA-29-1698-01	53	FEMALE
TCGA-EM-A3FQ-06A-11R-A21D-07	THCA	tumor	TCGA-EM-A3FQ-06	19	FEMALE
TCGA-06-0157-01A-01R-1849-01	GBM	tumor	TCGA-06-0157-01	63	FEMALE
TCGA-P3-A5QF-01A-11R-A28V-07	HNSC	tumor	TCGA-P3-A5QF-01	49	MALE
TCGA-A6-5656-01A-21R-A278-07	COREAD	tumor	TCGA-A6-5656-01	74	MALE
TCGA-DV-5576-01A-01R-1541-07	KIRC	tumor	TCGA-DV-5576-01	55	FEMALE
TCGA-VQ-A8E0-01A-11R-A414-31	STAD	tumor	TCGA-VQ-A8E0-01	68	MALE
TCGA-XF-A9T0-01A-11R-A39I-07	BLCA	tumor	TCGA-XF-A9T0-01	68	MALE
TCGA-MX-A666-01A-11R-A31P-31	STAD	tumor	TCGA-MX-A666-01	61	MALE
TCGA-DH-5144-01A-01R-1470-07	LGG	tumor	TCGA-DH-5144-01	56	FEMALE
TCGA-HC-7748-01A-11R-2118-07	PRAD	tumor	TCGA-HC-7748-01	60	MALE
TCGA-ET-A40T-01A-11R-A23N-07	THCA	tumor	TCGA-ET-A40T-01	26	FEMALE
TCGA-EL-A4K0-01A-11R-A250-07	THCA	tumor	TCGA-EL-A4K0-01	54	FEMALE
TCGA-UF-A71D-01A-12R-A34R-07	HNSC	tumor	TCGA-UF-A71D-01	54	FEMALE
TCGA-CZ-5469-01A-01R-1503-07	KIRC	tumor	TCGA-CZ-5469-01	41	MALE
TCGA-06-2558-01A-01R-1849-01	GBM	tumor	TCGA-06-2558-01	75	FEMALE
TCGA-D7-8575-01A-11R-2343-13	STAD	tumor	TCGA-D7-8575-01	75.87	MALE
TCGA-CU-A72E-01A-12R-A33J-07	BLCA	tumor	TCGA-CU-A72E-01	76	MALE
TCGA-F6-A8O4-01A-11R-A36H-07	LGG	tumor	TCGA-F6-A8O4-01	44	MALE
TCGA-EI-6513-01A-21R-1736-07	COREAD	tumor	TCGA-EI-6513-01	59	MALE
TCGA-CV-7413-01A-11R-2081-07	HNSC	tumor	TCGA-CV-7413-01	74	FEMALE
TCGA-CJ-4878-01A-01R-1305-07	KIRC	tumor	TCGA-CJ-4878-01	71	FEMALE
TCGA-CQ-6227-01A-11R-1915-07	HNSC	tumor	TCGA-CQ-6227-01	77	MALE
TCGA-G5-6572-02A-12R-1830-07	COREAD	tumor	TCGA-G5-6572-02	56	MALE
TCGA-F5-6812-01A-11R-1830-07	COREAD	tumor	TCGA-F5-6812-01	67	MALE
TCGA-SL-A6J9-01A-11R-A31O-07	UCEC	tumor	TCGA-SL-A6J9-01	73	FEMALE
TCGA-AB-2980-03A-01T-0734-13	LAML	tumor	TCGA-AB-2980-03	50	MALE
TCGA-UB-A7ME-01A-11R-A33J-07	LIHC	tumor	TCGA-UB-A7ME-01	51	MALE
TCGA-A3-3352-01A-01R-0864-07	KIRC	tumor	TCGA-A3-3352-01	74	MALE
TCGA-BH-A208-01A-11R-A157-07	BRCA	tumor	TCGA-BH-A208-01	48	FEMALE
TCGA-5P-A9JY-01A-11R-A42S-07	KIRP	tumor	TCGA-5P-A9JY-01	79	MALE
TCGA-AP-A0LP-01A-12R-A104-07	UCEC	tumor	TCGA-AP-A0LP-01	76	FEMALE
TCGA-VS-A8Q8-01A-11R-A37O-07	CESC	tumor	TCGA-VS-A8Q8-01	26	FEMALE
TCGA-FV-A496-01A-11R-A266-07	LIHC	tumor	TCGA-FV-A496-01	84	FEMALE
TCGA-TQ-A7RO-01A-11R-A33Z-07	LGG	tumor	TCGA-TQ-A7RO-01	29	MALE
TCGA-CG-5721-01A-11R-1602-13	STAD	tumor	TCGA-CG-5721-01	58.16	MALE
TCGA-06-0184-01A-01R-1849-01	GBM	tumor	TCGA-06-0184-01	63	MALE
TCGA-HC-A631-01A-11R-A29R-07	PRAD	tumor	TCGA-HC-A631-01	67	MALE
TCGA-NJ-A4YG-01A-22R-A262-07	LUAD	tumor	TCGA-NJ-A4YG-01	65	MALE
TCGA-50-6673-01A-11R-1949-07	LUAD	tumor	TCGA-50-6673-01	84	FEMALE
TCGA-5M-AATE-01A-11R-A41B-07	COREAD	tumor	TCGA-5M-AATE-01	76	MALE
TCGA-FS-A1ZZ-06A-11R-A18S-07	SKCM	tumor	TCGA-FS-A1ZZ-06	54	FEMALE
TCGA-62-8395-01A-11R-2326-07	LUAD	tumor	TCGA-62-8395-01	80	FEMALE
TCGA-CD-8528-01A-11R-2343-13	STAD	tumor	TCGA-CD-8528-01	43.77	FEMALE
TCGA-CC-A7IK-01A-12R-A33R-07	LIHC	tumor	TCGA-CC-A7IK-01	59	MALE
TCGA-85-8479-01A-11R-2326-07	LUSC	tumor	TCGA-85-8479-01	66	MALE
TCGA-BP-4763-01A-01R-1289-07	KIRC	tumor	TCGA-BP-4763-01	79	FEMALE
TCGA-AB-2946-03A-01T-0740-13	LAML	tumor	TCGA-AB-2946-03	41	MALE
TCGA-EY-A1GE-01A-11R-A13S-07	UCEC	tumor	TCGA-EY-A1GE-01	67	FEMALE
TCGA-G8-6909-01A-11R-2213-07	DLBC	tumor	TCGA-G8-6909-01	67	MALE
TCGA-DJ-A13R-01A-11R-A10U-07	THCA	tumor	TCGA-DJ-A13R-01	50	MALE
TCGA-38-6178-01A-11R-1755-07	LUAD	tumor	TCGA-38-6178-01	70	FEMALE
TCGA-TQ-A7RV-02A-11R-A36H-07	LGG	tumor	TCGA-TQ-A7RV-02	27	MALE
TCGA-BH-A0EE-01A-11R-A034-07	BRCA	tumor	TCGA-BH-A0EE-01	68	FEMALE
TCGA-A6-2679-01A-02R-1410-07	COREAD	tumor	TCGA-A6-2679-01	73	FEMALE
TCGA-44-6147-01A-11R-1755-07	LUAD	tumor	TCGA-44-6147-01	67	FEMALE
TCGA-DB-5278-01A-01R-1470-07	LGG	tumor	TCGA-DB-5278-01	17	MALE
TCGA-FE-A235-01A-11R-A16R-07	THCA	tumor	TCGA-FE-A235-01	26	FEMALE
TCGA-38-A44F-01A-11R-A24H-07	LUAD	tumor	TCGA-38-A44F-01	80	MALE
TCGA-A4-7288-01A-11R-A32Z-07	KIRP	tumor	TCGA-A4-7288-01	71	FEMALE
TCGA-22-1002-01A-01R-0692-07	LUSC	tumor	TCGA-22-1002-01	69	MALE
TCGA-YL-A8SL-01B-21R-A37L-07	PRAD	tumor	TCGA-YL-A8SL-01	74	MALE
TCGA-A7-A0DB-01A-11R-A00Z-07	BRCA	tumor	TCGA-A7-A0DB-01	56	FEMALE
TCGA-ER-A19K-01A-21R-A18T-07	SKCM	tumor	TCGA-ER-A19K-01	79	FEMALE
TCGA-DD-AADP-01A-11R-A39D-07	LIHC	tumor	TCGA-DD-AADP-01	45	MALE
TCGA-DK-A3X1-01A-12R-A22U-07	BLCA	tumor	TCGA-DK-A3X1-01	79	FEMALE
TCGA-OR-A5LS-01A-11R-A29S-07	ACC	tumor	TCGA-OR-A5LS-01	34	FEMALE
TCGA-A5-A0G2-01A-11R-A16W-07	UCEC	tumor	TCGA-A5-A0G2-01	57	FEMALE
TCGA-D3-A2JN-06A-11R-A18S-07	SKCM	tumor	TCGA-D3-A2JN-06	46	FEMALE
TCGA-DU-A7T8-01A-21R-A34R-07	LGG	tumor	TCGA-DU-A7T8-01	35	MALE
TCGA-60-2696-01A-01R-0851-07	LUSC	tumor	TCGA-60-2696-01	76	FEMALE
TCGA-B5-A11E-01A-11R-A10J-07	UCEC	tumor	TCGA-B5-A11E-01	53	FEMALE
TCGA-AK-3465-01A-02R-1325-07	KIRC	tumor	TCGA-AK-3465-01	71	FEMALE
TCGA-B5-A1MZ-01A-11R-A144-07	UCEC	tumor	TCGA-B5-A1MZ-01	54	FEMALE
TCGA-EL-A3ZS-01A-12R-A23N-07	THCA	tumor	TCGA-EL-A3ZS-01	22	FEMALE
TCGA-OR-A5JR-01A-11R-A29S-07	ACC	tumor	TCGA-OR-A5JR-01	45	MALE
TCGA-19-4065-02A-11R-2005-01	GBM	tumor	TCGA-19-4065-02	36	MALE
TCGA-13-0905-01B-01R-1565-13	OV	tumor	TCGA-13-0905-01	51	FEMALE
TCGA-AK-3451-01A-02R-1188-07	KIRC	tumor	TCGA-AK-3451-01	48	MALE
TCGA-77-A5G6-01A-11R-A27Q-07	LUSC	tumor	TCGA-77-A5G6-01	66	MALE
TCGA-OL-A66K-01A-11R-A29R-07	BRCA	tumor	TCGA-OL-A66K-01	72	FEMALE
TCGA-D8-A1JI-01A-11R-A13Q-07	BRCA	tumor	TCGA-D8-A1JI-01	54	FEMALE
TCGA-FY-A3R8-01A-11R-A220-07	THCA	tumor	TCGA-FY-A3R8-01	62	FEMALE
TCGA-68-A59I-01A-11R-A262-07	LUSC	tumor	TCGA-68-A59I-01	73	FEMALE
TCGA-Q1-A5R3-01A-11R-A28H-07	CESC	tumor	TCGA-Q1-A5R3-01	56	FEMALE
TCGA-G9-6384-01A-11R-1789-07	PRAD	tumor	TCGA-G9-6384-01	53	MALE
TCGA-95-A4VP-01A-21R-A262-07	LUAD	tumor	TCGA-95-A4VP-01	66	FEMALE
TCGA-OR-A5LK-01A-11R-A29S-07	ACC	tumor	TCGA-OR-A5LK-01	62	MALE
TCGA-D8-A1XM-01A-21R-A14M-07	BRCA	tumor	TCGA-D8-A1XM-01	57	FEMALE
TCGA-E9-A22B-01A-11R-A157-07	BRCA	tumor	TCGA-E9-A22B-01	71	FEMALE
TCGA-23-1107-01A-01R-1564-13	OV	tumor	TCGA-23-1107-01	NA	NA
TCGA-HC-7210-01A-11R-2118-07	PRAD	tumor	TCGA-HC-7210-01	74	MALE
TCGA-EO-A3L0-01A-11R-A22K-07	UCEC	tumor	TCGA-EO-A3L0-01	76	FEMALE
TCGA-D8-A1XD-01A-11R-A14D-07	BRCA	tumor	TCGA-D8-A1XD-01	36	FEMALE
TCGA-D1-A2G5-01A-11R-A17B-07	UCEC	tumor	TCGA-D1-A2G5-01	50	FEMALE
TCGA-BR-4201-01A-01R-1131-13	STAD	tumor	TCGA-BR-4201-01	66.68	FEMALE
TCGA-HC-8258-01B-05R-2302-07	PRAD	tumor	TCGA-HC-8258-01	56	MALE
TCGA-61-1741-01A-02R-1567-13	OV	tumor	TCGA-61-1741-01	76	FEMALE
TCGA-UY-A9PB-01A-11R-A38B-07	BLCA	tumor	TCGA-UY-A9PB-01	49	MALE
TCGA-A8-A07S-01A-11R-A034-07	BRCA	tumor	TCGA-A8-A07S-01	73	FEMALE
TCGA-F5-6861-01A-11R-1928-07	COREAD	tumor	TCGA-F5-6861-01	60	FEMALE
TCGA-FU-A5XV-01A-11R-A28H-07	CESC	tumor	TCGA-FU-A5XV-01	32	FEMALE
TCGA-TQ-A7RG-01A-11R-A33Z-07	LGG	tumor	TCGA-TQ-A7RG-01	36	MALE
TCGA-BR-8677-01A-11R-2402-13	STAD	tumor	TCGA-BR-8677-01	74.53	FEMALE
TCGA-QK-A6IH-01A-11R-A31N-07	HNSC	tumor	TCGA-QK-A6IH-01	65	FEMALE
TCGA-BJ-A192-01A-31R-A13Y-07	THCA	tumor	TCGA-BJ-A192-01	54	FEMALE
TCGA-CZ-5463-01A-01R-1503-07	KIRC	tumor	TCGA-CZ-5463-01	76	MALE
TCGA-CN-4740-01A-01R-1436-07	HNSC	tumor	TCGA-CN-4740-01	79	FEMALE
TCGA-HT-A61B-01A-11R-A29R-07	LGG	tumor	TCGA-HT-A61B-01	22	MALE
TCGA-N5-A4RM-01A-11R-A28V-07	UCS	tumor	TCGA-N5-A4RM-01	62	FEMALE
TCGA-W3-AA1W-06A-11R-A38C-07	SKCM	tumor	TCGA-W3-AA1W-06	64	MALE
TCGA-CQ-A4CD-01A-21R-A24Z-07	HNSC	tumor	TCGA-CQ-A4CD-01	69	MALE
TCGA-LD-A9QF-01A-32R-A41B-07	BRCA	tumor	TCGA-LD-A9QF-01	73	FEMALE
TCGA-A2-A25C-01A-11R-A169-07	BRCA	tumor	TCGA-A2-A25C-01	50	FEMALE
TCGA-37-3789-01A-01R-0980-07	LUSC	tumor	TCGA-37-3789-01	65	MALE
TCGA-HM-A3JK-01A-11R-A32Y-07	CESC	tumor	TCGA-HM-A3JK-01	64	FEMALE
TCGA-BR-8380-01A-11R-2343-13	STAD	tumor	TCGA-BR-8380-01	55.19	MALE
TCGA-GV-A40G-01A-11R-A23N-07	BLCA	tumor	TCGA-GV-A40G-01	77	MALE
TCGA-52-7810-01A-11R-2125-07	LUSC	tumor	TCGA-52-7810-01	60	FEMALE
TCGA-FS-A1ZR-06A-21R-A18U-07	SKCM	tumor	TCGA-FS-A1ZR-06	36	MALE
TCGA-G5-6641-01A-11R-A32Z-07	COREAD	tumor	TCGA-G5-6641-01	67	MALE
TCGA-GN-A4U3-06A-11R-A32P-07	SKCM	tumor	TCGA-GN-A4U3-06	30	MALE
TCGA-85-8354-01A-31R-2326-07	LUSC	tumor	TCGA-85-8354-01	53	MALE
TCGA-04-1332-01A-01R-1564-13	OV	tumor	TCGA-04-1332-01	70	FEMALE
TCGA-DU-A76K-01A-11R-A33Z-07	LGG	tumor	TCGA-DU-A76K-01	87	MALE
TCGA-E1-A7YJ-01A-11R-A34F-07	LGG	tumor	TCGA-E1-A7YJ-01	55	MALE
TCGA-60-2726-01A-01R-0851-07	LUSC	tumor	TCGA-60-2726-01	56	MALE
TCGA-HC-7742-01A-11R-2118-07	PRAD	tumor	TCGA-HC-7742-01	58	MALE
TCGA-CD-A48C-01A-11R-A24K-31	STAD	tumor	TCGA-CD-A48C-01	79.95	FEMALE
TCGA-B0-4945-01A-01R-1420-07	KIRC	tumor	TCGA-B0-4945-01	75	FEMALE
TCGA-66-2794-01A-01R-1201-07	LUSC	tumor	TCGA-66-2794-01	64	MALE
TCGA-D1-A3DA-01A-12R-A213-07	UCEC	tumor	TCGA-D1-A3DA-01	77	FEMALE
TCGA-MP-A4TE-01A-22R-A466-07	LUAD	tumor	TCGA-MP-A4TE-01	56	MALE
TCGA-BW-A5NP-01A-11R-A27V-07	LIHC	tumor	TCGA-BW-A5NP-01	26	FEMALE
TCGA-XC-AA0X-01A-32R-A405-07	LUSC	tumor	TCGA-XC-AA0X-01	77	FEMALE
TCGA-NJ-A55O-01A-11R-A262-07	LUAD	tumor	TCGA-NJ-A55O-01	56	FEMALE
TCGA-DW-5561-01A-01R-1592-07	KIRP	tumor	TCGA-DW-5561-01	51	MALE
TCGA-B8-4146-01B-11R-1672-07	KIRC	tumor	TCGA-B8-4146-01	41	FEMALE
TCGA-CV-7180-01A-11R-2016-07	HNSC	tumor	TCGA-CV-7180-01	34	MALE
TCGA-25-2409-01A-01R-1569-13	OV	tumor	TCGA-25-2409-01	71	FEMALE
TCGA-26-5132-01A-01R-1850-01	GBM	tumor	TCGA-26-5132-01	74	MALE
TCGA-S9-A6U9-01A-11R-A32Q-07	LGG	tumor	TCGA-S9-A6U9-01	36	MALE
TCGA-59-2352-01A-01R-1569-13	OV	tumor	TCGA-59-2352-01	78	FEMALE
TCGA-CC-A9FW-01A-11R-A37K-07	LIHC	tumor	TCGA-CC-A9FW-01	68	MALE
TCGA-EM-A4FH-01A-11R-A250-07	THCA	tumor	TCGA-EM-A4FH-01	69	MALE
TCGA-KK-A5A1-01A-11R-A29R-07	PRAD	tumor	TCGA-KK-A5A1-01	72	MALE
TCGA-HU-A4H5-01A-21R-A251-31	STAD	tumor	TCGA-HU-A4H5-01	71.82	MALE
TCGA-BR-8683-01A-11R-2402-13	STAD	tumor	TCGA-BR-8683-01	75.42	MALE
TCGA-85-A50M-01A-21R-A262-07	LUSC	tumor	TCGA-85-A50M-01	47	MALE
TCGA-EB-A42Y-01A-12R-A24X-07	SKCM	tumor	TCGA-EB-A42Y-01	73	FEMALE
TCGA-13-0901-01B-01R-1565-13	OV	tumor	TCGA-13-0901-01	41	FEMALE
TCGA-D3-A1Q9-06A-11R-A18T-07	SKCM	tumor	TCGA-D3-A1Q9-06	72	MALE
TCGA-D5-6541-01A-11R-1723-07	COREAD	tumor	TCGA-D5-6541-01	49	MALE
TCGA-BA-7269-01A-11R-2016-07	HNSC	tumor	TCGA-BA-7269-01	61	MALE
TCGA-44-7667-01A-31R-2066-07	LUAD	tumor	TCGA-44-7667-01	49	FEMALE
TCGA-D7-6822-01A-11R-1884-13	STAD	tumor	TCGA-D7-6822-01	77.25	MALE
TCGA-27-2528-01A-01R-1850-01	GBM	tumor	TCGA-27-2528-01	62	MALE
TCGA-EY-A2OQ-01A-11R-A19W-07	UCEC	tumor	TCGA-EY-A2OQ-01	61	FEMALE
TCGA-E9-A1R2-01A-11R-A14D-07	BRCA	tumor	TCGA-E9-A1R2-01	51	FEMALE
TCGA-UF-A7JF-01A-11R-A34R-07	HNSC	tumor	TCGA-UF-A7JF-01	80	MALE
TCGA-GU-A762-01A-11R-A33J-07	BLCA	tumor	TCGA-GU-A762-01	87	MALE
TCGA-QG-A5YV-01A-11R-A28H-07	COREAD	tumor	TCGA-QG-A5YV-01	64	FEMALE
TCGA-S9-A6U5-01A-12R-A33Z-07	LGG	tumor	TCGA-S9-A6U5-01	33	MALE
TCGA-P5-A781-01A-11R-A32Q-07	LGG	tumor	TCGA-P5-A781-01	34	FEMALE
TCGA-55-8299-01A-11R-2287-07	LUAD	tumor	TCGA-55-8299-01	61	FEMALE
TCGA-CZ-5459-01A-01R-1503-07	KIRC	tumor	TCGA-CZ-5459-01	63	MALE
TCGA-XJ-A83F-01A-11R-A352-07	PRAD	tumor	TCGA-XJ-A83F-01	67	MALE
TCGA-EM-A2CK-01A-11R-A180-07	THCA	tumor	TCGA-EM-A2CK-01	28	MALE
TCGA-CZ-5987-01A-11R-1672-07	KIRC	tumor	TCGA-CZ-5987-01	60	MALE
TCGA-IZ-8196-01A-11R-2404-07	KIRP	tumor	TCGA-IZ-8196-01	50	MALE
TCGA-FS-A1Z0-06A-11R-A18T-07	SKCM	tumor	TCGA-FS-A1Z0-06	32	FEMALE
TCGA-A4-8311-01A-11R-2404-07	KIRP	tumor	TCGA-A4-8311-01	60	MALE
TCGA-86-8076-01A-31R-2241-07	LUAD	tumor	TCGA-86-8076-01	42	MALE
TCGA-EM-A4FQ-01A-11R-A250-07	THCA	tumor	TCGA-EM-A4FQ-01	42	FEMALE
TCGA-24-2254-01A-01R-1568-13	OV	tumor	TCGA-24-2254-01	66	FEMALE
TCGA-FD-A6TD-01A-51R-A33J-07	BLCA	tumor	TCGA-FD-A6TD-01	77	MALE
TCGA-A6-2680-01A-01R-1410-07	COREAD	tumor	TCGA-A6-2680-01	72	FEMALE
TCGA-D7-6525-01A-11R-1802-13	STAD	tumor	TCGA-D7-6525-01	58.11	MALE
TCGA-AR-A1AM-01A-41R-A22K-07	BRCA	tumor	TCGA-AR-A1AM-01	52	FEMALE
TCGA-46-3767-01A-01R-0980-07	LUSC	tumor	TCGA-46-3767-01	76	MALE
TCGA-56-8305-01A-11R-2296-07	LUSC	tumor	TCGA-56-8305-01	72	MALE
TCGA-P5-A5F2-01A-11R-A28M-07	LGG	tumor	TCGA-P5-A5F2-01	36	FEMALE
TCGA-D8-A27F-01A-11R-A16F-07	BRCA	tumor	TCGA-D8-A27F-01	40	FEMALE
TCGA-DD-AACD-01A-11R-A41C-07	LIHC	tumor	TCGA-DD-AACD-01	48	MALE
TCGA-DE-A4MD-01A-11R-A250-07	THCA	tumor	TCGA-DE-A4MD-01	71	MALE
TCGA-A6-6142-01A-11R-1774-07	COREAD	tumor	TCGA-A6-6142-01	56	FEMALE
TCGA-AG-3587-01A-01R-0821-07	COREAD	tumor	TCGA-AG-3587-01	65	MALE
TCGA-EJ-5522-01A-01R-1580-07	PRAD	tumor	TCGA-EJ-5522-01	51	MALE
TCGA-EW-A3U0-01A-11R-A22K-07	BRCA	tumor	TCGA-EW-A3U0-01	61	FEMALE
TCGA-EA-A556-01A-11R-A26T-07	CESC	tumor	TCGA-EA-A556-01	38	FEMALE
TCGA-44-8119-01A-11R-2241-07	LUAD	tumor	TCGA-44-8119-01	73	MALE
TCGA-06-0211-01A-01R-1849-01	GBM	tumor	TCGA-06-0211-01	47	MALE
TCGA-B6-A1KI-01A-11R-A14M-07	BRCA	tumor	TCGA-B6-A1KI-01	63	FEMALE
TCGA-XK-AAJ3-01A-11R-A41O-07	PRAD	tumor	TCGA-XK-AAJ3-01	56	MALE
TCGA-CJ-4636-01A-02R-1325-07	KIRC	tumor	TCGA-CJ-4636-01	51	MALE
TCGA-39-5039-01A-01R-1443-07	LUSC	tumor	TCGA-39-5039-01	76	MALE
TCGA-MT-A51X-01A-11R-A266-07	HNSC	tumor	TCGA-MT-A51X-01	30	MALE
TCGA-UZ-A9PS-05A-11R-A42S-07	KIRP	tumor	TCGA-UZ-A9PS-05	62	FEMALE
TCGA-ND-A4WF-01A-11R-A28V-07	UCS	tumor	TCGA-ND-A4WF-01	77	FEMALE
TCGA-AX-A05W-01A-21R-A466-07	UCEC	tumor	TCGA-AX-A05W-01	60	FEMALE
TCGA-CV-5976-01A-11R-1686-07	HNSC	tumor	TCGA-CV-5976-01	50	MALE
TCGA-DD-AAE7-01A-11R-A41C-07	LIHC	tumor	TCGA-DD-AAE7-01	72	MALE
TCGA-A4-7997-01A-11R-2204-07	KIRP	tumor	TCGA-A4-7997-01	67	MALE
TCGA-AG-3732-01A-11R-1660-07	COREAD	tumor	TCGA-AG-3732-01	78	FEMALE
TCGA-AZ-6605-01A-11R-1839-07	COREAD	tumor	TCGA-AZ-6605-01	77	MALE
TCGA-A7-A13F-01A-11R-A12P-07	BRCA	tumor	TCGA-A7-A13F-01	44	FEMALE
TCGA-BG-A186-01A-11R-A12I-07	UCEC	tumor	TCGA-BG-A186-01	61	FEMALE
TCGA-61-2104-01A-01R-1568-13	OV	tumor	TCGA-61-2104-01	53	FEMALE
TCGA-N5-A59E-01A-11R-A28V-07	UCS	tumor	TCGA-N5-A59E-01	62	FEMALE
TCGA-KK-A8IK-01A-11R-A36G-07	PRAD	tumor	TCGA-KK-A8IK-01	56	MALE
TCGA-D1-A3DG-01A-11R-A19W-07	UCEC	tumor	TCGA-D1-A3DG-01	81	FEMALE
TCGA-44-3398-01A-01R-1107-07	LUAD	tumor	TCGA-44-3398-01	77	FEMALE
TCGA-AR-A1AO-01A-11R-A12P-07	BRCA	tumor	TCGA-AR-A1AO-01	47	FEMALE
TCGA-BC-A8YO-01A-11R-A37K-07	LIHC	tumor	TCGA-BC-A8YO-01	66	FEMALE
TCGA-28-5209-01A-01R-1850-01	GBM	tumor	TCGA-28-5209-01	66	FEMALE
TCGA-RP-A694-06A-11R-A311-07	SKCM	tumor	TCGA-RP-A694-06	71	MALE
TCGA-BR-8060-01A-11R-2343-13	STAD	tumor	TCGA-BR-8060-01	75	FEMALE
TCGA-EL-A3CV-01A-11R-A19O-07	THCA	tumor	TCGA-EL-A3CV-01	40	MALE
TCGA-C5-A7CO-01A-11R-A352-07	CESC	tumor	TCGA-C5-A7CO-01	68	FEMALE
TCGA-AR-A24L-01A-11R-A169-07	BRCA	tumor	TCGA-AR-A24L-01	26	FEMALE
TCGA-CR-7365-01A-11R-2016-07	HNSC	tumor	TCGA-CR-7365-01	60	MALE
TCGA-CX-A4AQ-01A-11R-A24Z-07	HNSC	tumor	TCGA-CX-A4AQ-01	56	MALE
TCGA-BR-8484-01A-11R-2402-13	STAD	tumor	TCGA-BR-8484-01	61.83	MALE
TCGA-56-7822-01A-11R-2125-07	LUSC	tumor	TCGA-56-7822-01	75	MALE
TCGA-AL-7173-01A-11R-2139-07	KIRP	tumor	TCGA-AL-7173-01	72	FEMALE
TCGA-HM-A6W2-06A-22R-A33Z-07	CESC	tumor	TCGA-HM-A6W2-06	34	FEMALE
TCGA-ET-A3BQ-01B-11R-A206-07	THCA	tumor	TCGA-ET-A3BQ-01	27	FEMALE
TCGA-BP-4799-01A-01R-1305-07	KIRC	tumor	TCGA-BP-4799-01	70	MALE
TCGA-J4-A6G3-01A-11R-A311-07	PRAD	tumor	TCGA-J4-A6G3-01	57	MALE
TCGA-FW-A3TV-06A-11R-A239-07	SKCM	tumor	TCGA-FW-A3TV-06	57	FEMALE
TCGA-60-2719-01A-01R-0851-07	LUSC	tumor	TCGA-60-2719-01	83	FEMALE
TCGA-25-1321-01A-01R-1565-13	OV	tumor	TCGA-25-1321-01	65	FEMALE
TCGA-M7-A723-01A-12R-A32O-07	PRAD	tumor	TCGA-M7-A723-01	54	MALE
TCGA-39-5034-01A-01R-1443-07	LUSC	tumor	TCGA-39-5034-01	73	FEMALE
TCGA-AB-2860-03A-01T-0736-13	LAML	tumor	TCGA-AB-2860-03	60	FEMALE
TCGA-86-8054-01A-11R-2241-07	LUAD	tumor	TCGA-86-8054-01	61	MALE
TCGA-A8-A08X-01A-21R-A00Z-07	BRCA	tumor	TCGA-A8-A08X-01	43	FEMALE
TCGA-DU-6407-02A-12R-A36H-07	LGG	tumor	TCGA-DU-6407-02	35	FEMALE
TCGA-A8-A07G-01A-11R-A034-07	BRCA	tumor	TCGA-A8-A07G-01	65	FEMALE
TCGA-3K-AAZ8-01A-12R-A39D-07	LIHC	tumor	TCGA-3K-AAZ8-01	65	MALE
TCGA-92-7340-01A-21R-2045-07	LUSC	tumor	TCGA-92-7340-01	45	FEMALE
TCGA-BH-A0E2-01A-11R-A056-07	BRCA	tumor	TCGA-BH-A0E2-01	49	FEMALE
TCGA-AX-A1CF-01A-11R-A137-07	UCEC	tumor	TCGA-AX-A1CF-01	69	FEMALE
TCGA-DU-A7TC-01A-21R-A34R-07	LGG	tumor	TCGA-DU-A7TC-01	32	MALE
TCGA-AA-3846-01A-01R-1022-07	COREAD	tumor	TCGA-AA-3846-01	74	FEMALE
TCGA-FA-8693-01A-11R-2404-07	DLBC	tumor	TCGA-FA-8693-01	1	1
TCGA-20-1687-01A-01R-1566-13	OV	tumor	TCGA-20-1687-01	46	FEMALE
TCGA-24-1104-01A-01R-1565-13	OV	tumor	TCGA-24-1104-01	56	FEMALE
TCGA-A2-A0YL-01A-21R-A109-07	BRCA	tumor	TCGA-A2-A0YL-01	48	FEMALE
TCGA-06-5413-01A-01R-1849-01	GBM	tumor	TCGA-06-5413-01	67	MALE
TCGA-B5-A0JR-01A-13R-A466-07	UCEC	tumor	TCGA-B5-A0JR-01	73	FEMALE
TCGA-IR-A3LL-01A-11R-A213-07	CESC	tumor	TCGA-IR-A3LL-01	60	FEMALE
TCGA-25-2404-01A-01R-1569-13	OV	tumor	TCGA-25-2404-01	38	FEMALE
TCGA-BH-A0EB-01A-11R-A034-07	BRCA	tumor	TCGA-BH-A0EB-01	69	FEMALE
TCGA-GN-A265-06A-21R-A18T-07	SKCM	tumor	TCGA-GN-A265-06	53	MALE
TCGA-95-7944-01A-11R-2187-07	LUAD	tumor	TCGA-95-7944-01	71	MALE
TCGA-CC-5260-01A-01R-A131-07	LIHC	tumor	TCGA-CC-5260-01	61	FEMALE
TCGA-DU-5852-01A-11R-1708-07	LGG	tumor	TCGA-DU-5852-01	61	FEMALE
TCGA-78-7154-01A-11R-2039-07	LUAD	tumor	TCGA-78-7154-01	72	MALE
TCGA-AO-A0JG-01A-31R-A084-07	BRCA	tumor	TCGA-AO-A0JG-01	49	FEMALE
TCGA-23-1109-01A-01R-1564-13	OV	tumor	TCGA-23-1109-01	62	FEMALE
TCGA-A2-A0ET-01A-31R-A034-07	BRCA	tumor	TCGA-A2-A0ET-01	58	FEMALE
TCGA-85-8071-01A-11R-2247-07	LUSC	tumor	TCGA-85-8071-01	52	MALE
TCGA-C5-A1BJ-01A-11R-A13Y-07	CESC	tumor	TCGA-C5-A1BJ-01	34	FEMALE
TCGA-AO-A1KT-01A-11R-A13Q-07	BRCA	tumor	TCGA-AO-A1KT-01	78	FEMALE
TCGA-D1-A175-01A-11R-A12I-07	UCEC	tumor	TCGA-D1-A175-01	48	FEMALE
TCGA-29-A5NZ-01A-11R-A406-31	OV	tumor	TCGA-29-A5NZ-01	66	FEMALE
TCGA-BP-4771-01A-01R-1289-07	KIRC	tumor	TCGA-BP-4771-01	62	MALE
TCGA-A3-3313-01A-02R-1325-07	KIRC	tumor	TCGA-A3-3313-01	59	MALE
TCGA-CS-6188-01A-11R-1896-07	LGG	tumor	TCGA-CS-6188-01	48	MALE
TCGA-RD-A8MV-01A-11R-A36D-31	STAD	tumor	TCGA-RD-A8MV-01	56	MALE
TCGA-VQ-AA6B-01A-11R-A414-31	STAD	tumor	TCGA-VQ-AA6B-01	48	MALE
TCGA-KB-A93H-01A-11R-A39E-31	STAD	tumor	TCGA-KB-A93H-01	79	FEMALE
TCGA-S3-AA10-01A-21R-A41B-07	BRCA	tumor	TCGA-S3-AA10-01	65	FEMALE
TCGA-DD-A4NH-01A-11R-A27V-07	LIHC	tumor	TCGA-DD-A4NH-01	65	FEMALE
TCGA-HF-7133-01A-11R-2055-13	STAD	tumor	TCGA-HF-7133-01	1	FEMALE
TCGA-3C-AALI-01A-11R-A41B-07	BRCA	tumor	TCGA-3C-AALI-01	50	FEMALE
TCGA-A6-2672-01A-01R-0826-07	COREAD	tumor	TCGA-A6-2672-01	82	FEMALE
TCGA-22-A5C4-01A-12R-A27Q-07	LUSC	tumor	TCGA-22-A5C4-01	70	MALE
TCGA-67-6217-01A-11R-1755-07	LUAD	tumor	TCGA-67-6217-01	73	FEMALE
TCGA-EE-A2MN-06A-11R-A18S-07	SKCM	tumor	TCGA-EE-A2MN-06	58	MALE
TCGA-EY-A5W2-01A-11R-A31O-07	UCEC	tumor	TCGA-EY-A5W2-01	72	FEMALE
TCGA-A7-A5ZW-01A-12R-A29R-07	BRCA	tumor	TCGA-A7-A5ZW-01	47	FEMALE
TCGA-S9-A6TV-01A-12R-A34R-07	LGG	tumor	TCGA-S9-A6TV-01	50	MALE
TCGA-4Z-AA7M-01A-11R-A39I-07	BLCA	tumor	TCGA-4Z-AA7M-01	65	MALE
TCGA-QH-A6CW-01A-11R-A32Q-07	LGG	tumor	TCGA-QH-A6CW-01	43	MALE
TCGA-VS-A9UZ-01A-11R-A42T-07	CESC	tumor	TCGA-VS-A9UZ-01	61	FEMALE
TCGA-60-2710-01A-01R-0851-07	LUSC	tumor	TCGA-60-2710-01	67	FEMALE
TCGA-AX-A2HA-01A-12R-A18M-07	UCEC	tumor	TCGA-AX-A2HA-01	35	FEMALE
TCGA-D7-A4YY-01A-11R-A251-31	STAD	tumor	TCGA-D7-A4YY-01	61.02	MALE
TCGA-DB-A75K-01A-11R-A32Q-07	LGG	tumor	TCGA-DB-A75K-01	55	FEMALE
TCGA-BH-A204-01A-11R-A157-07	BRCA	tumor	TCGA-BH-A204-01	80	FEMALE
TCGA-DD-AADA-01A-11R-A41C-07	LIHC	tumor	TCGA-DD-AADA-01	66	FEMALE
TCGA-CN-4736-01A-01R-1436-07	HNSC	tumor	TCGA-CN-4736-01	70	FEMALE
TCGA-ZF-A9R4-01A-11R-A38B-07	BLCA	tumor	TCGA-ZF-A9R4-01	83	MALE
TCGA-BJ-A45D-01A-11R-A23W-07	THCA	tumor	TCGA-BJ-A45D-01	36	MALE
TCGA-AR-A0TQ-01A-11R-A084-07	BRCA	tumor	TCGA-AR-A0TQ-01	27	FEMALE
TCGA-AX-A05Z-01A-11R-A00V-07	UCEC	tumor	TCGA-AX-A05Z-01	37	FEMALE
TCGA-D3-A3C1-06A-12R-A18S-07	SKCM	tumor	TCGA-D3-A3C1-06	1	MALE
TCGA-A2-A0CM-01A-31R-A034-07	BRCA	tumor	TCGA-A2-A0CM-01	40	FEMALE
TCGA-MH-A857-01A-11R-A355-07	KIRP	tumor	TCGA-MH-A857-01	63	MALE
TCGA-CJ-5680-01A-11R-1541-07	KIRC	tumor	TCGA-CJ-5680-01	65	FEMALE
TCGA-A7-A2KD-01A-31R-A21T-07	BRCA	tumor	TCGA-A7-A2KD-01	53	FEMALE
TCGA-EJ-7781-01A-11R-2118-07	PRAD	tumor	TCGA-EJ-7781-01	65	MALE
TCGA-AP-A0LO-01A-11R-A040-07	UCEC	tumor	TCGA-AP-A0LO-01	45	FEMALE
TCGA-75-5125-01A-01R-1755-07	LUAD	tumor	TCGA-75-5125-01	1	MALE
TCGA-78-7537-01A-11R-2066-07	LUAD	tumor	TCGA-78-7537-01	72	MALE
TCGA-D1-A1O0-01A-11R-A17B-07	UCEC	tumor	TCGA-D1-A1O0-01	77	FEMALE
TCGA-06-0882-01A-01R-1849-01	GBM	tumor	TCGA-06-0882-01	30	MALE
TCGA-AP-A0LJ-01A-11R-A040-07	UCEC	tumor	TCGA-AP-A0LJ-01	42	FEMALE
TCGA-BR-4279-01A-01R-1131-13	STAD	tumor	TCGA-BR-4279-01	43.98	MALE
TCGA-AB-2915-03A-01T-0740-13	LAML	tumor	TCGA-AB-2915-03	73	FEMALE
TCGA-AG-3612-01A-01R-0826-07	COREAD	tumor	TCGA-AG-3612-01	55	FEMALE
TCGA-69-7980-01A-11R-2187-07	LUAD	tumor	TCGA-69-7980-01	70	FEMALE
TCGA-DM-A1D4-01A-21R-A155-07	COREAD	tumor	TCGA-DM-A1D4-01	80	MALE
TCGA-WX-AA44-01A-11R-A39D-07	LIHC	tumor	TCGA-WX-AA44-01	64	FEMALE
TCGA-AG-A00C-01A-01R-A002-07	COREAD	tumor	TCGA-AG-A00C-01	49	FEMALE
TCGA-A6-6781-01A-22R-A278-07	COREAD	tumor	TCGA-A6-6781-01	43	MALE
TCGA-OL-A5RU-01A-11R-A28M-07	BRCA	tumor	TCGA-OL-A5RU-01	63	FEMALE
TCGA-15-0742-01A-01R-1850-01	GBM	tumor	TCGA-15-0742-01	65	MALE
TCGA-26-1442-01A-01R-1850-01	GBM	tumor	TCGA-26-1442-01	43	MALE
TCGA-23-1119-01A-02R-1565-13	OV	tumor	TCGA-23-1119-01	64	FEMALE
TCGA-AC-A3EH-01A-22R-A22K-07	BRCA	tumor	TCGA-AC-A3EH-01	79	FEMALE
TCGA-CE-A481-01A-21R-A23W-07	THCA	tumor	TCGA-CE-A481-01	41	FEMALE
TCGA-EE-A2MP-06A-11R-A18S-07	SKCM	tumor	TCGA-EE-A2MP-06	34	FEMALE
TCGA-FY-A3NP-01A-11R-A21D-07	THCA	tumor	TCGA-FY-A3NP-01	69	MALE
TCGA-B5-A1MS-01B-11R-A22K-07	UCEC	tumor	TCGA-B5-A1MS-01	60	FEMALE
TCGA-AB-2972-03A-01T-0734-13	LAML	tumor	TCGA-AB-2972-03	82	FEMALE
TCGA-PA-A5YG-01A-11R-A29S-07	ACC	tumor	TCGA-PA-A5YG-01	51	MALE
TCGA-C5-A3HD-01B-11R-A213-07	CESC	tumor	TCGA-C5-A3HD-01	51	FEMALE
TCGA-A5-A0GW-01A-11R-A16W-07	UCEC	tumor	TCGA-A5-A0GW-01	46	FEMALE
TCGA-B2-5639-01A-01R-1541-07	KIRC	tumor	TCGA-B2-5639-01	46	MALE
TCGA-AA-A01Z-01A-11R-A083-07	COREAD	tumor	TCGA-AA-A01Z-01	68	MALE
TCGA-E9-A6HE-01A-11R-A31O-07	BRCA	tumor	TCGA-E9-A6HE-01	45	FEMALE
TCGA-BP-4972-01A-01R-1334-07	KIRC	tumor	TCGA-BP-4972-01	43	FEMALE
TCGA-DU-6400-01A-12R-1708-07	LGG	tumor	TCGA-DU-6400-01	66	FEMALE
TCGA-UY-A8OD-01A-11R-A36F-07	BLCA	tumor	TCGA-UY-A8OD-01	68	FEMALE
TCGA-G4-6294-01A-11R-1774-07	COREAD	tumor	TCGA-G4-6294-01	75	MALE
TCGA-CX-7219-01A-11R-2016-07	HNSC	tumor	TCGA-CX-7219-01	47	MALE
TCGA-DD-AACT-01A-11R-A41C-07	LIHC	tumor	TCGA-DD-AACT-01	69	FEMALE
TCGA-HC-A8CY-01A-11R-A36G-07	PRAD	tumor	TCGA-HC-A8CY-01	63	MALE
TCGA-BP-4991-01A-01R-1334-07	KIRC	tumor	TCGA-BP-4991-01	54	MALE
TCGA-DJ-A13O-01A-11R-A10U-07	THCA	tumor	TCGA-DJ-A13O-01	56	MALE
TCGA-EB-A1NK-01A-11R-A18T-07	SKCM	tumor	TCGA-EB-A1NK-01	48	MALE
TCGA-C5-A1BL-01A-11R-A13Y-07	CESC	tumor	TCGA-C5-A1BL-01	32	FEMALE
TCGA-AP-A0LI-01A-11R-A040-07	UCEC	tumor	TCGA-AP-A0LI-01	67	FEMALE
TCGA-B0-5092-01A-01R-1420-07	KIRC	tumor	TCGA-B0-5092-01	53	FEMALE
TCGA-DU-A6S7-01A-21R-A32Q-07	LGG	tumor	TCGA-DU-A6S7-01	27	FEMALE
TCGA-V1-A8MJ-01A-11R-A36G-07	PRAD	tumor	TCGA-V1-A8MJ-01	58	MALE
TCGA-EL-A4KD-01A-11R-A250-07	THCA	tumor	TCGA-EL-A4KD-01	41	MALE
TCGA-AG-3878-01A-02R-0905-07	COREAD	tumor	TCGA-AG-3878-01	64	MALE
TCGA-AA-A02Y-01A-43R-A32Y-07	COREAD	tumor	TCGA-AA-A02Y-01	73	MALE
TCGA-MI-A75E-01A-11R-A32O-07	LIHC	tumor	TCGA-MI-A75E-01	61	MALE
TCGA-A8-A09B-01A-11R-A00Z-07	BRCA	tumor	TCGA-A8-A09B-01	58	FEMALE
TCGA-OL-A6VR-01A-32R-A33J-07	BRCA	tumor	TCGA-OL-A6VR-01	48	FEMALE
TCGA-BK-A4ZD-01A-11R-A27V-07	UCEC	tumor	TCGA-BK-A4ZD-01	42	FEMALE
TCGA-55-7283-01A-11R-2039-07	LUAD	tumor	TCGA-55-7283-01	76	FEMALE
TCGA-FI-A2D5-01A-11R-A17B-07	UCEC	tumor	TCGA-FI-A2D5-01	56	FEMALE
TCGA-J4-A67K-01A-21R-A30B-07	PRAD	tumor	TCGA-J4-A67K-01	68	MALE
TCGA-ET-A3DV-01A-12R-A206-07	THCA	tumor	TCGA-ET-A3DV-01	68	FEMALE
TCGA-DU-8164-01A-11R-2256-07	LGG	tumor	TCGA-DU-8164-01	51	MALE
TCGA-HT-7695-01A-11R-2256-07	LGG	tumor	TCGA-HT-7695-01	29	FEMALE
TCGA-F1-A72C-01A-21R-A33Y-31	STAD	tumor	TCGA-F1-A72C-01	68	MALE
TCGA-M7-A724-01A-12R-A32O-07	PRAD	tumor	TCGA-M7-A724-01	64	MALE
TCGA-BP-5175-01A-01R-1426-07	KIRC	tumor	TCGA-BP-5175-01	60	MALE
TCGA-BG-A0M2-01A-11R-A104-07	UCEC	tumor	TCGA-BG-A0M2-01	62	FEMALE
TCGA-B8-5552-01B-11R-1672-07	KIRC	tumor	TCGA-B8-5552-01	41	FEMALE
TCGA-BJ-A290-01A-11R-A180-07	THCA	tumor	TCGA-BJ-A290-01	70	MALE
TCGA-CF-A9FH-01A-11R-A38B-07	BLCA	tumor	TCGA-CF-A9FH-01	85	MALE
TCGA-13-1408-01A-01R-1565-13	OV	tumor	TCGA-13-1408-01	59	FEMALE
TCGA-CJ-4920-01A-01R-1426-07	KIRC	tumor	TCGA-CJ-4920-01	64	FEMALE
TCGA-62-A46O-01A-11R-A24H-07	LUAD	tumor	TCGA-62-A46O-01	65	FEMALE
TCGA-AA-A00N-01A-02R-A00A-07	COREAD	tumor	TCGA-AA-A00N-01	75	MALE
TCGA-J4-A67T-01A-11R-A311-07	PRAD	tumor	TCGA-J4-A67T-01	63	MALE
TCGA-BS-A0V7-01A-21R-A118-07	UCEC	tumor	TCGA-BS-A0V7-01	48	FEMALE
TCGA-AB-2964-03A-01T-0734-13	LAML	tumor	TCGA-AB-2964-03	58	FEMALE
TCGA-BB-A5HZ-01A-21R-A28V-07	HNSC	tumor	TCGA-BB-A5HZ-01	65	MALE
TCGA-AC-A3OD-01B-06R-A22O-07	BRCA	tumor	TCGA-AC-A3OD-01	68	FEMALE
TCGA-HC-8256-01A-11R-2263-07	PRAD	tumor	TCGA-HC-8256-01	53	MALE
TCGA-AZ-4681-01A-01R-1410-07	COREAD	tumor	TCGA-AZ-4681-01	79	FEMALE
TCGA-A4-8515-01A-11R-2404-07	KIRP	tumor	TCGA-A4-8515-01	47	MALE
TCGA-DR-A0ZL-01A-11R-A10U-07	CESC	tumor	TCGA-DR-A0ZL-01	53	FEMALE
TCGA-BF-A5EQ-01A-21R-A27Q-07	SKCM	tumor	TCGA-BF-A5EQ-01	63	MALE
TCGA-75-5147-01A-01R-1628-07	LUAD	tumor	TCGA-75-5147-01	1	FEMALE
TCGA-DD-AACJ-01A-11R-A41C-07	LIHC	tumor	TCGA-DD-AACJ-01	75	MALE
TCGA-AJ-A3BF-01A-11R-A213-07	UCEC	tumor	TCGA-AJ-A3BF-01	65	FEMALE
TCGA-HE-A5NL-01A-11R-A26U-07	KIRP	tumor	TCGA-HE-A5NL-01	51	MALE
TCGA-G4-6306-01A-11R-1774-07	COREAD	tumor	TCGA-G4-6306-01	71	MALE
TCGA-DU-6397-01A-11R-1708-07	LGG	tumor	TCGA-DU-6397-01	45	MALE
TCGA-CR-7399-01A-11R-2016-07	HNSC	tumor	TCGA-CR-7399-01	60	FEMALE
TCGA-EU-5907-01A-11R-1672-07	KIRC	tumor	TCGA-EU-5907-01	81	MALE
TCGA-RY-A847-01A-11R-A36H-07	LGG	tumor	TCGA-RY-A847-01	45	MALE
TCGA-43-6143-01A-11R-1820-07	LUSC	tumor	TCGA-43-6143-01	70	MALE
TCGA-BT-A20N-01A-11R-A14Y-07	BLCA	tumor	TCGA-BT-A20N-01	72	MALE
TCGA-TM-A84B-01A-11R-A36H-07	LGG	tumor	TCGA-TM-A84B-01	40	MALE
TCGA-E2-A1B5-01A-21R-A12P-07	BRCA	tumor	TCGA-E2-A1B5-01	46	FEMALE
TCGA-EY-A1GU-01A-11R-A13S-07	UCEC	tumor	TCGA-EY-A1GU-01	66	FEMALE
TCGA-J4-8198-01A-11R-2263-07	PRAD	tumor	TCGA-J4-8198-01	49	MALE
TCGA-E9-A1NE-01A-21R-A14M-07	BRCA	tumor	TCGA-E9-A1NE-01	28	FEMALE
TCGA-BC-A10Z-01A-11R-A131-07	LIHC	tumor	TCGA-BC-A10Z-01	62	FEMALE
TCGA-44-7669-01A-21R-2066-07	LUAD	tumor	TCGA-44-7669-01	59	MALE
TCGA-ZJ-AAXD-01A-21R-A42T-07	CESC	tumor	TCGA-ZJ-AAXD-01	35	FEMALE
TCGA-A2-A25F-01A-11R-A169-07	BRCA	tumor	TCGA-A2-A25F-01	66	FEMALE
TCGA-A6-A566-01A-11R-A28H-07	COREAD	tumor	TCGA-A6-A566-01	55	FEMALE
TCGA-FD-A6TB-01A-12R-A33J-07	BLCA	tumor	TCGA-FD-A6TB-01	82	MALE
TCGA-TQ-A7RN-01A-11R-A33Z-07	LGG	tumor	TCGA-TQ-A7RN-01	32	MALE
TCGA-MP-A4T8-01A-11R-A24X-07	LUAD	tumor	TCGA-MP-A4T8-01	68	MALE
TCGA-EJ-8469-01A-11R-2403-07	PRAD	tumor	TCGA-EJ-8469-01	46	MALE
TCGA-D8-A140-01A-11R-A115-07	BRCA	tumor	TCGA-D8-A140-01	62	FEMALE
TCGA-EJ-7315-01A-31R-2118-07	PRAD	tumor	TCGA-EJ-7315-01	68	MALE
TCGA-IN-A7NR-01A-11R-A354-31	STAD	tumor	TCGA-IN-A7NR-01	64	FEMALE
TCGA-BP-5195-01A-02R-1426-07	KIRC	tumor	TCGA-BP-5195-01	75	MALE
TCGA-EE-A17Y-06A-11R-A18T-07	SKCM	tumor	TCGA-EE-A17Y-06	69	MALE
TCGA-A4-8098-01A-11R-2404-07	KIRP	tumor	TCGA-A4-8098-01	73	MALE
TCGA-RC-A6M4-01A-11R-A32O-07	LIHC	tumor	TCGA-RC-A6M4-01	74	FEMALE
TCGA-DY-A1H8-01A-21R-A155-07	COREAD	tumor	TCGA-DY-A1H8-01	77	FEMALE
TCGA-DC-4745-01A-01R-A32Z-07	COREAD	tumor	TCGA-DC-4745-01	49	FEMALE
TCGA-C5-A1BI-01B-11R-A13Y-07	CESC	tumor	TCGA-C5-A1BI-01	31	FEMALE
TCGA-BR-8680-01A-11R-2402-13	STAD	tumor	TCGA-BR-8680-01	45.55	MALE
TCGA-G4-6625-01A-21R-1774-07	COREAD	tumor	TCGA-G4-6625-01	77	FEMALE
TCGA-FA-A6HO-01A-11R-A31O-07	DLBC	tumor	TCGA-FA-A6HO-01	58	FEMALE
TCGA-EE-A185-06A-11R-A18S-07	SKCM	tumor	TCGA-EE-A185-06	55	FEMALE
TCGA-DD-AACF-01A-11R-A41C-07	LIHC	tumor	TCGA-DD-AACF-01	68	MALE
TCGA-34-5231-01A-21R-1820-07	LUSC	tumor	TCGA-34-5231-01	72	MALE
TCGA-DH-A7UT-01A-12R-A34F-07	LGG	tumor	TCGA-DH-A7UT-01	30	MALE
TCGA-B5-A0K9-01A-21R-A104-07	UCEC	tumor	TCGA-B5-A0K9-01	88	FEMALE
TCGA-ET-A25R-01A-11R-A16R-07	THCA	tumor	TCGA-ET-A25R-01	51	FEMALE
TCGA-55-6986-01A-11R-1949-07	LUAD	tumor	TCGA-55-6986-01	74	FEMALE
TCGA-B9-4617-01A-01R-1193-07	KIRP	tumor	TCGA-B9-4617-01	41	MALE
TCGA-CC-A5UD-01A-11R-A28V-07	LIHC	tumor	TCGA-CC-A5UD-01	45	MALE
TCGA-CW-5591-01A-01R-1541-07	KIRC	tumor	TCGA-CW-5591-01	56	MALE
TCGA-EL-A3CS-01A-21R-A19O-07	THCA	tumor	TCGA-EL-A3CS-01	62	FEMALE
TCGA-55-8512-01A-11R-2403-07	LUAD	tumor	TCGA-55-8512-01	41	MALE
TCGA-CN-4723-01A-01R-1436-07	HNSC	tumor	TCGA-CN-4723-01	67	MALE
TCGA-64-1676-01A-01R-0946-07	LUAD	tumor	TCGA-64-1676-01	58	MALE
TCGA-DU-A6S2-01A-21R-A32Q-07	LGG	tumor	TCGA-DU-A6S2-01	37	FEMALE
TCGA-VQ-A91N-01A-11R-A414-31	STAD	tumor	TCGA-VQ-A91N-01	59	FEMALE
TCGA-AX-A1C8-01A-11R-A137-07	UCEC	tumor	TCGA-AX-A1C8-01	77	FEMALE
TCGA-DJ-A3VD-01A-11R-A23N-07	THCA	tumor	TCGA-DJ-A3VD-01	32	FEMALE
TCGA-A8-A08J-01A-11R-A00Z-07	BRCA	tumor	TCGA-A8-A08J-01	52	FEMALE
TCGA-TM-A7C4-01A-11R-A32Q-07	LGG	tumor	TCGA-TM-A7C4-01	39	FEMALE
TCGA-B4-5844-01A-11R-1672-07	KIRC	tumor	TCGA-B4-5844-01	61	FEMALE
TCGA-06-0156-01A-02R-1849-01	GBM	tumor	TCGA-06-0156-01	57	MALE
TCGA-BS-A0TE-01A-11R-A104-07	UCEC	tumor	TCGA-BS-A0TE-01	35	FEMALE
TCGA-QG-A5Z1-01A-11R-A28H-07	COREAD	tumor	TCGA-QG-A5Z1-01	71	MALE
TCGA-EL-A4K7-01A-11R-A250-07	THCA	tumor	TCGA-EL-A4K7-01	74	MALE
TCGA-F4-6459-01A-11R-1774-07	COREAD	tumor	TCGA-F4-6459-01	61	FEMALE
TCGA-BQ-7062-01A-11R-1965-07	KIRP	tumor	TCGA-BQ-7062-01	64	MALE
TCGA-YL-A8SA-01A-21R-A37L-07	PRAD	tumor	TCGA-YL-A8SA-01	69	MALE
TCGA-KN-8433-01A-11R-2315-07	KICH	tumor	TCGA-KN-8433-01	46	FEMALE
TCGA-KS-A41I-01A-11R-A23N-07	THCA	tumor	TCGA-KS-A41I-01	47	FEMALE
TCGA-69-7763-01A-11R-2170-07	LUAD	tumor	TCGA-69-7763-01	69	MALE
TCGA-DA-A1I1-06A-12R-A18U-07	SKCM	tumor	TCGA-DA-A1I1-06	55	MALE
TCGA-CV-5436-01A-01R-1514-07	HNSC	tumor	TCGA-CV-5436-01	65	MALE
TCGA-D6-6517-01A-11R-1873-07	HNSC	tumor	TCGA-D6-6517-01	59	MALE
TCGA-K7-A5RG-01A-11R-A28V-07	LIHC	tumor	TCGA-K7-A5RG-01	66	MALE
TCGA-CD-A486-01A-11R-A24K-31	STAD	tumor	TCGA-CD-A486-01	68.12	MALE
TCGA-73-A9RS-01A-11R-A41B-07	LUAD	tumor	TCGA-73-A9RS-01	41	MALE
TCGA-BH-A0BJ-01A-11R-A056-07	BRCA	tumor	TCGA-BH-A0BJ-01	41	FEMALE
TCGA-CV-7250-01A-11R-2016-07	HNSC	tumor	TCGA-CV-7250-01	64	MALE
TCGA-HC-A6AO-01A-11R-A30B-07	PRAD	tumor	TCGA-HC-A6AO-01	52	MALE
TCGA-24-1564-01A-01R-1566-13	OV	tumor	TCGA-24-1564-01	67	FEMALE
TCGA-BP-4994-01A-01R-1334-07	KIRC	tumor	TCGA-BP-4994-01	54	MALE
TCGA-AO-A0J6-01A-11R-A034-07	BRCA	tumor	TCGA-AO-A0J6-01	61	FEMALE
TCGA-EY-A1G7-01A-11R-A13S-07	UCEC	tumor	TCGA-EY-A1G7-01	86	FEMALE
TCGA-EK-A2RC-01A-11R-A18M-07	CESC	tumor	TCGA-EK-A2RC-01	33	FEMALE
TCGA-A3-A8OU-01A-11R-A37O-07	KIRC	tumor	TCGA-A3-A8OU-01	74	FEMALE
TCGA-CQ-A4CG-01A-11R-A266-07	HNSC	tumor	TCGA-CQ-A4CG-01	78	FEMALE
TCGA-VP-A878-01A-31R-A352-07	PRAD	tumor	TCGA-VP-A878-01	58	MALE
TCGA-AG-3896-01A-01R-1119-07	COREAD	tumor	TCGA-AG-3896-01	85	FEMALE
TCGA-A1-A0SE-01A-11R-A084-07	BRCA	tumor	TCGA-A1-A0SE-01	56	FEMALE
TCGA-KK-A59X-01A-11R-A29R-07	PRAD	tumor	TCGA-KK-A59X-01	55	MALE
TCGA-DJ-A2QC-01A-11R-A18C-07	THCA	tumor	TCGA-DJ-A2QC-01	70	FEMALE
TCGA-2Z-A9JT-01A-11R-A42S-07	KIRP	tumor	TCGA-2Z-A9JT-01	71	MALE
TCGA-A2-A04U-01A-11R-A115-07	BRCA	tumor	TCGA-A2-A04U-01	47	FEMALE
TCGA-HU-A4G6-01A-11R-A24K-31	STAD	tumor	TCGA-HU-A4G6-01	74.49	MALE
TCGA-AX-A063-01A-11R-A00V-07	UCEC	tumor	TCGA-AX-A063-01	63	FEMALE
TCGA-OY-A56Q-01A-11R-A406-31	OV	tumor	TCGA-OY-A56Q-01	78	FEMALE
TCGA-CV-A6JZ-01A-11R-A31N-07	HNSC	tumor	TCGA-CV-A6JZ-01	68	MALE
TCGA-AZ-6603-01A-11R-1839-07	COREAD	tumor	TCGA-AZ-6603-01	77	FEMALE
TCGA-BR-8059-01A-11R-2343-13	STAD	tumor	TCGA-BR-8059-01	72.48	MALE
TCGA-62-A46V-01A-11R-A24H-07	LUAD	tumor	TCGA-62-A46V-01	78	FEMALE
TCGA-HD-A6I0-01A-11R-A31N-07	HNSC	tumor	TCGA-HD-A6I0-01	56	MALE
TCGA-FE-A238-01A-11R-A16R-07	THCA	tumor	TCGA-FE-A238-01	36	FEMALE
TCGA-GD-A3OS-01A-12R-A220-07	BLCA	tumor	TCGA-GD-A3OS-01	54	FEMALE
TCGA-ET-A25L-01A-11R-A16R-07	THCA	tumor	TCGA-ET-A25L-01	52	FEMALE
TCGA-VQ-A91X-01A-12R-A414-31	STAD	tumor	TCGA-VQ-A91X-01	74	MALE
TCGA-N9-A4PZ-01A-22R-A28V-07	UCS	tumor	TCGA-N9-A4PZ-01	77	FEMALE
TCGA-BH-A0BZ-01A-31R-A12P-07	BRCA	tumor	TCGA-BH-A0BZ-01	59	FEMALE
TCGA-A8-A09X-01A-11R-A00Z-07	BRCA	tumor	TCGA-A8-A09X-01	62	FEMALE
TCGA-EW-A1IY-01A-11R-A13Q-07	BRCA	tumor	TCGA-EW-A1IY-01	38	FEMALE
TCGA-AA-3984-01A-02R-1022-07	COREAD	tumor	TCGA-AA-3984-01	61	FEMALE
TCGA-MI-A75I-01A-11R-A32O-07	LIHC	tumor	TCGA-MI-A75I-01	61	MALE
TCGA-KK-A6E8-01A-11R-A31N-07	PRAD	tumor	TCGA-KK-A6E8-01	68	MALE
TCGA-FS-A1ZJ-06A-12R-A18S-07	SKCM	tumor	TCGA-FS-A1ZJ-06	75	FEMALE
TCGA-09-2053-01C-01R-1568-13	OV	tumor	TCGA-09-2053-01	72	FEMALE
TCGA-22-5472-01A-01R-1635-07	LUSC	tumor	TCGA-22-5472-01	67	MALE
TCGA-AZ-4614-01A-01R-1410-07	COREAD	tumor	TCGA-AZ-4614-01	71	FEMALE
TCGA-AX-A0IU-01A-11R-A16W-07	UCEC	tumor	TCGA-AX-A0IU-01	79	FEMALE
TCGA-DU-7299-01A-21R-2027-07	LGG	tumor	TCGA-DU-7299-01	33	MALE
TCGA-A8-A08G-01A-11R-A00Z-07	BRCA	tumor	TCGA-A8-A08G-01	41	FEMALE
TCGA-RD-A7C1-01A-11R-A32D-31	STAD	tumor	TCGA-RD-A7C1-01	82	MALE
TCGA-E1-A7YU-01A-11R-A34R-07	LGG	tumor	TCGA-E1-A7YU-01	42	MALE
TCGA-77-8143-01A-11R-2247-07	LUSC	tumor	TCGA-77-8143-01	76	MALE
TCGA-MA-AA3Y-01A-11R-A38B-07	CESC	tumor	TCGA-MA-AA3Y-01	48	FEMALE
TCGA-AR-A252-01A-11R-A169-07	BRCA	tumor	TCGA-AR-A252-01	50	FEMALE
TCGA-A5-A0GG-01A-11R-A118-07	UCEC	tumor	TCGA-A5-A0GG-01	76	FEMALE
TCGA-DU-7292-01A-11R-2027-07	LGG	tumor	TCGA-DU-7292-01	69	MALE
TCGA-C5-A7CJ-01A-11R-A32P-07	CESC	tumor	TCGA-C5-A7CJ-01	42	FEMALE
TCGA-MH-A562-01A-11R-A26U-07	KIRP	tumor	TCGA-MH-A562-01	57	MALE
TCGA-D8-A27N-01A-11R-A16F-07	BRCA	tumor	TCGA-D8-A27N-01	36	FEMALE
TCGA-KK-A8IG-01A-11R-A36G-07	PRAD	tumor	TCGA-KK-A8IG-01	55	MALE
TCGA-30-1857-01A-02R-1569-13	OV	tumor	TCGA-30-1857-01	64	FEMALE
TCGA-EE-A3AD-06A-11R-A18S-07	SKCM	tumor	TCGA-EE-A3AD-06	50	MALE
TCGA-91-6829-01A-21R-1858-07	LUAD	tumor	TCGA-91-6829-01	78	MALE
TCGA-AN-A0FD-01A-11R-A034-07	BRCA	tumor	TCGA-AN-A0FD-01	71	FEMALE
TCGA-CQ-6222-01A-11R-1915-07	HNSC	tumor	TCGA-CQ-6222-01	63	MALE
TCGA-CN-4727-01A-01R-1436-07	HNSC	tumor	TCGA-CN-4727-01	56	MALE
TCGA-A7-A6VW-01A-21R-A33J-07	BRCA	tumor	TCGA-A7-A6VW-01	48	FEMALE
TCGA-CN-4729-01A-01R-1436-07	HNSC	tumor	TCGA-CN-4729-01	73	MALE
TCGA-D3-A8GP-06A-11R-A37K-07	SKCM	tumor	TCGA-D3-A8GP-06	77	MALE
TCGA-E8-A414-01A-11R-A23N-07	THCA	tumor	TCGA-E8-A414-01	45	FEMALE
TCGA-FG-A70Z-01A-12R-A33Z-07	LGG	tumor	TCGA-FG-A70Z-01	53	FEMALE
TCGA-IN-A6RS-01A-12R-A354-31	STAD	tumor	TCGA-IN-A6RS-01	76	MALE
TCGA-HT-7677-01A-11R-2256-07	LGG	tumor	TCGA-HT-7677-01	53	MALE
TCGA-EB-A5UM-01A-11R-A311-07	SKCM	tumor	TCGA-EB-A5UM-01	48	FEMALE
TCGA-YD-A9TA-06A-11R-A39D-07	SKCM	tumor	TCGA-YD-A9TA-06	75	MALE
TCGA-E2-A14S-01A-11R-A12D-07	BRCA	tumor	TCGA-E2-A14S-01	65	FEMALE
TCGA-10-0926-01A-01R-1564-13	OV	tumor	TCGA-10-0926-01	63	FEMALE
TCGA-CJ-4886-01A-01R-1305-07	KIRC	tumor	TCGA-CJ-4886-01	42	FEMALE
TCGA-AA-3511-01A-21R-1839-07	COREAD	tumor	TCGA-AA-3511-01	64	MALE
TCGA-ZJ-AAXT-01A-11R-A42T-07	CESC	tumor	TCGA-ZJ-AAXT-01	54	FEMALE
TCGA-N7-A59B-01A-11R-A28V-07	UCS	tumor	TCGA-N7-A59B-01	69	FEMALE
TCGA-BP-4340-01A-01R-1289-07	KIRC	tumor	TCGA-BP-4340-01	70	FEMALE
TCGA-DA-A1HY-06A-11R-A18T-07	SKCM	tumor	TCGA-DA-A1HY-06	42	MALE
TCGA-EL-A3ZO-01A-11R-A23N-07	THCA	tumor	TCGA-EL-A3ZO-01	79	FEMALE
TCGA-D3-A8GL-06A-11R-A37K-07	SKCM	tumor	TCGA-D3-A8GL-06	43	MALE
TCGA-29-1781-01A-01R-1567-13	OV	tumor	TCGA-29-1781-01	69	FEMALE
TCGA-G2-AA3C-01A-21R-A39I-07	BLCA	tumor	TCGA-G2-AA3C-01	66	MALE
TCGA-HC-A76W-01A-11R-A33R-07	PRAD	tumor	TCGA-HC-A76W-01	73	MALE
TCGA-BP-5192-01A-01R-1426-07	KIRC	tumor	TCGA-BP-5192-01	59	MALE
TCGA-26-5139-01A-01R-1850-01	GBM	tumor	TCGA-26-5139-01	65	FEMALE
TCGA-KK-A7AW-01A-11R-A32O-07	PRAD	tumor	TCGA-KK-A7AW-01	57	MALE
TCGA-G7-6796-01A-11R-1965-07	KIRP	tumor	TCGA-G7-6796-01	58	MALE
TCGA-CQ-5329-01A-01R-1686-07	HNSC	tumor	TCGA-CQ-5329-01	46	FEMALE
TCGA-B6-A400-01A-11R-A239-07	BRCA	tumor	TCGA-B6-A400-01	43	FEMALE
TCGA-5P-A9K0-01A-11R-A42S-07	KIRP	tumor	TCGA-5P-A9K0-01	75	MALE
TCGA-ET-A2MX-01A-11R-A23N-07	THCA	tumor	TCGA-ET-A2MX-01	27	MALE
TCGA-AX-A0IW-01A-11R-A040-07	UCEC	tumor	TCGA-AX-A0IW-01	67	FEMALE
TCGA-P5-A5EZ-01A-11R-A27Q-07	LGG	tumor	TCGA-P5-A5EZ-01	39	MALE
TCGA-BR-6454-01A-11R-1802-13	STAD	tumor	TCGA-BR-6454-01	58.87	MALE
TCGA-CG-5734-01A-11R-1602-13	STAD	tumor	TCGA-CG-5734-01	68.66	MALE
TCGA-04-1357-01A-01R-1565-13	OV	tumor	TCGA-04-1357-01	52	FEMALE
TCGA-13-1492-01A-01R-1565-13	OV	tumor	TCGA-13-1492-01	66	FEMALE
TCGA-G9-6339-01A-12R-A311-07	PRAD	tumor	TCGA-G9-6339-01	58	MALE
TCGA-DU-6396-01A-11R-1708-07	LGG	tumor	TCGA-DU-6396-01	31	FEMALE
TCGA-AO-A12H-01A-11R-A115-07	BRCA	tumor	TCGA-AO-A12H-01	69	FEMALE
TCGA-B9-A5W8-01A-11R-A28H-07	KIRP	tumor	TCGA-B9-A5W8-01	50	MALE
TCGA-D5-6922-01A-11R-1928-07	COREAD	tumor	TCGA-D5-6922-01	76	MALE
TCGA-QH-A65R-01A-21R-A31N-07	LGG	tumor	TCGA-QH-A65R-01	38	FEMALE
TCGA-4Z-AA83-01A-11R-A39I-07	BLCA	tumor	TCGA-4Z-AA83-01	52	MALE
TCGA-A5-A0R6-01A-11R-A104-07	UCEC	tumor	TCGA-A5-A0R6-01	64	FEMALE
TCGA-TQ-A7RQ-01A-11R-A33Z-07	LGG	tumor	TCGA-TQ-A7RQ-01	38	FEMALE
TCGA-ET-A2N4-01A-12R-A19O-07	THCA	tumor	TCGA-ET-A2N4-01	53	FEMALE
TCGA-DU-6392-01A-11R-1708-07	LGG	tumor	TCGA-DU-6392-01	35	FEMALE
TCGA-A2-A0CU-01A-12R-A034-07	BRCA	tumor	TCGA-A2-A0CU-01	73	FEMALE
[truncated: 8,007 more rows]

## Sheet: table 1C
Table S1D. Samples overlap across datasets
	cell_lines	cell_lines_in_expression	primary_tumors	primary_tumors_in_expression
RNA-seq	1362	1053	9250	9250
WES	1001	992	9140	7620
CNA	994	981	8178	7503
CpG islands methylation	1002	960	0	0
Drug response	990	984	0	0
Essentiality screening	216	151	0	0

## Sheet: table 1D
Table S1D. TCGA Study Abbreviations
TCGA.Study.Abbreviation	Study.Name
LAML	Acute Myeloid Leukemia
ACC	Adrenocortical carcinoma
BLCA	Bladder Urothelial Carcinoma
LGG	Brain Lower Grade Glioma
BRCA	Breast invasive carcinoma
CESC	Cervical squamous cell carcinoma and endocervical adenocarcinoma
CHOL	Cholangiocarcinoma
LCML	Chronic Myelogenous Leukemia
ESCA	Esophageal carcinoma
GBM	Glioblastoma multiforme
HNSC	Head and Neck squamous cell carcinoma
KICH	Kidney Chromophobe
KIRC	Kidney renal clear cell carcinoma
KIRP	Kidney renal papillary cell carcinoma
LIHC	Liver hepatocellular carcinoma
LUAD	Lung adenocarcinoma
LUSC	Lung squamous cell carcinoma
DLBC	Lymphoid Neoplasm Diffuse Large B-cell Lymphoma
MESO	Mesothelioma
OV	Ovarian serous cystadenocarcinoma
PAAD	Pancreatic adenocarcinoma
PCPG	Pheochromocytoma and Paraganglioma
PRAD	Prostate adenocarcinoma
SARC	Sarcoma
SKCM	Skin Cutaneous Melanoma
STAD	Stomach adenocarcinoma
THYM	Thymoma
THCA	Thyroid carcinoma
UCS	Uterine Carcinosarcoma
UCEC	Uterine Corpus Endometrial Carcinoma

## Sheet: table 1E
Table S1E. AR dependencies in Prostate cell lines
Cell line name	Androgen-responsive (Pubmedid:14518029)	Androgen-dependent (Pubmedid:14518029)	Metastatic site	Original publication
22RV1	Yes (weak)	No	Yes	10462204
DU-145	No	No	Yes	14518029
LNCaP-Clone-FGC	Yes	Yes	Yes	6831420
PC-3	No	No	Yes	14518029
PWR-1E	Yes (from original publication)	Yes (from original publication)	Non-neoplastic	8761420
VCaP	Yes	No	Yes	11317522
