# Supplementary material for: Transcription Factor Activities Enhance Markers of Drug Sensitivity in Cancer
Source: Oxford University Press journal article supplement (doi:10.1158/0008-5472.can-17-1679), 2017-12-11
Supplement: 00085472can171679-sup-184371_2_supp_4394326_kzgxjm.xlsx [file 00085472can171679-sup-184371_2_supp_4394326_kzgxjm.xlsx]

## Sheet: table3A
Table 3A. Sample-level activities in primary tumors
	TCGA-06-0675-11A-32R-A36H-07	TCGA-06-0678-11A-32R-A36H-07	TCGA-06-0680-11A-32R-A36H-07	TCGA-06-0681-11A-41R-A36H-07	TCGA-06-AABW-11A-31R-A36H-07	TCGA-22-4593-11A-01R-1820-07	TCGA-22-4609-11A-01R-2125-07	TCGA-22-5471-11A-01R-1635-07	TCGA-22-5472-11A-11R-1635-07	TCGA-22-5478-11A-11R-1635-07	TCGA-22-5481-11A-01R-1949-07	TCGA-22-5482-11A-01R-1635-07	TCGA-22-5483-11A-11R-1820-07	TCGA-22-5489-11A-01R-1635-07	TCGA-22-5491-11A-01R-1858-07	TCGA-33-4587-11A-01R-2125-07	TCGA-33-6737-11A-01R-1820-07	TCGA-34-7107-11A-01R-1949-07	TCGA-34-8454-11A-01R-2326-07	TCGA-38-4625-11A-01R-1758-07	TCGA-38-4626-11A-01R-1758-07	TCGA-38-4627-11A-01R-1758-07	TCGA-38-4632-11A-01R-1755-07	TCGA-39-5040-11A-01R-2125-07	TCGA-43-3394-11A-01R-1758-07	TCGA-43-5670-11A-01R-2125-07	TCGA-43-6143-11A-01R-1820-07	TCGA-43-6647-11A-01R-1820-07	TCGA-43-6771-11A-01R-1820-07	TCGA-43-6773-11A-01R-1949-07	TCGA-43-7657-11A-01R-2125-07	TCGA-43-7658-11A-01R-2125-07	TCGA-44-2655-11A-01R-1758-07	TCGA-44-2657-11A-01R-1758-07	TCGA-44-2661-11A-01R-1758-07	TCGA-44-2662-11A-01R-1758-07	TCGA-44-2665-11A-01R-1758-07	TCGA-44-2668-11A-01R-1758-07	TCGA-44-3396-11A-01R-1758-07	TCGA-44-3398-11B-01R-1758-07	TCGA-44-5645-11A-01R-1628-07	TCGA-44-6144-11A-01R-1755-07	TCGA-44-6145-11A-01R-1858-07	TCGA-44-6146-11A-01R-1858-07	TCGA-44-6147-11A-01R-1858-07	TCGA-44-6148-11A-01R-1858-07	TCGA-44-6776-11A-01R-1858-07	TCGA-44-6777-11A-01R-1858-07	TCGA-44-6778-11A-01R-1858-07
AHR	-0.242764	0.504393	-0.164528	-0.434058	-1.07878	1.97019	3.51037	2.62827	2.17361	2.39529	2.38587	2.2257	3.43259	2.31865	2.79841	1.56968	2.06939	2.6789	1.88852	1.72018	1.99476	0.932409	1.91615	1.04073	3.71531	1.17933	2.45401	2.87112	3.2115	1.5719	2.05548	1.52867	1.75749	0.877129	2.10235	2.30351	2.18523	3.6386	3.51228	1.95877	1.6419	2.8218	2.98715	2.70094	2.39388	1.6688	2.36645	2.41835	2.99975
AR	5.29223	6.02685	5.37188	3.46321	1.54628	8.36016	12.3523	8.83984	11.5558	9.93058	5.51781	10.9717	11.052	7.98592	7.89469	1.14256	12.1282	10.7438	9.48174	3.83707	2.71133	4.45147	3.42524	4.75418	11.3869	10.5476	7.38717	10.6437	10.4093	10.2268	9.95089	6.44346	9.60718	2.69288	9.01519	10.4434	10.1735	7.65564	12.1641	8.57717	5.50067	7.82451	9.40098	11.6724	12.4698	10.3	11.959	8.06769	10.6813
ARNT	1.30876	1.51222	1.25087	1.03566	-0.0894456	1.26689	2.03086	0.929769	1.26375	1.59396	0.979011	0.662761	1.01333	0.742997	1.45781	0.110133	1.0854	1.55932	0.917623	0.206323	0.309107	-0.25665	0.442266	0.477093	2.77939	0.610996	1.85311	1.97739	2.31646	0.882784	1.18255	0.951741	0.789187	1.30668	0.916823	1.37253	1.01276	1.66439	2.10759	1.48453	0.331521	1.52287	1.81887	1.63144	1.6437	0.853568	1.72773	1.26616	1.88348
ARNTL	0.745837	1.05827	0.548502	0.355539	0.723462	1.56488	3.40959	3.01995	1.91672	2.27647	2.89444	2.20552	4.09973	1.66352	1.78006	-0.249959	0.99139	1.44695	1.22388	1.58144	2.53886	0.814506	0.705768	2.58107	3.04173	2.95179	2.60542	3.77197	3.19519	2.34384	1.92423	2.34061	2.88175	0.336216	0.43048	3.52317	2.24194	1.9042	2.97839	1.37073	0.609973	2.58362	2.9743	3.31076	3.94552	1.65265	3.66005	0.892938	2.77393
ATF1	-0.116778	0.238331	-0.203632	-0.301003	-0.314203	-0.943734	-0.788355	-1.3329	-0.841217	-1.09067	-2.40034	-1.2685	-1.008	-1.19492	-2.08128	-1.526	-0.299993	-0.883401	-1.24253	-1.51933	-1.69934	-1.01607	-0.779733	-2.03882	-0.717473	-1.54828	-0.971497	-1.53773	-0.555677	-0.274535	-1.32751	-2.13264	-1.40484	-1.72823	-1.1855	-2.21872	-1.56848	-1.04286	-1.03397	-1.6255	-2.27443	-1.87527	-3.08874	-1.11532	-1.18634	-0.836904	-0.933804	-1.59969	-0.264065
ATF2	-0.879985	-0.781028	-0.915012	-0.754244	-1.0414	1.18807	1.5854	1.34076	0.135222	1.83586	0.218278	1.57358	0.858143	0.485725	0.974204	1.21309	1.83179	1.64429	0.739837	1.19301	0.978595	1.72035	1.0885	1.34835	1.32401	0.203786	0.17795	0.769181	0.841378	1.28617	0.593464	0.870935	1.21828	0.9589	0.688728	1.4404	0.662359	0.631246	1.08243	0.37898	0.149138	1.09039	0.516658	1.21018	0.63581	0.838771	1.55205	0.594258	1.98154
ATF3	-2.24881	-1.43946	-2.1506	-1.19135	0.482405	1.96451	1.11084	0.0870831	-1.55161	0.496063	1.28858	-0.17913	1.85287	-0.0412613	2.07159	1.66548	0.215734	0.970975	-0.299044	1.41094	1.84587	2.44449	2.27726	2.92803	0.0626049	-1.80037	0.422818	0.943731	1.88908	-1.04628	-0.705617	0.0543775	-0.380872	-0.0493836	0.370784	2.09243	1.15141	1.52602	-0.034809	-0.438033	0.1521	1.05255	0.550499	-0.569203	1.32238	-2.41686	-0.625612	-0.372369	0.523818
ATF4	0.301751	0.531166	0.2291	0.405285	-0.353608	-0.462289	-0.753075	-1.22362	-1.45517	-0.766741	-0.506556	-1.14628	-1.45952	-1.85294	-1.13248	-0.590385	-1.23266	-0.269268	-0.782356	-0.486721	-0.310294	-0.00496984	-0.554271	-0.0268588	-1.5232	-1.66696	-0.739877	-0.706135	-0.00548118	-0.989832	-1.58628	-0.71629	-1.16855	-0.942139	-1.3046	0.153096	-1.49732	-0.760298	-1.00228	-0.62428	-0.424592	-0.436356	-0.593308	-1.0971	0.560102	-1.71839	-1.48003	-1.09662	-0.443632
BACH1	1.57348	1.20282	1.01657	1.0178	0.0925928	0.99298	1.09164	0.797672	1.43299	0.728873	0.139076	1.0514	0.923157	0.477906	-0.603934	-0.859289	0.272537	1.71885	0.247782	-0.0307459	-0.502049	0.255213	0.895311	-1.01254	0.859958	0.679841	1.27761	0.912525	1.10299	0.674492	0.539117	0.545028	0.928777	0.546322	0.673832	0.26636	0.159412	0.698232	1.01435	0.329724	-0.461097	0.675351	0.456746	0.78147	1.34748	0.390648	0.473498	0.707938	0.677854
BATF	-0.140638	-0.145789	-0.302925	0.0432802	-0.220505	2.92854	2.16968	2.18403	2.49645	2.64658	1.99455	2.34193	2.27454	2.01715	1.58948	1.98608	2.15683	2.66341	2.61388	2.08979	2.3234	1.96041	2.82527	1.69996	2.10689	1.95666	2.73012	2.0252	2.33246	2.43481	2.20914	2.14688	1.46092	3.14112	2.28305	2.15447	1.97671	2.48015	2.27692	2.53419	2.15862	2.24604	1.97392	2.14186	1.69159	1.8522	1.15939	2.52664	2.54997
CDC5L	-0.125383	-0.0100803	-0.22504	-0.412707	0.935211	-0.591757	0.0547841	-0.550606	-0.747927	0.0558322	-0.477964	-0.36367	0.116015	-0.547532	-0.655219	-1.42222	-0.604872	-1.60611	-0.833574	-0.644562	-0.279137	-0.37486	0.254322	-0.578993	-0.465013	-0.717737	-1.39771	-0.0928154	-0.072176	-1.19257	-0.794187	-0.465423	-0.238953	-1.35355	-0.978516	-0.635357	-0.324156	0.464512	-0.457828	-1.13056	-0.400873	-0.212489	0.212675	0.461554	1.29114	-0.859921	-0.0094335	-1.37144	-0.000717484
CDX2	-0.0506721	-0.512164	-0.670761	-0.709101	-2.14809	1.11523	0.790099	1.48016	1.67523	0.902925	1.17385	0.818536	1.09046	0.169936	0.619223	0.811861	1.32014	0.828657	2.1679	0.824287	1.25123	1.11996	0.0990442	0.0149766	1.89481	1.6993	1.6114	0.970803	0.572375	1.04919	0.590182	0.940532	0.287262	0.585311	1.39392	0.652745	-0.231377	0.470237	1.36246	1.7238	0.445146	1.36789	1.00561	1.64596	0.771471	1.72818	0.509261	0.787038	0.44376
CEBPA	1.00121	1.01628	0.994795	1.31012	0.740796	1.92554	0.77571	0.312772	0.411578	0.983988	0.943892	1.15209	2.07298	1.0785	1.33423	0.937821	1.16006	1.72989	1.28296	1.32539	1.24848	0.637367	1.99544	1.18179	0.859702	0.435974	1.39517	0.126127	0.621089	1.4342	1.08833	0.151709	0.624858	2.04678	0.776071	0.9731	1.10771	1.10577	0.512664	0.68011	1.39604	1.23083	0.769663	0.556436	0.599249	1.14457	0.532744	1.58142	0.382452
CEBPB	0.204248	0.717729	0.0190411	0.935328	0.101648	2.87223	2.73973	2.10411	1.04002	2.58843	2.23465	2.18052	3.11785	2.7365	3.08216	2.2838	2.33132	3.02477	1.60656	2.64748	2.33069	2.51247	2.587	2.90468	2.66622	0.6619	2.62476	2.46885	3.04139	2.11977	1.98281	1.52304	2.08137	2.1707	1.43542	2.83546	1.95478	1.69665	1.96796	1.34717	1.09875	2.242	2.68307	2.16886	2.35988	0.807956	2.13048	1.53755	2.74048
CLOCK	0.29524	0.603315	0.110725	-0.222278	0.351658	1.52578	3.27601	3.15494	1.84944	2.37847	2.9732	2.09146	4.0153	1.7242	2.01654	8.11829e-05	0.897274	1.30412	1.26451	1.57771	2.38243	0.689989	0.894901	2.4095	3.0301	2.79061	2.58332	3.59148	2.91006	2.08307	2.02624	2.51669	2.89421	0.699781	0.695952	3.43588	2.16007	1.82048	2.88599	1.46638	0.882248	2.71809	2.87555	3.35539	3.59394	1.82261	3.68469	1.0315	2.61777
CREB1	2.20056	3.39426	2.16822	2.26309	1.01292	-0.95004	1.41995	-1.89215	-2.81259	-0.267481	-2.83574	-2.6721	-0.514424	-2.96777	-1.44491	-2.06746	-1.79664	-1.03995	-2.78242	-2.38906	-1.33154	-1.96708	-0.707151	0.900139	-0.443674	-2.12275	-1.9911	-1.26863	0.471357	-1.60618	-3.4706	-2.69666	-2.1516	-3.0382	-2.85692	-1.28646	-1.79661	-0.572548	-1.37765	-2.79505	-3.41137	-1.93912	-0.437222	-0.144277	1.7944	-2.41787	0.434046	-3.29239	1.53649
CTCF	-0.158587	0.73175	-0.246107	0.141035	0.820079	1.13843	1.49119	0.881642	1.33944	1.92201	1.44411	1.54791	0.797734	1.09058	1.05815	0.0469164	0.717897	0.807956	0.566085	0.607342	0.630509	-0.0616359	-0.0808539	0.458556	1.02105	0.476711	0.640163	1.95331	1.81769	1.15193	1.32821	1.2086	1.43271	1.45443	1.81774	1.34629	1.34208	1.49319	1.46454	0.480291	1.74987	1.44359	0.965074	1.24185	1.6065	0.26039	1.43734	0.607334	1.28641
E2F1	-10.5203	-10.7192	-10.555	-11.5935	-8.0213	-7.69388	-9.58109	-11.0419	-6.44415	-8.50616	-13.4463	-9.52251	-3.65898	-10.0658	-11.7619	-8.80005	-8.89075	-8.2226	-10.9847	-11.8236	-9.28975	-7.50122	-6.77905	-8.86856	-8.37631	-11.4878	-9.97166	-10.3913	-8.73967	-8.75965	-10.9672	-11.7548	-10.4472	-6.82275	-10.7361	-10.0984	-10.6496	-5.8834	-9.28543	-11.4082	-12.0244	-9.46215	-10.7344	-8.91881	-4.3151	-12.0042	-9.95673	-9.83012	-8.74322
E2F4	-11.3484	-11.7031	-11.2501	-12.4463	-8.86001	-11.1103	-13.1098	-14.4552	-9.30499	-11.2221	-16.8037	-12.878	-7.63089	-13.1613	-14.7377	-9.24586	-11.1136	-13.6898	-14.0495	-13.8112	-11.1754	-9.37867	-7.77954	-9.76074	-11.0242	-14.288	-14.5668	-14.3908	-13.1847	-12.6621	-14.1933	-13.004	-13.188	-9.36088	-13.2318	-14.7655	-14.613	-10.3898	-13.3978	-14.6547	-13.4976	-11.5077	-14.3375	-12.1251	-8.87237	-14.0789	-11.6378	-13.0538	-11.5618
E2F6	-0.250173	-0.649563	-0.526019	-1.45946	-1.18611	-1.22657	-0.870763	-1.49763	-0.261314	-0.545267	-1.90616	-0.985003	-1.2526	-1.67053	-2.42049	-0.782548	-0.718891	-2.30226	-2.70531	-1.09475	-0.726488	-0.711789	-0.132701	-1.16912	-0.582407	-0.822346	-1.7888	-0.961387	-1.00676	-1.89588	-1.15129	-1.93466	-1.5083	-1.94753	-2.19862	-2.54757	-2.01041	-1.4051	-1.21591	-1.25358	-2.36444	-0.799798	-1.21016	-1.07024	-1.0636	-1.08692	-0.62304	-1.7402	-0.649065
E2F7	-2.03784	-2.37075	-2.4132	-2.69463	-2.6903	-1.77519	-2.92972	-2.63544	-0.933889	-2.59454	-3.52251	-2.09081	-0.595694	-1.70994	-3.13458	-1.88337	-1.84619	-1.7689	-2.19566	-3.92627	-3.15391	-2.02924	-1.73922	-2.16837	-2.32239	-2.6701	-2.21085	-2.85612	-2.60894	-1.61535	-2.30563	-3.50327	-2.16489	-1.15223	-2.57341	-2.80179	-2.67335	-1.68926	-2.2016	-2.08345	-3.27672	-2.35501	-3.22704	-2.38195	-1.24484	-2.55946	-3.10459	-2.25634	-2.08807
EBF1	-1.08574	-1.15825	-1.22163	-0.957274	-1.14229	2.12371	1.23472	1.74995	1.21543	1.72579	2.23943	1.02767	2.26687	1.74206	2.15713	1.8795	0.607727	1.77273	1.09546	2.19366	2.50634	1.7019	1.99187	1.95434	1.01195	1.07776	2.43899	1.70358	2.1793	0.541062	1.52344	1.77646	1.44748	2.19298	1.90633	1.8272	2.08303	2.39741	1.49058	1.14361	1.78483	1.81186	2.49666	0.77776	1.28496	0.426131	1.16384	1.89112	1.20725
EGR1	-1.48065	-0.915983	-1.40034	-1.47306	-1.32403	1.10148	2.53212	1.75793	-0.121119	1.41862	1.00138	0.427529	2.4696	1.14779	0.962767	-1.50826	0.254166	2.01965	-0.150206	0.712739	1.08357	-0.81909	-0.432824	0.374502	2.02225	0.83359	0.892261	1.80552	2.67392	0.899484	-0.0257859	0.348881	1.16593	0.225575	-0.0360223	1.7249	1.40921	2.40284	0.840733	0.0161394	-0.127527	-0.188291	1.96065	1.15627	2.73007	-0.176462	0.925327	0.292363	1.51939
ELF1	-4.31055	-3.57448	-4.09951	-3.61347	-0.625712	-0.568892	-2.32522	-1.45573	-1.90321	-1.21016	-1.53872	-2.28219	-1.2788	-1.66176	-1.44055	-0.869659	-2.72818	-1.33017	-1.94761	0.110254	0.378244	-0.646624	0.243082	-1.02778	-2.33699	-2.9248	-0.976221	-1.72321	-1.62385	-2.92363	-1.84747	-1.64335	-1.65912	-1.13579	-1.16161	-1.65233	-0.693761	-0.478626	-2.2652	-2.48531	-1.74445	-0.455567	-2.10455	-2.53291	-2.74729	-3.18731	-2.63812	-1.57136	-2.74494
ELF5	-1.64403	-1.55529	-1.36129	-1.74782	-0.82613	0.272703	-0.953734	-1.05715	-0.775896	-0.523768	-1.12094	-0.951476	-0.357537	-0.670807	-0.0676979	-0.738012	-1.08536	-0.583964	-1.60224	-0.647737	-1.07607	-1.01644	-0.567667	-0.843036	-0.430569	-1.31102	-0.449922	-1.28924	-1.04884	-0.428378	-0.773023	-1.14458	-0.53183	0.0192397	-0.633615	-1.11693	-0.817293	-0.686023	-1.27211	-0.964056	-0.778873	-0.491013	-1.2081	-0.656453	-1.16275	-1.16099	-0.146923	-0.292444	-0.560735
ELK1	-4.90648	-4.74123	-4.97467	-4.49295	-3.938	-2.1393	-3.87692	-3.03466	-5.19514	-2.95687	-3.52546	-4.36794	-2.78011	-2.85257	-2.4275	-0.856445	-3.80829	-4.23491	-4.68933	-1.15925	-0.648165	-1.84263	-0.576993	-0.642772	-3.30316	-4.20736	-3.856	-3.84566	-2.3832	-4.89029	-4.42053	-2.79227	-3.55384	-2.52589	-3.88723	-3.57226	-3.18047	-1.93948	-4.13363	-4.41915	-3.48545	-2.40145	-3.17129	-3.90837	-2.37358	-4.52618	-2.76738	-3.73343	-3.05249
ELK4	-1.70491	-1.43119	-1.69636	-1.26276	-0.790011	0.279201	-0.791222	0.159717	-1.5902	-0.27588	-0.186804	-0.946785	0.444683	0.0234698	0.760964	0.297073	-0.636699	-0.386369	-1.37821	0.803516	0.232592	0.730606	0.137377	0.343331	-0.807489	-1.85093	0.0255252	-0.418984	-0.581572	-1.74286	-0.997151	-0.0924572	-0.350701	0.633037	-0.434467	0.235394	-0.0219451	-0.278981	-0.984433	-0.926015	-0.503704	-0.27444	-0.819181	-0.762299	-0.622579	-1.31321	-0.291812	-0.263695	-0.746735
ERG	-0.876171	-0.970374	-0.801791	-1.07353	-0.820047	1.22824	2.09349	1.65327	2.37427	2.12987	1.56432	2.69086	1.81587	1.94656	2.39868	1.09023	2.94055	2.24493	2.75063	1.27025	0.0798705	1.23026	0.557431	0.539473	2.01723	1.92914	2.02186	2.08712	1.77214	2.22869	2.40584	1.44283	2.85335	1.61862	2.19383	1.79163	2.33702	1.0035	2.47906	2.30978	2.54273	2.21445	1.19271	2.38532	0.927459	2.06505	1.83911	2.43844	2.16182
ESR1	-0.973243	-0.327513	-1.06792	-1.5529	-2.53198	1.90158	4.08126	3.88571	3.79559	3.69391	3.2424	3.86591	3.63064	3.0183	3.05723	-1.37724	3.14792	4.80349	4.08437	0.74118	0.301017	0.160383	-0.0073862	-0.668343	4.41737	2.34204	3.51455	4.24588	4.58136	2.91923	3.32983	1.67368	3.94858	2.38939	3.59879	4.49544	3.46124	3.31042	4.77607	3.1055	2.98169	3.26675	2.91965	4.08089	4.38512	2.73268	3.5119	3.03264	2.89497
ESR2	0.672821	1.11473	0.700278	0.36677	1.19962	0.302683	2.73179	2.50254	2.07132	2.86743	2.17341	2.60504	2.06771	1.9805	2.45674	-1.55973	1.25761	2.31841	1.78011	-0.22715	-0.70494	-1.72439	-1.57966	-1.2958	2.28333	1.97175	2.1157	2.91439	2.54343	2.04589	2.30072	1.32544	3.28134	1.38186	2.7137	3.14183	3.2414	2.269	2.98683	1.79478	1.87915	1.96379	2.10579	3.33968	2.48537	1.94196	2.44235	1.51008	1.6295
ETS1	-10.1824	-9.36995	-9.93164	-8.47518	-3.40778	-11.301	-17.5104	-16.8419	-20.3306	-14.26	-15.905	-19.6061	-14.8115	-15.8	-13.8407	-7.78823	-17.4514	-19.8942	-21.7481	-8.99778	-9.18485	-9.6533	-6.09124	-7.80526	-17.9012	-20.1778	-18.4125	-16.6216	-15.3321	-21.7391	-19.5245	-14.486	-16.5555	-14.7637	-18.3769	-19.198	-16.3479	-11.1861	-20.6255	-19.5156	-16.5796	-13.5352	-17.1292	-19.079	-15.8209	-21.9859	-16.4349	-17.3106	-18.2111
EWSR1-FLI1	1.2862	1.17507	1.24991	1.05129	0.456549	-0.963229	-0.184684	-0.848098	-0.354275	-0.749811	-1.33477	-0.0941136	0.172412	-1.32619	-1.39172	-0.336413	0.177034	0.378034	-0.636645	-0.853915	-1.0348	-0.595772	-0.274446	-0.793057	0.274097	-1.28602	-0.946197	-0.521631	-0.450992	-0.276442	-0.60662	-1.35612	-0.603328	-0.732418	-0.173953	-0.940456	-0.674739	-1.06932	-0.102937	-0.780913	-0.698846	-0.20148	-1.04256	-0.173952	0.168281	-0.649234	-0.0696124	-0.553279	0.219834
EZH2	-1.40212	-0.447111	-1.25973	-1.46547	-1.11372	0.468924	1.26059	1.17214	1.71238	1.3097	0.840209	1.44522	1.72098	1.30123	0.899583	0.141251	1.05574	1.28348	1.5576	-0.00126667	0.529084	0.127743	-0.193761	0.674722	1.23821	1.20724	1.11024	1.57551	1.57556	1.03033	1.1836	1.10997	1.53446	1.19406	1.60767	1.60083	0.99131	1.7218	1.68014	1.56682	1.09112	1.22954	0.875696	2.25162	2.14732	1.44809	0.911829	1.12694	1.23607
FLI1	-1.03243	-0.790816	-1.40119	-1.0699	-1.55333	5.07637	4.21806	3.88573	4.80641	5.07893	4.15395	5.09293	3.92798	4.58046	4.62673	4.20814	5.56615	4.95231	5.30037	4.10433	3.87539	4.7979	4.47877	4.41114	4.33055	4.02598	4.82715	4.84964	4.61116	4.75955	4.67899	3.62654	4.66264	5.24225	4.71623	4.24203	4.57425	4.36431	4.90138	4.73001	4.90321	4.5118	4.2064	4.72749	4.27885	3.64043	3.5427	4.96487	5.32881
FOS	-3.45058	-2.39486	-3.40418	-3.19864	-2.57608	-0.0156266	-1.08582	-1.36625	-0.978487	-1.13344	-1.53075	-0.846096	-0.0255037	-1.54394	-1.85302	-3.95219	-1.37439	-0.0470517	-1.70007	-2.46408	-1.33558	-1.99121	-1.40348	-2.38403	-0.809288	-1.68554	-1.29388	0.0421568	0.590278	-0.340873	-2.29337	-2.78398	-1.61123	-0.826438	-0.682853	-0.414751	-0.604595	0.689405	-0.413522	-2.07861	-1.91806	-1.47782	-1.81174	-1.48998	0.447771	-2.66398	-3.13657	-1.86254	-1.35562
FOSL2	-0.184795	-0.666922	-0.488463	-0.101589	-0.830881	-1.10665	-1.26021	0.313709	0.270734	-0.455892	-0.287529	-0.101018	-0.386652	0.463231	-0.440066	0.0492601	0.175134	-0.0736562	-0.273057	-0.313863	-0.189974	-0.502083	-0.25269	-0.866846	0.117955	0.237681	0.0976856	-0.589772	-1.35557	0.163272	-0.704028	-0.795635	0.305486	0.768703	0.196532	-0.561979	0.269273	-0.595606	0.151201	0.498324	0.441532	-1.27921	-0.208596	-0.200774	-0.0758536	0.501749	-0.532667	0.362602	-0.170145
FOXA1	-1.6454	-1.32893	-1.79527	-3.15755	-3.6856	4.2018	7.67519	7.01451	5.88619	7.26388	3.74759	5.74884	6.82989	5.22427	5.92171	-1.10632	6.37158	5.36499	4.87009	2.3432	0.666111	0.722989	1.74097	0.631128	6.71845	4.81349	4.79872	6.46982	6.34599	4.91291	4.82725	4.10609	6.1215	1.98072	5.79107	6.675	6.31981	4.45836	6.77494	5.12472	3.91215	4.14898	5.84036	8.18896	7.17626	6.14525	7.6107	4.73043	5.83458
FOXA2	-1.48351	-0.85339	-1.70507	-1.94225	-1.60614	2.05307	5.48929	5.24088	4.52294	4.3066	2.99223	3.89075	5.14051	3.63433	3.9072	-0.170192	3.92085	4.14924	3.49215	1.69223	0.963618	0.41224	0.41067	0.224959	5.10176	3.93548	4.35945	4.36431	3.84774	3.68369	3.51401	2.79539	3.23813	2.24225	3.49838	4.56087	4.25387	2.65124	3.89486	3.58483	2.04562	2.81802	4.12933	4.74265	3.81851	4.13731	5.14346	3.375	3.92196
FOXD1	0.233794	-0.157789	0.044056	-0.261235	0.0447377	0.0924867	0.655364	0.400214	0.602614	0.841116	0.169458	0.612401	0.745729	0.569955	0.458178	-0.327348	1.16404	0.1162	0.727918	-0.128507	-0.454369	0.298898	-0.0506463	-0.415464	1.15384	0.273615	-0.164151	0.651257	1.08023	0.840429	0.12394	0.258852	0.547439	-0.241316	0.633374	-0.170066	0.52216	0.535197	0.855446	0.472002	0.673617	0.469485	0.237752	0.985055	0.665291	0.639477	0.175665	0.282079	0.354015
FOXF2	1.00028	0.939043	1.21831	1.06148	0.0501828	2.63153	3.04122	2.77574	3.42394	2.73833	2.1469	3.06724	2.78593	2.21327	2.17476	1.29797	3.07287	3.3434	2.70479	1.76911	1.24097	1.6385	1.31457	1.20873	3.19615	2.74265	2.90632	2.84532	2.38514	2.63109	2.7085	2.12759	2.59371	2.10448	2.77615	2.32872	2.42344	2.20207	3.00027	3.00931	2.22699	2.42041	2.42824	3.35162	2.21661	2.75322	2.76382	2.76927	2.65656
FOXI1	0.586692	0.363038	0.693135	0.323715	-0.493561	1.09825	1.13333	0.958055	1.42857	1.36861	0.522481	1.20847	1.53025	1.04015	0.878693	-0.802742	1.69101	2.02663	1.27748	0.079841	-0.141308	-0.000553173	0.0197027	-0.297943	1.26825	0.715408	1.35618	1.32275	1.44709	1.04779	0.873168	-0.10437	0.882689	0.474388	0.945005	1.39144	0.948343	0.843023	1.46228	0.792868	0.276806	0.644452	0.816738	1.06202	1.3548	0.955834	0.777078	0.73339	1.0709
FOXM1	-8.49521	-9.47845	-8.86849	-10.364	-9.5283	-9.49286	-12.4821	-13.5575	-5.77338	-10.8984	-13.2453	-9.37641	-4.20067	-10.0519	-13.0363	-9.16723	-8.60638	-6.75256	-9.89555	-14.0384	-9.5023	-6.99088	-7.5411	-10.3189	-8.73612	-11.3899	-10.1446	-11.9259	-9.60555	-8.14382	-10.7896	-12.5168	-10.8343	-4.51529	-9.1043	-11.1406	-11.5871	-6.5	-9.66112	-11.0819	-12.4892	-9.45722	-11.7544	-11.1511	-5.1148	-12.2673	-12.5494	-9.034	-10.3798
FOXO3	-1.19899	-0.943759	-1.09157	-1.72064	-0.664311	0.432321	1.55981	0.124172	-0.278878	0.839305	0.606509	0.181474	0.560263	-0.180231	1.31106	0.742173	1.09621	-0.606213	0.133772	1.30563	1.4068	1.18421	1.16775	1.80252	1.06015	-0.0815813	-0.609532	0.445511	1.49361	-0.257662	0.202019	0.702663	0.679464	-0.135981	-0.0145053	0.322099	0.811295	1.25654	0.622694	0.176828	0.950341	1.19199	0.909859	0.622678	2.04217	0.464816	1.74505	0.489174	1.328
FOXP3	-6.27691	-6.57351	-6.25375	-7.01097	-3.89389	0.572748	1.63734	-0.525873	-0.663251	1.76918	-3.44434	-1.30564	0.256674	-2.42618	-1.16818	0.351334	2.21183	-0.806368	-0.473843	-0.550449	0.194959	-0.179002	3.76028	0.858552	0.496615	-0.839406	-0.982234	-1.72296	-1.52725	-0.680178	-1.13973	-0.255485	-1.97783	-0.946839	-1.53469	-1.95334	-2.0426	-0.890549	-0.623239	-2.05319	-1.85169	0.377846	-1.00375	1.36928	-0.725343	-1.10309	1.40174	-0.571518	2.20653
GABPA	-3.30324	-2.82596	-3.30346	-2.7718	-1.02779	-1.70309	-5.05037	-3.89673	-5.05105	-3.98932	-3.22107	-4.65629	-3.09002	-2.89599	-3.36894	-2.00543	-4.80407	-4.87001	-5.77649	-2.03425	-1.8226	-1.58587	-1.02944	-2.3925	-5.60889	-4.93732	-4.34717	-3.5041	-3.47423	-4.91251	-5.34303	-4.06162	-3.80867	-3.0549	-4.4855	-4.46296	-2.94335	-2.00411	-4.65307	-5.31058	-4.62433	-3.94197	-3.82364	-5.28802	-3.95078	-6.04647	-4.7992	-4.65378	-5.44678
GATA1	1.12916	1.83378	0.932825	1.04391	0.458482	8.25326	8.8226	8.88654	8.76153	8.84029	8.10887	9.13456	8.88128	8.15395	8.54865	1.6093	7.64707	10.2334	8.66844	5.69804	4.92158	3.87369	4.13852	2.73199	8.69376	7.34705	9.40613	9.96929	10.2487	8.71443	8.26495	6.93133	8.65179	7.93109	8.44713	10.0979	9.19033	9.41251	9.9134	8.20253	7.59926	7.91956	8.83793	8.99533	8.73042	7.26263	6.88854	8.27969	7.31318
GATA2	-2.31612	-0.854749	-2.64445	-2.14273	-2.55906	9.09567	9.63393	10.0782	9.13164	9.74099	9.44529	9.96188	10.8153	9.36012	10.4533	2.84156	8.37814	11.4449	9.52672	6.38174	6.10256	5.25785	4.74674	4.14882	9.4761	6.99031	10.1582	10.8206	11.9838	8.73363	9.28152	6.79044	10.1682	8.76548	10.4982	11.9827	11.2289	10.777	10.6649	8.61267	8.43069	8.61289	9.52789	9.59196	10.3845	6.34454	7.52679	9.43622	8.67472
GATA3	-1.74083	-1.48322	-2.1005	-2.43998	-2.72448	3.47792	5.49482	5.09367	4.54913	5.43973	2.85332	4.62265	4.29012	4.54345	4.09586	-0.253733	4.44683	4.63643	3.33	1.97732	1.03682	0.880475	0.587204	0.536401	5.51953	3.93347	3.19509	4.9869	4.99349	4.39962	3.96289	2.56688	4.57772	1.51387	4.05507	4.58764	4.76246	4.28354	5.70603	3.73772	2.89207	3.43724	4.43611	5.67046	5.69109	3.93899	5.05432	3.44301	4.11809
GATA4	0.0434461	-0.397235	0.0236476	-0.474007	0.658653	-0.349266	1.08304	-0.392638	0.889742	0.65049	-1.62618	0.046142	0.461925	-0.341847	-0.701851	-2.29492	0.531237	0.521604	0.17575	-1.22972	-1.70592	-1.56717	-1.40207	-0.878874	1.14462	-0.120863	-0.30937	0.313358	0.514975	0.454444	0.337382	-0.459004	-0.146497	-2.40489	-0.122747	-0.0169503	-0.402724	0.391944	0.470302	0.0703267	-0.542816	-0.362599	0.0563383	0.885241	1.44564	0.180711	0.829781	-0.481547	0.789711
GATA6	0.417308	-0.360994	0.17618	-0.275472	-1.51154	-1.30947	0.0161409	-0.162959	0.124739	0.534795	-0.344995	0.181074	-0.446397	0.132779	-0.267785	-1.50642	0.323861	-0.436153	0.354751	-0.728569	-0.520569	-1.39962	-1.81621	-0.981235	0.71999	0.593533	-0.0576454	0.487819	-0.0634299	0.473491	0.129293	0.118247	-0.137239	-0.352517	0.120505	0.231669	-0.289991	-0.620506	0.505528	0.21789	0.159078	-0.463429	-0.143379	0.253873	0.394613	0.695311	0.168459	-0.231849	0.299526
GLI2	1.11279	0.389323	1.18469	0.742087	0.364459	2.7103	0.732594	0.618181	2.25867	1.18311	0.587338	2.42684	-0.799624	0.157693	0.568543	0.144558	1.41779	1.38381	2.18299	0.481834	-0.127977	1.126	-1.26431	-0.0368898	0.889114	1.02585	2.0212	1.00306	0.480207	1.49428	1.51992	0.859071	1.68919	0.65845	1.61184	1.1185	0.429659	-0.282252	0.918488	1.65969	1.49642	0.134097	0.493278	1.93472	0.377306	1.03473	0.471316	1.49314	0.864501
HIF1A	-1.00176	-0.968539	-1.12162	-1.29258	-0.976751	-0.169937	-0.053904	0.186265	-1.19069	-0.17265	-1.78447	-0.856136	0.0267623	-0.325574	-0.370892	-1.43003	-0.980482	0.840791	-1.41641	-0.890326	-2.00484	-1.10273	-1.30364	-1.64025	-0.494117	-2.65089	-0.411895	-0.175586	1.30143	-0.414103	-1.39312	-1.87194	-0.691378	-2.64102	-1.35609	0.341568	-0.0287411	0.187629	-0.587103	-0.455584	-1.67051	-0.937366	-0.681485	-0.210418	-0.19398	-1.69604	-0.443834	-1.54128	-0.879659
HLF	-0.974685	-0.619735	-0.914962	-0.957315	0.38606	0.0576005	1.63172	0.272315	0.21169	1.31141	0.332506	0.464049	0.50989	-0.214305	0.11459	-0.429843	0.474244	0.567207	0.471803	0.229195	0.551525	-0.125416	0.657124	0.644572	1.13829	0.337951	0.160246	0.531466	0.638743	1.04293	0.115186	0.51094	0.474481	-0.254189	0.270663	0.233237	-0.304383	0.0848943	0.164653	0.383293	0.337289	0.266516	0.146045	1.26113	1.15281	0.558123	0.747617	0.0963527	1.76118
HNF1A	0.531147	-0.0269671	-0.211428	-0.0777376	-0.975931	-0.890069	-1.36572	-0.71188	0.182098	-0.115489	-0.075262	-0.601129	-0.030497	-0.205779	0.193885	-0.305041	0.374335	-0.959863	-0.0765629	0.428793	-0.753774	-0.314629	-0.710883	-0.697395	0.0960837	-0.387731	0.896309	-0.20291	-0.53843	0.197738	-0.292023	-0.492524	-0.0179795	-0.02631	0.18413	0.619363	-0.230225	-0.87692	-0.0261981	0.0194144	0.263019	-0.345319	1.14964	0.320465	0.915209	0.195331	0.444981	0.357717	0.335887
HNF4A	-1.25745	-0.586437	-1.32656	-1.36344	-0.930331	-0.135988	2.15047	1.35342	0.579409	1.52756	0.391706	0.201963	2.00521	0.228483	1.96774	-3.12515	-0.141002	1.87947	0.347431	-0.352542	-1.67598	-1.7598	-1.37502	-1.69517	0.897102	-0.202705	1.32663	1.20524	1.74451	0.424954	-0.89177	-0.432783	0.582862	-0.0367334	0.305669	2.49111	1.17456	1.11936	0.373573	0.466785	-0.158076	0.938941	1.34022	1.6741	1.24734	-0.31304	1.1458	0.196306	1.1991
HSF1	-1.32079	-0.999157	-1.37903	-1.41296	-1.61417	-0.695334	-2.68733	-1.82703	-1.36607	-1.54307	-1.83583	-1.92879	-1.16711	-1.93718	-2.56541	-3.16731	-2.22313	-1.37056	-2.92391	-2.2585	-1.04026	-2.0556	-1.03017	-2.98488	-2.05949	-2.67363	-2.11982	-1.50165	-0.576353	-1.61955	-2.84045	-3.27481	-2.31566	-1.67698	-1.68394	-1.71926	-1.3101	0.0331607	-1.64783	-3.06717	-2.7519	-1.9942	-1.62154	-2.20738	-1.09723	-3.11068	-3.03826	-1.62537	-2.87342
IKZF1	0.450607	0.130015	0.226033	0.446241	0.0447466	3.37599	2.42907	2.53569	2.88394	2.63557	2.38178	2.94478	2.7791	2.78979	2.52954	2.48038	2.92147	3.41384	2.82216	2.82856	2.66451	2.68373	2.71403	2.48486	2.22673	2.9	3.34381	2.48996	2.86082	3.10781	2.95223	2.24712	2.51683	2.53465	2.93134	2.6861	2.85831	2.41588	2.94037	3.09797	2.52888	2.43394	2.54181	2.39935	1.89791	2.33974	1.80698	3.00445	2.90145
IRF1	-2.70767	-3.40496	-3.75601	-3.76293	-3.12464	3.18936	3.76547	2.38318	3.39199	4.59483	1.89403	4.27266	3.10981	3.10931	2.93215	1.2402	4.88194	4.24768	3.0619	1.9051	1.64707	2.79151	3.48585	1.62761	3.10945	2.16131	2.73066	3.37935	4.54421	6.81478	3.05547	2.34154	3.01443	3.08593	3.56633	4.12403	2.34549	3.12998	3.7869	3.51159	3.40346	3.96124	2.36999	3.65377	3.14179	1.78344	2.30663	3.38234	3.9062
IRF2	-2.64808	-2.48952	-2.81964	-2.81122	-2.14509	0.919032	0.698297	0.277696	0.509068	0.880428	1.00061	0.611798	1.00245	0.946058	0.912001	0.550161	1.07605	1.13144	0.70689	0.390824	0.692958	0.879232	0.987524	0.911004	0.0704213	0.473229	0.884889	0.784463	1.76788	1.20524	0.795238	0.766729	0.64928	1.58369	1.10815	1.5387	0.804201	1.66157	1.0271	0.818878	0.932592	1.25743	1.10397	0.587128	1.1113	-0.0161015	0.115266	0.829527	0.917237
JUN	-2.73751	-0.56644	-2.93929	-2.55226	-4.71302	6.87223	6.96139	4.82735	4.56008	5.00603	4.14059	5.75341	6.93441	4.79759	5.1812	3.49468	5.72764	8.64423	5.72075	3.98957	5.87156	4.99625	4.07409	6.21535	5.75958	4.76323	5.31122	6.5674	9.18372	6.55066	4.13725	2.7134	4.58869	3.81697	5.00436	7.28497	5.80388	7.37616	6.32087	4.54912	2.76999	3.51202	7.01648	5.06997	9.96735	2.28916	4.21304	4.55292	7.39433
JUND	-3.68092	-1.92583	-3.69112	-2.95766	-3.73329	2.73732	3.97928	1.14498	0.130539	1.97802	1.62636	1.34886	3.28316	2.21421	2.21659	0.134684	1.28427	3.16008	1.3602	1.43599	2.28058	1.37371	0.788625	2.95468	1.47734	0.732378	2.15519	2.8516	4.82053	1.54319	0.47911	0.839009	1.24768	1.0237	0.615216	4.44201	2.37685	3.33917	1.90472	1.12571	-0.0312212	0.837381	3.75509	2.04539	5.53066	-1.15437	2.16606	0.825499	3.03362
KLF5	-1.0691	-1.04241	-1.23346	-0.95427	-1.02873	0.55438	0.21848	0.0817648	0.99535	0.400581	0.216437	0.639466	1.26768	0.142084	0.0208624	0.186546	0.697812	0.67618	0.851148	-0.738814	-0.271737	0.992812	0.341948	0.535534	0.102194	0.532145	0.359154	0.295726	0.966183	0.747565	0.669813	-0.537746	0.187947	0.870254	0.768555	0.0863229	0.412856	1.17501	1.16289	-0.139456	-0.416881	0.359014	0.694816	1.0514	1.4557	0.0192059	-0.527507	0.339114	0.578676
LEF1	-0.629886	-1.08887	-1.48649	-1.38431	-1.15121	1.27393	0.940376	0.856582	1.24777	0.866233	0.843095	0.484613	0.793539	1.20404	0.532187	0.747349	0.524338	1.00186	0.0977391	1.09088	1.06978	1.00002	1.1292	0.971844	0.701968	0.764939	0.848557	0.958608	1.47218	0.858869	0.795237	0.458396	0.461763	-0.0989622	0.96921	0.658761	1.32515	1.54194	1.18716	0.416131	0.390294	0.912968	1.49089	0.52763	0.788771	0.409218	0.834672	0.778178	0.856279
MAX	-2.74257	-2.57494	-2.32706	-2.08846	-1.35029	-0.610832	-4.22654	-3.0928	-3.17566	-3.80454	-2.84511	-3.68224	-2.2746	-3.41159	-2.7809	-0.972813	-4.27166	-2.64188	-4.58284	-0.806698	-0.0579789	-0.613763	-0.0723112	-1.79079	-3.87469	-4.16242	-2.58381	-3.63199	-2.93127	-3.54836	-3.63301	-2.81959	-3.97351	-2.18675	-3.57388	-3.19012	-2.47878	-1.69159	-3.49226	-4.09125	-3.44451	-2.38185	-3.66429	-4.69905	-3.91247	-4.93878	-4.47129	-3.73713	-4.17369
MAZ	-0.128278	-0.112782	-0.329495	-0.0422852	0.01475	-0.0552226	-0.879666	-0.178415	-0.633472	-0.00387819	-0.641282	-0.0154515	-0.35777	-0.339406	-0.157232	-2.7959	-0.279214	-0.229193	-1.38825	-1.04264	-1.55124	-1.0942	-2.05434	-2.65975	-0.473083	-1.99958	-0.789888	-0.339299	-0.116648	-1.3728	-1.53415	-1.98476	-0.225326	-0.403833	-0.408518	0.207556	-0.440947	-0.448651	-0.868547	-1.20384	-0.752654	-1.48213	-1.43282	-0.917973	-0.36801	-1.58746	-1.91867	-0.228192	-1.19651
MEF2A	-0.213355	0.574813	-0.540725	0.475704	-0.522321	0.643952	1.71406	0.968382	0.13773	0.489478	1.34263	0.844689	0.547333	1.6732	1.49144	-0.0132908	1.4861	2.61676	1.83337	0.72757	0.591825	-0.433012	-0.901161	0.076349	1.94325	1.395	0.971471	0.809399	0.973169	2.21033	1.34158	0.804919	1.15763	1.67994	0.330853	1.18537	0.161749	0.572462	1.5013	0.416934	-0.103721	-0.229363	0.50293	0.454399	1.63295	0.990149	0.945138	0.852917	2.24123
MITF	1.48773	1.40472	1.5615	1.47393	0.632528	2.74512	2.36418	2.70729	3.15784	2.46646	2.34142	2.30268	3.04278	1.89538	1.96343	2.09229	1.59024	2.96795	3.09222	1.92489	2.53781	2.23352	2.8234	2.03828	3.22862	3.47948	3.47692	2.57334	2.73782	2.76329	2.7178	2.0158	1.71715	2.26461	3.24606	2.58435	2.30627	2.54626	2.54562	2.82115	2.30283	2.33089	2.71185	2.71111	1.94129	1.61399	1.59456	2.79286	1.86945
MYB	-0.475631	-0.00604645	-0.0264334	-0.0106295	-0.214838	0.0666693	1.00668	1.45537	0.983177	0.90179	1.36679	1.07697	-0.0627525	1.34816	1.1908	1.3376	1.1492	0.652074	0.966067	1.12192	1.33972	0.529595	0.839806	1.21257	0.802733	1.61469	0.475826	0.669586	0.9577	1.35042	1.6002	1.80856	1.66792	1.12982	1.09113	1.27366	1.19054	0.410562	0.808002	1.49361	1.68847	0.432743	1.3369	0.852544	0.997412	1.85437	1.36089	1.1163	1.71658
MYC	-12.204	-11.1884	-12.2904	-11.157	-9.57169	-4.7488	-9.14723	-11.1325	-11.5782	-10.2143	-9.06615	-12.0951	-5.37703	-9.08766	-9.19839	-7.06427	-11.8794	-7.38699	-13.4163	-6.25281	-6.12828	-5.84419	-4.11171	-5.44786	-10.5963	-12.7862	-8.41474	-9.90704	-4.8862	-13.8988	-11.5538	-11.5364	-10.7425	-7.13575	-11.4371	-9.39715	-7.6707	-4.36533	-11.8746	-11.795	-12.4306	-9.47631	-8.28806	-12.1343	-5.46065	-16.2329	-10.8552	-10.7743	-10.6507
MYCN	-1.80077	-0.866768	-1.70509	-1.62001	-0.288582	-2.49805	-2.68683	-3.83391	-3.33695	-2.54576	-3.692	-3.79649	-1.48119	-3.55304	-4.60725	-5.42045	-4.37401	-1.96593	-4.19591	-4.12581	-3.37353	-3.5517	-3.43996	-3.97084	-2.57831	-4.50462	-3.46704	-2.53252	-1.27503	-2.4437	-4.48542	-5.02519	-3.27953	-3.86496	-4.30889	-3.03353	-2.8906	-0.359225	-3.02691	-4.78208	-4.63606	-3.22551	-2.86965	-2.45424	-0.869265	-4.84336	-4.68465	-4.08146	-3.14571
NANOG	-1.66011	-1.66678	-1.76454	-1.35868	-1.7445	0.520426	1.09888	1.1022	0.69269	0.558124	0.502132	0.501441	-0.21521	0.833484	0.953845	1.44276	0.722445	0.892886	1.12093	0.37129	0.59773	0.33637	0.398486	0.854879	0.933682	1.25998	1.27238	0.771966	0.898922	0.587358	1.05601	0.906644	1.27375	1.62317	1.12981	0.502382	0.0737325	0.431581	1.12472	1.05875	1.06988	1.2221	1.64841	1.84452	0.99161	1.20331	1.40687	1.06012	0.984877
NFE2	0.673735	0.958912	0.679724	1.00231	0.229622	-0.369531	-0.475071	-0.334875	-1.39768	-0.877805	0.218059	-0.928766	0.310809	-0.520101	0.414903	1.57438	-0.731002	-1.23223	-0.677293	0.850947	1.64399	1.34807	1.09748	1.75958	-0.491538	-0.757901	-1.35503	-0.363431	0.493022	-1.03822	-0.63745	-0.0511138	-0.103997	0.425493	-0.129329	-0.119157	0.406425	0.925931	-0.370745	-0.269511	0.436236	0.037843	0.279656	-0.557901	0.33787	-0.893669	-0.788252	0.182425	-1.02236
NFE2L2	0.968142	1.599	1.09672	0.513398	-1.04486	3.69915	4.92822	3.84851	3.72631	4.34579	2.79527	3.88622	4.30136	2.98493	3.7391	1.15543	4.2759	4.01118	3.40451	2.07747	2.22429	2.75187	3.21296	2.58962	4.45844	3.35834	3.60786	4.25386	5.10154	3.0736	3.57703	2.99598	3.97352	1.68296	3.80032	4.31901	4.08225	3.72791	4.09539	3.61185	2.65535	3.69364	4.3878	5.13088	5.25709	3.35919	4.13418	3.139	4.19437
NFKB1	-3.07173	-1.78117	-3.57362	-2.26186	-4.28773	5.78494	8.48101	5.33206	4.93463	7.03294	6.23485	6.10484	6.54317	5.15282	5.74667	3.44281	6.50447	9.44165	7.15211	2.9155	4.86215	3.473	3.94663	5.80185	7.55399	4.51701	7.48016	7.21257	9.80008	6.99109	5.55819	3.5054	4.48075	7.93564	6.2156	8.21616	4.59282	6.74147	6.65276	5.52354	4.44113	4.86015	6.41829	6.18916	7.40962	3.33869	3.79215	5.79459	8.67519
NFYA	-1.06145	-0.981405	-0.934662	-0.731873	0.391159	-1.0788	-1.7876	-0.523567	-2.29266	-1.52613	-1.73659	-1.83819	-1.40232	-0.223549	-0.826836	-1.90679	-1.82723	-2.85416	-2.44216	-0.690442	-1.4817	-1.61357	-1.05868	-2.52239	-2.18673	-1.8132	-2.00598	-1.34651	-2.23621	-2.31058	-1.68282	-0.868046	-1.36154	-0.901759	-1.41277	-0.98522	-1.09724	-0.818492	-1.53681	-2.23031	-1.31184	-2.02535	-1.85386	-1.86015	-1.7981	-1.99805	-2.01255	-1.52973	-2.57171
NHLH1	-0.0722649	0.506181	0.0348938	0.173155	-0.453842	-1.5548	-0.937048	-1.30946	-1.659	-1.78215	-1.48534	-1.46617	-1.49847	-2.53391	-2.85373	-1.3611	-1.49013	-0.382166	-1.13931	-2.1047	-1.73459	-2.24291	-1.7655	-1.42632	-1.301	-0.72917	-1.27457	-0.980081	-0.979647	-1.16262	-1.67703	-1.47752	-2.11112	-1.22156	-1.14751	-1.62221	-1.83932	-1.72696	-1.07855	-0.981648	-2.21012	-2.42825	-1.67033	-0.975892	-1.39747	-1.73447	-1.08548	-1.34624	-1.05681
NR1I2	0.269032	0.524993	0.400326	0.504787	-0.038936	-0.554104	-0.758728	-0.666258	-0.345987	-1.23697	-0.960818	-0.916193	-1.5799	-1.47502	-1.10421	-0.537652	-0.267402	-0.528761	-1.43384	-0.492599	-0.942266	-0.800572	-0.180557	0.170144	-0.778499	-0.727835	-0.653711	-1.17835	-2.58377	-1.85196	-0.93967	-0.08847	-0.738767	-0.0714612	-0.967943	-1.36599	-2.2461	-1.14113	-0.939051	-0.677639	-0.893848	-1.45481	-1.22868	-1.24563	-0.432621	-0.772513	-0.497316	-1.49592	-1.06982
NR3C1	-0.205644	0.201293	-1.01747	-0.629892	-0.594202	2.04675	3.08107	2.11162	1.14095	2.25532	1.40476	1.40215	2.23918	1.63881	2.27029	0.318523	2.34202	2.91662	1.72265	2.14232	1.80646	1.75012	0.63668	2.01711	2.5887	1.31599	2.32087	2.42894	2.69441	3.16736	1.84857	1.6032	2.01415	0.313919	0.584895	3.51172	2.51882	2.192	2.27231	1.18537	0.385391	2.2625	3.23221	2.20014	3.56606	1.22442	3.41847	1.21955	2.62963
NRF1	0.318134	0.63789	0.19191	0.635561	1.3828	-2.47221	-0.470477	-0.602763	-1.13779	0.0486784	0.154822	-0.558506	-1.33556	-0.8809	-0.402294	-1.49238	-1.37332	-1.27415	-0.418766	-1.22309	-0.585258	-2.33994	-1.47584	-0.924824	-1.24444	-0.618697	-1.49579	-0.377734	0.67649	-0.627602	-1.57013	-0.564723	-0.683041	-0.699503	-0.829689	-1.10102	-0.156149	0.342333	-0.28953	-0.820257	-0.693761	-0.532583	0.0828402	-0.362004	0.146654	-1.04888	-1.17108	-1.04912	-1.23195
PAX5	-0.597751	-0.553918	-0.788425	-0.344821	-1.12822	0.482012	1.36537	0.562228	0.117299	1.07068	0.959984	0.682354	0.299347	1.90925	1.3081	0.238662	0.773027	1.48999	1.38772	1.02027	0.00291371	0.121018	-0.173917	-0.390302	0.877802	0.391964	1.90971	0.505327	0.231732	0.56209	1.05882	-0.0313774	0.846582	1.39913	1.00967	0.897144	1.26513	0.249663	1.4368	0.384858	0.282343	-0.160983	0.569191	0.519154	0.572297	0.35997	0.0178422	0.913222	-0.0705644
PAX6	1.30251	1.0618	1.43757	1.11708	0.186412	1.65398	2.22183	1.96418	2.41764	2.11521	1.87533	1.96528	2.14381	2.16483	1.80889	0.767352	2.29502	1.74462	1.80656	1.39894	0.906716	1.38583	1.12174	0.974712	1.82769	2.00711	1.76489	2.12062	2.14294	1.89984	2.12983	1.70153	1.934	1.54943	2.12525	1.61404	2.04175	1.5829	2.05973	2.23013	1.71407	1.70531	2.01563	2.01229	2.21324	2.2845	1.88954	2.02613	1.61902
PBX1	3.72658	4.02912	3.85507	3.52497	2.778	2.96368	3.65744	1.85716	3.63248	2.71106	2.34902	3.3332	3.1419	1.98439	2.82561	0.839493	4.03141	3.88972	3.408	1.02084	0.184657	1.82307	0.236002	1.55578	3.2765	2.69622	2.90968	3.07613	2.89218	2.77472	3.59305	1.45525	3.56202	2.10474	3.27552	3.1756	2.00621	1.39125	2.64881	3.11844	2.77896	1.94834	1.91283	3.30765	2.58881	3.11504	3.09516	2.82761	3.20804
PLAG1	0.124529	0.136206	0.311791	0.141342	-0.653852	0.876271	0.856007	1.21058	1.42446	0.365309	1.55814	1.24561	0.144985	1.98056	1.55968	0.984438	0.997391	1.2345	1.55363	1.01737	0.906202	0.951455	0.177428	0.05949	1.01366	0.983474	1.91566	0.724548	0.783254	0.919802	1.47694	0.836522	1.32324	1.41199	2.02891	0.869475	1.35276	1.30353	1.36288	1.734	1.13966	1.06598	0.812953	0.455523	0.627909	1.12545	0.634612	1.84836	0.686767
POU2F1	-1.59223	-0.609956	-1.3777	-1.42777	-1.35133	2.48924	2.10077	2.1206	2.03105	2.02029	2.4003	2.87931	1.51991	2.58167	2.86511	2.16677	2.6502	2.55285	1.74355	2.28632	1.30584	2.66272	1.08747	0.642156	1.80445	2.02895	2.28551	2.58075	2.67918	2.54258	2.80736	1.82698	3.02339	2.14832	2.83084	2.9054	2.95725	2.09129	2.69649	1.39621	2.65175	2.44123	1.86625	2.00915	2.10775	1.78676	1.03289	2.81044	1.88363
POU3F2	1.27487	1.45069	1.42195	0.511684	1.10231	1.01171	2.69325	1.08346	2.30022	0.924086	0.553491	1.67857	1.29187	1.40818	1.44006	0.767696	3.12736	1.72543	2.50394	-0.027558	-0.361185	1.12602	0.805013	1.94932	2.59123	2.61708	1.39277	1.87758	2.30114	2.40889	2.35825	1.00144	2.04143	0.0772223	2.20456	0.943118	2.52373	0.153396	2.47316	1.88376	1.23655	0.868617	1.50292	2.69297	2.58812	2.68356	2.62972	0.79761	2.76163
POU5F1	-0.0467836	0.186673	-0.361512	0.222554	-0.500834	0.566902	-0.701563	-0.547216	0.139602	-0.685987	-1.09418	-0.346213	-0.593546	-0.599906	-0.0747524	0.296666	0.01034	1.65487	1.24968	-0.155441	-0.166079	-0.535984	-0.00467904	0.07128	-0.62957	-0.247337	0.777767	-0.643516	0.0378631	0.749682	0.405155	-1.26598	0.220046	0.464187	1.0147	-0.644541	0.387636	-1.01201	0.193182	0.546874	0.312313	-1.19569	-0.480318	-0.162416	-0.360946	-0.528248	-1.58852	0.730451	-0.215725
PPARA	1.07247	1.25635	0.916212	1.05653	1.31972	0.816127	0.978466	0.941627	0.987434	0.59024	1.8225	1.4415	2.16742	1.28626	1.32304	2.08153	1.06101	0.772306	0.625114	1.63032	2.16025	1.53776	2.24499	1.66246	1.98651	0.992118	0.614964	1.50373	1.81131	1.38037	1.4219	1.10296	1.06549	0.733785	0.932663	1.56702	1.64295	2.99522	2.19075	1.29166	1.84611	2.07361	1.74664	0.42486	1.85054	0.565354	1.19733	1.71815	1.24081
PPARD	-0.949986	-0.756486	-1.22211	-0.770448	-0.14326	2.32349	1.49402	1.9666	2.02206	1.61175	2.62841	2.04929	3.05751	2.45698	2.26811	2.01458	2.25784	1.95132	1.6905	1.85895	2.29151	1.88909	2.05884	2.7897	1.76494	1.83128	1.82487	2.54736	3.03785	2.50944	2.02404	1.98834	1.54057	2.03468	1.7631	3.05997	2.70644	3.17333	2.58186	1.94638	2.05235	2.43828	3.35472	1.79397	3.39221	1.31537	2.51937	2.10674	2.32772
PPARG	0.711818	-0.274607	0.177587	0.0389321	-0.715192	0.993291	2.24733	1.56701	1.82244	2.04307	0.887074	1.13787	2.11138	1.23101	1.16102	0.828748	1.15714	1.15339	1.40678	1.05907	1.00553	0.344509	0.427429	0.970826	2.0278	1.63677	1.30279	2.1361	1.40662	0.96873	0.991739	1.77834	0.664642	0.677779	1.46704	1.55164	1.24241	1.23569	1.62454	1.59505	1.54468	1.86305	1.61929	2.22175	1.58397	2.07905	2.05261	1.25977	1.43382
PRDM14	-0.223037	-0.0221417	0.150568	-0.160205	-1.5527	1.97395	2.24484	2.4286	2.4824	1.71265	2.32693	2.91452	2.46002	2.18077	2.20052	0.804464	2.14763	1.86461	1.97921	1.46472	1.10634	1.73204	0.853696	1.05854	2.56195	2.54787	2.02352	3.03216	2.72107	2.20693	2.80704	1.7817	2.79474	1.44488	2.56434	2.28843	2.66731	1.87616	2.75971	2.39617	2.46254	2.2997	2.06425	2.35042	2.6028	2.08363	1.92528	2.09865	2.26236
RARA	0.00687314	-0.271529	-0.908689	0.226084	-0.87063	0.454979	0.869357	0.285106	-0.299683	0.660872	0.712677	0.442196	0.881778	0.915819	1.02125	0.252973	0.579311	0.963389	0.918544	0.498047	0.192072	-0.127602	-0.0963204	0.570153	0.455778	0.160026	1.17348	0.250262	-0.0661741	0.787169	0.315379	-0.484349	0.167481	1.76282	0.32209	-0.264645	0.704306	-0.227482	0.742442	0.458326	0.862548	-0.132853	0.310633	-0.706946	0.000424951	0.053134	-0.21209	1.09864	0.578855
REL	-1.80311	0.157068	-1.56791	-0.127143	-2.11123	2.66854	5.81786	3.15195	0.963244	2.28331	2.79752	2.18191	3.2256	1.32444	3.83118	2.09605	3.70226	5.93159	3.11248	1.61186	3.40062	2.57052	2.76711	4.75076	4.30284	0.905791	3.2916	3.90598	5.73504	4.19899	1.05665	0.342055	2.21629	2.05721	1.37967	5.5595	2.38421	3.63199	3.04502	2.10557	0.631709	1.26935	4.53744	3.62135	4.38178	0.587088	2.40542	1.36629	6.03534
RELA	-4.97624	-3.19595	-5.68331	-4.34251	-6.73317	8.39853	10.4733	6.09758	4.99283	7.84438	7.434	6.73492	9.0036	5.38715	7.18387	5.10034	7.59434	11.4426	7.7725	4.42998	7.66	6.46197	6.14746	8.56143	8.88062	4.9788	8.16683	8.00629	12.6458	8.74555	5.42265	4.27431	5.08386	8.48156	6.80478	10.0772	5.40112	8.88323	7.81453	6.48923	4.24982	6.38725	8.37293	7.25745	9.5081	3.05161	4.71175	5.9056	10.9484
REST	17.2216	17.6747	17.5429	17.6436	13.9255	-1.53957	-2.75897	-1.86517	-2.08077	-4.3758	-1.85401	-0.737034	-3.40198	-1.70422	-3.40344	-2.46445	-3.21311	1.55428	-0.854043	-2.54074	-4.01481	-3.0042	-3.70049	-4.32862	-2.14405	-1.71764	0.746623	-2.21731	-2.28288	-0.314899	-0.395816	-4.20069	-1.34975	-0.282266	-1.05377	-1.28151	-1.75321	-3.23884	-1.03185	-0.385491	-1.96072	-3.32926	-1.98822	-1.82666	-1.38154	2.21157	-3.09306	-0.74556	0.350782
RREB1	0.293409	0.337136	0.282284	0.206613	0.524938	-1.16133	-0.281079	-0.554979	-0.415307	-0.585777	-0.799317	-0.719502	-0.450915	-0.888431	0.101479	-0.564089	-0.503204	-0.700588	-0.0513887	-0.508685	-1.46156	-1.34607	-1.05748	-0.0766405	-0.0190783	-0.617862	-0.0303746	-0.330147	-0.189804	0.0390841	-0.287794	-0.937344	-0.197953	-0.34101	-0.0486271	-0.129345	-0.133193	-0.368426	0.000330408	-0.532223	-0.587213	-0.802952	-0.359657	-0.088475	1.39888	-0.113416	0.313108	-1.24791	0.601319
RUNX1	-0.267081	-0.367012	-0.401008	0.306545	-0.994707	2.25885	1.56459	1.19246	0.999189	1.7701	1.35254	1.68101	2.26067	2.12325	1.96974	3.95769	2.12715	2.23419	2.75829	2.28479	2.64787	3.68824	2.68434	2.9516	1.76505	1.79249	2.74168	1.6726	1.69176	1.44193	1.96563	1.40554	1.82077	3.43494	1.89511	1.70602	0.947964	1.77287	1.29887	1.98811	1.94793	1.87185	2.05069	2.03924	1.44803	1.50623	1.26149	2.54448	2.16629
RUNX2	-0.975972	-0.998096	-0.726788	-0.767171	-2.16729	1.35178	0.244563	0.512917	1.71828	0.392753	0.20912	0.927669	0.99919	0.713034	0.573358	0.334972	0.318529	1.66764	1.08598	0.371249	0.411737	0.946015	0.686645	-0.0401338	0.39892	0.554753	1.2233	0.718592	0.947032	1.22739	1.28045	0.0889489	1.36472	0.610857	1.53852	1.01199	1.79316	0.763694	0.703056	0.612293	0.303768	-0.114432	0.482119	0.595133	0.792466	1.72528	-0.212503	0.665561	0.041134
RXRA	-1.54251	-1.36798	-1.91998	-1.29522	-2.05061	2.1852	2.69734	1.68794	2.5566	3.10353	3.10003	2.48806	2.51895	1.86298	2.78169	0.123133	2.20723	3.28893	3.97623	1.31083	0.873527	0.583708	1.3428	0.150264	2.29626	1.8913	3.94055	2.2995	2.10378	2.22476	2.075	0.924801	1.89	3.12343	2.14487	1.94684	1.62417	2.05447	2.44493	2.14662	2.19199	2.56057	1.89325	2.25458	1.20856	1.68643	1.54611	3.03811	2.28581
SMAD3	-0.26407	0.922067	0.0754746	-0.0566308	-0.0693676	3.33716	4.43276	3.55028	3.81149	4.38098	3.14574	4.71955	3.98719	3.51524	3.20433	1.85705	3.8659	4.48603	3.96361	3.13827	1.88727	2.31552	0.792231	2.34377	4.77349	3.02408	3.57292	4.19726	3.54366	3.52641	4.41293	2.58321	4.75019	2.89664	3.94715	4.89292	4.30986	2.83931	5.15996	3.95983	3.46762	4.11528	4.01063	5.05863	4.51216	3.59147	5.01936	4.06248	3.94153
SMAD4	3.48962	3.07156	3.42834	2.79096	2.04025	2.32996	2.81378	2.24566	3.84903	2.06505	1.85023	3.7111	1.81579	1.90949	2.58245	1.05102	3.24811	3.3717	4.64541	0.533565	-1.22642	0.664116	-0.54251	-0.320545	3.04385	2.61535	3.68279	2.87583	1.84768	2.55139	3.76651	1.13661	3.69102	1.98539	4.6669	3.34174	3.44725	0.688507	3.38529	3.83472	2.88339	1.29795	1.83144	4.43345	1.84112	3.38055	2.64814	3.59593	2.93668
SOX2	0.637317	0.700589	0.382963	0.30683	0.42403	0.180573	1.43399	1.20983	0.564487	1.10662	-0.331043	0.694272	0.962722	0.473815	0.47745	0.384757	0.471797	0.838942	0.118248	0.672032	0.28629	-0.0239085	-0.00446651	1.03876	0.878769	1.38669	0.79519	0.830225	0.920781	0.972723	0.224595	0.928976	1.04589	-0.337149	0.59393	0.624781	0.509361	-0.320358	0.499294	0.384377	1.0161	0.251378	0.58554	1.34525	0.432026	0.508942	0.920237	0.0480085	1.7181
SP1	-2.09675	-1.25183	-2.48625	-2.08351	-2.86058	2.9709	3.09807	2.22014	1.91255	2.91821	2.13084	2.54669	3.96334	2.65165	2.87905	0.721431	1.63868	4.64286	3.3215	1.48596	2.06621	1.06837	1.33888	0.242478	3.16658	1.40189	3.21607	3.25347	3.88572	2.82143	2.13478	0.536866	2.76176	2.09814	2.7927	3.92158	2.47344	3.78469	3.67621	2.68285	1.72333	2.8724	2.77665	2.59556	4.01342	1.13658	0.851987	2.99599	2.80665
SP3	-0.202723	0.0992766	-0.770857	-0.887687	-0.82742	0.236986	0.952602	0.330521	0.698858	1.17138	0.882688	1.13568	1.20603	0.510318	1.16278	-0.0393755	1.06089	1.74672	1.56464	1.01399	1.17209	0.618164	0.00154077	0.447716	1.53792	1.25457	0.691848	1.36738	2.01501	0.981058	0.740097	0.789722	1.97919	-0.0924931	0.952356	1.41139	1.76593	1.59472	2.16637	0.935647	1.29379	1.09112	1.29642	1.00585	1.76414	1.06748	1.33912	0.682218	2.18164
SPI1	-5.4556	-6.75548	-6.64454	-5.51104	-4.8627	10.6398	6.81637	8.46288	8.37776	9.69282	9.29605	7.02509	9.25817	7.51098	7.36727	7.56768	6.10063	10.4084	8.42267	9.50142	10.8495	8.10012	10.4292	6.5523	8.15949	5.98397	11.5394	8.64455	9.40814	9.16549	7.11939	7.67178	5.21242	12.464	8.70756	8.38889	7.91762	11.8206	8.32443	7.85853	7.28345	9.41237	7.73499	6.68168	5.39867	4.22614	2.8341	9.5127	7.54289
SREBF1	0.25755	0.197904	0.308302	-0.455559	-0.50104	1.60938	2.55791	2.18645	1.22974	1.93632	1.17408	0.589698	2.23123	1.14609	1.88479	-1.01865	0.0639255	1.71707	0.134845	1.41767	0.463406	-0.403573	0.72064	-0.826413	1.32484	0.158818	1.47791	1.47345	1.58094	0.585436	-0.268626	1.05001	0.420738	0.999617	0.119213	1.65672	1.22725	2.05763	0.786532	-0.403874	0.346636	1.18272	1.46037	0.891116	1.27403	-0.061935	1.78989	1.72741	0.221937
SREBF2	0.510282	0.843046	0.687904	0.406084	0.0177297	1.61	2.7642	2.23886	0.958865	1.83085	1.61439	0.906906	1.69521	1.31594	1.68025	1.09159	1.01199	1.43915	0.786258	1.75963	2.19611	0.717119	-0.0751162	2.07559	1.88443	1.07708	1.41288	1.79828	2.18884	1.28731	0.495474	1.32847	0.632951	1.16107	0.591089	1.85846	0.822814	2.28494	1.0204	1.05047	0.953569	1.02488	2.25832	1.43758	1.87012	1.34121	2.02859	1.54323	1.6112
SRF	-1.68087	-1.28111	-2.15702	-1.9191	-2.9737	2.12344	1.99972	0.522148	0.484471	0.936881	0.501304	2.3357	1.16577	0.320527	0.778043	-0.083209	2.5529	3.52242	1.67601	0.0362204	0.078363	1.33407	0.232375	0.884296	1.49244	-0.100355	1.84287	1.21328	2.25398	1.56636	1.15627	-0.621965	1.12444	0.960482	1.53363	2.62899	0.752863	1.66825	1.58637	1.38361	0.240835	-0.0455736	1.04751	1.21319	3.34131	-0.0896028	0.102286	1.6357	1.77743
STAT1	-1.48675	-0.90423	-2.6765	-2.37876	-2.66153	6.90652	8.09882	6.34193	6.75124	7.68424	6.04528	6.96576	8.39839	6.77981	6.43209	1.67497	7.55261	8.71174	6.16881	3.87558	4.70184	4.03767	5.44379	4.71885	6.76111	5.74548	7.08314	8.30938	9.24467	9.92957	6.51607	4.95191	5.76927	6.32623	6.90209	8.85454	7.121	7.93679	7.67883	6.24991	5.25503	6.90952	7.24791	7.15067	8.13205	4.14387	5.60571	6.19233	7.92539
STAT2	-1.82047	-1.3531	-2.48496	-1.9037	-1.8674	0.126768	1.20731	0.791619	0.306062	1.23054	0.977893	1.10575	0.810262	1.45648	1.03934	-0.194415	1.29402	1.35358	0.454389	0.468357	0.752358	0.249214	0.684285	1.07799	0.67417	0.740876	0.0164118	1.42067	1.59207	2.38908	0.475194	0.601358	1.05661	0.866809	0.736246	2.21879	0.263994	1.2612	0.96338	1.03525	0.949563	1.0478	1.04167	0.434121	1.61344	0.251646	-0.0205027	0.948361	1.57964
STAT3	-2.56912	-0.909588	-3.38478	-2.56052	-3.92167	4.68362	5.79636	3.1851	2.85676	4.44932	3.22292	3.8188	6.29876	3.38861	3.28308	0.862989	4.13896	6.6141	2.77641	2.1117	3.36198	2.68458	2.56739	4.09866	4.23662	2.72061	4.27992	5.31834	7.3226	5.52416	2.38227	1.08194	2.52729	3.37002	2.51264	6.07185	3.43396	5.41907	4.38934	2.66417	0.759475	2.60482	5.85784	3.8332	6.71758	1.13896	3.04266	2.49535	5.85674
STAT6	-0.204899	0.317447	-0.605391	-0.146282	-1.35842	3.94204	3.90601	3.08605	2.36554	3.55901	3.18077	3.12953	4.27635	3.27386	3.27716	2.15859	4.02961	3.97746	3.83357	2.71398	3.02942	2.62938	2.76423	3.11996	3.49875	3.17899	4.29856	3.60485	4.37831	4.05452	3.37997	2.54544	3.32	4.5313	2.60841	3.56323	3.36343	3.50728	4.28871	2.46126	2.4085	3.09987	4.37275	3.76298	4.4458	2.90487	3.97943	3.28248	3.83058
TBP	-1.97683	-1.31835	-1.83977	-1.18058	-1.33022	1.52664	2.96051	1.26525	-0.0409333	1.57673	1.01002	1.30915	1.80606	1.23623	2.26052	2.8575	1.91203	2.355	1.99153	2.12162	2.28142	2.66651	1.65534	2.79213	1.70019	0.37055	1.59209	1.21622	2.31783	0.693596	0.754037	1.48448	1.29767	2.19203	1.15413	2.00002	0.99452	0.405334	0.914649	0.905324	1.21737	-0.504661	1.76347	1.66805	2.44718	0.794241	1.46929	1.07007	2.45343
TCF12	-0.933506	-0.850201	-0.961198	-0.823679	-1.12101	-0.730607	-0.935511	-0.712594	-2.28846	-1.93302	-2.25463	-2.37325	-1.55682	-2.04609	-0.992058	-0.929657	-1.38947	-0.594415	-1.15529	-1.20504	-1.60042	-0.81495	-1.48935	-1.17894	-0.420384	-2.43343	-1.25472	-1.31474	-0.918155	-0.522411	-1.69276	-2.12684	-1.20259	0.347621	-1.69885	0.0940432	-1.2194	-2.09817	-1.01134	-2.24441	-2.65472	-1.98745	-1.39285	-1.13394	-0.14858	-2.18783	-0.626197	-0.781109	-0.960181
TCF3	2.07297	2.85824	2.17417	2.09591	1.22803	0.80974	2.19833	0.35938	1.07877	1.61325	0.290294	1.12678	1.25006	-0.254098	0.995299	-0.524823	1.28125	2.47183	1.73537	-0.877541	-0.987455	-0.497769	-0.633307	0.119376	1.37301	1.05291	1.15949	1.12942	1.50936	0.884657	1.3676	-0.138286	0.981852	0.9901	1.04243	1.10779	0.820449	0.557317	1.92749	0.617184	0.0673483	-0.764768	0.804854	2.08123	1.61518	0.953796	1.403	1.13815	1.46033
TCF4	1.52813	1.35482	1.38356	0.935595	0.715479	2.70159	4.36772	4.09402	5.09973	4.35566	2.30924	4.82461	3.74125	3.08072	3.53916	1.60092	5.16538	3.91455	4.91119	1.69084	0.448036	1.76111	0.889549	2.06155	5.42551	3.3009	3.83693	4.12139	3.8309	3.55435	3.81477	3.11917	4.25617	1.90299	4.15535	4.2906	3.18223	2.02979	4.28282	4.05058	3.03954	3.18571	3.61192	5.53259	4.56117	4.33589	4.21189	3.81988	4.70914
TEAD1	0.552467	0.724217	0.281729	0.382256	0.458679	1.52838	2.21913	2.03416	1.34042	2.2452	1.75348	2.14366	1.85018	1.96289	2.03373	1.11871	2.18241	2.0638	1.53288	1.5983	1.5866	1.23714	1.70834	2.10714	2.35294	1.96092	1.7418	2.13106	2.33151	1.9792	1.88249	1.79416	1.98562	1.48421	1.38491	2.50628	1.97732	1.87604	2.35	1.75819	1.69451	2.16702	2.54196	2.43354	2.95635	1.6736	2.95508	1.60697	2.73649
TFAP2A	-0.866939	-0.0484364	-0.926444	-0.52841	0.145273	-0.851953	-0.450328	-0.975115	-1.43293	-0.567698	-0.363348	-0.797686	-0.797758	-0.867946	-0.106066	-0.800136	-1.35316	-0.531565	-0.474557	-0.781947	-0.298422	-0.939423	-1.4759	-0.112562	-1.43709	-1.13543	-0.426613	0.167286	1.11832	-0.763587	-1.46192	-1.09213	-0.416162	-1.10154	-0.871157	0.191654	0.123818	0.562685	-0.663786	-0.567041	-0.811116	-0.397153	-0.080198	-0.333821	1.14036	-1.61185	-1.01065	-1.54599	-0.628372
TFAP2C	2.12026	3.13214	2.21856	1.76244	0.0438315	2.12075	5.66188	5.85494	5.29541	5.10561	5.21147	5.70775	4.69543	5.32035	5.13715	-4.15261	3.16348	6.20475	4.17094	1.1733	0.435971	-1.60852	-2.08123	-2.12968	5.80618	4.48682	4.73153	6.71433	6.85818	3.97339	4.7796	3.30071	5.26113	2.58526	5.63047	7.43855	6.51225	6.18156	6.37152	4.1979	3.83959	4.12777	4.17636	5.25189	5.76942	4.15078	4.08128	3.82318	1.99336
TP53	-2.79333	-1.42397	-3.00361	-2.97365	-3.95359	2.70247	3.06157	1.35382	2.13484	1.81845	1.01677	2.28961	3.07364	1.43952	1.93161	-0.731551	1.79018	4.99389	0.896739	0.566227	1.99602	1.59599	-0.0899354	1.18702	2.12073	1.46811	2.91601	1.76043	3.51274	3.28108	1.96807	-0.599382	1.93841	1.74062	2.04582	2.78719	2.28122	3.27055	2.5676	1.44578	-0.471525	1.09808	2.32794	1.15322	3.62069	0.398693	1.39908	1.91538	1.92526
TP63	-1.45163	-0.974292	-1.5486	-1.82383	-1.7667	0.646226	1.23547	0.891349	0.772443	0.979096	0.260585	-0.0200181	1.06643	0.15544	0.662758	-0.814268	0.153629	0.736589	-0.217926	0.358964	0.687521	-0.297727	-0.637646	-0.2586	0.760735	-0.0596657	0.523178	0.852662	0.968358	0.869325	-0.256154	-0.339475	-0.254307	-0.672542	0.0565017	0.266356	0.0460284	1.2175	0.469812	-0.19093	-0.607591	0.388973	0.734996	0.448827	0.507587	-0.0880526	0.357834	0.69785	-0.289643
USF1	-2.54946	-3.10211	-2.52681	-3.13889	-1.10841	-1.02242	-2.18421	-1.48545	-2.19653	-1.21519	-1.69467	-2.86797	-0.588454	-3.03838	-1.28602	-1.1897	-3.26709	-1.14778	-2.55193	0.386888	0.591026	-0.401543	1.29635	-1.85317	-2.13228	-3.72881	-1.69447	-1.80868	-1.68808	-2.68228	-2.7309	-1.54621	-2.37198	-1.42752	-2.19722	-2.35649	-1.09739	0.532303	-1.95657	-2.57816	-1.78579	-0.176595	-2.43876	-2.56927	-2.40287	-3.8335	-3.34912	-2.07033	-2.50128
USF2	-2.15288	-2.56328	-2.40165	-2.60152	-2.97753	0.568303	0.359455	-0.0752928	0.492349	0.561999	-0.215327	0.139595	0.680533	-0.128579	-0.155744	-0.828015	0.00845859	0.834285	0.611815	-0.759179	-0.83442	-0.113918	0.72502	-0.755116	-0.182814	-0.645158	0.58413	0.119301	0.564182	0.00427317	-0.0273696	-0.155451	-0.63262	0.228384	0.0293282	-0.31688	-0.6047	-0.110592	0.192874	0.00764493	-1.03417	0.67093	-0.0753339	0.219607	0.320404	-0.639194	-0.539189	-0.0786656	0.24067
VDR	-1.36642	-0.755597	-1.2906	-1.34106	-2.29779	1.98093	4.36269	3.60421	3.09451	3.79837	3.49842	2.94782	3.43853	2.99383	3.48474	1.45452	3.29473	3.81504	3.24854	2.46397	2.79949	2.05482	2.24175	2.70562	3.9335	3.39877	2.63524	3.09811	4.44705	2.8866	3.33819	3.27166	3.00454	3.11685	3.18846	3.65141	3.35228	3.49563	3.62874	2.89443	2.84039	3.22595	3.74908	3.02373	4.17078	3.05289	3.4674	2.85243	4.1083
WT1	-1.06442	-0.590313	-1.09834	-1.15098	-2.24448	1.1616	1.6406	1.30536	1.04931	1.40475	1.36365	2.05234	1.49808	1.36912	1.54796	0.531664	1.65351	3.02002	2.30199	0.325181	-0.687646	0.884459	-0.498396	0.395441	1.44632	0.690152	2.37877	1.8203	3.51668	1.66695	2.07374	-0.581371	1.89725	0.949545	2.19258	2.1666	1.98752	2.15744	2.16821	1.77116	1.27543	1.01955	2.05282	2.00612	2.97427	1.41764	0.641776	0.880206	2.20241
YBX1	-2.66452	-2.03205	-2.55387	-2.43889	-2.63763	0.105737	-2.75376	-2.70072	-2.72861	-2.8341	-3.11928	-3.487	-1.25564	-2.73774	-2.54594	-0.549504	-2.61908	-3.45295	-4.4323	-1.15317	-0.194727	0.361825	1.02416	-0.151162	-3.29701	-3.88368	-4.11226	-2.61996	-1.22471	-3.93649	-3.55268	-3.37649	-3.3251	-2.28523	-3.51383	-2.78358	-2.3169	-0.337477	-3.06116	-4.14033	-3.9264	-2.53358	-3.14198	-3.69187	-1.01819	-5.0477	-3.70475	-2.73907	-3.12695
YY1	-4.86513	-4.40611	-4.35425	-3.68124	-1.07404	-4.42164	-6.67891	-5.65106	-7.37399	-4.69677	-5.42523	-7.84866	-4.28283	-5.84311	-4.85544	-5.98798	-7.80703	-6.64357	-8.47766	-4.26001	-4.21668	-5.34561	-4.60716	-5.30956	-7.09839	-8.96084	-6.60558	-5.51276	-4.90955	-7.92145	-8.72902	-6.33418	-6.75479	-5.01694	-7.13225	-5.41735	-5.36555	-2.40307	-7.79557	-7.88982	-6.17797	-5.06416	-6.42304	-7.89249	-6.50177	-9.52761	-7.07295	-6.3363	-8.40189
ZEB1	-0.209986	-0.381271	-0.334604	-0.292989	-0.694506	0.410456	0.903174	1.35529	2.12163	1.01294	1.59568	1.41187	0.816088	2.19134	0.812585	0.591911	0.70244	0.848411	1.18763	0.756988	0.736149	-0.351758	-0.500987	-0.300115	1.76967	1.96873	1.39312	1.22557	0.639577	1.2699	0.946103	0.931054	0.734984	0.828871	0.894057	0.353677	0.781813	0.520094	1.57673	0.93006	0.517825	1.40421	1.42158	0.737145	0.587077	1.13692	0.899097	0.588166	0.655241
ZNF263	-1.12868	-1.09688	-1.20999	-1.05663	-1.15331	-0.340696	0.575737	0.415551	-0.246692	0.163541	0.511666	0.49393	0.213561	-0.143974	0.390247	-1.34466	-0.396774	0.955664	0.725194	0.0637705	0.311744	-0.767562	-0.579068	-0.907031	0.198289	-0.558068	1.1572	0.433696	1.01204	-0.208391	0.279541	0.318961	0.114878	0.870339	0.518275	1.51078	0.508618	0.424673	0.209612	0.0231863	0.209202	0.392923	-0.0543278	0.747709	0.0626782	-0.535778	-0.167205	0.0970374	0.0408457
ZNF423	0.714482	1.33979	0.793361	1.12634	2.43697	0.63479	1.41385	1.31529	1.07106	1.52339	1.70948	1.64032	0.942303	1.20153	1.9103	-0.114583	1.42739	1.51376	2.04733	1.22506	0.676589	0.758292	0.408881	0.372231	1.17804	1.17685	0.961766	1.60934	1.57532	1.36381	1.09436	0.945392	1.81013	1.18892	1.19161	1.67592	1.05761	0.966374	1.72695	1.05269	1.41374	1.85044	1.2039	1.36639	0.984469	1.0032	1.28155	1.53812	1.80938
[truncated: 5,000 more columns]

## Sheet: table3B
Table 3B. Sample-level activities in cell lines
	1287381	1287706	910697	910851	910925	906803	910944	906765	1290722	910687	910705	753531	753532	753533	910919	910918	906763	753616	906746	1290724	1240122	906695	924105	910710	910700	687505	910850	687506	753538	924107	906827	924108	906824	1240123	905952	910688	910568	910853	910941	1290767	1290768	1303912	1240124	910951	905961	910569	906815	906812	1297438
AHR	-0.389326	-0.788818	0.763664	-1.05226	0.390582	-1.56832	-2.09043	-0.48056	0.699694	-0.769066	-2.98318	1.92054	2.19527	1.50947	-2.53621	-2.50189	-1.48917	-0.86673	0.513331	3.23063	1.94578	-2.26681	1.80322	-0.953095	0.532312	-2.18111	-1.01559	1.96415	-0.916816	2.36614	1.45887	2.38082	0.234325	-1.42044	-2.67768	-2.23014	1.85244	-0.189404	0.359532	2.28985	1.84446	2.12731	-0.207517	-1.79586	-2.10018	-0.930557	-1.26806	0.0663216	0.497062
AR	2.66704	3.65549	-1.18987	-3.84072	0.193037	5.43227	-7.12403	-1.83771	6.1776	-3.81617	-8.83996	-0.0727421	6.19201	4.52503	-5.49968	-5.97163	-8.13921	-1.19582	3.35987	7.95921	-1.21454	-4.12163	0.56116	-5.53986	-0.879158	-6.78507	-1.88545	0.398782	-1.40818	5.65973	8.47769	2.67937	-0.33216	-7.77242	-7.1492	-2.63086	7.68536	3.66067	-1.93823	8.57025	8.87004	6.76867	1.6991	-5.72087	-3.76846	-0.535259	3.69736	1.83265	-3.9697
ARNT	0.0456443	-1.46302	-0.458544	-0.64087	-0.116923	-1.78342	-1.28212	-0.00419233	-0.0708722	-1.89717	-2.11747	0.253709	1.47604	-0.310515	-1.06834	-1.74246	-0.950188	-0.636796	1.09025	1.32283	0.512181	0.239067	0.29422	-1.25092	-0.999499	-1.59015	-1.70422	-0.777021	-1.91011	1.62738	0.303382	-0.73286	-1.22977	-1.6769	-0.493512	0.214102	1.38324	-0.717584	1.03493	0.696872	0.581906	0.951567	-0.0674253	1.11997	0.514776	-1.76887	-0.673762	1.39938	0.798654
ARNTL	0.11922	-0.405296	1.36065	-2.07256	1.56993	-0.199497	-1.25489	-0.519431	1.81715	0.139228	-0.997255	3.61638	-0.365792	1.49508	-0.232759	-1.33243	1.01573	1.07753	1.49205	-0.775371	-0.640348	-0.410057	-0.467605	0.32297	-0.109002	0.319992	0.0618244	0.518031	1.10335	2.40563	0.291065	0.181324	0.474693	-2.27386	0.536015	1.04428	-0.866763	-1.85142	-0.356243	0.95343	-0.236598	-1.06563	0.698499	1.23147	0.926396	1.32868	-0.720296	-0.0682762	-0.290161
ATF1	0.743446	-1.08491	-1.60813	-2.19401	2.04963	-0.426498	2.30536	-0.208595	0.152934	0.0479548	-0.680208	-1.15883	-1.27139	-0.842299	0.25003	0.119851	1.57727	0.899112	-0.872474	0.518163	0.50024	0.449407	1.7531	1.17464	-0.626482	1.30934	-0.812243	0.247149	-1.09892	0.228554	1.65665	0.13862	1.54529	-0.969794	1.58683	-0.951853	-0.205479	-0.383735	0.177466	0.21074	-0.908619	1.368	-1.86364	-0.347634	-0.993642	-1.02888	1.49958	0.650229	-0.270246
ATF2	0.140259	-1.53362	0.707885	-0.87907	-0.50501	-0.796031	1.20762	0.0680737	0.162279	0.615377	0.302507	1.11859	-0.701491	-0.554183	-0.489317	-2.45017	2.16426	-0.788414	-1.26085	0.0627665	0.565799	0.549112	2.33346	1.42414	0.964356	-1.51873	0.978442	0.845163	0.284167	2.22651	0.687536	1.15056	0.649449	0.232061	1.56439	0.686022	-0.776301	-1.86535	-0.82176	0.839143	-0.299325	0.221264	1.20681	1.39795	0.369371	0.1846	0.746219	-0.301703	0.32297
ATF3	-0.570727	1.09738	2.93663	-0.731519	2.89912	-0.349477	-0.96719	0.73825	2.54117	-0.532839	-0.936758	1.52289	0.718571	0.502408	2.15936	-1.19505	-1.38635	-2.75404	0.748251	1.7243	0.121838	2.16014	1.27693	-0.714273	-0.79589	-2.4302	0.239973	-0.702553	-2.26494	0.210695	2.49969	0.379242	2.80161	-3.72838	-1.74933	2.30157	-1.19397	-1.64158	-2.0716	3.21261	2.59221	2.57564	0.287799	-1.5202	1.57006	-1.34611	-0.381535	-2.58935	-1.35734
ATF4	2.15403	0.610159	0.755491	1.57233	0.655003	0.630429	-0.692653	0.232321	1.38614	0.00355631	-0.0960513	1.43073	-1.0178	-0.310223	-0.151462	-1.62529	-0.163107	-0.0443897	2.315	-0.0903667	0.217129	-1.3499	-0.344828	0.147322	0.33578	-0.848361	0.251647	-1.62882	-0.224085	0.507146	0.850054	0.329993	0.918869	-0.872096	-1.84337	0.740857	1.96641	-1.84607	-1.55141	0.896246	0.137572	-0.0209856	0.385991	-1.49149	1.44877	0.436723	0.68852	-0.0576079	-1.53274
BACH1	-0.435797	-0.031176	0.00959642	-0.44902	0.558282	-0.170494	-0.547001	-0.401288	1.39452	-0.618312	-0.515949	1.36245	-0.229109	1.69067	-1.05062	-1.04605	-1.85035	0.489676	-1.3005	1.85809	-0.785391	-2.15376	1.3581	-1.88152	1.31727	0.434616	-0.95998	-0.0718864	0.539731	0.0682982	0.842617	-0.981478	0.109944	-0.899216	-0.719731	-0.309583	2.36381	-0.631566	-0.0620212	0.94265	0.159823	0.761864	-0.7823	-2.19108	-0.580205	0.206171	0.354769	-0.373549	-0.0464437
BATF	-0.751147	-1.17116	-1.09394	-1.00117	-1.94247	-0.318955	2.69417	2.5863	0.370576	1.26382	3.23472	-1.62606	-0.253326	0.016307	1.23038	0.0598877	1.33503	-1.36457	-0.206785	-0.125282	-1.20978	2.04473	-2.30538	1.75704	-1.41385	-0.116705	-1.56254	-0.976807	-0.324332	0.240812	0.939726	-1.77098	-2.0638	-0.909386	2.20466	2.74528	0.798921	0.240541	-1.06053	0.782488	0.949969	0.448219	0.117862	2.05248	-0.82073	0.868045	-0.0153072	0.190037	0.562748
CDC5L	-0.487208	-1.3731	-0.203296	-0.195829	0.414795	0.798145	1.95884	1.54109	0.288031	1.55961	1.39999	0.0146843	-1.46544	-0.325694	2.00854	1.36685	1.2131	-0.900747	-1.52179	-2.77095	-1.4432	0.658082	-0.775915	0.976812	-1.32652	1.25844	1.40695	-0.0641325	0.905146	0.0575836	1.69084	-1.20157	-0.50372	-2.44496	1.73968	0.867797	-1.37398	1.58834	0.46804	-0.549291	0.334021	-0.549893	-0.888808	1.41733	-1.49645	0.0628282	-0.540391	1.35951	-0.0837303
CDX2	0.261541	-2.30878	-0.450776	-0.51465	0.890457	-1.42928	-2.74002	-1.97692	-0.486396	-1.02385	-2.97584	-0.180701	-0.374361	0.00737296	-2.16348	-2.28208	-2.10935	-1.04582	0.490082	-0.595257	-1.22786	-1.19447	0.240852	-1.91796	1.8159	-1.72264	0.548588	-0.379682	-0.695147	1.26018	-0.562157	0.892807	0.247093	1.3601	-2.50392	-0.846409	2.14092	-1.43416	-0.736691	0.587698	0.863727	-0.845918	3.23248	-1.20156	2.32355	-1.10074	-0.081345	-1.59184	1.15482
CEBPA	0.675539	0.0312836	-2.4367	0.267305	-0.25634	0.766873	1.14969	0.741972	-0.979367	-0.164233	-0.0778274	-1.86913	-0.291416	0.75507	0.414325	-0.857597	0.618925	0.938184	0.162415	0.33922	0.75025	1.06576	-1.77405	0.624822	0.413413	-0.415939	2.34714	-0.820319	-1.15718	0.685756	0.425636	-0.711072	-1.25274	-0.406661	0.787215	1.31184	0.041096	-0.440205	0.624904	0.508642	0.313908	0.180554	0.291713	0.950605	-0.38793	-1.04052	2.15107	-1.63812	-0.0436636
CEBPB	2.23897	-0.964064	1.00611	1.58949	0.79632	-0.473515	-1.86303	0.979108	0.0810641	-0.0215187	-1.52416	0.944617	1.91616	0.169969	-2.30418	-3.06363	-0.673618	-0.790274	0.708331	0.773361	2.4178	-1.03681	1.47452	-1.16881	1.50899	-0.945783	1.79615	1.30744	0.813399	1.18299	0.0474518	1.46062	0.780285	-1.5422	-1.25723	1.3393	2.08495	-0.977513	-1.45922	0.187771	0.498189	-0.423085	0.29283	-1.07378	-0.13279	-1.80932	0.087546	-0.932344	-0.906273
CLOCK	0.661462	-0.271883	1.423	-1.77781	1.52249	-0.243336	-1.05517	-0.9922	1.80516	0.299837	-1.44645	3.21301	-0.186884	1.84948	-0.572184	-1.33238	0.970472	1.40461	1.42667	-1.13248	-0.237992	-1.09951	-0.876992	0.121244	-0.344153	-0.479714	0.567611	0.869217	1.20226	2.28701	-0.107892	-0.038989	0.157952	-1.61564	1.02448	0.735516	-1.11195	-1.8363	-0.390276	0.373256	-0.425838	-1.92573	1.03472	1.52826	1.39751	0.794228	-0.604017	0.712757	-0.161227
CREB1	0.594969	-0.787052	2.2482	-0.731011	1.47898	2.4737	0.516948	1.77907	1.59901	2.17089	1.10922	0.750085	1.61348	-1.6676	1.11924	-0.26441	2.2206	0.558644	-2.27809	0.641495	-0.0278148	1.71632	-0.237756	2.07698	-0.663502	2.59319	0.208079	-0.965476	-0.72899	0.0164259	2.74934	0.0159023	2.15885	-1.02496	1.85258	0.45715	0.963975	0.44169	-0.879129	-0.152867	-1.70311	-0.316883	-1.66677	1.16419	-1.17642	-0.2397	0.568626	-1.01395	0.97576
CTCF	0.574688	0.584091	1.48061	-2.0202	2.28331	-1.59303	0.326093	-0.405457	1.38243	0.872202	-0.342815	1.29672	1.62107	-0.149034	0.0545509	-1.45076	-0.674819	-1.08306	1.66919	0.517061	2.42498	-1.57902	0.576157	-0.104965	0.897739	1.35099	0.645766	0.513131	2.68493	0.855964	-0.0129413	1.45203	1.41641	-1.00259	-1.32022	0.920815	0.855456	0.22593	-1.90727	1.0735	0.852378	0.306973	-0.880504	0.172121	-1.99036	-0.867668	0.538671	0.384587	-3.31733
E2F1	-6.23968	3.77957	-9.69969	-1.8572	6.7283	-4.67433	8.35697	2.02758	-3.65484	3.38976	4.21189	-9.45808	-12.0905	-4.85744	-3.28666	2.24447	7.35541	-8.25067	-13.9946	-1.09354	2.52581	0.0269545	2.32694	7.74028	3.47983	3.35876	-3.87763	6.67371	-4.44523	-1.89753	4.81109	1.2662	6.7846	4.68672	10.8416	-10.3659	-8.19157	3.05965	-0.910547	-5.82256	-9.18207	-1.61621	-4.36671	-1.67443	-2.01552	0.980083	-0.033044	4.62411	3.56676
E2F4	-11.1794	3.43406	-9.64364	-4.42887	7.98683	-3.88904	11.5531	4.65604	1.56649	5.37848	7.9131	-10.8236	-16.0594	-5.54423	-2.5348	3.22675	13.4579	-8.21355	-19.1301	-0.734745	2.42602	2.86478	1.18593	12.9205	2.47844	5.36281	-5.17699	5.03016	-7.1188	-5.25601	8.88274	1.15294	6.06233	4.22757	15.5947	-12.3349	-9.49301	5.58404	-2.31842	-4.43236	-12.7594	-0.27893	-5.5193	-0.0145981	-2.68972	1.50405	-0.2107	4.10099	3.90154
E2F6	0.981852	0.343376	0.577015	-1.05133	-0.777	0.249408	1.45689	-0.0114092	-0.88081	2.31371	0.986802	-2.07115	-0.710066	0.236766	1.10542	1.07642	1.48637	-0.152155	-2.24258	-1.85278	-1.4822	0.150714	-0.433815	1.56147	0.134942	2.35751	0.496632	0.735378	-0.559716	-0.816253	0.00153483	-0.675495	-0.580908	1.9623	1.28845	0.156184	-0.505206	-0.479804	0.748553	-2.75183	-0.26144	-1.38774	0.412352	1.122	0.847428	-0.88004	0.610501	1.26612	-0.504743
E2F7	-2.24338	0.967688	-3.07221	-1.04311	1.88442	-0.928666	2.85061	1.65587	-1.6343	1.5342	2.2862	-3.22071	-4.36326	-1.33213	-1.36253	0.48085	2.29199	-1.96441	-3.92131	0.219013	0.734563	-0.25069	1.45044	2.681	-0.629489	-0.574113	-2.80917	1.13642	-1.74337	-0.693166	2.33066	0.79797	1.23333	1.54177	3.35926	-4.00527	-1.75126	2.44301	1.09208	-1.29914	-2.4965	-0.41465	-1.57065	-0.105315	-0.266256	-0.341259	1.19389	0.682631	0.802755
EBF1	1.70581	-0.225209	0.606874	-0.222426	1.06704	-0.239349	-0.862098	-0.267216	-0.998739	-0.662127	-0.0195016	0.879011	-0.00202377	-1.09034	-1.23565	-1.8829	-0.388914	-0.492959	-0.823458	-0.701303	1.6008	0.250683	1.35114	0.555061	-1.35456	-1.09972	-1.40754	1.38332	0.269042	2.18005	-1.07693	0.911438	1.6583	0.685917	-0.897088	0.741256	-2.21894	-1.83258	-1.4955	0.224992	-3.21202	-1.31327	2.53796	-0.880396	1.00581	-2.88685	0.143615	-0.220204	-1.12449
EGR1	0.109005	-0.574701	-1.70646	1.31183	-0.466668	-2.68717	1.91168	-0.22807	-0.948822	-0.484574	-0.228634	-0.0650455	1.24354	-0.66243	0.107329	-1.50999	-0.370941	0.618875	-1.13215	-0.901221	-0.622811	0.0580404	-0.423014	-0.301134	0.692532	1.30127	2.39611	0.117309	0.310326	0.902847	-2.03354	0.119883	-0.255416	0.971889	0.302943	0.618592	-1.30477	-1.02488	-0.608715	0.693079	-1.46724	-0.923749	-0.675833	0.849498	0.663306	-0.48197	-2.21905	0.0864015	-0.811352
ELF1	0.59538	0.815751	2.0569	-2.77966	2.24545	2.35043	2.46941	0.606232	2.46542	2.44719	0.685446	0.941091	-0.718493	-0.984492	1.54079	1.92777	1.94376	-3.47825	0.308592	0.98019	0.15213	3.38546	-1.86465	1.52378	-1.94502	-0.0608129	0.466998	-0.31603	-2.2827	-0.0542285	1.25333	-1.19012	0.844599	1.46212	1.95626	1.31585	-2.3066	0.551936	-4.19517	1.73894	-1.57765	1.02461	1.16977	-0.205663	2.13504	-0.772173	1.06641	-2.84488	-0.118761
ELF5	0.445882	1.27383	0.13941	1.11149	-0.895927	-0.0471423	0.263738	0.243155	-0.580602	0.138258	1.26716	-0.442669	-1.15497	-0.679805	1.40128	0.847985	0.637725	1.0665	-1.27987	0.662595	-0.613728	1.07744	-0.962671	0.85535	0.629324	0.167335	-0.378184	-0.522179	-1.12347	-1.0571	1.87923	1.2816	0.298551	-1.2067	0.624942	0.348404	-0.678255	-1.10411	-2.08346	-0.211868	-1.22234	0.805821	-0.418984	0.181137	0.848175	-1.19836	0.371509	-0.966076	-1.76574
ELK1	0.940604	0.963219	1.36728	2.04657	4.83918	0.0212547	0.315417	0.333647	2.83044	3.01731	0.84842	-0.531269	-1.3752	-3.61148	1.92544	-1.24927	3.14938	-1.52612	-3.05006	0.342203	2.72972	4.01513	-1.21458	2.69814	0.591391	2.07439	1.23001	-1.19837	0.0309654	-0.995648	3.17884	0.736462	0.397238	0.589187	1.55718	-0.308618	-3.13165	-1.94425	-2.61086	-1.16522	-0.985677	-1.75682	2.0076	0.383851	2.44577	0.6774	-0.401611	-0.973069	-0.992923
ELK4	0.524752	-0.202052	0.65798	1.7751	2.65744	-0.513658	-0.794174	0.766902	1.54931	1.07266	0.859858	0.437564	-0.944262	-1.66498	0.805869	-0.332614	0.188502	-0.384705	-1.34127	-0.903257	-0.00762347	2.22127	-0.0001864	0.162392	-0.157362	1.10924	-1.32577	0.183813	0.703194	2.16917	1.42439	0.503635	1.36934	-0.0862787	1.15093	-0.80597	-1.59092	0.083683	-1.80846	-0.166921	-1.33659	-0.29102	1.16718	0.0386427	-0.595229	-0.384924	0.562606	-1.01011	-0.336431
ERG	-1.04075	0.368259	0.823515	-0.836553	0.0403301	-0.516784	0.542514	1.46023	-0.903524	-1.73621	0.520237	0.124459	0.0525697	-1.30981	0.392362	1.98385	-0.403746	0.0500418	-0.188034	-0.659775	0.29503	0.020169	0.556078	0.486402	0.41217	-1.8782	-0.0457791	-0.153782	0.37477	0.608241	-1.21781	0.17834	-0.0491479	-0.838352	-0.384059	1.34197	1.59092	-0.278259	1.12239	-0.602104	1.63664	-0.616161	-0.375632	0.688131	-0.307543	-1.17049	0.249184	2.39963	1.25508
ESR1	1.71933	1.10244	0.898097	-1.58386	1.96958	-1.06709	-1.95914	-3.76751	-1.43732	-3.6015	-4.32494	2.88966	2.82437	3.01818	-4.66763	-4.2128	-4.71812	-2.03556	1.36626	1.15735	2.17767	-5.49954	1.51824	-2.77198	1.49545	-5.04517	-0.223782	3.2545	2.45564	5.74385	-1.95245	2.99967	1.31428	-2.1423	-5.45519	-1.86455	0.834229	-0.386877	-2.36588	0.373326	1.47386	-1.8426	1.93782	-1.86511	1.04691	-1.28751	-0.225961	2.33978	-2.4866
ESR2	1.0693	1.5601	0.719897	-0.325503	-0.121758	-2.52962	-0.523095	-3.5626	-1.35972	-3.38006	-2.42592	1.8544	0.47039	2.55936	-3.28818	-4.44472	-2.93867	-0.642057	1.07089	1.20984	1.0449	-3.8055	1.097	-1.26448	1.89506	-1.97745	1.49564	1.74238	1.781	2.33997	-1.78859	2.79186	0.168804	0.312201	-3.40771	-0.926964	1.02166	-0.203441	-1.11344	0.495759	1.43397	-2.47034	0.891184	0.0433385	1.00326	-2.00363	1.76261	2.77538	-2.08424
ETS1	5.47852	1.98532	2.90318	-4.07628	5.57763	-1.13647	11.6307	4.6294	5.73789	7.811	6.93845	-4.62323	-5.17814	-12.7754	14.3217	6.7119	12.2236	0.0207081	-11.3397	-5.10419	-3.84104	14.2207	-11.2975	11.8972	-1.62169	12.0569	4.63805	-4.12037	-6.5153	-11.3069	9.74062	-6.00456	5.15133	4.16272	12.8907	1.22686	-11.2808	-1.07444	-2.98442	-3.27977	-9.73508	0.642929	-0.159623	0.817489	7.69696	3.62347	0.0407818	-4.47371	4.81419
EWSR1-FLI1	-0.771764	-0.970994	-0.806033	-0.379055	1.48223	-0.357635	-2.01509	0.143437	0.670764	-0.139347	-1.21798	0.124263	-0.353074	-1.23756	-0.23676	1.08805	-0.584433	-0.541889	-1.56637	1.84572	0.629676	0.445572	0.608184	-0.95739	-0.584246	-1.22913	-2.22936	-1.33509	-0.502699	-0.0660605	0.573531	-1.54285	0.985519	-0.766743	0.0133052	0.59552	0.350716	1.31646	0.240042	1.51003	1.79963	2.71438	0.661578	-0.375272	-1.22481	-0.432206	0.174745	0.791176	0.78279
EZH2	-0.312652	0.138293	-0.675756	-0.611936	0.896002	-0.595023	2.60825	-0.298405	-1.18603	0.16254	-0.0644281	0.395583	-1.79111	0.925159	0.0524612	1.74684	-1.1237	-0.0789451	0.874788	-0.614597	0.0600313	-1.21991	0.581399	0.567132	0.790535	0.0637306	-1.30586	0.878073	-0.50217	1.38123	-0.90877	0.240582	0.530694	0.0152925	-1.33883	0.359181	-0.259508	-0.0128298	-1.19512	0.337631	-0.43665	0.00229301	-0.547496	-0.0787971	-0.509778	-0.56016	-0.31311	0.515019	-0.307313
FLI1	-1.16287	-0.100727	-1.954	-1.78247	-1.65384	-0.553006	4.11915	2.86011	-0.750652	3.44603	3.12866	-2.01208	-1.41501	-1.43346	0.291819	0.887767	4.16507	-1.14875	0.316845	-0.549353	-0.500855	2.74201	-0.592156	3.72386	-1.33525	-1.14137	-1.39562	-1.68028	-2.34068	-1.21732	0.192594	-0.793356	-2.21227	-1.00126	3.58458	2.51522	0.823088	-0.887175	-1.7466	0.431455	0.762904	1.01435	-0.714524	3.28391	-2.04521	-2.41425	-0.228977	-1.35216	0.485213
FOS	-2.78251	0.8237	1.20204	-1.47139	1.03254	0.428539	0.911218	0.71635	2.38522	1.73148	0.366011	1.12438	-1.28857	0.0648678	-0.66788	-0.444194	0.681744	-0.848472	-0.537083	0.20278	-0.00970028	0.0038937	0.720385	0.435477	0.212	0.647571	2.19743	0.723609	0.961071	0.238469	0.841579	-1.93025	1.72034	0.0900869	0.905402	0.0348393	-1.14641	-0.753612	-1.15175	0.105102	-0.729698	-0.522191	-1.00177	-0.605588	0.351899	-1.13161	-0.164675	-2.32327	0.070638
FOXA1	3.22611	-1.69335	3.31841	-1.49458	3.24704	-0.706879	-5.0027	-3.24725	1.689	-3.85242	-6.69462	5.26596	4.07703	1.22118	-4.97002	-5.12828	-5.81141	-3.03627	0.489882	0.934455	0.628676	-5.86161	3.6265	-2.94705	4.90431	-6.7475	4.75707	4.26939	1.83592	8.4682	-0.733009	4.63282	2.13859	-1.23287	-8.30099	-3.32316	1.58065	-0.905921	-4.59295	1.41518	2.29642	-0.87546	6.08029	-3.5187	2.33288	-0.74225	-2.17054	1.5327	-3.01086
FOXA2	4.56334	-0.48948	1.33209	-0.59529	-0.740754	0.39514	-4.4992	-2.96282	1.49297	-2.81217	-4.83381	0.868646	2.59356	3.09899	-4.07982	-3.70707	-4.287	-1.18334	0.596297	-0.386579	-1.8903	-3.45472	0.00730634	-2.9221	8.07806	-3.38542	14.6198	-1.20029	2.43859	3.54283	0.265276	2.63743	0.167971	1.00228	-5.84606	-2.85728	1.48326	-1.35605	-2.22043	-1.1126	1.19764	-2.24883	5.51846	-2.65741	4.87456	0.454759	-1.92072	-0.741597	-1.59685
FOXD1	-0.304571	-0.166212	0.26628	-0.253761	1.32927	0.466373	-2.11295	-2.11546	-0.583913	-0.916941	0.117361	-0.172265	-0.253082	0.43871	-1.26516	-1.2173	-1.14592	-0.572857	-0.701867	-0.023912	0.735767	-3.14608	0.629891	-2.09883	0.627897	-0.000227484	-0.508434	2.21806	-0.452794	0.0442298	-0.436149	1.06501	2.50642	0.522655	-1.44299	-2.37493	-0.769601	-0.166454	-0.194386	0.133233	1.27337	-0.238698	0.0261092	-1.38696	0.419625	-0.993303	1.89164	0.305035	0.383984
FOXF2	-0.399269	0.964956	-0.715689	1.07115	-2.91232	-0.798332	-1.37732	-0.248753	0.666226	0.851481	-0.208155	-1.05631	0.463228	0.537188	1.26613	-0.566865	-0.690234	0.198254	1.18284	-0.0489435	-0.724442	-0.873344	-1.69152	-1.03818	1.65266	-0.850808	-0.363236	-0.970433	-1.12925	-0.163712	-0.0398666	0.137216	-1.4768	-1.23895	-0.218548	0.369275	3.15768	0.83519	-0.200574	1.26546	0.0293535	0.747647	-0.0502497	-0.508749	-2.49367	0.150936	1.78528	0.293949	-1.29823
FOXI1	-0.0642385	0.683649	-0.50932	-0.850774	-1.13504	0.165034	0.555256	-0.80121	1.79072	0.205926	-0.484948	-0.589949	0.220495	1.65756	0.781901	0.066232	-1.09173	0.531788	1.26495	0.31551	-0.862433	-1.32138	-1.61311	-0.317506	-0.911242	-1.67092	-0.871226	0.184353	-0.74948	0.646834	0.237063	0.19894	-0.194214	-1.27897	-1.35238	-0.501506	2.76599	-0.459529	1.26389	1.92189	0.646936	2.64176	-1.33368	0.180352	-1.68195	0.536754	1.03355	1.17315	-1.04836
FOXM1	-12.9821	4.40343	-10.8846	-3.09174	4.80553	-0.309713	5.13421	-1.15177	-0.252734	4.31197	1.79203	-9.00354	-12.9176	2.05128	-8.10188	0.0611668	4.53764	-4.74373	-14.2647	2.67933	3.83599	-3.39944	-0.499447	5.36462	3.40522	4.49581	-7.15395	4.90792	-8.79006	-4.82962	7.26862	2.43659	5.50232	1.02964	8.33668	-13.8576	-7.81315	4.35886	-0.0299239	-2.24319	-5.67121	1.56513	-5.88035	-2.80754	-8.31663	0.865977	0.708938	4.89211	3.37525
FOXO3	-0.131674	0.148616	0.802024	-0.582469	2.11331	0.598648	0.698446	0.385735	0.611201	1.50152	-0.00505634	1.22847	0.371136	-1.23994	1.12667	0.495131	1.41308	-1.49446	-1.30023	-0.074503	-0.382895	0.836513	-0.177938	1.4282	0.82676	-0.388203	1.39358	0.426238	-0.580161	1.67771	0.40718	-0.915444	0.210744	0.721096	1.38821	0.323247	-0.45656	-0.0172434	-0.991991	0.59575	0.82354	-0.495959	3.10962	1.94667	1.90647	0.432993	-1.10323	-0.647133	-1.63045
FOXP3	-1.5659	0.311191	0.12751	-1.95026	3.7911	2.62291	6.97045	6.78486	5.46117	9.4803	8.48716	-0.0462076	1.22401	-3.39297	7.15845	6.07319	11.066	-2.33764	-6.29365	1.28426	-3.77485	8.49541	-2.97549	8.42012	-0.0702482	-2.37852	0.852627	0.0428227	-2.27222	-1.08318	6.76112	-2.21106	0.986668	-0.452908	8.80159	1.5427	-3.82521	-0.670666	-4.89179	-0.522198	-3.00677	0.560909	1.25452	5.95157	1.85279	1.11867	1.4951	-1.3694	-2.90198
GABPA	1.96643	0.222692	2.96829	-0.839128	3.35507	-2.01754	1.27413	1.09646	-0.779602	2.24966	0.846043	0.167728	-3.04032	-2.57752	2.99176	1.24559	1.45324	-0.815174	-1.19526	-0.314325	1.79221	3.11723	-2.24633	0.84562	-1.0844	3.37355	-0.208668	-0.996015	0.169674	-1.93353	1.15393	-0.0770691	1.49818	1.22973	1.27804	0.585855	-2.98464	-1.4528	-2.32339	0.00325754	-3.40843	0.410602	0.0819342	-1.58254	1.15038	-1.89034	2.57845	-1.5062	0.962759
GATA1	-3.69724	2.80563	2.12202	-2.77025	1.38548	1.2763	4.60587	-0.165164	-0.0824225	1.95246	0.936054	2.88027	3.2972	1.68975	-2.70015	-1.90971	2.27661	-1.24159	-0.431254	1.74475	-1.72597	0.385387	0.384428	0.296699	0.66319	-5.49871	0.108381	1.31373	1.71096	4.35017	-2.56775	-0.815456	0.947428	-2.34079	0.971493	3.28397	1.48368	0.0291511	-2.6543	0.0939002	1.51167	-2.47883	2.09542	1.9515	1.45217	-1.61396	0.887187	0.47205	-4.63405
GATA2	-3.32856	0.536288	1.72716	-5.40693	2.13873	-0.0631807	2.09766	-2.16358	1.7842	-0.978562	-0.601262	3.57142	5.24375	3.08282	-4.26647	-4.48984	-0.139452	-2.18111	1.06671	2.87476	-0.942952	-1.14814	0.162523	-1.60534	2.47994	-8.40386	4.1708	1.76188	2.36557	6.87238	-1.26028	1.54834	0.19432	-1.9814	-0.783597	1.84703	2.86685	-1.99189	-4.3604	2.92808	3.14442	-0.341943	4.14305	2.31556	2.87596	-4.64002	-1.48823	-2.09377	-7.04111
GATA3	2.5948	-0.321441	2.59409	-2.03432	3.88331	0.241153	-6.32715	-4.12975	0.571877	-4.40235	-6.5605	4.71283	3.5058	1.10023	-5.64432	-6.328	-5.69948	-3.12303	0.0688566	2.25684	2.16441	-4.94606	3.71741	-4.50625	3.69853	-5.01054	1.44449	6.52855	2.66311	9.04905	-0.651319	4.4571	4.96146	-2.32167	-6.10418	-3.80486	0.463098	-2.70821	-4.21195	2.32921	1.91062	-1.06861	4.98712	-3.48292	1.44867	-0.766204	-1.48591	1.62823	-3.79195
GATA4	-0.440369	-0.536658	0.353572	-0.127369	0.383815	0.832663	0.504464	-0.200526	0.0503394	0.548882	-0.395066	0.35159	0.0954791	-0.90923	-0.471155	-1.73772	0.443933	-0.490517	-0.858872	0.142337	0.278875	-1.62849	-0.605199	1.61581	0.74025	-2.35443	0.782499	0.482158	-0.423478	0.399652	0.617204	0.105453	-0.718644	-0.0460972	-0.712347	-0.577765	-0.771562	-0.355816	0.276949	-0.231055	1.38697	0.862543	1.16569	0.855115	2.46288	0.774805	1.09914	-0.258578	-1.0577
GATA6	1.05201	-2.04802	0.362611	1.07269	2.3676	-1.37277	-1.78773	-1.17968	-0.65772	0.108996	-1.65649	1.37107	0.428767	-0.874766	-1.66597	-1.78239	-1.68006	-0.825924	-0.966507	-0.0442189	0.128886	-1.95761	2.27058	-1.74364	1.01807	-1.97781	-0.963881	1.68661	0.756517	1.70148	-0.352113	1.91951	2.62864	0.218153	-1.67886	0.064086	-0.297666	-3.11818	0.033777	-1.68222	0.592337	-1.50265	0.717148	-0.913744	1.86316	0.0353785	-1.0331	1.36282	0.231889
GLI2	-0.768198	-0.359481	0.423747	1.28474	0.654982	0.390587	-0.610411	-0.96961	0.788807	-1.01755	-0.478016	0.0429553	0.444566	0.917206	-0.377409	-0.348346	-0.98218	0.464026	3.37807	0.900462	0.874765	-0.115501	-0.217853	-0.53877	-1.38044	1.81145	-0.908583	-0.905401	0.7852	0.124284	0.0930436	-0.62979	-0.115857	-0.979241	-1.43824	-0.893628	0.852386	-0.0728301	0.0734396	0.0191713	-1.0218	-0.021384	-0.329102	-0.192868	-0.117566	1.85031	-1.29442	-0.378614	-0.550723
HIF1A	-0.351165	2.30004	0.644207	-0.339685	0.475995	0.754911	-2.46062	-1.98308	3.14446	0.562239	-3.50841	1.62952	4.17526	8.04531	-0.813756	2.29321	-1.53007	-0.939872	1.25633	2.41328	3.21883	-1.21679	-0.650051	0.345806	0.229086	-0.327791	3.08364	0.418354	-0.598084	-0.344066	3.06413	-1.04	2.59127	-2.44944	-1.06531	-1.77119	-0.151962	-1.07554	0.758204	5.48014	3.18277	3.29306	0.8197	0.777383	-0.910427	0.025982	-1.0668	0.0833567	-2.84361
HLF	0.36389	-1.47999	0.469631	-0.384219	-0.0996274	-1.51149	0.821728	1.5288	0.370348	1.02017	1.17127	0.41247	-0.0867855	-0.34704	0.731155	0.425562	1.34132	1.77036	-0.157922	-0.486741	-1.45849	-0.029953	-0.0970327	1.6901	-0.101424	0.894415	-0.105762	-0.385095	-1.00427	-0.472294	-0.805774	0.111287	0.215247	-0.325836	0.650525	1.13977	-0.110761	-0.293113	0.228175	0.304277	-0.390854	0.680067	0.528829	2.24857	0.541779	1.20112	-2.76875	0.373904	0.383445
HNF1A	2.66069	-1.56725	-0.0138911	-0.82967	0.828597	-1.49705	-1.25506	0.505347	-1.91055	-1.94431	0.616851	-0.960088	0.544668	2.58095	0.187896	-1.31327	-1.83113	-1.07128	2.42974	1.15456	-0.891767	-0.791788	-0.56763	-1.25679	3.79363	-0.0990878	4.26099	-1.47197	0.299854	1.1851	-1.17834	-0.7406	-0.62959	1.75895	-1.75136	-0.173599	-0.553113	-1.2001	-1.29043	0.197723	-0.24025	-0.328555	2.62208	0.0335591	1.83231	-2.56852	0.327571	-0.635978	-1.19902
HNF4A	1.48244	0.224341	1.37323	-1.53176	0.805413	1.07788	-1.11051	-2.13258	1.07789	-1.02339	-2.20454	2.35996	0.379184	1.32996	-2.34913	-2.40908	-0.107452	-1.39507	-1.0039	-2.67827	-2.08295	-1.92991	0.274208	-1.79603	11.1276	-3.42555	15.9664	-0.0602657	2.16781	2.92446	-1.66764	-0.0526645	0.358391	4.7043	-2.27949	-0.20129	-1.8262	-1.53298	-1.6462	-2.80299	-1.62955	-4.18286	5.15119	-1.44667	5.85072	-0.910086	-2.16508	-0.377316	-1.91806
HSF1	0.452941	0.504626	0.904402	-0.281417	0.635329	-1.84104	0.769164	-1.2022	0.188385	0.483978	-1.51684	-0.153606	-0.832037	-0.744519	0.620537	0.595394	1.16964	-2.69313	-1.22886	1.02935	0.124536	-0.811592	-1.48159	-0.15128	0.496107	2.17745	0.810523	0.194535	-1.42338	-0.900948	-0.900824	-1.25732	1.39008	0.846631	1.07456	-1.09343	-0.542688	0.168093	-1.20313	0.00167546	-1.35384	-0.289778	0.35256	-0.586666	0.118144	-1.49262	-0.64835	1.01838	-0.758834
IKZF1	-0.398713	0.184198	-1.00555	0.482267	-2.53139	-0.383774	1.37104	1.40547	-0.0885265	0.829965	1.22943	-1.4742	0.167849	-0.520931	0.894273	0.914528	0.36801	0.927999	0.110054	-0.833491	-0.888159	0.915387	-0.263145	-0.838523	0.277886	-0.840916	-0.248557	-0.93877	0.0995956	-0.615913	-0.664294	-1.74704	-2.32451	-1.14382	0.80399	1.81527	2.01791	0.65162	1.10859	0.0553625	0.480852	0.308286	-0.651305	2.3652	-1.1411	0.700758	-0.272999	-0.327777	0.74515
IRF1	-2.7348	-2.06701	2.01193	-2.44778	1.42086	0.406215	1.08106	4.49943	2.05233	2.78272	0.361382	3.43581	3.29197	1.55342	2.7198	1.58806	0.113002	-5.06577	2.76197	1.65905	-0.776081	4.96883	7.16658	1.1521	-0.332727	-4.35208	-2.78281	4.57028	0.825372	3.89431	-1.09761	3.6737	0.0231344	-4.83872	0.368575	6.63006	-0.801427	-1.66075	-7.03225	-1.65163	-0.547487	-1.23808	2.5157	0.595426	0.314254	-5.14248	-2.85071	-5.15232	-4.51015
IRF2	-0.85554	-0.631925	1.29795	-0.539214	0.27253	-0.290632	0.756601	1.75364	0.983204	3.21342	0.267435	1.21897	0.484824	1.57436	2.87007	2.53656	-1.00536	-2.23004	1.35868	0.501037	1.07253	2.22116	1.03747	1.20562	-1.16686	-0.3312	-0.47665	0.245504	-0.330569	0.853397	0.850452	0.853614	0.118722	-0.472787	-0.696607	3.04303	-1.37038	-1.21433	-3.4167	-0.681026	1.3691	0.0630207	-0.198515	-0.210374	0.227911	-1.70432	-0.804926	-1.82109	-2.19939
JUN	0.832659	-0.683573	2.71457	-2.77771	2.09782	0.0971872	-3.26135	0.839415	6.71728	0.203637	-4.02143	3.43648	4.78696	3.74305	-2.69596	-3.09093	-3.72982	-2.36831	2.13238	4.07664	0.796539	-0.0129053	1.40917	-2.35569	-1.57172	-5.12708	0.0648754	1.22613	2.68743	5.22054	4.2598	2.11844	2.87041	-3.73094	-3.22694	0.496898	3.98251	-2.8067	-4.81679	4.28203	4.33379	4.75378	2.44545	-1.91509	-1.87274	-3.41017	0.0592245	-3.68324	-4.12912
JUND	-0.105748	-1.19755	2.51504	-0.090413	4.79016	-2.49032	-1.45174	-0.453381	3.7086	1.07579	-2.79782	3.30442	2.86758	0.436921	-1.66615	-2.17355	-0.834456	-1.13358	-0.68979	3.53744	3.04484	-0.174113	0.865038	-2.00178	-0.109084	-2.38756	1.23442	2.35424	2.10455	3.51709	2.47256	2.04311	4.3968	-0.816302	-1.1363	-0.0296203	-0.0309147	-3.68279	-3.33355	1.36351	2.18946	1.42387	3.95854	-0.0535934	2.0692	-2.61088	-1.63538	-2.371	-2.09487
KLF5	-0.5816	-0.460306	-1.83043	-1.27281	-0.288748	-0.437597	1.74023	-0.0969373	-1.48058	-0.0509862	0.235188	-0.777707	-2.20236	-1.23973	-0.520135	-1.22258	1.30133	-0.929768	-0.367857	1.86246	-0.556757	-0.293633	0.379041	1.58281	0.590069	-0.756015	-1.9558	0.0282522	-0.860153	-0.223097	-0.416839	0.176711	-0.247833	-1.5328	1.385	-0.305224	0.998534	-0.259048	0.0827439	0.651998	-0.498757	-0.575319	0.000245596	0.432397	-0.749224	-0.377655	0.0449427	1.64668	1.00357
LEF1	2.25895	2.08009	-0.353892	-0.694673	0.940065	3.09119	-1.26997	-1.12499	0.0463529	-0.5685	-2.34622	0.231987	1.3024	0.842394	-1.14348	-1.43189	-2.35834	-2.01494	-0.196839	0.922274	1.33447	0.330866	1.3985	-0.836599	-0.187489	-0.207098	0.0192312	1.35637	-0.655807	0.892586	1.15557	1.27808	0.322821	-0.554998	-2.26962	-0.263302	-0.301696	0.885743	-1.02801	1.04149	1.02728	0.304619	1.37894	-1.8369	0.1995	-0.902429	2.50616	-0.335982	-2.40918
MAX	0.225957	2.57036	-2.03112	-0.00300198	1.11609	-0.214195	2.33497	1.15835	-1.3666	-0.299634	0.669942	-3.98219	-2.68634	-0.989772	2.09741	0.733115	2.16496	-0.49376	-3.13575	-2.41917	-1.34589	3.16777	-1.99629	1.84361	0.837045	0.697121	1.6731	-1.25169	-2.12209	-3.77397	1.25496	-2.73394	-0.0371326	0.795535	2.35756	1.41386	-3.36487	1.00468	0.0919827	0.323066	-3.34942	-0.699869	0.0527622	-1.1004	1.53769	1.77763	1.72756	-0.257088	2.73167
MAZ	-0.84729	0.586297	0.0654471	0.969236	0.744765	-1.29678	1.57672	-0.196805	0.522624	-0.123606	-1.31745	-0.600644	-1.27156	-1.78988	1.76626	0.185544	0.693694	-1.36851	-2.10634	0.200759	-0.87822	0.990458	-1.53252	0.899386	-1.61853	0.17529	-1.15698	-0.272887	-1.3296	0.728993	-0.808238	-0.535354	0.727231	0.0880879	0.713951	-0.634153	-2.18313	-0.963378	-1.62163	0.00930419	-0.882557	-0.231786	0.00629233	0.042027	-0.235694	-1.02355	-0.310939	0.554327	0.489741
MEF2A	-1.56288	-1.10653	-0.123213	0.718972	0.803668	-2.10389	-0.150199	1.04472	0.700996	0.979914	-0.0404939	0.338788	-0.709362	1.40422	-1.15362	-2.01982	-1.39191	0.609037	-0.339668	-1.139	0.79955	0.948668	0.190448	-1.15936	-1.31489	-0.449786	-0.919746	-0.492318	1.07026	1.23658	1.15927	0.807374	0.694288	0.869537	-2.53154	1.28353	0.896207	-2.50562	0.654539	0.55738	1.23909	0.54103	0.657463	0.123488	-1.32311	-0.227213	-0.781858	0.105382	0.984556
MITF	-0.213471	5.15943	0.804667	-1.94603	-0.204665	5.64587	-0.412832	-0.237454	1.21469	-0.23987	-0.458638	0.0542387	1.20884	0.822761	-1.05884	-0.518436	-0.977905	0.185043	1.54226	0.971145	0.937952	-0.427753	-1.02402	-1.0292	-0.323977	-3.50161	1.86962	-2.11937	0.314553	0.6771	0.516012	-1.87468	-2.11989	-0.42616	-2.18808	2.06775	3.20639	0.86773	0.502662	-0.662088	-0.202947	0.609653	-0.0140713	0.500006	0.149449	-0.0216956	6.25194	-2.17303	-0.434175
MYB	-0.069926	-0.543815	-0.241768	-0.794817	-1.74877	0.318404	0.139018	1.56475	-0.24609	0.781762	0.0899724	-0.756844	-1.04542	-1.67444	-0.85613	-1.71157	1.23087	0.650693	0.0192278	-0.107803	-1.05178	0.974751	0.301817	0.925031	-1.21549	-1.23093	-0.834561	1.65938	-1.05294	1.64408	-0.914201	0.288227	-0.748058	-0.791599	1.08475	1.4958	0.368061	-0.338051	0.0262485	-1.37969	-1.31506	-1.69998	0.0827375	-0.842137	-0.53937	-1.5552	0.475324	1.36115	1.24675
MYC	3.00853	5.32095	-6.8186	-0.0177651	1.90735	-6.50733	9.73296	5.53235	2.89439	5.39343	3.56332	-10.0445	-4.48346	-10.5108	4.81023	1.9024	5.2096	6.51555	-9.14534	-4.06283	2.22138	6.58874	-11.7622	11.7765	-0.71105	9.06438	6.06346	-2.40918	-2.34391	-10.8028	6.8125	-2.25437	4.25876	6.54877	6.11783	-2.32469	-6.70624	0.966209	2.74629	-3.16384	-7.79162	-1.819	1.13881	0.742464	-0.415463	7.05532	-1.55704	1.18397	2.95147
MYCN	-0.849904	3.21106	-1.46589	-3.16478	0.658444	-2.82169	5.0919	0.813065	-0.531957	2.25345	2.33851	-2.18147	-1.93325	-2.80516	2.29649	2.09528	2.24876	1.58898	-1.77735	-1.16154	-2.31839	-1.43913	-4.13596	4.16634	-0.701483	2.49481	0.145168	0.969498	-0.764094	-2.24766	-0.784152	-2.26808	0.65612	1.62726	3.83265	-2.02286	-1.35667	0.400277	1.80516	0.659564	-3.84863	0.134498	-1.09824	-0.279089	0.727019	1.0219	-1.60298	2.9712	0.379718
NANOG	-0.542754	-2.06441	-1.04022	-0.442525	-0.897359	-1.52909	1.1808	0.397647	-0.42277	1.27746	-0.721484	-0.454418	-0.320408	0.902324	0.557829	1.53218	0.207216	-0.584471	-1.20942	-0.410093	-1.02122	-0.380331	-0.0273669	1.033	-0.0192656	1.11819	-0.52666	-0.13096	-0.615776	0.226966	-0.30808	0.90122	-1.76707	0.729836	0.873603	-1.04988	0.742246	-1.74021	-0.800026	1.15939	-0.0780597	-0.129649	1.3113	3.02497	-0.990196	0.456878	-0.513933	-0.113527	-1.52865
NFE2	0.245465	1.7658	0.259853	2.60291	-0.456691	0.656608	-0.870548	-1.33391	-0.329532	0.521688	-0.761214	0.195575	1.54751	0.0817566	1.76581	0.957757	-0.0785002	-1.60198	-0.658681	-0.63459	-0.0398137	0.683449	0.272253	-1.34888	-0.777866	0.838889	1.39754	-1.14151	-1.0035	-1.14946	0.531709	-1.27812	-1.67124	-0.591936	-0.167463	0.519667	-2.25065	0.842278	0.736325	1.15502	0.0943219	-0.0813345	1.30726	-0.0612846	1.23422	0.226363	0.41068	0.00148145	0.910196
NFE2L2	4.94292	0.224952	-0.341573	0.545943	0.818115	0.442057	-1.38906	-0.335468	1.73962	-0.482445	-2.13597	1.3318	3.10682	2.02906	-1.28548	-2.14957	-2.91845	-3.25089	1.69187	4.00803	-1.52462	0.877388	-1.0941	-2.38893	1.1979	-2.93661	3.2513	-0.915564	0.123079	2.91431	2.0953	1.15271	0.390422	0.490026	-2.64862	1.16686	1.42053	0.0705812	-3.84334	1.86391	1.49406	0.0763694	1.25035	-2.61557	-0.00149751	-2.63632	0.70861	-0.736734	-2.97128
NFKB1	-0.518944	-3.51719	3.94475	-0.64302	3.01772	-3.44036	-1.11159	7.74747	1.72985	2.73261	1.57231	4.22575	3.12377	2.82084	0.638375	0.556762	-3.45352	-3.13348	0.805713	0.056038	1.87337	5.02138	5.00004	0.0826793	-0.882315	-4.89571	-2.42951	4.81885	1.16498	7.17515	-1.3294	5.06799	3.16814	-3.56212	-3.24911	9.09151	0.331533	-6.6327	-4.91127	-2.54998	0.480217	-2.38777	2.53881	0.353147	-0.298802	-4.44964	-3.1334	-4.41076	-4.09736
NFYA	-2.02963	0.169082	1.64084	-2.63799	0.845757	-1.90584	1.01184	0.234196	0.238895	-0.614654	1.87354	2.15051	-2.45959	-1.50082	-0.844022	-0.449434	1.59425	0.44119	0.96247	-0.403206	1.56014	0.0628079	-0.0494143	0.983114	0.778931	-0.962387	0.223457	-0.425718	-0.941846	0.0363659	-0.791649	0.639614	1.32882	0.784656	2.05299	-1.8213	-1.94189	-0.546551	1.31089	-2.1291	-1.49416	-1.84444	-0.0948234	0.965117	3.10045	0.840454	-0.485423	-0.0104236	2.69357
NHLH1	-0.744084	-0.47628	1.80947	0.697176	1.29941	-1.37892	-1.15903	1.26553	0.580376	0.240574	-0.211009	1.7264	0.852605	0.149099	-0.217846	0.562738	-0.299448	-0.583975	-0.60381	0.208271	1.15784	0.76885	0.560517	0.34787	2.0951	-0.767138	-1.50978	-1.0872	1.55845	0.936693	-0.588182	0.514232	-0.390084	0.219869	0.312371	1.6846	-0.0662013	-1.0417	-0.336268	-2.11443	0.336071	-1.23113	0.835261	0.486851	1.31752	0.677092	-0.687093	-0.278197	-1.20534
NR3C1	1.97686	-0.318322	2.30085	-1.08008	1.2237	-1.49068	-1.73894	-1.59216	1.24767	-1.10805	-2.72691	2.77313	3.11308	1.21046	-0.248753	-0.8529	-3.14175	-1.78895	1.05273	0.317333	0.683117	-1.71307	1.29105	-1.00856	-0.267199	-1.99324	0.300685	2.21157	2.24496	4.68472	0.293737	2.41006	2.22525	-2.64982	-3.15509	-1.36467	-0.497422	-1.41869	-2.88524	1.95744	2.16541	-0.717036	1.34238	-2.14965	0.683779	-1.24826	-0.712547	-0.3656	-2.91275
NRF1	-1.34144	0.984553	1.02764	1.03913	1.90126	0.490772	2.08778	-1.20855	0.842285	-0.670365	-0.546993	1.03967	-0.360798	-2.62911	0.988451	0.436968	1.27946	-1.12801	0.340346	-0.630513	1.12903	-0.811323	-0.325238	0.710039	-0.419569	-1.01361	1.99209	0.0584374	0.794538	-0.150848	-0.0232882	-1.72455	1.36601	-2.04326	1.41705	-0.507905	-0.69734	-0.49855	0.191753	-1.08121	-0.641234	-1.11757	-2.05284	-0.853343	-0.863461	1.21294	-1.5582	0.373768	1.21661
PAX5	-1.2018	-0.220824	0.998342	-0.354028	2.25442	-1.87073	-0.43433	0.337739	-0.583349	-2.15637	-1.36905	1.83363	-1.40053	0.59853	-0.982613	-2.63979	-2.17797	-0.395809	-0.431927	0.11006	0.914192	-0.82885	1.14233	-1.08362	1.08701	-1.27072	1.16469	2.42812	1.0928	2.12433	-0.439788	2.05724	1.95565	-1.15893	-1.74699	-0.385721	-0.325222	-0.204278	-1.2639	0.893631	0.644321	-0.564092	1.01267	-1.62693	1.16388	-1.23033	-1.47859	-0.682784	0.369805
PAX6	-0.0883703	-0.818606	-0.014024	0.692193	0.041888	-2.59381	-1.63909	0.267097	0.269108	-1.84063	0.0471014	-0.529179	0.222302	0.329533	-0.0837791	0.395201	-2.9358	0.617505	-0.0218532	-0.0377185	0.75843	-0.450409	1.40603	-0.931024	0.41281	0.240827	-1.73992	0.74523	0.327285	1.42492	-0.0938865	1.38028	-0.248936	-1.1715	-1.94728	-1.26538	1.06805	0.364587	0.886974	0.644699	1.29255	1.63046	0.347561	-2.23856	-0.824833	0.242173	0.0481938	-0.843203	-0.197697
PBX1	-1.27066	2.46672	-0.667792	-1.22732	-1.99526	3.29608	-1.54401	1.31506	2.21974	-1.41398	-1.17224	-1.46054	0.593306	-0.373878	-0.532221	-2.06798	-2.78193	0.798172	2.15662	1.91493	-2.27822	-0.884814	-0.549426	-1.02501	0.176961	-1.08955	-0.950962	0.0431545	-1.1074	0.502228	0.844685	-0.608504	-2.62111	-4.92759	-2.0263	0.139926	4.85466	2.66613	2.18285	0.55003	3.0741	1.2939	-2.2631	-1.29747	-3.83451	0.00940283	3.20738	0.912873	-0.588913
PLAG1	-0.392486	-1.58322	-1.02579	1.61717	-1.98915	-1.29651	-1.19675	-2.45922	-1.43731	-1.85995	-2.05641	-0.640888	1.74758	-0.562586	-1.62374	-1.53524	-2.48432	1.37735	1.19876	0.873922	-0.247424	-2.47668	1.32859	-1.17553	2.27607	-0.282844	4.13648	-1.48217	0.523001	0.326524	-0.307768	-0.11792	-1.48245	0.618563	-2.28741	-2.25683	1.96292	0.40901	1.11583	-0.412261	1.27151	0.180033	-0.673844	-0.700371	-0.484371	-0.764645	-0.4226	-1.09401	-1.21176
POU2F1	-1.45248	0.58115	0.874119	0.327596	0.962128	0.510883	0.448111	0.249032	0.530039	-1.78838	-0.871633	0.3538	-0.922653	1.53441	-1.51772	-0.586226	-1.11479	0.0748912	0.699547	0.423421	0.994462	0.880845	0.514108	0.376947	0.759016	-0.741201	1.12081	0.727502	0.626285	-0.0388697	0.665788	1.17062	-0.910645	0.0152409	-0.24639	2.34766	0.22535	0.108336	-0.755899	-1.11817	1.13479	0.288782	0.468729	-1.02373	-0.158322	-2.36434	1.05128	-0.0994414	0.784383
POU3F2	0.0582685	-0.614722	0.226848	-0.739391	0.251078	1.59304	-2.30307	0.466706	3.05572	-0.93257	-2.26437	0.840963	1.71351	2.05572	-0.861581	-0.625499	-2.32575	1.22045	2.10002	1.31768	-0.26953	-1.41221	0.18926	-1.87602	-2.07937	-2.04661	-1.46475	0.400538	-0.668992	0.702962	2.2889	0.782137	-1.25721	-2.64494	-2.33394	-0.688001	4.64216	1.47455	1.78906	3.19678	2.17646	3.12699	-0.403864	-1.94662	-1.9891	0.863325	1.23876	1.27319	0.43967
POU5F1	0.690395	-1.63091	-0.225945	-1.83451	-0.759958	-2.02718	0.655893	0.230427	-0.512963	0.299678	-0.578828	-0.0858828	0.151698	0.81648	-1.62841	-2.826	-1.46098	0.294167	0.843538	-0.122144	0.791585	0.372631	-1.26162	-0.11073	0.366538	0.169462	0.962454	-1.37247	0.998946	0.65183	-0.750172	-1.20057	-1.41528	2.04211	-0.328656	1.03109	0.384209	-2.02193	0.578022	-0.925127	-0.382186	-2.75572	1.15196	-0.766654	0.749763	0.00488655	-1.22925	-0.423349	1.52297
PPARA	0.244726	0.624105	0.222986	0.390752	0.728784	0.0192324	-1.4218	-1.08902	-1.42804	-1.33275	-2.33247	1.01499	1.53201	-0.667279	-1.88363	-1.04427	-0.990563	0.0728515	0.457746	1.06618	1.506	-0.494275	0.495961	-0.887293	1.66746	-2.02438	-0.867519	-0.184764	-0.345722	0.966274	0.754274	0.0932993	-1.24204	-0.625657	-1.89114	-0.524738	0.958924	-0.265811	0.205164	1.22287	0.748613	1.35258	1.00763	-0.796125	-1.44178	-1.23369	-1.22911	-0.154291	-1.47635
PPARD	2.09825	0.840279	-0.651973	3.43396	-0.797744	0.460297	-0.50987	-1.53443	-1.64822	-0.953479	-1.70858	-0.269281	1.12088	1.1583	-1.52905	-0.201752	-0.23834	-1.43793	1.86068	0.320351	-0.948362	0.0967363	-0.114385	0.0597516	-0.413638	-0.906084	0.994532	0.414535	-1.78038	0.873994	-0.196428	-0.786561	-1.25117	-0.552082	-0.984256	-0.243	-0.403859	1.08145	-0.755665	1.0877	0.924052	0.815668	2.20833	-1.13465	1.26137	-0.431685	0.330679	-1.8507	-2.79155
PPARG	1.23028	1.02476	0.699676	1.15582	0.00881891	1.77872	-2.09695	0.536411	0.621003	-0.863569	-0.923357	0.820772	2.97932	-0.0119737	-0.565448	-1.22352	-2.03915	1.14703	1.73701	-0.319001	-1.2601	-0.67515	0.254873	-0.368383	1.36443	0.175526	0.482267	-0.658304	0.0357601	1.71275	-0.0283113	-1.86548	-0.716447	-1.27983	-2.3615	0.870217	2.54978	-0.196058	0.168056	-0.0784416	1.36298	0.226631	1.05029	-1.66414	0.07033	2.27575	1.06739	-0.315535	-1.91031
PRDM14	-0.42491	-0.226251	-1.08831	-0.284488	-0.713567	-0.746298	-0.516637	-0.289549	-0.0356692	-0.143816	-1.31965	-0.386554	0.209881	1.75033	-1.30007	-1.64335	-0.337678	-1.81013	-0.122081	1.76868	0.190436	0.77107	0.688767	-0.687023	0.285928	-2.23198	0.475288	0.121278	0.0995827	0.276335	0.989885	1.00627	0.201728	0.251521	-0.668932	-0.725175	-0.287447	0.831196	-0.248846	-0.0548798	-0.207365	-0.776533	-0.524495	1.14554	0.571011	-0.738919	0.192752	0.200166	-1.84836
RARA	1.63702	-1.35434	0.731284	-0.909641	0.826203	0.0931644	-1.30226	0.352425	0.900111	-1.53545	-0.217008	-0.116483	-0.139284	0.212364	-1.3315	-0.721493	-1.42005	-0.19481	0.968329	-1.00184	-1.04006	-0.806537	0.947853	-0.742429	1.51106	-0.612438	-0.241428	0.468446	-0.716245	1.42162	0.505968	1.1557	-0.0908904	-0.470984	-0.594386	0.947074	1.21119	-2.15671	-0.349949	1.35848	-0.0489192	0.289349	1.47625	-1.40664	-0.793551	-0.60763	-1.06418	0.230119	1.00154
REL	0.990368	-1.42366	0.955761	-1.09216	0.696275	-1.52019	0.701735	1.87927	1.49298	0.721182	-0.579334	0.883967	0.712277	0.963825	0.836248	-0.233822	-1.22236	-0.748292	1.27124	-0.82721	0.476489	1.21996	1.98081	1.11517	-0.127037	-1.26171	-0.0359071	1.14106	-0.833435	2.45932	0.297575	2.66192	0.701317	-1.55651	-0.445524	2.2417	-0.242244	-1.83638	-1.6853	-0.661517	-0.136407	-0.112454	0.125245	-0.578103	-1.75212	-1.73699	0.0268599	-0.283522	-1.68222
RELA	1.06091	-3.25464	5.02662	-0.416332	2.8838	-2.41114	-1.76865	5.58415	4.95172	1.95394	-0.670772	6.00554	5.36928	4.69017	0.572559	-0.380595	-3.16682	-4.32147	3.05201	0.720534	2.04486	4.40129	6.1217	-0.868071	1.61788	-5.98096	0.179576	5.07385	1.6436	8.24239	0.300815	6.25647	3.31833	-4.52817	-3.74171	8.48614	0.298894	-6.05945	-7.00441	-1.89906	1.86225	-1.80933	3.99878	-0.728218	-1.39122	-4.64794	-2.02334	-4.4338	-6.33894
REST	-1.00525	-0.0398778	-1.46713	5.13733	-8.85684	0.304592	-4.44722	-2.72783	-1.36123	-1.74771	-2.27463	-3.61103	-4.49101	1.30159	-3.57102	-3.16503	-3.77706	14.1358	3.7196	-6.01296	-3.40575	-6.28113	0.214336	-3.48612	-0.974196	3.73555	-1.36445	-5.90028	-1.42521	-4.29499	-4.41735	-3.99703	-3.72454	-4.27912	-2.14874	-1.16148	10.2101	0.599877	14.3803	-1.41915	2.27994	-2.58962	-2.65138	-0.251057	-4.45772	5.25424	1.52925	-1.90645	10.8387
RREB1	-1.90865	0.514388	-0.204317	-0.555409	-0.239581	0.189599	0.621675	0.14242	0.536551	1.30305	-0.129826	0.0105412	-0.894916	1.27583	-1.42765	0.0418043	-0.508356	0.840054	-0.783696	0.343049	0.234078	0.914334	0.677862	-1.12281	-1.04373	0.0867413	-2.80653	1.03217	-0.749925	0.205687	-1.00076	-0.197535	1.20915	0.196511	0.337533	0.566066	-0.418424	-1.30655	0.971967	-0.381101	-1.32626	0.155443	-1.71092	0.722592	-1.0593	-0.132522	-0.378907	-0.460786	0.434048
RUNX1	-0.0983074	-0.731326	0.926887	0.107034	-1.06725	-0.31293	1.3368	1.46692	0.172923	0.827731	0.585765	-0.163179	1.71834	1.80225	0.0840053	-0.650478	2.62772	0.318835	0.216403	0.43548	-0.628752	2.06188	-2.49986	2.02765	-0.124816	-0.530873	-1.41121	-0.0241945	-0.402322	-0.452088	0.564334	-0.723059	-0.450669	-0.238696	2.24378	1.46482	-0.0319827	0.542961	0.293028	1.62241	1.14044	0.847653	-0.244477	3.05381	-0.321811	-0.589723	-0.706273	-0.358156	-1.98278
RUNX2	-0.154936	2.24022	1.82032	-0.942341	0.626966	1.90356	-1.23677	0.328829	1.96011	-1.34001	-1.91829	1.15262	1.80092	0.194552	-0.736283	1.00784	-1.49931	0.0387504	2.03145	1.74752	1.90456	-1.66517	1.05996	-1.43942	-0.897957	-0.744908	-1.24246	0.810344	0.142855	1.8764	1.57437	-0.943919	1.18576	-2.23115	-0.855697	-0.297912	2.13304	1.26806	-0.221081	1.5833	2.67835	1.62171	0.488106	-1.0181	-2.75381	-1.86252	1.43629	0.469721	-2.69315
RXRA	1.11912	-1.72963	1.75677	-1.77038	0.783693	-0.596363	0.1034	1.59995	-0.989112	0.15979	0.255233	1.47054	-0.0852524	1.6816	-0.845596	-0.383337	-0.315468	-1.2891	-0.288679	-0.873797	-0.347846	-0.163353	-0.64039	0.0833078	2.70405	-3.30065	2.84306	0.311446	2.02785	0.571695	-1.35621	-0.357162	-0.454278	1.50366	0.247146	2.2964	0.321915	0.546254	-1.60948	-0.129332	-0.402961	-1.96801	2.08667	1.23753	2.51254	-3.12621	-1.29052	-2.06394	-0.856512
SMAD3	-2.18293	0.428289	1.66969	-1.22193	0.96116	-0.0104423	-2.95164	-0.94467	1.35624	-1.60887	-1.53818	1.74961	2.78037	0.803058	-1.42692	-3.47903	-2.94495	-0.348011	1.94523	1.39821	0.298831	-2.65331	2.94475	-1.09416	0.592795	-2.11872	-0.900585	0.236074	2.10601	3.14678	0.659985	3.07816	1.62229	-2.20902	-3.43945	-1.41419	2.75804	-1.32073	-0.111613	2.75999	0.749859	1.71256	1.08431	-0.366409	0.186799	-1.63166	-0.208615	1.20752	-1.29701
SMAD4	0.550039	-0.0769603	-1.71775	-0.255947	-2.80571	-1.19273	-5.8958	-1.62673	0.680426	-3.81442	-4.13061	0.241368	2.33674	0.747816	-2.51526	-1.82457	-4.70782	1.37516	3.42355	2.65113	-0.679058	-2.82042	0.030535	-3.50851	0.0933488	1.25598	-1.45773	-2.19394	-2.05243	0.575033	0.297956	-1.46802	-1.65526	-2.44944	-3.6998	-1.32493	4.94488	0.382578	2.35582	3.24271	3.53105	2.3897	-0.512093	-1.62401	-2.82697	-0.936207	0.889541	2.32244	0.350785
SOX2	-0.100089	-1.04426	-0.466604	0.304822	-0.78841	0.0208289	0.743773	0.640887	1.60474	-0.346034	-0.636208	0.545403	1.447	0.595454	-1.3156	-2.04661	-1.30746	0.540916	0.828437	-0.652329	-0.0298976	-1.55456	0.217952	0.0543026	0.663005	0.112031	2.42588	-1.24543	0.0897846	1.04335	-0.583776	0.249859	-0.442551	-1.40666	-0.00764901	-0.135887	0.500929	-1.14439	0.768462	0.819925	0.643398	-0.313594	-1.13357	-0.330786	-0.94091	-0.112782	-1.84128	-0.755301	0.0260724
SP1	-0.660656	-0.571459	1.19152	-1.41096	0.958658	-3.77332	-0.268743	-2.0526	1.20484	-2.05038	-2.98321	1.7602	2.08565	2.75516	-2.09814	-3.59718	-2.87576	-0.349862	0.548288	1.42718	0.472641	-2.80102	2.47586	-0.477085	0.966933	-2.21496	0.283333	2.01357	0.522539	2.45871	-1.25159	0.846456	0.658064	-0.508198	-2.73499	-1.12591	0.23641	-2.89812	-1.27367	-0.239408	-0.155985	-0.701144	2.28543	-1.87065	0.866008	-0.753344	-2.35131	-1.38317	-0.0477341
SP3	0.441018	-1.55399	0.325066	-1.12766	-2.18165	-0.844758	-1.55808	-1.16655	0.729784	-0.498761	-1.59125	-0.0631208	-1.10328	1.58445	-0.314451	-1.33103	-1.15826	0.248179	0.655716	-1.40324	-0.222365	-2.13748	1.44908	-1.45018	1.42066	-0.772191	1.17677	1.35661	-1.18002	-1.21853	0.637299	1.09057	-0.407056	0.227472	-1.94503	0.87072	1.98596	-0.289064	0.0638158	0.691823	0.86046	1.02342	2.01612	0.475643	1.00475	-1.24058	0.853516	-0.0747566	-1.28601
SPI1	-2.33868	-1.55894	0.888837	-3.71786	2.00553	-1.4156	8.07602	10.001	0.256016	8.08336	9.95792	1.61407	-0.0451757	0.248085	5.59701	5.70325	3.71799	-5.99873	-3.36604	-0.442953	-1.16278	11.0234	-0.0132491	7.20586	-3.33613	-8.86205	-1.95239	1.59107	-0.295321	4.18932	-0.323751	2.21369	-0.446128	-3.56882	5.14887	11.8697	-3.46591	-4.76956	-8.4172	-1.41499	-1.45465	-2.38644	2.33874	5.98683	1.39243	-6.86069	-3.07507	-4.39206	-6.40331
SREBF1	-0.976551	1.46835	0.172169	-1.01619	1.84849	0.9798	0.330895	-1.14187	0.863838	0.953811	-1.92969	0.932977	0.530168	0.267868	1.16919	0.274236	0.246246	0.910079	-3.3386	-1.04274	1.77168	-2.78593	-1.02123	0.389848	0.70248	0.258623	2.22053	2.31926	1.20684	-0.505718	-1.43399	-0.900252	0.921737	3.16659	-0.579261	-1.0682	-1.25668	-1.20223	2.13911	-0.908305	0.26471	-2.87857	0.867724	-0.378951	1.89951	2.31393	-0.176823	0.683966	-0.605711
SREBF2	-0.539433	0.993429	1.42789	0.0962567	1.50487	1.03448	-0.873898	-1.09844	2.03778	-0.279014	-2.5319	1.7301	1.23501	0.736518	-0.483409	-1.38133	-0.291805	1.35271	-1.83662	0.79085	1.97111	-1.30838	-0.103749	-0.468176	3.02875	-0.384328	2.12422	1.70415	0.617772	-0.537818	-0.796313	0.825821	0.488139	3.25714	-0.388272	-0.205104	-0.769905	-1.34871	0.0190564	-1.8044	-0.54721	-2.261	1.62306	-0.872771	1.73942	0.860022	-0.109946	-0.681796	-0.00861895
SRF	-2.02292	-0.796894	0.507055	0.475263	2.28968	-0.719238	0.788007	1.39267	2.09038	1.52334	-0.589176	1.99952	1.92742	0.5192	-0.483207	0.884898	-0.710594	-0.961861	0.121175	1.08779	1.12818	2.56055	1.87231	-0.392264	0.226775	-1.75797	-1.12022	1.01445	2.08147	3.31743	1.79621	-1.2691	0.94509	-0.865553	-0.791122	2.23537	-0.322345	-0.475649	-2.91677	3.61278	0.818271	1.73783	2.06664	1.35846	-0.537659	-1.84924	-0.642083	-2.62374	-2.31993
STAT1	-0.146969	-0.382342	2.84587	-3.19976	2.14661	1.40272	1.49662	4.31043	1.792	2.6572	-0.139701	3.31443	3.76333	1.82213	0.719408	0.247915	-0.982192	-4.30192	3.85006	1.58322	-0.629643	2.20512	5.57971	1.51487	-1.72631	-4.35857	-2.39139	4.50283	0.422443	4.831	-0.299024	2.6457	1.36333	-6.26185	-1.35302	5.00345	0.961375	-2.07891	-6.21493	1.26671	1.61246	-0.534901	0.638258	1.07334	-1.14188	-5.36742	-1.28669	-3.80407	-5.01273
STAT2	-1.05326	-1.2027	1.7726	-1.57435	1.96849	-0.877717	0.841518	1.67677	0.603821	1.2852	0.348989	2.61259	1.08314	1.72525	2.88551	1.90854	0.514033	-1.05484	1.53282	1.15944	-0.740736	1.66439	4.01665	1.29918	-1.43742	-1.52631	-2.03948	1.94599	1.23994	2.05987	-1.29108	1.60538	-0.188012	-2.29778	0.447651	3.48838	-1.46436	-1.97572	-2.42394	-0.119178	-0.702327	-1.07062	0.489344	0.978016	0.32897	-1.61231	-2.12664	-0.582888	-2.59498
STAT3	0.357498	-0.91065	2.4038	-1.16395	1.18086	-1.14805	1.27866	2.89282	1.97794	2.31126	-0.861556	4.047	2.58216	1.05723	2.0206	1.69137	0.0590269	-2.53539	1.79178	1.25112	1.74035	2.80974	1.22803	2.11924	-0.822222	-3.8122	-0.458459	2.89427	2.03222	3.42816	-0.211866	2.12438	1.38246	-1.84129	-0.845534	4.12067	0.964531	-2.4862	-4.41604	1.12299	1.31435	-0.213579	1.34402	3.01284	-0.0169809	-1.66927	-2.49828	0.213224	-4.85948
STAT6	-1.01401	-1.16419	-1.32161	-0.188542	-0.354343	-0.448642	1.96689	2.2371	1.6703	0.497508	1.70716	-0.338423	0.805474	0.377213	1.05787	-0.213713	2.5703	0.186985	1.23445	-1.19729	-1.24871	1.85595	-0.559001	1.65177	-0.661881	-2.7817	0.496233	-1.19901	0.416189	0.297901	0.522289	-1.02581	-1.43569	-2.16846	1.45919	1.98772	1.75473	-0.849577	-1.07428	1.43316	1.32347	0.937135	0.295742	4.07979	-0.721159	-0.300059	0.384581	0.463116	0.390814
TBP	-0.740554	-1.13324	-0.989613	-0.584313	-0.946962	-1.02356	-1.49469	-0.0360868	1.85754	-0.100103	-0.567961	0.201877	0.0812726	1.90473	-0.725619	-1.47674	-0.403891	0.239286	0.48362	0.651716	-0.674545	2.92221	-0.189618	-1.95797	1.59486	-0.6787	0.103948	-0.752773	-0.0201711	0.339275	2.43326	2.13203	-0.980679	0.56547	-2.10395	-0.0242576	-1.0316	-0.270773	-0.634035	-1.26112	1.27649	-0.533097	2.47686	0.162208	1.59252	-0.941223	0.162579	-0.125271	1.10692
TCF12	0.425894	0.973098	0.920056	-0.555281	0.190298	-0.0977366	-0.877862	-0.176212	-0.285365	-0.928575	-1.352	1.34148	2.0385	0.917002	-0.52577	0.217615	-0.704403	-2.16888	1.18366	1.96727	2.96018	0.254842	0.307981	-0.933351	-0.540128	0.523044	-1.72906	-0.170912	0.115949	1.25486	0.326054	0.159707	0.903613	-0.816945	-1.43519	-0.00186567	0.079871	-0.745626	-1.74168	1.33108	1.02948	1.66085	0.383551	-0.319812	0.480807	-0.124455	1.11827	0.213307	-2.48334
TCF3	-0.00630467	1.39348	-0.780434	0.193391	-0.443257	0.0483979	-2.96395	-0.25195	0.217538	-1.54286	-1.65049	-0.946171	0.614832	-0.902141	-1.14427	-0.812512	0.391642	-0.395808	0.713236	-1.43745	-0.192521	-0.239776	0.285884	-1.78903	-0.27573	-1.73068	-1.47926	-0.221315	0.297795	1.14068	-0.0360824	0.685017	-1.12094	-2.03605	0.417777	0.247312	0.607953	1.28756	1.36273	1.30876	1.12274	0.559297	-0.0910312	1.01673	-2.32434	-0.0862277	1.26581	1.47992	0.210908
TCF4	-0.106766	-0.453265	-0.844839	1.87389	-2.09863	0.852947	-3.0759	-1.29006	1.67804	-3.49205	-2.7741	-1.65022	2.49779	0.713471	-2.4108	-2.5972	-2.69226	0.924184	2.2271	1.29737	-2.51204	-3.14047	-0.802806	-1.26025	2.47118	-0.835469	3.15358	0.183411	-0.757018	0.617334	2.31741	0.791275	-0.464681	-0.675192	-4.00137	-2.34609	4.69663	3.35319	0.434301	2.81702	3.54941	2.88972	1.11934	-2.06734	-0.840065	0.194232	-0.412431	-0.0705464	-0.699554
TEAD1	1.31381	0.0850973	1.57444	1.84017	-0.216546	-0.0183543	-1.3724	-0.705487	1.3971	-1.01816	-1.83275	1.96252	1.68769	-0.510894	-1.83811	-1.304	-0.647802	-0.313014	0.362718	0.914337	0.164042	-1.20998	1.58785	0.275216	-1.54061	-0.57545	-0.590918	2.69555	1.10543	1.17469	-0.362498	0.445049	1.06715	-1.65174	-2.30213	-1.63872	-0.362245	0.306569	-0.988935	-0.597593	0.0963453	-0.973761	0.416745	-0.85202	-0.568523	-1.55848	-0.459895	-0.22476	-0.30698
TFAP2A	0.850494	1.68501	1.25314	-0.433327	1.24496	-0.532356	-1.61594	-0.963497	2.44214	-1.30439	-2.34351	0.213632	0.515731	-0.38246	-2.02454	-2.4788	-0.0579986	0.573855	-0.165188	-0.557127	0.30021	-0.847501	0.846195	-0.421331	2.52438	1.26346	-0.417138	0.511217	0.690067	2.33473	-0.456416	0.877199	3.0887	-1.78247	-0.50681	-1.10975	-0.158902	-1.49945	-0.370836	-0.547835	-2.18643	-0.883311	-0.312353	-0.788232	-0.847179	-0.541507	-0.459422	-0.493858	0.690294
TFAP2C	-0.794497	1.02111	2.85014	-3.72258	4.11356	-1.50691	-6.43442	-6.68097	-2.35877	-5.75003	-6.74104	4.74851	4.58542	2.31151	-7.88342	-8.08924	-9.03234	-1.39284	3.54295	3.40323	2.32672	-8.11053	3.52037	-5.92906	1.93948	-6.88944	0.530311	4.67107	3.04573	9.56342	-5.07655	3.18637	1.52141	-4.28522	-10.2029	-2.70737	2.44895	-1.90139	-1.66627	2.1256	2.18264	-2.88638	2.89783	-4.94911	2.99072	-2.18435	-0.623539	4.50218	-3.93427
TP53	-3.22137	-1.19223	-0.391713	-0.61808	1.50952	-2.4469	-1.10591	-0.244717	0.107636	-1.81378	-1.38328	1.20545	2.00105	1.59932	-0.989751	-1.21922	-2.47966	-2.78874	0.087902	0.786653	0.870383	3.38588	4.22518	0.481884	-1.78955	-3.09746	-0.284397	1.26299	-0.284058	2.37057	0.916687	1.42903	2.70131	-2.16772	-2.19172	4.04749	0.975139	-3.05565	-2.20597	2.28882	0.16104	2.0027	2.3912	-1.09058	0.00015406	-3.61626	-2.85041	-0.642278	-1.41008
TP63	1.06678	-0.232617	3.13147	-1.61369	2.88935	-0.568875	-1.82022	-0.123477	1.03708	0.331911	-1.09468	3.89026	3.10598	-0.101891	1.50552	0.894648	-1.89966	-2.1393	-0.536997	1.26001	1.03708	-0.285503	1.52842	-2.0534	0.375512	-2.80884	0.555696	2.35069	2.905	3.00999	-0.0752207	-0.304127	1.40592	1.55218	-3.03161	0.367875	-0.558172	-2.12215	-2.45492	0.760464	0.166757	-1.2537	3.0537	-2.27112	2.04585	-0.911036	-0.667831	-1.46898	-1.74252
USF1	1.6057	1.66888	0.415	0.465035	0.199144	0.0248033	1.89179	-0.75759	-0.488713	0.350714	-1.03696	-0.8164	-0.0120015	-0.455714	3.15092	2.28126	2.13642	-3.71915	-1.77293	-1.74572	-2.91037	0.720122	-1.65099	0.320124	2.26756	-0.133685	2.54212	-0.948505	-2.75533	-1.17873	-0.680161	-3.07987	1.85955	2.69241	0.964854	1.52893	-4.13154	-0.508678	-2.20465	0.423416	-2.01109	-2.743	2.23789	-2.05991	4.60026	1.42046	2.93155	-3.3034	1.23454
USF2	1.52683	0.542289	-1.66333	1.11263	-0.174154	0.414005	1.51637	-0.371305	-1.71463	0.419999	-0.000807748	-1.41222	-1.96717	-1.48656	-0.458091	-0.387694	0.98389	-2.38547	-0.926915	0.632826	-0.820105	-0.341133	0.0763388	-0.283666	0.659025	0.397208	-0.296616	0.849396	-2.35035	0.902161	-0.879334	-0.244256	0.471442	0.141259	0.626941	-0.378938	-3.12578	0.943387	-1.57718	0.234188	-0.876673	-2.23287	1.38102	-0.766182	1.12163	0.939189	0.89604	-1.25388	1.00302
VDR	0.711554	1.02105	1.36927	-1.07879	2.35091	0.432052	-0.403371	0.738036	1.17475	-2.64153	-1.34536	1.30274	4.07561	1.20206	-3.10668	-2.95525	0.0588927	-1.54305	1.43805	2.1082	-0.362902	-0.475914	2.5384	-0.333159	-0.981914	-4.10878	-0.638945	2.10026	0.254858	3.31124	0.231652	0.958415	1.38393	-2.2328	-1.50917	1.08992	0.587936	0.149015	-1.19239	0.933129	0.946486	-0.0275266	0.732231	0.147197	-0.763215	-2.30342	0.0674261	-0.677526	-1.39708
WT1	-0.268428	-0.799897	-0.127384	-0.216021	0.0606709	-2.41106	-0.271708	-1.15982	1.22136	-2.79276	-1.4044	-0.168476	2.2331	0.642629	-0.788972	-1.84926	-1.20655	-0.248511	0.582003	2.25955	0.886167	-2.48488	1.83058	0.252615	1.19108	-1.74435	0.0545583	0.95436	1.24944	1.32325	0.793339	1.22956	-0.306365	-0.915048	-1.74543	-1.82365	2.09631	-0.71836	-0.732998	2.29201	1.85766	1.24035	-0.109381	0.179661	-1.1407	-0.79795	-1.07386	1.24119	-2.21463
YBX1	3.6281	1.83057	-1.24003	-2.41466	0.580574	-1.54012	2.05723	1.56855	-0.868636	2.52833	-0.514228	-2.28049	-3.48042	-2.08316	1.30087	0.434173	1.72327	-2.95585	-2.66748	-0.56033	1.7567	2.81288	-0.211004	1.49042	1.61838	2.49649	1.42413	-0.991815	-3.70287	-3.0064	3.17509	0.403271	1.88555	2.35883	2.20718	-0.78056	-2.969	-0.0156694	-3.07448	-2.16699	-3.86669	-1.05936	1.0491	-0.267073	1.08321	-1.01364	1.50796	1.7656	2.25034
YY1	2.96125	3.34533	-0.509412	-4.32317	4.13827	-0.420051	5.61974	1.92476	1.74933	2.13155	3.15086	-2.92056	-1.76482	-6.22253	7.04049	3.08943	4.57574	-0.696929	-5.61781	-1.78001	-2.13022	6.00829	-4.94397	3.92641	0.297907	6.28571	1.80073	-2.58182	-5.2514	-4.92248	3.43578	-4.36026	3.50988	0.727777	5.64971	1.11064	-5.31185	0.821698	-3.27369	-0.365044	-4.82488	0.578688	-2.34852	-0.809064	1.40798	0.590174	-0.460842	-0.570378	2.25706
ZEB1	-0.875999	-1.39053	2.96636	-0.69339	3.5857	-2.50009	-0.508383	0.857261	-1.61358	-1.25913	-0.102414	3.14304	0.438194	0.629612	-1.66888	-0.668593	-1.55276	-0.923169	0.245276	0.237322	3.79013	-1.29063	4.5293	0.301043	0.468764	-2.71615	-1.9579	2.88074	3.35496	3.43487	-3.69195	3.48693	0.573036	1.58052	-1.4355	-0.343502	-2.28415	-1.41377	-1.49957	-1.74986	-3.14393	-1.87773	1.93509	-0.283282	2.7981	-1.83103	-1.87511	1.94046	0.480066
ZNF263	0.0294212	-0.901904	2.1273	0.989445	1.46983	-0.700053	-1.18893	-0.293887	1.96682	-0.541139	0.0238798	2.92075	2.99359	0.907012	-0.503958	0.104093	-1.10097	-0.544069	2.15862	1.89571	0.444127	-0.45702	0.198018	0.309937	-0.581524	-0.318428	0.0515408	0.791631	0.978214	2.18663	-1.34352	0.284857	0.672157	-0.581332	-0.969265	1.28164	1.00886	-1.36357	-1.90543	1.39403	-0.241383	0.255176	0.035883	-0.332775	-0.867805	-0.535169	-1.29334	-1.52779	-2.39247
ZNF423	0.844224	1.65262	0.381697	1.77143	-1.11094	1.63672	-1.99213	-1.92726	0.257356	-1.23841	-1.79634	1.27099	2.47985	0.314245	-0.748545	-1.8531	-1.11108	0.633764	0.457701	1.1226	-1.14368	-2.387	-1.02125	-0.355249	-2.47681	1.32706	-0.476426	0.105279	-1.78054	0.578963	-0.591812	-0.697991	0.153242	-3.38118	-1.85294	-1.8986	0.872688	1.05619	1.7489	1.47305	0.549337	-0.330131	-1.33841	-0.227661	-1.86862	-0.750705	0.507481	-1.12316	1.21094
[truncated: 1,313 more columns]

## Sheet: table3C
Table 3C. Tumor type-level activities in primary tumors
	AHR	AR	ARNT	ARNTL	ATF1	ATF2	ATF3	ATF4	BACH1	BATF	CDC5L	CDX2	CEBPA	CEBPB	CLOCK	CREB1	CTCF	E2F1	E2F4	E2F6	E2F7	EBF1	EGR1	ELF1	ELF5	ELK1	ELK4	ERG	ESR1	ESR2	ETS1	EWSR1-FLI1	EZH2	FLI1	FOS	FOXA1	FOXA2	FOXD1	FOXF2	FOXI1	FOXM1	FOXO3	FOXP3	GABPA	GATA1	GATA2	GATA3	GATA4	GATA6
ACC	-4.90792	-7.05694	-4.15842	-1.31731	-2.55054	-3.39111	11.648	7.6772	-4.88939	-9.94806	-7.84513	-6.9982	11.8258	-7.6009	-3.35023	5.31931	-3.73161	-4.02073	-1.31683	-6.78308	-2.81112	-14.1242	5.10629	7.10402	1.243	1.83654	7.79778	7.40268	-12.9964	-11.7975	9.30122	-4.71714	8.86141	-3.1668	2.7494	-10.7676	-10.4452	0.193853	0.529265	-2.31736	-2.50389	4.01511	-1.93171	4.53143	-5.5816	-5.35603	-10.8896	-5.57892	-5.50669
BLCA	4.94278	-14.3144	0.440655	-16.8482	2.4632	-3.03031	-2.59416	9.88606	4.37867	-12.3911	3.20299	2.2319	-3.51979	5.36428	-18.7275	5.05019	-6.66179	11.7436	13.202	-0.827516	10.4293	8.20859	-4.78395	17.8478	7.09838	15.1216	12.5384	-8.57995	-5.18571	-14.5144	14.3232	-9.5189	-1.64999	-9.93105	15.898	-6.32386	-11.402	8.43659	-18.1292	-13.4925	13.1173	7.73343	0.81264	13.7162	-10.8476	-4.20758	0.454608	-6.09847	16.2919
BRCA	26.3657	8.87056	18.493	9.12794	9.93461	-11.9084	-15.0018	-31.779	0.951099	8.35971	14.084	6.8526	-21.6446	-12.2529	11.3004	1.36847	-13.8117	6.5697	7.46717	23.7717	10.4445	-2.94613	16.7251	-11.8848	6.92804	-6.63326	-7.33629	17.6912	41.1435	21.032	-2.89232	1.11068	-8.118	6.16324	-6.92497	28.3211	1.46044	-12.9299	4.77665	9.97853	1.24629	14.1405	15.3679	-8.13304	-12.3399	6.30391	41.0411	-6.48518	11.1123
CESC	-9.31855	-15.1118	-8.28409	4.42189	16.9338	10.9557	8.82511	10.5464	-1.48369	-4.7014	7.95189	0.895156	-7.89862	1.61901	3.03405	12.5705	9.40156	31.6706	29.3967	2.16372	27.104	15.3298	-1.84842	15.0249	1.75024	15.369	19.073	-17.0996	-5.14687	-11.5387	11.2443	-3.2146	7.79549	-7.13438	12.7361	-5.3665	-14.5025	4.61391	-21.6466	-20.4356	24.3312	12.0981	11.1623	13.7223	-6.35141	-7.5822	2.56733	-0.803712	16.8882
COREAD	-15.4346	-11.9835	-28.7349	-21.1994	8.9795	15.0323	-13.602	15.394	-1.83888	-11.3523	-10.8835	42.525	3.24554	4.28713	-18.4959	-2.87791	2.49061	18.7845	16.5083	22.2289	15.8687	11.842	6.1139	24.5643	8.27489	32.7168	15.2588	-1.84139	-5.08649	0.877937	15.2238	0.102791	13.4734	-8.25626	17.9317	3.85906	23.0774	12.2783	-13.925	-21.5535	21.9095	6.313	1.69598	12.2024	0.0553428	5.93753	1.19731	8.13938	5.59411
DLBC	-3.15301	-13.1835	-3.78017	-10.944	4.0108	-2.78949	7.55875	3.03864	-3.67518	13.0903	1.66356	-7.92155	3.54522	-0.453663	-11.7831	3.19797	1.57193	6.43058	10.4768	1.6319	5.15447	4.24629	3.17264	12.4336	8.69842	9.97852	9.72629	0.125297	-14.3634	-14.6048	13.1391	-3.68174	-2.74408	9.7618	3.90072	-17.297	-15.2581	-7.69727	-5.1922	-3.63473	6.48803	1.37217	11.8996	9.08636	-0.647821	-1.12839	-16.5088	-16.0583	-7.16184
GBM	-10.1014	3.62674	-3.45392	-4.10784	4.58552	0.150582	11.764	0.716756	12.6473	5.14153	-0.840944	-9.78124	13.0799	4.58975	-9.09794	-0.987564	-0.274422	-4.81514	-4.9177	0.00624756	-2.24603	-12.5145	-20.6021	-12.8411	-10.2954	-15.9855	-14.9326	-15.4065	-18.0929	-10.3161	-7.80203	9.32839	4.52316	4.6451	-10.9509	-20.4078	-19.227	-2.47168	4.18347	13.2436	-0.891027	-11.0593	-14.4775	-5.9168	-8.3745	-14.2631	-18.1782	-9.45816	-19.743
HNSC	5.04572	1.29325	4.35875	-0.0605394	16.252	17.3138	12.8252	14.3143	13.3695	-2.94036	0.609249	-1.51841	-2.11494	8.39779	-3.79716	12.4061	37.6663	16.2636	15.0509	-8.53142	16.3849	17.2418	1.92661	10.6845	3.48862	17.9876	17.9013	-12.1608	3.29711	7.34926	5.693	16.6888	1.81238	-3.07103	28.2161	3.46534	-11.4581	7.44025	-16.8292	-8.57487	17.3378	23.3801	8.4983	18.2905	10.0434	6.13622	11.6038	11.6113	5.92664
KICH	2.30566	2.65771	-4.07888	6.76549	-8.74573	-6.09955	5.79451	6.6733	-6.46367	-5.03426	-3.03958	0.988356	-6.76009	1.38176	7.72758	3.81378	-2.09012	-6.14224	-6.62371	-4.88737	-10.719	-1.25943	-0.80259	5.35112	5.61139	-4.90203	0.0917189	9.88756	2.54615	2.9424	2.32066	0.872154	2.64252	-0.890297	-1.4	1.05861	-5.01247	-2.34803	8.7739	0.480334	-7.5569	7.24667	-2.46824	1.40561	4.7857	-1.01603	0.559855	-6.76606	-5.80446
KIRC	1.82138	22.757	36.642	22.8986	-8.41974	17.09	3.12114	-16.2873	-0.567165	22.5023	-1.40076	-9.54436	13.1947	31.275	24.5678	-11.4806	0.594259	-20.8105	-20.1569	-13.2767	-20.1802	-10.226	0.800784	-11.9265	-6.46292	-23.4569	-16.8041	24.8838	9.70939	-3.72439	-23.4405	-4.53149	6.64792	36.262	-20.8319	5.29859	13.1775	17.6368	27.6258	21.2291	-21.5751	-0.0390512	2.60042	-28.7634	19.3227	28.4315	3.01248	11.8372	-3.31226
KIRP	-26.759	-2.23974	-3.74951	6.16501	-28.293	0.0707858	-1.87112	3.37243	-16.0752	7.15069	-5.20939	0.778856	-1.6751	-0.2013	7.41245	-12.4437	-4.81521	-13.8645	-17.0806	-10.5715	-18.0116	-3.7344	3.40333	-2.12187	-5.00698	-6.46691	-6.59445	-6.34508	-5.85284	0.979618	-3.81282	-9.56522	3.85485	-6.09309	-5.77721	-6.7829	4.04737	-4.23101	2.66778	-5.6369	-18.7536	2.1453	-10.365	-2.61519	-2.9436	-1.98847	-8.92151	-4.65574	6.25309
LAML	6.11113	-12.3393	8.56488	-6.92262	11.1511	14.4882	-20.6469	-2.60984	-3.75225	27.4706	12.9167	-6.95586	14.5624	-7.91048	-8.46182	13.9055	-1.7902	5.61198	9.84453	11.347	7.03851	-10.1904	11.3594	3.25249	5.56408	2.30545	-10.7575	3.71986	-22.9819	-8.16634	1.44427	7.6558	11.0172	18.0137	-0.898495	-11.904	-9.56842	-21.451	-3.05734	-3.24883	1.60925	1.40709	26.1221	-6.62579	24.6741	7.15744	-18.5136	8.43235	-2.18267
LGG	-10.4836	14.7238	1.76125	10.1682	0.93022	-18.7231	2.69175	-12.3293	15.6294	-0.919522	3.15532	-12.4817	9.51463	-9.81261	0.895463	6.9103	15.6188	-24.7259	-18.4192	-6.93347	-21.4535	-37.6143	-20.2351	-27.9822	-12.4352	-27.73	-19.1415	-11.2539	-19.9492	0.659067	-12.8244	25.1088	-10.7262	-2.07645	-35.8739	-19.8072	-22.906	-6.01417	7.78253	28.0117	-18.0718	-2.64014	-19.929	-11.9199	-0.702047	-24.0355	-24.1362	10.0465	-13.5033
LIHC	-17.7677	-11.5748	-28.0549	6.90066	-10.3758	1.39428	19.412	0.947465	-3.56763	0.708143	7.0047	-13.0705	14.2687	12.4823	12.5787	-4.65892	-6.11645	-2.53927	-3.04397	-5.52773	-4.26647	-9.06141	0.757988	14.8637	5.66562	2.42202	7.41797	-5.689	-8.70736	-8.45328	18.3334	-17.1933	-10.1689	1.96824	0.674323	2.81293	38.438	0.020598	-3.14368	-11.6688	-5.57325	-1.74833	-0.945352	6.533	5.02384	8.87868	-11.483	-9.42567	-18.0288
LUAD	24.1814	7.02562	2.33423	6.90803	-4.56375	-2.04931	-4.20325	-0.846436	18.1701	15.055	0.0961116	0.176541	21.5313	16.9809	10.3105	-11.7128	2.4005	-6.22476	-8.73055	3.8322	-3.63149	20.2404	-2.43355	-15.9865	10.2191	-7.99509	-7.69238	5.08302	8.45204	10.939	-20.8303	-3.30104	-1.71084	12.8138	-4.60091	12.2095	21.9328	-1.68655	10.9349	-0.223641	-3.82513	-5.13658	0.373081	-14.8751	11.7704	16.8934	8.05906	1.35588	4.03478
LUSC	3.28659	1.64731	-4.11242	-5.39165	15.5	3.64708	-0.0965262	10.8009	15.5542	3.69747	-2.05395	-6.27663	13.8431	14.7306	-9.03316	1.88701	19.6541	14.2902	8.51668	-3.37292	19.6524	7.4005	-15.5687	-10.3375	-1.54158	4.98334	4.52976	-10.5288	-2.06664	-10.8358	-6.34762	10.1016	-2.35973	-2.72445	14.8559	2.70797	1.74337	6.29171	4.64804	-2.58894	14.8149	-7.2254	2.56887	5.90225	0.536202	-7.47086	6.9868	11.3741	10.5993
OV	11.4803	-10.0306	-3.71171	-16.8284	-2.215	-9.69609	6.80744	14.4494	-0.0243516	-5.01173	6.17242	-1.96131	3.20689	-16.4272	-14.8991	-20.7917	4.17631	6.18267	3.46137	-0.777514	-3.43186	11.0855	-8.36974	-11.3851	-10.2697	0.370921	3.46188	-8.24628	-2.44176	-2.55144	-0.505761	0.245372	2.24771	-15.8927	-0.161668	-8.63068	-8.07246	15.8255	-0.119622	-6.8075	8.72584	-6.16954	-12.9315	7.24861	-13.0224	-21.1581	-12.2272	-13.1639	6.12015
PRAD	1.90472	13.0566	6.97505	8.70139	-17.9906	-21.0072	-19.7503	-14.249	-33.3196	-20.1284	-12.9651	15.0127	-38.2512	-15.3	13.8345	6.03734	-33.3497	-27.3052	-27.7834	-5.45092	-28.9106	-21.7129	-1.11696	-3.01578	-8.1653	-19.1117	-9.85518	9.78071	4.32567	14.2762	-0.405266	1.15066	2.4301	-21.4581	-21.033	17.0102	0.623624	-21.3923	1.68211	4.352	-29.7715	-14.1404	-16.7411	1.33051	-13.6558	-14.6341	8.75188	-8.22079	-0.768208
SKCM	-17.2847	0.701399	-1.39935	-14.0709	14.031	-3.35044	17.0632	0.0456537	11.1028	1.36349	2.45473	-35.1628	11.0296	-16.6415	-17.7232	22.4231	-3.64331	8.59574	11.2101	0.000148914	14.1344	-4.97206	-1.80414	25.192	31.3889	12.7836	12.7948	-11.4295	-11.6335	-13.1668	19.1442	-4.46598	2.00682	2.19119	17.6325	-21.0278	-18.0016	8.70755	-13.1244	13.0113	7.8655	-7.52734	13.7159	15.596	6.081	3.76314	-12.4307	-4.62737	-13.2769
STAD	11.8671	11.4523	0.376235	-2.41614	5.49142	8.19912	-13.1696	7.74221	14.2346	8.16818	-3.01159	28.7108	6.82649	7.92268	-3.48961	-4.49662	1.22007	8.7486	3.3212	22.7879	7.86327	4.82466	0.352672	-8.57368	-24.5588	-4.17015	-21.8518	5.20373	10.8647	16.4655	-14.0599	15.5236	28.8786	7.93998	2.72125	13.5254	23.9979	28.044	10.0416	-0.646339	11.4562	0.308679	1.55649	-19.141	17.642	11.747	9.5967	16.9766	17.2509
THCA	5.52194	6.63598	-0.860454	27.9854	-25.9566	15.953	17.8349	-0.263232	-18.6662	-10.71	-8.97798	-20.7466	-22.9703	-11.9799	29.4261	-7.81757	-3.97292	-28.0926	-23.0289	-22.7263	-29.6616	12.3494	26.9152	1.22901	-11.1368	-0.841363	4.58949	14.833	0.272999	7.50848	-5.55124	-8.79145	-33.8399	8.23925	-13.1622	6.61531	-8.97143	-27.6683	8.87924	15.5306	-33.4681	4.96661	5.70235	-10.3068	7.32111	11.5296	-0.827187	-2.03063	-39.5108
UCEC	-14.9025	-20.3489	-6.2599	-18.9649	-9.54478	-15.7219	-7.52022	3.15351	-19.7552	-16.9918	-8.2259	10.4443	-8.82169	-7.55988	-15.88	-5.58312	-11.7333	3.31299	5.10621	-13.562	4.18276	3.82482	-5.86934	1.90653	-3.29491	3.25195	5.60911	-0.927996	-0.825387	-8.68694	6.61993	-21.5462	-6.85484	-18.8842	8.29163	-13.7348	-4.78051	-7.67415	-3.27879	-17.4285	10.4813	-25.7847	-17.3121	9.4327	-19.4543	-15.1283	-13.2573	-5.59611	5.98995
UCS	-0.469234	-3.95308	4.97937	-5.83851	5.83554	-5.35507	-3.33478	0.550987	-2.22523	-7.47362	4.53095	-2.981	1.64815	-7.27436	-6.60936	0.39258	0.130478	1.62805	4.11394	-0.937895	3.30806	-1.96231	-3.96754	-3.35517	0.680137	4.83212	4.03861	0.235875	-5.48627	-6.13083	3.31995	-0.374148	0.406076	-5.60475	2.80277	-9.1617	-6.39631	-2.62122	2.64355	3.94396	5.43389	-9.15908	-5.7758	5.87093	-10.2932	-7.68676	-6.76697	-4.16046	4.33224
[truncated: 78 more columns]

## Sheet: table3D
Table 3D. Tumor type-level activities in cell lines
	AHR	AR	ARNT	ARNTL	ATF1	ATF2	ATF3	ATF4	BACH1	BATF	CDC5L	CDX2	CEBPA	CEBPB	CLOCK	CREB1	CTCF	E2F1	E2F4	E2F6	E2F7	EBF1	EGR1	ELF1	ELF5	ELK1	ELK4	ERG	ESR1	ESR2	ETS1	EWSR1-FLI1	EZH2	FLI1	FOS	FOXA1	FOXA2	FOXD1	FOXF2	FOXI1	FOXM1	FOXO3	FOXP3	GABPA	GATA1	GATA2	GATA3	GATA4	GATA6
BLCA	1.09117	0.759638	0.597904	-1.14911	1.79158	-0.0233326	1.98406	0.0809021	1.92574	-1.24254	1.69939	0.957638	-1.94019	1.82983	-2.46032	1.67659	1.7144	2.93005	2.61058	-0.438885	1.37461	0.55647	0.422869	2.20332	-1.74032	1.17602	1.94047	0.684323	0.982586	0.0245769	0.733548	-0.826957	0.662772	-2.43649	3.84262	1.1364	-1.41225	2.89136	-2.2383	0.378894	2.84299	0.750942	0.0287854	1.77988	-0.365053	1.62387	2.32793	-1.03852	3.81143
BRCA	2.54921	-2.37214	2.54899	0.110488	0.214017	-0.150926	-2.40982	-2.92804	-1.8181	-0.820331	-0.849514	1.23617	-7.65876	-1.13237	2.37221	-3.02653	-4.33994	1.56393	-0.0526076	2.19242	0.827724	1.31202	1.52429	-3.34758	-1.85361	-3.17035	2.67355	0.687587	6.5971	2.29778	-0.203244	-1.85875	-1.99239	-3.17274	-3.36674	4.52642	-1.55464	-0.0445505	-1.81155	-1.6833	0.315818	2.36499	-1.14853	-1.25151	-1.83368	-1.61435	6.32603	-1.73273	2.0368
CESC	1.10261	-0.601041	1.30452	3.96133	2.91432	1.95233	-0.093264	0.771149	-1.56196	-3.28153	-0.037269	-1.2579	-1.97858	2.72009	4.1202	1.33205	2.73789	4.01718	2.17274	-0.591936	2.64777	2.87667	1.37656	-0.764648	-2.47656	-0.846068	3.12723	0.121794	0.759704	-0.124143	-1.18902	-1.244	3.57133	-3.37245	1.79605	1.3886	-0.645197	2.16732	-3.50323	-1.57817	2.16239	0.140469	-0.748254	-0.239381	0.964778	0.224319	2.60795	-0.635149	1.95502
COREAD	-4.01254	-5.31539	-5.0517	-0.566494	-5.99655	1.48216	-6.27613	1.95307	-1.27746	-5.52132	-3.81338	10.0741	-2.71265	-2.16255	0.928238	-4.58745	-2.3357	0.224617	-0.317184	4.63142	-0.068784	4.9674	2.46078	-0.670121	0.382248	2.89169	0.395982	2.8255	-1.93586	0.807671	0.550581	-3.30534	0.488287	-4.78685	-3.30356	1.75083	6.15685	2.46273	-3.45451	-7.41445	-2.08547	3.67304	-0.127086	-0.313787	-2.62697	-1.8047	0.434106	4.7579	4.1093
DLBC	-7.61903	-8.30044	-4.02758	-2.29419	4.06521	2.23913	0.366864	-2.07149	-4.97415	9.68197	7.1911	-7.15706	0.711012	-8.94481	-3.53407	7.73206	-4.04919	6.45169	8.04534	7.21888	4.61812	-2.97162	3.67268	7.19962	4.26066	8.77095	5.23945	-0.22597	-10.2542	-11.0146	10.1408	-0.445147	1.01408	7.89951	2.99783	-9.4544	-9.70924	-7.58644	-1.76256	-1.51089	2.88822	5.67073	11.1591	6.1566	-3.56158	-6.67924	-9.6924	-4.65054	-6.6797
GBM	4.60686	6.5329	1.44014	0.0657448	4.31654	-2.09183	5.93341	-0.302605	2.98688	-0.00969169	0.100348	1.27956	-0.88171	2.20914	-0.967527	0.997207	0.867729	-0.815031	-0.613204	-1.13787	-0.310054	-6.00262	-2.33942	0.614139	-2.15814	-2.06028	-4.0491	-0.630454	-0.444121	-1.46285	-2.74153	2.60827	3.71553	3.89116	0.266108	-2.09608	-1.46842	0.605758	5.67012	6.93305	2.02624	-0.901857	-1.2967	-1.00226	-0.587549	3.19014	-1.64475	-0.531621	-1.31035
HNSC	4.57968	1.03404	0.951575	5.05571	-1.29385	4.02941	2.53791	4.90229	1.28509	-3.5315	-1.41282	0.477421	-2.53639	5.55758	3.94037	-0.700027	6.51589	-3.4681	-3.24902	-8.22765	-3.35815	4.1672	2.02499	-1.24455	-3.49462	-0.623534	1.04542	2.60675	4.91119	1.91707	-5.11857	3.16765	-0.846234	-3.35766	-0.439831	4.59843	2.22652	0.492896	-3.60998	-1.97125	-2.35013	1.73771	-3.21691	-0.642453	4.25325	4.09521	5.51815	1.84161	3.04179
KIRC	1.16734	4.52534	-0.541365	-1.47784	-2.33898	1.45216	2.58932	0.139932	0.0563826	3.82357	-1.10727	0.876326	1.21086	1.47927	-1.54847	-2.68179	0.224397	-0.843068	-0.607574	-0.707722	-1.53055	-3.83176	0.0566116	0.391364	0.506405	-0.521308	-3.11167	-5.08685	3.23974	6.82713	-2.26834	1.33613	0.90656	-3.037	3.14446	0.0261015	1.4071	3.5521	2.33526	2.07861	0.982591	-2.6268	-2.18241	-0.654472	-0.431298	1.85699	0.147074	-1.72777	-0.89511
LAML	-3.88288	-8.87889	-6.38805	1.42223	4.35415	3.80904	-4.64095	-2.75709	-5.38291	9.0392	4.80914	-8.46163	9.20957	-2.0195	-0.292917	3.02788	-3.56346	1.25048	3.21209	2.13022	0.449335	-1.56213	2.97228	5.82949	3.67299	3.35852	1.07776	3.29078	-8.10083	-6.45576	6.5913	-6.23505	4.6687	11.0803	1.09126	-7.91912	-7.41215	-10.3034	-3.23123	-2.74246	-1.58259	-0.231669	7.15573	4.11762	8.11047	4.68894	-8.79731	-1.51025	-5.23362
LGG	1.35017	4.70036	-0.0506071	0.688747	3.12452	-2.37286	3.32479	-2.05503	1.30129	1.26501	-1.11783	0.93347	-0.106034	-0.444667	0.147701	0.34457	-1.75982	-1.58387	-1.5335	-1.3291	-1.04703	-5.90513	-2.89265	-1.42067	-2.22513	-2.83988	-2.52968	0.328623	-0.214613	-0.702811	-3.86228	2.88126	-1.32813	1.85974	-1.41795	-1.34187	-1.64579	2.02346	2.98711	5.21845	0.473796	-1.7796	-1.8162	-2.08681	-0.312881	1.25543	-1.16838	-0.35183	-1.48666
LIHC	-0.200264	0.393612	-0.0210689	0.162446	0.0662541	-1.26555	3.155	-0.0583078	2.98576	0.768106	-0.44539	0.970428	1.18555	0.338819	-0.418729	-2.1052	2.25696	-0.908417	-0.486851	-0.983829	-1.20499	-2.36608	3.18136	1.13865	-0.733013	0.0983626	0.12523	-1.8266	-0.240854	0.647709	0.889613	-0.976325	-0.0188261	0.0949009	2.38983	0.219723	5.24883	1.24462	3.02457	0.550571	0.406044	-1.07251	-1.28813	-0.259701	-0.821787	1.43125	-0.947823	-0.468554	0.850232
LUAD	4.26553	1.02814	7.02652	1.32217	-1.29085	-2.29195	-1.15245	1.40116	0.370098	-3.0859	-1.92908	0.834528	3.59208	4.27865	2.90457	-1.49114	1.10778	-0.972981	-1.58884	-0.359476	-0.594373	5.09984	-2.09119	-6.12178	-0.553929	-2.36438	-2.09175	-1.3691	3.72852	2.96725	-2.31276	1.96857	-1.96359	-1.97426	-2.24848	4.08658	4.28629	1.13503	-1.74029	-2.24682	-0.482092	-2.17356	-3.16257	-3.27964	-2.98733	-1.92565	3.92891	-0.419217	2.2586
LUSC	1.80528	0.74693	1.03183	-1.48209	1.91724	-0.344954	-0.610803	1.06612	0.791349	-1.18557	1.28741	0.931212	0.620712	1.264	-1.62611	0.660293	-0.529541	1.47085	1.636	-0.715636	2.66819	0.787617	-1.38034	-1.75018	0.41165	-0.458062	-0.654921	0.165954	0.779279	-0.321715	-0.808199	1.16354	-1.20847	-2.08948	-0.174913	0.49982	-0.195425	1.11876	-0.751347	-1.04278	1.9218	-1.98269	-0.278488	0.507351	-1.42913	-1.60476	0.682809	1.4873	1.28663
OV	1.41538	2.11163	-0.127425	-1.62908	-2.22049	-1.98261	-2.23062	-1.40499	-0.173598	-0.683342	1.23176	1.54981	-0.314777	0.0411783	-1.43722	-2.14102	1.46339	-1.03751	-1.16435	-2.47552	-1.69128	3.19036	-0.944034	-3.47698	-0.951923	-2.50442	-1.30368	-0.41951	2.39045	3.99609	-2.61396	2.14042	0.845287	1.04755	0.533227	2.76601	2.74342	2.2321	3.03964	0.561914	-0.243588	-4.37805	-2.27259	-3.32363	-1.24328	-0.0741448	2.0243	-0.648037	2.81746
PRAD	0.157105	-1.011	-0.685865	-0.752331	1.05027	-2.35744	-1.8373	-0.968656	-1.93325	-1.35933	-1.65352	-0.500594	-3.60123	-1.0672	-0.466852	-1.26375	-1.92479	0.870225	0.786565	0.78934	0.539222	-0.831179	-1.94592	-2.42075	-0.594486	-3.20784	-0.404652	-1.88352	-0.644373	-0.8588	-0.147446	-0.111979	0.644373	-0.68742	-0.81008	-0.82021	-1.72109	-1.50833	-1.95208	-0.393841	1.33727	-1.49461	-2.10751	-0.328273	-2.27528	-1.71341	-1.59226	-3.10933	-1.33958
SKCM	-4.89342	6.31457	0.319429	-4.22339	-3.19131	-2.49021	2.24249	-0.576924	4.90247	-0.246766	-1.88897	-5.21385	4.14045	-3.61363	-4.55231	3.69279	-0.767542	-2.81241	-3.42188	-1.17491	1.17645	-2.44456	-5.86725	5.17883	5.45803	0.81476	-0.489724	-1.17547	-1.35496	-0.344782	1.40044	1.46743	-3.6534	2.74011	-3.00468	-3.15986	-2.09444	0.766897	6.19042	7.28469	-1.95384	-0.552195	1.24137	1.63886	4.55806	-1.00525	-2.60703	4.03872	-4.65654
STAD	-1.77497	-1.08766	-0.340028	0.705375	-0.204332	1.6605	-1.13594	1.57455	0.0770319	-2.66316	1.23323	2.36457	-1.18854	0.553733	0.987547	0.370797	3.10585	0.180132	0.277134	1.14835	0.155118	1.13165	1.23047	-0.271364	0.810859	0.557553	-0.9068	0.827453	-0.947846	-0.418159	1.19455	-1.83955	-0.00408264	-4.06124	1.78484	2.82804	3.95522	1.46733	-0.956177	-3.54869	-1.01837	2.49397	1.4338	0.163288	0.266169	-0.91952	1.66019	3.26287	0.878868
THCA	2.05052	2.44586	1.41093	1.3672	0.132185	-1.37348	3.09291	0.630455	1.12119	0.945577	-1.48518	0.101524	0.161672	-0.207365	1.42885	0.31613	1.63735	-3.60906	-2.15438	-0.882815	-3.91152	-3.39923	-1.39136	0.620635	-0.948219	0.348149	1.00619	-0.960622	-0.960801	-0.454844	-0.204307	0.928408	-3.25788	0.533468	2.81349	0.418831	0.566668	-1.76627	1.39092	4.39603	-2.27612	-0.69587	0.035942	-0.0809218	0.269374	2.00002	-1.24614	-0.366054	-0.976622
UCEC	-3.90843	-3.06465	-1.6945	-0.013587	-1.71166	-1.94684	-2.55644	-0.603599	-1.88314	-1.31193	-0.445538	-1.99436	-1.08166	0.335702	0.0886077	-1.7983	-0.946274	-1.28825	-1.03726	-0.853686	-0.457613	-1.19221	0.147216	-2.55353	-1.87194	-2.87541	-0.892808	0.412593	-1.73787	0.377199	-1.12781	-1.85272	0.0826897	-1.31954	0.0209923	-2.71962	-1.94939	-1.20808	-0.0875868	-0.739039	0.44469	-3.42527	-4.52836	-0.167242	-1.70467	-2.03963	-1.60761	-3.5978	-1.93111
[truncated: 78 more columns]
