# Supplementary material for: Transcription Factor Activities Enhance Markers of Drug Sensitivity in Cancer
Source: Oxford University Press journal article supplement (doi:10.1158/0008-5472.can-17-1679), 2017-12-11
Supplement: 00085472can171679-sup-184371_2_supp_4394327_mzgxjn.xlsx [file 00085472can171679-sup-184371_2_supp_4394327_mzgxjn.xlsx]

## Sheet: table S4A
Table S4A. Manual classification of TP53 mutations.
Consequence	PROT_MUT	Nonsense	Non.Missense_disruptive	disruptive_.non_silent.	Coding_Silent	T125T_silent_hotspot	Indel_Frameshift	Indel_in.frame	R213	HS_Contact_248_or_273	R248	R248Q	R248W	R273	R273H	R273C	Com_missense_10Xaa	Com_missense_5res	Core_Hotspot_.175H.248Q_or_W.273C_or_H.	Zinc_binding_.missense_175_or_176.	R175_zinc_misense	R175H_.Zinc_binding.	Y220C_structural	G245S_structural	Myers_HNSCC_Binary	Str_A_L1_or_S_or_H2	Str_A_L2_or_L3	Str_A_C.term_or_tetramerisation	Str_A_NDBL_or_beta.sheets	Str_A_N.term_or_Transactivation	Str_A_SH3.like_or_Pro.rich	StrB_Helix_H2	StrB_Loop_L3	StrB_Helix_H4	StrB_Beta_Strand_S4	StrB_Beta_Strand_S1	StrB_Beta_Strand_S2.	StrB_Beta_Strand_S2	StrB_Helix_H1.Zinc_binding.stabilize_L2.L3_region	StrB_Loop_L2	StrB_Helix_H3	StrB_Beta_Strand_S9	StrB_Loop_L2.Zinc_binding.stabilize_L2.L3_region	StrB_Helix_H1	StrB_Helix_H7	StrB_Loop_L3.Zinc_binding	StrB_Beta_Strand_S7	StrB_Alpha_Helix	StrB_Helix_H5
nonsynonymous SNV	M1V	0	0	0	0	0	0	0	0	0	0	0	0	0	0	0	0	0	0	0	0	0	0	0	0	0	0	0	0	0	0	0	0	0	0	0	0	0	0	0	0	0	0	0	0	0	0	0	0
nonsynonymous SNV	E11K	0	0	0	0	0	0	0	0	0	0	0	0	0	0	0	0	0	0	0	0	0	0	0	0	0	0	0	0	0	0	0	0	0	0	0	0	0	0	0	0	0	0	0	0	0	0	0	0
nonsynonymous SNV	E11Q	0	0	0	0	0	0	0	0	0	0	0	0	0	0	0	0	0	0	0	0	0	0	0	0	0	0	0	0	0	0	0	0	0	0	0	0	0	0	0	0	0	0	0	0	0	0	0	0
nonsynonymous SNV	Q16L	0	0	0	0	0	0	0	0	0	0	0	0	0	0	0	0	0	0	0	0	0	0	0	0	0	0	0	0	0	0	0	0	0	0	0	0	0	0	0	0	0	0	0	0	0	0	0	0
frameshift deletion	L26fs	0	0	0	0	0	1	0	0	0	0	0	0	0	0	0	0	0	0	0	0	0	0	0	0	0	0	0	0	0	0	0	0	0	0	0	0	0	0	0	0	0	0	0	0	0	0	0	0
frameshift deletion	P27fs	0	0	0	0	0	1	0	0	0	0	0	0	0	0	0	0	0	0	0	0	0	0	0	0	0	0	0	0	0	0	0	0	0	0	0	0	0	0	0	0	0	0	0	0	0	0	0	0
nonsynonymous SNV	P27S	0	0	0	0	0	0	0	0	0	0	0	0	0	0	0	0	0	0	0	0	0	0	0	0	0	0	0	0	0	0	0	0	0	0	0	0	0	0	0	0	0	0	0	0	0	0	0	0
nonsynonymous SNV	P27L	0	0	0	0	0	0	0	0	0	0	0	0	0	0	0	0	0	0	0	0	0	0	0	0	0	0	0	0	0	0	0	0	0	0	0	0	0	0	0	0	0	0	0	0	0	0	0	0
frameshift insertion	E28fs	0	0	0	0	0	1	0	0	0	0	0	0	0	0	0	0	0	0	0	0	0	0	0	0	0	0	0	0	0	0	0	0	0	0	0	0	0	0	0	0	0	0	0	0	0	0	0	0
nonsynonymous SNV	V31I	0	0	0	0	0	0	0	0	0	0	0	0	0	0	0	0	0	0	0	0	0	0	0	0	0	0	0	0	1	0	0	0	0	0	0	0	0	0	0	0	0	0	0	0	0	0	0	0
frameshift insertion	S33fs	0	0	0	0	0	1	0	0	0	0	0	0	0	0	0	0	0	0	0	0	0	0	0	0	0	0	0	0	0	0	0	0	0	0	0	0	0	0	0	0	0	0	0	0	0	0	0	0
frameshift deletion	P34fs	0	0	0	0	0	1	0	0	0	0	0	0	0	0	0	0	0	0	0	0	0	0	0	0	0	0	0	0	0	0	0	0	0	0	0	0	0	0	0	0	0	0	0	0	0	0	0	0
frameshift deletion	P34fs	0	0	0	0	0	1	0	0	0	0	0	0	0	0	0	0	0	0	0	0	0	0	0	0	0	0	0	0	0	0	0	0	0	0	0	0	0	0	0	0	0	0	0	0	0	0	0	0
frameshift deletion	L35fs	0	0	0	0	0	1	0	0	0	0	0	0	0	0	0	0	0	0	0	0	0	0	0	0	0	0	0	0	0	0	0	0	0	0	0	0	0	0	0	0	0	0	0	0	0	0	0	0
frameshift insertion	L35fs	0	0	0	0	0	1	0	0	0	0	0	0	0	0	0	0	0	0	0	0	0	0	0	0	0	0	0	0	0	0	0	0	0	0	0	0	0	0	0	0	0	0	0	0	0	0	0	0
frameshift deletion	P36fs	0	0	0	0	0	1	0	0	0	0	0	0	0	0	0	0	0	0	0	0	0	0	0	0	0	0	0	0	0	0	0	0	0	0	0	0	0	0	0	0	0	0	0	0	0	0	0	0
nonsynonymous SNV	P36L	0	0	0	0	0	0	0	0	0	0	0	0	0	0	0	0	0	0	0	0	0	0	0	0	0	0	0	0	0	0	0	0	0	0	0	0	0	0	0	0	0	0	0	0	0	0	0	0
frameshift deletion	P36fs	0	0	0	0	0	1	0	0	0	0	0	0	0	0	0	0	0	0	0	0	0	0	0	0	0	0	0	0	0	0	0	0	0	0	0	0	0	0	0	0	0	0	0	0	0	0	0	0
nonsynonymous SNV	P36S	0	0	0	0	0	0	0	0	0	0	0	0	0	0	0	0	0	0	0	0	0	0	0	0	0	0	0	0	0	0	0	0	0	0	0	0	0	0	0	0	0	0	0	0	0	0	0	0
frameshift deletion	S37fs	0	0	0	0	0	1	0	0	0	0	0	0	0	0	0	0	0	0	0	0	0	0	0	0	0	0	0	0	0	0	0	0	0	0	0	0	0	0	0	0	0	0	0	0	0	0	0	0
frameshift deletion	Q38fs	0	0	0	0	0	1	0	0	0	0	0	0	0	0	0	0	0	0	0	0	0	0	0	0	0	0	0	0	0	0	0	0	0	0	0	0	0	0	0	0	0	0	0	0	0	0	0	0
stopgain	Q38X	1	0	0	0	0	0	0	0	0	0	0	0	0	0	0	0	0	0	0	0	0	0	0	0	0	0	0	0	0	0	0	0	0	0	0	0	0	0	0	0	0	0	0	0	0	0	0	0
stopgain	Q38X	1	0	0	0	0	0	0	0	0	0	0	0	0	0	0	0	0	0	0	0	0	0	0	0	0	0	0	0	0	0	0	0	0	0	0	0	0	0	0	0	0	0	0	0	0	0	0	0
frameshift deletion	D41fs	0	0	0	0	0	1	0	0	0	0	0	0	0	0	0	0	0	0	0	0	0	0	0	0	0	0	0	0	0	0	0	0	0	0	0	0	0	0	0	0	0	0	0	0	0	0	0	0
frameshift deletion	L43fs	0	0	0	0	0	1	0	0	0	0	0	0	0	0	0	0	0	0	0	0	0	0	0	0	0	0	0	0	0	0	0	0	0	0	0	0	0	0	0	0	0	0	0	0	0	0	0	0
stopgain	L43X	1	0	0	0	0	0	0	0	0	0	0	0	0	0	0	0	0	0	0	0	0	0	0	0	0	0	0	0	0	0	0	0	0	0	0	0	0	0	0	0	0	0	0	0	0	0	0	0
frameshift insertion	S46fs	0	0	0	0	0	1	0	0	0	0	0	0	0	0	0	0	0	0	0	0	0	0	0	0	0	0	0	0	0	0	0	0	0	0	0	0	0	0	0	0	0	0	0	0	0	0	0	0
frameshift deletion	P47fs	0	0	0	0	0	1	0	0	0	0	0	0	0	0	0	0	0	0	0	0	0	0	0	0	0	0	0	0	0	0	0	0	0	0	0	0	0	0	0	0	0	0	0	0	0	0	0	0
synonymous SNV	P47P	0	0	0	1	0	0	0	0	0	0	0	0	0	0	0	0	0	0	0	0	0	0	0	0	0	0	0	0	0	0	0	0	0	0	0	0	0	0	0	0	0	0	0	0	0	0	1	0
frameshift deletion	P47fs	0	0	0	0	0	1	0	0	0	0	0	0	0	0	0	0	0	0	0	0	0	0	0	0	0	0	0	0	0	0	0	0	0	0	0	0	0	0	0	0	0	0	0	0	0	0	0	0
frameshift deletion	D48fs	0	0	0	0	0	1	0	0	0	0	0	0	0	0	0	0	0	0	0	0	0	0	0	0	0	0	0	0	0	0	0	0	0	0	0	0	0	0	0	0	0	0	0	0	0	0	0	0
nonsynonymous SNV	D48N	0	0	0	0	0	0	0	0	0	0	0	0	0	0	0	0	0	0	0	0	0	0	0	0	0	0	0	0	0	0	0	0	0	0	0	0	0	0	0	0	0	0	0	0	0	0	0	0
frameshift deletion	D48fs	0	0	0	0	0	1	0	0	0	0	0	0	0	0	0	0	0	0	0	0	0	0	0	0	0	0	0	0	0	0	0	0	0	0	0	0	0	0	0	0	0	0	0	0	0	0	0	0
nonsynonymous SNV	D48N	0	0	0	0	0	0	0	0	0	0	0	0	0	0	0	0	0	0	0	0	0	0	0	0	0	0	0	0	0	0	0	0	0	0	0	0	0	0	0	0	0	0	0	0	0	0	0	0
frameshift deletion	D49fs	0	0	0	0	0	1	0	0	0	0	0	0	0	0	0	0	0	0	0	0	0	0	0	0	0	0	0	0	0	0	0	0	0	0	0	0	0	0	0	0	0	0	0	0	0	0	0	0
nonsynonymous SNV	D49H	0	0	0	0	0	0	0	0	0	0	0	0	0	0	0	0	0	0	0	0	0	0	0	0	0	0	0	0	0	0	0	0	0	0	0	0	0	0	0	0	0	0	0	0	0	0	0	0
stopgain	E51X	1	0	0	0	0	0	0	0	0	0	0	0	0	0	0	0	0	0	0	0	0	0	0	0	0	0	0	0	0	0	0	0	0	0	0	0	0	0	0	0	0	0	0	0	0	0	0	0
stopgain	Q52X	1	0	0	0	0	0	0	0	0	0	0	0	0	0	0	0	0	0	0	0	0	0	0	0	0	0	0	0	0	0	0	0	0	0	0	0	0	0	0	0	0	0	0	0	0	0	0	0
stopgain	Q52PX	1	0	0	0	0	0	0	0	0	0	0	0	0	0	0	0	0	0	0	0	0	0	0	0	0	0	0	0	0	0	0	0	0	0	0	0	0	0	0	0	0	0	0	0	0	0	0	0
frameshift deletion	Q52fs	0	0	0	0	0	1	0	0	0	0	0	0	0	0	0	0	0	0	0	0	0	0	0	0	0	0	0	0	0	0	0	0	0	0	0	0	0	0	0	0	0	0	0	0	0	0	0	0
stopgain	W53X	1	0	0	0	0	0	0	0	0	0	0	0	0	0	0	0	0	0	0	0	0	0	0	0	0	0	0	0	0	0	0	0	0	0	0	0	0	0	0	0	0	0	0	0	0	0	0	0
frameshift deletion	T55fs	0	0	0	0	0	1	0	0	0	0	0	0	0	0	0	0	0	0	0	0	0	0	0	0	0	0	0	0	0	0	0	0	0	0	0	0	0	0	0	0	0	0	0	0	0	0	0	0
stopgain	E56X	1	0	0	0	0	0	0	0	0	0	0	0	0	0	0	0	0	0	0	0	0	0	0	0	0	0	0	0	0	0	0	0	0	0	0	0	0	0	0	0	0	0	0	0	0	0	0	0
stopgain	E56X	1	0	0	0	0	0	0	0	0	0	0	0	0	0	0	0	0	0	0	0	0	0	0	0	0	0	0	0	0	0	0	0	0	0	0	0	0	0	0	0	0	0	0	0	0	0	0	0
frameshift deletion	P58fs	0	0	0	0	0	1	0	0	0	0	0	0	0	0	0	0	0	0	0	0	0	0	0	0	0	0	0	0	0	0	0	0	0	0	0	0	0	0	0	0	0	0	0	0	0	0	0	0
frameshift deletion	P58fs	0	0	0	0	0	1	0	0	0	0	0	0	0	0	0	0	0	0	0	0	0	0	0	0	0	0	0	0	0	0	0	0	0	0	0	0	0	0	0	0	0	0	0	0	0	0	0	0
frameshift deletion	P60fs	0	0	0	0	0	1	0	0	0	0	0	0	0	0	0	0	0	0	0	0	0	0	0	0	0	0	0	0	0	0	0	0	0	0	0	0	0	0	0	0	0	0	0	0	0	0	0	0
frameshift deletion	D61fs	0	0	0	0	0	1	0	0	0	0	0	0	0	0	0	0	0	0	0	0	0	0	0	0	0	0	0	0	0	0	0	0	0	0	0	0	0	0	0	0	0	0	0	0	0	0	0	0
nonsynonymous SNV	E62K	0	0	0	0	0	0	0	0	0	0	0	0	0	0	0	0	0	0	0	0	0	0	0	0	0	0	0	0	0	0	0	0	0	0	0	0	0	0	0	0	0	0	0	0	0	0	0	0
stopgain	E62X	1	0	0	0	0	0	0	0	0	0	0	0	0	0	0	0	0	0	0	0	0	0	0	0	0	0	0	0	0	0	0	0	0	0	0	0	0	0	0	0	0	0	0	0	0	0	0	0
nonsynonymous SNV	P64T	0	0	0	0	0	0	0	0	0	0	0	0	0	0	0	0	0	0	0	0	0	0	0	0	0	0	0	0	0	1	0	0	0	0	0	0	0	0	0	0	0	0	0	0	0	0	0	0
stopgain	R65X	1	0	0	0	0	0	0	0	0	0	0	0	0	0	0	0	0	0	0	0	0	0	0	0	0	0	0	0	0	0	0	0	0	0	0	0	0	0	0	0	0	0	0	0	0	0	0	0
stopgain	E68X	1	0	0	0	0	0	0	0	0	0	0	0	0	0	0	0	0	0	0	0	0	0	0	0	0	0	0	0	0	0	0	0	0	0	0	0	0	0	0	0	0	0	0	0	0	0	0	0
synonymous SNV	A69A	0	0	0	1	0	0	0	0	0	0	0	0	0	0	0	0	0	0	0	0	0	0	0	0	0	0	0	0	0	0	0	0	0	0	0	0	0	0	0	0	0	0	0	0	0	0	0	0
frameshift deletion	A70fs	0	0	0	0	0	1	0	0	0	0	0	0	0	0	0	0	0	0	0	0	0	0	0	0	0	0	0	0	0	0	0	0	0	0	0	0	0	0	0	0	0	0	0	0	0	0	0	0
frameshift deletion	P72fs	0	0	0	0	0	1	0	0	0	0	0	0	0	0	0	0	0	0	0	0	0	0	0	0	0	0	0	0	0	0	0	0	0	0	0	0	0	0	0	0	0	0	0	0	0	0	0	0
nonsynonymous SNV	P72R	0	0	0	0	0	0	0	0	0	0	0	0	0	0	0	0	0	0	0	0	0	0	0	0	0	0	0	0	0	1	0	0	0	0	0	0	0	0	0	0	0	0	0	0	0	0	0	0
nonsynonymous SNV	P72S	0	0	0	0	0	0	0	0	0	0	0	0	0	0	0	0	0	0	0	0	0	0	0	0	0	0	0	0	0	1	0	0	0	0	0	0	0	0	0	0	0	0	0	0	0	0	0	0
frameshift deletion	P72fs	0	0	0	0	0	1	0	0	0	0	0	0	0	0	0	0	0	0	0	0	0	0	0	0	0	0	0	0	0	0	0	0	0	0	0	0	0	0	0	0	0	0	0	0	0	0	0	0
frameshift deletion	V73fs	0	0	0	0	0	1	0	0	0	0	0	0	0	0	0	0	0	0	0	0	0	0	0	0	0	0	0	0	0	0	0	0	0	0	0	0	0	0	0	0	0	0	0	0	0	0	0	0
frameshift insertion	V73fs	0	0	0	0	0	1	0	0	0	0	0	0	0	0	0	0	0	0	0	0	0	0	0	0	0	0	0	0	0	0	0	0	0	0	0	0	0	0	0	0	0	0	0	0	0	0	0	0
frameshift deletion	A74fs	0	0	0	0	0	1	0	0	0	0	0	0	0	0	0	0	0	0	0	0	0	0	0	0	0	0	0	0	0	0	0	0	0	0	0	0	0	0	0	0	0	0	0	0	0	0	0	0
nonsynonymous SNV	A74S	0	0	0	0	0	0	0	0	0	0	0	0	0	0	0	0	0	0	0	0	0	0	0	0	0	0	0	0	0	1	0	0	0	0	0	0	0	0	0	0	0	0	0	0	0	0	0	0
frameshift deletion	P75fs	0	0	0	0	0	1	0	0	0	0	0	0	0	0	0	0	0	0	0	0	0	0	0	0	0	0	0	0	0	0	0	0	0	0	0	0	0	0	0	0	0	0	0	0	0	0	0	0
frameshift deletion	P75fs	0	0	0	0	0	1	0	0	0	0	0	0	0	0	0	0	0	0	0	0	0	0	0	0	0	0	0	0	0	0	0	0	0	0	0	0	0	0	0	0	0	0	0	0	0	0	0	0
frameshift insertion	A76fs	0	0	0	0	0	1	0	0	0	0	0	0	0	0	0	0	0	0	0	0	0	0	0	0	0	0	0	0	0	0	0	0	0	0	0	0	0	0	0	0	0	0	0	0	0	0	0	0
nonsynonymous SNV	P77L	0	0	0	0	0	0	0	0	0	0	0	0	0	0	0	0	0	0	0	0	0	0	0	0	0	0	0	0	0	1	0	0	0	0	0	0	0	0	0	0	0	0	0	0	0	0	0	0
frameshift insertion	P77fs	0	0	0	0	0	1	0	0	0	0	0	0	0	0	0	0	0	0	0	0	0	0	0	0	0	0	0	0	0	0	0	0	0	0	0	0	0	0	0	0	0	0	0	0	0	0	0	0
frameshift deletion	A78fs	0	0	0	0	0	1	0	0	0	0	0	0	0	0	0	0	0	0	0	0	0	0	0	0	0	0	0	0	0	0	0	0	0	0	0	0	0	0	0	0	0	0	0	0	0	0	0	0
frameshift deletion	P82fs	0	0	0	0	0	1	0	0	0	0	0	0	0	0	0	0	0	0	0	0	0	0	0	0	0	0	0	0	0	0	0	0	0	0	0	0	0	0	0	0	0	0	0	0	0	0	0	0
frameshift deletion	P85fs	0	0	0	0	0	1	0	0	0	0	0	0	0	0	0	0	0	0	0	0	0	0	0	0	0	0	0	0	0	0	0	0	0	0	0	0	0	0	0	0	0	0	0	0	0	0	0	0
frameshift insertion	P85fs	0	0	0	0	0	1	0	0	0	0	0	0	0	0	0	0	0	0	0	0	0	0	0	0	0	0	0	0	0	0	0	0	0	0	0	0	0	0	0	0	0	0	0	0	0	0	0	0
frameshift deletion	A86fs	0	0	0	0	0	1	0	0	0	0	0	0	0	0	0	0	0	0	0	0	0	0	0	0	0	0	0	0	0	0	0	0	0	0	0	0	0	0	0	0	0	0	0	0	0	0	0	0
synonymous SNV	A86A	0	0	0	1	0	0	0	0	0	0	0	0	0	0	0	0	0	0	0	0	0	0	0	0	0	0	0	0	0	0	0	0	0	0	0	0	0	0	0	0	0	0	0	0	0	0	0	0
frameshift deletion	P87fs	0	0	0	0	0	1	0	0	0	0	0	0	0	0	0	0	0	0	0	0	0	0	0	0	0	0	0	0	0	0	0	0	0	0	0	0	0	0	0	0	0	0	0	0	0	0	0	0
frameshift deletion	A88fs	0	0	0	0	0	1	0	0	0	0	0	0	0	0	0	0	0	0	0	0	0	0	0	0	0	0	0	0	0	0	0	0	0	0	0	0	0	0	0	0	0	0	0	0	0	0	0	0
frameshift deletion	P89fs	0	0	0	0	0	1	0	0	0	0	0	0	0	0	0	0	0	0	0	0	0	0	0	0	0	0	0	0	0	0	0	0	0	0	0	0	0	0	0	0	0	0	0	0	0	0	0	0
frameshift deletion	P89fs	0	0	0	0	0	1	0	0	0	0	0	0	0	0	0	0	0	0	0	0	0	0	0	0	0	0	0	0	0	0	0	0	0	0	0	0	0	0	0	0	0	0	0	0	0	0	0	0
frameshift deletion	S90fs	0	0	0	0	0	1	0	0	0	0	0	0	0	0	0	0	0	0	0	0	0	0	0	0	0	0	0	0	0	0	0	0	0	0	0	0	0	0	0	0	0	0	0	0	0	0	0	0
frameshift insertion	S90fs	0	0	0	0	0	1	0	0	0	0	0	0	0	0	0	0	0	0	0	0	0	0	0	0	0	0	0	0	0	0	0	0	0	0	0	0	0	0	0	0	0	0	0	0	0	0	0	0
stopgain	W91X	1	0	0	0	0	0	0	0	0	0	0	0	0	0	0	0	0	0	0	0	0	0	0	0	0	0	0	0	0	0	0	0	0	0	0	0	0	0	0	0	0	0	0	0	0	0	0	0
stopgain	W91X	1	0	0	0	0	0	0	0	0	0	0	0	0	0	0	0	0	0	0	0	0	0	0	0	0	0	0	0	0	0	0	0	0	0	0	0	0	0	0	0	0	0	0	0	0	0	0	0
frameshift deletion	L93fs	0	0	0	0	0	1	0	0	0	0	0	0	0	0	0	0	0	0	0	0	0	0	0	0	0	0	0	0	0	0	0	0	0	0	0	0	0	0	0	0	0	0	0	0	0	0	0	0
stopgain	S94X	1	0	0	0	0	0	0	0	0	0	0	0	0	0	0	0	0	0	0	0	0	0	0	0	0	0	0	0	0	0	0	0	0	0	0	0	0	0	0	0	0	0	0	0	0	0	0	0
stopgain	S94X	1	0	0	0	0	0	0	0	0	0	0	0	0	0	0	0	0	0	0	0	0	0	0	0	0	0	0	0	0	0	0	0	0	0	0	0	0	0	0	0	0	0	0	0	0	0	0	0
frameshift deletion	S96fs	0	0	0	0	0	1	0	0	0	0	0	0	0	0	0	0	0	0	0	0	0	0	0	0	0	0	0	0	0	0	0	0	0	0	0	0	0	0	0	0	0	0	0	0	0	0	0	0
frameshift deletion	V97fs	0	0	0	0	0	1	0	0	0	0	0	0	0	0	0	0	0	0	0	0	0	0	0	0	0	0	0	0	0	0	0	0	0	0	0	0	0	0	0	0	0	0	0	0	0	0	0	0
synonymous SNV	V97V	0	0	0	1	0	0	0	0	0	0	0	0	0	0	0	0	0	0	0	0	0	0	0	0	0	0	0	0	0	0	0	0	0	0	0	0	0	0	0	0	0	0	0	0	0	0	0	0
frameshift deletion	P98fs	0	0	0	0	0	1	0	0	0	0	0	0	0	0	0	0	0	0	0	0	0	0	0	0	0	0	0	0	0	0	0	0	0	0	0	0	0	0	0	0	0	0	0	0	0	0	0	0
nonsynonymous SNV	P98L	0	0	0	0	0	0	0	0	0	0	0	0	0	0	0	0	0	0	0	0	0	0	0	1	0	0	0	0	0	1	0	0	0	0	0	0	0	0	0	0	0	0	0	0	0	0	0	0
frameshift deletion	P98fs	0	0	0	0	0	1	0	0	0	0	0	0	0	0	0	0	0	0	0	0	0	0	0	0	0	0	0	0	0	0	0	0	0	0	0	0	0	0	0	0	0	0	0	0	0	0	0	0
frameshift deletion	S99fs	0	0	0	0	0	1	0	0	0	0	0	0	0	0	0	0	0	0	0	0	0	0	0	0	0	0	0	0	0	0	0	0	0	0	0	0	0	0	0	0	0	0	0	0	0	0	0	0
stopgain	Q100X	1	0	0	0	0	0	0	0	0	0	0	0	0	0	0	0	0	0	0	0	0	0	0	0	0	0	0	0	0	0	0	0	0	0	0	0	0	0	0	0	0	0	0	0	0	0	0	0
stopgain	Q100X	1	0	0	0	0	0	0	0	0	0	0	0	0	0	0	0	0	0	0	0	0	0	0	0	0	0	0	0	0	0	0	0	0	0	0	0	0	0	0	0	0	0	0	0	0	0	0	0
stopgain	K101X	1	0	0	0	0	0	0	0	0	0	0	0	0	0	0	0	0	0	0	0	0	0	0	0	0	0	0	0	0	0	0	0	0	0	0	0	0	0	0	0	0	0	0	0	0	0	0	0
frameshift deletion	K101fs	0	0	0	0	0	1	0	0	0	0	0	0	0	0	0	0	0	0	0	0	0	0	0	0	0	0	0	0	0	0	0	0	0	0	0	0	0	0	0	0	0	0	0	0	0	0	0	0
stopgain	K101X	1	0	0	0	0	0	0	0	0	0	0	0	0	0	0	0	0	0	0	0	0	0	0	0	0	0	0	0	0	0	0	0	0	0	0	0	0	0	0	0	0	0	0	0	0	0	0	0
frameshift deletion	T102fs	0	0	0	0	0	1	0	0	0	0	0	0	0	0	0	0	0	0	0	0	0	0	0	0	0	0	0	0	0	0	0	0	0	0	0	0	0	0	0	0	0	0	0	0	0	0	0	0
stopgain	Y103X	1	0	0	0	0	0	0	0	0	0	0	0	0	0	0	0	0	0	0	0	0	0	0	0	0	0	0	0	0	0	0	0	0	0	0	0	0	0	0	0	0	0	0	0	0	0	0	0
frameshift deletion	Y103fs	0	0	0	0	0	1	0	0	0	0	0	0	0	0	0	0	0	0	0	0	0	0	0	0	0	0	0	0	0	0	0	0	0	0	0	0	0	0	0	0	0	0	0	0	0	0	0	0
stopgain	Q104X	1	0	0	0	0	0	0	0	0	0	0	0	0	0	0	0	0	0	0	0	0	0	0	0	0	0	0	0	0	0	0	0	0	0	0	0	0	0	0	0	0	0	0	0	0	0	0	0
stopgain	Q104X	1	0	0	0	0	0	0	0	0	0	0	0	0	0	0	0	0	0	0	0	0	0	0	0	0	0	0	0	0	0	0	0	0	0	0	0	0	0	0	0	0	0	0	0	0	0	0	0
nonsynonymous SNV	G105D	0	0	0	0	0	0	0	0	0	0	0	0	0	0	0	0	0	0	0	0	0	0	0	0	0	0	0	0	0	0	0	0	0	0	0	0	0	0	0	0	0	0	0	0	0	0	0	0
nonsynonymous SNV	G105C	0	0	0	0	0	0	0	0	0	0	0	0	0	0	0	0	0	0	0	0	0	0	0	0	0	0	0	0	0	0	0	0	0	0	0	0	0	0	0	0	0	0	0	0	0	0	0	0
nonsynonymous SNV	G105R	0	0	0	0	0	0	0	0	0	0	0	0	0	0	0	0	0	0	0	0	0	0	0	0	0	0	0	0	0	0	0	0	0	0	0	0	0	0	0	0	0	0	0	0	0	0	0	0
nonsynonymous SNV	G105S	0	0	0	0	0	0	0	0	0	0	0	0	0	0	0	0	0	0	0	0	0	0	0	0	0	0	0	0	0	0	0	0	0	0	0	0	0	0	0	0	0	0	0	0	0	0	0	0
nonsynonymous SNV	S106R	0	0	0	0	0	0	0	0	0	0	0	0	0	0	0	0	0	0	0	0	0	0	0	0	0	0	0	0	0	0	0	0	0	0	0	0	0	0	0	0	0	0	0	0	0	0	0	0
nonsynonymous SNV	S106R	0	0	0	0	0	0	0	0	0	0	0	0	0	0	0	0	0	0	0	0	0	0	0	0	0	0	0	0	0	0	0	0	0	0	0	0	0	0	0	0	0	0	0	0	0	0	0	0
nonsynonymous SNV	Y107C	0	0	0	0	0	0	0	0	0	0	0	0	0	0	0	0	0	0	0	0	0	0	0	0	0	0	0	0	0	0	0	0	0	0	0	0	0	0	0	0	0	0	0	0	0	0	0	0
nonsynonymous SNV	Y107D	0	0	0	0	0	0	0	0	0	0	0	0	0	0	0	0	0	0	0	0	0	0	0	0	0	0	0	0	0	0	0	0	0	0	0	0	0	0	0	0	0	0	0	0	0	0	0	0
stopgain	Y107X	1	0	0	0	0	0	0	0	0	0	0	0	0	0	0	0	0	0	0	0	0	0	0	0	0	0	0	0	0	0	0	0	0	0	0	0	0	0	0	0	0	0	0	0	0	0	0	0
frameshift deletion	G108fs	0	0	0	0	0	1	0	0	0	0	0	0	0	0	0	0	0	0	0	0	0	0	0	0	0	0	0	0	0	0	0	0	0	0	0	0	0	0	0	0	0	0	0	0	0	0	0	0
nonframeshift deletion	108del	0	0	0	0	0	0	0	0	0	0	0	0	0	0	0	0	0	0	0	0	0	0	0	0	0	0	0	0	0	0	0	0	0	0	0	0	0	0	0	0	0	0	0	0	0	0	0	0
frameshift deletion	G108fs	0	0	0	0	0	1	0	0	0	0	0	0	0	0	0	0	0	0	0	0	0	0	0	0	0	0	0	0	0	0	0	0	0	0	0	0	0	0	0	0	0	0	0	0	0	0	0	0
frameshift insertion	F109fs	0	0	0	0	0	1	0	0	0	0	0	0	0	0	0	0	0	0	0	0	0	0	0	0	0	0	0	0	0	0	0	0	0	0	0	0	0	0	0	0	0	0	0	0	0	0	0	0
nonsynonymous SNV	F109C	0	0	0	0	0	0	0	0	0	0	0	0	0	0	0	0	0	0	0	0	0	0	0	0	0	0	0	0	0	0	0	0	0	0	1	0	0	0	0	0	0	0	0	0	0	0	0	0
nonsynonymous SNV	F109V	0	0	0	0	0	0	0	0	0	0	0	0	0	0	0	0	0	0	0	0	0	0	0	0	0	0	0	0	0	0	0	0	0	0	1	0	0	0	0	0	0	0	0	0	0	0	0	0
frameshift deletion	F109fs	0	0	0	0	0	1	0	0	0	0	0	0	0	0	0	0	0	0	0	0	0	0	0	0	0	0	0	0	0	0	0	0	0	0	0	0	0	0	0	0	0	0	0	0	0	0	0	0
frameshift deletion	R110fs	0	0	0	0	0	1	0	0	0	0	0	0	0	0	0	0	0	0	0	0	0	0	0	0	0	0	0	0	0	0	0	0	0	0	0	0	0	0	0	0	0	0	0	0	0	0	0	0
nonsynonymous SNV	R110L	0	0	0	0	0	0	0	0	0	0	0	0	0	0	0	1	1	0	0	0	0	0	0	0	0	0	0	1	0	0	0	0	0	0	1	0	0	0	0	0	0	0	0	0	0	0	0	0
nonsynonymous SNV	R110P	0	0	0	0	0	0	0	0	0	0	0	0	0	0	0	1	0	0	0	0	0	0	0	0	0	0	0	1	0	0	0	0	0	0	1	0	0	0	0	0	0	0	0	0	0	0	0	0
frameshift insertion	R110fs	0	0	0	0	0	1	0	0	0	0	0	0	0	0	0	0	0	0	0	0	0	0	0	0	0	0	0	0	0	0	0	0	0	0	0	0	0	0	0	0	0	0	0	0	0	0	0	0
nonsynonymous SNV	R110L	0	0	0	0	0	0	0	0	0	0	0	0	0	0	0	1	1	0	0	0	0	0	0	0	0	0	0	1	0	0	0	0	0	0	1	0	0	0	0	0	0	0	0	0	0	0	0	0
nonsynonymous SNV	R110P	0	0	0	0	0	0	0	0	0	0	0	0	0	0	0	1	0	0	0	0	0	0	0	0	0	0	0	1	0	0	0	0	0	0	1	0	0	0	0	0	0	0	0	0	0	0	0	0
nonsynonymous SNV	R110C	0	0	0	0	0	0	0	0	0	0	0	0	0	0	0	1	0	0	0	0	0	0	0	0	0	0	0	1	0	0	0	0	0	0	1	0	0	0	0	0	0	0	0	0	0	0	0	0
nonsynonymous SNV	L111R	0	0	0	0	0	0	0	0	0	0	0	0	0	0	0	0	0	0	0	0	0	0	0	0	0	0	0	0	0	0	0	0	0	0	1	0	0	0	0	0	0	0	0	0	0	0	0	0
nonsynonymous SNV	L111P	0	0	0	0	0	0	0	0	0	0	0	0	0	0	0	0	0	0	0	0	0	0	0	0	0	0	0	0	0	0	0	0	0	0	1	0	0	0	0	0	0	0	0	0	0	0	0	0
nonsynonymous SNV	L111Q	0	0	0	0	0	0	0	0	0	0	0	0	0	0	0	0	0	0	0	0	0	0	0	0	0	0	0	0	0	0	0	0	0	0	1	0	0	0	0	0	0	0	0	0	0	0	0	0
nonframeshift deletion	111del	0	0	0	0	0	0	0	0	0	0	0	0	0	0	0	0	0	0	0	0	0	0	0	0	0	0	0	0	0	0	0	0	0	0	0	0	0	0	0	0	0	0	0	0	0	0	0	0
nonsynonymous SNV	F113L	0	0	0	0	0	0	0	0	0	0	0	0	0	0	0	0	0	0	0	0	0	0	0	0	1	0	0	0	0	0	0	0	0	0	0	0	0	0	0	0	0	0	0	0	0	0	0	0
nonsynonymous SNV	F113C	0	0	0	0	0	0	0	0	0	0	0	0	0	0	0	0	0	0	0	0	0	0	0	1	1	0	0	1	0	0	0	0	0	0	0	0	0	0	0	0	0	0	0	0	0	0	0	0
nonsynonymous SNV	F113V	0	0	0	0	0	0	0	0	0	0	0	0	0	0	0	0	0	0	0	0	0	0	0	1	1	0	0	1	0	0	0	0	0	0	0	0	0	0	0	0	0	0	0	0	0	0	0	0
nonsynonymous SNV	F113C	0	0	0	0	0	0	0	0	0	0	0	0	0	0	0	0	0	0	0	0	0	0	0	1	1	0	0	1	0	0	0	0	0	0	0	0	0	0	0	0	0	0	0	0	0	0	0	0
nonsynonymous SNV	F113L	0	0	0	0	0	0	0	0	0	0	0	0	0	0	0	0	0	0	0	0	0	0	0	0	1	0	0	0	0	0	0	0	0	0	0	0	0	0	0	0	0	0	0	0	0	0	0	0
nonsynonymous SNV	F113V	0	0	0	0	0	0	0	0	0	0	0	0	0	0	0	0	0	0	0	0	0	0	0	1	1	0	0	1	0	0	0	0	0	0	0	0	0	0	0	0	0	0	0	0	0	0	0	0
stopgain	L114X	1	0	0	0	0	0	0	0	0	0	0	0	0	0	0	0	0	0	0	0	0	0	0	0	0	0	0	0	0	0	0	0	0	0	0	0	0	0	0	0	0	0	0	0	0	0	0	0
nonframeshift deletion	114del	0	0	0	0	0	0	0	0	0	0	0	0	0	0	0	0	0	0	0	0	0	0	0	0	0	0	0	0	0	0	0	0	0	0	0	0	0	0	0	0	0	0	0	0	0	0	0	0
nonframeshift deletion	115del	0	0	0	0	0	0	0	0	0	0	0	0	0	0	0	0	0	0	0	0	0	0	0	0	0	0	0	0	0	0	0	0	0	0	0	0	0	0	0	0	0	0	0	0	0	0	0	0
frameshift deletion	H115fs	0	0	0	0	0	1	0	0	0	0	0	0	0	0	0	0	0	0	0	0	0	0	0	0	0	0	0	0	0	0	0	0	0	0	0	0	0	0	0	0	0	0	0	0	0	0	0	0
frameshift deletion	G117fs	0	0	0	0	0	1	0	0	0	0	0	0	0	0	0	0	0	0	0	0	0	0	0	0	0	0	0	0	0	0	0	0	0	0	0	0	0	0	0	0	0	0	0	0	0	0	0	0
frameshift deletion	G117fs	0	0	0	0	0	1	0	0	0	0	0	0	0	0	0	0	0	0	0	0	0	0	0	0	0	0	0	0	0	0	0	0	0	0	0	0	0	0	0	0	0	0	0	0	0	0	0	0
frameshift insertion	T118fs	0	0	0	0	0	1	0	0	0	0	0	0	0	0	0	0	0	0	0	0	0	0	0	0	0	0	0	0	0	0	0	0	0	0	0	0	0	0	0	0	0	0	0	0	0	0	0	0
nonsynonymous SNV	K120E	0	0	0	0	0	0	0	0	0	0	0	0	0	0	0	0	0	0	0	0	0	0	0	0	1	0	0	0	0	0	0	0	0	0	0	0	0	0	0	0	0	0	0	0	0	0	0	0
nonsynonymous SNV	K120N	0	0	0	0	0	0	0	0	0	0	0	0	0	0	0	0	0	0	0	0	0	0	0	0	1	0	0	0	0	0	0	0	0	0	0	0	0	0	0	0	0	0	0	0	0	0	0	0
frameshift deletion	K120fs	0	0	0	0	0	1	0	0	0	0	0	0	0	0	0	0	0	0	0	0	0	0	0	0	0	0	0	0	0	0	0	0	0	0	0	0	0	0	0	0	0	0	0	0	0	0	0	0
stopgain	K120X	1	0	0	0	0	0	0	0	0	0	0	0	0	0	0	0	0	0	0	0	0	0	0	0	0	0	0	0	0	0	0	0	0	0	0	0	0	0	0	0	0	0	0	0	0	0	0	0
frameshift deletion	S121fs	0	0	0	0	0	1	0	0	0	0	0	0	0	0	0	0	0	0	0	0	0	0	0	0	0	0	0	0	0	0	0	0	0	0	0	0	0	0	0	0	0	0	0	0	0	0	0	0
frameshift deletion	V122fs	0	0	0	0	0	1	0	0	0	0	0	0	0	0	0	0	0	0	0	0	0	0	0	0	0	0	0	0	0	0	0	0	0	0	0	0	0	0	0	0	0	0	0	0	0	0	0	0
nonframeshift deletion	122del	0	0	0	0	0	0	0	0	0	0	0	0	0	0	0	0	0	0	0	0	0	0	0	0	0	0	0	0	0	0	0	0	0	0	0	0	0	0	0	0	0	0	0	0	0	0	0	0
stopgain	C124X	1	0	0	0	0	0	0	0	0	0	0	0	0	0	0	0	0	0	0	0	0	0	0	0	0	0	0	0	0	0	0	0	0	0	0	0	0	0	0	0	0	0	0	0	0	0	0	0
nonsynonymous SNV	C124G	0	0	0	0	0	0	0	0	0	0	0	0	0	0	0	0	0	0	0	0	0	0	0	0	1	0	0	0	0	0	0	0	0	0	0	0	1	0	0	0	0	0	0	0	0	0	0	0
nonsynonymous SNV	C124R	0	0	0	0	0	0	0	0	0	0	0	0	0	0	0	0	0	0	0	0	0	0	0	1	1	0	0	0	0	0	0	0	0	0	0	0	1	0	0	0	0	0	0	0	0	0	0	0
synonymous SNV	T125T	0	0	0	1	1	0	0	0	0	0	0	0	0	0	0	0	0	0	0	0	0	0	0	0	0	0	0	0	0	0	0	0	0	0	0	0	1	0	0	0	0	0	0	0	0	0	0	0
nonsynonymous SNV	T125M	0	0	0	0	0	0	0	0	0	0	0	0	0	0	0	0	0	0	0	0	0	0	0	0	1	0	0	0	0	0	0	0	0	0	0	0	1	0	0	0	0	0	0	0	0	0	0	0
nonsynonymous SNV	T125P	0	0	0	0	0	0	0	0	0	0	0	0	0	0	0	0	0	0	0	0	0	0	0	0	1	0	0	0	0	0	0	0	0	0	0	0	1	0	0	0	0	0	0	0	0	0	0	0
synonymous SNV	T125T	0	0	0	1	1	0	0	0	0	0	0	0	0	0	0	0	0	0	0	0	0	0	0	0	0	0	0	0	0	0	0	0	0	0	0	0	1	0	0	0	0	0	0	0	0	0	0	0
frameshift deletion	Y126fs	0	0	0	0	0	1	0	0	0	0	0	0	0	0	0	0	0	0	0	0	0	0	0	0	0	0	0	0	0	0	0	0	0	0	0	0	0	0	0	0	0	0	0	0	0	0	0	0
nonsynonymous SNV	Y126C	0	0	0	0	0	0	0	0	0	0	0	0	0	0	0	0	0	0	0	0	0	0	0	0	1	0	0	0	0	0	0	0	0	0	0	0	1	0	0	0	0	0	0	0	0	0	0	0
nonsynonymous SNV	Y126S	0	0	0	0	0	0	0	0	0	0	0	0	0	0	0	0	0	0	0	0	0	0	0	0	1	0	0	0	0	0	0	0	0	0	0	0	1	0	0	0	0	0	0	0	0	0	0	0
nonsynonymous SNV	Y126D	0	0	0	0	0	0	0	0	0	0	0	0	0	0	0	0	0	0	0	0	0	0	0	0	1	0	0	0	0	0	0	0	0	0	0	0	1	0	0	0	0	0	0	0	0	0	0	0
nonsynonymous SNV	Y126N	0	0	0	0	0	0	0	0	0	0	0	0	0	0	0	0	0	0	0	0	0	0	0	0	1	0	0	0	0	0	0	0	0	0	0	0	1	0	0	0	0	0	0	0	0	0	0	0
stopgain	Y126X	1	0	0	0	0	0	0	0	0	0	0	0	0	0	0	0	0	0	0	0	0	0	0	0	0	0	0	0	0	0	0	0	0	0	0	0	0	0	0	0	0	0	0	0	0	0	0	0
nonsynonymous SNV	Y126C	0	0	0	0	0	0	0	0	0	0	0	0	0	0	0	0	0	0	0	0	0	0	0	0	1	0	0	0	0	0	0	0	0	0	0	0	1	0	0	0	0	0	0	0	0	0	0	0
nonsynonymous SNV	Y126D	0	0	0	0	0	0	0	0	0	0	0	0	0	0	0	0	0	0	0	0	0	0	0	0	1	0	0	0	0	0	0	0	0	0	0	0	1	0	0	0	0	0	0	0	0	0	0	0
nonsynonymous SNV	S127F	0	0	0	0	0	0	0	0	0	0	0	0	0	0	0	0	0	0	0	0	0	0	0	0	1	0	0	0	0	0	0	0	0	0	0	0	0	0	0	0	0	0	0	0	0	0	0	0
nonsynonymous SNV	S127C	0	0	0	0	0	0	0	0	0	0	0	0	0	0	0	0	0	0	0	0	0	0	0	0	1	0	0	0	0	0	0	0	0	0	0	0	0	0	0	0	0	0	0	0	0	0	0	0
nonsynonymous SNV	S127Y	0	0	0	0	0	0	0	0	0	0	0	0	0	0	0	0	0	0	0	0	0	0	0	0	1	0	0	0	0	0	0	0	0	0	0	0	0	0	0	0	0	0	0	0	0	0	0	0
nonsynonymous SNV	S127P	0	0	0	0	0	0	0	0	0	0	0	0	0	0	0	0	0	0	0	0	0	0	0	0	1	0	0	0	0	0	0	0	0	0	0	0	0	0	0	0	0	0	0	0	0	0	0	0
nonsynonymous SNV	S127A	0	0	0	0	0	0	0	0	0	0	0	0	0	0	0	0	0	0	0	0	0	0	0	0	1	0	0	0	0	0	0	0	0	0	0	0	0	0	0	0	0	0	0	0	0	0	0	0
frameshift deletion	P128fs	0	0	0	0	0	1	0	0	0	0	0	0	0	0	0	0	0	0	0	0	0	0	0	0	0	0	0	0	0	0	0	0	0	0	0	0	0	0	0	0	0	0	0	0	0	0	0	0
nonframeshift deletion	128del	0	0	0	0	0	0	0	0	0	0	0	0	0	0	0	0	0	0	0	0	0	0	0	0	0	0	0	0	0	0	0	0	0	0	0	0	0	0	0	0	0	0	0	0	0	0	0	0
nonframeshift deletion	130del	0	0	0	0	0	0	0	0	0	0	0	0	0	0	0	0	0	0	0	0	0	0	0	0	0	0	0	0	0	0	0	0	0	0	0	0	0	0	0	0	0	0	0	0	0	0	0	0
nonsynonymous SNV	L130P	0	0	0	0	0	0	0	0	0	0	0	0	0	0	0	0	0	0	0	0	0	0	0	0	1	0	0	0	0	0	0	0	0	0	0	0	0	0	0	0	0	0	0	0	0	0	0	0
nonsynonymous SNV	L130F	0	0	0	0	0	0	0	0	0	0	0	0	0	0	0	0	0	0	0	0	0	0	0	0	1	0	0	0	0	0	0	0	0	0	0	0	0	0	0	0	0	0	0	0	0	0	0	0
nonsynonymous SNV	L130V	0	0	0	0	0	0	0	0	0	0	0	0	0	0	0	0	0	0	0	0	0	0	0	1	1	0	0	0	0	0	0	0	0	0	0	0	0	0	0	0	0	0	0	0	0	0	0	0
nonsynonymous SNV	L130V	0	0	0	0	0	0	0	0	0	0	0	0	0	0	0	0	0	0	0	0	0	0	0	1	1	0	0	0	0	0	0	0	0	0	0	0	0	0	0	0	0	0	0	0	0	0	0	0
frameshift deletion	N131fs	0	0	0	0	0	1	0	0	0	0	0	0	0	0	0	0	0	0	0	0	0	0	0	0	0	0	0	0	0	0	0	0	0	0	0	0	0	0	0	0	0	0	0	0	0	0	0	0
nonsynonymous SNV	K132N	0	0	0	0	0	0	0	0	0	0	0	0	0	0	0	1	0	0	0	0	0	0	0	1	1	0	0	0	0	0	0	0	0	0	0	1	0	0	0	0	0	0	0	0	0	0	0	0
nonsynonymous SNV	K132M	0	0	0	0	0	0	0	0	0	0	0	0	0	0	0	0	0	0	0	0	0	0	0	0	1	0	0	0	0	0	0	0	0	0	0	1	0	0	0	0	0	0	0	0	0	0	0	0
nonsynonymous SNV	K132R	0	0	0	0	0	0	0	0	0	0	0	0	0	0	0	1	0	0	0	0	0	0	0	0	1	0	0	0	0	0	0	0	0	0	0	1	0	0	0	0	0	0	0	0	0	0	0	0
nonsynonymous SNV	K132T	0	0	0	0	0	0	0	0	0	0	0	0	0	0	0	0	0	0	0	0	0	0	0	0	1	0	0	0	0	0	0	0	0	0	0	1	0	0	0	0	0	0	0	0	0	0	0	0
nonframeshift deletion	132del	0	0	0	0	0	0	0	0	0	0	0	0	0	0	0	0	0	0	0	0	0	0	0	0	0	0	0	0	0	0	0	0	0	0	0	0	0	0	0	0	0	0	0	0	0	0	0	0
nonsynonymous SNV	K132E	0	0	0	0	0	0	0	0	0	0	0	0	0	0	0	1	0	0	0	0	0	0	0	1	1	0	0	0	0	0	0	0	0	0	0	1	0	0	0	0	0	0	0	0	0	0	0	0
nonsynonymous SNV	K132N	0	0	0	0	0	0	0	0	0	0	0	0	0	0	0	1	0	0	0	0	0	0	0	1	1	0	0	0	0	0	0	0	0	0	0	1	0	0	0	0	0	0	0	0	0	0	0	0
nonsynonymous SNV	K132R	0	0	0	0	0	0	0	0	0	0	0	0	0	0	0	1	0	0	0	0	0	0	0	0	1	0	0	0	0	0	0	0	0	0	0	1	0	0	0	0	0	0	0	0	0	0	0	0
nonsynonymous SNV	K132T	0	0	0	0	0	0	0	0	0	0	0	0	0	0	0	0	0	0	0	0	0	0	0	0	1	0	0	0	0	0	0	0	0	0	0	1	0	0	0	0	0	0	0	0	0	0	0	0
nonsynonymous SNV	K132Q	0	0	0	0	0	0	0	0	0	0	0	0	0	0	0	1	0	0	0	0	0	0	0	1	1	0	0	0	0	0	0	0	0	0	0	1	0	0	0	0	0	0	0	0	0	0	0	0
nonsynonymous SNV	K132E	0	0	0	0	0	0	0	0	0	0	0	0	0	0	0	1	0	0	0	0	0	0	0	1	1	0	0	0	0	0	0	0	0	0	0	1	0	0	0	0	0	0	0	0	0	0	0	0
nonsynonymous SNV	M133K	0	0	0	0	0	0	0	0	0	0	0	0	0	0	0	0	0	0	0	0	0	0	0	1	1	0	0	0	0	0	0	0	0	0	0	1	0	0	0	0	0	0	0	0	0	0	0	0
synonymous SNV	M133M	0	0	0	1	0	0	0	0	0	0	0	0	0	0	0	0	0	0	0	0	0	0	0	0	0	0	0	0	0	0	0	0	0	0	0	1	0	0	0	0	0	0	0	0	0	0	0	0
nonsynonymous SNV	F134V	0	0	0	0	0	0	0	0	0	0	0	0	0	0	0	0	0	0	0	0	0	0	0	0	1	0	0	0	0	0	0	0	0	0	0	1	0	0	0	0	0	0	0	0	0	0	0	0
nonsynonymous SNV	F134L	0	0	0	0	0	0	0	0	0	0	0	0	0	0	0	0	0	0	0	0	0	0	0	0	1	0	0	0	0	0	0	0	0	0	0	1	0	0	0	0	0	0	0	0	0	0	0	0
frameshift deletion	F134fs	0	0	0	0	0	1	0	0	0	0	0	0	0	0	0	0	0	0	0	0	0	0	0	0	0	0	0	0	0	0	0	0	0	0	0	0	0	0	0	0	0	0	0	0	0	0	0	0
nonsynonymous SNV	C135W	0	0	0	0	0	0	0	0	0	0	0	0	0	0	0	0	0	0	0	0	0	0	0	0	1	0	0	0	0	0	0	0	0	0	0	1	0	0	0	0	0	0	0	0	0	0	0	0
stopgain	C135X	1	0	0	0	0	0	0	0	0	0	0	0	0	0	0	0	0	0	0	0	0	0	0	0	0	0	0	0	0	0	0	0	0	0	0	0	0	0	0	0	0	0	0	0	0	0	0	0
nonsynonymous SNV	C135F	0	0	0	0	0	0	0	0	0	0	0	0	0	0	0	1	1	0	0	0	0	0	0	1	1	0	0	0	0	0	0	0	0	0	0	1	0	0	0	0	0	0	0	0	0	0	0	0
nonsynonymous SNV	C135S	0	0	0	0	0	0	0	0	0	0	0	0	0	0	0	0	0	0	0	0	0	0	0	0	1	0	0	0	0	0	0	0	0	0	0	1	0	0	0	0	0	0	0	0	0	0	0	0
nonsynonymous SNV	C135Y	0	0	0	0	0	0	0	0	0	0	0	0	0	0	0	1	0	0	0	0	0	0	0	1	1	0	0	0	0	0	0	0	0	0	0	1	0	0	0	0	0	0	0	0	0	0	0	0
frameshift deletion	C135fs	0	0	0	0	0	1	0	0	0	0	0	0	0	0	0	0	0	0	0	0	0	0	0	0	0	0	0	0	0	0	0	0	0	0	0	0	0	0	0	0	0	0	0	0	0	0	0	0
nonsynonymous SNV	C135R	0	0	0	0	0	0	0	0	0	0	0	0	0	0	0	1	0	0	0	0	0	0	0	1	1	0	0	0	0	0	0	0	0	0	0	1	0	0	0	0	0	0	0	0	0	0	0	0
frameshift insertion	C135fs	0	0	0	0	0	1	0	0	0	0	0	0	0	0	0	0	0	0	0	0	0	0	0	0	0	0	0	0	0	0	0	0	0	0	0	0	0	0	0	0	0	0	0	0	0	0	0	0
nonsynonymous SNV	C135F	0	0	0	0	0	0	0	0	0	0	0	0	0	0	0	1	1	0	0	0	0	0	0	1	1	0	0	0	0	0	0	0	0	0	0	1	0	0	0	0	0	0	0	0	0	0	0	0
nonsynonymous SNV	C135Y	0	0	0	0	0	0	0	0	0	0	0	0	0	0	0	1	0	0	0	0	0	0	0	1	1	0	0	0	0	0	0	0	0	0	0	1	0	0	0	0	0	0	0	0	0	0	0	0
frameshift deletion	C135fs	0	0	0	0	0	1	0	0	0	0	0	0	0	0	0	0	0	0	0	0	0	0	0	0	0	0	0	0	0	0	0	0	0	0	0	0	0	0	0	0	0	0	0	0	0	0	0	0
nonsynonymous SNV	C135R	0	0	0	0	0	0	0	0	0	0	0	0	0	0	0	1	0	0	0	0	0	0	0	1	1	0	0	0	0	0	0	0	0	0	0	1	0	0	0	0	0	0	0	0	0	0	0	0
nonsynonymous SNV	Q136H	0	0	0	0	0	0	0	0	0	0	0	0	0	0	0	0	0	0	0	0	0	0	0	0	1	0	0	0	0	0	0	0	0	0	0	1	0	0	0	0	0	0	0	0	0	0	0	0
nonsynonymous SNV	Q136P	0	0	0	0	0	0	0	0	0	0	0	0	0	0	0	0	0	0	0	0	0	0	0	0	1	0	0	0	0	0	0	0	0	0	0	1	0	0	0	0	0	0	0	0	0	0	0	0
stopgain	Q136X	1	0	0	0	0	0	0	0	0	0	0	0	0	0	0	0	0	0	0	0	0	0	0	0	0	0	0	0	0	0	0	0	0	0	0	0	0	0	0	0	0	0	0	0	0	0	0	0
nonsynonymous SNV	Q136E	0	0	0	0	0	0	0	0	0	0	0	0	0	0	0	0	0	0	0	0	0	0	0	0	1	0	0	0	0	0	0	0	0	0	0	1	0	0	0	0	0	0	0	0	0	0	0	0
stopgain	Q136X	1	0	0	0	0	0	0	0	0	0	0	0	0	0	0	0	0	0	0	0	0	0	0	0	0	0	0	0	0	0	0	0	0	0	0	0	0	0	0	0	0	0	0	0	0	0	0	0
nonsynonymous SNV	L137Q	0	0	0	0	0	0	0	0	0	0	0	0	0	0	0	0	0	0	0	0	0	0	0	0	0	0	0	0	0	0	0	0	0	0	0	0	0	0	0	0	0	0	0	0	0	0	0	0
frameshift deletion	A138fs	0	0	0	0	0	1	0	0	0	0	0	0	0	0	0	0	0	0	0	0	0	0	0	0	0	0	0	0	0	0	0	0	0	0	0	0	0	0	0	0	0	0	0	0	0	0	0	0
nonsynonymous SNV	A138V	0	0	0	0	0	0	0	0	0	0	0	0	0	0	0	0	0	0	0	0	0	0	0	0	0	0	0	1	0	0	0	0	0	0	0	0	0	0	0	0	0	0	0	0	0	0	0	0
nonsynonymous SNV	A138P	0	0	0	0	0	0	0	0	0	0	0	0	0	0	0	0	0	0	0	0	0	0	0	0	0	0	0	1	0	0	0	0	0	0	0	0	0	0	0	0	0	0	0	0	0	0	0	0
frameshift deletion	A138fs	0	0	0	0	0	1	0	0	0	0	0	0	0	0	0	0	0	0	0	0	0	0	0	0	0	0	0	0	0	0	0	0	0	0	0	0	0	0	0	0	0	0	0	0	0	0	0	0
nonsynonymous SNV	A138P	0	0	0	0	0	0	0	0	0	0	0	0	0	0	0	0	0	0	0	0	0	0	0	0	0	0	0	1	0	0	0	0	0	0	0	0	0	0	0	0	0	0	0	0	0	0	0	0
frameshift deletion	K139fs	0	0	0	0	0	1	0	0	0	0	0	0	0	0	0	0	0	0	0	0	0	0	0	0	0	0	0	0	0	0	0	0	0	0	0	0	0	0	0	0	0	0	0	0	0	0	0	0
nonsynonymous SNV	K139N	0	0	0	0	0	0	0	0	0	0	0	0	0	0	0	0	0	0	0	0	0	0	0	0	0	0	0	0	0	0	0	0	0	0	0	0	0	0	0	0	0	0	0	0	0	0	0	0
frameshift deletion	T140fs	0	0	0	0	0	1	0	0	0	0	0	0	0	0	0	0	0	0	0	0	0	0	0	0	0	0	0	0	0	0	0	0	0	0	0	0	0	0	0	0	0	0	0	0	0	0	0	0
nonsynonymous SNV	C141W	0	0	0	0	0	0	0	0	0	0	0	0	0	0	0	0	0	0	0	0	0	0	0	1	0	0	0	1	0	0	0	0	0	0	0	0	0	0	0	0	0	0	0	0	0	0	0	0
stopgain	C141X	1	0	0	0	0	0	0	0	0	0	0	0	0	0	0	0	0	0	0	0	0	0	0	0	0	0	0	0	0	0	0	0	0	0	0	0	0	0	0	0	0	0	0	0	0	0	0	0
nonsynonymous SNV	C141S	0	0	0	0	0	0	0	0	0	0	0	0	0	0	0	0	0	0	0	0	0	0	0	0	0	0	0	1	0	0	0	0	0	0	0	0	0	0	0	0	0	0	0	0	0	0	0	0
nonsynonymous SNV	C141Y	0	0	0	0	0	0	0	0	0	0	0	0	0	0	0	0	0	0	0	0	0	0	0	0	0	0	0	1	0	0	0	0	0	0	0	0	0	0	0	0	0	0	0	0	0	0	0	0
nonsynonymous SNV	C141G	0	0	0	0	0	0	0	0	0	0	0	0	0	0	0	0	0	0	0	0	0	0	0	0	0	0	0	1	0	0	0	0	0	0	0	0	0	0	0	0	0	0	0	0	0	0	0	0
nonsynonymous SNV	C141R	0	0	0	0	0	0	0	0	0	0	0	0	0	0	0	0	0	0	0	0	0	0	0	0	0	0	0	1	0	0	0	0	0	0	0	0	0	0	0	0	0	0	0	0	0	0	0	0
nonsynonymous SNV	C141W	0	0	0	0	0	0	0	0	0	0	0	0	0	0	0	0	0	0	0	0	0	0	0	1	0	0	0	1	0	0	0	0	0	0	0	0	0	0	0	0	0	0	0	0	0	0	0	0
nonframeshift deletion	142del	0	0	0	0	0	0	0	0	0	0	0	0	0	0	0	0	0	0	0	0	0	0	0	0	0	0	0	0	0	0	0	0	0	0	0	0	0	0	0	0	0	0	0	0	0	0	0	0
frameshift deletion	V143fs	0	0	0	0	0	1	0	0	0	0	0	0	0	0	0	0	0	0	0	0	0	0	0	0	0	0	0	0	0	0	0	0	0	0	0	0	0	0	0	0	0	0	0	0	0	0	0	0
nonsynonymous SNV	V143G	0	0	0	0	0	0	0	0	0	0	0	0	0	0	0	0	0	0	0	0	0	0	0	0	0	0	0	1	0	0	0	0	0	0	0	0	0	0	0	0	0	0	0	0	0	0	0	0
nonsynonymous SNV	V143A	0	0	0	0	0	0	0	0	0	0	0	0	0	0	0	0	0	0	0	0	0	0	0	0	0	0	0	1	0	0	0	0	0	0	0	0	0	0	0	0	0	0	0	0	0	0	0	0
nonsynonymous SNV	V143E	0	0	0	0	0	0	0	0	0	0	0	0	0	0	0	0	0	0	0	0	0	0	0	0	0	0	0	1	0	0	0	0	0	0	0	0	0	0	0	0	0	0	0	0	0	0	0	0
nonsynonymous SNV	V143M	0	0	0	0	0	0	0	0	0	0	0	0	0	0	0	0	0	0	0	0	0	0	0	0	0	0	0	1	0	0	0	0	0	0	0	0	0	0	0	0	0	0	0	0	0	0	0	0
nonsynonymous SNV	V143A	0	0	0	0	0	0	0	0	0	0	0	0	0	0	0	0	0	0	0	0	0	0	0	0	0	0	0	1	0	0	0	0	0	0	0	0	0	0	0	0	0	0	0	0	0	0	0	0
nonsynonymous SNV	V143M	0	0	0	0	0	0	0	0	0	0	0	0	0	0	0	0	0	0	0	0	0	0	0	0	0	0	0	1	0	0	0	0	0	0	0	0	0	0	0	0	0	0	0	0	0	0	0	0
nonsynonymous SNV	Q144H	0	0	0	0	0	0	0	0	0	0	0	0	0	0	0	0	0	0	0	0	0	0	0	0	0	0	0	0	0	0	0	0	0	0	0	0	0	0	0	0	0	0	0	0	0	0	0	0
nonsynonymous SNV	Q144L	0	0	0	0	0	0	0	0	0	0	0	0	0	0	0	0	0	0	0	0	0	0	0	0	0	0	0	0	0	0	0	0	0	0	0	0	0	0	0	0	0	0	0	0	0	0	0	0
frameshift insertion	Q144fs	0	0	0	0	0	1	0	0	0	0	0	0	0	0	0	0	0	0	0	0	0	0	0	0	0	0	0	0	0	0	0	0	0	0	0	0	0	0	0	0	0	0	0	0	0	0	0	0
stopgain	Q144X	1	0	0	0	0	0	0	0	0	0	0	0	0	0	0	0	0	0	0	0	0	0	0	0	0	0	0	0	0	0	0	0	0	0	0	0	0	0	0	0	0	0	0	0	0	0	0	0
stopgain	Q144X	1	0	0	0	0	0	0	0	0	0	0	0	0	0	0	0	0	0	0	0	0	0	0	0	0	0	0	0	0	0	0	0	0	0	0	0	0	0	0	0	0	0	0	0	0	0	0	0
nonsynonymous SNV	L145R	0	0	0	0	0	0	0	0	0	0	0	0	0	0	0	0	0	0	0	0	0	0	0	0	0	0	0	0	0	0	0	0	0	0	0	0	0	0	0	0	0	0	0	0	0	0	0	0
nonsynonymous SNV	L145Q	0	0	0	0	0	0	0	0	0	0	0	0	0	0	0	0	0	0	0	0	0	0	0	0	0	0	0	0	0	0	0	0	0	0	0	0	0	0	0	0	0	0	0	0	0	0	0	0
synonymous SNV	L145L	0	0	0	1	0	0	0	0	0	0	0	0	0	0	0	0	0	0	0	0	0	0	0	0	0	0	0	0	0	0	0	0	0	0	0	0	0	0	0	0	0	0	0	0	0	0	0	0
nonsynonymous SNV	L145R	0	0	0	0	0	0	0	0	0	0	0	0	0	0	0	0	0	0	0	0	0	0	0	0	0	0	0	0	0	0	0	0	0	0	0	0	0	0	0	0	0	0	0	0	0	0	0	0
stopgain	W146X	1	0	0	0	0	0	0	0	0	0	0	0	0	0	0	0	0	0	0	0	0	0	0	0	0	0	0	0	0	0	0	0	0	0	0	0	0	0	0	0	0	0	0	0	0	0	0	0
nonsynonymous SNV	W146S	0	0	0	0	0	0	0	0	0	0	0	0	0	0	0	0	0	0	0	0	0	0	0	0	0	0	0	0	0	0	0	0	0	0	0	0	0	0	0	0	0	0	0	0	0	0	0	0
stopgain	W146X	1	0	0	0	0	0	0	0	0	0	0	0	0	0	0	0	0	0	0	0	0	0	0	0	0	0	0	0	0	0	0	0	0	0	0	0	0	0	0	0	0	0	0	0	0	0	0	0
frameshift deletion	V147fs	0	0	0	0	0	1	0	0	0	0	0	0	0	0	0	0	0	0	0	0	0	0	0	0	0	0	0	0	0	0	0	0	0	0	0	0	0	0	0	0	0	0	0	0	0	0	0	0
nonsynonymous SNV	V147D	0	0	0	0	0	0	0	0	0	0	0	0	0	0	0	0	0	0	0	0	0	0	0	1	0	0	0	0	0	0	0	0	0	0	0	0	0	0	0	0	0	0	0	0	0	0	0	0
nonsynonymous SNV	V147G	0	0	0	0	0	0	0	0	0	0	0	0	0	0	0	0	0	0	0	0	0	0	0	1	0	0	0	0	0	0	0	0	0	0	0	0	0	0	0	0	0	0	0	0	0	0	0	0
nonsynonymous SNV	D148N	0	0	0	0	0	0	0	0	0	0	0	0	0	0	0	0	0	0	0	0	0	0	0	0	0	0	0	0	0	0	0	0	0	0	0	0	0	0	0	0	0	0	0	0	0	0	0	0
nonframeshift deletion	149del	0	0	0	0	0	0	0	0	0	0	0	0	0	0	0	0	0	0	0	0	0	0	0	0	0	0	0	0	0	0	0	0	0	0	0	0	0	0	0	0	0	0	0	0	0	0	0	0
frameshift deletion	P151fs	0	0	0	0	0	1	0	0	0	0	0	0	0	0	0	0	0	0	0	0	0	0	0	0	0	0	0	0	0	0	0	0	0	0	0	0	0	0	0	0	0	0	0	0	0	0	0	0
nonsynonymous SNV	P151R	0	0	0	0	0	0	0	0	0	0	0	0	0	0	0	0	0	0	0	0	0	0	0	0	0	0	0	1	0	0	0	0	0	0	0	0	0	0	0	0	0	0	0	0	0	0	0	0
nonsynonymous SNV	P151H	0	0	0	0	0	0	0	0	0	0	0	0	0	0	0	0	0	0	0	0	0	0	0	0	0	0	0	1	0	0	0	0	0	0	0	0	0	0	0	0	0	0	0	0	0	0	0	0
nonsynonymous SNV	P151S	0	0	0	0	0	0	0	0	0	0	0	0	0	0	0	0	0	0	0	0	0	0	0	0	0	0	0	1	0	0	0	0	0	0	0	0	0	0	0	0	0	0	0	0	0	0	0	0
nonsynonymous SNV	P151A	0	0	0	0	0	0	0	0	0	0	0	0	0	0	0	0	0	0	0	0	0	0	0	0	0	0	0	1	0	0	0	0	0	0	0	0	0	0	0	0	0	0	0	0	0	0	0	0
nonsynonymous SNV	P151T	0	0	0	0	0	0	0	0	0	0	0	0	0	0	0	0	0	0	0	0	0	0	0	0	0	0	0	1	0	0	0	0	0	0	0	0	0	0	0	0	0	0	0	0	0	0	0	0
nonsynonymous SNV	P151H	0	0	0	0	0	0	0	0	0	0	0	0	0	0	0	0	0	0	0	0	0	0	0	0	0	0	0	1	0	0	0	0	0	0	0	0	0	0	0	0	0	0	0	0	0	0	0	0
nonsynonymous SNV	P151S	0	0	0	0	0	0	0	0	0	0	0	0	0	0	0	0	0	0	0	0	0	0	0	0	0	0	0	1	0	0	0	0	0	0	0	0	0	0	0	0	0	0	0	0	0	0	0	0
frameshift insertion	P151fs	0	0	0	0	0	1	0	0	0	0	0	0	0	0	0	0	0	0	0	0	0	0	0	0	0	0	0	0	0	0	0	0	0	0	0	0	0	0	0	0	0	0	0	0	0	0	0	0
frameshift insertion	P152fs	0	0	0	0	0	1	0	0	0	0	0	0	0	0	0	0	0	0	0	0	0	0	0	0	0	0	0	0	0	0	0	0	0	0	0	0	0	0	0	0	0	0	0	0	0	0	0	0
frameshift deletion	P152fs	0	0	0	0	0	1	0	0	0	0	0	0	0	0	0	0	0	0	0	0	0	0	0	0	0	0	0	0	0	0	0	0	0	0	0	0	0	0	0	0	0	0	0	0	0	0	0	0
nonsynonymous SNV	P152L	0	0	0	0	0	0	0	0	0	0	0	0	0	0	0	1	1	0	0	0	0	0	0	1	0	0	0	1	0	0	0	0	0	0	0	0	0	0	0	0	0	0	0	0	0	0	0	0
nonsynonymous SNV	P152R	0	0	0	0	0	0	0	0	0	0	0	0	0	0	0	0	0	0	0	0	0	0	0	0	0	0	0	1	0	0	0	0	0	0	0	0	0	0	0	0	0	0	0	0	0	0	0	0
nonsynonymous SNV	P152Q	0	0	0	0	0	0	0	0	0	0	0	0	0	0	0	0	0	0	0	0	0	0	0	0	0	0	0	1	0	0	0	0	0	0	0	0	0	0	0	0	0	0	0	0	0	0	0	0
nonsynonymous SNV	P152S	0	0	0	0	0	0	0	0	0	0	0	0	0	0	0	0	0	0	0	0	0	0	0	0	0	0	0	1	0	0	0	0	0	0	0	0	0	0	0	0	0	0	0	0	0	0	0	0
frameshift deletion	P152fs	0	0	0	0	0	1	0	0	0	0	0	0	0	0	0	0	0	0	0	0	0	0	0	0	0	0	0	0	0	0	0	0	0	0	0	0	0	0	0	0	0	0	0	0	0	0	0	0
synonymous SNV	P152P	0	0	0	1	0	0	0	0	0	0	0	0	0	0	0	0	0	0	0	0	0	0	0	0	0	0	0	1	0	0	0	0	0	0	0	0	0	0	0	0	0	0	0	0	0	0	0	0
nonsynonymous SNV	P152L	0	0	0	0	0	0	0	0	0	0	0	0	0	0	0	1	1	0	0	0	0	0	0	1	0	0	0	1	0	0	0	0	0	0	0	0	0	0	0	0	0	0	0	0	0	0	0	0
frameshift deletion	P153fs	0	0	0	0	0	1	0	0	0	0	0	0	0	0	0	0	0	0	0	0	0	0	0	0	0	0	0	0	0	0	0	0	0	0	0	0	0	0	0	0	0	0	0	0	0	0	0	0
frameshift deletion	G154fs	0	0	0	0	0	1	0	0	0	0	0	0	0	0	0	0	0	0	0	0	0	0	0	0	0	0	0	0	0	0	0	0	0	0	0	0	0	0	0	0	0	0	0	0	0	0	0	0
nonsynonymous SNV	G154V	0	0	0	0	0	0	0	0	0	0	0	0	0	0	0	0	0	0	0	0	0	0	0	1	0	0	0	1	0	0	0	0	0	0	0	0	0	0	0	0	0	0	0	0	0	0	0	0
nonsynonymous SNV	G154C	0	0	0	0	0	0	0	0	0	0	0	0	0	0	0	0	0	0	0	0	0	0	0	0	0	0	0	1	0	0	0	0	0	0	0	0	0	0	0	0	0	0	0	0	0	0	0	0
synonymous SNV	G154G	0	0	0	1	0	0	0	0	0	0	0	0	0	0	0	0	0	0	0	0	0	0	0	0	0	0	0	1	0	0	0	0	0	0	0	0	0	0	0	0	0	0	0	0	0	0	0	0
nonsynonymous SNV	G154V	0	0	0	0	0	0	0	0	0	0	0	0	0	0	0	0	0	0	0	0	0	0	0	1	0	0	0	1	0	0	0	0	0	0	0	0	0	0	0	0	0	0	0	0	0	0	0	0
synonymous SNV	T155T	0	0	0	1	0	0	0	0	0	0	0	0	0	0	0	0	0	0	0	0	0	0	0	0	0	0	0	1	0	0	0	0	0	0	0	0	0	0	0	0	0	0	0	0	0	0	0	0
nonsynonymous SNV	T155I	0	0	0	0	0	0	0	0	0	0	0	0	0	0	0	0	0	0	0	0	0	0	0	0	0	0	0	1	0	0	0	0	0	1	0	0	0	0	0	0	0	0	0	0	0	0	0	0
nonsynonymous SNV	T155N	0	0	0	0	0	0	0	0	0	0	0	0	0	0	0	0	0	0	0	0	0	0	0	0	0	0	0	1	0	0	0	0	0	1	0	0	0	0	0	0	0	0	0	0	0	0	0	0
nonsynonymous SNV	T155A	0	0	0	0	0	0	0	0	0	0	0	0	0	0	0	0	0	0	0	0	0	0	0	0	0	0	0	1	0	0	0	0	0	1	0	0	0	0	0	0	0	0	0	0	0	0	0	0
nonsynonymous SNV	T155P	0	0	0	0	0	0	0	0	0	0	0	0	0	0	0	0	0	0	0	0	0	0	0	0	0	0	0	1	0	0	0	0	0	1	0	0	0	0	0	0	0	0	0	0	0	0	0	0
nonsynonymous SNV	T155N	0	0	0	0	0	0	0	0	0	0	0	0	0	0	0	0	0	0	0	0	0	0	0	0	0	0	0	1	0	0	0	0	0	1	0	0	0	0	0	0	0	0	0	0	0	0	0	0
frameshift deletion	R156fs	0	0	0	0	0	1	0	0	0	0	0	0	0	0	0	0	0	0	0	0	0	0	0	0	0	0	0	0	0	0	0	0	0	0	0	0	0	0	0	0	0	0	0	0	0	0	0	0
nonframeshift deletion	156del	0	0	0	0	0	0	0	0	0	0	0	0	0	0	0	0	0	0	0	0	0	0	0	0	0	0	0	0	0	0	0	0	0	0	0	0	0	0	0	0	0	0	0	0	0	0	0	0
nonsynonymous SNV	R156P	0	0	0	0	0	0	0	0	0	0	0	0	0	0	0	0	0	0	0	0	0	0	0	0	0	0	0	1	0	0	0	0	0	1	0	0	0	0	0	0	0	0	0	0	0	0	0	0
nonsynonymous SNV	R156H	0	0	0	0	0	0	0	0	0	0	0	0	0	0	0	0	0	0	0	0	0	0	0	0	0	0	0	1	0	0	0	0	0	1	0	0	0	0	0	0	0	0	0	0	0	0	0	0
frameshift deletion	R156fs	0	0	0	0	0	1	0	0	0	0	0	0	0	0	0	0	0	0	0	0	0	0	0	0	0	0	0	0	0	0	0	0	0	0	0	0	0	0	0	0	0	0	0	0	0	0	0	0
nonsynonymous SNV	R156P	0	0	0	0	0	0	0	0	0	0	0	0	0	0	0	0	0	0	0	0	0	0	0	0	0	0	0	1	0	0	0	0	0	1	0	0	0	0	0	0	0	0	0	0	0	0	0	0
frameshift insertion	V157fs	0	0	0	0	0	1	0	0	0	0	0	0	0	0	0	0	0	0	0	0	0	0	0	0	0	0	0	0	0	0	0	0	0	0	0	0	0	0	0	0	0	0	0	0	0	0	0	0
nonsynonymous SNV	V157G	0	0	0	0	0	0	0	0	0	0	0	0	0	0	0	0	0	0	0	0	0	0	0	0	0	0	0	1	0	0	0	0	0	1	0	0	0	0	0	0	0	0	0	0	0	0	0	0
nonsynonymous SNV	V157F	0	0	0	0	0	0	0	0	0	0	0	0	0	0	0	1	1	0	0	0	0	0	0	0	0	0	0	1	0	0	0	0	0	1	0	0	0	0	0	0	0	0	0	0	0	0	0	0
nonsynonymous SNV	V157F	0	0	0	0	0	0	0	0	0	0	0	0	0	0	0	1	1	0	0	0	0	0	0	0	0	0	0	1	0	0	0	0	0	1	0	0	0	0	0	0	0	0	0	0	0	0	0	0
nonframeshift deletion	158del	0	0	0	0	0	0	0	0	0	0	0	0	0	0	0	0	0	0	0	0	0	0	0	0	0	0	0	0	0	0	0	0	0	0	0	0	0	0	0	0	0	0	0	0	0	0	0	0
nonsynonymous SNV	R158L	0	0	0	0	0	0	0	0	0	0	0	0	0	0	0	1	0	0	0	0	0	0	0	0	0	0	0	1	0	0	0	0	0	1	0	0	0	0	0	0	0	0	0	0	0	0	0	0
nonsynonymous SNV	R158P	0	0	0	0	0	0	0	0	0	0	0	0	0	0	0	1	0	0	0	0	0	0	0	0	0	0	0	1	0	0	0	0	0	1	0	0	0	0	0	0	0	0	0	0	0	0	0	0
nonsynonymous SNV	R158H	0	0	0	0	0	0	0	0	0	0	0	0	0	0	0	1	0	0	0	0	0	0	0	0	0	0	0	1	0	0	0	0	0	1	0	0	0	0	0	0	0	0	0	0	0	0	0	0
frameshift deletion	R158fs	0	0	0	0	0	1	0	0	0	0	0	0	0	0	0	0	0	0	0	0	0	0	0	0	0	0	0	0	0	0	0	0	0	0	0	0	0	0	0	0	0	0	0	0	0	0	0	0
nonsynonymous SNV	R158C	0	0	0	0	0	0	0	0	0	0	0	0	0	0	0	0	0	0	0	0	0	0	0	0	0	0	0	1	0	0	0	0	0	1	0	0	0	0	0	0	0	0	0	0	0	0	0	0
nonsynonymous SNV	R158G	0	0	0	0	0	0	0	0	0	0	0	0	0	0	0	1	0	0	0	0	0	0	0	0	0	0	0	1	0	0	0	0	0	1	0	0	0	0	0	0	0	0	0	0	0	0	0	0
nonsynonymous SNV	R158S	0	0	0	0	0	0	0	0	0	0	0	0	0	0	0	0	0	0	0	0	0	0	0	0	0	0	0	1	0	0	0	0	0	1	0	0	0	0	0	0	0	0	0	0	0	0	0	0
nonsynonymous SNV	R158H	0	0	0	0	0	0	0	0	0	0	0	0	0	0	0	1	0	0	0	0	0	0	0	0	0	0	0	1	0	0	0	0	0	1	0	0	0	0	0	0	0	0	0	0	0	0	0	0
nonsynonymous SNV	R158P	0	0	0	0	0	0	0	0	0	0	0	0	0	0	0	1	0	0	0	0	0	0	0	0	0	0	0	1	0	0	0	0	0	1	0	0	0	0	0	0	0	0	0	0	0	0	0	0
nonsynonymous SNV	R158L	0	0	0	0	0	0	0	0	0	0	0	0	0	0	0	1	0	0	0	0	0	0	0	0	0	0	0	1	0	0	0	0	0	1	0	0	0	0	0	0	0	0	0	0	0	0	0	0
nonsynonymous SNV	R158G	0	0	0	0	0	0	0	0	0	0	0	0	0	0	0	1	0	0	0	0	0	0	0	0	0	0	0	1	0	0	0	0	0	1	0	0	0	0	0	0	0	0	0	0	0	0	0	0
nonframeshift insertion	A159delinsVRA	0	0	0	0	0	0	0	0	0	0	0	0	0	0	0	0	0	0	0	0	0	0	0	0	0	0	0	0	0	0	0	0	0	0	0	0	0	0	0	0	0	0	0	0	0	0	0	0
nonsynonymous SNV	A159V	0	0	0	0	0	0	0	0	0	0	0	0	0	0	0	0	0	0	0	0	0	0	0	0	0	0	0	1	0	0	0	0	0	1	0	0	0	0	0	0	0	0	0	0	0	0	0	0
nonsynonymous SNV	A159P	0	0	0	0	0	0	0	0	0	0	0	0	0	0	0	0	0	0	0	0	0	0	0	0	0	0	0	1	0	0	0	0	0	1	0	0	0	0	0	0	0	0	0	0	0	0	0	0
nonsynonymous SNV	A159V	0	0	0	0	0	0	0	0	0	0	0	0	0	0	0	0	0	0	0	0	0	0	0	0	0	0	0	1	0	0	0	0	0	1	0	0	0	0	0	0	0	0	0	0	0	0	0	0
nonsynonymous SNV	A159D	0	0	0	0	0	0	0	0	0	0	0	0	0	0	0	0	0	0	0	0	0	0	0	1	0	0	0	1	0	0	0	0	0	1	0	0	0	0	0	0	0	0	0	0	0	0	0	0
nonsynonymous SNV	A161V	0	0	0	0	0	0	0	0	0	0	0	0	0	0	0	0	0	0	0	0	0	0	0	0	0	0	0	1	0	0	0	0	0	1	0	0	0	0	0	0	0	0	0	0	0	0	0	0
nonsynonymous SNV	A161S	0	0	0	0	0	0	0	0	0	0	0	0	0	0	0	0	0	0	0	0	0	0	0	0	0	0	0	1	0	0	0	0	0	1	0	0	0	0	0	0	0	0	0	0	0	0	0	0
nonsynonymous SNV	A161T	0	0	0	0	0	0	0	0	0	0	0	0	0	0	0	0	0	0	0	0	0	0	0	0	0	0	0	1	0	0	0	0	0	1	0	0	0	0	0	0	0	0	0	0	0	0	0	0
nonsynonymous SNV	A161D	0	0	0	0	0	0	0	0	0	0	0	0	0	0	0	0	0	0	0	0	0	0	0	1	0	0	0	1	0	0	0	0	0	1	0	0	0	0	0	0	0	0	0	0	0	0	0	0
nonsynonymous SNV	A161V	0	0	0	0	0	0	0	0	0	0	0	0	0	0	0	0	0	0	0	0	0	0	0	0	0	0	0	1	0	0	0	0	0	1	0	0	0	0	0	0	0	0	0	0	0	0	0	0
nonsynonymous SNV	A161T	0	0	0	0	0	0	0	0	0	0	0	0	0	0	0	0	0	0	0	0	0	0	0	0	0	0	0	1	0	0	0	0	0	1	0	0	0	0	0	0	0	0	0	0	0	0	0	0
nonframeshift deletion	162del	0	0	0	0	0	0	0	0	0	0	0	0	0	0	0	0	0	0	0	0	0	0	0	0	0	0	0	0	0	0	0	0	0	0	0	0	0	0	0	0	0	0	0	0	0	0	0	0
frameshift deletion	I162fs	0	0	0	0	0	1	0	0	0	0	0	0	0	0	0	0	0	0	0	0	0	0	0	0	0	0	0	0	0	0	0	0	0	0	0	0	0	0	0	0	0	0	0	0	0	0	0	0
nonsynonymous SNV	I162F	0	0	0	0	0	0	0	0	0	0	0	0	0	0	0	0	0	0	0	0	0	0	0	0	0	0	0	0	0	0	0	0	0	1	0	0	0	0	0	0	0	0	0	0	0	0	0	0
nonsynonymous SNV	I162N	0	0	0	0	0	0	0	0	0	0	0	0	0	0	0	0	0	0	0	0	0	0	0	0	0	0	0	0	0	0	0	0	0	1	0	0	0	0	0	0	0	0	0	0	0	0	0	0
nonsynonymous SNV	Y163C	0	0	0	0	0	0	0	0	0	0	0	0	0	0	0	0	0	0	0	0	0	0	0	0	0	1	0	1	0	0	0	0	0	1	0	0	0	0	1	0	0	0	0	0	0	0	0	0
nonframeshift insertion	Y163delinsIY	0	0	0	0	0	0	0	0	0	0	0	0	0	0	0	0	0	0	0	0	0	0	0	0	0	0	0	0	0	0	0	0	0	0	0	0	0	0	0	0	0	0	0	0	0	0	0	0
nonsynonymous SNV	Y163H	0	0	0	0	0	0	0	0	0	0	0	0	0	0	0	0	0	0	0	0	0	0	0	0	0	1	0	1	0	0	0	0	0	1	0	0	0	0	1	0	0	0	0	0	0	0	0	0
nonsynonymous SNV	Y163N	0	0	0	0	0	0	0	0	0	0	0	0	0	0	0	0	0	0	0	0	0	0	0	0	0	1	0	1	0	0	0	0	0	1	0	0	0	0	1	0	0	0	0	0	0	0	0	0
nonframeshift deletion	163del	0	0	0	0	0	0	0	0	0	0	0	0	0	0	0	0	0	0	0	0	0	0	0	0	0	0	0	0	0	0	0	0	0	0	0	0	0	0	0	0	0	0	0	0	0	0	0	0
nonsynonymous SNV	Y163C	0	0	0	0	0	0	0	0	0	0	0	0	0	0	0	0	0	0	0	0	0	0	0	0	0	1	0	1	0	0	0	0	0	1	0	0	0	0	1	0	0	0	0	0	0	0	0	0
nonsynonymous SNV	K164E	0	0	0	0	0	0	0	0	0	0	0	0	0	0	0	0	0	0	0	0	0	0	0	1	0	1	0	0	0	0	0	0	0	0	0	0	0	0	1	0	0	0	0	0	0	0	0	0
nonsynonymous SNV	K164N	0	0	0	0	0	0	0	0	0	0	0	0	0	0	0	0	0	0	0	0	0	0	0	0	0	1	0	0	0	0	0	0	0	0	0	0	0	0	1	0	0	0	0	0	0	0	0	0
nonsynonymous SNV	K164E	0	0	0	0	0	0	0	0	0	0	0	0	0	0	0	0	0	0	0	0	0	0	0	1	0	1	0	0	0	0	0	0	0	0	0	0	0	0	1	0	0	0	0	0	0	0	0	0
stopgain	K164X	1	0	0	0	0	0	0	0	0	0	0	0	0	0	0	0	0	0	0	0	0	0	0	0	0	0	0	0	0	0	0	0	0	0	0	0	0	0	0	0	0	0	0	0	0	0	0	0
frameshift deletion	Q165fs	0	0	0	0	0	1	0	0	0	0	0	0	0	0	0	0	0	0	0	0	0	0	0	0	0	0	0	0	0	0	0	0	0	0	0	0	0	0	0	0	0	0	0	0	0	0	0	0
stopgain	S166X	1	0	0	0	0	0	0	0	0	0	0	0	0	0	0	0	0	0	0	0	0	0	0	0	0	0	0	0	0	0	0	0	0	0	0	0	0	0	0	0	0	0	0	0	0	0	0	0
stopgain	S166X	1	0	0	0	0	0	0	0	0	0	0	0	0	0	0	0	0	0	0	0	0	0	0	0	0	0	0	0	0	0	0	0	0	0	0	0	0	0	0	0	0	0	0	0	0	0	0	0
nonframeshift insertion	S166delinsYKQS	0	0	0	0	0	0	0	0	0	0	0	0	0	0	0	0	0	0	0	0	0	0	0	0	0	0	0	0	0	0	0	0	0	0	0	0	0	0	0	0	0	0	0	0	0	0	0	0
frameshift deletion	Q167fs	0	0	0	0	0	1	0	0	0	0	0	0	0	0	0	0	0	0	0	0	0	0	0	0	0	0	0	0	0	0	0	0	0	0	0	0	0	0	0	0	0	0	0	0	0	0	0	0
stopgain	Q167X	1	0	0	0	0	0	0	0	0	0	0	0	0	0	0	0	0	0	0	0	0	0	0	0	0	0	0	0	0	0	0	0	0	0	0	0	0	0	0	0	0	0	0	0	0	0	0	0
stopgain	Q167X	1	0	0	0	0	0	0	0	0	0	0	0	0	0	0	0	0	0	0	0	0	0	0	0	0	0	0	0	0	0	0	0	0	0	0	0	0	0	0	0	0	0	0	0	0	0	0	0
frameshift deletion	H168fs	0	0	0	0	0	1	0	0	0	0	0	0	0	0	0	0	0	0	0	0	0	0	0	0	0	0	0	0	0	0	0	0	0	0	0	0	0	0	0	0	0	0	0	0	0	0	0	0
nonsynonymous SNV	H168L	0	0	0	0	0	0	0	0	0	0	0	0	0	0	0	0	0	0	0	0	0	0	0	0	0	1	0	0	0	0	0	0	0	0	0	0	0	0	1	0	0	0	0	0	0	0	0	0
nonsynonymous SNV	H168R	0	0	0	0	0	0	0	0	0	0	0	0	0	0	0	0	0	0	0	0	0	0	0	0	0	1	0	0	0	0	0	0	0	0	0	0	0	0	1	0	0	0	0	0	0	0	0	0
nonsynonymous SNV	H168P	0	0	0	0	0	0	0	0	0	0	0	0	0	0	0	0	0	0	0	0	0	0	0	0	0	1	0	0	0	0	0	0	0	0	0	0	0	0	1	0	0	0	0	0	0	0	0	0
nonsynonymous SNV	M169I	0	0	0	0	0	0	0	0	0	0	0	0	0	0	0	0	0	0	0	0	0	0	0	0	0	1	0	0	0	0	0	0	0	0	0	0	0	0	1	0	0	0	0	0	0	0	0	0
nonsynonymous SNV	M169T	0	0	0	0	0	0	0	0	0	0	0	0	0	0	0	0	0	0	0	0	0	0	0	0	0	1	0	0	0	0	0	0	0	0	0	0	0	0	1	0	0	0	0	0	0	0	0	0
frameshift deletion	E171fs	0	0	0	0	0	1	0	0	0	0	0	0	0	0	0	0	0	0	0	0	0	0	0	0	0	0	0	0	0	0	0	0	0	0	0	0	0	0	0	0	0	0	0	0	0	0	0	0
nonsynonymous SNV	E171D	0	0	0	0	0	0	0	0	0	0	0	0	0	0	0	0	0	0	0	0	0	0	0	0	0	1	0	0	0	0	0	0	0	0	0	0	0	0	1	0	0	0	0	0	0	0	0	0
stopgain	E171X	1	0	0	0	0	0	0	0	0	0	0	0	0	0	0	0	0	0	0	0	0	0	0	0	0	0	0	0	0	0	0	0	0	0	0	0	0	0	0	0	0	0	0	0	0	0	0	0
nonsynonymous SNV	E171K	0	0	0	0	0	0	0	0	0	0	0	0	0	0	0	0	0	0	0	0	0	0	0	0	0	1	0	0	0	0	0	0	0	0	0	0	0	0	1	0	0	0	0	0	0	0	0	0
nonsynonymous SNV	E171K	0	0	0	0	0	0	0	0	0	0	0	0	0	0	0	0	0	0	0	0	0	0	0	0	0	1	0	0	0	0	0	0	0	0	0	0	0	0	1	0	0	0	0	0	0	0	0	0
frameshift deletion	V172fs	0	0	0	0	0	1	0	0	0	0	0	0	0	0	0	0	0	0	0	0	0	0	0	0	0	0	0	0	0	0	0	0	0	0	0	0	0	0	0	0	0	0	0	0	0	0	0	0
nonsynonymous SNV	V172G	0	0	0	0	0	0	0	0	0	0	0	0	0	0	0	0	0	0	0	0	0	0	0	0	0	1	0	0	0	0	0	0	0	0	0	0	0	0	1	0	0	0	0	0	0	0	0	0
nonsynonymous SNV	V172F	0	0	0	0	0	0	0	0	0	0	0	0	0	0	0	0	0	0	0	0	0	0	0	0	0	1	0	0	0	0	0	0	0	0	0	0	0	0	1	0	0	0	0	0	0	0	0	0
nonframeshift deletion	172del	0	0	0	0	0	0	0	0	0	0	0	0	0	0	0	0	0	0	0	0	0	0	0	0	0	0	0	0	0	0	0	0	0	0	0	0	0	0	0	0	0	0	0	0	0	0	0	0
frameshift deletion	V173fs	0	0	0	0	0	1	0	0	0	0	0	0	0	0	0	0	0	0	0	0	0	0	0	0	0	0	0	0	0	0	0	0	0	0	0	0	0	0	0	0	0	0	0	0	0	0	0	0
nonsynonymous SNV	V173G	0	0	0	0	0	0	0	0	0	0	0	0	0	0	0	0	0	0	0	0	0	0	0	0	0	1	0	0	0	0	0	0	0	0	0	0	0	0	1	0	0	0	0	0	0	0	0	0
nonsynonymous SNV	V173A	0	0	0	0	0	0	0	0	0	0	0	0	0	0	0	0	0	0	0	0	0	0	0	0	0	1	0	0	0	0	0	0	0	0	0	0	0	0	1	0	0	0	0	0	0	0	0	0
nonsynonymous SNV	V173L	0	0	0	0	0	0	0	0	0	0	0	0	0	0	0	0	0	0	0	0	0	0	0	0	0	1	0	0	0	0	0	0	0	0	0	0	0	0	1	0	0	0	0	0	0	0	0	0
nonsynonymous SNV	V173M	0	0	0	0	0	0	0	0	0	0	0	0	0	0	0	0	0	0	0	0	0	0	0	1	0	1	0	0	0	0	0	0	0	0	0	0	0	0	1	0	0	0	0	0	0	0	0	0
nonsynonymous SNV	V173L	0	0	0	0	0	0	0	0	0	0	0	0	0	0	0	0	0	0	0	0	0	0	0	0	0	1	0	0	0	0	0	0	0	0	0	0	0	0	1	0	0	0	0	0	0	0	0	0
nonsynonymous SNV	V173M	0	0	0	0	0	0	0	0	0	0	0	0	0	0	0	0	0	0	0	0	0	0	0	1	0	1	0	0	0	0	0	0	0	0	0	0	0	0	1	0	0	0	0	0	0	0	0	0
frameshift deletion	R174fs	0	0	0	0	0	1	0	0	0	0	0	0	0	0	0	0	0	0	0	0	0	0	0	0	0	0	0	0	0	0	0	0	0	0	0	0	0	0	0	0	0	0	0	0	0	0	0	0
nonsynonymous SNV	R174W	0	0	0	0	0	0	0	0	0	0	0	0	0	0	0	0	0	0	0	0	0	0	0	0	0	1	0	0	0	0	0	0	0	0	0	0	0	0	1	0	0	0	0	0	0	0	0	0
frameshift deletion	R174fs	0	0	0	0	0	1	0	0	0	0	0	0	0	0	0	0	0	0	0	0	0	0	0	0	0	0	0	0	0	0	0	0	0	0	0	0	0	0	0	0	0	0	0	0	0	0	0	0
frameshift insertion	R174fs	0	0	0	0	0	1	0	0	0	0	0	0	0	0	0	0	0	0	0	0	0	0	0	0	0	0	0	0	0	0	0	0	0	0	0	0	0	0	0	0	0	0	0	0	0	0	0	0
nonframeshift deletion	174del	0	0	0	0	0	0	0	0	0	0	0	0	0	0	0	0	0	0	0	0	0	0	0	0	0	0	0	0	0	0	0	0	0	0	0	0	0	0	0	0	0	0	0	0	0	0	0	0
nonsynonymous SNV	R175H	0	0	0	0	0	0	0	0	0	0	0	0	0	0	0	1	1	0	0	0	0	0	0	1	0	1	0	0	0	0	0	0	0	0	0	0	0	0	1	0	0	0	0	0	0	0	0	0
nonsynonymous SNV	R175C	0	0	0	0	0	0	0	0	0	0	0	0	0	0	0	0	0	0	0	0	0	0	0	0	0	1	0	0	0	0	0	0	0	0	0	0	0	0	1	0	0	0	0	0	0	0	0	0
nonsynonymous SNV	R175G	0	0	0	0	0	0	0	0	0	0	0	0	0	0	0	0	0	0	0	0	0	0	0	0	0	1	0	0	0	0	0	0	0	0	0	0	0	0	1	0	0	0	0	0	0	0	0	0
nonsynonymous SNV	R175H	0	0	0	0	0	0	0	0	0	0	0	0	0	0	0	1	1	0	0	0	0	0	0	1	0	1	0	0	0	0	0	0	0	0	0	0	0	0	1	0	0	0	0	0	0	0	0	0
nonsynonymous SNV	R175L	0	0	0	0	0	0	0	0	0	0	0	0	0	0	0	1	0	0	0	0	0	0	0	1	0	1	0	0	0	0	0	0	0	0	0	0	0	0	1	0	0	0	0	0	0	0	0	0
frameshift deletion	R175fs	0	0	0	0	0	1	0	0	0	0	0	0	0	0	0	0	0	0	0	0	0	0	0	0	0	0	0	0	0	0	0	0	0	0	0	0	0	0	0	0	0	0	0	0	0	0	0	0
stopgain	C176X	1	0	0	0	0	0	0	0	0	0	0	0	0	0	0	0	0	0	0	0	0	0	0	0	0	0	0	0	0	0	0	0	0	0	0	0	0	0	0	0	0	0	0	0	0	0	0	0
nonsynonymous SNV	C176F	0	0	0	0	0	0	0	0	0	0	0	0	0	0	0	1	1	0	0	0	0	0	0	1	0	1	0	0	0	0	0	0	0	0	0	0	0	0	1	0	0	0	0	0	0	0	0	0
nonsynonymous SNV	C176S	0	0	0	0	0	0	0	0	0	0	0	0	0	0	0	1	0	0	0	0	0	0	0	1	0	1	0	0	0	0	0	0	0	0	0	0	0	0	1	0	0	0	0	0	0	0	0	0
nonsynonymous SNV	C176Y	0	0	0	0	0	0	0	0	0	0	0	0	0	0	0	1	0	0	0	0	0	0	0	1	0	1	0	0	0	0	0	0	0	0	0	0	0	0	1	0	0	0	0	0	0	0	0	0
nonsynonymous SNV	C176R	0	0	0	0	0	0	0	0	0	0	0	0	0	0	0	0	0	0	0	0	0	0	0	0	0	1	0	0	0	0	0	0	0	0	0	0	0	0	1	0	0	0	0	0	0	0	0	0
nonsynonymous SNV	C176W	0	0	0	0	0	0	0	0	0	0	0	0	0	0	0	1	0	0	0	0	0	0	0	1	0	1	0	0	0	0	0	0	0	0	0	0	0	0	1	0	0	0	0	0	0	0	0	0
nonsynonymous SNV	C176F	0	0	0	0	0	0	0	0	0	0	0	0	0	0	0	1	1	0	0	0	0	0	0	1	0	1	0	0	0	0	0	0	0	0	0	0	0	0	1	0	0	0	0	0	0	0	0	0
nonsynonymous SNV	C176Y	0	0	0	0	0	0	0	0	0	0	0	0	0	0	0	1	0	0	0	0	0	0	0	1	0	1	0	0	0	0	0	0	0	0	0	0	0	0	1	0	0	0	0	0	0	0	0	0
nonsynonymous SNV	C176S	0	0	0	0	0	0	0	0	0	0	0	0	0	0	0	1	0	0	0	0	0	0	0	1	0	1	0	0	0	0	0	0	0	0	0	0	0	0	1	0	0	0	0	0	0	0	0	0
frameshift deletion	P177fs	0	0	0	0	0	1	0	0	0	0	0	0	0	0	0	0	0	0	0	0	0	0	0	0	0	0	0	0	0	0	0	0	0	0	0	0	0	0	0	0	0	0	0	0	0	0	0	0
nonsynonymous SNV	P177L	0	0	0	0	0	0	0	0	0	0	0	0	0	0	0	0	0	0	0	0	0	0	0	0	0	1	0	0	0	0	0	0	0	0	0	0	0	0	0	0	0	0	1	0	0	0	0	0
nonsynonymous SNV	P177R	0	0	0	0	0	0	0	0	0	0	0	0	0	0	0	0	0	0	0	0	0	0	0	0	0	1	0	0	0	0	0	0	0	0	0	0	0	0	0	0	0	0	1	0	0	0	0	0
nonsynonymous SNV	P177L	0	0	0	0	0	0	0	0	0	0	0	0	0	0	0	0	0	0	0	0	0	0	0	0	0	1	0	0	0	0	0	0	0	0	0	0	0	0	0	0	0	0	1	0	0	0	0	0
nonsynonymous SNV	P177T	0	0	0	0	0	0	0	0	0	0	0	0	0	0	0	0	0	0	0	0	0	0	0	0	0	1	0	0	0	0	0	0	0	0	0	0	0	0	0	0	0	0	1	0	0	0	0	0
nonsynonymous SNV	H178Q	0	0	0	0	0	0	0	0	0	0	0	0	0	0	0	0	0	0	0	0	0	0	0	0	0	1	0	0	0	0	0	0	0	0	0	0	0	0	0	0	0	0	1	0	0	0	0	0
frameshift deletion	H178fs	0	0	0	0	0	1	0	0	0	0	0	0	0	0	0	0	0	0	0	0	0	0	0	0	0	0	0	0	0	0	0	0	0	0	0	0	0	0	0	0	0	0	0	0	0	0	0	0
nonsynonymous SNV	H178D	0	0	0	0	0	0	0	0	0	0	0	0	0	0	0	0	0	0	0	0	0	0	0	0	0	1	0	0	0	0	0	0	0	0	0	0	0	0	0	0	0	0	1	0	0	0	0	0
nonsynonymous SNV	H178N	0	0	0	0	0	0	0	0	0	0	0	0	0	0	0	0	0	0	0	0	0	0	0	0	0	1	0	0	0	0	0	0	0	0	0	0	0	0	0	0	0	0	1	0	0	0	0	0
nonsynonymous SNV	H179Q	0	0	0	0	0	0	0	0	0	0	0	0	0	0	0	1	0	0	0	0	0	0	0	1	0	1	0	0	0	0	0	0	0	0	0	0	0	0	0	0	0	0	1	0	0	0	0	0
nonsynonymous SNV	H179L	0	0	0	0	0	0	0	0	0	0	0	0	0	0	0	0	0	0	0	0	0	0	0	0	0	1	0	0	0	0	0	0	0	0	0	0	0	0	0	0	0	0	1	0	0	0	0	0
nonsynonymous SNV	H179R	0	0	0	0	0	0	0	0	0	0	0	0	0	0	0	1	0	0	0	0	0	0	0	1	0	1	0	0	0	0	0	0	0	0	0	0	0	0	0	0	0	0	1	0	0	0	0	0
nonsynonymous SNV	H179P	0	0	0	0	0	0	0	0	0	0	0	0	0	0	0	0	0	0	0	0	0	0	0	0	0	1	0	0	0	0	0	0	0	0	0	0	0	0	0	0	0	0	1	0	0	0	0	0
nonsynonymous SNV	H179Y	0	0	0	0	0	0	0	0	0	0	0	0	0	0	0	0	0	0	0	0	0	0	0	0	0	1	0	0	0	0	0	0	0	0	0	0	0	0	0	0	0	0	1	0	0	0	0	0
nonsynonymous SNV	H179D	0	0	0	0	0	0	0	0	0	0	0	0	0	0	0	1	0	0	0	0	0	0	0	1	0	1	0	0	0	0	0	0	0	0	0	0	0	0	0	0	0	0	1	0	0	0	0	0
nonsynonymous SNV	H179Q	0	0	0	0	0	0	0	0	0	0	0	0	0	0	0	1	0	0	0	0	0	0	0	1	0	1	0	0	0	0	0	0	0	0	0	0	0	0	0	0	0	0	1	0	0	0	0	0
nonsynonymous SNV	H179R	0	0	0	0	0	0	0	0	0	0	0	0	0	0	0	1	0	0	0	0	0	0	0	1	0	1	0	0	0	0	0	0	0	0	0	0	0	0	0	0	0	0	1	0	0	0	0	0
nonsynonymous SNV	H179D	0	0	0	0	0	0	0	0	0	0	0	0	0	0	0	1	0	0	0	0	0	0	0	1	0	1	0	0	0	0	0	0	0	0	0	0	0	0	0	0	0	0	1	0	0	0	0	0
nonsynonymous SNV	E180K	0	0	0	0	0	0	0	0	0	0	0	0	0	0	0	0	0	0	0	0	0	0	0	0	0	1	0	0	0	0	0	0	0	0	0	0	0	0	0	0	0	0	1	0	0	0	0	0
frameshift deletion	E180fs	0	0	0	0	0	1	0	0	0	0	0	0	0	0	0	0	0	0	0	0	0	0	0	0	0	0	0	0	0	0	0	0	0	0	0	0	0	0	0	0	0	0	0	0	0	0	0	0
stopgain	E180X	1	0	0	0	0	0	0	0	0	0	0	0	0	0	0	0	0	0	0	0	0	0	0	0	0	0	0	0	0	0	0	0	0	0	0	0	0	0	0	0	0	0	0	0	0	0	0	0
nonsynonymous SNV	R181P	0	0	0	0	0	0	0	0	0	0	0	0	0	0	0	0	0	0	0	0	0	0	0	0	0	1	0	0	0	0	0	0	0	0	0	0	0	0	0	0	0	0	1	0	0	0	0	0
nonsynonymous SNV	R181H	0	0	0	0	0	0	0	0	0	0	0	0	0	0	0	0	0	0	0	0	0	0	0	0	0	1	0	0	0	0	0	0	0	0	0	0	0	0	0	0	0	0	1	0	0	0	0	0
nonsynonymous SNV	R181C	0	0	0	0	0	0	0	0	0	0	0	0	0	0	0	0	0	0	0	0	0	0	0	0	0	1	0	0	0	0	0	0	0	0	0	0	0	0	0	0	0	0	1	0	0	0	0	0
nonsynonymous SNV	R181C	0	0	0	0	0	0	0	0	0	0	0	0	0	0	0	0	0	0	0	0	0	0	0	0	0	1	0	0	0	0	0	0	0	0	0	0	0	0	0	0	0	0	1	0	0	0	0	0
nonframeshift deletion	182del	0	0	0	0	0	0	0	0	0	0	0	0	0	0	0	0	0	0	0	0	0	0	0	0	0	0	0	0	0	0	0	0	0	0	0	0	0	0	0	0	0	0	0	0	0	0	0	0
stopgain	S183X	1	0	0	0	0	0	0	0	0	0	0	0	0	0	0	0	0	0	0	0	0	0	0	0	0	0	0	0	0	0	0	0	0	0	0	0	0	0	0	0	0	0	0	0	0	0	0	0
nonframeshift deletion	183del	0	0	0	0	0	0	0	0	0	0	0	0	0	0	0	0	0	0	0	0	0	0	0	0	0	0	0	0	0	0	0	0	0	0	0	0	0	0	0	0	0	0	0	0	0	0	0	0
stopgain	S183X	1	0	0	0	0	0	0	0	0	0	0	0	0	0	0	0	0	0	0	0	0	0	0	0	0	0	0	0	0	0	0	0	0	0	0	0	0	0	0	0	0	0	0	0	0	0	0	0
nonframeshift deletion	184del	0	0	0	0	0	0	0	0	0	0	0	0	0	0	0	0	0	0	0	0	0	0	0	0	0	0	0	0	0	0	0	0	0	0	0	0	0	0	0	0	0	0	0	0	0	0	0	0
synonymous SNV	S185S	0	0	0	1	0	0	0	0	0	0	0	0	0	0	0	0	0	0	0	0	0	0	0	0	0	0	0	0	0	0	0	0	0	0	0	0	0	0	0	0	0	0	0	0	0	0	0	0
nonsynonymous SNV	G187S	0	0	0	0	0	0	0	0	0	0	0	0	0	0	0	0	0	0	0	0	0	0	0	0	0	1	0	0	0	0	0	0	0	0	0	0	0	0	1	0	0	0	0	0	0	0	0	0
nonsynonymous SNV	G187R	0	0	0	0	0	0	0	0	0	0	0	0	0	0	0	0	0	0	0	0	0	0	0	0	0	1	0	0	0	0	0	0	0	0	0	0	0	0	1	0	0	0	0	0	0	0	0	0
synonymous SNV	A189A	0	0	0	1	0	0	0	0	0	0	0	0	0	0	0	0	0	0	0	0	0	0	0	0	0	0	0	0	0	0	0	0	0	0	0	0	0	0	0	0	0	0	0	0	0	0	0	0
nonsynonymous SNV	P190L	0	0	0	0	0	0	0	0	0	0	0	0	0	0	0	0	0	0	0	0	0	0	0	0	0	1	0	0	0	0	0	0	0	0	0	0	0	0	1	0	0	0	0	0	0	0	0	0
nonsynonymous SNV	P190R	0	0	0	0	0	0	0	0	0	0	0	0	0	0	0	0	0	0	0	0	0	0	0	0	0	1	0	0	0	0	0	0	0	0	0	0	0	0	1	0	0	0	0	0	0	0	0	0
nonsynonymous SNV	P191L	0	0	0	0	0	0	0	0	0	0	0	0	0	0	0	0	0	0	0	0	0	0	0	0	0	1	0	0	0	0	0	0	0	0	0	0	0	0	1	0	0	0	0	0	0	0	0	0
frameshift insertion	P191fs	0	0	0	0	0	1	0	0	0	0	0	0	0	0	0	0	0	0	0	0	0	0	0	0	0	0	0	0	0	0	0	0	0	0	0	0	0	0	0	0	0	0	0	0	0	0	0	0
frameshift deletion	P191fs	0	0	0	0	0	1	0	0	0	0	0	0	0	0	0	0	0	0	0	0	0	0	0	0	0	0	0	0	0	0	0	0	0	0	0	0	0	0	0	0	0	0	0	0	0	0	0	0
stopgain	Q192X	1	0	0	0	0	0	0	0	0	0	0	0	0	0	0	0	0	0	0	0	0	0	0	0	0	0	0	0	0	0	0	0	0	0	0	0	0	0	0	0	0	0	0	0	0	0	0	0
nonframeshift deletion	192del	0	0	0	0	0	0	0	0	0	0	0	0	0	0	0	0	0	0	0	0	0	0	0	0	0	0	0	0	0	0	0	0	0	0	0	0	0	0	0	0	0	0	0	0	0	0	0	0
stopgain	Q192X	1	0	0	0	0	0	0	0	0	0	0	0	0	0	0	0	0	0	0	0	0	0	0	0	0	0	0	0	0	0	0	0	0	0	0	0	0	0	0	0	0	0	0	0	0	0	0	0
nonframeshift deletion	192del	0	0	0	0	0	0	0	0	0	0	0	0	0	0	0	0	0	0	0	0	0	0	0	0	0	0	0	0	0	0	0	0	0	0	0	0	0	0	0	0	0	0	0	0	0	0	0	0
frameshift deletion	H193fs	0	0	0	0	0	1	0	0	0	0	0	0	0	0	0	0	0	0	0	0	0	0	0	0	0	0	0	0	0	0	0	0	0	0	0	0	0	0	0	0	0	0	0	0	0	0	0	0
nonsynonymous SNV	H193L	0	0	0	0	0	0	0	0	0	0	0	0	0	0	0	0	0	0	0	0	0	0	0	1	0	1	0	0	0	0	0	0	0	0	0	0	0	0	1	0	0	0	0	0	0	0	0	0
nonsynonymous SNV	H193R	0	0	0	0	0	0	0	0	0	0	0	0	0	0	0	0	0	0	0	0	0	0	0	1	0	1	0	0	0	0	0	0	0	0	0	0	0	0	1	0	0	0	0	0	0	0	0	0
nonsynonymous SNV	H193P	0	0	0	0	0	0	0	0	0	0	0	0	0	0	0	0	0	0	0	0	0	0	0	0	0	1	0	0	0	0	0	0	0	0	0	0	0	0	1	0	0	0	0	0	0	0	0	0
nonsynonymous SNV	H193Y	0	0	0	0	0	0	0	0	0	0	0	0	0	0	0	0	0	0	0	0	0	0	0	1	0	1	0	0	0	0	0	0	0	0	0	0	0	0	1	0	0	0	0	0	0	0	0	0
nonsynonymous SNV	H193D	0	0	0	0	0	0	0	0	0	0	0	0	0	0	0	0	0	0	0	0	0	0	0	0	0	1	0	0	0	0	0	0	0	0	0	0	0	0	1	0	0	0	0	0	0	0	0	0
nonsynonymous SNV	H193N	0	0	0	0	0	0	0	0	0	0	0	0	0	0	0	0	0	0	0	0	0	0	0	0	0	1	0	0	0	0	0	0	0	0	0	0	0	0	1	0	0	0	0	0	0	0	0	0
nonsynonymous SNV	H193L	0	0	0	0	0	0	0	0	0	0	0	0	0	0	0	0	0	0	0	0	0	0	0	1	0	1	0	0	0	0	0	0	0	0	0	0	0	0	1	0	0	0	0	0	0	0	0	0
nonsynonymous SNV	H193R	0	0	0	0	0	0	0	0	0	0	0	0	0	0	0	0	0	0	0	0	0	0	0	1	0	1	0	0	0	0	0	0	0	0	0	0	0	0	1	0	0	0	0	0	0	0	0	0
nonsynonymous SNV	H193Y	0	0	0	0	0	0	0	0	0	0	0	0	0	0	0	0	0	0	0	0	0	0	0	1	0	1	0	0	0	0	0	0	0	0	0	0	0	0	1	0	0	0	0	0	0	0	0	0
frameshift deletion	L194fs	0	0	0	0	0	1	0	0	0	0	0	0	0	0	0	0	0	0	0	0	0	0	0	0	0	0	0	0	0	0	0	0	0	0	0	0	0	0	0	0	0	0	0	0	0	0	0	0
nonsynonymous SNV	L194R	0	0	0	0	0	0	0	0	0	0	0	0	0	0	0	0	0	0	0	0	0	0	0	0	0	1	0	0	0	0	0	0	0	0	0	0	0	0	1	0	0	0	0	0	0	0	0	0
nonsynonymous SNV	L194P	0	0	0	0	0	0	0	0	0	0	0	0	0	0	0	0	0	0	0	0	0	0	0	0	0	1	0	0	0	0	0	0	0	0	0	0	0	0	1	0	0	0	0	0	0	0	0	0
nonsynonymous SNV	L194H	0	0	0	0	0	0	0	0	0	0	0	0	0	0	0	0	0	0	0	0	0	0	0	0	0	1	0	0	0	0	0	0	0	0	0	0	0	0	1	0	0	0	0	0	0	0	0	0
nonsynonymous SNV	L194F	0	0	0	0	0	0	0	0	0	0	0	0	0	0	0	0	0	0	0	0	0	0	0	0	0	1	0	0	0	0	0	0	0	0	0	0	0	0	1	0	0	0	0	0	0	0	0	0
nonsynonymous SNV	L194F	0	0	0	0	0	0	0	0	0	0	0	0	0	0	0	0	0	0	0	0	0	0	0	0	0	1	0	0	0	0	0	0	0	0	0	0	0	0	1	0	0	0	0	0	0	0	0	0
nonframeshift deletion	194del	0	0	0	0	0	0	0	0	0	0	0	0	0	0	0	0	0	0	0	0	0	0	0	0	0	0	0	0	0	0	0	0	0	0	0	0	0	0	0	0	0	0	0	0	0	0	0	0
nonsynonymous SNV	I195M	0	0	0	0	0	0	0	0	0	0	0	0	0	0	0	0	0	0	0	0	0	0	0	0	0	1	0	1	0	0	0	0	0	0	0	0	0	0	1	0	0	0	0	0	0	0	0	0
nonsynonymous SNV	I195S	0	0	0	0	0	0	0	0	0	0	0	0	0	0	0	0	0	0	0	0	0	0	0	0	0	1	0	1	0	0	0	0	0	0	0	0	0	0	1	0	0	0	0	0	0	0	0	0
nonsynonymous SNV	I195T	0	0	0	0	0	0	0	0	0	0	0	0	0	0	0	0	0	0	0	0	0	0	0	0	0	1	0	1	0	0	0	0	0	0	0	0	0	0	1	0	0	0	0	0	0	0	0	0
nonsynonymous SNV	I195N	0	0	0	0	0	0	0	0	0	0	0	0	0	0	0	0	0	0	0	0	0	0	0	0	0	1	0	1	0	0	0	0	0	0	0	0	0	0	1	0	0	0	0	0	0	0	0	0
nonsynonymous SNV	I195F	0	0	0	0	0	0	0	0	0	0	0	0	0	0	0	0	0	0	0	0	0	0	0	0	0	1	0	1	0	0	0	0	0	0	0	0	0	0	1	0	0	0	0	0	0	0	0	0
nonframeshift deletion	195del	0	0	0	0	0	0	0	0	0	0	0	0	0	0	0	0	0	0	0	0	0	0	0	0	0	0	0	0	0	0	0	0	0	0	0	0	0	0	0	0	0	0	0	0	0	0	0	0
nonsynonymous SNV	I195T	0	0	0	0	0	0	0	0	0	0	0	0	0	0	0	0	0	0	0	0	0	0	0	0	0	1	0	1	0	0	0	0	0	0	0	0	0	0	1	0	0	0	0	0	0	0	0	0
nonsynonymous SNV	R196P	0	0	0	0	0	0	0	0	0	0	0	0	0	0	0	0	0	0	0	0	0	0	0	1	0	0	0	1	0	0	0	0	0	0	0	0	0	0	0	0	0	0	0	0	0	0	0	0
stopgain	R196X	1	0	0	0	0	0	0	0	0	0	0	0	0	0	0	0	0	0	0	0	0	0	0	0	0	0	0	0	0	0	0	0	0	0	0	0	0	0	0	0	0	0	0	0	0	0	0	0
nonsynonymous SNV	R196P	0	0	0	0	0	0	0	0	0	0	0	0	0	0	0	0	0	0	0	0	0	0	0	1	0	0	0	1	0	0	0	0	0	0	0	0	0	0	0	0	0	0	0	0	0	0	0	0
stopgain	R196X	1	0	0	0	0	0	0	0	0	0	0	0	0	0	0	0	0	0	0	0	0	0	0	0	0	0	0	0	0	0	0	0	0	0	0	0	0	0	0	0	0	0	0	0	0	0	0	0
nonsynonymous SNV	V197G	0	0	0	0	0	0	0	0	0	0	0	0	0	0	0	0	0	0	0	0	0	0	0	0	0	0	0	0	0	0	0	0	0	0	0	0	0	0	0	0	0	0	0	0	0	0	0	0
stopgain	E198X	1	0	0	0	0	0	0	0	0	0	0	0	0	0	0	0	0	0	0	0	0	0	0	0	0	0	0	0	0	0	0	0	0	0	0	0	0	0	0	0	0	0	0	0	0	0	0	0
nonsynonymous SNV	G199V	0	0	0	0	0	0	0	0	0	0	0	0	0	0	0	0	0	0	0	0	0	0	0	0	0	0	0	0	0	0	0	0	0	0	0	0	0	0	0	0	0	0	0	0	0	0	0	0
frameshift insertion	L201fs	0	0	0	0	0	1	0	0	0	0	0	0	0	0	0	0	0	0	0	0	0	0	0	0	0	0	0	0	0	0	0	0	0	0	0	0	0	0	0	0	0	0	0	0	0	0	0	0
stopgain	L201X	1	0	0	0	0	0	0	0	0	0	0	0	0	0	0	0	0	0	0	0	0	0	0	0	0	0	0	0	0	0	0	0	0	0	0	0	0	0	0	0	0	0	0	0	0	0	0	0
frameshift deletion	V203fs	0	0	0	0	0	1	0	0	0	0	0	0	0	0	0	0	0	0	0	0	0	0	0	0	0	0	0	0	0	0	0	0	0	0	0	0	0	0	0	0	0	0	0	0	0	0	0	0
synonymous SNV	V203V	0	0	0	1	0	0	0	0	0	0	0	0	0	0	0	0	0	0	0	0	0	0	0	0	0	0	0	0	0	0	0	0	0	0	0	0	0	0	0	0	0	0	0	0	0	0	0	0
frameshift deletion	E204fs	0	0	0	0	0	1	0	0	0	0	0	0	0	0	0	0	0	0	0	0	0	0	0	0	0	0	0	0	0	0	0	0	0	0	0	0	0	0	0	0	0	0	0	0	0	0	0	0
stopgain	E204X	1	0	0	0	0	0	0	0	0	0	0	0	0	0	0	0	0	0	0	0	0	0	0	0	0	0	0	0	0	0	0	0	0	0	0	0	0	0	0	0	0	0	0	0	0	0	0	0
nonsynonymous SNV	E204Q	0	0	0	0	0	0	0	0	0	0	0	0	0	0	0	0	0	0	0	0	0	0	0	0	0	0	0	0	0	0	0	0	0	0	0	0	0	0	0	0	0	0	0	0	0	0	0	0
frameshift insertion	E204fs	0	0	0	0	0	1	0	0	0	0	0	0	0	0	0	0	0	0	0	0	0	0	0	0	0	0	0	0	0	0	0	0	0	0	0	0	0	0	0	0	0	0	0	0	0	0	0	0
stopgain	E204X	1	0	0	0	0	0	0	0	0	0	0	0	0	0	0	0	0	0	0	0	0	0	0	0	0	0	0	0	0	0	0	0	0	0	0	0	0	0	0	0	0	0	0	0	0	0	0	0
nonsynonymous SNV	Y205C	0	0	0	0	0	0	0	0	0	0	0	0	0	0	0	0	0	0	0	0	0	0	0	0	0	0	0	0	0	0	0	0	0	0	0	0	0	0	0	0	0	0	0	0	0	0	0	0
nonsynonymous SNV	Y205S	0	0	0	0	0	0	0	0	0	0	0	0	0	0	0	0	0	0	0	0	0	0	0	0	0	0	0	0	0	0	0	0	0	0	0	0	0	0	0	0	0	0	0	0	0	0	0	0
nonsynonymous SNV	Y205H	0	0	0	0	0	0	0	0	0	0	0	0	0	0	0	0	0	0	0	0	0	0	0	0	0	0	0	0	0	0	0	0	0	0	0	0	0	0	0	0	0	0	0	0	0	0	0	0
nonsynonymous SNV	Y205N	0	0	0	0	0	0	0	0	0	0	0	0	0	0	0	0	0	0	0	0	0	0	0	0	0	0	0	0	0	0	0	0	0	0	0	0	0	0	0	0	0	0	0	0	0	0	0	0
nonsynonymous SNV	Y205F	0	0	0	0	0	0	0	0	0	0	0	0	0	0	0	0	0	0	0	0	0	0	0	0	0	0	0	0	0	0	0	0	0	0	0	0	0	0	0	0	0	0	0	0	0	0	0	0
nonsynonymous SNV	Y205C	0	0	0	0	0	0	0	0	0	0	0	0	0	0	0	0	0	0	0	0	0	0	0	0	0	0	0	0	0	0	0	0	0	0	0	0	0	0	0	0	0	0	0	0	0	0	0	0
frameshift deletion	L206fs	0	0	0	0	0	1	0	0	0	0	0	0	0	0	0	0	0	0	0	0	0	0	0	0	0	0	0	0	0	0	0	0	0	0	0	0	0	0	0	0	0	0	0	0	0	0	0	0
frameshift deletion	D207fs	0	0	0	0	0	1	0	0	0	0	0	0	0	0	0	0	0	0	0	0	0	0	0	0	0	0	0	0	0	0	0	0	0	0	0	0	0	0	0	0	0	0	0	0	0	0	0	0
nonsynonymous SNV	D207N	0	0	0	0	0	0	0	0	0	0	0	0	0	0	0	0	0	0	0	0	0	0	0	0	0	0	0	0	0	0	0	0	0	0	0	0	0	0	0	0	0	0	0	0	0	0	0	0
nonsynonymous SNV	D208V	0	0	0	0	0	0	0	0	0	0	0	0	0	0	0	0	0	0	0	0	0	0	0	0	0	0	0	0	0	0	0	0	0	0	0	0	0	0	0	0	0	0	0	0	0	0	0	0
nonsynonymous SNV	D208G	0	0	0	0	0	0	0	0	0	0	0	0	0	0	0	0	0	0	0	0	0	0	0	0	0	0	0	0	0	0	0	0	0	0	0	0	0	0	0	0	0	0	0	0	0	0	0	0
frameshift deletion	R209fs	0	0	0	0	0	1	0	0	0	0	0	0	0	0	0	0	0	0	0	0	0	0	0	0	0	0	0	0	0	0	0	0	0	0	0	0	0	0	0	0	0	0	0	0	0	0	0	0
nonsynonymous SNV	R209I	0	0	0	0	0	0	0	0	0	0	0	0	0	0	0	0	0	0	0	0	0	0	0	0	0	0	0	0	0	0	0	0	0	0	0	0	0	0	0	0	0	0	0	0	0	0	0	0
frameshift deletion	R209fs	0	0	0	0	0	1	0	0	0	0	0	0	0	0	0	0	0	0	0	0	0	0	0	0	0	0	0	0	0	0	0	0	0	0	0	0	0	0	0	0	0	0	0	0	0	0	0	0
stopgain	R209X	1	0	0	0	0	0	0	0	0	0	0	0	0	0	0	0	0	0	0	0	0	0	0	0	0	0	0	0	0	0	0	0	0	0	0	0	0	0	0	0	0	0	0	0	0	0	0	0
frameshift deletion	N210fs	0	0	0	0	0	1	0	0	0	0	0	0	0	0	0	0	0	0	0	0	0	0	0	0	0	0	0	0	0	0	0	0	0	0	0	0	0	0	0	0	0	0	0	0	0	0	0	0
nonsynonymous SNV	T211I	0	0	0	0	0	0	0	0	0	0	0	0	0	0	0	0	0	0	0	0	0	0	0	0	0	0	0	0	0	0	0	0	0	0	0	0	0	0	0	0	0	0	0	0	0	0	0	0
frameshift deletion	T211fs	0	0	0	0	0	1	0	0	0	0	0	0	0	0	0	0	0	0	0	0	0	0	0	0	0	0	0	0	0	0	0	0	0	0	0	0	0	0	0	0	0	0	0	0	0	0	0	0
nonsynonymous SNV	T211I	0	0	0	0	0	0	0	0	0	0	0	0	0	0	0	0	0	0	0	0	0	0	0	0	0	0	0	0	0	0	0	0	0	0	0	0	0	0	0	0	0	0	0	0	0	0	0	0
frameshift deletion	F212fs	0	0	0	0	0	1	0	0	0	0	0	0	0	0	0	0	0	0	0	0	0	0	0	0	0	0	0	0	0	0	0	0	0	0	0	0	0	0	0	0	0	0	0	0	0	0	0	0
nonsynonymous SNV	R213L	0	0	0	0	0	0	0	0	0	0	0	0	0	0	0	1	0	0	0	0	0	0	0	1	0	0	0	1	0	0	0	0	0	0	0	0	0	0	0	0	0	0	0	0	0	1	0	0
nonsynonymous SNV	R213P	0	0	0	0	0	0	0	0	0	0	0	0	0	0	0	0	0	0	0	0	0	0	0	0	0	0	0	1	0	0	0	0	0	0	0	0	0	0	0	0	0	0	0	0	0	1	0	0
nonsynonymous SNV	R213Q	0	0	0	0	0	0	0	0	0	0	0	0	0	0	0	1	1	0	0	0	0	0	0	0	0	0	0	1	0	0	0	0	0	0	0	0	0	0	0	0	0	0	0	0	0	1	0	0
stopgain	R213X	1	0	0	0	0	0	0	0	0	0	0	0	0	0	0	0	0	0	0	0	0	0	0	0	0	0	0	0	0	0	0	0	0	0	0	0	0	0	0	0	0	0	0	0	0	0	0	0
nonsynonymous SNV	R213G	0	0	0	0	0	0	0	0	0	0	0	0	0	0	0	0	0	0	0	0	0	0	0	0	0	0	0	1	0	0	0	0	0	0	0	0	0	0	0	0	0	0	0	0	0	1	0	0
nonsynonymous SNV	R213Q	0	0	0	0	0	0	0	0	0	0	0	0	0	0	0	1	1	0	0	0	0	0	0	0	0	0	0	1	0	0	0	0	0	0	0	0	0	0	0	0	0	0	0	0	0	1	0	0
nonsynonymous SNV	R213L	0	0	0	0	0	0	0	0	0	0	0	0	0	0	0	1	0	0	0	0	0	0	0	1	0	0	0	1	0	0	0	0	0	0	0	0	0	0	0	0	0	0	0	0	0	1	0	0
stopgain	R213X	1	0	0	0	0	0	0	0	0	0	0	0	0	0	0	0	0	0	0	0	0	0	0	0	0	0	0	0	0	0	0	0	0	0	0	0	0	0	0	0	0	0	0	0	0	0	0	0
frameshift deletion	H214fs	0	0	0	0	0	1	0	0	0	0	0	0	0	0	0	0	0	0	0	0	0	0	0	0	0	0	0	0	0	0	0	0	0	0	0	0	0	0	0	0	0	0	0	0	0	0	0	0
nonsynonymous SNV	H214L	0	0	0	0	0	0	0	0	0	0	0	0	0	0	0	0	0	0	0	0	0	0	0	0	0	0	0	0	0	0	0	0	0	0	0	0	0	0	0	0	0	0	0	0	0	1	0	0
nonsynonymous SNV	H214R	0	0	0	0	0	0	0	0	0	0	0	0	0	0	0	0	0	0	0	0	0	0	0	0	0	0	0	0	0	0	0	0	0	0	0	0	0	0	0	0	0	0	0	0	0	1	0	0
nonsynonymous SNV	H214R	0	0	0	0	0	0	0	0	0	0	0	0	0	0	0	0	0	0	0	0	0	0	0	0	0	0	0	0	0	0	0	0	0	0	0	0	0	0	0	0	0	0	0	0	0	1	0	0
nonsynonymous SNV	S215R	0	0	0	0	0	0	0	0	0	0	0	0	0	0	0	0	0	0	0	0	0	0	0	1	0	0	0	1	0	0	0	0	0	0	0	0	0	0	0	0	0	0	0	0	0	1	0	0
nonsynonymous SNV	S215I	0	0	0	0	0	0	0	0	0	0	0	0	0	0	0	0	0	0	0	0	0	0	0	1	0	0	0	1	0	0	0	0	0	0	0	0	0	0	0	0	0	0	0	0	0	1	0	0
nonsynonymous SNV	S215N	0	0	0	0	0	0	0	0	0	0	0	0	0	0	0	0	0	0	0	0	0	0	0	0	0	0	0	1	0	0	0	0	0	0	0	0	0	0	0	0	0	0	0	0	0	1	0	0
nonsynonymous SNV	S215G	0	0	0	0	0	0	0	0	0	0	0	0	0	0	0	0	0	0	0	0	0	0	0	0	0	0	0	1	0	0	0	0	0	0	0	0	0	0	0	0	0	0	0	0	0	1	0	0
nonframeshift deletion	215del	0	0	0	0	0	0	0	0	0	0	0	0	0	0	0	0	0	0	0	0	0	0	0	0	0	0	0	0	0	0	0	0	0	0	0	0	0	0	0	0	0	0	0	0	0	0	0	0
nonsynonymous SNV	S215N	0	0	0	0	0	0	0	0	0	0	0	0	0	0	0	0	0	0	0	0	0	0	0	0	0	0	0	1	0	0	0	0	0	0	0	0	0	0	0	0	0	0	0	0	0	1	0	0
nonsynonymous SNV	S215I	0	0	0	0	0	0	0	0	0	0	0	0	0	0	0	0	0	0	0	0	0	0	0	1	0	0	0	1	0	0	0	0	0	0	0	0	0	0	0	0	0	0	0	0	0	1	0	0
nonsynonymous SNV	S215C	0	0	0	0	0	0	0	0	0	0	0	0	0	0	0	0	0	0	0	0	0	0	0	0	0	0	0	1	0	0	0	0	0	0	0	0	0	0	0	0	0	0	0	0	0	1	0	0
nonsynonymous SNV	S215R	0	0	0	0	0	0	0	0	0	0	0	0	0	0	0	0	0	0	0	0	0	0	0	1	0	0	0	1	0	0	0	0	0	0	0	0	0	0	0	0	0	0	0	0	0	1	0	0
nonsynonymous SNV	V216G	0	0	0	0	0	0	0	0	0	0	0	0	0	0	0	0	0	0	0	0	0	0	0	0	0	0	0	1	0	0	0	0	0	0	0	0	0	0	0	0	0	0	0	0	0	1	0	0
nonsynonymous SNV	V216E	0	0	0	0	0	0	0	0	0	0	0	0	0	0	0	0	0	0	0	0	0	0	0	0	0	0	0	1	0	0	0	0	0	0	0	0	0	0	0	0	0	0	0	0	0	1	0	0
nonsynonymous SNV	V216L	0	0	0	0	0	0	0	0	0	0	0	0	0	0	0	0	0	0	0	0	0	0	0	0	0	0	0	1	0	0	0	0	0	0	0	0	0	0	0	0	0	0	0	0	0	1	0	0
nonsynonymous SNV	V216M	0	0	0	0	0	0	0	0	0	0	0	0	0	0	0	0	0	0	0	0	0	0	0	0	0	0	0	1	0	0	0	0	0	0	0	0	0	0	0	0	0	0	0	0	0	1	0	0
nonsynonymous SNV	V216M	0	0	0	0	0	0	0	0	0	0	0	0	0	0	0	0	0	0	0	0	0	0	0	0	0	0	0	1	0	0	0	0	0	0	0	0	0	0	0	0	0	0	0	0	0	1	0	0
nonframeshift deletion	218del	0	0	0	0	0	0	0	0	0	0	0	0	0	0	0	0	0	0	0	0	0	0	0	0	0	0	0	0	0	0	0	0	0	0	0	0	0	0	0	0	0	0	0	0	0	0	0	0
nonsynonymous SNV	V218G	0	0	0	0	0	0	0	0	0	0	0	0	0	0	0	0	0	0	0	0	0	0	0	0	0	0	0	0	0	0	0	0	0	0	0	0	0	0	0	0	0	0	0	0	0	1	0	0
nonframeshift deletion	218del	0	0	0	0	0	0	0	0	0	0	0	0	0	0	0	0	0	0	0	0	0	0	0	0	0	0	0	0	0	0	0	0	0	0	0	0	0	0	0	0	0	0	0	0	0	0	0	0
nonsynonymous SNV	V218L	0	0	0	0	0	0	0	0	0	0	0	0	0	0	0	0	0	0	0	0	0	0	0	0	0	0	0	0	0	0	0	0	0	0	0	0	0	0	0	0	0	0	0	0	0	1	0	0
frameshift deletion	P219fs	0	0	0	0	0	1	0	0	0	0	0	0	0	0	0	0	0	0	0	0	0	0	0	0	0	0	0	0	0	0	0	0	0	0	0	0	0	0	0	0	0	0	0	0	0	0	0	0
nonsynonymous SNV	Y220C	0	0	0	0	0	0	0	0	0	0	0	0	0	0	0	1	1	0	0	0	0	0	0	0	0	0	0	1	0	0	0	0	0	0	0	0	0	0	0	0	0	0	0	0	0	0	0	0
nonsynonymous SNV	Y220S	0	0	0	0	0	0	0	0	0	0	0	0	0	0	0	0	0	0	0	0	0	0	0	0	0	0	0	1	0	0	0	0	0	0	0	0	0	0	0	0	0	0	0	0	0	0	0	0
nonsynonymous SNV	Y220H	0	0	0	0	0	0	0	0	0	0	0	0	0	0	0	0	0	0	0	0	0	0	0	0	0	0	0	1	0	0	0	0	0	0	0	0	0	0	0	0	0	0	0	0	0	0	0	0
nonsynonymous SNV	Y220C	0	0	0	0	0	0	0	0	0	0	0	0	0	0	0	1	1	0	0	0	0	0	0	0	0	0	0	1	0	0	0	0	0	0	0	0	0	0	0	0	0	0	0	0	0	0	0	0
nonsynonymous SNV	Y220D	0	0	0	0	0	0	0	0	0	0	0	0	0	0	0	1	0	0	0	0	0	0	0	1	0	0	0	1	0	0	0	0	0	0	0	0	0	0	0	0	0	0	0	0	0	0	0	0
frameshift deletion	E221fs	0	0	0	0	0	1	0	0	0	0	0	0	0	0	0	0	0	0	0	0	0	0	0	0	0	0	0	0	0	0	0	0	0	0	0	0	0	0	0	0	0	0	0	0	0	0	0	0
stopgain	E221X	1	0	0	0	0	0	0	0	0	0	0	0	0	0	0	0	0	0	0	0	0	0	0	0	0	0	0	0	0	0	0	0	0	0	0	0	0	0	0	0	0	0	0	0	0	0	0	0
frameshift deletion	P222fs	0	0	0	0	0	1	0	0	0	0	0	0	0	0	0	0	0	0	0	0	0	0	0	0	0	0	0	0	0	0	0	0	0	0	0	0	0	0	0	0	0	0	0	0	0	0	0	0
frameshift deletion	P223fs	0	0	0	0	0	1	0	0	0	0	0	0	0	0	0	0	0	0	0	0	0	0	0	0	0	0	0	0	0	0	0	0	0	0	0	0	0	0	0	0	0	0	0	0	0	0	0	0
nonsynonymous SNV	P223L	0	0	0	0	0	0	0	0	0	0	0	0	0	0	0	0	0	0	0	0	0	0	0	1	0	0	0	1	0	0	0	0	0	0	0	0	0	0	0	0	0	0	0	0	0	0	0	0
nonsynonymous SNV	E224D	0	0	0	0	0	0	0	0	0	0	0	0	0	0	0	0	0	0	0	0	0	0	0	0	0	0	0	1	0	0	0	0	0	0	0	0	0	0	0	0	0	0	0	0	0	0	0	0
synonymous SNV	E224E	0	0	0	1	0	0	0	0	0	0	0	0	0	0	0	0	0	0	0	0	0	0	0	0	0	0	0	1	0	0	0	0	0	0	0	0	0	0	0	0	0	0	0	0	0	0	0	0
nonsynonymous SNV	E224D	0	0	0	0	0	0	0	0	0	0	0	0	0	0	0	0	0	0	0	0	0	0	0	0	0	0	0	1	0	0	0	0	0	0	0	0	0	0	0	0	0	0	0	0	0	0	0	0
synonymous SNV	E224E	0	0	0	1	0	0	0	0	0	0	0	0	0	0	0	0	0	0	0	0	0	0	0	0	0	0	0	1	0	0	0	0	0	0	0	0	0	0	0	0	0	0	0	0	0	0	0	0
stopgain	E224X	1	0	0	0	0	0	0	0	0	0	0	0	0	0	0	0	0	0	0	0	0	0	0	0	0	0	0	0	0	0	0	0	0	0	0	0	0	0	0	0	0	0	0	0	0	0	0	0
nonsynonymous SNV	E224K	0	0	0	0	0	0	0	0	0	0	0	0	0	0	0	0	0	0	0	0	0	0	0	0	0	0	0	1	0	0	0	0	0	0	0	0	0	0	0	0	0	0	0	0	0	0	0	0
frameshift deletion	V225fs	0	0	0	0	0	1	0	0	0	0	0	0	0	0	0	0	0	0	0	0	0	0	0	0	0	0	0	0	0	0	0	0	0	0	0	0	0	0	0	0	0	0	0	0	0	0	0	0
frameshift deletion	S227fs	0	0	0	0	0	1	0	0	0	0	0	0	0	0	0	0	0	0	0	0	0	0	0	0	0	0	0	0	0	0	0	0	0	0	0	0	0	0	0	0	0	0	0	0	0	0	0	0
stopgain	C229X	1	0	0	0	0	0	0	0	0	0	0	0	0	0	0	0	0	0	0	0	0	0	0	0	0	0	0	0	0	0	0	0	0	0	0	0	0	0	0	0	0	0	0	0	0	0	0	0
frameshift deletion	C229fs	0	0	0	0	0	1	0	0	0	0	0	0	0	0	0	0	0	0	0	0	0	0	0	0	0	0	0	0	0	0	0	0	0	0	0	0	0	0	0	0	0	0	0	0	0	0	0	0
frameshift deletion	C229fs	0	0	0	0	0	1	0	0	0	0	0	0	0	0	0	0	0	0	0	0	0	0	0	0	0	0	0	0	0	0	0	0	0	0	0	0	0	0	0	0	0	0	0	0	0	0	0	0
nonsynonymous SNV	T230P	0	0	0	0	0	0	0	0	0	0	0	0	0	0	0	0	0	0	0	0	0	0	0	0	0	0	0	0	0	0	0	0	0	0	0	0	0	0	0	0	0	0	0	0	0	0	0	0
synonymous SNV	T231T	0	0	0	1	0	0	0	0	0	0	0	0	0	0	0	0	0	0	0	0	0	0	0	0	0	0	0	0	0	0	0	0	0	0	0	0	0	0	0	0	0	0	0	0	0	0	0	0
nonsynonymous SNV	I232S	0	0	0	0	0	0	0	0	0	0	0	0	0	0	0	0	0	0	0	0	0	0	0	0	0	0	0	0	0	0	0	0	0	0	0	0	0	0	0	0	0	0	0	0	0	0	0	0
nonsynonymous SNV	I232T	0	0	0	0	0	0	0	0	0	0	0	0	0	0	0	0	0	0	0	0	0	0	0	0	0	0	0	0	0	0	0	0	0	0	0	0	0	0	0	0	0	0	0	0	0	0	0	0
nonsynonymous SNV	I232N	0	0	0	0	0	0	0	0	0	0	0	0	0	0	0	0	0	0	0	0	0	0	0	0	0	0	0	0	0	0	0	0	0	0	0	0	0	0	0	0	0	0	0	0	0	0	0	0
frameshift deletion	I232fs	0	0	0	0	0	1	0	0	0	0	0	0	0	0	0	0	0	0	0	0	0	0	0	0	0	0	0	0	0	0	0	0	0	0	0	0	0	0	0	0	0	0	0	0	0	0	0	0
nonsynonymous SNV	I232N	0	0	0	0	0	0	0	0	0	0	0	0	0	0	0	0	0	0	0	0	0	0	0	0	0	0	0	0	0	0	0	0	0	0	0	0	0	0	0	0	0	0	0	0	0	0	0	0
frameshift deletion	H233fs	0	0	0	0	0	1	0	0	0	0	0	0	0	0	0	0	0	0	0	0	0	0	0	0	0	0	0	0	0	0	0	0	0	0	0	0	0	0	0	0	0	0	0	0	0	0	0	0
nonframeshift deletion	233del	0	0	0	0	0	0	0	0	0	0	0	0	0	0	0	0	0	0	0	0	0	0	0	0	0	0	0	0	0	0	0	0	0	0	0	0	0	0	0	0	0	0	0	0	0	0	0	0
nonsynonymous SNV	Y234C	0	0	0	0	0	0	0	0	0	0	0	0	0	0	0	0	0	0	0	0	0	0	0	0	0	0	0	1	0	0	0	0	0	0	0	0	0	0	0	0	0	0	0	0	0	0	0	0
nonsynonymous SNV	Y234S	0	0	0	0	0	0	0	0	0	0	0	0	0	0	0	0	0	0	0	0	0	0	0	0	0	0	0	1	0	0	0	0	0	0	0	0	0	0	0	0	0	0	0	0	0	0	0	0
nonsynonymous SNV	Y234H	0	0	0	0	0	0	0	0	0	0	0	0	0	0	0	0	0	0	0	0	0	0	0	0	0	0	0	1	0	0	0	0	0	0	0	0	0	0	0	0	0	0	0	0	0	0	0	0
nonframeshift deletion	234del	0	0	0	0	0	0	0	0	0	0	0	0	0	0	0	0	0	0	0	0	0	0	0	0	0	0	0	0	0	0	0	0	0	0	0	0	0	0	0	0	0	0	0	0	0	0	0	0
nonsynonymous SNV	Y234C	0	0	0	0	0	0	0	0	0	0	0	0	0	0	0	0	0	0	0	0	0	0	0	0	0	0	0	1	0	0	0	0	0	0	0	0	0	0	0	0	0	0	0	0	0	0	0	0
nonsynonymous SNV	Y234H	0	0	0	0	0	0	0	0	0	0	0	0	0	0	0	0	0	0	0	0	0	0	0	0	0	0	0	1	0	0	0	0	0	0	0	0	0	0	0	0	0	0	0	0	0	0	0	0
nonsynonymous SNV	Y234N	0	0	0	0	0	0	0	0	0	0	0	0	0	0	0	0	0	0	0	0	0	0	0	0	0	0	0	1	0	0	0	0	0	0	0	0	0	0	0	0	0	0	0	0	0	0	0	0
stopgain	Y236X	1	0	0	0	0	0	0	0	0	0	0	0	0	0	0	0	0	0	0	0	0	0	0	0	0	0	0	0	0	0	0	0	0	0	0	0	0	0	0	0	0	0	0	0	0	0	0	0
nonsynonymous SNV	Y236C	0	0	0	0	0	0	0	0	0	0	0	0	0	0	0	1	1	0	0	0	0	0	0	0	0	1	0	1	0	0	0	1	0	0	0	0	0	0	0	0	0	0	0	0	0	0	0	0
nonsynonymous SNV	Y236D	0	0	0	0	0	0	0	0	0	0	0	0	0	0	0	0	0	0	0	0	0	0	0	0	0	1	0	1	0	0	0	1	0	0	0	0	0	0	0	0	0	0	0	0	0	0	0	0
nonsynonymous SNV	Y236C	0	0	0	0	0	0	0	0	0	0	0	0	0	0	0	1	1	0	0	0	0	0	0	0	0	1	0	1	0	0	0	1	0	0	0	0	0	0	0	0	0	0	0	0	0	0	0	0
nonsynonymous SNV	M237I	0	0	0	0	0	0	0	0	0	0	0	0	0	0	0	1	1	0	0	0	0	0	0	0	0	1	0	0	0	0	0	1	0	0	0	0	0	0	0	0	0	0	0	0	0	0	0	0
nonsynonymous SNV	M237K	0	0	0	0	0	0	0	0	0	0	0	0	0	0	0	0	0	0	0	0	0	0	0	0	0	1	0	0	0	0	0	1	0	0	0	0	0	0	0	0	0	0	0	0	0	0	0	0
nonsynonymous SNV	M237V	0	0	0	0	0	0	0	0	0	0	0	0	0	0	0	0	0	0	0	0	0	0	0	0	0	1	0	0	0	0	0	1	0	0	0	0	0	0	0	0	0	0	0	0	0	0	0	0
nonsynonymous SNV	M237I	0	0	0	0	0	0	0	0	0	0	0	0	0	0	0	1	1	0	0	0	0	0	0	0	0	1	0	0	0	0	0	1	0	0	0	0	0	0	0	0	0	0	0	0	0	0	0	0
nonsynonymous SNV	M237K	0	0	0	0	0	0	0	0	0	0	0	0	0	0	0	0	0	0	0	0	0	0	0	0	0	1	0	0	0	0	0	1	0	0	0	0	0	0	0	0	0	0	0	0	0	0	0	0
nonsynonymous SNV	C238F	0	0	0	0	0	0	0	0	0	0	0	0	0	0	0	0	0	0	0	0	0	0	0	0	0	1	0	0	0	0	0	1	0	0	0	0	0	0	0	0	0	0	0	0	0	0	0	0
nonsynonymous SNV	C238Y	0	0	0	0	0	0	0	0	0	0	0	0	0	0	0	0	0	0	0	0	0	0	0	1	0	1	0	0	0	0	0	1	0	0	0	0	0	0	0	0	0	0	0	0	0	0	0	0
nonsynonymous SNV	C238R	0	0	0	0	0	0	0	0	0	0	0	0	0	0	0	0	0	0	0	0	0	0	0	0	0	1	0	0	0	0	0	1	0	0	0	0	0	0	0	0	0	0	0	0	0	0	0	0
nonsynonymous SNV	C238S	0	0	0	0	0	0	0	0	0	0	0	0	0	0	0	0	0	0	0	0	0	0	0	1	0	1	0	0	0	0	0	1	0	0	0	0	0	0	0	0	0	0	0	0	0	0	0	0
frameshift deletion	C238fs	0	0	0	0	0	1	0	0	0	0	0	0	0	0	0	0	0	0	0	0	0	0	0	0	0	0	0	0	0	0	0	0	0	0	0	0	0	0	0	0	0	0	0	0	0	0	0	0
nonframeshift insertion	C238delinsCN	0	0	0	0	0	0	0	0	0	0	0	0	0	0	0	0	0	0	0	0	0	0	0	0	0	0	0	0	0	0	0	0	0	0	0	0	0	0	0	0	0	0	0	0	0	0	0	0
nonsynonymous SNV	C238S	0	0	0	0	0	0	0	0	0	0	0	0	0	0	0	0	0	0	0	0	0	0	0	1	0	1	0	0	0	0	0	1	0	0	0	0	0	0	0	0	0	0	0	0	0	0	0	0
nonsynonymous SNV	C238Y	0	0	0	0	0	0	0	0	0	0	0	0	0	0	0	0	0	0	0	0	0	0	0	1	0	1	0	0	0	0	0	1	0	0	0	0	0	0	0	0	0	0	0	0	0	0	0	0
synonymous SNV	C238C	0	0	0	1	0	0	0	0	0	0	0	0	0	0	0	0	0	0	0	0	0	0	0	0	0	0	0	0	0	0	0	0	0	0	0	0	0	0	0	0	0	0	0	0	0	0	0	0
frameshift deletion	N239fs	0	0	0	0	0	1	0	0	0	0	0	0	0	0	0	0	0	0	0	0	0	0	0	0	0	0	0	0	0	0	0	0	0	0	0	0	0	0	0	0	0	0	0	0	0	0	0	0
nonsynonymous SNV	N239S	0	0	0	0	0	0	0	0	0	0	0	0	0	0	0	0	0	0	0	0	0	0	0	0	0	1	0	0	0	0	0	1	0	0	0	0	0	0	0	0	0	0	0	0	0	0	0	0
nonsynonymous SNV	N239D	0	0	0	0	0	0	0	0	0	0	0	0	0	0	0	0	0	0	0	0	0	0	0	0	0	1	0	0	0	0	0	1	0	0	0	0	0	0	0	0	0	0	0	0	0	0	0	0
frameshift insertion	N239fs	0	0	0	0	0	1	0	0	0	0	0	0	0	0	0	0	0	0	0	0	0	0	0	0	0	0	0	0	0	0	0	0	0	0	0	0	0	0	0	0	0	0	0	0	0	0	0	0
nonsynonymous SNV	N239D	0	0	0	0	0	0	0	0	0	0	0	0	0	0	0	0	0	0	0	0	0	0	0	0	0	1	0	0	0	0	0	1	0	0	0	0	0	0	0	0	0	0	0	0	0	0	0	0
nonsynonymous SNV	S240G	0	0	0	0	0	0	0	0	0	0	0	0	0	0	0	0	0	0	0	0	0	0	0	0	0	1	0	0	0	0	0	1	0	0	0	0	0	0	0	0	0	0	0	0	0	0	0	0
nonframeshift deletion	240del	0	0	0	0	0	0	0	0	0	0	0	0	0	0	0	0	0	0	0	0	0	0	0	0	0	0	0	0	0	0	0	0	0	0	0	0	0	0	0	0	0	0	0	0	0	0	0	0
stopgain	S240X	1	0	0	0	0	0	0	0	0	0	0	0	0	0	0	0	0	0	0	0	0	0	0	0	0	0	0	0	0	0	0	0	0	0	0	0	0	0	0	0	0	0	0	0	0	0	0	0
nonsynonymous SNV	S240R	0	0	0	0	0	0	0	0	0	0	0	0	0	0	0	0	0	0	0	0	0	0	0	1	0	1	0	0	0	0	0	1	0	0	0	0	0	0	0	0	0	0	0	0	0	0	0	0
frameshift deletion	S241fs	0	0	0	0	0	1	0	0	0	0	0	0	0	0	0	0	0	0	0	0	0	0	0	0	0	0	0	0	0	0	0	0	0	0	0	0	0	0	0	0	0	0	0	0	0	0	0	0
nonframeshift deletion	241del	0	0	0	0	0	0	0	0	0	0	0	0	0	0	0	0	0	0	0	0	0	0	0	0	0	0	0	0	0	0	0	0	0	0	0	0	0	0	0	0	0	0	0	0	0	0	0	0
nonsynonymous SNV	S241F	0	0	0	0	0	0	0	0	0	0	0	0	0	0	0	1	0	0	0	0	0	0	0	1	0	1	0	0	0	0	0	1	0	0	0	0	0	0	0	0	0	0	0	0	0	0	0	0
nonsynonymous SNV	S241C	0	0	0	0	0	0	0	0	0	0	0	0	0	0	0	1	0	0	0	0	0	0	0	1	0	1	0	0	0	0	0	1	0	0	0	0	0	0	0	0	0	0	0	0	0	0	0	0
nonsynonymous SNV	S241Y	0	0	0	0	0	0	0	0	0	0	0	0	0	0	0	1	0	0	0	0	0	0	0	1	0	1	0	0	0	0	0	1	0	0	0	0	0	0	0	0	0	0	0	0	0	0	0	0
nonsynonymous SNV	S241P	0	0	0	0	0	0	0	0	0	0	0	0	0	0	0	0	0	0	0	0	0	0	0	0	0	1	0	0	0	0	0	1	0	0	0	0	0	0	0	0	0	0	0	0	0	0	0	0
frameshift deletion	S241fs	0	0	0	0	0	1	0	0	0	0	0	0	0	0	0	0	0	0	0	0	0	0	0	0	0	0	0	0	0	0	0	0	0	0	0	0	0	0	0	0	0	0	0	0	0	0	0	0
synonymous SNV	S241S	0	0	0	1	0	0	0	0	0	0	0	0	0	0	0	0	0	0	0	0	0	0	0	0	0	1	0	0	0	0	0	0	0	0	0	0	0	0	0	0	0	0	0	0	0	0	0	0
nonsynonymous SNV	S241F	0	0	0	0	0	0	0	0	0	0	0	0	0	0	0	1	0	0	0	0	0	0	0	1	0	1	0	0	0	0	0	1	0	0	0	0	0	0	0	0	0	0	0	0	0	0	0	0
nonsynonymous SNV	S241Y	0	0	0	0	0	0	0	0	0	0	0	0	0	0	0	1	0	0	0	0	0	0	0	1	0	1	0	0	0	0	0	1	0	0	0	0	0	0	0	0	0	0	0	0	0	0	0	0
nonsynonymous SNV	S241A	0	0	0	0	0	0	0	0	0	0	0	0	0	0	0	1	0	0	0	0	0	0	0	1	0	1	0	0	0	0	0	1	0	0	0	0	0	0	0	0	0	0	0	0	0	0	0	0
nonsynonymous SNV	C242F	0	0	0	0	0	0	0	0	0	0	0	0	0	0	0	0	0	0	0	0	0	0	0	1	0	1	0	0	0	0	0	1	0	0	0	0	0	0	0	0	0	0	0	0	0	0	0	0
nonsynonymous SNV	C242S	0	0	0	0	0	0	0	0	0	0	0	0	0	0	0	0	0	0	0	0	0	0	0	1	0	1	0	0	0	0	0	1	0	0	0	0	0	0	0	0	0	0	0	0	0	0	0	0
nonsynonymous SNV	C242Y	0	0	0	0	0	0	0	0	0	0	0	0	0	0	0	0	0	0	0	0	0	0	0	1	0	1	0	0	0	0	0	1	0	0	0	0	0	0	0	0	0	0	0	0	0	0	0	0
nonsynonymous SNV	C242G	0	0	0	0	0	0	0	0	0	0	0	0	0	0	0	0	0	0	0	0	0	0	0	0	0	1	0	0	0	0	0	1	0	0	0	0	0	0	0	0	0	0	0	0	0	0	0	0
nonsynonymous SNV	C242W	0	0	0	0	0	0	0	0	0	0	0	0	0	0	0	0	0	0	0	0	0	0	0	1	0	1	0	0	0	0	0	1	0	0	0	0	0	0	0	0	0	0	0	0	0	0	0	0
nonsynonymous SNV	C242F	0	0	0	0	0	0	0	0	0	0	0	0	0	0	0	0	0	0	0	0	0	0	0	1	0	1	0	0	0	0	0	1	0	0	0	0	0	0	0	0	0	0	0	0	0	0	0	0
nonsynonymous SNV	C242Y	0	0	0	0	0	0	0	0	0	0	0	0	0	0	0	0	0	0	0	0	0	0	0	1	0	1	0	0	0	0	0	1	0	0	0	0	0	0	0	0	0	0	0	0	0	0	0	0
nonsynonymous SNV	C242S	0	0	0	0	0	0	0	0	0	0	0	0	0	0	0	0	0	0	0	0	0	0	0	1	0	1	0	0	0	0	0	1	0	0	0	0	0	0	0	0	0	0	0	0	0	0	0	0
nonsynonymous SNV	C242R	0	0	0	0	0	0	0	0	0	0	0	0	0	0	0	0	0	0	0	0	0	0	0	1	0	1	0	0	0	0	0	1	0	0	0	0	0	0	0	0	0	0	0	0	0	0	0	0
nonsynonymous SNV	M243I	0	0	0	0	0	0	0	0	0	0	0	0	0	0	0	0	0	0	0	0	0	0	0	0	0	1	0	0	0	0	0	1	0	0	0	0	0	0	0	0	0	0	0	0	0	0	0	0
nonframeshift deletion	243del	0	0	0	0	0	0	0	0	0	0	0	0	0	0	0	0	0	0	0	0	0	0	0	0	0	0	0	0	0	0	0	0	0	0	0	0	0	0	0	0	0	0	0	0	0	0	0	0
frameshift deletion	G244fs	0	0	0	0	0	1	0	0	0	0	0	0	0	0	0	0	0	0	0	0	0	0	0	0	0	0	0	0	0	0	0	0	0	0	0	0	0	0	0	0	0	0	0	0	0	0	0	0
nonsynonymous SNV	G244D	0	0	0	0	0	0	0	0	0	0	0	0	0	0	0	0	0	0	0	0	0	0	0	1	0	1	0	0	0	0	0	1	0	0	0	0	0	0	0	0	0	0	0	0	0	0	0	0
nonsynonymous SNV	G244C	0	0	0	0	0	0	0	0	0	0	0	0	0	0	0	0	0	0	0	0	0	0	0	1	0	1	0	0	0	0	0	1	0	0	0	0	0	0	0	0	0	0	0	0	0	0	0	0
nonsynonymous SNV	G244R	0	0	0	0	0	0	0	0	0	0	0	0	0	0	0	0	0	0	0	0	0	0	0	0	0	1	0	0	0	0	0	1	0	0	0	0	0	0	0	0	0	0	0	0	0	0	0	0
nonsynonymous SNV	G244S	0	0	0	0	0	0	0	0	0	0	0	0	0	0	0	0	1	0	0	0	0	0	0	0	0	1	0	0	0	0	0	1	0	0	0	0	0	0	0	0	0	0	0	0	0	0	0	0
nonsynonymous SNV	G244D	0	0	0	0	0	0	0	0	0	0	0	0	0	0	0	0	0	0	0	0	0	0	0	1	0	1	0	0	0	0	0	1	0	0	0	0	0	0	0	0	0	0	0	0	0	0	0	0
nonsynonymous SNV	G244A	0	0	0	0	0	0	0	0	0	0	0	0	0	0	0	0	0	0	0	0	0	0	0	0	0	1	0	0	0	0	0	1	0	0	0	0	0	0	0	0	0	0	0	0	0	0	0	0
nonsynonymous SNV	G244C	0	0	0	0	0	0	0	0	0	0	0	0	0	0	0	0	0	0	0	0	0	0	0	1	0	1	0	0	0	0	0	1	0	0	0	0	0	0	0	0	0	0	0	0	0	0	0	0
nonsynonymous SNV	G244S	0	0	0	0	0	0	0	0	0	0	0	0	0	0	0	0	1	0	0	0	0	0	0	0	0	1	0	0	0	0	0	1	0	0	0	0	0	0	0	0	0	0	0	0	0	0	0	0
nonsynonymous SNV	G245V	0	0	0	0	0	0	0	0	0	0	0	0	0	0	0	1	0	0	0	0	0	0	0	1	0	1	0	0	0	0	0	1	0	0	0	0	0	0	0	0	0	0	0	0	0	0	0	0
nonsynonymous SNV	G245D	0	0	0	0	0	0	0	0	0	0	0	0	0	0	0	1	0	0	0	0	0	0	0	1	0	1	0	0	0	0	0	1	0	0	0	0	0	0	0	0	0	0	0	0	0	0	0	0
nonsynonymous SNV	G245C	0	0	0	0	0	0	0	0	0	0	0	0	0	0	0	1	0	0	0	0	0	0	0	1	0	1	0	0	0	0	0	1	0	0	0	0	0	0	0	0	0	0	0	0	0	0	0	0
nonsynonymous SNV	G245R	0	0	0	0	0	0	0	0	0	0	0	0	0	0	0	0	0	0	0	0	0	0	0	0	0	1	0	0	0	0	0	1	0	0	0	0	0	0	0	0	0	0	0	0	0	0	0	0
nonsynonymous SNV	G245S	0	0	0	0	0	0	0	0	0	0	0	0	0	0	0	1	0	0	0	0	0	0	0	1	0	1	0	0	0	0	0	1	0	0	0	0	0	0	0	0	0	0	0	0	0	0	0	0
nonsynonymous SNV	G245V	0	0	0	0	0	0	0	0	0	0	0	0	0	0	0	1	0	0	0	0	0	0	0	1	0	1	0	0	0	0	0	1	0	0	0	0	0	0	0	0	0	0	0	0	0	0	0	0
nonsynonymous SNV	G245D	0	0	0	0	0	0	0	0	0	0	0	0	0	0	0	1	0	0	0	0	0	0	0	1	0	1	0	0	0	0	0	1	0	0	0	0	0	0	0	0	0	0	0	0	0	0	0	0
nonsynonymous SNV	G245S	0	0	0	0	0	0	0	0	0	0	0	0	0	0	0	1	0	0	0	0	0	0	0	1	0	1	0	0	0	0	0	1	0	0	0	0	0	0	0	0	0	0	0	0	0	0	0	0
nonsynonymous SNV	M246I	0	0	0	0	0	0	0	0	0	0	0	0	0	0	0	0	0	0	0	0	0	0	0	0	0	1	0	0	0	0	0	1	0	0	0	0	0	0	0	0	0	0	0	0	0	0	0	0
nonsynonymous SNV	M246V	0	0	0	0	0	0	0	0	0	0	0	0	0	0	0	0	0	0	0	0	0	0	0	0	0	1	0	0	0	0	0	1	0	0	0	0	0	0	0	0	0	0	0	0	0	0	0	0
nonsynonymous SNV	M246I	0	0	0	0	0	0	0	0	0	0	0	0	0	0	0	0	0	0	0	0	0	0	0	0	0	1	0	0	0	0	0	1	0	0	0	0	0	0	0	0	0	0	0	0	0	0	0	0
nonsynonymous SNV	M246T	0	0	0	0	0	0	0	0	0	0	0	0	0	0	0	0	0	0	0	0	0	0	0	0	0	1	0	0	0	0	0	1	0	0	0	0	0	0	0	0	0	0	0	0	0	0	0	0
nonsynonymous SNV	M246R	0	0	0	0	0	0	0	0	0	0	0	0	0	0	0	0	0	0	0	0	0	0	0	1	0	1	0	0	0	0	0	1	0	0	0	0	0	0	0	0	0	0	0	0	0	0	0	0
nonsynonymous SNV	N247I	0	0	0	0	0	0	0	0	0	0	0	0	0	0	0	0	0	0	0	0	0	0	0	0	0	1	0	0	0	0	0	1	0	0	0	0	0	0	0	0	0	0	0	0	0	0	0	0
synonymous SNV	N247N	0	0	0	1	0	0	0	0	0	0	0	0	0	0	0	0	0	0	0	0	0	0	0	0	0	0	0	0	0	0	0	0	0	0	0	0	0	0	0	0	0	0	0	0	0	0	0	0
nonsynonymous SNV	N247K	0	0	0	0	0	0	0	0	0	0	0	0	0	0	0	0	0	0	0	0	0	0	0	0	0	1	0	0	0	0	0	1	0	0	0	0	0	0	0	0	0	0	0	0	0	0	0	0
frameshift deletion	R248fs	0	0	0	0	0	1	0	0	0	0	0	0	0	0	0	0	0	0	0	0	0	0	0	0	0	0	0	0	0	0	0	0	0	0	0	0	0	0	0	0	0	0	0	0	0	0	0	0
nonsynonymous SNV	R248L	0	0	0	0	0	0	0	0	1	0	0	0	0	0	0	1	0	0	0	0	0	0	0	1	0	1	0	0	0	0	0	1	0	0	0	0	0	0	0	0	0	0	0	0	0	0	0	0
nonsynonymous SNV	R248P	0	0	0	0	0	0	0	0	1	0	0	0	0	0	0	0	0	0	0	0	0	0	0	0	0	1	0	0	0	0	0	1	0	0	0	0	0	0	0	0	0	0	0	0	0	0	0	0
nonsynonymous SNV	R248Q	0	0	0	0	0	0	0	0	1	0	1	0	0	0	0	1	1	0	0	0	0	0	0	1	0	1	0	0	0	0	0	1	0	0	0	0	0	0	0	0	0	0	0	0	0	0	0	0
nonsynonymous SNV	R248W	0	0	0	0	0	0	0	0	1	0	0	1	0	0	0	1	1	0	0	0	0	0	0	1	0	1	0	0	0	0	0	1	0	0	0	0	0	0	0	0	0	0	0	0	0	0	0	0
nonsynonymous SNV	R248G	0	0	0	0	0	0	0	0	1	0	0	0	0	0	0	1	0	0	0	0	0	0	0	1	0	1	0	0	0	0	0	1	0	0	0	0	0	0	0	0	0	0	0	0	0	0	0	0
nonsynonymous SNV	R248Q	0	0	0	0	0	0	0	0	1	0	1	0	0	0	0	1	1	0	0	0	0	0	0	1	0	1	0	0	0	0	0	1	0	0	0	0	0	0	0	0	0	0	0	0	0	0	0	0
nonsynonymous SNV	R248L	0	0	0	0	0	0	0	0	1	0	0	0	0	0	0	1	0	0	0	0	0	0	0	1	0	1	0	0	0	0	0	1	0	0	0	0	0	0	0	0	0	0	0	0	0	0	0	0
synonymous SNV	R248R	0	0	0	1	0	0	0	0	0	0	0	0	0	0	0	0	0	0	0	0	0	0	0	0	0	0	0	0	0	0	0	0	0	0	0	0	0	0	0	0	0	0	0	0	0	0	0	0
nonsynonymous SNV	R248G	0	0	0	0	0	0	0	0	1	0	0	0	0	0	0	1	0	0	0	0	0	0	0	1	0	1	0	0	0	0	0	1	0	0	0	0	0	0	0	0	0	0	0	0	0	0	0	0
nonsynonymous SNV	R248W	0	0	0	0	0	0	0	0	1	0	0	1	0	0	0	1	1	0	0	0	0	0	0	1	0	1	0	0	0	0	0	1	0	0	0	0	0	0	0	0	0	0	0	0	0	0	0	0
nonsynonymous SNV	R249S	0	0	0	0	0	0	0	0	0	0	0	0	0	0	0	1	1	0	0	0	0	0	0	1	0	1	0	0	0	0	0	1	0	0	0	0	0	0	0	0	0	0	0	0	0	0	0	0
nonsynonymous SNV	R249M	0	0	0	0	0	0	0	0	0	0	0	0	0	0	0	0	0	0	0	0	0	0	0	0	0	1	0	0	0	0	0	1	0	0	0	0	0	0	0	0	0	0	0	0	0	0	0	0
nonsynonymous SNV	R249T	0	0	0	0	0	0	0	0	0	0	0	0	0	0	0	0	0	0	0	0	0	0	0	0	0	1	0	0	0	0	0	1	0	0	0	0	0	0	0	0	0	0	0	0	0	0	0	0
nonsynonymous SNV	R249W	0	0	0	0	0	0	0	0	0	0	0	0	0	0	0	0	0	0	0	0	0	0	0	0	0	1	0	0	0	0	0	1	0	0	0	0	0	0	0	0	0	0	0	0	0	0	0	0
nonsynonymous SNV	R249G	0	0	0	0	0	0	0	0	0	0	0	0	0	0	0	1	0	0	0	0	0	0	0	1	0	1	0	0	0	0	0	1	0	0	0	0	0	0	0	0	0	0	0	0	0	0	0	0
nonsynonymous SNV	R249S	0	0	0	0	0	0	0	0	0	0	0	0	0	0	0	1	1	0	0	0	0	0	0	1	0	1	0	0	0	0	0	1	0	0	0	0	0	0	0	0	0	0	0	0	0	0	0	0
synonymous SNV	R249R	0	0	0	1	0	0	0	0	0	0	0	0	0	0	0	0	0	0	0	0	0	0	0	0	0	0	0	0	0	0	0	0	0	0	0	0	0	0	0	0	0	0	0	0	0	0	0	0
frameshift deletion	P250fs	0	0	0	0	0	1	0	0	0	0	0	0	0	0	0	0	0	0	0	0	0	0	0	0	0	0	0	0	0	0	0	0	0	0	0	0	0	0	0	0	0	0	0	0	0	0	0	0
nonsynonymous SNV	P250L	0	0	0	0	0	0	0	0	0	0	0	0	0	0	0	0	0	0	0	0	0	0	0	1	0	1	0	0	0	0	0	1	0	0	0	0	0	0	0	0	0	0	0	0	0	0	0	0
nonsynonymous SNV	P250L	0	0	0	0	0	0	0	0	0	0	0	0	0	0	0	0	0	0	0	0	0	0	0	1	0	1	0	0	0	0	0	1	0	0	0	0	0	0	0	0	0	0	0	0	0	0	0	0
nonframeshift insertion	P250delinsRP	0	0	0	0	0	0	0	0	0	0	0	0	0	0	0	0	0	0	0	0	0	0	0	0	0	0	0	0	0	0	0	0	0	0	0	0	0	0	0	0	0	0	0	0	0	0	0	0
nonsynonymous SNV	I251F	0	0	0	0	0	0	0	0	0	0	0	0	0	0	0	0	0	0	0	0	0	0	0	0	0	1	0	1	0	0	0	1	0	0	0	0	0	0	0	0	1	0	0	0	0	0	0	0
nonsynonymous SNV	I251T	0	0	0	0	0	0	0	0	0	0	0	0	0	0	0	0	0	0	0	0	0	0	0	1	0	1	0	1	0	0	0	1	0	0	0	0	0	0	0	0	1	0	0	0	0	0	0	0
nonsynonymous SNV	I251N	0	0	0	0	0	0	0	0	0	0	0	0	0	0	0	0	0	0	0	0	0	0	0	1	0	1	0	1	0	0	0	1	0	0	0	0	0	0	0	0	1	0	0	0	0	0	0	0
frameshift insertion	I251fs	0	0	0	0	0	1	0	0	0	0	0	0	0	0	0	0	0	0	0	0	0	0	0	0	0	0	0	0	0	0	0	0	0	0	0	0	0	0	0	0	0	0	0	0	0	0	0	0
nonsynonymous SNV	I251L	0	0	0	0	0	0	0	0	0	0	0	0	0	0	0	0	0	0	0	0	0	0	0	0	0	1	0	1	0	0	0	1	0	0	0	0	0	0	0	0	1	0	0	0	0	0	0	0
nonframeshift deletion	252del	0	0	0	0	0	0	0	0	0	0	0	0	0	0	0	0	0	0	0	0	0	0	0	0	0	0	0	0	0	0	0	0	0	0	0	0	0	0	0	0	0	0	0	0	0	0	0	0
nonsynonymous SNV	L252P	0	0	0	0	0	0	0	0	0	0	0	0	0	0	0	0	0	0	0	0	0	0	0	0	0	0	0	0	0	0	0	0	0	0	0	0	0	0	0	0	1	0	0	0	0	0	0	0
frameshift deletion	L252fs	0	0	0	0	0	1	0	0	0	0	0	0	0	0	0	0	0	0	0	0	0	0	0	0	0	0	0	0	0	0	0	0	0	0	0	0	0	0	0	0	0	0	0	0	0	0	0	0
frameshift deletion	L252fs	0	0	0	0	0	1	0	0	0	0	0	0	0	0	0	0	0	0	0	0	0	0	0	0	0	0	0	0	0	0	0	0	0	0	0	0	0	0	0	0	0	0	0	0	0	0	0	0
nonsynonymous SNV	T253I	0	0	0	0	0	0	0	0	0	0	0	0	0	0	0	0	0	0	0	0	0	0	0	0	0	0	0	0	0	0	0	0	0	0	0	0	0	0	0	0	1	0	0	0	0	0	0	0
nonframeshift deletion	254del	0	0	0	0	0	0	0	0	0	0	0	0	0	0	0	0	0	0	0	0	0	0	0	0	0	0	0	0	0	0	0	0	0	0	0	0	0	0	0	0	0	0	0	0	0	0	0	0
nonsynonymous SNV	I254S	0	0	0	0	0	0	0	0	0	0	0	0	0	0	0	0	0	0	0	0	0	0	0	1	0	0	0	0	0	0	0	0	0	0	0	0	0	0	0	0	1	0	0	0	0	0	0	0
nonsynonymous SNV	I254S	0	0	0	0	0	0	0	0	0	0	0	0	0	0	0	0	0	0	0	0	0	0	0	1	0	0	0	0	0	0	0	0	0	0	0	0	0	0	0	0	1	0	0	0	0	0	0	0
nonsynonymous SNV	I254N	0	0	0	0	0	0	0	0	0	0	0	0	0	0	0	0	0	0	0	0	0	0	0	0	0	0	0	0	0	0	0	0	0	0	0	0	0	0	0	0	1	0	0	0	0	0	0	0
nonsynonymous SNV	I254V	0	0	0	0	0	0	0	0	0	0	0	0	0	0	0	0	0	0	0	0	0	0	0	0	0	0	0	0	0	0	0	0	0	0	0	0	0	0	0	0	1	0	0	0	0	0	0	0
nonsynonymous SNV	I255S	0	0	0	0	0	0	0	0	0	0	0	0	0	0	0	0	0	0	0	0	0	0	0	1	0	0	0	1	0	0	0	0	0	0	0	0	0	0	0	0	1	0	0	0	0	0	0	0
nonsynonymous SNV	I255N	0	0	0	0	0	0	0	0	0	0	0	0	0	0	0	0	0	0	0	0	0	0	0	1	0	0	0	1	0	0	0	0	0	0	0	0	0	0	0	0	1	0	0	0	0	0	0	0
nonsynonymous SNV	I255F	0	0	0	0	0	0	0	0	0	0	0	0	0	0	0	0	0	0	0	0	0	0	0	0	0	0	0	1	0	0	0	0	0	0	0	0	0	0	0	0	1	0	0	0	0	0	0	0
nonsynonymous SNV	I255S	0	0	0	0	0	0	0	0	0	0	0	0	0	0	0	0	0	0	0	0	0	0	0	1	0	0	0	1	0	0	0	0	0	0	0	0	0	0	0	0	1	0	0	0	0	0	0	0
nonsynonymous SNV	I255T	0	0	0	0	0	0	0	0	0	0	0	0	0	0	0	0	0	0	0	0	0	0	0	0	0	0	0	1	0	0	0	0	0	0	0	0	0	0	0	0	1	0	0	0	0	0	0	0
nonsynonymous SNV	I255N	0	0	0	0	0	0	0	0	0	0	0	0	0	0	0	0	0	0	0	0	0	0	0	1	0	0	0	1	0	0	0	0	0	0	0	0	0	0	0	0	1	0	0	0	0	0	0	0
frameshift insertion	T256fs	0	0	0	0	0	1	0	0	0	0	0	0	0	0	0	0	0	0	0	0	0	0	0	0	0	0	0	0	0	0	0	0	0	0	0	0	0	0	0	0	0	0	0	0	0	0	0	0
nonsynonymous SNV	T256I	0	0	0	0	0	0	0	0	0	0	0	0	0	0	0	0	0	0	0	0	0	0	0	0	0	0	0	0	0	0	0	0	0	0	0	0	0	0	0	0	1	0	0	0	0	0	0	0
nonframeshift deletion	256del	0	0	0	0	0	0	0	0	0	0	0	0	0	0	0	0	0	0	0	0	0	0	0	0	0	0	0	0	0	0	0	0	0	0	0	0	0	0	0	0	0	0	0	0	0	0	0	0
frameshift deletion	T256fs	0	0	0	0	0	1	0	0	0	0	0	0	0	0	0	0	0	0	0	0	0	0	0	0	0	0	0	0	0	0	0	0	0	0	0	0	0	0	0	0	0	0	0	0	0	0	0	0
frameshift insertion	T256fs	0	0	0	0	0	1	0	0	0	0	0	0	0	0	0	0	0	0	0	0	0	0	0	0	0	0	0	0	0	0	0	0	0	0	0	0	0	0	0	0	0	0	0	0	0	0	0	0
nonsynonymous SNV	L257P	0	0	0	0	0	0	0	0	0	0	0	0	0	0	0	0	0	0	0	0	0	0	0	0	0	0	0	0	0	0	0	0	0	0	0	0	0	0	0	0	1	0	0	0	0	0	0	0
nonsynonymous SNV	L257Q	0	0	0	0	0	0	0	0	0	0	0	0	0	0	0	0	0	0	0	0	0	0	0	0	0	0	0	0	0	0	0	0	0	0	0	0	0	0	0	0	1	0	0	0	0	0	0	0
nonsynonymous SNV	E258D	0	0	0	0	0	0	0	0	0	0	0	0	0	0	0	0	0	0	0	0	0	0	0	0	0	0	0	1	0	0	0	0	0	0	0	0	0	0	0	0	1	0	0	0	0	0	0	0
nonsynonymous SNV	E258A	0	0	0	0	0	0	0	0	0	0	0	0	0	0	0	0	0	0	0	0	0	0	0	0	0	0	0	1	0	0	0	0	0	0	0	0	0	0	0	0	1	0	0	0	0	0	0	0
stopgain	E258X	1	0	0	0	0	0	0	0	0	0	0	0	0	0	0	0	0	0	0	0	0	0	0	0	0	0	0	0	0	0	0	0	0	0	0	0	0	0	0	0	0	0	0	0	0	0	0	0
nonsynonymous SNV	E258Q	0	0	0	0	0	0	0	0	0	0	0	0	0	0	0	0	0	0	0	0	0	0	0	0	0	0	0	1	0	0	0	0	0	0	0	0	0	0	0	0	1	0	0	0	0	0	0	0
nonsynonymous SNV	E258K	0	0	0	0	0	0	0	0	0	0	0	0	0	0	0	0	0	0	0	0	0	0	0	1	0	0	0	1	0	0	0	0	0	0	0	0	0	0	0	0	1	0	0	0	0	0	0	0
stopgain	E258X	1	0	0	0	0	0	0	0	0	0	0	0	0	0	0	0	0	0	0	0	0	0	0	0	0	0	0	0	0	0	0	0	0	0	0	0	0	0	0	0	0	0	0	0	0	0	0	0
nonsynonymous SNV	E258K	0	0	0	0	0	0	0	0	0	0	0	0	0	0	0	0	0	0	0	0	0	0	0	1	0	0	0	1	0	0	0	0	0	0	0	0	0	0	0	0	1	0	0	0	0	0	0	0
nonsynonymous SNV	D259V	0	0	0	0	0	0	0	0	0	0	0	0	0	0	0	0	0	0	0	0	0	0	0	0	0	0	0	1	0	0	0	0	0	0	0	0	0	0	0	0	0	0	0	0	0	0	0	0
nonsynonymous SNV	D259Y	0	0	0	0	0	0	0	0	0	0	0	0	0	0	0	0	0	0	0	0	0	0	0	0	0	0	0	1	0	0	0	0	0	0	0	0	0	0	0	0	0	0	0	0	0	0	0	0
nonsynonymous SNV	D259V	0	0	0	0	0	0	0	0	0	0	0	0	0	0	0	0	0	0	0	0	0	0	0	0	0	0	0	1	0	0	0	0	0	0	0	0	0	0	0	0	0	0	0	0	0	0	0	0
nonsynonymous SNV	D259Y	0	0	0	0	0	0	0	0	0	0	0	0	0	0	0	0	0	0	0	0	0	0	0	0	0	0	0	1	0	0	0	0	0	0	0	0	0	0	0	0	0	0	0	0	0	0	0	0
frameshift deletion	S260fs	0	0	0	0	0	1	0	0	0	0	0	0	0	0	0	0	0	0	0	0	0	0	0	0	0	0	0	0	0	0	0	0	0	0	0	0	0	0	0	0	0	0	0	0	0	0	0	0
frameshift deletion	S261fs	0	0	0	0	0	1	0	0	0	0	0	0	0	0	0	0	0	0	0	0	0	0	0	0	0	0	0	0	0	0	0	0	0	0	0	0	0	0	0	0	0	0	0	0	0	0	0	0
frameshift deletion	S261fs	0	0	0	0	0	1	0	0	0	0	0	0	0	0	0	0	0	0	0	0	0	0	0	0	0	0	0	0	0	0	0	0	0	0	0	0	0	0	0	0	0	0	0	0	0	0	0	0
nonsynonymous SNV	S261T	0	0	0	0	0	0	0	0	0	0	0	0	0	0	0	0	0	0	0	0	0	0	0	0	0	0	0	0	0	0	0	0	0	0	0	0	0	0	0	0	0	0	0	0	0	0	0	0
nonsynonymous SNV	G262V	0	0	0	0	0	0	0	0	0	0	0	0	0	0	0	0	0	0	0	0	0	0	0	1	0	0	0	0	0	0	0	0	0	0	0	0	0	0	0	0	0	0	0	0	0	0	0	0
stopgain	G262X	1	0	0	0	0	0	0	0	0	0	0	0	0	0	0	0	0	0	0	0	0	0	0	0	0	0	0	0	0	0	0	0	0	0	0	0	0	0	0	0	0	0	0	0	0	0	0	0
nonsynonymous SNV	G262V	0	0	0	0	0	0	0	0	0	0	0	0	0	0	0	0	0	0	0	0	0	0	0	1	0	0	0	0	0	0	0	0	0	0	0	0	0	0	0	0	0	0	0	0	0	0	0	0
nonsynonymous SNV	G262D	0	0	0	0	0	0	0	0	0	0	0	0	0	0	0	0	0	0	0	0	0	0	0	0	0	0	0	0	0	0	0	0	0	0	0	0	0	0	0	0	0	0	0	0	0	0	0	0
nonsynonymous SNV	G262S	0	0	0	0	0	0	0	0	0	0	0	0	0	0	0	0	0	0	0	0	0	0	0	0	0	0	0	0	0	0	0	0	0	0	0	0	0	0	0	0	0	0	0	0	0	0	0	0
frameshift deletion	N263fs	0	0	0	0	0	1	0	0	0	0	0	0	0	0	0	0	0	0	0	0	0	0	0	0	0	0	0	0	0	0	0	0	0	0	0	0	0	0	0	0	0	0	0	0	0	0	0	0
nonsynonymous SNV	L264R	0	0	0	0	0	0	0	0	0	0	0	0	0	0	0	0	0	0	0	0	0	0	0	0	0	0	0	1	0	0	0	0	0	0	1	0	0	0	0	0	0	0	0	0	0	0	0	0
synonymous SNV	L265L	0	0	0	1	0	0	0	0	0	0	0	0	0	0	0	0	0	0	0	0	0	0	0	0	0	0	0	1	0	0	0	0	0	0	1	0	0	0	0	0	0	0	0	0	0	0	0	0
nonsynonymous SNV	L265R	0	0	0	0	0	0	0	0	0	0	0	0	0	0	0	0	0	0	0	0	0	0	0	0	0	0	0	1	0	0	0	0	0	0	1	0	0	0	0	0	0	0	0	0	0	0	0	0
nonsynonymous SNV	L265P	0	0	0	0	0	0	0	0	0	0	0	0	0	0	0	0	0	0	0	0	0	0	0	1	0	0	0	1	0	0	0	0	0	0	1	0	0	0	0	0	0	0	0	0	0	0	0	0
frameshift insertion	L265fs	0	0	0	0	0	1	0	0	0	0	0	0	0	0	0	0	0	0	0	0	0	0	0	0	0	0	0	0	0	0	0	0	0	0	0	0	0	0	0	0	0	0	0	0	0	0	0	0
nonsynonymous SNV	L265P	0	0	0	0	0	0	0	0	0	0	0	0	0	0	0	0	0	0	0	0	0	0	0	1	0	0	0	1	0	0	0	0	0	0	1	0	0	0	0	0	0	0	0	0	0	0	0	0
frameshift deletion	G266fs	0	0	0	0	0	1	0	0	0	0	0	0	0	0	0	0	0	0	0	0	0	0	0	0	0	0	0	0	0	0	0	0	0	0	0	0	0	0	0	0	0	0	0	0	0	0	0	0
nonsynonymous SNV	G266V	0	0	0	0	0	0	0	0	0	0	0	0	0	0	0	0	0	0	0	0	0	0	0	1	0	0	0	1	0	0	0	0	0	0	1	0	0	0	0	0	0	0	0	0	0	0	0	0
nonsynonymous SNV	G266E	0	0	0	0	0	0	0	0	0	0	0	0	0	0	0	0	0	0	0	0	0	0	0	1	0	0	0	1	0	0	0	0	0	0	1	0	0	0	0	0	0	0	0	0	0	0	0	0
stopgain	G266X	1	0	0	0	0	0	0	0	0	0	0	0	0	0	0	0	0	0	0	0	0	0	0	0	0	0	0	0	0	0	0	0	0	0	0	0	0	0	0	0	0	0	0	0	0	0	0	0
nonsynonymous SNV	G266R	0	0	0	0	0	0	0	0	0	0	0	0	0	0	0	0	0	0	0	0	0	0	0	1	0	0	0	1	0	0	0	0	0	0	1	0	0	0	0	0	0	0	0	0	0	0	0	0
nonsynonymous SNV	G266E	0	0	0	0	0	0	0	0	0	0	0	0	0	0	0	0	0	0	0	0	0	0	0	1	0	0	0	1	0	0	0	0	0	0	1	0	0	0	0	0	0	0	0	0	0	0	0	0
nonsynonymous SNV	G266V	0	0	0	0	0	0	0	0	0	0	0	0	0	0	0	0	0	0	0	0	0	0	0	1	0	0	0	1	0	0	0	0	0	0	1	0	0	0	0	0	0	0	0	0	0	0	0	0
nonsynonymous SNV	G266R	0	0	0	0	0	0	0	0	0	0	0	0	0	0	0	0	0	0	0	0	0	0	0	1	0	0	0	1	0	0	0	0	0	0	1	0	0	0	0	0	0	0	0	0	0	0	0	0
nonsynonymous SNV	R267L	0	0	0	0	0	0	0	0	0	0	0	0	0	0	0	0	0	0	0	0	0	0	0	0	0	0	0	1	0	0	0	0	0	0	1	0	0	0	0	0	0	0	0	0	0	0	0	0
nonsynonymous SNV	R267P	0	0	0	0	0	0	0	0	0	0	0	0	0	0	0	0	0	0	0	0	0	0	0	1	0	0	0	1	0	0	0	0	0	0	1	0	0	0	0	0	0	0	0	0	0	0	0	0
nonsynonymous SNV	R267Q	0	0	0	0	0	0	0	0	0	0	0	0	0	0	0	0	0	0	0	0	0	0	0	0	0	0	0	1	0	0	0	0	0	0	1	0	0	0	0	0	0	0	0	0	0	0	0	0
nonsynonymous SNV	R267W	0	0	0	0	0	0	0	0	0	0	0	0	0	0	0	0	0	0	0	0	0	0	0	1	0	0	0	1	0	0	0	0	0	0	1	0	0	0	0	0	0	0	0	0	0	0	0	0
frameshift deletion	R267fs	0	0	0	0	0	1	0	0	0	0	0	0	0	0	0	0	0	0	0	0	0	0	0	0	0	0	0	0	0	0	0	0	0	0	0	0	0	0	0	0	0	0	0	0	0	0	0	0
nonsynonymous SNV	R267P	0	0	0	0	0	0	0	0	0	0	0	0	0	0	0	0	0	0	0	0	0	0	0	1	0	0	0	1	0	0	0	0	0	0	1	0	0	0	0	0	0	0	0	0	0	0	0	0
nonsynonymous SNV	R267L	0	0	0	0	0	0	0	0	0	0	0	0	0	0	0	0	0	0	0	0	0	0	0	0	0	0	0	1	0	0	0	0	0	0	1	0	0	0	0	0	0	0	0	0	0	0	0	0
nonsynonymous SNV	R267W	0	0	0	0	0	0	0	0	0	0	0	0	0	0	0	0	0	0	0	0	0	0	0	1	0	0	0	1	0	0	0	0	0	0	1	0	0	0	0	0	0	0	0	0	0	0	0	0
frameshift deletion	N268fs	0	0	0	0	0	1	0	0	0	0	0	0	0	0	0	0	0	0	0	0	0	0	0	0	0	0	0	0	0	0	0	0	0	0	0	0	0	0	0	0	0	0	0	0	0	0	0	0
nonsynonymous SNV	N268I	0	0	0	0	0	0	0	0	0	0	0	0	0	0	0	0	0	0	0	0	0	0	0	0	0	0	0	1	0	0	0	0	0	0	1	0	0	0	0	0	0	0	0	0	0	0	0	0
nonsynonymous SNV	F270L	0	0	0	0	0	0	0	0	0	0	0	0	0	0	0	0	0	0	0	0	0	0	0	0	0	0	0	0	0	0	0	0	0	0	0	0	0	0	0	0	0	0	0	0	0	0	0	0
nonsynonymous SNV	F270C	0	0	0	0	0	0	0	0	0	0	0	0	0	0	0	0	0	0	0	0	0	0	0	0	0	0	0	0	0	0	0	0	0	0	0	0	0	0	0	0	0	0	0	0	0	0	0	0
nonsynonymous SNV	F270S	0	0	0	0	0	0	0	0	0	0	0	0	0	0	0	0	0	0	0	0	0	0	0	0	0	0	0	0	0	0	0	0	0	0	0	0	0	0	0	0	0	0	0	0	0	0	0	0
nonsynonymous SNV	F270V	0	0	0	0	0	0	0	0	0	0	0	0	0	0	0	0	0	0	0	0	0	0	0	0	0	0	0	0	0	0	0	0	0	0	0	0	0	0	0	0	0	0	0	0	0	0	0	0
nonsynonymous SNV	F270I	0	0	0	0	0	0	0	0	0	0	0	0	0	0	0	0	0	0	0	0	0	0	0	0	0	0	0	0	0	0	0	0	0	0	0	0	0	0	0	0	0	0	0	0	0	0	0	0
frameshift insertion	F270fs	0	0	0	0	0	1	0	0	0	0	0	0	0	0	0	0	0	0	0	0	0	0	0	0	0	0	0	0	0	0	0	0	0	0	0	0	0	0	0	0	0	0	0	0	0	0	0	0
nonsynonymous SNV	E271V	0	0	0	0	0	0	0	0	0	0	0	0	0	0	0	0	0	0	0	0	0	0	0	0	0	0	0	0	0	0	0	0	0	0	0	0	0	0	0	0	0	0	0	0	0	0	0	0
stopgain	E271X	1	0	0	0	0	0	0	0	0	0	0	0	0	0	0	0	0	0	0	0	0	0	0	0	0	0	0	0	0	0	0	0	0	0	0	0	0	0	0	0	0	0	0	0	0	0	0	0
nonsynonymous SNV	E271K	0	0	0	0	0	0	0	0	0	0	0	0	0	0	0	0	0	0	0	0	0	0	0	0	0	0	0	0	0	0	0	0	0	0	0	0	0	0	0	0	0	0	0	0	0	0	0	0
nonsynonymous SNV	E271K	0	0	0	0	0	0	0	0	0	0	0	0	0	0	0	0	0	0	0	0	0	0	0	0	0	0	0	0	0	0	0	0	0	0	0	0	0	0	0	0	0	0	0	0	0	0	0	0
stopgain	E271X	1	0	0	0	0	0	0	0	0	0	0	0	0	0	0	0	0	0	0	0	0	0	0	0	0	0	0	0	0	0	0	0	0	0	0	0	0	0	0	0	0	0	0	0	0	0	0	0
nonsynonymous SNV	V272G	0	0	0	0	0	0	0	0	0	0	0	0	0	0	0	0	0	0	0	0	0	0	0	0	1	0	0	0	0	0	1	0	0	0	1	0	0	0	0	0	0	0	0	0	0	0	0	0
frameshift deletion	V272fs	0	0	0	0	0	1	0	0	0	0	0	0	0	0	0	0	0	0	0	0	0	0	0	0	0	0	0	0	0	0	0	0	0	0	0	0	0	0	0	0	0	0	0	0	0	0	0	0
nonsynonymous SNV	V272M	0	0	0	0	0	0	0	0	0	0	0	0	0	0	0	1	1	0	0	0	0	0	0	0	1	0	0	0	0	0	1	0	0	0	1	0	0	0	0	0	0	0	0	0	0	0	0	0
nonsynonymous SNV	V272L	0	0	0	0	0	0	0	0	0	0	0	0	0	0	0	1	0	0	0	0	0	0	0	0	1	0	0	0	0	0	1	0	0	0	1	0	0	0	0	0	0	0	0	0	0	0	0	0
nonsynonymous SNV	V272M	0	0	0	0	0	0	0	0	0	0	0	0	0	0	0	1	1	0	0	0	0	0	0	0	1	0	0	0	0	0	1	0	0	0	1	0	0	0	0	0	0	0	0	0	0	0	0	0
frameshift deletion	V272fs	0	0	0	0	0	1	0	0	0	0	0	0	0	0	0	0	0	0	0	0	0	0	0	0	0	0	0	0	0	0	0	0	0	0	0	0	0	0	0	0	0	0	0	0	0	0	0	0
nonsynonymous SNV	R273L	0	0	0	0	0	0	0	0	1	0	0	0	0	0	0	1	1	0	0	0	0	0	0	1	1	0	0	0	0	0	1	0	0	0	1	0	0	0	0	0	0	0	0	0	0	0	0	0
nonsynonymous SNV	R273P	0	0	0	0	0	0	0	0	1	0	0	0	0	0	0	0	0	0	0	0	0	0	0	0	1	0	0	0	0	0	1	0	0	0	1	0	0	0	0	0	0	0	0	0	0	0	0	0
nonsynonymous SNV	R273H	0	0	0	0	0	0	0	0	1	0	0	0	0	1	0	1	1	0	0	0	0	0	0	0	1	0	0	0	0	0	1	0	0	0	1	0	0	0	0	0	0	0	0	0	0	0	0	0
nonframeshift deletion	273del	0	0	0	0	0	0	0	0	1	0	0	0	0	0	0	0	0	0	0	0	0	0	0	0	0	0	0	0	0	0	0	0	0	0	0	0	0	0	0	0	0	0	0	0	0	0	0	0
nonsynonymous SNV	R273C	0	0	0	0	0	0	0	0	1	0	0	0	0	0	1	1	1	0	0	0	0	0	0	1	1	0	0	0	0	0	1	0	0	0	1	0	0	0	0	0	0	0	0	0	0	0	0	0
nonsynonymous SNV	R273S	0	0	0	0	0	0	0	0	1	0	0	0	0	0	0	0	0	0	0	0	0	0	0	0	1	0	0	0	0	0	1	0	0	0	1	0	0	0	0	0	0	0	0	0	0	0	0	0
nonsynonymous SNV	R273H	0	0	0	0	0	0	0	0	1	0	0	0	0	1	0	1	1	0	0	0	0	0	0	0	1	0	0	0	0	0	1	0	0	0	1	0	0	0	0	0	0	0	0	0	0	0	0	0
nonsynonymous SNV	R273L	0	0	0	0	0	0	0	0	1	0	0	0	0	0	0	1	1	0	0	0	0	0	0	1	1	0	0	0	0	0	1	0	0	0	1	0	0	0	0	0	0	0	0	0	0	0	0	0
nonsynonymous SNV	R273C	0	0	0	0	0	0	0	0	1	0	0	0	0	0	1	1	1	0	0	0	0	0	0	1	1	0	0	0	0	0	1	0	0	0	1	0	0	0	0	0	0	0	0	0	0	0	0	0
nonsynonymous SNV	R273S	0	0	0	0	0	0	0	0	1	0	0	0	0	0	0	0	0	0	0	0	0	0	0	0	1	0	0	0	0	0	1	0	0	0	1	0	0	0	0	0	0	0	0	0	0	0	0	0
frameshift deletion	V274fs	0	0	0	0	0	1	0	0	0	0	0	0	0	0	0	0	0	0	0	0	0	0	0	0	0	0	0	0	0	0	0	0	0	0	0	0	0	0	0	0	0	0	0	0	0	0	0	0
nonsynonymous SNV	V274G	0	0	0	0	0	0	0	0	0	0	0	0	0	0	0	0	0	0	0	0	0	0	0	0	1	0	0	0	0	0	1	0	0	0	1	0	0	0	0	0	0	0	0	0	0	0	0	0
nonsynonymous SNV	V274D	0	0	0	0	0	0	0	0	0	0	0	0	0	0	0	0	0	0	0	0	0	0	0	0	1	0	0	0	0	0	1	0	0	0	1	0	0	0	0	0	0	0	0	0	0	0	0	0
nonsynonymous SNV	V274F	0	0	0	0	0	0	0	0	0	0	0	0	0	0	0	0	0	0	0	0	0	0	0	0	1	0	0	0	0	0	1	0	0	0	1	0	0	0	0	0	0	0	0	0	0	0	0	0
nonsynonymous SNV	V274L	0	0	0	0	0	0	0	0	0	0	0	0	0	0	0	0	0	0	0	0	0	0	0	0	1	0	0	0	0	0	1	0	0	0	1	0	0	0	0	0	0	0	0	0	0	0	0	0
frameshift deletion	V274fs	0	0	0	0	0	1	0	0	0	0	0	0	0	0	0	0	0	0	0	0	0	0	0	0	0	0	0	0	0	0	0	0	0	0	0	0	0	0	0	0	0	0	0	0	0	0	0	0
nonsynonymous SNV	V274F	0	0	0	0	0	0	0	0	0	0	0	0	0	0	0	0	0	0	0	0	0	0	0	0	1	0	0	0	0	0	1	0	0	0	1	0	0	0	0	0	0	0	0	0	0	0	0	0
frameshift deletion	C275fs	0	0	0	0	0	1	0	0	0	0	0	0	0	0	0	0	0	0	0	0	0	0	0	0	0	0	0	0	0	0	0	0	0	0	0	0	0	0	0	0	0	0	0	0	0	0	0	0
nonsynonymous SNV	C275F	0	0	0	0	0	0	0	0	0	0	0	0	0	0	0	0	0	0	0	0	0	0	0	0	1	0	0	0	0	0	1	0	0	0	0	0	0	0	0	0	0	0	0	0	0	0	0	0
nonsynonymous SNV	C275S	0	0	0	0	0	0	0	0	0	0	0	0	0	0	0	0	0	0	0	0	0	0	0	0	1	0	0	0	0	0	1	0	0	0	0	0	0	0	0	0	0	0	0	0	0	0	0	0
nonsynonymous SNV	C275Y	0	0	0	0	0	0	0	0	0	0	0	0	0	0	0	0	0	0	0	0	0	0	0	1	1	0	0	0	0	0	1	0	0	0	0	0	0	0	0	0	0	0	0	0	0	0	0	0
nonsynonymous SNV	C275F	0	0	0	0	0	0	0	0	0	0	0	0	0	0	0	0	0	0	0	0	0	0	0	0	1	0	0	0	0	0	1	0	0	0	0	0	0	0	0	0	0	0	0	0	0	0	0	0
nonsynonymous SNV	C275Y	0	0	0	0	0	0	0	0	0	0	0	0	0	0	0	0	0	0	0	0	0	0	0	1	1	0	0	0	0	0	1	0	0	0	0	0	0	0	0	0	0	0	0	0	0	0	0	0
nonsynonymous SNV	C275G	0	0	0	0	0	0	0	0	0	0	0	0	0	0	0	0	0	0	0	0	0	0	0	1	1	0	0	0	0	0	1	0	0	0	0	0	0	0	0	0	0	0	0	0	0	0	0	0
synonymous SNV	A276A	0	0	0	1	0	0	0	0	0	0	0	0	0	0	0	0	0	0	0	0	0	0	0	0	0	0	0	0	0	0	0	0	0	0	0	0	0	0	0	0	0	0	0	0	0	0	0	0
nonsynonymous SNV	A276G	0	0	0	0	0	0	0	0	0	0	0	0	0	0	0	0	0	0	0	0	0	0	0	0	1	0	0	0	0	0	1	0	0	0	0	0	0	0	0	0	0	0	0	0	0	0	0	0
nonsynonymous SNV	A276P	0	0	0	0	0	0	0	0	0	0	0	0	0	0	0	0	0	0	0	0	0	0	0	0	1	0	0	0	0	0	1	0	0	0	0	0	0	0	0	0	0	0	0	0	0	0	0	0
stopgain	C277X	1	0	0	0	0	0	0	0	0	0	0	0	0	0	0	0	0	0	0	0	0	0	0	0	0	0	0	0	0	0	0	0	0	0	0	0	0	0	0	0	0	0	0	0	0	0	0	0
nonsynonymous SNV	C277F	0	0	0	0	0	0	0	0	0	0	0	0	0	0	0	0	0	0	0	0	0	0	0	1	1	0	0	0	0	0	1	0	0	0	0	0	0	0	0	0	0	0	0	0	0	0	0	0
nonsynonymous SNV	C277F	0	0	0	0	0	0	0	0	0	0	0	0	0	0	0	0	0	0	0	0	0	0	0	1	1	0	0	0	0	0	1	0	0	0	0	0	0	0	0	0	0	0	0	0	0	0	0	0
nonsynonymous SNV	P278L	0	0	0	0	0	0	0	0	0	0	0	0	0	0	0	0	0	0	0	0	0	0	0	1	1	0	0	0	0	0	1	0	0	0	0	0	0	0	0	0	0	0	0	0	0	0	0	0
nonsynonymous SNV	P278R	0	0	0	0	0	0	0	0	0	0	0	0	0	0	0	0	0	0	0	0	0	0	0	0	1	0	0	0	0	0	1	0	0	0	0	0	0	0	0	0	0	0	0	0	0	0	0	0
nonsynonymous SNV	P278H	0	0	0	0	0	0	0	0	0	0	0	0	0	0	0	0	0	0	0	0	0	0	0	1	1	0	0	0	0	0	1	0	0	0	0	0	0	0	0	0	0	0	0	0	0	0	0	0
nonsynonymous SNV	P278S	0	0	0	0	0	0	0	0	0	0	0	0	0	0	0	0	0	0	0	0	0	0	0	1	1	0	0	0	0	0	1	0	0	0	0	0	0	0	0	0	0	0	0	0	0	0	0	0
nonsynonymous SNV	P278A	0	0	0	0	0	0	0	0	0	0	0	0	0	0	0	0	0	0	0	0	0	0	0	0	1	0	0	0	0	0	1	0	0	0	0	0	0	0	0	0	0	0	0	0	0	0	0	0
nonsynonymous SNV	P278T	0	0	0	0	0	0	0	0	0	0	0	0	0	0	0	0	0	0	0	0	0	0	0	0	1	0	0	0	0	0	1	0	0	0	0	0	0	0	0	0	0	0	0	0	0	0	0	0
nonsynonymous SNV	P278H	0	0	0	0	0	0	0	0	0	0	0	0	0	0	0	0	0	0	0	0	0	0	0	1	1	0	0	0	0	0	1	0	0	0	0	0	0	0	0	0	0	0	0	0	0	0	0	0
nonsynonymous SNV	P278L	0	0	0	0	0	0	0	0	0	0	0	0	0	0	0	0	0	0	0	0	0	0	0	1	1	0	0	0	0	0	1	0	0	0	0	0	0	0	0	0	0	0	0	0	0	0	0	0
nonsynonymous SNV	P278A	0	0	0	0	0	0	0	0	0	0	0	0	0	0	0	0	0	0	0	0	0	0	0	0	1	0	0	0	0	0	1	0	0	0	0	0	0	0	0	0	0	0	0	0	0	0	0	0
nonsynonymous SNV	P278S	0	0	0	0	0	0	0	0	0	0	0	0	0	0	0	0	0	0	0	0	0	0	0	1	1	0	0	0	0	0	1	0	0	0	0	0	0	0	0	0	0	0	0	0	0	0	0	0
frameshift deletion	G279fs	0	0	0	0	0	1	0	0	0	0	0	0	0	0	0	0	0	0	0	0	0	0	0	0	0	0	0	0	0	0	0	0	0	0	0	0	0	0	0	0	0	0	0	0	0	0	0	0
nonsynonymous SNV	G279E	0	0	0	0	0	0	0	0	0	0	0	0	0	0	0	0	0	0	0	0	0	0	0	0	1	0	0	0	0	0	1	0	0	0	0	0	0	0	0	0	0	0	0	0	0	0	0	0
nonframeshift deletion	279del	0	0	0	0	0	0	0	0	0	0	0	0	0	0	0	0	0	0	0	0	0	0	0	0	0	0	0	0	0	0	0	0	0	0	0	0	0	0	0	0	0	0	0	0	0	0	0	0
nonsynonymous SNV	G279R	0	0	0	0	0	0	0	0	0	0	0	0	0	0	0	0	0	0	0	0	0	0	0	0	1	0	0	0	0	0	1	0	0	0	0	0	0	0	0	0	0	0	0	0	0	0	0	0
frameshift deletion	R280fs	0	0	0	0	0	1	0	0	0	0	0	0	0	0	0	0	0	0	0	0	0	0	0	0	0	0	0	0	0	0	0	0	0	0	0	0	0	0	0	0	0	0	0	0	0	0	0	0
nonsynonymous SNV	R280S	0	0	0	0	0	0	0	0	0	0	0	0	0	0	0	0	0	0	0	0	0	0	0	0	1	0	0	0	0	0	1	0	0	0	0	0	0	0	0	0	0	0	0	0	0	0	0	0
nonsynonymous SNV	R280I	0	0	0	0	0	0	0	0	0	0	0	0	0	0	0	0	0	0	0	0	0	0	0	0	1	0	0	0	0	0	1	0	0	0	0	0	0	0	0	0	0	0	0	0	0	0	0	0
nonsynonymous SNV	R280T	0	0	0	0	0	0	0	0	0	0	0	0	0	0	0	0	0	0	0	0	0	0	0	1	1	0	0	0	0	0	1	0	0	0	0	0	0	0	0	0	0	0	0	0	0	0	0	0
nonsynonymous SNV	R280K	0	0	0	0	0	0	0	0	0	0	0	0	0	0	0	0	0	0	0	0	0	0	0	0	1	0	0	0	0	0	1	0	0	0	0	0	0	0	0	0	0	0	0	0	0	0	0	0
stopgain	R280X	1	0	0	0	0	0	0	0	0	0	0	0	0	0	0	0	0	0	0	0	0	0	0	0	0	0	0	0	0	0	0	0	0	0	0	0	0	0	0	0	0	0	0	0	0	0	0	0
nonsynonymous SNV	R280G	0	0	0	0	0	0	0	0	0	0	0	0	0	0	0	0	0	0	0	0	0	0	0	1	1	0	0	0	0	0	1	0	0	0	0	0	0	0	0	0	0	0	0	0	0	0	0	0
nonsynonymous SNV	R280S	0	0	0	0	0	0	0	0	0	0	0	0	0	0	0	0	0	0	0	0	0	0	0	0	1	0	0	0	0	0	1	0	0	0	0	0	0	0	0	0	0	0	0	0	0	0	0	0
nonsynonymous SNV	R280T	0	0	0	0	0	0	0	0	0	0	0	0	0	0	0	0	0	0	0	0	0	0	0	1	1	0	0	0	0	0	1	0	0	0	0	0	0	0	0	0	0	0	0	0	0	0	0	0
nonsynonymous SNV	R280K	0	0	0	0	0	0	0	0	0	0	0	0	0	0	0	0	0	0	0	0	0	0	0	0	1	0	0	0	0	0	1	0	0	0	0	0	0	0	0	0	0	0	0	0	0	0	0	0
synonymous SNV	R280R	0	0	0	1	0	0	0	0	0	0	0	0	0	0	0	0	0	0	0	0	0	0	0	0	0	0	0	0	0	0	0	0	0	0	0	0	0	0	0	0	0	0	0	0	0	0	0	0
nonsynonymous SNV	R280G	0	0	0	0	0	0	0	0	0	0	0	0	0	0	0	0	0	0	0	0	0	0	0	1	1	0	0	0	0	0	1	0	0	0	0	0	0	0	0	0	0	0	0	0	0	0	0	0
frameshift deletion	D281fs	0	0	0	0	0	1	0	0	0	0	0	0	0	0	0	0	0	0	0	0	0	0	0	0	0	0	0	0	0	0	0	0	0	0	0	0	0	0	0	0	0	0	0	0	0	0	0	0
nonsynonymous SNV	D281E	0	0	0	0	0	0	0	0	0	0	0	0	0	0	0	0	0	0	0	0	0	0	0	0	1	0	0	0	0	0	1	0	0	0	0	0	0	0	0	1	0	0	0	0	0	0	0	0
nonsynonymous SNV	D281V	0	0	0	0	0	0	0	0	0	0	0	0	0	0	0	0	0	0	0	0	0	0	0	0	1	0	0	0	0	0	1	0	0	0	0	0	0	0	0	1	0	0	0	0	0	0	0	0
nonsynonymous SNV	D281G	0	0	0	0	0	0	0	0	0	0	0	0	0	0	0	0	0	0	0	0	0	0	0	0	1	0	0	0	0	0	1	0	0	0	0	0	0	0	0	1	0	0	0	0	0	0	0	0
nonsynonymous SNV	D281Y	0	0	0	0	0	0	0	0	0	0	0	0	0	0	0	0	0	0	0	0	0	0	0	1	1	0	0	0	0	0	1	0	0	0	0	0	0	0	0	1	0	0	0	0	0	0	0	0
nonsynonymous SNV	D281H	0	0	0	0	0	0	0	0	0	0	0	0	0	0	0	0	0	0	0	0	0	0	0	0	1	0	0	0	0	0	1	0	0	0	0	0	0	0	0	1	0	0	0	0	0	0	0	0
nonsynonymous SNV	D281N	0	0	0	0	0	0	0	0	0	0	0	0	0	0	0	0	0	0	0	0	0	0	0	0	1	0	0	0	0	0	1	0	0	0	0	0	0	0	0	1	0	0	0	0	0	0	0	0
nonsynonymous SNV	D281G	0	0	0	0	0	0	0	0	0	0	0	0	0	0	0	0	0	0	0	0	0	0	0	0	1	0	0	0	0	0	1	0	0	0	0	0	0	0	0	1	0	0	0	0	0	0	0	0
nonsynonymous SNV	D281Y	0	0	0	0	0	0	0	0	0	0	0	0	0	0	0	0	0	0	0	0	0	0	0	1	1	0	0	0	0	0	1	0	0	0	0	0	0	0	0	1	0	0	0	0	0	0	0	0
frameshift deletion	R282fs	0	0	0	0	0	1	0	0	0	0	0	0	0	0	0	0	0	0	0	0	0	0	0	0	0	0	0	0	0	0	0	0	0	0	0	0	0	0	0	0	0	0	0	0	0	0	0	0
synonymous SNV	R282R	0	0	0	1	0	0	0	0	0	0	0	0	0	0	0	0	0	0	0	0	0	0	0	0	0	0	0	0	0	0	0	0	0	0	0	0	0	0	0	0	0	0	0	0	0	0	0	0
nonsynonymous SNV	R282Q	0	0	0	0	0	0	0	0	0	0	0	0	0	0	0	0	0	0	0	0	0	0	0	0	1	0	0	0	0	0	1	0	1	0	0	0	0	0	0	0	0	0	0	0	0	0	0	0
nonsynonymous SNV	R282W	0	0	0	0	0	0	0	0	0	0	0	0	0	0	0	0	1	0	0	0	0	0	0	0	1	0	0	0	0	0	1	0	1	0	0	0	0	0	0	0	0	0	0	0	0	0	0	0
nonsynonymous SNV	R282G	0	0	0	0	0	0	0	0	0	0	0	0	0	0	0	0	0	0	0	0	0	0	0	1	1	0	0	0	0	0	1	0	1	0	0	0	0	0	0	0	0	0	0	0	0	0	0	0
nonsynonymous SNV	R282Q	0	0	0	0	0	0	0	0	0	0	0	0	0	0	0	0	0	0	0	0	0	0	0	0	1	0	0	0	0	0	1	0	1	0	0	0	0	0	0	0	0	0	0	0	0	0	0	0
nonsynonymous SNV	R282W	0	0	0	0	0	0	0	0	0	0	0	0	0	0	0	0	1	0	0	0	0	0	0	0	1	0	0	0	0	0	1	0	1	0	0	0	0	0	0	0	0	0	0	0	0	0	0	0
nonsynonymous SNV	R282G	0	0	0	0	0	0	0	0	0	0	0	0	0	0	0	0	0	0	0	0	0	0	0	1	1	0	0	0	0	0	1	0	1	0	0	0	0	0	0	0	0	0	0	0	0	0	0	0
nonframeshift deletion	283del	0	0	0	0	0	0	0	0	0	0	0	0	0	0	0	0	0	0	0	0	0	0	0	0	0	0	0	0	0	0	0	0	0	0	0	0	0	0	0	0	0	0	0	0	0	0	0	0
nonsynonymous SNV	R283P	0	0	0	0	0	0	0	0	0	0	0	0	0	0	0	0	0	0	0	0	0	0	0	1	1	0	0	0	0	0	1	0	0	0	0	0	0	0	0	0	0	0	0	0	0	0	0	1
nonsynonymous SNV	R283H	0	0	0	0	0	0	0	0	0	0	0	0	0	0	0	0	0	0	0	0	0	0	0	0	1	0	0	0	0	0	1	0	0	0	0	0	0	0	0	0	0	0	0	0	0	0	0	1
nonsynonymous SNV	R283P	0	0	0	0	0	0	0	0	0	0	0	0	0	0	0	0	0	0	0	0	0	0	0	1	1	0	0	0	0	0	1	0	0	0	0	0	0	0	0	0	0	0	0	0	0	0	0	1
nonframeshift deletion	283del	0	0	0	0	0	0	0	0	0	0	0	0	0	0	0	0	0	0	0	0	0	0	0	0	0	0	0	0	0	0	0	0	0	0	0	0	0	0	0	0	0	0	0	0	0	0	0	0
nonsynonymous SNV	R283C	0	0	0	0	0	0	0	0	0	0	0	0	0	0	0	0	0	0	0	0	0	0	0	0	1	0	0	0	0	0	1	0	0	0	0	0	0	0	0	0	0	0	0	0	0	0	0	1
frameshift deletion	T284fs	0	0	0	0	0	1	0	0	0	0	0	0	0	0	0	0	0	0	0	0	0	0	0	0	0	0	0	0	0	0	0	0	0	0	0	0	0	0	0	0	0	0	0	0	0	0	0	0
nonsynonymous SNV	T284P	0	0	0	0	0	0	0	0	0	0	0	0	0	0	0	0	0	0	0	0	0	0	0	0	1	0	0	0	0	0	1	0	0	0	0	0	0	0	0	0	0	0	0	0	0	0	0	0
frameshift deletion	T284fs	0	0	0	0	0	1	0	0	0	0	0	0	0	0	0	0	0	0	0	0	0	0	0	0	0	0	0	0	0	0	0	0	0	0	0	0	0	0	0	0	0	0	0	0	0	0	0	0
frameshift deletion	E285fs	0	0	0	0	0	1	0	0	0	0	0	0	0	0	0	0	0	0	0	0	0	0	0	0	0	0	0	0	0	0	0	0	0	0	0	0	0	0	0	0	0	0	0	0	0	0	0	0
nonsynonymous SNV	E285V	0	0	0	0	0	0	0	0	0	0	0	0	0	0	0	0	0	0	0	0	0	0	0	1	1	0	0	0	0	0	1	0	0	0	0	0	0	0	0	0	0	0	0	1	0	0	0	0
stopgain	E285X	1	0	0	0	0	0	0	0	0	0	0	0	0	0	0	0	0	0	0	0	0	0	0	0	0	0	0	0	0	0	0	0	0	0	0	0	0	0	0	0	0	0	0	0	0	0	0	0
nonsynonymous SNV	E285K	0	0	0	0	0	0	0	0	0	0	0	0	0	0	0	0	0	0	0	0	0	0	0	0	1	0	0	0	0	0	1	0	0	0	0	0	0	0	0	0	0	0	0	1	0	0	0	0
nonsynonymous SNV	E285V	0	0	0	0	0	0	0	0	0	0	0	0	0	0	0	0	0	0	0	0	0	0	0	1	1	0	0	0	0	0	1	0	0	0	0	0	0	0	0	0	0	0	0	1	0	0	0	0
nonsynonymous SNV	E285K	0	0	0	0	0	0	0	0	0	0	0	0	0	0	0	0	0	0	0	0	0	0	0	0	1	0	0	0	0	0	1	0	0	0	0	0	0	0	0	0	0	0	0	1	0	0	0	0
nonsynonymous SNV	E286V	0	0	0	0	0	0	0	0	0	0	0	0	0	0	0	0	0	0	0	0	0	0	0	0	1	0	0	0	0	0	1	0	0	0	0	0	0	0	0	0	0	0	0	0	0	0	0	0
nonsynonymous SNV	E286G	0	0	0	0	0	0	0	0	0	0	0	0	0	0	0	0	0	0	0	0	0	0	0	0	1	0	0	0	0	0	1	0	0	0	0	0	0	0	0	0	0	0	0	0	0	0	0	0
nonsynonymous SNV	E286A	0	0	0	0	0	0	0	0	0	0	0	0	0	0	0	0	0	0	0	0	0	0	0	0	1	0	0	0	0	0	1	0	0	0	0	0	0	0	0	0	0	0	0	0	0	0	0	0
stopgain	E286X	1	0	0	0	0	0	0	0	0	0	0	0	0	0	0	0	0	0	0	0	0	0	0	0	0	0	0	0	0	0	0	0	0	0	0	0	0	0	0	0	0	0	0	0	0	0	0	0
nonsynonymous SNV	E286Q	0	0	0	0	0	0	0	0	0	0	0	0	0	0	0	0	0	0	0	0	0	0	0	0	1	0	0	0	0	0	1	0	0	0	0	0	0	0	0	0	0	0	0	0	0	0	0	0
nonsynonymous SNV	E286K	0	0	0	0	0	0	0	0	0	0	0	0	0	0	0	0	0	0	0	0	0	0	0	1	1	0	0	0	0	0	1	0	0	0	0	0	0	0	0	0	0	0	0	0	0	0	0	0
nonsynonymous SNV	E286K	0	0	0	0	0	0	0	0	0	0	0	0	0	0	0	0	0	0	0	0	0	0	0	1	1	0	0	0	0	0	1	0	0	0	0	0	0	0	0	0	0	0	0	0	0	0	0	0
frameshift deletion	E287fs	0	0	0	0	0	1	0	0	0	0	0	0	0	0	0	0	0	0	0	0	0	0	0	0	0	0	0	0	0	0	0	0	0	0	0	0	0	0	0	0	0	0	0	0	0	0	0	0
nonsynonymous SNV	E287D	0	0	0	0	0	0	0	0	0	0	0	0	0	0	0	0	0	0	0	0	0	0	0	0	1	0	0	0	0	0	1	0	0	0	0	0	0	0	0	0	0	0	0	0	0	0	0	0
synonymous SNV	E287E	0	0	0	1	0	0	0	0	0	0	0	0	0	0	0	0	0	0	0	0	0	0	0	0	0	0	0	0	0	0	0	0	0	0	0	0	0	0	0	0	0	0	0	0	0	0	0	0
stopgain	E287X	1	0	0	0	0	0	0	0	0	0	0	0	0	0	0	0	0	0	0	0	0	0	0	0	0	0	0	0	0	0	0	0	0	0	0	0	0	0	0	0	0	0	0	0	0	0	0	0
nonframeshift deletion	287del	0	0	0	0	0	0	0	0	0	0	0	0	0	0	0	0	0	0	0	0	0	0	0	0	0	0	0	0	0	0	0	0	0	0	0	0	0	0	0	0	0	0	0	0	0	0	0	0
frameshift insertion	N288fs	0	0	0	0	0	1	0	0	0	0	0	0	0	0	0	0	0	0	0	0	0	0	0	0	0	0	0	0	0	0	0	0	0	0	0	0	0	0	0	0	0	0	0	0	0	0	0	0
frameshift deletion	L289fs	0	0	0	0	0	1	0	0	0	0	0	0	0	0	0	0	0	0	0	0	0	0	0	0	0	0	0	0	0	0	0	0	0	0	0	0	0	0	0	0	0	0	0	0	0	0	0	0
nonsynonymous SNV	L289F	0	0	0	0	0	0	0	0	0	0	0	0	0	0	0	0	0	0	0	0	0	0	0	0	0	0	0	0	0	0	0	0	0	0	0	0	0	0	0	0	0	0	0	0	0	0	0	0
nonsynonymous SNV	R290C	0	0	0	0	0	0	0	0	0	0	0	0	0	0	0	0	0	0	0	0	0	0	0	0	0	0	0	0	0	0	0	0	0	0	0	0	0	0	0	0	0	0	0	0	0	0	0	0
synonymous SNV	K291K	0	0	0	1	0	0	0	0	0	0	0	0	0	0	0	0	0	0	0	0	0	0	0	0	0	0	0	0	0	0	0	0	0	0	0	0	0	0	0	0	0	0	0	0	0	0	0	0
stopgain	K291X	1	0	0	0	0	0	0	0	0	0	0	0	0	0	0	0	0	0	0	0	0	0	0	0	0	0	0	0	0	0	0	0	0	0	0	0	0	0	0	0	0	0	0	0	0	0	0	0
frameshift deletion	K292fs	0	0	0	0	0	1	0	0	0	0	0	0	0	0	0	0	0	0	0	0	0	0	0	0	0	0	0	0	0	0	0	0	0	0	0	0	0	0	0	0	0	0	0	0	0	0	0	0
stopgain	K292X	1	0	0	0	0	0	0	0	0	0	0	0	0	0	0	0	0	0	0	0	0	0	0	0	0	0	0	0	0	0	0	0	0	0	0	0	0	0	0	0	0	0	0	0	0	0	0	0
synonymous SNV	G293G	0	0	0	1	0	0	0	0	0	0	0	0	0	0	0	0	0	0	0	0	0	0	0	0	0	0	0	0	0	0	0	0	0	0	0	0	0	0	0	0	0	0	0	0	0	0	0	0
frameshift insertion	G293fs	0	0	0	0	0	1	0	0	0	0	0	0	0	0	0	0	0	0	0	0	0	0	0	0	0	0	0	0	0	0	0	0	0	0	0	0	0	0	0	0	0	0	0	0	0	0	0	0
frameshift deletion	E294fs	0	0	0	0	0	1	0	0	0	0	0	0	0	0	0	0	0	0	0	0	0	0	0	0	0	0	0	0	0	0	0	0	0	0	0	0	0	0	0	0	0	0	0	0	0	0	0	0
stopgain	E294X	1	0	0	0	0	0	0	0	0	0	0	0	0	0	0	0	0	0	0	0	0	0	0	0	0	0	0	0	0	0	0	0	0	0	0	0	0	0	0	0	0	0	0	0	0	0	0	0
stopgain	E294X	1	0	0	0	0	0	0	0	0	0	0	0	0	0	0	0	0	0	0	0	0	0	0	0	0	0	0	0	0	0	0	0	0	0	0	0	0	0	0	0	0	0	0	0	0	0	0	0
frameshift deletion	E294fs	0	0	0	0	0	1	0	0	0	0	0	0	0	0	0	0	0	0	0	0	0	0	0	0	0	0	0	0	0	0	0	0	0	0	0	0	0	0	0	0	0	0	0	0	0	0	0	0
nonsynonymous SNV	E294K	0	0	0	0	0	0	0	0	0	0	0	0	0	0	0	0	0	0	0	0	0	0	0	0	0	0	0	0	0	0	0	0	0	0	0	0	0	0	0	0	0	0	0	0	0	0	0	0
stopgain	E298X	1	0	0	0	0	0	0	0	0	0	0	0	0	0	0	0	0	0	0	0	0	0	0	0	0	0	0	0	0	0	0	0	0	0	0	0	0	0	0	0	0	0	0	0	0	0	0	0
stopgain	E298X	1	0	0	0	0	0	0	0	0	0	0	0	0	0	0	0	0	0	0	0	0	0	0	0	0	0	0	0	0	0	0	0	0	0	0	0	0	0	0	0	0	0	0	0	0	0	0	0
frameshift insertion	P301fs	0	0	0	0	0	1	0	0	0	0	0	0	0	0	0	0	0	0	0	0	0	0	0	0	0	0	0	0	0	0	0	0	0	0	0	0	0	0	0	0	0	0	0	0	0	0	0	0
frameshift deletion	P301fs	0	0	0	0	0	1	0	0	0	0	0	0	0	0	0	0	0	0	0	0	0	0	0	0	0	0	0	0	0	0	0	0	0	0	0	0	0	0	0	0	0	0	0	0	0	0	0	0
frameshift deletion	G302fs	0	0	0	0	0	1	0	0	0	0	0	0	0	0	0	0	0	0	0	0	0	0	0	0	0	0	0	0	0	0	0	0	0	0	0	0	0	0	0	0	0	0	0	0	0	0	0	0
frameshift deletion	S303fs	0	0	0	0	0	1	0	0	0	0	0	0	0	0	0	0	0	0	0	0	0	0	0	0	0	0	0	0	0	0	0	0	0	0	0	0	0	0	0	0	0	0	0	0	0	0	0	0
frameshift deletion	T304fs	0	0	0	0	0	1	0	0	0	0	0	0	0	0	0	0	0	0	0	0	0	0	0	0	0	0	0	0	0	0	0	0	0	0	0	0	0	0	0	0	0	0	0	0	0	0	0	0
frameshift insertion	T304fs	0	0	0	0	0	1	0	0	0	0	0	0	0	0	0	0	0	0	0	0	0	0	0	0	0	0	0	0	0	0	0	0	0	0	0	0	0	0	0	0	0	0	0	0	0	0	0	0
stopgain	K305X	1	0	0	0	0	0	0	0	0	0	0	0	0	0	0	0	0	0	0	0	0	0	0	0	0	0	0	0	0	0	0	0	0	0	0	0	0	0	0	0	0	0	0	0	0	0	0	0
frameshift deletion	R306fs	0	0	0	0	0	1	0	0	0	0	0	0	0	0	0	0	0	0	0	0	0	0	0	0	0	0	0	0	0	0	0	0	0	0	0	0	0	0	0	0	0	0	0	0	0	0	0	0
stopgain	R306X	1	0	0	0	0	0	0	0	0	0	0	0	0	0	0	0	0	0	0	0	0	0	0	0	0	0	0	0	0	0	0	0	0	0	0	0	0	0	0	0	0	0	0	0	0	0	0	0
stopgain	R306X	1	0	0	0	0	0	0	0	0	0	0	0	0	0	0	0	0	0	0	0	0	0	0	0	0	0	0	0	0	0	0	0	0	0	0	0	0	0	0	0	0	0	0	0	0	0	0	0
frameshift deletion	A307fs	0	0	0	0	0	1	0	0	0	0	0	0	0	0	0	0	0	0	0	0	0	0	0	0	0	0	0	0	0	0	0	0	0	0	0	0	0	0	0	0	0	0	0	0	0	0	0	0
frameshift deletion	A307fs	0	0	0	0	0	1	0	0	0	0	0	0	0	0	0	0	0	0	0	0	0	0	0	0	0	0	0	0	0	0	0	0	0	0	0	0	0	0	0	0	0	0	0	0	0	0	0	0
nonsynonymous SNV	A307V	0	0	0	0	0	0	0	0	0	0	0	0	0	0	0	0	0	0	0	0	0	0	0	0	0	0	0	0	0	0	0	0	0	0	0	0	0	0	0	0	0	0	0	0	0	0	0	0
nonframeshift deletion	307del	0	0	0	0	0	0	0	0	0	0	0	0	0	0	0	0	0	0	0	0	0	0	0	0	0	0	0	0	0	0	0	0	0	0	0	0	0	0	0	0	0	0	0	0	0	0	0	0
stopgain	A307X	1	0	0	0	0	0	0	0	0	0	0	0	0	0	0	0	0	0	0	0	0	0	0	0	0	0	0	0	0	0	0	0	0	0	0	0	0	0	0	0	0	0	0	0	0	0	0	0
nonsynonymous SNV	P309S	0	0	0	0	0	0	0	0	0	0	0	0	0	0	0	0	0	0	0	0	0	0	0	0	0	0	0	0	0	0	0	0	0	0	0	0	0	0	0	0	0	0	0	0	0	0	0	0
frameshift insertion	N310fs	0	0	0	0	0	1	0	0	0	0	0	0	0	0	0	0	0	0	0	0	0	0	0	0	0	0	0	0	0	0	0	0	0	0	0	0	0	0	0	0	0	0	0	0	0	0	0	0
frameshift deletion	S314fs	0	0	0	0	0	1	0	0	0	0	0	0	0	0	0	0	0	0	0	0	0	0	0	0	0	0	0	0	0	0	0	0	0	0	0	0	0	0	0	0	0	0	0	0	0	0	0	0
frameshift deletion	S314fs	0	0	0	0	0	1	0	0	0	0	0	0	0	0	0	0	0	0	0	0	0	0	0	0	0	0	0	0	0	0	0	0	0	0	0	0	0	0	0	0	0	0	0	0	0	0	0	0
frameshift deletion	S315fs	0	0	0	0	0	1	0	0	0	0	0	0	0	0	0	0	0	0	0	0	0	0	0	0	0	0	0	0	0	0	0	0	0	0	0	0	0	0	0	0	0	0	0	0	0	0	0	0
synonymous SNV	P316P	0	0	0	1	0	0	0	0	0	0	0	0	0	0	0	0	0	0	0	0	0	0	0	0	0	0	0	0	0	0	0	0	0	0	0	0	0	0	0	0	0	0	0	0	0	0	0	0
frameshift deletion	Q317fs	0	0	0	0	0	1	0	0	0	0	0	0	0	0	0	0	0	0	0	0	0	0	0	0	0	0	0	0	0	0	0	0	0	0	0	0	0	0	0	0	0	0	0	0	0	0	0	0
stopgain	Q317X	1	0	0	0	0	0	0	0	0	0	0	0	0	0	0	0	0	0	0	0	0	0	0	0	0	0	0	0	0	0	0	0	0	0	0	0	0	0	0	0	0	0	0	0	0	0	0	0
stopgain	Q317X	1	0	0	0	0	0	0	0	0	0	0	0	0	0	0	0	0	0	0	0	0	0	0	0	0	0	0	0	0	0	0	0	0	0	0	0	0	0	0	0	0	0	0	0	0	0	0	0
frameshift deletion	P318fs	0	0	0	0	0	1	0	0	0	0	0	0	0	0	0	0	0	0	0	0	0	0	0	0	0	0	0	0	0	0	0	0	0	0	0	0	0	0	0	0	0	0	0	0	0	0	0	0
nonsynonymous SNV	K319N	0	0	0	0	0	0	0	0	0	0	0	0	0	0	0	0	0	0	0	0	0	0	0	0	0	0	0	0	0	0	0	0	0	0	0	0	0	0	0	0	0	0	0	0	0	0	0	0
frameshift deletion	K319fs	0	0	0	0	0	1	0	0	0	0	0	0	0	0	0	0	0	0	0	0	0	0	0	0	0	0	0	0	0	0	0	0	0	0	0	0	0	0	0	0	0	0	0	0	0	0	0	0
stopgain	K319X	1	0	0	0	0	0	0	0	0	0	0	0	0	0	0	0	0	0	0	0	0	0	0	0	0	0	0	0	0	0	0	0	0	0	0	0	0	0	0	0	0	0	0	0	0	0	0	0
frameshift deletion	K320fs	0	0	0	0	0	1	0	0	0	0	0	0	0	0	0	0	0	0	0	0	0	0	0	0	0	0	0	0	0	0	0	0	0	0	0	0	0	0	0	0	0	0	0	0	0	0	0	0
frameshift insertion	K320fs	0	0	0	0	0	1	0	0	0	0	0	0	0	0	0	0	0	0	0	0	0	0	0	0	0	0	0	0	0	0	0	0	0	0	0	0	0	0	0	0	0	0	0	0	0	0	0	0
synonymous SNV	K320K	0	0	0	1	0	0	0	0	0	0	0	0	0	0	0	0	0	0	0	0	0	0	0	0	0	0	0	0	0	0	0	0	0	0	0	0	0	0	0	0	0	0	0	0	0	0	0	0
nonsynonymous SNV	K320N	0	0	0	0	0	0	0	0	0	0	0	0	0	0	0	0	0	0	0	0	0	0	0	0	0	0	0	0	0	0	0	0	0	0	0	0	0	0	0	0	0	0	0	0	0	0	0	0
stopgain	K321X	1	0	0	0	0	0	0	0	0	0	0	0	0	0	0	0	0	0	0	0	0	0	0	0	0	0	0	0	0	0	0	0	0	0	0	0	0	0	0	0	0	0	0	0	0	0	0	0
frameshift deletion	P322fs	0	0	0	0	0	1	0	0	0	0	0	0	0	0	0	0	0	0	0	0	0	0	0	0	0	0	0	0	0	0	0	0	0	0	0	0	0	0	0	0	0	0	0	0	0	0	0	0
frameshift deletion	D324fs	0	0	0	0	0	1	0	0	0	0	0	0	0	0	0	0	0	0	0	0	0	0	0	0	0	0	0	0	0	0	0	0	0	0	0	0	0	0	0	0	0	0	0	0	0	0	0	0
nonframeshift deletion	326del	0	0	0	0	0	0	0	0	0	0	0	0	0	0	0	0	0	0	0	0	0	0	0	0	0	0	0	0	0	0	0	0	0	0	0	0	0	0	0	0	0	0	0	0	0	0	0	0
stopgain	E326X	1	0	0	0	0	0	0	0	0	0	0	0	0	0	0	0	0	0	0	0	0	0	0	0	0	0	0	0	0	0	0	0	0	0	0	0	0	0	0	0	0	0	0	0	0	0	0	0
stopgain	Y327X	1	0	0	0	0	0	0	0	0	0	0	0	0	0	0	0	0	0	0	0	0	0	0	0	0	0	0	0	0	0	0	0	0	0	0	0	0	0	0	0	0	0	0	0	0	0	0	0
frameshift deletion	Y327fs	0	0	0	0	0	1	0	0	0	0	0	0	0	0	0	0	0	0	0	0	0	0	0	0	0	0	0	0	0	0	0	0	0	0	0	0	0	0	0	0	0	0	0	0	0	0	0	0
frameshift deletion	F328fs	0	0	0	0	0	1	0	0	0	0	0	0	0	0	0	0	0	0	0	0	0	0	0	0	0	0	0	0	0	0	0	0	0	0	0	0	0	0	0	0	0	0	0	0	0	0	0	0
nonsynonymous SNV	L330R	0	0	0	0	0	0	0	0	0	0	0	0	0	0	0	0	0	0	0	0	0	0	0	0	0	0	0	0	0	0	0	0	0	0	0	0	0	0	0	0	0	0	0	0	0	0	0	0
frameshift deletion	L330fs	0	0	0	0	0	1	0	0	0	0	0	0	0	0	0	0	0	0	0	0	0	0	0	0	0	0	0	0	0	0	0	0	0	0	0	0	0	0	0	0	0	0	0	0	0	0	0	0
nonsynonymous SNV	Q331H	0	0	0	0	0	0	0	0	0	0	0	0	0	0	0	0	0	0	0	0	0	0	0	0	0	0	0	0	0	0	0	0	0	0	0	0	0	0	0	0	0	0	0	0	0	0	0	0
stopgain	Q331X	1	0	0	0	0	0	0	0	0	0	0	0	0	0	0	0	0	0	0	0	0	0	0	0	0	0	0	0	0	0	0	0	0	0	0	0	0	0	0	0	0	0	0	0	0	0	0	0
nonsynonymous SNV	Q331R	0	0	0	0	0	0	0	0	0	0	0	0	0	0	0	0	0	0	0	0	0	0	0	0	0	0	0	0	0	0	0	0	0	0	0	0	0	0	0	0	0	0	0	0	0	0	0	0
stopgain	Q331X	1	0	0	0	0	0	0	0	0	0	0	0	0	0	0	0	0	0	0	0	0	0	0	0	0	0	0	0	0	0	0	0	0	0	0	0	0	0	0	0	0	0	0	0	0	0	0	0
frameshift deletion	R333fs	0	0	0	0	0	1	0	0	0	0	0	0	0	0	0	0	0	0	0	0	0	0	0	0	0	0	0	0	0	0	0	0	0	0	0	0	0	0	0	0	0	0	0	0	0	0	0	0
frameshift deletion	G334fs	0	0	0	0	0	1	0	0	0	0	0	0	0	0	0	0	0	0	0	0	0	0	0	0	0	0	0	0	0	0	0	0	0	0	0	0	0	0	0	0	0	0	0	0	0	0	0	0
nonsynonymous SNV	G334V	0	0	0	0	0	0	0	0	0	0	0	0	0	0	0	0	0	0	0	0	0	0	0	0	0	0	0	0	0	0	0	0	0	0	0	0	0	0	0	0	0	0	0	0	0	0	0	0
frameshift deletion	R335fs	0	0	0	0	0	1	0	0	0	0	0	0	0	0	0	0	0	0	0	0	0	0	0	0	0	0	0	0	0	0	0	0	0	0	0	0	0	0	0	0	0	0	0	0	0	0	0	0
stopgain	E336X	1	0	0	0	0	0	0	0	0	0	0	0	0	0	0	0	0	0	0	0	0	0	0	0	0	0	0	0	0	0	0	0	0	0	0	0	0	0	0	0	0	0	0	0	0	0	0	0
frameshift deletion	E336fs	0	0	0	0	0	1	0	0	0	0	0	0	0	0	0	0	0	0	0	0	0	0	0	0	0	0	0	0	0	0	0	0	0	0	0	0	0	0	0	0	0	0	0	0	0	0	0	0
stopgain	E336X	1	0	0	0	0	0	0	0	0	0	0	0	0	0	0	0	0	0	0	0	0	0	0	0	0	0	0	0	0	0	0	0	0	0	0	0	0	0	0	0	0	0	0	0	0	0	0	0
nonsynonymous SNV	R337L	0	0	0	0	0	0	0	0	0	0	0	0	0	0	0	0	0	0	0	0	0	0	0	0	0	0	0	0	0	0	0	0	0	0	0	0	0	0	0	0	0	0	0	0	0	0	1	0
nonsynonymous SNV	R337H	0	0	0	0	0	0	0	0	0	0	0	0	0	0	0	0	0	0	0	0	0	0	0	0	0	0	0	0	0	0	0	0	0	0	0	0	0	0	0	0	0	0	0	0	0	0	1	0
frameshift deletion	R337fs	0	0	0	0	0	1	0	0	0	0	0	0	0	0	0	0	0	0	0	0	0	0	0	0	0	0	0	0	0	0	0	0	0	0	0	0	0	0	0	0	0	0	0	0	0	0	0	0
nonsynonymous SNV	R337C	0	0	0	0	0	0	0	0	0	0	0	0	0	0	0	0	0	0	0	0	0	0	0	0	0	0	0	0	0	0	0	0	0	0	0	0	0	0	0	0	0	0	0	0	0	0	1	0
nonsynonymous SNV	R337L	0	0	0	0	0	0	0	0	0	0	0	0	0	0	0	0	0	0	0	0	0	0	0	0	0	0	0	0	0	0	0	0	0	0	0	0	0	0	0	0	0	0	0	0	0	0	1	0
nonsynonymous SNV	R337C	0	0	0	0	0	0	0	0	0	0	0	0	0	0	0	0	0	0	0	0	0	0	0	0	0	0	0	0	0	0	0	0	0	0	0	0	0	0	0	0	0	0	0	0	0	0	1	0
stopgain	R337X	1	0	0	0	0	0	0	0	0	0	0	0	0	0	0	0	0	0	0	0	0	0	0	0	0	0	0	0	0	0	0	0	0	0	0	0	0	0	0	0	0	0	0	0	0	0	0	0
nonsynonymous SNV	F338I	0	0	0	0	0	0	0	0	0	0	0	0	0	0	0	0	0	0	0	0	0	0	0	0	0	0	0	0	0	0	0	0	0	0	0	0	0	0	0	0	0	0	0	0	0	0	0	0
frameshift deletion	E339fs	0	0	0	0	0	1	0	0	0	0	0	0	0	0	0	0	0	0	0	0	0	0	0	0	0	0	0	0	0	0	0	0	0	0	0	0	0	0	0	0	0	0	0	0	0	0	0	0
stopgain	E339X	1	0	0	0	0	0	0	0	0	0	0	0	0	0	0	0	0	0	0	0	0	0	0	0	0	0	0	0	0	0	0	0	0	0	0	0	0	0	0	0	0	0	0	0	0	0	0	0
stopgain	E339X	1	0	0	0	0	0	0	0	0	0	0	0	0	0	0	0	0	0	0	0	0	0	0	0	0	0	0	0	0	0	0	0	0	0	0	0	0	0	0	0	0	0	0	0	0	0	0	0
nonsynonymous SNV	F341S	0	0	0	0	0	0	0	0	0	0	0	0	0	0	0	0	0	0	0	0	0	0	0	0	0	0	0	0	0	0	0	0	0	0	0	0	0	0	0	0	0	0	0	0	0	0	0	0
synonymous SNV	F341F	0	0	0	1	0	0	0	0	0	0	0	0	0	0	0	0	0	0	0	0	0	0	0	0	0	0	0	0	0	0	0	0	0	0	0	0	0	0	0	0	0	0	0	0	0	0	0	0
nonsynonymous SNV	F341C	0	0	0	0	0	0	0	0	0	0	0	0	0	0	0	0	0	0	0	0	0	0	0	0	0	0	0	0	0	0	0	0	0	0	0	0	0	0	0	0	0	0	0	0	0	0	0	0
frameshift deletion	R342fs	0	0	0	0	0	1	0	0	0	0	0	0	0	0	0	0	0	0	0	0	0	0	0	0	0	0	0	0	0	0	0	0	0	0	0	0	0	0	0	0	0	0	0	0	0	0	0	0
nonsynonymous SNV	R342P	0	0	0	0	0	0	0	0	0	0	0	0	0	0	0	0	0	0	0	0	0	0	0	0	0	0	0	0	0	0	0	0	0	0	0	0	0	0	0	0	0	0	0	0	0	0	0	0
stopgain	R342X	1	0	0	0	0	0	0	0	0	0	0	0	0	0	0	0	0	0	0	0	0	0	0	0	0	0	0	0	0	0	0	0	0	0	0	0	0	0	0	0	0	0	0	0	0	0	0	0
stopgain	R342X	1	0	0	0	0	0	0	0	0	0	0	0	0	0	0	0	0	0	0	0	0	0	0	0	0	0	0	0	0	0	0	0	0	0	0	0	0	0	0	0	0	0	0	0	0	0	0	0
frameshift deletion	R342fs	0	0	0	0	0	1	0	0	0	0	0	0	0	0	0	0	0	0	0	0	0	0	0	0	0	0	0	0	0	0	0	0	0	0	0	0	0	0	0	0	0	0	0	0	0	0	0	0
frameshift deletion	E343fs	0	0	0	0	0	1	0	0	0	0	0	0	0	0	0	0	0	0	0	0	0	0	0	0	0	0	0	0	0	0	0	0	0	0	0	0	0	0	0	0	0	0	0	0	0	0	0	0
stopgain	E343X	1	0	0	0	0	0	0	0	0	0	0	0	0	0	0	0	0	0	0	0	0	0	0	0	0	0	0	0	0	0	0	0	0	0	0	0	0	0	0	0	0	0	0	0	0	0	0	0
frameshift deletion	L344fs	0	0	0	0	0	1	0	0	0	0	0	0	0	0	0	0	0	0	0	0	0	0	0	0	0	0	0	0	0	0	0	0	0	0	0	0	0	0	0	0	0	0	0	0	0	0	0	0
nonsynonymous SNV	N345D	0	0	0	0	0	0	0	0	0	0	0	0	0	0	0	0	0	0	0	0	0	0	0	0	0	0	0	0	0	0	0	0	0	0	0	0	0	0	0	0	0	0	0	0	0	0	0	0
frameshift deletion	N345fs	0	0	0	0	0	1	0	0	0	0	0	0	0	0	0	0	0	0	0	0	0	0	0	0	0	0	0	0	0	0	0	0	0	0	0	0	0	0	0	0	0	0	0	0	0	0	0	0
stopgain	E346X	1	0	0	0	0	0	0	0	0	0	0	0	0	0	0	0	0	0	0	0	0	0	0	0	0	0	0	0	0	0	0	0	0	0	0	0	0	0	0	0	0	0	0	0	0	0	0	0
stopgain	A347X	1	0	0	0	0	0	0	0	0	0	0	0	0	0	0	0	0	0	0	0	0	0	0	0	0	0	0	0	0	0	0	0	0	0	0	0	0	0	0	0	0	0	0	0	0	0	0	0
nonsynonymous SNV	A347P	0	0	0	0	0	0	0	0	0	0	0	0	0	0	0	0	0	0	0	0	0	0	0	0	0	0	0	0	0	0	0	0	0	0	0	0	0	0	0	0	0	0	0	0	0	0	0	0
nonsynonymous SNV	L348F	0	0	0	0	0	0	0	0	0	0	0	0	0	0	0	0	0	0	0	0	0	0	0	0	0	0	0	0	0	0	0	0	0	0	0	0	0	0	0	0	0	0	0	0	0	0	0	0
stopgain	E349X	1	0	0	0	0	0	0	0	0	0	0	0	0	0	0	0	0	0	0	0	0	0	0	0	0	0	0	0	0	0	0	0	0	0	0	0	0	0	0	0	0	0	0	0	0	0	0	0
stopgain	E349X	1	0	0	0	0	0	0	0	0	0	0	0	0	0	0	0	0	0	0	0	0	0	0	0	0	0	0	0	0	0	0	0	0	0	0	0	0	0	0	0	0	0	0	0	0	0	0	0
synonymous SNV	L350L	0	0	0	1	0	0	0	0	0	0	0	0	0	0	0	0	0	0	0	0	0	0	0	0	0	0	0	0	0	0	0	0	0	0	0	0	0	0	0	0	0	0	0	0	0	0	0	0
nonsynonymous SNV	K351N	0	0	0	0	0	0	0	0	0	0	0	0	0	0	0	0	0	0	0	0	0	0	0	0	0	0	0	0	0	0	0	0	0	0	0	0	0	0	0	0	0	0	0	0	0	0	0	0
stopgain	Q354X	1	0	0	0	0	0	0	0	0	0	0	0	0	0	0	0	0	0	0	0	0	0	0	0	0	0	0	0	0	0	0	0	0	0	0	0	0	0	0	0	0	0	0	0	0	0	0	0
synonymous SNV	G356G	0	0	0	1	0	0	0	0	0	0	0	0	0	0	0	0	0	0	0	0	0	0	0	0	0	0	0	0	0	0	0	0	0	0	0	0	0	0	0	0	0	0	0	0	0	0	0	0
nonsynonymous SNV	G360V	0	0	0	0	0	0	0	0	0	0	0	0	0	0	0	0	0	0	0	0	0	0	0	0	0	0	0	0	0	0	0	0	0	0	0	0	0	0	0	0	0	0	0	0	0	0	0	0
stopgain	Q375X	1	0	0	0	0	0	0	0	0	0	0	0	0	0	0	0	0	0	0	0	0	0	0	0	0	0	0	0	0	0	0	0	0	0	0	0	0	0	0	0	0	0	0	0	0	0	0	0
nonsynonymous SNV	S376C	0	0	0	0	0	0	0	0	0	0	0	0	0	0	0	0	0	0	0	0	0	0	0	0	0	0	0	0	0	0	0	0	0	0	0	0	0	0	0	0	0	0	0	0	0	0	0	0
frameshift deletion	K382fs	0	0	0	0	0	1	0	0	0	0	0	0	0	0	0	0	0	0	0	0	0	0	0	0	0	0	0	0	0	0	0	0	0	0	0	0	0	0	0	0	0	0	0	0	0	0	0	0
frameshift deletion	K382fs	0	0	0	0	0	1	0	0	0	0	0	0	0	0	0	0	0	0	0	0	0	0	0	0	0	0	0	0	0	0	0	0	0	0	0	0	0	0	0	0	0	0	0	0	0	0	0	0
nonsynonymous SNV	G389W	0	0	0	0	0	0	0	0	0	0	0	0	0	0	0	0	0	0	0	0	0	0	0	0	0	0	0	0	0	0	0	0	0	0	0	0	0	0	0	0	0	0	0	0	0	0	0	0
[truncated: 43 more columns]

## Sheet: table S4B
Table S4B. Full list of ANOVA pan-cancer interactions between TP53 mutation classes and TP53 activity in primary tumors
POS	NEG	POS_Y_MEAN	NEG_Y_MEAN	deltaMEAN_Y	POS_Y_sd	NEG_Y_sd	X_effect_size	POS_Glass_delta	NEG_Glass_delta	X_ANOVA_pval	X_ANOVA_coef	AGE_ANOVA_pval	GENDER_PVAL	Mutation_group
855	3794	-0.160729	0.139714	-0.300443	0.716061	0.733633	-0.41132	0.419577	0.409527	3.13348e-27	-0.301061	0.0916946	0.820121	transcriptional_inactive
913	3794	-0.144983	0.139714	-0.284697	0.712999	0.733633	-0.390167	0.399295	0.388064	5.70195e-26	-0.285463	0.0903322	0.760189	Missense
898	3794	-0.139919	0.139714	-0.279633	0.713962	0.733633	-0.383105	0.391664	0.381162	8.51618e-25	-0.280361	0.076816	0.717326	Dom_DNA
454	3794	-0.160589	0.139714	-0.300302	0.722352	0.733633	-0.410003	0.415728	0.409335	2.25972e-16	-0.299913	0.154124	0.419047	Myers_HNSCC_Binary
230	3794	-0.212104	0.139714	-0.351818	0.687451	0.733633	-0.481229	0.511772	0.479556	1.19449e-12	-0.354617	0.534353	0.415362	Str_A_NDBL_or_beta.sheets
411	3794	-0.123407	0.139714	-0.263121	0.717028	0.733633	-0.35944	0.366961	0.358655	4.43855e-12	-0.264038	0.231717	0.647705	Str_A_L2_or_L3
245	3794	-0.164601	0.139714	-0.304314	0.726517	0.733633	-0.415047	0.418867	0.414804	4.66989e-10	-0.302122	0.27963	0.756431	Dom_DNA_contact
290	3794	-0.138555	0.139714	-0.278268	0.732453	0.733633	-0.379345	0.379913	0.379302	6.02583e-10	-0.277495	0.291952	0.524552	Str_A_L1_or_S_or_H2
165	3794	-0.222879	0.139714	-0.362592	0.710484	0.733633	-0.494879	0.510345	0.494242	8.16218e-10	-0.359593	0.397944	0.473506	StrB_Beta_Strand_S10
251	3794	-0.151716	0.139714	-0.29143	0.748258	0.733633	-0.396748	0.389478	0.397242	1.46338e-09	-0.290406	0.338344	0.474253	Dom_HCD_V.DNA_binding
168	3794	-0.210386	0.139714	-0.350099	0.72191	0.733633	-0.477532	0.484963	0.477213	2.33669e-09	-0.346977	0.408634	0.522853	StrB_Beta_Strand_S1
240	3794	-0.140421	0.139714	-0.280135	0.755659	0.733633	-0.381158	0.370716	0.381846	1.28778e-08	-0.278969	0.330718	0.507434	StrB_Helix_H2
157	3794	-0.188991	0.139714	-0.328704	0.754782	0.733633	-0.447533	0.435496	0.44805	3.90383e-08	-0.329411	0.438532	0.438621	StrB_Loop_L2
186	3794	-0.152125	0.139714	-0.291838	0.71998	0.733633	-0.39814	0.405342	0.397799	1.0548e-07	-0.293405	0.582833	0.461122	Nonsense
209	3794	-0.139178	0.139714	-0.278892	0.725616	0.733633	-0.380366	0.384352	0.380151	1.26264e-07	-0.276146	0.298154	0.586175	HS_Contact_248_or_273
159	3794	-0.16114	0.139714	-0.300854	0.712526	0.733633	-0.410553	0.422235	0.410087	3.56692e-07	-0.302759	0.601142	0.471347	Indel_Frameshift
238	3794	-0.0997569	0.139714	-0.23947	0.713588	0.733633	-0.326936	0.335587	0.326417	9.32961e-07	-0.240649	0.32896	0.657229	Dom_HCD_IV.DNA_binding
223	3794	-0.106218	0.139714	-0.245932	0.705402	0.733633	-0.335926	0.348641	0.335224	1.05159e-06	-0.246785	0.353136	0.726702	StrB_Loop_L3
125	3794	-0.186747	0.139714	-0.32646	0.743403	0.733633	-0.444802	0.439143	0.444991	1.57857e-06	-0.321698	0.38989	0.482968	pos 273
155	3794	-0.137104	0.139714	-0.276818	0.676683	0.733633	-0.378428	0.40908	0.377325	2.74632e-06	-0.282255	0.384914	0.408685	Splice_site
71	3794	-0.274211	0.139714	-0.413925	0.782716	0.733633	-0.563507	0.528832	0.564212	4.33802e-06	-0.406584	0.451297	0.427625	R273C
80	3794	-0.174928	0.139714	-0.314641	0.743429	0.733633	-0.428763	0.423229	0.428881	0.000123364	-0.31936	0.552517	0.493129	StrB_Beta_Strand_S4
7	3794	-0.893753	0.139714	-1.03347	0.355948	0.733633	-1.40955	2.90342	1.4087	0.000184314	-1.03877	0.58182	0.434554	Q192X
12	3794	-0.564042	0.139714	-0.703755	0.540837	0.733633	-0.959908	1.30123	0.959274	0.00082514	-0.70998	0.61748	0.45312	Dom_Oligomerization
30	3794	-0.296067	0.139714	-0.435781	0.538531	0.733633	-0.595046	0.809203	0.594004	0.00118636	-0.435743	0.594888	0.395815	pos 220
12	3794	-0.538924	0.139714	-0.678638	0.422817	0.733633	-0.925932	1.60504	0.925037	0.00136837	-0.679067	0.60719	0.427722	pos 173
117	3794	-0.0787535	0.139714	-0.218467	0.730511	0.733633	-0.297825	0.299061	0.297788	0.00149065	-0.218884	0.431039	0.325254	Dom_HCD_III.DNA_binding
26	3794	-0.313942	0.139714	-0.453656	0.729836	0.733633	-0.618389	0.621585	0.618368	0.00166314	-0.45436	0.488078	0.450464	R213X
9	3794	-0.628284	0.139714	-0.767997	0.738736	0.733633	-1.04683	1.03961	1.04684	0.00172762	-0.767853	0.592366	0.400548	pos 194
10	3794	-0.571764	0.139714	-0.711478	0.562826	0.733633	-0.970273	1.26412	0.9698	0.00204935	-0.716757	0.617226	0.454004	StrB_Alpha_Helix
10	3794	-0.571764	0.139714	-0.711478	0.562826	0.733633	-0.970273	1.26412	0.9698	0.00204935	-0.716757	0.617226	0.454004	PTM_Methylation
10	3794	-0.571764	0.139714	-0.711478	0.562826	0.733633	-0.970273	1.26412	0.9698	0.00204935	-0.716757	0.617226	0.454004	pos 337
26	3794	-0.297735	0.139714	-0.437448	0.550954	0.733633	-0.59713	0.793984	0.596277	0.00241495	-0.43796	0.594412	0.402855	Y220C
4	3794	-0.891476	0.139714	-1.03119	0.556637	0.733633	-1.40583	1.85253	1.40559	0.00480441	-1.03579	0.611038	0.436179	A159P
51	3794	-0.151919	0.139714	-0.291632	0.783273	0.733633	-0.397156	0.372325	0.397518	0.00500783	-0.290712	0.502653	0.364504	pos 175
22	3794	-0.292745	0.139714	-0.432459	0.756838	0.733633	-0.589371	0.571403	0.589476	0.00579152	-0.433311	0.576112	0.39074	pos 249
7	3794	-0.616492	0.139714	-0.756205	0.389717	0.733633	-1.03135	1.94039	1.03077	0.00606424	-0.761915	0.581716	0.419353	Q317X
86	3794	-0.0781934	0.139714	-0.217907	0.695505	0.733633	-0.297354	0.313308	0.297024	0.00618369	-0.21897	0.490537	0.508948	pos 248
53	3794	-0.133527	0.139714	-0.273241	0.709776	0.733633	-0.37261	0.384967	0.372448	0.0067164	-0.275172	0.573854	0.436462	R248Q
8	3794	-0.553259	0.139714	-0.692973	0.900873	0.733633	-0.944135	0.769224	0.944577	0.00723171	-0.698449	0.620893	0.434066	pos 159
14	3794	-0.383867	0.139714	-0.52358	0.767333	0.733633	-0.713567	0.682338	0.713681	0.00743253	-0.526349	0.591729	0.468294	pos 195
44	3794	-0.158637	0.139714	-0.298351	0.797496	0.733633	-0.406263	0.37411	0.406676	0.00774415	-0.296742	0.511054	0.366394	R175H
17	3794	-0.333269	0.139714	-0.472982	0.709823	0.733633	-0.644799	0.666338	0.644712	0.00774721	-0.475177	0.584237	0.465216	StrB_Beta_Strand_S5
10	3794	-0.4721	0.139714	-0.611813	0.705633	0.733633	-0.834023	0.867041	0.833949	0.00818691	-0.615116	0.634367	0.433522	R273L
24	3794	-0.252259	0.139714	-0.391973	0.686803	0.733633	-0.534489	0.570721	0.53429	0.00915668	-0.39162	0.614422	0.379092	StrB_Beta_Strand_S2.
6	3794	-0.631648	0.139714	-0.771362	0.339808	0.733633	-1.05197	2.26999	1.05143	0.00968076	-0.775796	0.587378	0.416352	pos 105
30	3794	-0.203847	0.139714	-0.343561	0.748255	0.733633	-0.468229	0.459149	0.4683	0.0103746	-0.344957	0.498728	0.450474	pos 193
8	3794	-0.522636	0.139714	-0.66235	0.519518	0.733633	-0.903249	1.27493	0.902835	0.0105334	-0.664315	0.611744	0.42192	V173M
7	3794	-0.558647	0.139714	-0.698361	0.560109	0.733633	-0.952234	1.24683	0.95192	0.0111856	-0.704662	0.620244	0.417969	Y236C
4	3794	-0.756358	0.139714	-0.896071	0.618296	0.733633	-1.22156	1.44926	1.22142	0.0132737	-0.90992	0.588431	0.416006	C275Y
3	3794	-0.881811	0.139714	-1.02152	0.531266	0.733633	-1.39259	1.92281	1.39242	0.0153398	-1.02783	0.604204	0.415072	S106R
3	3794	-0.881811	0.139714	-1.02152	0.531266	0.733633	-1.39259	1.92281	1.39242	0.0153398	-1.02783	0.604204	0.415072	pos 106
3	3794	-0.864854	0.139714	-1.00457	0.458426	0.733633	-1.36952	2.19134	1.3693	0.0186867	-0.997113	0.606035	0.401833	E339X
8	3794	-0.463717	0.139714	-0.603431	0.58395	0.733633	-0.822802	1.03336	0.822524	0.0188758	-0.610191	0.619349	0.415616	pos 236
8	3794	-0.467124	0.139714	-0.606837	0.84765	0.733633	-0.826912	0.715906	0.827167	0.0193634	-0.607737	0.643901	0.455022	pos 239
22	3794	-0.219695	0.139714	-0.359408	0.726602	0.733633	-0.489927	0.494642	0.489902	0.0202635	-0.364515	0.555415	0.423188	pos 158
12	3794	-0.347229	0.139714	-0.486943	0.779065	0.733633	-0.663619	0.625035	0.663742	0.0219119	-0.486528	0.543761	0.401983	H193R
18	3794	-0.253923	0.139714	-0.393636	0.802813	0.733633	-0.536321	0.490322	0.536557	0.0232375	-0.393794	0.573172	0.376418	R249S
6	3794	-0.527724	0.139714	-0.667437	0.294129	0.733633	-0.910273	2.2692	0.90977	0.0235134	-0.679537	0.601689	0.42353	R337C
77	3794	-0.0466975	0.139714	-0.186411	0.678633	0.733633	-0.254454	0.274686	0.254093	0.024453	-0.189973	0.478556	0.397781	Dom_HCD_II.DNA_binding
11	3794	-0.357052	0.139714	-0.496766	0.818255	0.733633	-0.676913	0.607103	0.67713	0.0244662	-0.498815	0.567205	0.473659	pos 275
6	3794	-0.526627	0.139714	-0.666341	0.646349	0.733633	-0.908409	1.03093	0.908275	0.0249122	-0.672649	0.593084	0.393117	E271K
61	3794	-0.0687535	0.139714	-0.208467	0.730708	0.733633	-0.284175	0.285295	0.284157	0.0264019	-0.21038	0.573156	0.396448	transcriptional_active_partially
8	3794	-0.430615	0.139714	-0.570328	0.661617	0.733633	-0.777536	0.862022	0.777402	0.0275901	-0.572286	0.614462	0.432231	pos 272
32	3794	-0.145048	0.139714	-0.284761	0.698939	0.733633	-0.388298	0.407419	0.388152	0.0292856	-0.283903	0.529763	0.336954	StrB_Beta_Strand_S7
8	3794	-0.423307	0.139714	-0.563021	0.337182	0.733633	-0.768	1.66978	0.767442	0.0300761	-0.563211	0.597402	0.425637	E286K
5	3794	0.844211	0.139714	0.704498	0.497369	0.733633	0.960559	1.41645	0.960286	0.0331101	0.699788	0.623777	0.400888	pos 181
7	3794	-0.447962	0.139714	-0.587676	0.69351	0.733633	-0.801116	0.847394	0.801049	0.0338049	-0.58931	0.586238	0.418869	L194R
11	3794	-0.327401	0.139714	-0.467114	0.623538	0.733633	-0.636946	0.749135	0.636714	0.0345031	-0.4684	0.615768	0.457618	Y163C
7	3794	-0.44009	0.139714	-0.579803	0.265145	0.733633	-0.790861	2.18674	0.790317	0.035285	-0.584241	0.599383	0.419696	pos 141
7	3794	-0.431377	0.139714	-0.57109	0.641598	0.733633	-0.778586	0.890106	0.778441	0.0376847	-0.5771	0.605713	0.387716	pos 271
22	3794	-0.18123	0.139714	-0.320943	0.570811	0.733633	-0.437947	0.562258	0.437471	0.0400008	-0.321977	0.613328	0.393733	R196X
4	3794	-0.587807	0.139714	-0.727521	0.57899	0.733633	-0.991816	1.25654	0.991668	0.0438026	-0.740582	0.576914	0.416651	R267P
19	3794	-0.195091	0.139714	-0.334805	0.841104	0.733633	-0.456027	0.398054	0.456365	0.0459364	-0.337254	0.631765	0.383804	StrB_Beta_Strand_S8
7	3794	-0.408222	0.139714	-0.547936	0.605946	0.733633	-0.747067	0.904265	0.746879	0.0473801	-0.550469	0.59092	0.407362	PTM_ADP_Ribosylation
7	3794	-0.409245	0.139714	-0.548959	0.754478	0.733633	-0.74824	0.727601	0.748274	0.0475491	-0.550203	0.581926	0.403629	pos 216
69	3794	-0.032685	0.139714	-0.172399	0.638197	0.733633	-0.235498	0.270134	0.234993	0.0503598	-0.174151	0.535834	0.378307	Zinc_binding_176_179_238_242
69	3794	-0.032685	0.139714	-0.172399	0.638197	0.733633	-0.235498	0.270134	0.234993	0.0503598	-0.174151	0.535834	0.378307	Stabilize_L2.L3_region
6	3794	-0.443128	0.139714	-0.582842	0.780664	0.733633	-0.79439	0.746598	0.794459	0.0527701	-0.580915	0.614817	0.433383	V272M
27	3794	-0.130247	0.139714	-0.269961	0.78633	0.733633	-0.367791	0.343317	0.367978	0.0531535	-0.274371	0.581032	0.417139	StrB_Helix_H4
27	3794	-0.130247	0.139714	-0.269961	0.78633	0.733633	-0.367791	0.343317	0.367978	0.0531535	-0.274371	0.581032	0.417139	R282W
27	3794	-0.130247	0.139714	-0.269961	0.78633	0.733633	-0.367791	0.343317	0.367978	0.0531535	-0.274371	0.581032	0.417139	pos 282
13	3794	-0.248352	0.139714	-0.388066	0.545512	0.733633	-0.529337	0.711379	0.528964	0.0546812	-0.391577	0.593333	0.419463	StrB_Beta_Strand_S3
12	3794	-0.270051	0.139714	-0.409765	0.639572	0.733633	-0.558736	0.640686	0.558542	0.0552034	-0.406791	0.556099	0.476617	pos 241
5	3794	-0.490995	0.139714	-0.630709	0.228851	0.733633	-0.860115	2.75598	0.859706	0.0558462	-0.627798	0.579532	0.41674	P151S
8	3794	-0.354977	0.139714	-0.49469	0.720972	0.733633	-0.674323	0.686144	0.674302	0.0567064	-0.495102	0.584118	0.434234	G245D
11	3794	-0.280603	0.139714	-0.420317	0.387239	0.733633	-0.573469	1.08542	0.572925	0.057716	-0.420205	0.612553	0.417097	StrB_Helix_H8
7	3794	-0.381903	0.139714	-0.521616	0.676595	0.733633	-0.711088	0.770943	0.711004	0.0578478	-0.526908	0.536166	0.449253	pos 267
11	3794	-0.280072	0.139714	-0.419785	0.758656	0.733633	-0.572148	0.553328	0.572201	0.0580561	-0.42008	0.624122	0.376391	PTM_Ubiquitination
11	3794	-0.280072	0.139714	-0.419785	0.758656	0.733633	-0.572148	0.553328	0.572201	0.0580561	-0.42008	0.624122	0.376391	pos 132
17	3794	-0.200146	0.139714	-0.33986	0.831428	0.733633	-0.462979	0.408766	0.463256	0.0581983	-0.338261	0.609719	0.450221	Inframe_deletion
5	3794	-0.461374	0.139714	-0.601088	1.16649	0.733633	-0.818671	0.515297	0.81933	0.0646189	-0.607977	0.626359	0.414309	I195F
16	3794	-0.198949	0.139714	-0.338662	0.553106	0.733633	-0.462016	0.612291	0.461623	0.0646431	-0.339646	0.543703	0.400364	pos 238
7	3794	-0.374225	0.139714	-0.513939	0.72701	0.733633	-0.700549	0.706922	0.700539	0.0651485	-0.512221	0.60822	0.411141	K132N
6	3794	-0.409369	0.139714	-0.549082	0.351472	0.733633	-0.748822	1.56223	0.748442	0.0654841	-0.552146	0.595947	0.407744	G266V
5	3794	-0.449213	0.139714	-0.588927	0.67343	0.733633	-0.80282	0.874517	0.802753	0.070512	-0.594071	0.566856	0.439551	Q144X
8	3794	-0.324866	0.139714	-0.46458	0.468305	0.733633	-0.633604	0.992044	0.633258	0.0762975	-0.460597	0.593649	0.410411	pos 213
4	3794	-0.510158	0.139714	-0.649872	0.845908	0.733633	-0.885711	0.768254	0.885826	0.0785529	-0.646092	0.589149	0.402501	pos 135
5	3794	-0.43046	0.139714	-0.570174	0.89391	0.733633	-0.776993	0.637842	0.777192	0.0819112	-0.57155	0.598465	0.394699	V216M
3	3794	-0.588523	0.139714	-0.728237	0.183547	0.733633	-0.992889	3.96757	0.992644	0.0840666	-0.732166	0.590897	0.420805	V173L
7	3794	-0.334302	0.139714	-0.474016	0.485317	0.733633	-0.646408	0.976715	0.646121	0.0864072	-0.475998	0.607443	0.437063	C242F
6	3794	-0.370083	0.139714	-0.509797	0.960172	0.733633	-0.694567	0.530943	0.694893	0.0877645	-0.51226	0.633226	0.466133	N239D
12	3794	-0.219407	0.139714	-0.35912	0.42575	0.733633	-0.489979	0.843501	0.489509	0.0892053	-0.360323	0.60494	0.408413	pos 286
6	3794	-0.368484	0.139714	-0.508198	0.505744	0.733633	-0.692953	1.00485	0.692713	0.0893065	-0.50931	0.579687	0.42475	Q136X
20	3794	-0.128865	0.139714	-0.268578	0.832955	0.733633	-0.36583	0.32244	0.366093	0.0939258	-0.276094	0.562516	0.435945	pos 157
5	3794	-0.411214	0.139714	-0.550928	1.25765	0.733633	-0.750192	0.438062	0.750958	0.0939916	-0.550992	0.580353	0.433075	S183X
6	3794	-0.355992	0.139714	-0.495706	0.226419	0.733633	-0.676089	2.18933	0.675686	0.0969563	-0.497714	0.598715	0.408685	C238Y
4	3794	-0.461509	0.139714	-0.601223	0.897543	0.733633	-0.819353	0.669854	0.819514	0.098835	-0.606198	0.598603	0.435879	pos 111
3	3794	-0.560149	0.139714	-0.699863	0.717358	0.733633	-0.953979	0.975612	0.953968	0.100669	-0.696414	0.594968	0.415686	R213L
10	3794	-0.231251	0.139714	-0.370965	0.761725	0.733633	-0.505608	0.487006	0.505655	0.102135	-0.380177	0.580518	0.411776	R158L
3	3794	-0.539161	0.139714	-0.678875	0.153484	0.733633	-0.925593	4.42309	0.92536	0.1055	-0.686121	0.592172	0.417847	G105C
5	3794	-0.377967	0.139714	-0.51768	0.400382	0.733633	-0.7059	1.29297	0.705639	0.108236	-0.527676	0.602153	0.41508	M237I
6	3794	-0.335671	0.139714	-0.475384	0.510958	0.733633	-0.648206	0.930378	0.647986	0.115755	-0.471695	0.603458	0.415156	StrB_Helix_H3
6	3794	-0.335671	0.139714	-0.475384	0.510958	0.733633	-0.648206	0.930378	0.647986	0.115755	-0.471695	0.603458	0.415156	pos 281
8	3794	-0.252662	0.139714	-0.392376	0.544329	0.733633	-0.53506	0.720843	0.534839	0.123999	-0.399622	0.574546	0.43246	pos 237
11	3794	-0.197982	0.139714	-0.337696	0.772124	0.733633	-0.460241	0.437359	0.460306	0.124324	-0.340658	0.584966	0.433184	StrB_Beta_Strand_S9
5	3794	-0.363123	0.139714	-0.502837	0.379254	0.733633	-0.68567	1.32586	0.685406	0.124682	-0.504094	0.585923	0.433558	S241F
18	3794	-0.115719	0.139714	-0.255433	0.878702	0.733633	-0.347838	0.290693	0.348175	0.129826	-0.263168	0.562674	0.440474	V157F
6	3794	0.585219	0.139714	0.445506	0.870942	0.733633	0.607096	0.511522	0.607259	0.139323	0.443425	0.618432	0.436696	G245V
5	3794	-0.339414	0.139714	-0.479128	0.424514	0.733633	-0.653318	1.12865	0.653089	0.142331	-0.481902	0.620458	0.428529	P250L
5	3794	-0.339414	0.139714	-0.479128	0.424514	0.733633	-0.653318	1.12865	0.653089	0.142331	-0.481902	0.620458	0.428529	pos 250
15	3794	-0.135617	0.139714	-0.27533	0.710088	0.733633	-0.37534	0.387741	0.375297	0.14598	-0.276013	0.612276	0.469255	pos 163
3	3794	-0.464034	0.139714	-0.603748	0.376025	0.733633	-0.823115	1.60561	0.822955	0.151426	-0.608376	0.595985	0.41553	pos 265
8	3794	-0.228687	0.139714	-0.368401	0.826832	0.733633	-0.502034	0.445557	0.502159	0.152535	-0.371811	0.599796	0.470167	H193L
3	3794	-0.444551	0.139714	-0.584265	0.603789	0.733633	-0.796467	0.967664	0.796399	0.170754	-0.580844	0.584397	0.426709	M246V
4	3794	-0.336208	0.139714	-0.475922	0.957995	0.733633	-0.648538	0.496789	0.648719	0.187528	-0.484092	0.584425	0.410264	R175G
4	3794	0.621386	0.139714	0.481672	0.674086	0.733633	0.656598	0.714556	0.656557	0.188397	0.482877	0.633996	0.391743	Q331X
4	3794	-0.340028	0.139714	-0.479742	0.32083	0.733633	-0.654135	1.49532	0.653926	0.195446	-0.475272	0.595892	0.402891	pos 270
16	3794	-0.095446	0.139714	-0.23516	0.591358	0.733633	-0.320762	0.397661	0.320541	0.19755	-0.236753	0.582489	0.447284	H179R
11	3794	-0.140141	0.139714	-0.279855	0.639542	0.733633	-0.381585	0.437586	0.381464	0.202246	-0.282507	0.620322	0.372114	pos 266
10	3794	-0.15699	0.139714	-0.296704	0.447277	0.733633	-0.404732	0.663356	0.40443	0.205478	-0.294054	0.574874	0.417724	pos 151
29	3794	-0.0286967	0.139714	-0.16841	0.586068	0.733633	-0.229861	0.287356	0.229557	0.210722	-0.171012	0.579093	0.431978	pos 179
3	3794	-0.375706	0.139714	-0.51542	0.2788	0.733633	-0.702716	1.84871	0.702558	0.224596	-0.514737	0.606425	0.407638	PTM_Acetylation.Ubiquitination
4	3794	-0.3036	0.139714	-0.443313	0.0969015	0.733633	-0.604506	4.57488	0.604271	0.225572	-0.444725	0.590859	0.41339	C141W
3	3794	-0.363409	0.139714	-0.503123	0.943338	0.733633	-0.685678	0.533343	0.685796	0.236341	-0.502044	0.581893	0.407374	P278R
3	3794	-0.347209	0.139714	-0.486922	1.10931	0.733633	-0.663489	0.438941	0.663714	0.245679	-0.492546	0.61728	0.414586	S94X
28	3794	-0.0204293	0.139714	-0.160143	0.623214	0.733633	-0.218502	0.256963	0.218287	0.252441	-0.159153	0.516887	0.43248	R248W
3	3794	-0.33074	0.139714	-0.470453	0.558557	0.733633	-0.641336	0.842266	0.641265	0.257128	-0.480451	0.572421	0.416922	T155N
11	3794	-0.102871	0.139714	-0.242584	0.553754	0.733633	-0.330849	0.438072	0.330662	0.26936	-0.244687	0.612204	0.447386	pos 242
5	3794	-0.21117	0.139714	-0.350883	0.970926	0.733633	-0.478092	0.36139	0.478281	0.289682	-0.347853	0.56621	0.374076	PTM_Ser_Phosphorylation
5	3794	-0.21117	0.139714	-0.350883	0.970926	0.733633	-0.478092	0.36139	0.478281	0.289682	-0.347853	0.56621	0.374076	pos 215
3	3794	0.596306	0.139714	0.456592	0.728947	0.733633	0.622373	0.626372	0.622371	0.290566	0.448152	0.592846	0.415811	R110L
13	3794	-0.0791768	0.139714	-0.21889	0.711455	0.733633	-0.298393	0.307666	0.298365	0.291936	-0.214898	0.562695	0.478253	R342X
4	3794	-0.232885	0.139714	-0.372598	0.690933	0.733633	-0.507904	0.539269	0.507881	0.305842	-0.375948	0.602354	0.411545	R273S
5	3794	-0.187768	0.139714	-0.327482	0.751166	0.733633	-0.446372	0.435965	0.446383	0.314473	-0.330337	0.554456	0.384986	C176Y
3	3794	-0.295274	0.139714	-0.434988	0.846975	0.733633	-0.592871	0.513578	0.592923	0.316075	-0.425127	0.620503	0.414283	pos 232
5	3794	-0.179338	0.139714	-0.319051	0.56598	0.733633	-0.434985	0.563714	0.434892	0.322263	-0.325059	0.561485	0.443444	G262V
5	3794	-0.179338	0.139714	-0.319051	0.56598	0.733633	-0.434985	0.563714	0.434892	0.322263	-0.325059	0.561485	0.443444	pos 262
4	3794	-0.228608	0.139714	-0.368322	0.707036	0.733633	-0.502065	0.520938	0.502051	0.322447	-0.363266	0.605842	0.425541	H179D
4	3794	-0.215043	0.139714	-0.354756	1.13083	0.733633	-0.483298	0.313713	0.483561	0.325147	-0.361468	0.59637	0.422702	A159V
3	3794	0.552157	0.139714	0.412444	0.820156	0.733633	0.562156	0.502884	0.562193	0.336262	0.407612	0.597402	0.431891	Y163H
3	3794	-0.242185	0.139714	-0.381899	0.453671	0.733633	-0.520643	0.841797	0.520558	0.35673	-0.390723	0.615012	0.414469	A161T
6	3794	-0.132413	0.139714	-0.272127	0.511583	0.733633	-0.371055	0.53193	0.37093	0.358836	-0.275044	0.586751	0.440929	pos 126
7	3794	-0.109686	0.139714	-0.2494	0.743119	0.733633	-0.339944	0.335612	0.339951	0.363323	-0.252385	0.588558	0.414394	R175_nonH
11	3794	-0.0580067	0.139714	-0.19772	0.691312	0.733633	-0.269548	0.286007	0.269508	0.371032	-0.198185	0.553205	0.464893	StrB_Beta_Strand_S6
11	3794	-0.0580067	0.139714	-0.19772	0.691312	0.733633	-0.269548	0.286007	0.269508	0.371032	-0.198185	0.553205	0.464893	pos 205
19	3794	0.291131	0.139714	0.151417	0.773214	0.733633	0.20634	0.195828	0.206394	0.392598	0.144424	0.58541	0.34988	T125T_silent_hotspot
3	3794	-0.216704	0.139714	-0.356417	0.159313	0.733633	-0.485947	2.23722	0.485825	0.395793	-0.359829	0.597731	0.412963	E56X
8	3794	-0.0731464	0.139714	-0.21286	0.463337	0.733633	-0.290306	0.459406	0.290145	0.398915	-0.219112	0.576825	0.414001	pos 155
8	3794	0.35038	0.139714	0.210667	0.558495	0.733633	0.287267	0.377204	0.287155	0.428705	0.205517	0.55013	0.426457	W91X
3	3794	-0.194747	0.139714	-0.33446	0.129395	0.733633	-0.456012	2.5848	0.455896	0.444789	-0.323904	0.599471	0.415309	R337H
39	3794	0.0480832	0.139714	-0.0916304	0.653034	0.733633	-0.125028	0.140315	0.124899	0.446814	-0.0897662	0.555605	0.422071	R273H
9	3794	-0.0397505	0.139714	-0.179464	1.21619	0.733633	-0.244175	0.147563	0.244624	0.447131	-0.186633	0.6071	0.46563	StrB_Helix_H7
9	3794	-0.0397505	0.139714	-0.179464	1.21619	0.733633	-0.244175	0.147563	0.244624	0.447131	-0.186633	0.6071	0.46563	pos 285
6	3794	0.360561	0.139714	0.220847	0.752593	0.733633	0.301022	0.293449	0.301032	0.46336	0.219914	0.583299	0.441267	R280K
3	3794	0.436085	0.139714	0.296371	0.705048	0.733633	0.403985	0.420356	0.403977	0.464755	0.309998	0.627099	0.413835	P278A
4	3794	0.399565	0.139714	0.259851	1.00327	0.733633	0.354076	0.259004	0.354198	0.480443	0.259107	0.609422	0.391975	E171X
3	3794	-0.169543	0.139714	-0.309257	0.479195	0.733633	-0.421605	0.645368	0.421541	0.481369	-0.29856	0.606419	0.41121	pos 109
7	3794	-0.0539541	0.139714	-0.193668	0.641033	0.733633	-0.264034	0.302118	0.263984	0.484419	-0.194077	0.544538	0.413958	C238F
4	3794	-0.113239	0.139714	-0.252953	0.313416	0.733633	-0.344906	0.807082	0.344795	0.488043	-0.254474	0.590989	0.405756	P190L
39	3794	0.059436	0.139714	-0.0802776	0.637519	0.733633	-0.109558	0.125922	0.109425	0.4882	-0.0817719	0.545299	0.405398	StrB_Helix_H1
4	3794	-0.118624	0.139714	-0.258337	0.52391	0.733633	-0.352202	0.493095	0.352134	0.500256	-0.247532	0.58185	0.416334	S241Y
4	3794	-0.108629	0.139714	-0.248342	0.20619	0.733633	-0.338633	1.20443	0.33851	0.502195	-0.2463	0.591248	0.41608	R213Q
7	3794	-0.0413065	0.139714	-0.18102	0.5805	0.733633	-0.246818	0.311835	0.246745	0.503131	-0.185856	0.557805	0.426962	R158H
13	3794	0.012858	0.139714	-0.126856	0.639141	0.733633	-0.17298	0.198478	0.172914	0.523789	-0.12995	0.616659	0.411996	transcriptional_active
6	3794	0.335156	0.139714	0.195442	0.553467	0.733633	0.266479	0.353124	0.266403	0.529809	0.188377	0.603101	0.398502	H179Y
6	3794	-0.0381259	0.139714	-0.177839	0.791342	0.733633	-0.242383	0.224732	0.242409	0.535658	-0.185796	0.569215	0.451801	pos 125
5	3794	-0.058987	0.139714	-0.198701	0.643323	0.733633	-0.270877	0.308866	0.270845	0.535733	-0.203353	0.577617	0.39107	H193Y
4	3794	0.367872	0.139714	0.228158	0.476026	0.733633	0.311068	0.479297	0.310997	0.537416	0.226409	0.592004	0.425644	P278S
6	3794	-0.0461361	0.139714	-0.18585	0.680266	0.733633	-0.253351	0.273202	0.253328	0.54063	-0.183443	0.551617	0.443523	pos 246
3	3794	-0.104361	0.139714	-0.244075	0.380897	0.733633	-0.332757	0.64079	0.332693	0.547789	-0.254807	0.599891	0.415311	L130V
5	3794	-0.0487247	0.139714	-0.188438	0.437702	0.733633	-0.256943	0.430517	0.256856	0.554523	-0.194054	0.573852	0.404458	pos 127
4	3794	-0.0806665	0.139714	-0.22038	0.707646	0.733633	-0.300404	0.311427	0.300395	0.5555	-0.216458	0.60472	0.394271	P152L
3	3794	-0.104	0.139714	-0.243713	0.462078	0.733633	-0.332253	0.527429	0.3322	0.56773	-0.24215	0.600221	0.412424	Y220S
5	3794	-0.037552	0.139714	-0.177266	1.00962	0.733633	-0.241513	0.175577	0.241627	0.568424	-0.187515	0.613671	0.414861	pos 110
3	3794	0.385591	0.139714	0.245878	0.610397	0.733633	0.335178	0.402816	0.33515	0.574011	0.238283	0.578996	0.42989	V143M
3	3794	-0.104774	0.139714	-0.244488	0.840213	0.733633	-0.333229	0.290983	0.333256	0.576475	-0.236785	0.564202	0.394418	pos 255
6	3794	-0.0246582	0.139714	-0.164372	0.719946	0.733633	-0.224057	0.228311	0.224052	0.578032	-0.166783	0.598207	0.407716	pos 143
3	3794	-0.108572	0.139714	-0.248285	0.702345	0.733633	-0.33844	0.353509	0.338433	0.581272	-0.233872	0.568897	0.417159	pos 177
6	3794	-0.0228837	0.139714	-0.162597	0.686652	0.733633	-0.221651	0.236797	0.221633	0.586369	-0.163114	0.575376	0.442745	Y205C
7	3794	-0.0131147	0.139714	-0.152828	0.683342	0.733633	-0.208339	0.223648	0.208317	0.59164	-0.148938	0.640181	0.389244	pos 152
13	3794	0.252622	0.139714	0.112908	0.912404	0.733633	0.15377	0.123748	0.153903	0.593576	0.109101	0.525051	0.427504	G245S
22	3794	0.22583	0.139714	0.0861164	0.75915	0.733633	0.117361	0.113438	0.117383	0.609411	0.0802256	0.597636	0.326329	Coding_Silent
7	3794	0.277823	0.139714	0.138109	0.729593	0.733633	0.188256	0.189296	0.188254	0.609918	0.141645	0.57644	0.407403	C176F
4	3794	-0.0323361	0.139714	-0.17205	0.813097	0.733633	-0.234496	0.211598	0.234517	0.625306	-0.1794	0.595349	0.415693	StrB_Loop_L1
6	3794	2.53795e-05	0.139714	-0.139688	0.361096	0.733633	-0.190501	0.386845	0.190406	0.636862	-0.141472	0.597423	0.423563	pos 130
6	3794	0.00304412	0.139714	-0.136669	0.284914	0.733633	-0.186395	0.479686	0.186291	0.651731	-0.13525	0.5921	0.409911	pos 136
15	3794	0.0547105	0.139714	-0.0850031	0.683259	0.733633	-0.115894	0.124408	0.115866	0.65868	-0.083888	0.589707	0.432631	pos 278
5	3794	0.00635478	0.139714	-0.133359	0.81122	0.733633	-0.181757	0.164393	0.181779	0.668576	-0.140708	0.573525	0.416952	pos 161
3	3794	0.329559	0.139714	0.189845	0.628548	0.733633	0.258792	0.302038	0.258774	0.673644	0.178555	0.597743	0.415501	R156P
3	3794	0.329559	0.139714	0.189845	0.628548	0.733633	0.258792	0.302038	0.258774	0.673644	0.178555	0.597743	0.415501	pos 156
13	3794	0.222438	0.139714	0.0827245	0.869882	0.733633	0.112688	0.0950985	0.11276	0.68372	0.0831104	0.556389	0.362325	pos 176
3	3794	-0.025518	0.139714	-0.165232	0.686084	0.733633	-0.225231	0.240833	0.225224	0.7036	-0.161337	0.586887	0.398111	G266R
3	3794	-0.0076819	0.139714	-0.147396	0.994004	0.733633	-0.200867	0.148285	0.200912	0.711089	-0.157079	0.59699	0.415668	pos 113
3	3794	0.290195	0.139714	0.150481	1.0329	0.733633	0.205065	0.145688	0.205118	0.728927	0.146919	0.585883	0.387752	G244C
5	3794	0.0351538	0.139714	-0.10456	0.786948	0.733633	-0.142512	0.132868	0.142523	0.755634	-0.102245	0.574746	0.430781	H193P
9	3794	0.208017	0.139714	0.0683037	0.738962	0.733633	0.0931019	0.0924321	0.0931034	0.784447	0.0669845	0.568848	0.408709	H214R
6	3794	0.225897	0.139714	0.0861837	0.610777	0.733633	0.117499	0.141105	0.117475	0.798287	0.0766431	0.611011	0.416788	StrB_Helix_H5
6	3794	0.225897	0.139714	0.0861837	0.610777	0.733633	0.117499	0.141105	0.117475	0.798287	0.0766431	0.611011	0.416788	pos 283
3	3794	0.239061	0.139714	0.0993474	0.251792	0.733633	0.13545	0.394561	0.135418	0.802193	0.106197	0.609233	0.414754	P151H
4	3794	0.238136	0.139714	0.0984221	0.773532	0.733633	0.134151	0.127237	0.134157	0.807645	0.0894058	0.568744	0.444572	T125M
6	3794	0.216403	0.139714	0.0766899	1.19925	0.733633	0.104419	0.0639481	0.104534	0.80934	0.0724214	0.60407	0.382731	Y234C
4	3794	0.0671534	0.139714	-0.0725602	0.364255	0.733633	-0.0989347	0.199202	0.0989052	0.816965	-0.0849872	0.590165	0.415819	E294X
3	3794	0.244161	0.139714	0.104447	1.19732	0.733633	0.142308	0.0872343	0.14237	0.818962	0.0970661	0.585726	0.44999	R248L
3	3794	0.05405	0.139714	-0.0856636	1.52504	0.733633	-0.116664	0.0561714	0.116766	0.842409	-0.0843406	0.620528	0.382299	Q100X
3	3794	0.221331	0.139714	0.0816179	0.62761	0.733633	0.111259	0.130046	0.111252	0.845837	0.082417	0.595201	0.424953	E221X
5	3794	0.0814097	0.139714	-0.0583039	0.374266	0.733633	-0.0795038	0.155782	0.0794728	0.849152	-0.0624529	0.597633	0.408987	T155P
5	3794	0.209227	0.139714	0.0695134	0.681342	0.733633	0.0947591	0.102024	0.0947522	0.859582	0.0581279	0.61338	0.414612	R283P
3	3794	0.074807	0.139714	-0.0649066	0.473121	0.733633	-0.0884864	0.137188	0.0884728	0.862182	-0.0735938	0.583636	0.416261	S127Y
14	3794	0.17862	0.139714	0.0389065	0.913998	0.733633	0.0529826	0.0425673	0.0530326	0.862228	0.0341378	0.600799	0.410734	pos 280
3	3794	0.213139	0.139714	0.0734253	0.809004	0.733633	0.100079	0.0907601	0.100084	0.863515	0.0728702	0.573961	0.397757	C277F
3	3794	0.213139	0.139714	0.0734253	0.809004	0.733633	0.100079	0.0907601	0.100084	0.863515	0.0728702	0.573961	0.397757	pos 277
5	3794	0.095923	0.139714	-0.0437906	0.708252	0.733633	-0.0596922	0.0618292	0.0596901	0.868148	-0.0545419	0.592252	0.408315	E298X
3	3794	0.0747052	0.139714	-0.0650084	0.865658	0.733633	-0.0886024	0.0750971	0.0886116	0.871999	-0.0683588	0.623529	0.414102	E285X
7	3794	0.187842	0.139714	0.0481288	1.09737	0.733633	0.0655393	0.0438584	0.0656033	0.879916	0.0419883	0.606737	0.383968	pos 234
3	3794	0.0779959	0.139714	-0.0617177	1.07116	0.733633	-0.084101	0.0576175	0.0841261	0.884609	-0.0615377	0.592636	0.395501	G266E
3	3794	0.192344	0.139714	0.0526302	0.201467	0.733633	0.0717566	0.261235	0.0717391	0.893992	0.056464	0.593411	0.410502	R175C
5	3794	0.0917234	0.139714	-0.0479902	0.949251	0.733633	-0.0653912	0.0505559	0.0654145	0.896576	-0.0427093	0.572198	0.438974	C275F
3	3794	0.0882936	0.139714	-0.05142	0.0890335	0.733633	-0.0701077	0.577535	0.0700895	0.90333	-0.0514686	0.595188	0.416527	R280T
5	3794	0.180224	0.139714	0.0405102	0.710123	0.733633	0.0552204	0.0570467	0.0552186	0.905333	0.0390528	0.623385	0.389613	pos 190
7	3794	0.112191	0.139714	-0.0275228	1.33082	0.733633	-0.0374481	0.0206812	0.0375158	0.905955	-0.0328676	0.597142	0.453945	E285K
6	3794	0.16898	0.139714	0.0292662	0.743405	0.733633	0.0398915	0.0393679	0.0398922	0.916159	0.0315645	0.568566	0.391289	pos 244
10	3794	0.163455	0.139714	0.0237415	0.710808	0.733633	0.0323639	0.0334008	0.0323616	0.92342	0.0223346	0.561702	0.413514	pos 214
13	3794	0.125943	0.139714	-0.0137703	0.602246	0.733633	-0.0187797	0.022865	0.01877	0.947213	-0.0134915	0.633621	0.376784	R306X
4	3794	0.11603	0.139714	-0.0236838	0.257699	0.733633	-0.032294	0.0919048	0.0322828	0.953818	-0.0212535	0.59596	0.405829	Q136E
5	3794	0.130974	0.139714	-0.00873943	0.733057	0.733633	-0.0119125	0.0119219	0.0119125	0.954018	-0.0189452	0.598729	0.438194	G245C
4	3794	0.130457	0.139714	-0.00925665	0.173936	0.733633	-0.0126222	0.0532187	0.0126175	0.991061	-0.00411425	0.588075	0.415891	I195T
31	3794	0.145428	0.139714	0.00571396	0.73643	0.733633	0.00778834	0.007759	0.00778857	0.995476	-0.000751117	0.534582	0.410813	StrB_Beta_Strand_S2
32	3794	0.144077	0.139714	0.00436308	0.859195	0.733633	0.00593829	0.00507811	0.00594723	0.995917	0.000667984	0.560711	0.461462	pos 245

## Sheet: table S4C
Table S4C. Full list of ANOVA pan-cancer interactions between TP53 mutation classes and TP53 activity in cell lines
POS	NEG	POS_Y_MEAN	NEG_Y_MEAN	deltaMEAN_Y	POS_Y_sd	NEG_Y_sd	X_effect_size	X_ANOVA_coef	POS_Glass_delta	NEG_Glass_delta	X_ANOVA_pval	MSI_ANOVA_pval	Screen_Medium_PVAL	Mutation_group
497	266	-0.235511	0.427454	-0.662965	0.706388	0.747268	-0.919652	-0.681635	0.938527	0.887185	1.49775e-31	0.140016	0.902244	Homozygous
423	266	-0.220137	0.427454	-0.647591	0.717192	0.747268	-0.8884	-0.654578	0.902953	0.866611	1.12262e-27	0.259089	0.838709	Dom_DNA
430	266	-0.216063	0.427454	-0.643516	0.716658	0.747268	-0.883347	-0.650584	0.897941	0.861159	1.29736e-27	0.214967	0.83416	Missense
397	266	-0.231018	0.427454	-0.658472	0.722198	0.747268	-0.899119	-0.665779	0.91176	0.881172	1.49018e-27	0.283501	0.56279	transcriptional_inactive
262	266	-0.236876	0.427454	-0.66433	0.750529	0.747268	-0.887089	-0.668481	0.885149	0.889012	3.42091e-22	0.619559	0.838725	Myers_HNSCC_Binary
200	266	-0.212142	0.427454	-0.639595	0.7068	0.747268	-0.875934	-0.644284	0.904917	0.855912	4.25363e-19	0.306647	0.767165	Str_A_L2_or_L3
142	266	-0.253375	0.427454	-0.680829	0.701313	0.747268	-0.930558	-0.683692	0.970792	0.911091	1.93393e-17	0.843332	0.425048	Dom_HCD_IV.DNA_binding
129	266	-0.252352	0.427454	-0.679806	0.688	0.747268	-0.933166	-0.685094	0.98809	0.909722	1.43596e-16	0.892	0.509381	StrB_Loop_L3
123	266	-0.287151	0.427454	-0.714604	0.730607	0.747268	-0.963006	-0.712686	0.978097	0.95629	1.77409e-16	0.906394	0.633244	Dom_DNA_contact
108	266	-0.293996	0.427454	-0.72145	0.750723	0.747268	-0.964165	-0.715616	0.961006	0.96545	3.45838e-15	0.941209	0.647687	HS_Contact_248_or_273
113	266	-0.235228	0.427454	-0.662681	0.698201	0.747268	-0.904025	-0.675951	0.949126	0.886806	1.12422e-14	0.803503	0.25585	Str_A_NDBL_or_beta.sheets
121	266	-0.173502	0.427454	-0.600955	0.729471	0.747268	-0.810168	-0.602152	0.823824	0.804203	1.24601e-12	0.844183	0.476463	Str_A_L1_or_S_or_H2
60	266	-0.343359	0.427454	-0.770812	0.742242	0.747268	-1.03277	-0.773062	1.03849	1.03151	7.18717e-12	0.773882	0.599633	pos 248
75	266	-0.252067	0.427454	-0.679521	0.721401	0.747268	-0.916169	-0.688648	0.941947	0.909341	1.72151e-11	0.834457	0.361929	Nonsense
93	266	-0.203992	0.427454	-0.631445	0.738011	0.747268	-0.847699	-0.6313	0.855605	0.845005	1.9115e-11	0.889391	0.332581	StrB_Helix_H2
93	266	-0.203992	0.427454	-0.631445	0.738011	0.747268	-0.847699	-0.6313	0.855605	0.845005	1.9115e-11	0.889391	0.332581	Dom_HCD_V.DNA_binding
81	266	-0.219368	0.427454	-0.646821	0.664947	0.747268	-0.887263	-0.653904	0.972741	0.865581	1.95794e-11	0.551656	0.814122	Indel_Frameshift
141	266	-0.103041	0.427454	-0.530495	0.708135	0.747268	-0.722768	-0.522101	0.749143	0.709913	8.45246e-11	0.939686	0.437146	Heterozygous
76	266	-0.220506	0.427454	-0.64796	0.628595	0.747268	-0.896499	-0.652097	1.03081	0.867105	9.05076e-11	0.921814	0.465838	Splice_site
72	266	-0.228786	0.427454	-0.65624	0.770217	0.747268	-0.872456	-0.656809	0.85202	0.878185	3.31242e-10	0.933929	0.497968	StrB_Beta_Strand_S1
65	266	-0.212226	0.427454	-0.63968	0.762764	0.747268	-0.852557	-0.634638	0.838633	0.856025	4.47418e-09	0.88303	0.437055	StrB_Beta_Strand_S10
36	266	-0.326742	0.427454	-0.754196	0.78343	0.747268	-1.00349	-0.752068	0.962685	1.00927	6.50434e-08	0.834985	0.378802	R248Q
48	266	-0.232292	0.427454	-0.659746	0.764507	0.747268	-0.87979	-0.649045	0.862969	0.882878	1.36441e-07	0.897743	0.465348	pos 273
58	266	-0.146496	0.427454	-0.573949	0.781357	0.747268	-0.761797	-0.577227	0.734554	0.768063	3.16022e-07	0.204019	0.566681	StrB_Loop_L2
31	266	-0.320605	0.427454	-0.748058	0.794123	0.747268	-0.994539	-0.766634	0.941993	1.00106	3.31857e-07	0.731742	0.523815	Coding_Silent
54	266	-0.107618	0.427454	-0.535071	0.702717	0.747268	-0.723041	-0.527222	0.761432	0.716037	3.18916e-06	0.11286	0.377853	Dom_HCD_III.DNA_binding
15	266	-0.502616	0.427454	-0.930069	0.735964	0.747268	-1.24556	-0.943567	1.26374	1.24463	6.56159e-06	0.571751	0.446581	pos 220
22	266	-0.338748	0.427454	-0.766202	0.800657	0.747268	-1.01981	-0.774381	0.956967	1.02534	7.53117e-06	0.930845	0.544854	pos 245
21	266	-0.374068	0.427454	-0.801521	0.723703	0.747268	-1.07495	-0.790562	1.10753	1.0726	8.5097e-06	0.502618	0.541821	R248W
13	266	-0.51887	0.427454	-0.946323	0.76256	0.747268	-1.26525	-0.949015	1.24098	1.26638	1.29879e-05	0.675356	0.389637	R213X
40	266	-0.13271	0.427454	-0.560163	0.698656	0.747268	-0.755742	-0.560836	0.801773	0.749615	1.62553e-05	0.902257	0.548075	Dom_HCD_II.DNA_binding
16	266	-0.435206	0.427454	-0.86266	0.830462	0.747268	-1.14722	-0.880881	1.03877	1.15442	1.69723e-05	0.929588	0.541813	R273C
26	266	-0.217905	0.427454	-0.645359	0.687152	0.747268	-0.869431	-0.645778	0.93918	0.863625	3.44336e-05	0.712544	0.248951	R273H
28	266	-0.164734	0.427454	-0.592187	0.547637	0.747268	-0.809995	-0.602832	1.08135	0.79247	4.72238e-05	0.697222	0.289712	Zinc_binding_176_179_238_242
28	266	-0.164734	0.427454	-0.592187	0.547637	0.747268	-0.809995	-0.602832	1.08135	0.79247	4.72238e-05	0.697222	0.289712	Stabilize_L2.L3_region
13	266	-0.459966	0.427454	-0.88742	0.712583	0.747268	-1.18989	-0.892919	1.24536	1.18755	6.62262e-05	0.596506	0.429708	Y220C
31	266	-0.133824	0.427454	-0.561277	0.754961	0.747268	-0.750317	-0.567497	0.743453	0.751106	0.000127428	0.910514	0.517	StrB_Beta_Strand_S4
7	266	-0.622664	0.427454	-1.05012	1.01562	0.747268	-1.39228	-1.08019	1.03397	1.40528	0.000250346	0.682406	0.355163	pos 193
17	266	-0.274586	0.427454	-0.702039	0.893128	0.747268	-0.92822	-0.71041	0.786046	0.939475	0.000274975	0.725873	0.440591	G245S
20	266	-0.14991	0.427454	-0.577364	0.631681	0.747268	-0.780117	-0.578997	0.914011	0.772633	0.000913971	0.669524	0.375562	StrB_Beta_Strand_S2.
16	266	-0.200939	0.427454	-0.628392	0.5597	0.747268	-0.850986	-0.640608	1.12273	0.84092	0.000948351	0.671196	0.372896	StrB_Beta_Strand_S7
8	266	-0.35511	0.427454	-0.782563	0.915879	0.747268	-1.04053	-0.870335	0.854439	1.04723	0.00186266	0.438759	0.14285	PTM_ADP_Ribosylation
5	266	-0.622449	0.427454	-1.0499	0.272215	0.747268	-1.41414	-1.05569	3.85689	1.40499	0.00220435	0.64662	0.339046	R306X
26	266	-0.0336821	0.427454	-0.461136	0.758343	0.747268	-0.616303	-0.46492	0.608083	0.617096	0.00292602	0.710749	0.513711	R175H
10	266	-0.277423	0.427454	-0.704877	0.892366	0.747268	-0.93674	-0.700767	0.789896	0.943272	0.00431646	0.682083	0.330759	StrB_Beta_Strand_S9
8	266	-0.315175	0.427454	-0.742628	0.642421	0.747268	-0.997145	-0.764677	1.15598	0.993792	0.00476371	0.677045	0.312158	StrB_Helix_H4
8	266	-0.315175	0.427454	-0.742628	0.642421	0.747268	-0.997145	-0.764677	1.15598	0.993792	0.00476371	0.677045	0.312158	pos 282
3	266	-0.78812	0.427454	-1.21557	1.03128	0.747268	-1.62121	-1.23871	1.1787	1.62669	0.00497765	0.677997	0.375817	pos 147
4	266	-0.684648	0.427454	-1.1121	0.715759	0.747268	-1.48891	-1.09379	1.55374	1.48822	0.00531687	0.902456	0.446117	pos 161
4	266	-0.641661	0.427454	-1.06911	0.261577	0.747268	-1.43778	-1.05103	4.08719	1.4307	0.0056167	0.673393	0.368858	E285K
14	266	-0.176695	0.427454	-0.604149	0.819702	0.747268	-0.804662	-0.606138	0.737035	0.808477	0.00581239	0.910851	0.492329	StrB_Beta_Strand_S2
29	266	0.00946027	0.427454	-0.417993	0.81688	0.747268	-0.554222	-0.41168	0.511695	0.559362	0.00639362	0.387962	0.713794	pos 175
3	266	-0.708713	0.427454	-1.13617	0.549848	0.747268	-1.52305	-1.19512	2.06633	1.52043	0.00672954	0.676048	0.357252	G266V
3	266	-0.708713	0.427454	-1.13617	0.549848	0.747268	-1.52305	-1.19512	2.06633	1.52043	0.00672954	0.676048	0.357252	pos 266
10	266	-0.206194	0.427454	-0.633647	0.546342	0.747268	-0.85451	-0.645628	1.1598	0.847952	0.00755265	0.699127	0.392426	pos 179
12	266	-0.150128	0.427454	-0.577581	0.511315	0.747268	-0.781247	-0.586092	1.1296	0.772924	0.00807671	0.684661	0.401039	StrB_Helix_H1
11	266	-0.178754	0.427454	-0.606207	0.795198	0.747268	-0.809286	-0.617993	0.762335	0.811232	0.0081105	0.67852	0.347715	PTM_Ubiquitination
11	266	-0.178754	0.427454	-0.606207	0.795198	0.747268	-0.809286	-0.617993	0.762335	0.811232	0.0081105	0.67852	0.347715	pos 132
3	266	-0.674764	0.427454	-1.10222	0.361293	0.747268	-1.47925	-1.16117	3.05076	1.475	0.00836297	0.675425	0.355998	R248L
4	266	-0.570076	0.427454	-0.99753	1.3439	0.747268	-1.31852	-1.00463	0.742264	1.3349	0.00911961	0.684407	0.352572	H193R
3	266	-0.657154	0.427454	-1.08461	1.0981	0.747268	-1.44517	-1.14356	0.987714	1.45143	0.00991292	0.679286	0.363808	pos 159
8	266	-0.255517	0.427454	-0.68297	0.274399	0.747268	-0.924304	-0.689521	2.48897	0.913956	0.010145	0.669919	0.358926	pos 176
12	266	-0.184739	0.427454	-0.612193	0.837236	0.747268	-0.815106	-0.608861	0.731207	0.819242	0.0107623	0.911416	0.455586	T125T_silent_hotspot
3	266	-1.01132	0.427454	-1.43877	0.387095	0.747268	-1.93068	-1.28954	3.71685	1.92538	0.0111779	0.806156	0.40867	pos 173
5	266	-0.482228	0.427454	-0.909681	0.529126	0.747268	-1.22188	-0.900137	1.71921	1.21734	0.0117612	0.675301	0.351656	pos 241
17	266	-0.0217308	0.427454	-0.449184	0.598889	0.747268	-0.607319	-0.47444	0.750029	0.601102	0.0122669	0.535007	0.19758	transcriptional_active
5	266	-0.398035	0.427454	-0.825488	1.03614	0.747268	-1.09718	-0.860029	0.796693	1.10468	0.0126585	0.678988	0.394581	pos 110
6	266	-0.31849	0.427454	-0.745944	0.715885	0.747268	-0.998989	-0.774397	1.04199	0.998228	0.0130206	0.679553	0.294466	R282W
3	266	-0.665944	0.427454	-1.0934	1.2852	0.747268	-1.45258	-1.09691	0.850759	1.46319	0.0133763	0.707432	0.299964	R196X
5	266	-0.436107	0.427454	-0.863561	0.512425	0.747268	-1.1602	-0.841357	1.68524	1.15562	0.0134496	0.673407	0.379147	StrB_Helix_H7
5	266	-0.436107	0.427454	-0.863561	0.512425	0.747268	-1.1602	-0.841357	1.68524	1.15562	0.0134496	0.673407	0.379147	pos 285
4	266	-0.515591	0.427454	-0.943044	0.345042	0.747268	-1.26758	-0.964043	2.73313	1.26199	0.0136796	0.875845	0.451147	G245V
3	266	-0.619693	0.427454	-1.04715	0.972894	0.747268	-1.39767	-1.07105	1.07632	1.4013	0.0148815	0.678136	0.364421	K132N
3	266	-0.636835	0.427454	-1.06429	0.523012	0.747268	-1.42697	-1.05482	2.03492	1.42424	0.0159269	0.674486	0.38243	pos 275
4	266	-0.457689	0.427454	-0.885143	0.201627	0.747268	-1.1907	-0.891847	4.39	1.18451	0.0183513	0.673749	0.358364	P152L
4	266	-0.457689	0.427454	-0.885143	0.201627	0.747268	-1.1907	-0.891847	4.39	1.18451	0.0183513	0.673749	0.358364	pos 152
5	266	-0.319963	0.427454	-0.747417	0.450359	0.747268	-1.00497	-0.753802	1.6596	1.0002	0.0263225	0.702611	0.3451	pos 278
8	266	-0.170417	0.427454	-0.597871	0.380564	0.747268	-0.807811	-0.592564	1.57101	0.800075	0.0272282	0.669839	0.378831	pos 135
5	266	-0.293419	0.427454	-0.720873	0.556678	0.747268	-0.967886	-0.746738	1.29495	0.964678	0.0281131	0.711933	0.353558	pos 213
3	266	-0.492754	0.427454	-0.920208	0.359721	0.747268	-1.23499	-0.943692	2.55812	1.23143	0.0307638	0.674886	0.36425	K132R
7	266	-0.1563	0.427454	-0.583754	0.457382	0.747268	-0.786649	-0.615478	1.27629	0.781184	0.0323651	0.674674	0.31849	pos 237
23	266	0.0296502	0.427454	-0.397803	0.598213	0.747268	-0.539826	-0.348978	0.664986	0.532344	0.0371551	0.34577	0.45927	transcriptional_active_partially
4	266	-0.376362	0.427454	-0.803815	0.193674	0.747268	-1.08133	-0.785575	4.15035	1.07567	0.0377723	0.673343	0.366297	StrB_Beta_Strand_S3
3	266	-0.473256	0.427454	-0.900709	0.389886	0.747268	-1.20864	-0.905529	2.31019	1.20534	0.0389374	0.702865	0.339471	V216M
3	266	-0.473256	0.427454	-0.900709	0.389886	0.747268	-1.20864	-0.905529	2.31019	1.20534	0.0389374	0.702865	0.339471	pos 216
4	266	-0.334593	0.427454	-0.762047	0.420577	0.747268	-1.0237	-0.762967	1.81191	1.01978	0.0444614	0.651727	0.373671	pos 246
4	266	-0.342638	0.427454	-0.770091	1.05722	0.747268	-1.02481	-0.750405	0.728413	1.03054	0.04952	0.68027	0.356745	pos 267
3	266	-0.383317	0.427454	-0.81077	1.3334	0.747268	-1.07621	-0.86972	0.608046	1.08498	0.0501051	0.681305	0.367925	R110L
5	266	-0.206219	0.427454	-0.633673	0.494346	0.747268	-0.851554	-0.649561	1.28184	0.847986	0.055352	0.673229	0.378733	C135F
6	266	-0.151771	0.427454	-0.579224	0.661629	0.747268	-0.776678	-0.577692	0.875452	0.775123	0.0630878	0.706851	0.370397	H179R
3	266	-0.151061	0.427454	-0.578514	0.929998	0.747268	-0.772586	-0.857875	0.62206	0.774172	0.0670062	0.449969	0.178852	pos 259
6	266	-0.100487	0.427454	-0.527941	0.474206	0.747268	-0.710435	-0.554634	1.11331	0.706495	0.0732174	0.675728	0.314576	M237I
3	266	-0.363165	0.427454	-0.790618	0.674997	0.747268	-1.05874	-0.778805	1.17129	1.05801	0.0744654	0.678227	0.324658	pos 224
4	266	-0.212155	0.427454	-0.639609	0.357653	0.747268	-0.859647	-0.646228	1.78835	0.85593	0.0869766	0.673951	0.364525	pos 262
4	266	-0.205134	0.427454	-0.632587	0.60102	0.747268	-0.848212	-0.648844	1.05252	0.846534	0.087297	0.716501	0.346496	R213Q
4	266	-0.225569	0.427454	-0.653023	0.323951	0.747268	-0.877879	-0.634026	2.01581	0.87388	0.0933272	0.6743	0.355982	C176F
3	266	-0.277494	0.427454	-0.704948	0.475361	0.747268	-0.945477	-0.727409	1.48297	0.943367	0.0955915	0.674488	0.378886	H179Q
4	266	-0.145136	0.427454	-0.572589	1.13822	0.747268	-0.760645	-0.642682	0.503055	0.766244	0.0962972	0.714023	0.365401	R342X
10	266	0.00740758	0.427454	-0.420046	0.542045	0.747268	-0.566535	-0.395481	0.774929	0.562109	0.101932	0.672729	0.345375	pos 158
3	266	-0.282404	0.427454	-0.709858	1.28639	0.747268	-0.943028	-0.699136	0.551822	0.949937	0.112153	0.681075	0.361208	R267P
3	266	-0.272209	0.427454	-0.699663	0.921085	0.747268	-0.934479	-0.688245	0.759607	0.936295	0.115739	0.679123	0.337643	pos 255
3	266	-0.267794	0.427454	-0.695248	0.838419	0.747268	-0.929486	-0.684174	0.829237	0.930387	0.117589	0.678156	0.345397	Inframe_insertion
8	266	0.0139607	0.427454	-0.413493	0.736796	0.747268	-0.553538	-0.421465	0.561204	0.55334	0.118159	0.680356	0.2803	pos 242
7	266	0.0297721	0.427454	-0.397681	0.295839	0.747268	-0.537219	-0.457734	1.34425	0.532181	0.119387	0.743777	0.383783	pos 244
3	266	-0.192871	0.427454	-0.620324	0.486012	0.747268	-0.831923	-0.679274	1.27636	0.830123	0.121547	0.675808	0.35677	E336X
3	266	-0.294388	0.427454	-0.721841	0.126278	0.747268	-0.969508	-0.676536	5.71628	0.965974	0.121675	0.675008	0.35516	pos 143
3	266	-0.222571	0.427454	-0.650025	0.888351	0.747268	-0.868525	-0.670993	0.73172	0.869868	0.125608	0.675424	0.402775	pos 251
3	266	-0.243921	0.427454	-0.671374	0.466067	0.747268	-0.900502	-0.660112	1.44051	0.898439	0.129696	0.676651	0.33707	Q192X
5	266	-0.0557968	0.427454	-0.48325	0.38624	0.747268	-0.650242	-0.479879	1.25117	0.64669	0.155329	0.673277	0.363627	PTM_Ser_Phosphorylation
5	266	-0.0557968	0.427454	-0.48325	0.38624	0.747268	-0.650242	-0.479879	1.25117	0.64669	0.155329	0.673277	0.363627	pos 215
4	266	-0.0760523	0.427454	-0.503506	0.760684	0.747268	-0.673659	-0.562751	0.661912	0.673796	0.159097	0.816554	0.437725	Y163C
4	266	-0.0760523	0.427454	-0.503506	0.760684	0.747268	-0.673659	-0.562751	0.661912	0.673796	0.159097	0.816554	0.437725	pos 163
4	266	-0.0828295	0.427454	-0.510283	1.71667	0.747268	-0.667081	-0.517549	0.297252	0.682865	0.181899	0.690703	0.353929	pos 280
3	266	-0.263098	0.427454	-0.690552	0.338892	0.747268	-0.926864	-0.626242	2.03768	0.924102	0.188716	0.675434	0.360923	S241F
3	266	-0.13598	0.427454	-0.563433	0.277866	0.747268	-0.756436	-0.553203	2.02772	0.753991	0.203581	0.674788	0.362136	Dom_NES.transactivation_TAD1
13	266	0.161914	0.427454	-0.265539	0.830218	0.747268	-0.353557	-0.281639	0.319843	0.355347	0.209373	0.795044	0.429544	Inframe_deletion
3	266	-0.100602	0.427454	-0.528055	0.263566	0.747268	-0.708977	-0.543749	2.00351	0.706648	0.213628	0.650377	0.368274	E294X
3	266	-0.126416	0.427454	-0.55387	0.434347	0.747268	-0.743038	-0.535072	1.27518	0.741193	0.223315	0.646249	0.35725	StrB_Helix_H5
3	266	-0.126416	0.427454	-0.55387	0.434347	0.747268	-0.743038	-0.535072	1.27518	0.741193	0.223315	0.646249	0.35725	pos 283
4	266	-0.0351729	0.427454	-0.462626	0.983806	0.747268	-0.616565	-0.424267	0.470242	0.619091	0.268775	0.724876	0.360618	Dom_Oligomerization
4	266	0.110607	0.427454	-0.316846	0.463417	0.747268	-0.425475	-0.299983	0.683717	0.424007	0.426978	0.673234	0.387959	R158L
3	266	0.264644	0.427454	-0.16281	0.410339	0.747268	-0.218446	-0.36856	0.396769	0.217874	0.429129	0.601799	0.290564	E171K
3	266	0.264644	0.427454	-0.16281	0.410339	0.747268	-0.218446	-0.36856	0.396769	0.217874	0.429129	0.601799	0.290564	pos 171
5	266	0.156583	0.427454	-0.27087	0.79315	0.747268	-0.36214	-0.26794	0.341512	0.362481	0.430118	0.6754	0.395227	StrB_Loop_L1
8	266	0.240004	0.427454	-0.18745	0.230563	0.747268	-0.253819	-0.193976	0.813007	0.250847	0.466761	0.669554	0.359855	StrB_Beta_Strand_S8
5	266	0.239802	0.427454	-0.187651	0.226915	0.747268	-0.252829	-0.224779	0.826967	0.251117	0.506318	0.67284	0.358091	R249S
5	266	0.239802	0.427454	-0.187651	0.226915	0.747268	-0.252829	-0.224779	0.826967	0.251117	0.506318	0.67284	0.358091	pos 249
7	266	0.277234	0.427454	-0.150219	0.894186	0.747268	-0.20007	-0.187246	0.167995	0.201024	0.529262	0.844369	0.401979	V157F
7	266	0.277234	0.427454	-0.150219	0.894186	0.747268	-0.20007	-0.187246	0.167995	0.201024	0.529262	0.844369	0.401979	pos 157
3	266	0.164102	0.427454	-0.263351	0.502653	0.747268	-0.353144	-0.252862	0.523922	0.352419	0.561093	0.675768	0.356921	PTM_Acetylation.Ubiquitination
7	266	0.259754	0.427454	-0.1677	0.708017	0.747268	-0.224672	-0.166615	0.236858	0.224417	0.561571	0.679324	0.293246	pos 272
4	266	0.258357	0.427454	-0.169096	0.2044	0.747268	-0.227467	-0.200742	0.82728	0.226286	0.594652	0.673493	0.363996	Y236C
4	266	0.258357	0.427454	-0.169096	0.2044	0.747268	-0.227467	-0.200742	0.82728	0.226286	0.594652	0.673493	0.363996	pos 236
4	266	0.211938	0.427454	-0.215515	0.557018	0.747268	-0.289124	-0.194724	0.386908	0.288404	0.606013	0.676798	0.331468	R158H
4	266	0.221651	0.427454	-0.205803	0.285238	0.747268	-0.276733	-0.186937	0.721511	0.275407	0.619826	0.67407	0.357645	pos 234
3	266	0.201391	0.427454	-0.226062	0.811028	0.747268	-0.302317	-0.215252	0.278736	0.302519	0.624782	0.587907	0.36208	StrB_Alpha_Helix
4	266	0.330606	0.427454	-0.0968475	0.475415	0.747268	-0.130036	-0.194342	0.203711	0.129602	0.624888	0.789755	0.399111	C277F
4	266	0.330606	0.427454	-0.0968475	0.475415	0.747268	-0.130036	-0.194342	0.203711	0.129602	0.624888	0.789755	0.399111	pos 277
5	266	0.260259	0.427454	-0.167194	0.862243	0.747268	-0.223192	-0.16262	0.193906	0.223741	0.631924	0.681114	0.301618	V272M
4	266	0.284397	0.427454	-0.143056	0.854326	0.747268	-0.191111	-0.14908	0.167449	0.191439	0.694125	0.675254	0.406637	pos 113
3	266	0.254791	0.427454	-0.172662	0.912496	0.747268	-0.230635	-0.160363	0.18922	0.231058	0.713248	0.680203	0.314804	K319X
3	266	0.383361	0.427454	-0.0440929	1.38552	0.747268	-0.058474	0.165435	0.0318242	0.0590055	0.743341	0.227523	0.504231	R175_nonH
3	266	0.383361	0.427454	-0.0440929	1.38552	0.747268	-0.058474	0.165435	0.0318242	0.0590055	0.743341	0.227523	0.504231	R175L
3	266	0.316696	0.427454	-0.110758	0.48114	0.747268	-0.148543	-0.0997985	0.230199	0.148217	0.818455	0.676307	0.344894	K132Q
6	266	0.299145	0.427454	-0.128308	0.765434	0.747268	-0.171625	-0.0616308	0.167628	0.171703	0.848966	0.675936	0.357338	R273L
3	266	0.0540091	0.427454	-0.373444	0.560266	0.747268	-0.500568	-0.0818147	0.666548	0.499747	0.863558	0.674935	0.266598	pos 151
3	266	0.391232	0.427454	-0.0362215	0.575559	0.747268	-0.0485459	-0.0609655	0.0629327	0.0484719	0.888645	0.676533	0.348251	C242F

## Sheet: table S4D
Table S4D. Full list of ANOVA pan-cancer interactions between TF mutation classes and their corresponding activity in primary tumors
Mutation_group	POS	NEG	POS_Y_MEAN	NEG_Y_MEAN	deltaMEAN_Y	POS_Y_sd	NEG_Y_sd	X_effect_size	POS_Glass_delta	NEG_Glass_delta	X_ANOVA_pval	X_ANOVA_coef	AGE_ANOVA_pval	GENDER_PVAL	X_ANOVA_fdr	is_significant
TP53 missense	1991	4377	-0.143074	0.105233	-0.248307	0.715098	0.735716	-0.340458	0.347235	0.337504	5.95897e-36	-0.248736	0.503817	0.3505	5.52985e-33	TRUE
TP53 interface PPP1R13L	587	4377	-0.189341	0.105233	-0.294574	0.736573	0.735716	-0.400337	0.399926	0.400392	1.27999e-19	-0.29444	0.855889	0.85581	5.93906e-17	TRUE
TP53 truncating	800	4377	-0.150814	0.105233	-0.256048	0.730425	0.735716	-0.348411	0.350546	0.348025	2.11798e-19	-0.255973	0.76274	0.727665	6.55153e-17	TRUE
TP53 3D hotspot 97-287-1ycs	581	4377	-0.17859	0.105233	-0.283823	0.723179	0.735716	-0.386544	0.392466	0.385779	2.94308e-18	-0.283705	0.835146	0.987368	5.51485e-16	TRUE
TP53 interface TP53BP2	568	4377	-0.18159	0.105233	-0.286823	0.725198	0.735716	-0.390492	0.39551	0.389856	2.9714e-18	-0.286634	0.76867	0.942419	5.51485e-16	TRUE
TP53 3D hotspot 97-291-4a63	494	4377	-0.176888	0.105233	-0.282122	0.735432	0.735716	-0.383481	0.383614	0.383466	8.42878e-16	-0.282046	0.903614	0.848622	1.30363e-13	TRUE
TP53 3D hotspot 96-288-2mej	501	4377	-0.159996	0.105233	-0.265229	0.714265	0.735716	-0.361572	0.371332	0.360505	2.29293e-14	-0.265129	0.927067	0.773903	3.03974e-12	TRUE
TP53 3D hotspot 96-290-2mej	433	4377	-0.163448	0.105233	-0.268681	0.719354	0.735716	-0.365921	0.373503	0.365197	4.82321e-13	-0.268572	0.905588	0.887063	5.59485e-11	TRUE
TP53 interface BCL2	434	4377	-0.161738	0.105233	-0.266971	0.720976	0.735716	-0.363523	0.370292	0.362873	6.4912e-13	-0.266842	0.901964	0.90239	6.69306e-11	TRUE
TP53 interface BCL2L1	418	4377	-0.156123	0.105233	-0.261356	0.718914	0.735716	-0.35594	0.363543	0.355241	4.42837e-12	-0.261227	0.878549	0.815345	4.10948e-10	TRUE
TP53 hotspot S269	348	4377	-0.17683	0.105233	-0.282063	0.699502	0.735716	-0.384746	0.403234	0.383386	5.62415e-12	-0.282096	0.9769	0.773521	4.74467e-10	TRUE
NFE2L2 missense	175	6974	0.380574	0.0107031	0.369871	0.858199	0.745359	0.494276	0.430985	0.496232	3.30669e-11	0.381365	0.0101616	0.390453	2.55714e-09	TRUE
TP53 interface TP53	596	4377	-0.105428	0.105233	-0.210661	0.737736	0.735716	-0.286241	0.285551	0.286335	6.25706e-11	-0.210886	0.969855	0.733125	4.46652e-09	TRUE
NFE2L2 interface KEAP1 // NFE2L2 3D hotspot 69-84-4ifl	54	6974	0.616999	0.0107031	0.606296	0.744383	0.745359	0.813436	0.814494	0.813428	1.51476e-09	0.616224	0.00723812	0.47603	1.00405e-07	TRUE
NFE2L2 3D hotspot 69-84-2flu	54	6974	0.616999	0.0107031	0.606296	0.744383	0.745359	0.813436	0.814494	0.813428	1.51476e-09	0.616224	0.00723812	0.47603	1.00405e-07	TRUE
TP53 p.273	215	4377	-0.183194	0.105233	-0.288427	0.708485	0.735716	-0.392702	0.407105	0.392037	2.14338e-08	-0.288138	0.837226	0.551959	1.32602e-06	TRUE
TP53 3D hotspot 95-290-1gzh	333	4377	-0.122404	0.105233	-0.227638	0.762335	0.735716	-0.308609	0.298606	0.30941	6.33311e-08	-0.227621	0.70215	0.516347	3.67316e-06	TRUE
TP53 Stability uniprot = D	218	4377	-0.169379	0.105233	-0.274612	0.765195	0.735716	-0.37254	0.358879	0.373259	8.25989e-08	-0.274792	0.770526	0.360006	4.50887e-06	TRUE
TP53 p.R273C	105	4377	-0.275531	0.105233	-0.380764	0.716871	0.735716	-0.517846	0.531147	0.517542	1.89917e-07	-0.3799	0.878211	0.357412	9.79117e-06	TRUE
REST truncating	18	7047	0.651676	-0.0109079	0.662584	0.960337	0.542992	1.21713	0.689949	1.22024	2.74056e-07	0.661168	0.591362	0.30024	1.33853e-05	TRUE
TP53 interface TP53BP1 // TP53 3D hotspot 95-289-1kzy // TP53 3D hotspot 95-292-1gzh	353	4377	-0.102554	0.105233	-0.207787	0.751971	0.735716	-0.28196	0.276323	0.282429	3.48148e-07	-0.208436	0.900441	0.552037	1.61539e-05	TRUE
TP53 interaction disrupting NRDC	115	4377	-0.247593	0.105233	-0.352826	0.736801	0.735716	-0.479551	0.478862	0.479569	4.46541e-07	-0.352305	0.881626	0.373257	1.89119e-05	TRUE
NFE2L2 p.24	6	6974	1.51827	0.0107031	1.50756	0.219655	0.745359	2.02326	6.86331	2.0226	4.48349e-07	1.53782	0.0078336	0.535617	1.89119e-05	TRUE
TP53 p.248	155	4377	-0.194938	0.105233	-0.300172	0.724663	0.735716	-0.408206	0.414222	0.407999	6.31135e-07	-0.300084	0.704052	0.448717	2.54646e-05	TRUE
TP53 hotspot T155	173	4377	-0.171855	0.105233	-0.277088	0.72388	0.735716	-0.376852	0.382782	0.376624	9.31176e-07	-0.28062	0.959429	0.277098	3.6005e-05	TRUE
NFE2L2 p.79	20	6974	0.727797	0.0107031	0.717094	0.730794	0.745359	0.96213	0.981253	0.962079	1.1913e-05	0.731465	0.00819485	0.497149	0.000442206	TRUE
TP53 hotspot S106	64	4377	-0.286156	0.105233	-0.39139	0.708307	0.735716	-0.532261	0.552571	0.531985	2.28626e-05	-0.392655	0.75666	0.310769	0.000816007	TRUE
TP53 p.R248Q	85	4377	-0.223221	0.105233	-0.328454	0.737545	0.735716	-0.446421	0.445334	0.446442	4.32425e-05	-0.330055	0.722546	0.355537	0.00148624	TRUE
NFE2L2 p.E79Q	11	6974	0.884127	0.0107031	0.873424	0.522545	0.745359	1.17224	1.67148	1.17182	6.76363e-05	0.896698	0.0084638	0.52089	0.00224163	TRUE
NFE2L2 p.W24R	3	6974	1.64927	0.0107031	1.63857	0.21357	0.745359	2.19865	7.67227	2.19836	0.000112591	1.66271	0.00792714	0.540995	0.00360287	TRUE
HIF1A missense	52	7094	0.380181	0.0122605	0.36792	0.890221	0.701366	0.523436	0.413291	0.524577	0.00017377	0.367545	0.908239	0.622545	0.00537522	TRUE
TP53 p.175	118	4377	-0.14648	0.105233	-0.251713	0.730147	0.735716	-0.342201	0.344743	0.342134	0.000259344	-0.250921	0.832071	0.345461	0.00776349	TRUE
TP53 hotspot T150	108	4377	-0.150603	0.105233	-0.255836	0.667568	0.735716	-0.348473	0.383236	0.347738	0.000317147	-0.25788	0.814102	0.306858	0.00919714	TRUE
TP53 p.Y236C	15	4377	-0.567717	0.105233	-0.67295	0.531477	0.735716	-0.915386	1.26619	0.914688	0.000386596	-0.675502	0.737716	0.340736	0.0107582	TRUE
TP53 p.141	22	4377	-0.45338	0.105233	-0.558614	0.823457	0.735716	-0.758822	0.678377	0.759279	0.000394164	-0.558272	0.80437	0.391996	0.0107582	TRUE
TP53 p.F134L	3	4377	-1.38897	0.105233	-1.49421	0.514454	0.735716	-2.0312	2.90445	2.03096	0.00041956	-1.50026	0.792875	0.314489	0.0111242	TRUE
TP53 interaction ZNF385A loss	109	4377	-0.146657	0.105233	-0.251891	0.732244	0.735716	-0.342414	0.343998	0.342375	0.000442152	-0.250887	0.816841	0.360878	0.0113424	TRUE
TP53 hotspot T284	209	4377	-0.0777441	0.105233	-0.182977	0.710045	0.735716	-0.249095	0.257698	0.248707	0.000452236	-0.182793	0.776355	0.529161	0.0113424	TRUE
TP53 p.135	20	4377	-0.472373	0.105233	-0.577606	0.577395	0.735716	-0.785747	1.00036	0.785094	0.000465595	-0.577091	0.824869	0.310023	0.0113702	TRUE
TP53 interaction increasing VRK1 // TP53 p.R175H	108	4377	-0.145291	0.105233	-0.250525	0.735519	0.735716	-0.340521	0.34061	0.340518	0.00050705	-0.249423	0.817801	0.359102	0.012065	TRUE
TP53 p.337	26	4377	-0.39183	0.105233	-0.497064	0.628301	0.735716	-0.67614	0.791124	0.67562	0.000611737	-0.495893	0.714358	0.349128	0.0141921	TRUE
TP53 interaction disrupting BCL2L1	111	4377	-0.137845	0.105233	-0.243079	0.762377	0.735716	-0.330099	0.318843	0.330398	0.000643981	-0.24178	0.874576	0.369202	0.0144638	TRUE
TP53 p.236	16	4377	-0.519722	0.105233	-0.624956	0.548172	0.735716	-0.850099	1.14007	0.849453	0.000654622	-0.62811	0.735629	0.334739	0.0144638	TRUE
TP53 p.239	15	4377	-0.540365	0.105233	-0.645598	0.708293	0.735716	-0.877613	0.911484	0.877511	0.000722294	-0.643844	0.722613	0.364083	0.0155879	TRUE
NFE2L2 interface NFE2L2	11	6974	0.76163	0.0107031	0.750927	0.668285	0.745359	1.00761	1.12366	1.00747	0.0007469	0.758342	0.00826699	0.531107	0.0157526	TRUE
NFE2L2 p.81	11	6974	0.76163	0.0107031	0.750927	0.668285	0.745359	1.00761	1.12366	1.00747	0.0007469	0.758342	0.00826699	0.531107	0.0157526	TRUE
TP53 p.193	56	4377	-0.223336	0.105233	-0.328569	0.701397	0.735716	-0.446851	0.468449	0.446598	0.000928567	-0.327722	0.946609	0.377895	0.0187413	TRUE
NFE2L2 p.29	25	6974	0.497536	0.0107031	0.486833	0.633037	0.745359	0.653465	0.769044	0.653153	0.000929	0.494402	0.00777258	0.504434	0.0187413	TRUE
NFE2L2 p.W24C	3	6974	1.38726	0.0107031	1.37656	0.153363	0.745359	1.84709	8.97578	1.84684	0.0010344	1.41287	0.00789367	0.537729	0.0204237	TRUE
TP53 inframe indel	64	4377	-0.198662	0.105233	-0.303896	0.65789	0.735716	-0.41365	0.461925	0.413061	0.00109355	-0.302367	0.855843	0.384674	0.0211416	TRUE
TP53 p.C242F	11	4377	-0.608804	0.105233	-0.714037	0.734565	0.735716	-0.970537	0.972054	0.970534	0.00136257	-0.712048	0.774342	0.323728	0.025805	TRUE
AHR p.Q383H // AHR p.383	3	7076	1.39182	0.0154331	1.37638	0.556754	0.759348	1.8127	2.47216	1.81258	0.00158586	1.38483	0.00117599	0.169501	0.0294333	TRUE
TP53 interaction decreasing KMT2E // TP53 interaction disrupting DAXX // TP53 p.R248W	61	4377	-0.193787	0.105233	-0.29902	0.708703	0.735716	-0.406633	0.421926	0.406434	0.00174068	-0.297231	0.748761	0.372953	0.0312023	TRUE
HNF4A missense	81	7067	-0.150785	0.00625093	-0.157036	0.489635	0.452004	-0.347084	0.320721	0.347421	0.00174843	-0.15837	0.368652	0.651235	0.0312023	TRUE
TP53 p.150del	3	4377	-1.23404	0.105233	-1.33927	0.754864	0.735716	-1.82034	1.77418	1.82036	0.00179363	-1.32817	0.779165	0.322227	0.031405	TRUE
TP53 p.V11fs // TP53 p.V136fs // TP53 p.V143fs // TP53 p.V50fs	4	4377	-1.044	0.105233	-1.14924	0.24307	0.735716	-1.56254	4.72801	1.56207	0.0019003	-1.14348	0.784605	0.319863	0.0326566	TRUE
TP53 p.134	6	4377	-0.823792	0.105233	-0.929025	0.93733	0.735716	-1.2623	0.99114	1.26275	0.00198715	-0.930445	0.80527	0.349596	0.0329417	TRUE
TP53 p.242	20	4377	-0.40879	0.105233	-0.514024	0.781245	0.735716	-0.698479	0.657954	0.698672	0.00198789	-0.510697	0.754707	0.347764	0.0329417	TRUE
FOXA1 p.256del	3	7067	-1.30814	0.0285778	-1.33672	0.474285	0.748536	-1.78593	2.8184	1.78578	0.002272	-1.31938	0.00893272	0.206218	0.0369892	TRUE
SREBF2 truncating	27	7058	0.324114	-0.000480323	0.324595	0.838533	0.555699	0.582755	0.387098	0.584119	0.00242607	0.325962	0.655873	0.893981	0.0386063	TRUE
TP53 p.I195N	3	4377	-1.17614	0.105233	-1.28137	1.0667	0.735716	-1.74123	1.20125	1.74167	0.00246684	-1.2879	0.768813	0.336889	0.0386063	TRUE
NFE2L2 p.D29H	13	6974	0.63253	0.0107031	0.621827	0.724195	0.745359	0.834305	0.858645	0.834265	0.00249613	0.625673	0.00791039	0.500659	0.0386063	TRUE
STAT2 missense	54	7080	-0.326826	0.00670675	-0.333533	0.907658	0.830492	-0.401319	0.367465	0.401609	0.00276764	-0.339731	0.102716	0.00665361	0.0421039	TRUE
NFE2L2 hotspot S40	26	6974	0.431599	0.0107031	0.420896	0.706901	0.745359	0.56479	0.59541	0.564689	0.00303557	0.434278	0.00806025	0.563985	0.0454351	TRUE
TP53 p.R155fs // TP53 p.R248fs	3	4377	-1.13986	0.105233	-1.24509	0.340007	0.735716	-1.69266	3.66197	1.69236	0.00329376	-1.24944	0.785439	0.320642	0.0482476	TRUE
NFE2L2 p.34	25	6974	0.436124	0.0107031	0.42542	0.721093	0.745359	0.570822	0.589966	0.570759	0.00332747	0.438642	0.00808807	0.562433	0.0482476	TRUE
TP53 p.R158L	24	4377	-0.327826	0.105233	-0.433059	0.774942	0.735716	-0.588455	0.558828	0.588623	0.0035908	-0.43936	0.867864	0.272262	0.0512649	FALSE
TP53 p.S241F	11	4377	-0.538529	0.105233	-0.643762	0.845645	0.735716	-0.874695	0.761267	0.875015	0.0037347	-0.64477	0.860539	0.388571	0.0517359	FALSE
MYCN truncating	12	7102	0.644348	0.0125213	0.631827	1.11535	0.759301	0.831372	0.566482	0.832116	0.00373529	0.636636	0.0628944	0.00121956	0.0517359	FALSE
TP53 p.159	23	4377	-0.336826	0.105233	-0.44206	0.757854	0.735716	-0.600765	0.583304	0.600857	0.00387376	-0.444848	0.746324	0.328551	0.0528648	FALSE
TP53 p.282	64	4377	-0.157967	0.105233	-0.2632	0.629387	0.735716	-0.35843	0.418185	0.357747	0.00447422	-0.263205	0.723671	0.331627	0.0601321	FALSE
HIF1A interface ARNTL	9	7094	0.678066	0.0122605	0.665806	0.73127	0.701366	0.949252	0.910478	0.949298	0.00453589	0.664409	0.91296	0.67748	0.0601321	FALSE
TP53 p.R282W	62	4377	-0.161092	0.105233	-0.266325	0.639361	0.735716	-0.362605	0.416549	0.361994	0.00461378	-0.266454	0.720882	0.330931	0.0603032	FALSE
FOXM1 interface FOXO3	9	7088	0.534359	0.0110713	0.523287	0.417709	0.578136	0.905372	1.25276	0.905128	0.00530704	0.537084	0.023829	4.52405e-05	0.0684009	FALSE
GATA3 p.S407L	3	6972	1.12086	0.0233682	1.09749	0.592108	0.702129	1.56315	1.85353	1.56309	0.00564419	1.12258	0.171595	0.0507381	0.0717498	FALSE
TP53 p.105	15	4377	-0.418062	0.105233	-0.523295	0.431559	0.735716	-0.712019	1.21257	0.711273	0.0058192	-0.524778	0.793995	0.320578	0.072975	FALSE
TP53 p.173	24	4377	-0.310438	0.105233	-0.415671	0.538871	0.735716	-0.565675	0.771374	0.564989	0.00592305	-0.414215	0.808824	0.37951	0.0732869	FALSE
YBX1 missense	32	7128	0.382186	0.0126825	0.369503	0.773597	0.757062	0.488029	0.477643	0.488075	0.00601079	0.36871	0.710477	0.139145	0.0733939	FALSE
NFE2L2 p.L30F	5	6974	0.90816	0.0107031	0.897457	0.87667	0.745359	1.20393	1.02371	1.20406	0.00613357	0.914029	0.00856429	0.549407	0.0739204	FALSE
VDR interface NR1H2	4	7122	-0.990042	0.0033594	-0.993402	1.40298	0.723939	-1.37142	0.708064	1.37222	0.00660276	-0.984529	0.481349	0.0175545	0.0784832	FALSE
HNF1A truncating	31	7095	-0.241073	-0.000901775	-0.240172	0.459659	0.506109	-0.47472	0.522499	0.474545	0.00668131	-0.247133	0.013857	0.274433	0.0784832	FALSE
E2F1 truncating	6	7118	0.700408	0.0161861	0.684222	0.863293	0.635182	1.07689	0.792573	1.07721	0.00690151	0.700643	0.03504	0.000331552	0.0800564	FALSE
PRDM14 p.R505H	3	7061	-1.16245	0.0102834	-1.17273	0.405802	0.763806	-1.53553	2.88991	1.53538	0.00700663	-1.1896	0.125783	0.105059	0.0802724	FALSE
TP53 p.Y220C	53	4377	-0.168125	0.105233	-0.273358	0.612858	0.735716	-0.372224	0.446038	0.371554	0.00736819	-0.272126	0.740984	0.302162	0.0833853	FALSE
MYCN missense	50	7102	0.305313	0.0125213	0.292792	0.936544	0.759301	0.38492	0.31263	0.385607	0.0075913	0.28818	0.078751	0.00091036	0.0838217	FALSE
TP53 hotspot S215	132	4377	-0.0698171	0.105233	-0.175051	0.689517	0.735716	-0.238354	0.253874	0.237932	0.00765922	-0.17316	0.742564	0.240764	0.0838217	FALSE
SMAD4 p.D493N // SMAD4 p.493	3	6912	-1.14591	0.0115843	-1.1575	0.573694	0.747385	-1.54882	2.01762	1.54873	0.00767774	-1.14947	0.000109574	0.0551644	0.0838217	FALSE
SMAD4 p.D351G	4	6912	0.998366	0.0115843	0.986782	0.993802	0.747385	1.32009	0.992936	1.32031	0.00823728	0.986887	0.000119608	0.0583966	0.0888848	FALSE
TP53 p.241	23	4377	-0.300913	0.105233	-0.406146	0.764422	0.735716	-0.551933	0.531312	0.552043	0.0086244	-0.404431	0.910956	0.440712	0.0910363	FALSE
TP53 p.C176Y	17	4377	-0.367295	0.105233	-0.472529	0.654009	0.735716	-0.642516	0.722511	0.642271	0.00863287	-0.469657	0.815985	0.274779	0.0910363	FALSE
TP53 p.V73fs	10	4377	-0.495228	0.105233	-0.600461	0.61752	0.735716	-0.816407	0.972375	0.816159	0.00900288	-0.608947	0.797425	0.312484	0.0938715	FALSE
TP53 hotspot S149	71	4377	-0.122449	0.105233	-0.227682	0.599921	0.735716	-0.31029	0.37952	0.30947	0.00916766	-0.228884	0.785152	0.265708	0.0943038	FALSE
ERG hotspot S222	4	7087	1.0806	0.00340932	1.07719	0.618773	0.83359	1.29235	1.74084	1.29222	0.00929434	1.08521	0.818932	0.334546	0.0943038	FALSE
SMAD4 inframe indel	5	6912	0.873591	0.0115843	0.862006	1.59391	0.747385	1.15218	0.540812	1.15336	0.00934921	0.869099	0.000143152	0.0427902	0.0943038	FALSE
TP53 p.N239S	6	4377	-0.68192	0.105233	-0.787154	0.579105	0.735716	-1.07015	1.35926	1.06992	0.00953118	-0.779684	0.768329	0.334044	0.0951056	FALSE
TP53 p.C135W	3	4377	-0.98733	0.105233	-1.09256	0.227998	0.735716	-1.48534	4.792	1.48504	0.0098507	-1.09715	0.782315	0.325175	0.0962387	FALSE
YY1 truncating	7	7129	0.783035	0.00834251	0.774693	0.891599	0.796413	0.972623	0.86888	0.972727	0.00989276	0.776913	0.898257	0.00184327	0.0962387	FALSE
NFE2L2 p.G81V	3	6974	1.1042	0.0107031	1.0935	0.625693	0.745359	1.46714	1.74766	1.46707	0.0100509	1.1079	0.0081127	0.531947	0.0962387	FALSE
TP53 p.157	37	4377	-0.204628	0.105233	-0.309862	0.787517	0.735716	-0.42092	0.393467	0.421171	0.0100596	-0.31328	0.820886	0.36251	0.0962387	FALSE
TP53 p.R65fs	3	4377	-0.981368	0.105233	-1.0866	0.209904	0.735716	-1.47724	5.17665	1.47693	0.010309	-1.09045	0.781836	0.32196	0.0976183	FALSE
NFE2L2 inframe indel	7	6974	0.710613	0.0107031	0.69991	0.411632	0.745359	0.939305	1.70033	0.939024	0.0104964	0.721305	0.00822212	0.542721	0.0978937	FALSE
TP53 p.220	60	4377	-0.14056	0.105233	-0.245794	0.610167	0.735716	-0.334784	0.40283	0.334088	0.010549	-0.244205	0.733165	0.300571	0.0978937	FALSE
TP53 interface TP63	161	4377	-0.0441963	0.105233	-0.14943	0.666643	0.735716	-0.203752	0.224152	0.203108	0.0110063	-0.149871	0.7464	0.369559	0.101126	FALSE
TP53 hotspot S183	130	4377	-0.0599119	0.105233	-0.165145	0.667064	0.735716	-0.225043	0.24757	0.224469	0.0115257	-0.165102	0.745087	0.265123	0.10486	FALSE
NFE2L2 p.80	9	6974	0.628768	0.0107031	0.618064	0.876273	0.745359	0.829036	0.705333	0.829217	0.0123176	0.62232	0.00761912	0.522505	0.109507	FALSE
FOXA1 p.266	4	7067	-0.92424	0.0285778	-0.952817	1.41261	0.748536	-1.27222	0.674509	1.27291	0.0123351	-0.93726	0.0101837	0.184459	0.109507	FALSE
TP53 p.R337C	14	4377	-0.383678	0.105233	-0.488912	0.366365	0.735716	-0.66528	1.33449	0.664539	0.0126544	-0.490791	0.751752	0.330339	0.109507	FALSE
TP53 p.C141Y	11	4377	-0.449428	0.105233	-0.554662	0.865332	0.735716	-0.753579	0.640981	0.753908	0.0128413	-0.553213	0.709971	0.354766	0.109507	FALSE
TP53 p.195	31	4377	-0.226941	0.105233	-0.332174	0.815391	0.735716	-0.451147	0.40738	0.451498	0.0129135	-0.330201	0.835467	0.422159	0.109507	FALSE
PAX6 truncating	35	7072	-0.30394	0.00897475	-0.312914	0.774816	0.719822	-0.434546	0.403857	0.434711	0.0130209	-0.303141	0.0233625	0.257882	0.109507	FALSE
TCF4 p.596	3	7063	-1.10833	0.0263794	-1.13471	0.395287	0.787235	-1.44154	2.87061	1.44139	0.0130648	-1.12777	0.0011083	0.369652	0.109507	FALSE
CTCF p.K202fs	9	7006	0.624662	0.0102334	0.614429	0.66704	0.736315	0.83455	0.921127	0.834464	0.0130749	0.609599	0.653588	0.00148009	0.109507	FALSE
ATF3 missense	15	7145	0.507857	0.0036313	0.504226	0.785137	0.789571	0.638615	0.642214	0.638608	0.0130985	0.506552	0.987555	0.397882	0.109507	FALSE
NFKB1 truncating	8	7096	-0.633953	0.00912631	-0.643079	0.826259	0.753031	-0.853903	0.778302	0.853988	0.0140111	-0.654606	0.42754	0.00173557	0.116091	FALSE
TP53 p.151	21	4377	-0.291018	0.105233	-0.396252	0.436966	0.735716	-0.539388	0.906824	0.538593	0.0141499	-0.39449	0.801559	0.34083	0.116203	FALSE
TP53 p.C135Y	9	4377	-0.491029	0.105233	-0.596262	0.46271	0.735716	-0.810899	1.28863	0.810452	0.0148073	-0.598265	0.804726	0.314661	0.120535	FALSE
PAX6 p.P375fs // PAX6 p.P389fs	28	7072	-0.331641	0.00897475	-0.340616	0.832794	0.719822	-0.47289	0.409004	0.473195	0.0150919	-0.331608	0.0239408	0.245688	0.121784	FALSE
SREBF2 p.S432fs	14	7058	0.357921	-0.000480323	0.358402	0.962777	0.555699	0.643772	0.372258	0.644956	0.0156783	0.360125	0.635468	0.910807	0.125425	FALSE
GLI2 p.V595I // GLI2 p.595	3	6958	-1.06196	0.00379928	-1.06576	0.221	0.750861	-1.41957	4.82246	1.41939	0.0162069	-1.04212	0.00119001	0.873906	0.128545	FALSE
E2F1 missense	37	7118	0.262221	0.0161861	0.246035	0.807688	0.635182	0.386746	0.304616	0.387345	0.016414	0.251552	0.0339893	0.000363188	0.129085	FALSE
HNF1A p.P172fs // HNF1A p.P289fs	6	7095	-0.475971	-0.000901775	-0.475069	0.194166	0.506109	-0.938951	2.44671	0.938669	0.0167298	-0.494633	0.0138696	0.247963	0.130463	FALSE
ZNF423 missense	211	6936	-0.116812	-0.00236767	-0.114444	0.731614	0.653417	-0.174498	0.156427	0.175147	0.0172003	-0.10937	0.0708424	0.432196	0.133014	FALSE
IRF2 p.84	4	7091	1.01118	-0.00430746	1.01549	1.61285	0.840498	1.20751	0.629624	1.2082	0.0177677	0.997332	0.0481414	0.240424	0.136266	FALSE
TP53 p.72	3	4377	-0.904012	0.105233	-1.00925	1.12699	0.735716	-1.37137	0.895524	1.37179	0.0180347	-1.00573	0.802106	0.3465	0.13718	FALSE
TP53 p.109	11	4377	-0.41984	0.105233	-0.525074	0.68501	0.735716	-0.7138	0.76652	0.713691	0.018344	-0.52423	0.785421	0.316557	0.138398	FALSE
PRDM14 p.S525C // PRDM14 p.525	3	7061	-1.02688	0.0102834	-1.03716	0.538482	0.763806	-1.35798	1.92609	1.35789	0.0185424	-1.0386	0.121364	0.105818	0.138767	FALSE
HNF4A truncating	9	7067	-0.345228	0.00625093	-0.351479	0.788709	0.452004	-0.776704	0.445638	0.777602	0.0189982	-0.354239	0.369666	0.682411	0.141041	FALSE
TP53 p.H179R	31	4377	-0.204858	0.105233	-0.310092	0.509908	0.735716	-0.422231	0.608133	0.421483	0.0192422	-0.310018	0.76993	0.355936	0.141718	FALSE
TP53 p.E286K	14	4377	-0.355473	0.105233	-0.460706	0.413454	0.735716	-0.626837	1.11429	0.626202	0.0197643	-0.458853	0.765347	0.337571	0.144417	FALSE
STAT2 p.K486fs // STAT2 p.K490fs	18	7080	-0.452038	0.00670675	-0.458744	0.924988	0.830492	-0.552217	0.495946	0.552377	0.0202783	-0.454972	0.0949331	0.00507794	0.147016	FALSE
TCF12 missense	59	7074	0.21998	0.0029203	0.21706	0.580917	0.680525	0.319312	0.37365	0.318959	0.0206511	0.205638	0.000246467	0.0590468	0.148558	FALSE
TP53 p.P151S	9	4377	-0.461576	0.105233	-0.566809	0.371906	0.735716	-0.770943	1.52407	0.770419	0.0208208	-0.567357	0.794811	0.31634	0.148627	FALSE
FOXA1 p.H247Y	3	7067	1.03015	0.0285778	1.00157	0.670364	0.748536	1.33808	1.49407	1.33804	0.0209844	0.997494	0.00829292	0.19972	0.148651	FALSE
HIF1A interface CREBBP	4	7094	0.81686	0.0122605	0.8046	1.18559	0.701366	1.14674	0.67865	1.14719	0.0215467	0.806868	0.852859	0.683034	0.150458	FALSE
CDX2 missense	22	7128	-0.270881	0.0194351	-0.290316	0.742383	0.600063	-0.483432	0.391059	0.483808	0.0215743	-0.29454	0.196033	0.000736834	0.150458	FALSE
MYCN p.T43fs	7	7102	0.642625	0.0125213	0.630104	0.906718	0.759301	0.829697	0.694928	0.829846	0.021876	0.658348	0.0564104	0.00119343	0.150458	FALSE
TP53 p.H178fs // TP53 p.H46fs // TP53 p.H85fs	8	4377	-0.490952	0.105233	-0.596185	0.493389	0.735716	-0.810703	1.20835	0.810347	0.021888	-0.597183	0.786729	0.333638	0.150458	FALSE
TP53 p.F109C	5	4377	-0.64668	0.105233	-0.751913	0.524856	0.735716	-1.02224	1.43261	1.02202	0.0226808	-0.750379	0.795666	0.310046	0.154761	FALSE
TP53 p.281	17	4377	-0.307243	0.105233	-0.412476	0.725581	0.735716	-0.560674	0.568477	0.560646	0.022883	-0.407194	0.784768	0.37495	0.154907	FALSE
TP53 p.249	39	4377	-0.162253	0.105233	-0.267486	0.836108	0.735716	-0.363117	0.319918	0.363573	0.023036	-0.269461	0.816504	0.259692	0.154907	FALSE
RUNX1 p.174	3	7043	-1.07316	-0.0106132	-1.06254	0.380821	0.80282	-1.32366	2.79014	1.32351	0.0234626	-1.0508	0.190796	0.912131	0.15664	FALSE
TP53 p.267	13	4377	-0.350461	0.105233	-0.455694	0.655152	0.735716	-0.619564	0.695555	0.619389	0.0238116	-0.46227	0.857745	0.36344	0.157835	FALSE
GATA3 truncating	107	6972	0.193622	0.0233682	0.170254	0.699781	0.702129	0.242494	0.243296	0.242482	0.0240426	0.155025	0.100128	0.0548747	0.158236	FALSE
TP53 p.N239D	9	4377	-0.445995	0.105233	-0.551228	0.802054	0.735716	-0.749112	0.687271	0.74924	0.0243421	-0.553141	0.741778	0.358877	0.159078	FALSE
TP53 p.V173M	12	4377	-0.369501	0.105233	-0.474735	0.537781	0.735716	-0.645646	0.882766	0.645269	0.0248998	-0.476992	0.774229	0.338824	0.160866	FALSE
TP53 p.C238Y	11	4377	-0.395746	0.105233	-0.500979	0.558103	0.735716	-0.681272	0.897647	0.680942	0.0249622	-0.497991	0.756967	0.319644	0.160866	FALSE
ZEB1 p.124 // ZEB1 p.140	3	6972	-0.81585	-0.00278721	-0.813063	0.509945	0.625483	-1.29996	1.59441	1.2999	0.0251829	-0.808755	0.875865	0.0690202	0.161169	FALSE
ATF4 truncating	18	7102	0.422832	-0.0191349	0.441967	0.937548	0.82778	0.533738	0.471407	0.533918	0.0263351	0.433927	0.0455723	0.00903727	0.164966	FALSE
PPARG interface NCOR2	4	7105	-0.822569	0.0141343	-0.836703	0.751322	0.750058	-1.11552	1.11364	1.11552	0.0263981	-0.833134	0.419405	0.238363	0.164966	FALSE
TP53 p.C275Y	7	4377	-0.50729	0.105233	-0.612524	0.699824	0.735716	-0.832609	0.875254	0.832555	0.0264834	-0.618376	0.804805	0.348627	0.164966	FALSE
CDC5L missense	66	7067	-0.254413	0.0109805	-0.265394	0.943961	0.927196	-0.286185	0.281149	0.286233	0.0264997	-0.254118	9.99549e-06	0.00255542	0.164966	FALSE
TP53 p.V157F	31	4377	-0.184808	0.105233	-0.290041	0.820319	0.735716	-0.393904	0.353571	0.39423	0.0267608	-0.294363	0.806955	0.358497	0.164966	FALSE
TP53 p.238	26	4377	-0.219388	0.105233	-0.324621	0.672638	0.735716	-0.441437	0.482609	0.441232	0.0268429	-0.320497	0.805131	0.318757	0.164966	FALSE
ZNF423 truncating	14	6936	-0.400574	-0.00236767	-0.398206	0.689957	0.653417	-0.609355	0.577146	0.609421	0.0270595	-0.386685	0.0638102	0.292999	0.165203	FALSE
TP53 p.176	41	4377	-0.149561	0.105233	-0.254794	0.784554	0.735716	-0.346106	0.324763	0.346321	0.0272515	-0.255136	0.784534	0.256226	0.165288	FALSE
SREBF1 hotspot S117	5	7093	-0.678008	0.010322	-0.68833	1.02703	0.702052	-0.980139	0.670217	0.980454	0.027467	-0.693114	0.803346	0.232318	0.165513	FALSE
MYC p.22del // MYC p.33del // MYC p.47del // MYC p.48del	3	7143	-0.929485	0.00807158	-0.937557	0.694451	0.734874	-1.27583	1.35007	1.27581	0.0282994	-0.930455	0.0556169	0.00399922	0.169429	FALSE
TP53 p.R273L	20	4377	-0.250103	0.105233	-0.355336	0.676202	0.735716	-0.483143	0.525488	0.482981	0.0291726	-0.359854	0.779926	0.356825	0.172152	FALSE
TP53 p.181	7	4377	0.712775	0.105233	0.607542	0.475871	0.735716	0.826112	1.27669	0.825783	0.0292082	0.607019	0.748619	0.313476	0.172152	FALSE
TP53 p.H193L	11	4377	-0.373489	0.105233	-0.478723	0.781483	0.735716	-0.650595	0.612582	0.65069	0.0293107	-0.484509	0.780331	0.362108	0.172152	FALSE
TP53 p.270	11	4377	-0.375742	0.105233	-0.480976	0.476459	0.735716	-0.654185	1.00948	0.653752	0.0295694	-0.483186	0.750449	0.335836	0.172579	FALSE
SMAD4 p.L229fs	4	6912	-0.817818	0.0115843	-0.829402	0.584268	0.747385	-1.10983	1.41956	1.10974	0.0299182	-0.810865	0.000113186	0.0530833	0.173523	FALSE
TP53 p.A159P	9	4377	-0.424619	0.105233	-0.529852	0.723978	0.735716	-0.720207	0.731863	0.720186	0.0305941	-0.531072	0.727447	0.359893	0.175821	FALSE
TP53 p.111del	3	4377	-0.826839	0.105233	-0.932072	1.33652	0.735716	-1.26623	0.697387	1.26689	0.0306933	-0.919593	0.794464	0.323021	0.175821	FALSE
FOXM1 missense	54	7088	0.178591	0.0110713	0.16752	0.595784	0.578136	0.289691	0.281175	0.289758	0.0320556	0.169224	0.0165162	2.51139e-05	0.182498	FALSE
IKZF1 truncating	7	7068	-0.638862	0.00703222	-0.645894	0.88934	0.802483	-0.804792	0.726263	0.80487	0.0328128	-0.647816	0.942186	0.0543635	0.185034	FALSE
TP53 p.275	17	4377	-0.273981	0.105233	-0.379214	0.771355	0.735716	-0.515343	0.49162	0.515436	0.0328998	-0.381796	0.812236	0.381873	0.185034	FALSE
TP53 p.R249M	6	4377	-0.529635	0.105233	-0.634869	0.56026	0.735716	-0.863134	1.13317	0.862927	0.0336413	-0.638687	0.782307	0.325	0.188065	FALSE
NFE2L2 p.82	12	6974	0.449957	0.0107031	0.439254	0.805645	0.745359	0.589241	0.54522	0.589319	0.0341909	0.45623	0.00667623	0.537851	0.189992	FALSE
ATF1 truncating	5	7133	0.713871	0.01827	0.695601	0.831391	0.763726	0.910752	0.836671	0.910799	0.0344251	0.721522	4.71054e-06	0.00215649	0.190155	FALSE
TP53 p.R181H	3	4377	1.00738	0.105233	0.902146	0.523971	0.735716	1.22635	1.72175	1.22622	0.0347655	0.897348	0.760846	0.313081	0.190899	FALSE
SREBF2 inframe indel // SREBF2 p.69del	7	7058	-0.443548	-0.000480323	-0.443068	0.523441	0.555699	-0.797354	0.846453	0.797315	0.0351034	-0.442924	0.63576	0.931556	0.191621	FALSE
TP53 p.H193R	26	4377	-0.202577	0.105233	-0.30781	0.657542	0.735716	-0.418622	0.468123	0.418382	0.0356592	-0.304062	0.884643	0.30542	0.193516	FALSE
TP53 p.179	57	4377	-0.0997896	0.105233	-0.205023	0.581124	0.735716	-0.279336	0.352804	0.278672	0.036086	-0.205206	0.745311	0.390185	0.194325	FALSE
GATA3 p.N333fs // GATA3 p.N334fs	10	6972	0.511022	0.0233682	0.487654	0.633349	0.702129	0.69462	0.769961	0.694536	0.036227	0.465651	0.172523	0.0507039	0.194325	FALSE
HIF1A hotspot S692	3	7094	0.854635	0.0122605	0.842375	0.943523	0.701366	1.20091	0.892797	1.20105	0.037474	0.84307	0.86708	0.73752	0.199724	FALSE
HIF1A hotspot S696	3	7094	0.854635	0.0122605	0.842375	0.943523	0.701366	1.20091	0.892797	1.20105	0.037474	0.84307	0.86708	0.73752	0.199724	FALSE
PPARG missense	47	7105	-0.213675	0.0141343	-0.227809	0.743932	0.750058	-0.303738	0.306223	0.303722	0.037758	-0.228069	0.394685	0.219908	0.199724	FALSE
IRF2 missense	57	7091	0.238986	-0.00430746	0.243294	1.03666	0.840498	0.288874	0.234691	0.289464	0.0378792	0.232729	0.0501836	0.172154	0.199724	FALSE
PRDM14 missense	91	7061	-0.15022	0.0102834	-0.160504	0.855903	0.763806	-0.209799	0.187525	0.210136	0.0393362	-0.166473	0.122477	0.0862874	0.206134	FALSE
TP53 p.158	46	4377	-0.116275	0.105233	-0.221509	0.817333	0.735716	-0.300721	0.271014	0.301079	0.0395944	-0.224939	0.903123	0.286698	0.206134	FALSE
TP53 PTM ubiquitination loss	40	4377	-0.138086	0.105233	-0.24332	0.679447	0.735716	-0.33094	0.358114	0.330725	0.0397959	-0.240255	0.774667	0.299671	0.206134	FALSE
TP53 p.D281Y	7	4377	-0.470387	0.105233	-0.57562	0.753852	0.735716	-0.782368	0.763572	0.782395	0.0400784	-0.571658	0.815955	0.363846	0.206134	FALSE
YY1 missense	20	7129	0.378683	0.00834251	0.370341	0.747018	0.796413	0.465085	0.495759	0.465011	0.0402055	0.365746	0.863902	0.00198828	0.206134	FALSE
FOXA1 truncating	15	7067	0.40736	0.0285778	0.378782	0.479075	0.748536	0.506326	0.790654	0.50603	0.0405525	0.396145	0.00849902	0.205152	0.206749	FALSE
PPARD interface NCOR2	8	7115	-0.483064	-0.00332431	-0.47974	0.99641	0.68935	-0.695559	0.481468	0.695931	0.040771	-0.498794	0.0611574	2.75728e-05	0.206749	FALSE
FOXA1 inframe indel	12	7067	-0.430834	0.0285778	-0.459411	1.1523	0.748536	-0.613094	0.39869	0.613746	0.041248	-0.442068	0.00985387	0.203741	0.20803	FALSE
NRF1 truncating	5	7114	-0.721519	-0.00816403	-0.713355	0.808367	0.786093	-0.907453	0.882464	0.907468	0.0419302	-0.713956	0.00310932	3.00973e-07	0.210328	FALSE
PRDM14 p.505	4	7061	-0.750828	0.0102834	-0.761111	0.887415	0.763806	-0.996397	0.857672	0.996471	0.0427606	-0.77423	0.124584	0.110713	0.212986	FALSE
NFE2L2 p.R34G	12	6974	0.432759	0.0107031	0.422056	0.744627	0.745359	0.566246	0.566802	0.566245	0.0429191	0.435999	0.00707326	0.544971	0.212986	FALSE
TCF4 interface TWIST2	3	7063	-0.898658	0.0263794	-0.925037	0.664058	0.787235	-1.17509	1.39301	1.17505	0.0438327	-0.91588	0.00104383	0.358179	0.216363	FALSE
TP53 p.S106R	4	4377	-0.629448	0.105233	-0.734682	0.660413	0.735716	-0.998661	1.11246	0.998594	0.0446171	-0.739492	0.777181	0.317325	0.218347	FALSE
BACH1 p.240	3	7077	0.891064	0.0227975	0.868266	1.19388	0.755907	1.1484	0.727265	1.14864	0.0448747	0.876005	0.036132	0.874582	0.218347	FALSE
TP53 p.P128fs // TP53 p.P35fs	4	4377	-0.632177	0.105233	-0.737411	1.42629	0.735716	-1.00136	0.517014	1.0023	0.0449578	-0.738913	0.718419	0.319101	0.218347	FALSE
CDC5L p.L235V // CDC5L p.235	3	7067	-1.0963	0.0109805	-1.10728	0.636734	0.927196	-1.19431	1.739	1.19422	0.0451759	-1.07084	1.16121e-05	0.00470821	0.218347	FALSE
TP53 p.P146fs // TP53 p.P278fs	3	4377	-0.739496	0.105233	-0.84473	0.816004	0.735716	-1.14811	1.0352	1.14817	0.0457965	-0.849087	0.761577	0.328337	0.219384	FALSE
E2F7 missense	85	7053	0.150368	0.0124744	0.137894	0.637762	0.626168	0.22017	0.216215	0.220218	0.0458632	0.136472	0.0210481	0.00254285	0.219384	FALSE
TCF4 interface ASCL1 // TCF4 interface NEUROG1	5	7063	-0.681494	0.0263794	-0.707874	0.596161	0.787235	-0.899298	1.18739	0.89919	0.0466426	-0.700262	0.00100915	0.355692	0.221968	FALSE
CREB1 missense	17	7138	0.41946	0.013931	0.405529	1.11642	0.860365	0.470985	0.363241	0.471345	0.0471926	0.414883	0.0126205	0.133079	0.223439	FALSE
ZNF263 p.R538I // ZNF263 p.538	3	7107	0.925333	0.005786	0.919547	0.646215	0.790342	1.16353	1.42297	1.16348	0.0476053	0.904312	0.507004	0.0184624	0.22425	FALSE
TP53 p.A159V	14	4377	-0.280388	0.105233	-0.385621	0.800405	0.735716	-0.524002	0.481783	0.524144	0.0479416	-0.390034	0.798555	0.295561	0.224693	FALSE
TP53 p.K132fs // TP53 p.K139fs // TP53 p.K46fs // TP53 p.K7fs	3	4377	-0.716045	0.105233	-0.821279	0.167214	0.735716	-1.11654	4.91154	1.1163	0.0497178	-0.834387	0.788101	0.322442	0.231847	FALSE
TP53 p.G245D	16	4377	-0.255958	0.105233	-0.361192	0.613415	0.735716	-0.491195	0.588821	0.490939	0.0508776	-0.359778	0.788409	0.359563	0.235025	FALSE
ZNF263 p.R510I // ZNF263 p.510	4	7107	0.79659	0.005786	0.790804	0.812994	0.790342	1.00057	0.972706	1.00059	0.0509059	0.772066	0.514186	0.0177729	0.235025	FALSE
NFE2L2 p.31	9	6974	0.474499	0.0107031	0.463796	0.936865	0.745359	0.622038	0.495051	0.622245	0.0514102	0.484643	0.00919637	0.512854	0.236178	FALSE
HNF4A interface NRIP1	3	7067	0.513254	0.00625093	0.507003	0.296371	0.452004	1.12177	1.7107	1.12168	0.0520288	0.507364	0.340811	0.672647	0.237234	FALSE
TFAP2A p.E311K // TFAP2A p.311	3	7104	0.93073	-0.0147411	0.945471	0.628602	0.851241	1.11077	1.50408	1.1107	0.0521513	0.954498	0.177259	0.0666216	0.237234	FALSE
MAX truncating	3	7127	0.853312	0.00446329	0.848849	0.193295	0.773813	1.09711	4.39147	1.09697	0.0525049	0.865824	0.287811	0.000307618	0.237677	FALSE
PRDM14 p.122	3	7061	0.8807	0.0102834	0.870416	0.580276	0.763806	1.13965	1.5	1.13958	0.0527692	0.854344	0.122703	0.100918	0.237715	FALSE
MYCN p.398	3	7102	0.851462	0.0125213	0.83894	0.618685	0.759301	1.10494	1.35601	1.10488	0.0537889	0.845197	0.0482808	0.00124616	0.240442	FALSE
NFE2L2 p.30	9	6974	0.471288	0.0107031	0.460585	1.22244	0.745359	0.617339	0.376776	0.617937	0.0538929	0.479802	0.00733573	0.573008	0.240442	FALSE
TP53 p.213	12	4377	-0.308821	0.105233	-0.414054	0.428847	0.735716	-0.563257	0.965505	0.562791	0.0543908	-0.409191	0.784819	0.321778	0.24049	FALSE
HIF1A hotspot S687	5	7094	0.615865	0.0122605	0.603604	0.801899	0.701366	0.860538	0.752718	0.860612	0.054422	0.603796	0.862808	0.729913	0.24049	FALSE
TP53 p.R337L	7	4377	-0.428599	0.105233	-0.533832	1.08443	0.735716	-0.725014	0.49227	0.725595	0.0554543	-0.533676	0.750662	0.340145	0.24389	FALSE
ELF1 truncating	15	7086	0.36334	0.00249308	0.360847	0.748016	0.716392	0.503655	0.482405	0.5037	0.0558978	0.354155	0.292587	0.0700634	0.244546	FALSE
FOXF2 missense	31	7127	-0.280781	0.0167391	-0.29752	0.81266	0.828414	-0.359172	0.366106	0.359144	0.05639	-0.284377	0.140067	0.000270256	0.244546	FALSE
STAT3 interface STAT2	7	7070	0.520262	0.00858331	0.511679	0.851436	0.722323	0.708263	0.60096	0.70838	0.0564816	0.521051	0.459045	0.0196721	0.244546	FALSE
GLI2 p.P63Q	3	6958	0.835756	0.00379928	0.831956	0.487457	0.750861	1.1081	1.70673	1.108	0.0566573	0.826015	0.00132557	0.863954	0.244546	FALSE
RXRA missense	47	7108	-0.184154	-0.00480923	-0.179344	0.648297	0.656272	-0.273299	0.276639	0.273277	0.058247	-0.182275	0.508358	0.160313	0.250243	FALSE
E2F7 p.P814S // E2F7 p.814	3	7053	0.716868	0.0124744	0.704393	0.333282	0.626168	1.12504	2.1135	1.12493	0.0587917	0.682992	0.0302163	0.00300522	0.251419	FALSE
VDR missense	37	7122	-0.22268	0.0033594	-0.22604	0.857619	0.723939	-0.311919	0.263566	0.312235	0.0591158	-0.225424	0.440974	0.014806	0.251645	FALSE
CTCF p.284	3	7006	0.833999	0.0102334	0.823766	0.943653	0.736315	1.11867	0.872954	1.11877	0.0596959	0.800748	0.648558	0.00144211	0.252955	FALSE
EBF1 interface EBF1	5	7063	0.610708	-0.00307619	0.613784	0.551392	0.709891	0.864715	1.11315	0.864618	0.0614073	0.593998	0.0206541	0.0733615	0.258371	FALSE
TP53 p.R175G	6	4377	-0.452857	0.105233	-0.55809	0.77746	0.735716	-0.758518	0.717838	0.758568	0.061531	-0.562248	0.799312	0.31088	0.258371	FALSE
STAT2 truncating	29	7080	-0.287761	0.00670675	-0.294467	1.08445	0.830492	-0.354078	0.271536	0.35457	0.0619176	-0.288955	0.0984428	0.00631358	0.258823	FALSE
SMAD4 p.386	5	6912	0.625537	0.0115843	0.613953	0.859365	0.747385	0.821391	0.714425	0.821468	0.0623492	0.6226	0.000115887	0.0542917	0.259459	FALSE
TP53 p.V173L	10	4377	-0.331673	0.105233	-0.436906	0.487507	0.735716	-0.594194	0.896205	0.593852	0.0636635	-0.432046	0.805079	0.350995	0.263745	FALSE
RUNX2 p.466	3	7074	-0.760044	0.00588739	-0.765931	1.03982	0.71648	-1.06885	0.736601	1.06902	0.0647684	-0.763798	0.000173889	0.109783	0.266056	FALSE
GATA3 p.407	4	6972	0.658098	0.0233682	0.63473	1.04418	0.702129	0.903772	0.607873	0.904007	0.0648172	0.648626	0.178333	0.0566776	0.266056	FALSE
TP53 p.R116fs	11	4377	-0.306352	0.105233	-0.411585	0.939999	0.735716	-0.559032	0.437857	0.559435	0.0650815	-0.410223	0.780919	0.358295	0.266056	FALSE
TP53 p.V110fs // TP53 p.V203fs // TP53 p.V71fs	3	4377	0.887479	0.105233	0.782245	0.059463	0.735716	1.06349	13.1552	1.06324	0.0667566	0.779176	0.782775	0.323714	0.267942	FALSE
ARNT missense	49	7096	-0.197747	0.0112526	-0.209	0.833734	0.753662	-0.277104	0.250679	0.277312	0.0668407	-0.198129	0.00306591	0.0487636	0.267942	FALSE
SMAD3 interface SMAD3	21	7093	0.35354	0.0178004	0.335739	0.771104	0.833442	0.402916	0.435401	0.402835	0.0673049	0.332583	0.000132168	0.000160607	0.267942	FALSE
TP53 p.R213L	5	4377	-0.505327	0.105233	-0.61056	0.584008	0.735716	-0.830026	1.04547	0.829886	0.0675984	-0.602141	0.777904	0.328689	0.267942	FALSE
E2F4 missense	22	7129	0.266001	0.0135014	0.2525	0.708944	0.690162	0.365826	0.356163	0.365856	0.0683519	0.268298	0.00134239	6.55317e-05	0.267942	FALSE
TP53 p.S227P // TP53 p.227	4	4377	0.780269	0.105233	0.675035	0.638586	0.735716	0.9176	1.05708	0.917522	0.0684447	0.670989	0.809911	0.340705	0.267942	FALSE
NFE2L2 p.E82D	8	6974	0.479896	0.0107031	0.469192	0.935922	0.745359	0.629303	0.501316	0.629485	0.0684741	0.480454	0.00690064	0.539791	0.267942	FALSE
PPARD interface NCOA1	4	7115	-0.594256	-0.00332431	-0.590932	0.56604	0.68935	-0.857289	1.04397	0.85723	0.0685448	-0.627591	0.0616857	2.89093e-05	0.267942	FALSE
TP63 p.139	4	6997	-0.606625	0.0104275	-0.617052	1.37691	0.678513	-0.908811	0.448143	0.909418	0.0686116	-0.618569	0.759283	0.14369	0.267942	FALSE
HNF4A p.400	3	7067	-0.474448	0.00625093	-0.480699	0.88964	0.452004	-1.06305	0.540329	1.06348	0.0687049	-0.475581	0.403117	0.669257	0.267942	FALSE
TP53 p.G244S	6	4377	-0.438502	0.105233	-0.543736	0.70012	0.735716	-0.739097	0.776632	0.739057	0.0692837	-0.546304	0.768889	0.325314	0.267942	FALSE
ETS1 missense	45	7111	0.22935	0.00243989	0.22691	0.697746	0.804197	0.282372	0.325204	0.282157	0.0692956	0.218361	0.601104	0.00418505	0.267942	FALSE
MYB truncating	9	7097	-0.46469	-0.00556071	-0.45913	0.739511	0.767233	-0.598447	0.620856	0.598423	0.0692963	-0.465098	0.25221	0.956166	0.267942	FALSE
TCF4 interface MSC // TCF4 interface TAL1 // TCF4 interface FERD3L	4	7063	-0.686693	0.0263794	-0.713072	0.688257	0.787235	-0.905839	1.03606	0.905793	0.069771	-0.713604	0.00100802	0.355168	0.268658	FALSE
SREBF1 interface SREBF1 // SREBF1 p.R388C // SREBF1 p.388	3	7093	-0.727013	0.010322	-0.737335	0.734682	0.702052	-1.05024	1.00361	1.05026	0.0703721	-0.733779	0.804927	0.230866	0.269853	FALSE
ATF1 missense	23	7133	0.296663	0.01827	0.278393	0.883953	0.763726	0.36433	0.314941	0.36452	0.0712669	0.287374	4.51962e-06	0.0024679	0.270852	FALSE
RELA p.H484fs // RELA p.H487fs	6	7103	-0.528401	0.00594616	-0.534347	0.41206	0.709003	-0.753835	1.29677	0.75366	0.071485	-0.521749	0.268225	0.00176433	0.270852	FALSE
RUNX1 p.171	5	7043	0.642266	-0.0106132	0.652879	0.261835	0.80282	0.813439	2.49348	0.813233	0.0715083	0.647292	0.200784	0.903742	0.270852	FALSE
TP53 p.L130fs // TP53 p.L37fs	3	4377	-0.653767	0.105233	-0.759001	1.13243	0.735716	-1.03133	0.670239	1.03165	0.072331	-0.764174	0.796216	0.344966	0.272855	FALSE
TP53 interface GTF2H1	4	4377	-0.554053	0.105233	-0.659287	0.595621	0.735716	-0.896222	1.10689	0.896116	0.0726933	-0.660682	0.773657	0.306818	0.273111	FALSE
TP53 p.D259Y	5	4377	-0.486837	0.105233	-0.59207	0.670456	0.735716	-0.804816	0.883086	0.804754	0.0737411	-0.588975	0.800762	0.334135	0.275641	FALSE
TBP interface GTF2A2	4	7113	0.734932	-0.000902505	0.735835	0.542072	0.818471	0.899142	1.35745	0.899035	0.0744775	0.730203	0.666269	0.145192	0.275641	FALSE
TP53 p.237	23	4377	-0.167195	0.105233	-0.272428	0.550444	0.735716	-0.370699	0.494925	0.37029	0.0745396	-0.274113	0.810226	0.382243	0.275641	FALSE
STAT6 p.Q171fs // STAT6 p.Q281fs	12	7073	-0.406717	0.00794111	-0.414658	0.635635	0.790623	-0.524614	0.652353	0.52447	0.0745548	-0.406632	0.037351	5.56016e-06	0.275641	FALSE
NFE2L2 p.E79K	6	6974	0.548738	0.0107031	0.538035	1.13071	0.745359	0.721511	0.475837	0.721847	0.075415	0.541379	0.0071499	0.489968	0.277715	FALSE
TP53 DNA interactionloss // TP53 interaction decreasing SAFB // TP53 interaction decreasing PIAS4 // TP53 interaction increasing B2R5M9 // TP53 interaction increasing B2R6D7 // TP53 interaction increasing B4DVN3 // TP53 interaction increasing NRDC // TP53 interaction increasing KDM1A // TP53 interaction increasing OBSL1 // TP53 interaction increasing MPDZ // TP53 interaction increasing HERC2 // T…	80	4377	-0.0438041	0.105233	-0.149038	0.648771	0.735716	-0.202976	0.229723	0.202575	0.0763677	-0.146925	0.690799	0.431583	0.280112	FALSE
TP53 p.V140fs	3	4377	0.851482	0.105233	0.746249	0.794854	0.735716	1.01428	0.938851	1.01432	0.0771942	0.751357	0.785023	0.341379	0.280815	FALSE
TP53 p.L265P	3	4377	-0.64685	0.105233	-0.752084	0.397848	0.735716	-1.02241	1.89038	1.02225	0.0775674	-0.750152	0.791306	0.327525	0.280815	FALSE
TP53 p.342	3	4377	0.851697	0.105233	0.746463	1.14703	0.735716	1.01428	0.65078	1.01461	0.07775	0.750016	0.767472	0.298752	0.280815	FALSE
RUNX1 p.D171G	3	7043	0.807084	-0.0106132	0.817697	0.149857	0.80282	1.01867	5.4565	1.01853	0.07777	0.81774	0.197653	0.90276	0.280815	FALSE
HNF1A p.G226fs	11	7095	-0.255689	-0.000901775	-0.254788	0.350621	0.506109	-0.503608	0.726674	0.503424	0.0781204	-0.269031	0.0143833	0.246684	0.280988	FALSE
STAT1 p.649	3	7068	0.831789	0.0134036	0.818386	0.513419	0.798822	1.02458	1.59399	1.02449	0.0796003	0.80806	0.847555	0.000238357	0.282733	FALSE
TP53 p.286	25	4377	-0.153292	0.105233	-0.258525	0.457553	0.735716	-0.351982	0.565017	0.351393	0.0798263	-0.258162	0.771855	0.33474	0.282733	FALSE
JUN missense	15	7136	-0.316581	0.0100923	-0.326673	0.647709	0.717228	-0.455549	0.504352	0.455467	0.080346	-0.324098	0.322939	0.016514	0.282733	FALSE
TP53 p.271	14	4377	-0.232984	0.105233	-0.338217	0.630838	0.735716	-0.459892	0.536139	0.459712	0.0805046	-0.344472	0.800801	0.294025	0.282733	FALSE
TP53 p.Y163C	20	4377	-0.181469	0.105233	-0.286703	0.702697	0.735716	-0.389766	0.408003	0.389692	0.0805057	-0.288248	0.882699	0.338963	0.282733	FALSE
CDC5L truncating	28	7067	-0.305952	0.0109805	-0.316932	0.938737	0.927196	-0.341802	0.337615	0.341818	0.0805419	-0.306376	1.17204e-05	0.00442814	0.282733	FALSE
TP53 CDK7 phosphorylation loss	8	4377	0.565743	0.105233	0.460509	0.411959	0.735716	0.626277	1.11785	0.625934	0.0807383	0.454721	0.769647	0.320965	0.282733	FALSE
ETS1 p.45	3	7111	0.822059	0.00243989	0.819619	0.20441	0.804197	1.01931	4.00968	1.01918	0.0823006	0.806639	0.674631	0.00435058	0.284308	FALSE
CTCF p.377	4	7006	0.675353	0.0102334	0.66512	0.801795	0.736315	0.903273	0.829539	0.903309	0.0823208	0.639748	0.625268	0.0014478	0.284308	FALSE
NFE2L2 p.D29Y	4	6974	0.649526	0.0107031	0.638823	0.415809	0.745359	0.857195	1.53634	0.857068	0.0823889	0.64733	0.00784073	0.55052	0.284308	FALSE
MYC inframe indel	4	7143	-0.632902	0.00807158	-0.640973	0.820582	0.734874	-0.872178	0.78112	0.872223	0.0824136	-0.638272	0.0555011	0.00388246	0.284308	FALSE
TP53 p.F270S	4	4377	-0.530425	0.105233	-0.635658	0.286175	0.735716	-0.864251	2.22122	0.864	0.0829092	-0.638327	0.772446	0.323628	0.284371	FALSE
E2F7 truncating	26	7053	0.218285	0.0124744	0.205811	0.528122	0.626168	0.32885	0.389703	0.328683	0.0834086	0.212861	0.0362385	0.00396825	0.284371	FALSE
TP53 p.163	30	4377	-0.126024	0.105233	-0.231258	0.736027	0.735716	-0.31433	0.314198	0.314331	0.0839948	-0.23302	0.888964	0.356151	0.284371	FALSE
NANOG missense	24	7131	-0.258418	-0.0140228	-0.244395	0.890387	0.680918	-0.35851	0.274482	0.358919	0.0841076	-0.240852	0.483367	0.165621	0.284371	FALSE
TBP p.52del // TBP p.72del	9	7113	-0.469783	-0.000902505	-0.468881	0.597252	0.818471	-0.573024	0.785064	0.572873	0.0842772	-0.471255	0.662748	0.134477	0.284371	FALSE
HNF1A p.131	4	7095	0.444734	-0.000901775	0.445636	0.226565	0.506109	0.880662	1.96693	0.880514	0.0845061	0.436602	0.0139806	0.252751	0.284371	FALSE
NFE2L2 p.R34Q	6	6974	0.522923	0.0107031	0.51222	1.00641	0.745359	0.68701	0.508955	0.687212	0.0845769	0.525226	0.00931162	0.572989	0.284371	FALSE
KLF5 p.E419Q	7	7097	-0.495823	0.0176616	-0.513485	0.425305	0.809207	-0.634747	1.20733	0.634553	0.0853894	-0.526181	0.0437036	0.0579432	0.285407	FALSE
RXRA interface NCOR2	4	7108	-0.565046	-0.00480923	-0.560237	0.366749	0.656272	-0.85379	1.52758	0.853666	0.0855004	-0.564582	0.535229	0.202598	0.285407	FALSE
TP53 p.N131fs	5	4377	-0.454907	0.105233	-0.560141	0.437096	0.735716	-0.76158	1.2815	0.761355	0.0859231	-0.565651	0.785549	0.315576	0.285791	FALSE
MYCN p.44	4	7102	-0.639271	0.0125213	-0.651792	1.59967	0.759301	-0.857787	0.407454	0.85841	0.0865833	-0.650838	0.0560845	0.00143858	0.286242	FALSE
MITF missense	60	7095	-0.119356	0.00920353	-0.128559	0.664099	0.611859	-0.209959	0.193585	0.210113	0.0866758	-0.135969	0.0288739	0.00276352	0.286242	FALSE
E2F7 p.160	3	7053	-0.59812	0.0124744	-0.610594	0.369703	0.626168	-0.975218	1.65158	0.975128	0.0914793	-0.609858	0.0305639	0.00317162	0.300049	FALSE
GABPA missense	43	7115	0.201106	0.000316052	0.20079	0.686234	0.784117	0.256248	0.292597	0.256072	0.0915032	0.202325	0.364525	0.0599633	0.300049	FALSE
CDX2 truncating	11	7128	-0.281618	0.0194351	-0.301053	0.609672	0.600063	-0.501691	0.493795	0.501702	0.0929306	-0.304057	0.247733	0.000836593	0.302614	FALSE
TP53 p.265	6	4377	-0.397842	0.105233	-0.503076	0.391024	0.735716	-0.684071	1.28656	0.683791	0.0929377	-0.505001	0.788541	0.326579	0.302614	FALSE
IRF2 truncating	14	7091	-0.385397	-0.00430746	-0.38109	0.838177	0.840498	-0.453412	0.454665	0.45341	0.0935915	-0.376992	0.0383241	0.237511	0.303677	FALSE
TP53 p.251	6	4377	-0.400612	0.105233	-0.505846	0.821465	0.735716	-0.687459	0.615785	0.687556	0.0946082	-0.502677	0.75378	0.343776	0.30451	FALSE
TP53 p.K132N	16	4377	-0.206094	0.105233	-0.311327	0.620772	0.735716	-0.423371	0.501516	0.423163	0.0948734	-0.307824	0.773633	0.29929	0.30451	FALSE
TP53 p.R280I	4	4377	-0.509294	0.105233	-0.614527	0.601258	0.735716	-0.835373	1.02207	0.835278	0.0950684	-0.614471	0.782789	0.319296	0.30451	FALSE
SMAD3 interface SKI // SMAD3 interface SKIL	7	7093	0.554625	0.0178004	0.536825	0.636238	0.833442	0.64422	0.843748	0.644106	0.0951607	0.525012	0.00010597	0.000135096	0.30451	FALSE
FOXA1 p.S250F // FOXA1 p.250	3	7067	-0.682763	0.0285778	-0.71134	0.685808	0.748536	-0.95033	1.03723	0.950309	0.0956177	-0.720232	0.00888609	0.20627	0.304921	FALSE
YY1 p.E228fs	4	7129	0.656273	0.00834251	0.647931	0.902751	0.796413	0.813512	0.717729	0.81356	0.0971614	0.660636	0.906818	0.00183802	0.308301	FALSE
TP53 p.K120E // TP53 p.120 // TP53 PTM KAT6A acetylation loss	4	4377	-0.506861	0.105233	-0.612094	0.370234	0.735716	-0.832184	1.65326	0.831971	0.0973419	-0.610549	0.77565	0.314127	0.308301	FALSE
TP53 p.M246V	4	4377	-0.491969	0.105233	-0.597203	0.500937	0.735716	-0.81188	1.19217	0.81173	0.100345	-0.605019	0.790843	0.331842	0.31594	FALSE
TP53 CDK2 phosphorylation loss	4	4377	0.715513	0.105233	0.610279	0.549375	0.735716	0.82963	1.11086	0.829504	0.100516	0.604622	0.763248	0.324104	0.31594	FALSE
TP53 p.R267P	5	4377	-0.42426	0.105233	-0.529493	0.619453	0.735716	-0.719794	0.854775	0.719698	0.101091	-0.540237	0.799248	0.32288	0.31594	FALSE
STAT1 missense	81	7068	0.15817	0.0134036	0.144766	0.844282	0.798822	0.181106	0.171466	0.181224	0.101365	0.146289	0.818145	0.000259667	0.31594	FALSE
TP53 p.C135F	5	4377	-0.435681	0.105233	-0.540915	0.797416	0.735716	-0.735164	0.678334	0.735223	0.101456	-0.539408	0.791116	0.293985	0.31594	FALSE
SMAD4 p.441	6	6912	0.481227	0.0115843	0.469643	1.23541	0.747385	0.627989	0.380153	0.628382	0.102419	0.498404	0.000100252	0.0511186	0.316436	FALSE
PLAG1 p.K102fs // PLAG1 p.K184fs	3	7089	-0.755528	0.0138648	-0.769393	0.243988	0.796174	-0.966486	3.15341	0.966362	0.102548	-0.750369	0.0108255	0.0656994	0.316436	FALSE
FLI1 p.303	3	7090	-0.738181	0.000189083	-0.73837	0.19049	0.764628	-0.965787	3.87616	0.965659	0.102638	-0.720694	0.110581	0.108394	0.316436	FALSE
TCF4 interface MYOD1 // TCF4 interface ID1 // TCF4 interface PTF1A	3	7063	-0.718502	0.0263794	-0.744882	0.612245	0.787235	-0.946252	1.21664	0.946199	0.104065	-0.738514	0.00106828	0.363678	0.318737	FALSE
TP53 p.L35fs	3	4377	-0.574203	0.105233	-0.679436	0.0851845	0.735716	-0.923712	7.97606	0.923504	0.104072	-0.690991	0.782574	0.322236	0.318737	FALSE
TP53 p.L194R	13	4377	-0.228356	0.105233	-0.333589	0.670633	0.735716	-0.453526	0.497424	0.453421	0.104756	-0.33156	0.822563	0.351611	0.319777	FALSE
GLI2 p.556	3	6958	-0.695874	0.00379928	-0.699673	0.19434	0.750861	-0.931953	3.60024	0.931828	0.106106	-0.70027	0.00125486	0.864538	0.32077	FALSE
NFE2L2 truncating	8	6974	0.447141	0.0107031	0.436438	0.35766	0.745359	0.585767	1.22026	0.585541	0.106431	0.425462	0.00777465	0.56261	0.32077	FALSE
TP53 hotspot T211	99	4377	-0.0159741	0.105233	-0.121207	0.705776	0.735716	-0.164892	0.171737	0.164748	0.106613	-0.120641	0.853557	0.313887	0.32077	FALSE
TP53 p.I195S	3	4377	-0.578409	0.105233	-0.683643	0.185029	0.735716	-0.92942	3.69478	0.929221	0.106621	-0.685835	0.784593	0.322945	0.32077	FALSE
PLAG1 missense	62	7089	-0.157943	0.0138648	-0.171808	0.760566	0.796174	-0.215872	0.225895	0.215792	0.106809	-0.163721	0.0132254	0.0684174	0.32077	FALSE
YBX1 p.222	4	7128	0.611878	0.0126825	0.599196	0.539145	0.757062	0.791557	1.11138	0.791475	0.110589	0.604197	0.772917	0.166413	0.329344	FALSE
TP53 p.R342fs	5	4377	-0.416989	0.105233	-0.522223	0.373283	0.735716	-0.710057	1.399	0.709816	0.110684	-0.525142	0.778068	0.338642	0.329344	FALSE
TP53 p.E339fs	4	4377	0.691097	0.105233	0.585864	0.584385	0.735716	0.796419	1.00253	0.796318	0.110916	0.586826	0.751821	0.30848	0.329344	FALSE
GATA6 missense	34	7116	-0.193098	0.0075947	-0.200693	0.816028	0.723583	-0.277186	0.245939	0.27736	0.111293	-0.198249	0.542141	0.0996262	0.329344	FALSE
MYCN interface MAX	4	7102	0.614349	0.0125213	0.601828	1.61862	0.759301	0.792015	0.371815	0.792607	0.111439	0.60452	0.055993	0.00116212	0.329344	FALSE
NR3C1 interface NR3C1	8	7087	0.460969	0.0148519	0.446117	0.595877	0.797802	0.559304	0.748672	0.559182	0.111949	0.448558	0.130866	0.55464	0.329801	FALSE
IRF1 truncating	4	7131	0.655848	0.0126859	0.643162	0.765677	0.839758	0.765916	0.839991	0.765889	0.11356	0.664661	0.424962	0.0102602	0.333487	FALSE
ELF1 p.K176fs	3	7086	0.677743	0.00249308	0.67525	0.134198	0.716392	0.942699	5.03174	0.942571	0.114885	0.652326	0.267207	0.0722863	0.336315	FALSE
TP53 p.152	11	4377	-0.241715	0.105233	-0.346949	0.670326	0.735716	-0.471671	0.517582	0.47158	0.115717	-0.34944	0.707878	0.317641	0.337685	FALSE
ZNF263 interface SCAND1 // ZNF263 interface ZSCAN1	3	7107	0.712164	0.005786	0.706378	0.483492	0.790342	0.893841	1.46099	0.893762	0.117088	0.715079	0.519185	0.0202826	0.340115	FALSE
TP53 hotspot T304	5	4377	-0.413456	0.105233	-0.518689	0.23258	0.735716	-0.705303	2.23016	0.705013	0.117283	-0.515655	0.782667	0.320197	0.340115	FALSE
RREB1 missense	138	7011	0.082924	-0.00625802	0.089182	0.811109	0.718286	0.123833	0.109951	0.124159	0.119341	0.0963755	3.63036e-05	0.636046	0.345005	FALSE
GATA3 p.P426fs	3	6972	-0.600182	0.0233682	-0.62355	1.07098	0.702129	-0.887916	0.582221	0.888085	0.119968	-0.630497	0.17434	0.0532049	0.345742	FALSE
TP53 p.M237I	14	4377	-0.197643	0.105233	-0.302877	0.610177	0.735716	-0.411867	0.496375	0.411676	0.120447	-0.305855	0.799451	0.378196	0.345927	FALSE
TEAD1 truncating	4	7157	0.529536	0.00372872	0.525807	0.96782	0.690675	0.761141	0.54329	0.761295	0.120778	0.535504	0.00044128	0.0166128	0.345927	FALSE
SREBF2 missense	69	7058	0.102343	-0.000480323	0.102823	0.54299	0.555699	0.185073	0.189364	0.185034	0.121287	0.104271	0.641384	0.973234	0.346317	FALSE
TP53 p.178	3	4377	-0.56099	0.105233	-0.666224	0.202441	0.735716	-0.905737	3.29095	0.905545	0.122829	-0.655902	0.785532	0.32235	0.349644	FALSE
TP53 p.R249G	6	4377	-0.35132	0.105233	-0.456554	0.450345	0.735716	-0.620779	1.01379	0.620557	0.125531	-0.460474	0.776289	0.312156	0.355955	FALSE
TP53 p.G154fs // TP53 p.G22fs // TP53 p.G61fs	5	4377	-0.398165	0.105233	-0.503398	1.06421	0.735716	-0.683888	0.473027	0.684229	0.125813	-0.504479	0.794622	0.334955	0.355955	FALSE
TCF4 interface ID2 // TCF4 interface ID3	4	7063	-0.57593	0.0263794	-0.602309	0.808907	0.787235	-0.765085	0.744597	0.765094	0.126925	-0.600805	0.00107738	0.362296	0.357109	FALSE
HNF4A p.58	3	7067	-0.393347	0.00625093	-0.399598	0.563235	0.452004	-0.883989	0.70947	0.884059	0.126991	-0.398447	0.327806	0.697475	0.357109	FALSE
TP53 p.P36fs	4	4377	-0.450312	0.105233	-0.555546	0.662889	0.735716	-0.755158	0.838068	0.755109	0.127498	-0.561104	0.763016	0.314008	0.357451	FALSE
TP53 p.216	18	4377	-0.163567	0.105233	-0.2688	0.857684	0.735716	-0.365105	0.313402	0.365359	0.128829	-0.264266	0.78516	0.343965	0.359694	FALSE
HIF1A interface ARNT	3	7094	0.625852	0.0122605	0.613591	0.997018	0.701366	0.874726	0.615426	0.874851	0.129109	0.614925	0.881436	0.684774	0.359694	FALSE
TP53 p.P126fs // TP53 p.P219fs // TP53 p.P87fs	3	4377	-0.529355	0.105233	-0.634588	0.539525	0.735716	-0.862636	1.1762	0.862545	0.12946	-0.644686	0.792868	0.322664	0.359694	FALSE
KLF5 p.301	4	7097	0.618088	0.0176616	0.600427	0.30828	0.809207	0.742128	1.94766	0.741994	0.130327	0.612032	0.0473342	0.0529489	0.361022	FALSE
FOXA1 missense	67	7067	-0.114693	0.0285778	-0.14327	0.843276	0.748536	-0.191163	0.169898	0.191401	0.130886	-0.139094	0.0116718	0.131649	0.361445	FALSE
TP53 p.G105C	3	4377	-0.53321	0.105233	-0.638443	0.146156	0.735716	-0.867975	4.36823	0.867785	0.131422	-0.641129	0.787522	0.324128	0.361445	FALSE
SMAD4 p.538	3	6912	-0.643451	0.0115843	-0.655035	0.245849	0.747385	-0.876549	2.66438	0.876436	0.131649	-0.649892	0.000110045	0.0528565	0.361445	FALSE
NFE2L2 p.R34P	6	6974	0.457278	0.0107031	0.446575	0.424028	0.745359	0.599286	1.05317	0.599141	0.132244	0.458124	0.00782926	0.522311	0.362009	FALSE
ESR2 p.S112L // ESR2 p.112	3	7099	0.759125	0.0103117	0.748813	0.362025	0.856089	0.874791	2.0684	0.87469	0.133081	0.742015	0.0148985	0.0043845	0.363229	FALSE
E2F7 p.N49fs	3	7053	0.53313	0.0124744	0.520655	0.495866	0.626168	0.831538	1.04999	0.831494	0.135015	0.54014	0.0301893	0.00280719	0.366561	FALSE
CEBPA interface CEBPB // CEBPA interface ATF4 // CEBPA interface ATF5	8	7121	0.368942	0.00504518	0.363896	0.585747	0.687317	0.529516	0.621252	0.529445	0.135356	0.363236	0.656196	0.369831	0.366561	FALSE
TP53 hotspot T55	3	4377	-0.530943	0.105233	-0.636176	0.727284	0.735716	-0.864708	0.874729	0.864704	0.135487	-0.634555	0.774832	0.305966	0.366561	FALSE
STAT1 interface STAT2	12	7068	0.342149	0.0134036	0.328745	0.661785	0.798822	0.411638	0.496755	0.411537	0.137601	0.342422	0.821895	0.000247994	0.371198	FALSE
HNF4A p.472	4	7067	-0.323173	0.00625093	-0.329424	0.307413	0.452004	-0.728891	1.0716	0.728808	0.138857	-0.334738	0.322173	0.673814	0.373501	FALSE
TBP missense	17	7113	0.289374	-0.000902505	0.290276	0.631034	0.818471	0.354818	0.460001	0.354657	0.141352	0.292309	0.667316	0.145717	0.377984	FALSE
BACH1 interface BACH1	3	7077	0.670085	0.0227975	0.647288	1.04989	0.755907	0.856194	0.61653	0.856306	0.141413	0.641998	0.0379006	0.896438	0.377984	FALSE
TP53 p.I195F	6	4377	-0.327625	0.105233	-0.432859	1.08427	0.735716	-0.587957	0.399218	0.58835	0.141766	-0.442265	0.762294	0.335239	0.377984	FALSE
TP53 p.232	8	4377	-0.277962	0.105233	-0.383195	0.578637	0.735716	-0.521006	0.662239	0.520847	0.142727	-0.381616	0.764132	0.315476	0.377984	FALSE
TP53 p.194	20	4377	-0.139648	0.105233	-0.244881	0.810154	0.735716	-0.332695	0.302265	0.332848	0.142862	-0.241849	0.8656	0.344974	0.377984	FALSE
TP53 p.E271K	11	4377	-0.216351	0.105233	-0.321584	0.683903	0.735716	-0.437172	0.470219	0.437104	0.142968	-0.325659	0.796623	0.29298	0.377984	FALSE
TP53 p.C141W	5	4377	-0.373557	0.105233	-0.47879	0.180429	0.735716	-0.651061	2.65363	0.650782	0.14409	-0.480853	0.786542	0.323013	0.379868	FALSE
STAT3 p.661	3	7070	0.604235	0.00858331	0.595652	0.433866	0.722323	0.824708	1.37289	0.824633	0.144592	0.608474	0.465333	0.0183849	0.380112	FALSE
YY1 hotspot T378 // YY1 hotspot Y383	4	7129	0.6049	0.00834251	0.596558	0.535756	0.796413	0.749142	1.11349	0.749055	0.145319	0.579876	0.898284	0.00196265	0.380944	FALSE
TP53 p.Y126D	3	4377	-0.509386	0.105233	-0.61462	1.06418	0.735716	-0.835195	0.57755	0.835404	0.146073	-0.618009	0.789691	0.33789	0.381841	FALSE
TBP interface BRF2	3	7113	0.698823	-0.000902505	0.699726	0.657982	0.818471	0.85496	1.06344	0.854917	0.146782	0.68596	0.665055	0.144262	0.382618	FALSE
ARNTL p.84	3	7117	-0.655114	-0.00770235	-0.647412	1.36668	0.770354	-0.840155	0.473711	0.840408	0.147719	-0.644438	0.266206	0.806357	0.383171	FALSE
FOXO3 hotspot S294 // FOXO3 hotspot S299	3	7129	0.722886	0.0116803	0.711206	0.932067	0.855333	0.831474	0.763042	0.831496	0.147927	0.715019	0.994821	0.718258	0.383171	FALSE
TP53 p.132	30	4377	-0.0937246	0.105233	-0.198958	0.723318	0.735716	-0.270458	0.275063	0.270428	0.148233	-0.19498	0.726896	0.296418	0.383171	FALSE
ESR1 interface NCOA2	5	7072	-0.45615	0.0227464	-0.478897	0.972292	0.745607	-0.642164	0.492544	0.642291	0.149841	-0.480696	0.434089	0.0595953	0.386251	FALSE
ARNTL interface HIF1A	12	7117	-0.327324	-0.00770235	-0.319622	0.907781	0.770354	-0.414778	0.352092	0.414903	0.15078	-0.31997	0.256385	0.756298	0.387539	FALSE
TP53 p.278	32	4377	-0.081365	0.105233	-0.186598	0.630042	0.735716	-0.253867	0.296168	0.253628	0.151652	-0.18704	0.766655	0.332582	0.387539	FALSE
MEF2A inframe indel // MEF2A p.419del	15	7111	0.323806	-0.00635796	0.330164	1.03247	0.835806	0.394821	0.319782	0.395025	0.152307	0.309259	0.784317	0.000113582	0.387539	FALSE
TFAP2C truncating	7	7105	-0.40428	0.0184915	-0.422771	0.997334	0.79474	-0.531833	0.423902	0.531962	0.152575	-0.429922	0.149919	0.0230522	0.387539	FALSE
TP53 p.P278R	4	4377	-0.426268	0.105233	-0.531501	0.778306	0.735716	-0.722398	0.682895	0.722427	0.152662	-0.526566	0.801712	0.314529	0.387539	FALSE
MYC truncating	3	7143	0.579314	0.00807158	0.571243	0.0731446	0.734874	0.777442	7.80977	0.777335	0.153497	0.605456	0.0584331	0.00431304	0.387539	FALSE
TP53 p.G105R	3	4377	-0.511993	0.105233	-0.617226	0.607316	0.735716	-0.839008	1.01632	0.838947	0.153749	-0.60642	0.783469	0.32234	0.387539	FALSE
GABPA truncating	5	7115	0.50638	0.000316052	0.506064	0.325364	0.784117	0.645544	1.55538	0.645394	0.154035	0.500103	0.399475	0.051869	0.387539	FALSE
TP53 p.63del	3	4377	-0.51134	0.105233	-0.616573	0.89789	0.735716	-0.837965	0.686691	0.838059	0.154099	-0.606013	0.807299	0.323285	0.387539	FALSE
TP53 p.R267L	3	4377	-0.491263	0.105233	-0.596496	0.281174	0.735716	-0.810928	2.12145	0.81077	0.155026	-0.604749	0.802909	0.32525	0.387989	FALSE
POU3F2 interface POU3F2	7	7121	-0.428327	0.0103698	-0.438697	0.850069	0.779478	-0.562764	0.516073	0.562809	0.15538	-0.418669	0.000629128	0.975006	0.387989	FALSE
ARNTL interface NPAS2	16	7117	-0.281875	-0.00770235	-0.274173	0.796546	0.770354	-0.355879	0.344203	0.355905	0.155532	-0.273949	0.259598	0.765183	0.387989	FALSE
TP53 p.G266V	14	4377	-0.174597	0.105233	-0.27983	0.754827	0.735716	-0.380321	0.370721	0.380351	0.156111	-0.279485	0.819794	0.316032	0.388319	FALSE
PPARD p.113	4	7115	-0.461761	-0.00332431	-0.458437	0.526331	0.68935	-0.665087	0.871005	0.665028	0.156748	-0.487756	0.0617412	3.06458e-05	0.388319	FALSE
E2F4 inframe indel	7	7129	0.349597	0.0135014	0.336096	0.668077	0.690162	0.486994	0.50308	0.486981	0.157106	0.368828	0.00135831	9.57681e-05	0.388319	FALSE
STAT6 p.C772Y // STAT6 p.772	3	7073	-0.688168	0.00794111	-0.696109	0.885616	0.790623	-0.880425	0.786017	0.880456	0.157338	-0.644782	0.034936	5.60638e-06	0.388319	FALSE
ZNF423 p.229	3	6936	-0.530949	-0.00236767	-0.528582	0.888473	0.653417	-0.808851	0.594933	0.80895	0.15964	-0.530664	0.0630546	0.296561	0.392955	FALSE
CDX2 p.V306fs	8	7128	-0.270281	0.0194351	-0.289716	0.718144	0.600063	-0.482707	0.403423	0.482809	0.160871	-0.29755	0.246168	0.00086972	0.394937	FALSE
HNF4A interface NR2C2	4	7067	0.322085	0.00625093	0.315835	0.45248	0.452004	0.698742	0.698007	0.698743	0.163059	0.315413	0.352391	0.64997	0.397888	FALSE
E2F4 truncating	4	7129	-0.506762	0.0135014	-0.520264	0.700758	0.690162	-0.753823	0.74243	0.753828	0.163565	-0.480357	0.00171039	8.10553e-05	0.397888	FALSE
TP53 p.C242S	3	4377	-0.485059	0.105233	-0.590292	0.934033	0.735716	-0.802226	0.631982	0.802338	0.163947	-0.591851	0.773539	0.339453	0.397888	FALSE
E2F7 p.C151R // E2F7 p.151	4	7053	0.445353	0.0124744	0.432878	0.87899	0.626168	0.69117	0.492473	0.691313	0.16456	0.435199	0.0271512	0.0034517	0.397888	FALSE
TP53 p.P250L // TP53 p.250	9	4377	-0.231226	0.105233	-0.336459	0.598438	0.735716	-0.457464	0.562229	0.457322	0.164562	-0.341288	0.800634	0.356374	0.397888	FALSE
E2F4 p.307del	3	7129	0.527289	0.0135014	0.513788	0.678078	0.690162	0.744449	0.757712	0.744445	0.16502	0.552641	0.00146408	8.65493e-05	0.397888	FALSE
TCF4 p.P491fs // TCF4 p.P517fs // TCF4 p.P576fs // TCF4 p.P580fs // TCF4 p.P587fs // TCF4 p.P591fs // TCF4 p.P605fs // TCF4 p.P622fs // TCF4 p.P623fs // TCF4 p.P627fs // TCF4 p.P644fs // TCF4 p.P647fs // TCF4 p.P651fs // TCF4 p.P657fs // TCF4 p.P753fs	3	7063	-0.618939	0.0263794	-0.645318	1.03841	0.787235	-0.819641	0.621447	0.819727	0.165104	-0.63094	0.00103972	0.362554	0.397888	FALSE
PPARG interface PPARG	10	7105	-0.315749	0.0141343	-0.329883	0.685395	0.750058	-0.439856	0.481304	0.439811	0.165919	-0.328839	0.400547	0.215669	0.397888	FALSE
TP53 p.G108fs	6	4377	-0.316966	0.105233	-0.422199	0.46314	0.735716	-0.57406	0.911602	0.573862	0.165932	-0.416493	0.756322	0.321089	0.397888	FALSE
ATF4 p.Q133fs	10	7102	0.350962	-0.0191349	0.370097	1.11608	0.82778	0.446864	0.331603	0.447096	0.166454	0.362459	0.0450055	0.00838191	0.398112	FALSE
PRDM14 p.328	4	7061	0.542687	0.0102834	0.532404	0.758109	0.763806	0.697042	0.702279	0.69704	0.167185	0.527643	0.125416	0.101243	0.398833	FALSE
RXRA p.P109fs	4	7108	-0.448658	-0.00480923	-0.443849	0.474207	0.656272	-0.676387	0.935981	0.676319	0.168365	-0.45224	0.53755	0.200928	0.398905	FALSE
NHLH1 missense	14	7146	0.263883	0.00288758	0.260995	0.765367	0.698264	0.373709	0.341007	0.373777	0.168579	0.257251	0.336024	0.0854584	0.398905	FALSE
SMAD3 hotspot S425	6	7093	0.474986	0.0178004	0.457186	1.00443	0.833442	0.548464	0.455168	0.548552	0.16877	0.467636	0.000122601	0.000142148	0.398905	FALSE
MEF2A p.P196S // MEF2A p.196	3	7111	0.619212	-0.00635796	0.62557	0.584549	0.835806	0.748517	1.07017	0.748463	0.169345	0.662954	0.733616	0.000108267	0.398905	FALSE
MEF2A missense	31	7111	0.19314	-0.00635796	0.199498	0.801012	0.835806	0.23873	0.249057	0.238689	0.170129	0.206229	0.743038	0.000101035	0.398905	FALSE
TP53 p.P130fs // TP53 p.P223fs // TP53 p.P91fs	3	4377	-0.473883	0.105233	-0.579116	0.606431	0.735716	-0.787204	0.954959	0.787147	0.170509	-0.582536	0.793851	0.321126	0.398905	FALSE
NR3C1 interface NR3C2	3	7087	0.632004	0.0148519	0.617152	0.559944	0.797802	0.773621	1.10217	0.773565	0.170524	0.63151	0.128573	0.555425	0.398905	FALSE
HLF p.196	3	7120	-0.605571	0.0168518	-0.622423	0.54992	0.79083	-0.787107	1.13184	0.78705	0.170654	-0.625669	0.0211616	0.443476	0.398905	FALSE
GATA3 p.S407fs // GATA3 p.S408fs	13	6972	0.307985	0.0233682	0.284617	0.545627	0.702129	0.405501	0.521633	0.405363	0.171422	0.26668	0.175709	0.0506068	0.399692	FALSE
TP53 p.H193N	3	4377	-0.471575	0.105233	-0.576808	0.253202	0.735716	-0.784168	2.27806	0.78401	0.172174	-0.580198	0.782155	0.326352	0.400439	FALSE
TP53 p.290	3	4377	0.689429	0.105233	0.584195	1.20228	0.735716	0.793748	0.485907	0.794051	0.173029	0.579387	0.774497	0.350768	0.401421	FALSE
RUNX1 p.157	3	7043	0.610248	-0.0106132	0.620861	1.14285	0.80282	0.773238	0.543256	0.77335	0.17373	0.630928	0.203673	0.875406	0.402043	FALSE
TP63 p.R643Q	3	6997	0.54553	0.0104275	0.535102	0.52141	0.678513	0.788685	1.02626	0.788639	0.174918	0.53157	0.785664	0.160858	0.402798	FALSE
TP53 p.Q331H // TP53 p.331	6	4377	-0.292223	0.105233	-0.397457	0.384385	0.735716	-0.540455	1.03401	0.540231	0.174924	-0.408006	0.782657	0.322148	0.402798	FALSE
TP53 p.V216L	3	4377	-0.468638	0.105233	-0.573871	0.379061	0.735716	-0.780149	1.51393	0.780018	0.175371	-0.576005	0.792832	0.331699	0.402827	FALSE
ARNT truncating	16	7096	-0.251547	0.0112526	-0.2628	0.869775	0.753662	-0.348575	0.302147	0.348697	0.176472	-0.2549	0.00247897	0.0547944	0.403695	FALSE
GLI2 p.D1059N // GLI2 p.1059	3	6958	0.625099	0.00379928	0.621299	0.648927	0.750861	0.82748	0.957426	0.827449	0.177203	0.585037	0.00149313	0.884369	0.403695	FALSE
YY1 inframe indel // YY1 p.70del	5	7129	0.483751	0.00834251	0.475409	0.631486	0.796413	0.596999	0.752841	0.596937	0.177611	0.480085	0.885923	0.00221056	0.403695	FALSE
STAT1 interface STAT1	20	7068	0.248121	0.0134036	0.234717	0.669358	0.798822	0.293947	0.35066	0.293829	0.178491	0.240435	0.804807	0.000234229	0.403695	FALSE
EZH2 p.708	3	7038	0.6181	-0.000757567	0.618857	0.175982	0.81527	0.759186	3.51659	0.759083	0.178505	0.633608	0.149286	0.809953	0.403695	FALSE
TBP interface GTF2A1	4	7113	0.562709	-0.000902505	0.563611	0.602275	0.818471	0.688681	0.935804	0.688614	0.178721	0.55059	0.662033	0.144288	0.403695	FALSE
GATA3 p.L343P // GATA3 p.343	3	6972	0.571566	0.0233682	0.548198	0.192597	0.702129	0.780869	2.84634	0.780765	0.178794	0.545055	0.169848	0.0511774	0.403695	FALSE
TP63 p.R266Q // TP63 p.266	3	6997	-0.517717	0.0104275	-0.528144	0.797622	0.678513	-0.778342	0.662148	0.778385	0.179546	-0.526106	0.801542	0.176163	0.403952	FALSE
TP53 p.182del // TP53 p.50del // TP53 p.89del	4	4377	-0.376879	0.105233	-0.482112	0.701734	0.735716	-0.655317	0.68703	0.655297	0.179779	-0.494056	0.740941	0.320825	0.403952	FALSE
TP53 p.110	11	4377	-0.189479	0.105233	-0.294713	0.734493	0.735716	-0.400581	0.401246	0.400579	0.182018	-0.296504	0.801552	0.324821	0.407977	FALSE
TP53 p.280	31	4377	-0.0693879	0.105233	-0.174621	0.861357	0.735716	-0.23705	0.202728	0.237349	0.182456	-0.177178	0.764601	0.375862	0.407977	FALSE
TCF3 interface MYOG // TCF3 interface MYF6 // TCF3 interface ID2 // TCF3 interface ID3	3	7120	-0.652447	0.0163394	-0.668787	0.547113	0.846207	-0.7904	1.22239	0.790335	0.182889	-0.650624	0.00944794	0.230144	0.407977	FALSE
CEBPB missense	4	7154	-0.502223	0.00263528	-0.504858	1.13245	0.782101	-0.645367	0.445809	0.645515	0.183537	-0.520208	0.000438893	0.793689	0.408442	FALSE
FOXO3 missense	28	7129	0.226774	0.0116803	0.215094	0.876361	0.855333	0.25145	0.24544	0.251474	0.184011	0.215432	0.984357	0.800222	0.408516	FALSE
USF1 p.R52Q // USF1 p.52	3	7124	0.517856	0.00332454	0.514532	0.443601	0.716511	0.71817	1.1599	0.718108	0.187784	0.544354	5.40454e-06	0.26022	0.415076	FALSE
TP53 CDK9 phosphorylation loss	3	4377	0.676264	0.105233	0.571031	0.665941	0.735716	0.776189	0.85748	0.776157	0.18786	0.559923	0.76332	0.321632	0.415076	FALSE
CTCF p.291	3	7006	-0.559296	0.0102334	-0.569529	1.20353	0.736315	-0.773301	0.473217	0.773486	0.188574	-0.558939	0.655729	0.00168862	0.415123	FALSE
TP53 p.F113C	3	4377	-0.457688	0.105233	-0.562921	0.657703	0.735716	-0.765169	0.85589	0.765134	0.188776	-0.558604	0.784467	0.336472	0.415123	FALSE
RELA interface NFKB1 // RELA interface RELB // RELA interface RELA // RELA interface REL	3	7103	-0.512329	0.00594616	-0.518275	0.944507	0.709003	-0.730912	0.548726	0.730991	0.190654	-0.535724	0.284087	0.001725	0.417352	FALSE
NR3C1 interface NR2F2 // NR3C1 interface NR2E3	4	7087	0.529289	0.0148519	0.514437	1.31011	0.797802	0.644587	0.392666	0.644818	0.190689	0.522383	0.117816	0.509856	0.417352	FALSE
TP53 p.244	21	4377	-0.103232	0.105233	-0.208465	0.712356	0.735716	-0.283391	0.292642	0.28335	0.19199	-0.210031	0.788343	0.338308	0.418804	FALSE
ESR1 missense	72	7072	-0.0957008	0.0227464	-0.118447	0.794391	0.745607	-0.158753	0.149104	0.15886	0.192255	-0.115249	0.356376	0.0487592	0.418804	FALSE
ESR2 p.326	3	7099	-0.641527	0.0103117	-0.651838	0.532037	0.856089	-0.76148	1.22518	0.761414	0.194947	-0.640275	0.0151882	0.00407108	0.422885	FALSE
PPARD interface NCOR1	9	7115	-0.283211	-0.00332431	-0.279886	0.700175	0.68935	-0.406008	0.399738	0.406015	0.19504	-0.297804	0.067315	3.19988e-05	0.422885	FALSE
TP53 p.245	77	4377	-0.00304066	0.105233	-0.108274	0.821651	0.735716	-0.146859	0.131776	0.147168	0.195516	-0.109856	0.74287	0.50546	0.42293	FALSE
ERG missense	59	7087	-0.139244	0.00340932	-0.142653	1.03317	0.83359	-0.17076	0.138073	0.171131	0.196428	-0.141167	0.730941	0.296345	0.423819	FALSE
POU2F1 hotspot S385	7	7096	0.324883	-0.0020886	0.326972	0.511323	0.668325	0.489326	0.639463	0.489241	0.196841	0.326035	0.00894711	0.547915	0.423819	FALSE
PPARA interface RXRG	8	7112	-0.380461	-0.00817094	-0.37229	1.2386	0.79129	-0.47015	0.300572	0.470485	0.198349	-0.360403	0.0648354	0.279914	0.426077	FALSE
NRF1 missense	43	7114	0.149576	-0.00816403	0.15774	0.94052	0.786093	0.20041	0.167716	0.200663	0.200431	0.153832	0.00679911	2.72255e-07	0.429556	FALSE
ESR1 LCK phosphorylation loss // ESR1 SRC phosphorylation loss // ESR1 CDK7 phosphorylation loss // ESR1 p.537	4	7072	0.510696	0.0227464	0.487949	0.33178	0.745607	0.654544	1.4707	0.654432	0.204277	0.473415	0.441782	0.0645337	0.434702	FALSE
USF1 truncating	5	7124	0.404826	0.00332454	0.401501	0.42077	0.716511	0.560459	0.954206	0.560356	0.204361	0.406269	5.34709e-06	0.261241	0.434702	FALSE
LEF1 p.276	3	7102	-0.551562	0.0152461	-0.566808	0.336144	0.786613	-0.720651	1.68621	0.720568	0.204671	-0.575881	0.435422	0.00522924	0.434702	FALSE
TP53 p.P278T	5	4377	-0.314575	0.105233	-0.419808	0.499365	0.735716	-0.570752	0.840683	0.570612	0.20481	-0.417451	0.752021	0.328903	0.434702	FALSE
SMAD4 interface SMAD9 // SMAD4 interface SMAD3 // SMAD4 interface SMAD5	93	6912	-0.101427	0.0115843	-0.113012	0.864816	0.747385	-0.150874	0.130677	0.151209	0.205797	-0.0989181	0.000142027	0.0352272	0.434702	FALSE
TFAP2A p.242	3	7104	0.595974	-0.0147411	0.610715	1.24269	0.851241	0.717327	0.491447	0.717441	0.205828	0.621954	0.172774	0.0676665	0.434702	FALSE
STAT2 p.P485fs // STAT2 p.P489fs	5	7080	0.476834	0.00670675	0.470128	1.52617	0.830492	0.565704	0.308045	0.566083	0.206112	0.469891	0.101439	0.00734394	0.434702	FALSE
ZNF423 p.907	3	6936	-0.465166	-0.00236767	-0.462798	0.527106	0.653417	-0.70831	0.877999	0.708274	0.20713	-0.475987	0.0618047	0.272297	0.43586	FALSE
POU2F1 interface POU2F1	4	7096	0.416053	-0.0020886	0.418141	0.498913	0.668325	0.625714	0.838104	0.625656	0.208353	0.4205	0.00910391	0.552059	0.437442	FALSE
RXRA interface NR1H3	16	7108	-0.207412	-0.00480923	-0.202603	0.541356	0.656272	-0.308822	0.374251	0.308718	0.208852	-0.20654	0.516422	0.183434	0.4375	FALSE
RARA truncating	3	7116	0.557155	-0.00846123	0.565617	0.525907	0.781459	0.723852	1.07551	0.723796	0.209674	0.566163	0.418592	0.411221	0.438232	FALSE
TCF3 interface ID1	4	7120	-0.527507	0.0163394	-0.543847	0.511855	0.846207	-0.642774	1.0625	0.642688	0.210352	-0.529903	0.00944746	0.227458	0.438661	FALSE
CTCF missense	93	7006	0.112968	0.0102334	0.102735	0.824802	0.736315	0.139296	0.124557	0.139526	0.211193	0.0962431	0.83062	0.00175363	0.438677	FALSE
EGR1 p.T331fs	12	7089	-0.297449	0.0232116	-0.320661	1.03052	0.843798	-0.379876	0.311164	0.380021	0.211732	-0.304509	0.00661671	0.148831	0.438677	FALSE
HNF4A interface NCOA2	4	7067	0.288499	0.00625093	0.282248	0.510506	0.452004	0.6244	0.552879	0.624437	0.211778	0.282458	0.341904	0.672628	0.438677	FALSE
FLI1 truncating	6	7090	-0.389503	0.000189083	-0.389693	0.828914	0.764628	-0.509618	0.470124	0.50965	0.213356	-0.388576	0.117009	0.0966082	0.440962	FALSE
STAT3 interface PIK3R2 // STAT3 interface PIK3R1	6	7070	0.371407	0.00858331	0.362824	0.906311	0.722323	0.5022	0.40033	0.502302	0.214314	0.366377	0.502264	0.0180744	0.441838	FALSE
TP53 p.107	4	4377	-0.350194	0.105233	-0.455428	0.527503	0.735716	-0.61913	0.863366	0.619027	0.215158	-0.456216	0.802911	0.333449	0.441838	FALSE
TP53 p.154	6	4377	-0.272005	0.105233	-0.377238	0.729715	0.735716	-0.512755	0.516966	0.51275	0.215208	-0.372669	0.789905	0.296813	0.441838	FALSE
TP53 p.G105V	4	4377	-0.340158	0.105233	-0.445392	0.703919	0.735716	-0.605403	0.632731	0.605386	0.216415	-0.455315	0.787186	0.322496	0.442836	FALSE
TP53 p.P89fs	4	4377	-0.337861	0.105233	-0.443094	0.662309	0.735716	-0.602302	0.669014	0.602263	0.216649	-0.455015	0.782182	0.322299	0.442836	FALSE
REL p.38	3	7107	0.597482	-0.00303758	0.60052	0.36984	0.817736	0.734451	1.62373	0.734368	0.219439	0.579734	0.165895	0.00838133	0.446628	FALSE
TP53 p.G105S	3	4377	-0.415063	0.105233	-0.520296	0.282121	0.735716	-0.707335	1.84423	0.707197	0.219467	-0.521951	0.782382	0.326256	0.446628	FALSE
FOXA1 p.176	6	7067	0.408443	0.0285778	0.379866	0.953085	0.748536	0.507367	0.398564	0.507478	0.220107	0.374981	0.008497	0.206616	0.446934	FALSE
FOSL2 interface JUNB	8	7106	0.292332	-0.00251162	0.294843	0.358246	0.685512	0.430261	0.82302	0.430107	0.22111	0.29655	0.0326268	0.195121	0.446934	FALSE
TP53 p.P169fs // TP53 p.P301fs	5	4377	-0.305695	0.105233	-0.410929	0.861427	0.735716	-0.558448	0.477033	0.558543	0.221562	-0.402825	0.806081	0.331822	0.446934	FALSE
E2F6 p.247	4	7147	-0.495522	0.0112273	-0.506749	1.22201	0.80813	-0.626895	0.414684	0.627064	0.221941	-0.493946	0.512662	0.151146	0.446934	FALSE
CEBPA p.311	3	7121	0.490828	0.00504518	0.485783	0.464875	0.687317	0.706836	1.04497	0.706782	0.222025	0.484853	0.673834	0.379847	0.446934	FALSE
E2F4 interface TFDP1	5	7129	0.387487	0.0135014	0.373985	0.821846	0.690162	0.541817	0.455055	0.54188	0.222531	0.376133	0.00160656	6.90572e-05	0.446984	FALSE
SOX2 truncating	5	7132	-0.416941	-0.00521242	-0.411728	0.338694	0.735081	-0.560237	1.21563	0.560113	0.225008	-0.398874	0.215124	0.0233678	0.450982	FALSE
TP53 p.F119fs // TP53 p.F212fs // TP53 p.F80fs	5	4377	-0.290116	0.105233	-0.39535	0.738487	0.735716	-0.537366	0.535351	0.537367	0.225842	-0.398849	0.81122	0.314799	0.451679	FALSE
TP53 p.P34fs	4	4377	0.548564	0.105233	0.443331	1.2965	0.735716	0.60215	0.341943	0.602584	0.226911	0.445291	0.789235	0.323464	0.45284	FALSE
IRF2 p.V334I // IRF2 p.334	3	7091	0.5938	-0.00430746	0.598108	0.4899	0.840498	0.711677	1.22088	0.711611	0.228671	0.584177	0.0410369	0.233603	0.453794	FALSE
POU5F1 missense	20	7136	-0.171949	0.00059981	-0.172549	0.82324	0.647688	-0.26619	0.209597	0.266407	0.229891	-0.174281	0.21202	0.147056	0.453794	FALSE
TP53 p.234	20	4377	-0.0929707	0.105233	-0.198204	0.910936	0.735716	-0.269093	0.217583	0.269403	0.229956	-0.198227	0.722139	0.273219	0.453794	FALSE
TP53 p.197	3	4377	-0.399583	0.105233	-0.504816	0.631047	0.735716	-0.686198	0.799966	0.686156	0.230342	-0.509801	0.785208	0.310559	0.453794	FALSE
TP53 p.224	4	4377	-0.337028	0.105233	-0.442262	0.823753	0.735716	-0.601079	0.536886	0.601131	0.231365	-0.440705	0.765531	0.305355	0.453794	FALSE
TP53 p.E224D	4	4377	-0.337028	0.105233	-0.442262	0.823753	0.735716	-0.601079	0.536886	0.601131	0.231365	-0.440705	0.765531	0.305355	0.453794	FALSE
ESR2 interface ESR2	10	7099	0.327162	0.0103117	0.31685	0.498367	0.856089	0.370268	0.635776	0.370113	0.231551	0.323767	0.0152414	0.0039743	0.453794	FALSE
MEF2A p.343del // MEF2A p.351del // MEF2A p.411del // MEF2A p.413del // MEF2A p.420del	9	7111	0.346143	-0.00635796	0.352501	1.16351	0.835806	0.421527	0.302963	0.421749	0.231556	0.333488	0.756477	0.000127971	0.453794	FALSE
MYB missense	54	7097	-0.129103	-0.00556071	-0.123542	0.851032	0.767233	-0.160886	0.145167	0.161023	0.231834	-0.12545	0.247806	0.972819	0.453794	FALSE
SMAD4 3D hotspot 314-546-1u7f // SMAD4 3D hotspot 314-549-1u7v	95	6912	-0.0940802	0.0115843	-0.105664	0.857282	0.747385	-0.14108	0.123255	0.141379	0.232043	-0.0924412	0.000137802	0.0357496	0.453794	FALSE
CTCF p.378	3	7006	-0.4712	0.0102334	-0.481434	0.173153	0.736315	-0.65393	2.78039	0.653842	0.232279	-0.507684	0.632563	0.00144295	0.453794	FALSE
ATF4 p.P134fs	4	7102	0.458917	-0.0191349	0.478052	1.38512	0.82778	0.577292	0.345134	0.577511	0.23288	0.493914	0.0453355	0.00957803	0.454012	FALSE
TP53 p.K132E	5	4377	0.48544	0.105233	0.380207	1.0226	0.735716	0.516565	0.371803	0.516785	0.235858	0.39071	0.770062	0.322094	0.457171	FALSE
GATA4 truncating	3	7126	-0.575511	0.0357741	-0.611285	0.40983	0.876926	-0.697153	1.49156	0.697077	0.235956	-0.599984	0.0101882	0.70746	0.457171	FALSE
RXRA interface RXRA	23	7108	-0.166499	-0.00480923	-0.16169	0.711094	0.656272	-0.246311	0.227382	0.246377	0.235978	-0.162756	0.522657	0.16342	0.457171	FALSE
TP53 p.P152L	7	4377	-0.218765	0.105233	-0.323998	0.529895	0.735716	-0.44053	0.611439	0.440385	0.239489	-0.327363	0.764618	0.309144	0.463005	FALSE
RXRA 3D hotspot 127-458-4nqa	13	7108	-0.214394	-0.00480923	-0.209585	0.589712	0.656272	-0.319408	0.355401	0.319356	0.24235	-0.21316	0.523293	0.184409	0.467563	FALSE
TP53 p.I232S	3	4377	-0.392168	0.105233	-0.497402	0.381993	0.735716	-0.676192	1.30212	0.676079	0.242861	-0.496359	0.78142	0.327289	0.467577	FALSE
LEF1 missense	51	7102	0.141313	0.0152461	0.126067	0.796898	0.786613	0.160251	0.158197	0.160266	0.243885	0.128817	0.40239	0.00477798	0.468577	FALSE
POU2F1 p.378	3	7096	0.454937	-0.0020886	0.457026	0.531029	0.668325	0.683873	0.860642	0.683838	0.244678	0.44898	0.00897166	0.551942	0.468715	FALSE
RREB1 p.275	4	7011	0.383097	-0.00625802	0.389355	0.908127	0.718286	0.541992	0.428745	0.542061	0.244967	0.417458	2.11301e-05	0.664177	0.468715	FALSE
MITF p.R370L // MITF p.R377L // MITF p.377	3	7095	-0.405977	0.00920353	-0.415181	0.235568	0.611859	-0.678638	1.76247	0.678557	0.245563	-0.409969	0.0277286	0.00333795	0.468887	FALSE
GATA2 truncating	7	7109	-0.333734	0.0131172	-0.346851	0.405654	0.779668	-0.445007	0.855041	0.44487	0.247593	-0.340919	0.439143	0.0112474	0.471632	FALSE
NFE2L2 p.G31A	6	6974	0.339031	0.0107031	0.328328	0.811821	0.745359	0.440467	0.404434	0.440497	0.248017	0.351756	0.00887759	0.539505	0.471632	FALSE
TP53 p.126	10	4377	-0.16044	0.105233	-0.265674	0.751692	0.735716	-0.361093	0.353434	0.361109	0.250232	-0.267914	0.801654	0.351427	0.474141	FALSE
GATA3 p.I350fs // GATA3 p.I351fs	3	6972	0.505833	0.0233682	0.482465	0.613226	0.702129	0.687169	0.786765	0.687146	0.250358	0.466056	0.16623	0.050813	0.474141	FALSE
RUNX2 hotspot S451	4	7074	0.400296	0.00588739	0.394408	0.772039	0.71648	0.550462	0.510866	0.550481	0.253807	0.408601	0.000231497	0.120811	0.479694	FALSE
TP53 p.G334V	3	4377	0.590522	0.105233	0.485288	0.317906	0.735716	0.659737	1.52652	0.659614	0.2559	0.482869	0.786923	0.322984	0.482667	FALSE
GATA6 truncating	7	7116	-0.306098	0.0075947	-0.313693	0.453467	0.723583	-0.433637	0.691765	0.433527	0.256997	-0.310143	0.618004	0.153721	0.483753	FALSE
HIF1A interface ARNT2	7	7094	0.310494	0.0122605	0.298233	0.713203	0.701366	0.425212	0.41816	0.425218	0.25882	0.299593	0.880543	0.671438	0.486198	FALSE
E2F6 p.R247G	3	7147	-0.523923	0.0112273	-0.53515	1.49504	0.80813	-0.661984	0.357951	0.662208	0.260872	-0.525023	0.51126	0.151146	0.48849	FALSE
SMAD4 p.331	3	6912	0.45834	0.0115843	0.446756	1.02762	0.747385	0.597682	0.434749	0.597759	0.261785	0.483923	0.000105193	0.0588777	0.48849	FALSE
EBF1 missense	87	7063	0.0859181	-0.00307619	0.0889943	0.769717	0.709891	0.125231	0.11562	0.125363	0.262069	0.085977	0.0220124	0.0304048	0.48849	FALSE
ZNF423 p.740	3	6936	0.410388	-0.00236767	0.412756	0.451903	0.653417	0.631736	0.913372	0.631688	0.262188	0.423072	0.0595456	0.290269	0.48849	FALSE
TCF4 missense	83	7063	-0.0744608	0.0263794	-0.10084	0.747732	0.787235	-0.128166	0.134861	0.128094	0.263946	-0.096984	0.000525274	0.455436	0.48849	FALSE
FOXA2 missense	50	7101	-0.0815148	0.0132101	-0.0947249	0.561655	0.580618	-0.163181	0.168653	0.163145	0.26403	-0.0920246	0.0574477	0.965276	0.48849	FALSE
RXRA 3D hotspot 225-458-2acl	21	7108	-0.1646	-0.00480923	-0.15979	0.729711	0.656272	-0.243401	0.218978	0.243482	0.264729	-0.160244	0.532722	0.168317	0.48849	FALSE
PRDM14 truncating	11	7061	-0.249691	0.0102834	-0.259975	1.08219	0.763806	-0.340125	0.24023	0.340367	0.26495	-0.257084	0.106581	0.121453	0.48849	FALSE
MAZ p.A11fs	11	7119	-0.266651	0.0254748	-0.292125	0.640002	0.852437	-0.342799	0.456445	0.342694	0.26501	-0.28686	0.563895	0.928203	0.48849	FALSE
GATA3 missense	86	6972	0.107725	0.0233682	0.0843572	0.668351	0.702129	0.120213	0.126217	0.120145	0.265304	0.0848068	0.197652	0.0486386	0.48849	FALSE
SMAD4 interface SMAD2	100	6912	-0.0883627	0.0115843	-0.099947	0.887994	0.747385	-0.133342	0.112554	0.133729	0.266977	-0.0838165	0.000133058	0.039911	0.490337	FALSE
CTCF p.S354F // CTCF p.354	3	7006	-0.455609	0.0102334	-0.465843	0.94792	0.736315	-0.632608	0.491437	0.632668	0.267364	-0.471478	0.653482	0.00160793	0.490337	FALSE
NFE2 missense	42	7110	-0.13877	-0.00750637	-0.131264	0.742038	0.794719	-0.16523	0.176896	0.16517	0.268185	-0.136122	0.000693481	0.510508	0.490872	FALSE
SMAD4 interface SMAD1	101	6912	-0.0864099	0.0115843	-0.0979942	0.881586	0.747385	-0.130752	0.111157	0.131116	0.271818	-0.0825433	0.000108827	0.0402196	0.496543	FALSE
EBF1 p.381	3	7063	-0.46352	-0.00307619	-0.460443	0.695711	0.709891	-0.648615	0.661832	0.648612	0.27328	-0.448965	0.0206188	0.0721014	0.498232	FALSE
TP53 p.P59fs	15	4377	-0.1003	0.105233	-0.205533	0.778518	0.735716	-0.279312	0.264006	0.279365	0.27423	-0.208165	0.733658	0.311199	0.498985	FALSE
FLI1 interface ETV6	6	7090	-0.348547	0.000189083	-0.348736	0.471019	0.764628	-0.456186	0.740387	0.456086	0.276	-0.34009	0.111209	0.104985	0.499754	FALSE
ELF1 missense	61	7086	0.104366	0.00249308	0.101873	0.804802	0.716392	0.142047	0.126582	0.142203	0.276616	0.100332	0.424969	0.082349	0.499754	FALSE
ARNT interface HIF1A	3	7096	-0.48096	0.0112526	-0.492212	0.158621	0.753662	-0.653182	3.10308	0.653094	0.276742	-0.473082	0.00284557	0.0509694	0.499754	FALSE
SREBF1 missense	60	7093	0.110597	0.010322	0.100275	0.949379	0.702052	0.142346	0.105622	0.142832	0.277039	0.0993374	0.929026	0.317713	0.499754	FALSE
TP53 p.I251T	3	4377	-0.361515	0.105233	-0.466748	1.0357	0.735716	-0.634271	0.450657	0.634414	0.277346	-0.461858	0.764188	0.326243	0.499754	FALSE
ZEB1 truncating	38	6972	-0.116119	-0.00278721	-0.113332	0.707746	0.625483	-0.181058	0.160131	0.181192	0.278307	-0.110444	0.834602	0.0695608	0.500121	FALSE
SP3 p.596	4	7104	-0.392711	-0.011929	-0.380782	0.536	0.704127	-0.540834	0.710415	0.540786	0.278627	-0.381165	0.106487	0.000388136	0.500121	FALSE
FOS truncating	3	7132	-0.396351	0.0207562	-0.417107	0.177868	0.677012	-0.61618	2.34504	0.616099	0.280089	-0.422195	0.0299154	0.866851	0.501548	FALSE
NFE2L2 p.T80K	3	6974	0.450217	0.0107031	0.439514	1.28836	0.745359	0.589499	0.341142	0.589667	0.281051	0.464128	0.00753991	0.538315	0.501548	FALSE
HNF4A interface HNF4A	19	7067	-0.106552	0.00625093	-0.112803	0.498533	0.452004	-0.249492	0.226269	0.249561	0.281263	-0.111931	0.331243	0.614841	0.501548	FALSE
TP53 p.C277F	5	4377	0.452127	0.105233	0.346893	0.654546	0.735716	0.47155	0.529976	0.471505	0.281584	0.35468	0.812783	0.312863	0.501548	FALSE
FLI1 missense	65	7090	-0.107307	0.000189083	-0.107496	0.754782	0.764628	-0.140602	0.142419	0.140586	0.283015	-0.102297	0.131184	0.100554	0.503131	FALSE
KLF5 DNA/RNA aff. enabling // KLF5 p.419	10	7097	-0.251729	0.0176616	-0.269391	0.653143	0.809207	-0.332981	0.412453	0.332907	0.286491	-0.27281	0.0465897	0.0647082	0.508337	FALSE
TP53 p.N263fs	4	4377	-0.276121	0.105233	-0.381354	0.204058	0.735716	-0.518508	1.86885	0.518344	0.289144	-0.390314	0.792498	0.32644	0.509604	FALSE
TP53 p.H179L	3	4377	-0.333833	0.105233	-0.439067	0.638866	0.735716	-0.596822	0.687259	0.596788	0.289488	-0.450337	0.775433	0.322059	0.509604	FALSE
GATA3 p.W328fs // GATA3 p.W329fs	3	6972	0.472232	0.0233682	0.448864	0.367043	0.702129	0.639357	1.22292	0.63929	0.289955	0.42903	0.167206	0.0507801	0.509604	FALSE
TP53 p.P190L	7	4377	-0.190682	0.105233	-0.295915	0.489708	0.735716	-0.402368	0.604269	0.402214	0.290111	-0.294367	0.796915	0.29854	0.509604	FALSE
GATA3 p.P425fs	4	6972	-0.337045	0.0233682	-0.360414	1.02061	0.702129	-0.513193	0.353137	0.513315	0.290775	-0.371024	0.173123	0.0521474	0.509604	FALSE
ESR1 interface NR2C1	6	7072	0.355226	0.0227464	0.33248	0.50234	0.745607	0.446004	0.661862	0.445918	0.290887	0.321593	0.433973	0.0607444	0.509604	FALSE
HNF4A interface NR3C1	6	7067	-0.189951	0.00625093	-0.196202	0.51526	0.452004	-0.434026	0.380783	0.434072	0.292461	-0.194399	0.301058	0.660261	0.509604	FALSE
ERG truncating	15	7087	-0.224256	0.00340932	-0.227665	0.676589	0.83359	-0.273206	0.336489	0.273114	0.292525	-0.226847	0.795112	0.322918	0.509604	FALSE
TP53 AURKA phosphorylation loss	18	4377	-0.0777345	0.105233	-0.182968	0.864327	0.735716	-0.248511	0.211688	0.248694	0.292682	-0.183031	0.760485	0.259307	0.509604	FALSE
TP53 p.T155N	3	4377	-0.330311	0.105233	-0.435545	0.551328	0.735716	-0.592061	0.789992	0.592001	0.292697	-0.447335	0.808491	0.323228	0.509604	FALSE
TP53 p.131	3	4377	-0.335538	0.105233	-0.440771	0.541026	0.735716	-0.599168	0.814696	0.599105	0.294123	-0.445877	0.790803	0.325058	0.511128	FALSE
ZNF263 truncating	9	7107	0.279872	0.005786	0.274086	0.908157	0.790342	0.346731	0.301804	0.346794	0.295489	0.275825	0.519875	0.0179074	0.512542	FALSE
POU3F2 missense	29	7121	-0.163472	0.0103698	-0.173842	0.723931	0.779478	-0.223083	0.240136	0.223023	0.297469	-0.151145	0.000615455	0.912569	0.514732	FALSE
POU2F1 interface TLX2	3	7096	0.399864	-0.0020886	0.401952	0.528563	0.668325	0.601464	0.760462	0.601432	0.297861	0.401652	0.00981216	0.538433	0.514732	FALSE
ESR1 interface NCOA1	4	7072	-0.362244	0.0227464	-0.38499	1.09621	0.745607	-0.516217	0.3512	0.516344	0.300103	-0.386587	0.437805	0.059172	0.517499	FALSE
SRF missense	23	7133	0.181383	0.00908796	0.172296	0.792981	0.768242	0.22425	0.217276	0.224273	0.300577	0.166158	0.644301	0.0144537	0.517499	FALSE
SMAD3 hotspot S418 // SMAD3 hotspot S422 // SMAD3 hotspot S423	8	7093	0.32851	0.0178004	0.31071	0.918054	0.833442	0.372764	0.338444	0.372803	0.302284	0.303594	0.000138953	0.000149316	0.51927	FALSE
TP53 interface MDM2 // TP53 hotspot S33 // TP53 p.P27S // TP53 p.27	3	4377	-0.325392	0.105233	-0.430625	0.860643	0.735716	-0.585266	0.500353	0.585315	0.302725	-0.438308	0.791031	0.343197	0.51927	FALSE
TP53 interface MDM4 // TP53 hotspot S20	3	4377	-0.325392	0.105233	-0.430625	0.860643	0.735716	-0.585266	0.500353	0.585315	0.302725	-0.438308	0.791031	0.343197	0.51927	FALSE
POU2F1 truncating	7	7096	-0.252269	-0.0020886	-0.250181	0.383521	0.668325	-0.374446	0.652326	0.374339	0.305116	-0.259071	0.00999311	0.546686	0.521462	FALSE
NFYA truncating	4	7131	0.43048	0.00313712	0.427343	0.850914	0.829481	0.515187	0.502216	0.515193	0.305127	0.425361	0.777148	0.0124068	0.521462	FALSE
SMAD3 p.E149K // SMAD3 p.149	3	7093	0.49673	0.0178004	0.47893	0.502056	0.833442	0.574693	0.953937	0.574641	0.306861	0.490815	0.000126084	0.000134518	0.52286	FALSE
ERG p.254 // ERG p.377	3	7087	-0.492625	0.00340932	-0.496034	1.02739	0.83359	-0.595014	0.48281	0.595058	0.307727	-0.491148	0.795167	0.321232	0.52286	FALSE
SMAD3 interface SMAD4	17	7093	0.230098	0.0178004	0.212298	0.746053	0.833442	0.254782	0.284562	0.254725	0.307817	0.205976	0.0001352	0.000185235	0.52286	FALSE
TP53 p.Y107D	3	4377	-0.324146	0.105233	-0.42938	0.642898	0.735716	-0.583653	0.667882	0.583622	0.308198	-0.433092	0.801981	0.334486	0.52286	FALSE
SP3 missense	45	7104	-0.119496	-0.011929	-0.107567	0.718146	0.704127	-0.152748	0.149785	0.152767	0.309753	-0.106866	0.0824011	0.000293084	0.524539	FALSE
MYC missense	11	7143	0.226321	0.00807158	0.218249	0.619209	0.734874	0.297049	0.352464	0.296989	0.31074	0.224656	0.0523152	0.00459525	0.524843	FALSE
WT1 p.S152fs // WT1 p.S169fs // WT1 p.S364fs // WT1 p.S381fs	4	7149	-0.390343	0.0169966	-0.40734	0.45361	0.800899	-0.508675	0.897995	0.508603	0.311602	-0.405023	0.0385057	0.0018794	0.524843	FALSE
SMAD4 p.355	4	6912	-0.354258	0.0115843	-0.365842	0.821347	0.747385	-0.489474	0.445417	0.489496	0.312159	-0.377399	0.000119912	0.0518427	0.524843	FALSE
PPARA missense	42	7112	-0.135405	-0.00817094	-0.127234	0.83604	0.79129	-0.160739	0.152186	0.160793	0.312195	-0.123804	0.0718021	0.270877	0.524843	FALSE
REL missense	48	7107	0.120326	-0.00303758	0.123364	0.849546	0.817736	0.150821	0.145211	0.15086	0.313441	0.119419	0.13773	0.00948104	0.525984	FALSE
BACH1 p.E281K // BACH1 p.281	3	7077	0.472652	0.0227975	0.449855	0.523585	0.755907	0.595163	0.859182	0.595119	0.315335	0.438275	0.0387737	0.874223	0.528208	FALSE
HNF4A p.E472K	3	7067	-0.24961	0.00625093	-0.255861	0.330582	0.452004	-0.566095	0.773971	0.566058	0.317579	-0.260964	0.321743	0.673857	0.530275	FALSE
ETS1 truncating	5	7111	0.369133	0.00243989	0.366693	0.563461	0.804197	0.456039	0.650787	0.455974	0.317712	0.359304	0.680751	0.00467747	0.530275	FALSE
TP53 p.P151T	3	4377	-0.321815	0.105233	-0.427048	0.353029	0.735716	-0.580555	1.20967	0.580453	0.318369	-0.424016	0.777932	0.330357	0.530418	FALSE
TP53 p.143	8	4377	-0.154548	0.105233	-0.259781	0.66655	0.735716	-0.353151	0.38974	0.3531	0.319089	-0.259441	0.781032	0.311678	0.53053	FALSE
ATF2 truncating	6	7113	-0.324108	0.00836152	-0.332469	0.504451	0.817718	-0.40667	0.659071	0.406582	0.31958	-0.332387	0.262662	0.683271	0.53053	FALSE
NFE2L2 p.27	3	6974	0.415999	0.0107031	0.405296	0.73298	0.745359	0.543762	0.552943	0.54376	0.321766	0.426477	0.008333	0.537325	0.532477	FALSE
TP53 p.145	4	4377	-0.263139	0.105233	-0.368372	0.612432	0.735716	-0.500752	0.601492	0.500699	0.322439	-0.36423	0.780182	0.335218	0.532477	FALSE
ESR1 interface THRA	14	7072	0.217133	0.0227464	0.194387	0.600296	0.745607	0.260794	0.323819	0.26071	0.322474	0.197288	0.399722	0.0637952	0.532477	FALSE
FOXI1 truncating	9	7087	-0.234462	0.0299229	-0.264385	0.603073	0.7641	-0.346082	0.438396	0.346009	0.326039	-0.250116	0.00317423	0.0634145	0.537407	FALSE
SMAD4 p.D494G	4	6912	-0.355821	0.0115843	-0.367405	0.467256	0.747385	-0.491653	0.786304	0.491588	0.331098	-0.362858	0.000104266	0.0558035	0.544234	FALSE
TP53 p.E271V	3	4377	-0.29397	0.105233	-0.399204	0.490918	0.735716	-0.542675	0.813179	0.542606	0.331569	-0.412839	0.782925	0.322296	0.544234	FALSE
TP53 p.R249S	23	4377	-0.0426713	0.105233	-0.147905	0.971342	0.735716	-0.200663	0.152268	0.201035	0.332487	-0.149374	0.829905	0.266501	0.544234	FALSE
TBP inframe indel	29	7113	-0.148017	-0.000902505	-0.147115	0.622738	0.818471	-0.179892	0.236239	0.179743	0.333041	-0.147306	0.684246	0.11906	0.544234	FALSE
CEBPA interface CEBPA // CEBPA interface CEBPD // CEBPA interface CEBPG	6	7121	0.279142	0.00504518	0.274097	0.664271	0.687317	0.398802	0.412628	0.398793	0.333694	0.271472	0.654472	0.364839	0.544234	FALSE
ESR1 interface ESR1	24	7072	-0.129607	0.0227464	-0.152353	0.839259	0.745607	-0.204246	0.181533	0.204335	0.334155	-0.14732	0.408546	0.0433566	0.544234	FALSE
SMAD4 p.R531Q	4	6912	-0.368733	0.0115843	-0.380317	0.279715	0.747385	-0.508959	1.35966	0.508864	0.334728	-0.36012	0.000110294	0.053172	0.544234	FALSE
TP53 p.V143G	3	4377	-0.306002	0.105233	-0.411235	0.427087	0.735716	-0.559044	0.962883	0.558959	0.335198	-0.409549	0.77291	0.316336	0.544234	FALSE
TP53 p.111	7	4377	-0.163575	0.105233	-0.268809	1.01418	0.735716	-0.365145	0.26505	0.36537	0.335851	-0.268061	0.760009	0.356732	0.544234	FALSE
GLI2 truncating	14	6958	-0.201526	0.00379928	-0.205325	0.888605	0.750861	-0.273351	0.231064	0.273453	0.336045	-0.193253	0.00134529	0.857988	0.544234	FALSE
TP53 p.N107fs	3	4377	-0.289918	0.105233	-0.395151	1.25427	0.735716	-0.536864	0.315044	0.537098	0.33802	-0.407546	0.831479	0.324303	0.546335	FALSE
TCF12 interface TAL1 // TCF12 interface ASCL4	5	7074	0.283205	0.0029203	0.280285	0.588396	0.680525	0.411895	0.476353	0.411865	0.339054	0.290802	0.000158878	0.0841268	0.546335	FALSE
TCF12 interface OLIG3 // TCF12 interface TWIST2 // TCF12 interface NEUROG3	5	7074	0.283205	0.0029203	0.280285	0.588396	0.680525	0.411895	0.476353	0.411865	0.339054	0.290802	0.000158878	0.0841268	0.546335	FALSE
SP1 missense	53	7098	-0.083197	0.0120511	-0.095248	0.808975	0.738952	-0.128803	0.117739	0.128896	0.339451	-0.0974459	0.615055	0.336483	0.546335	FALSE
TP53 p.S90fs	3	4377	-0.297014	0.105233	-0.402247	0.824574	0.735716	-0.54671	0.487824	0.546742	0.339698	-0.405829	0.766556	0.339884	0.546335	FALSE
REL p.219	3	7107	0.404442	-0.00303758	0.407479	0.919825	0.817736	0.498283	0.442996	0.498302	0.342514	0.448583	0.15517	0.00801125	0.549911	FALSE
GLI2 missense	187	6958	0.0506824	0.00379928	0.0468831	0.837116	0.750861	0.0622426	0.0560055	0.0624391	0.346452	0.0525528	0.00117069	0.742026	0.555273	FALSE
ESR2 truncating	4	7099	0.422289	0.0103117	0.411977	1.47776	0.856089	0.48103	0.278786	0.481231	0.347051	0.40249	0.0168889	0.00480341	0.555273	FALSE
ESR1 truncating	14	7072	-0.169918	0.0227464	-0.192664	0.61719	0.745607	-0.258474	0.312164	0.258399	0.34785	-0.187208	0.431011	0.0557571	0.555594	FALSE
TP53 p.259	7	4377	-0.154357	0.105233	-0.259591	0.827001	0.735716	-0.352778	0.313894	0.352841	0.348939	-0.260796	0.769021	0.313184	0.556377	FALSE
TP53 p.H214R	12	4377	0.304883	0.105233	0.19965	0.801569	0.735716	0.271305	0.249074	0.271368	0.349962	0.198868	0.822069	0.300399	0.556945	FALSE
RUNX1 p.138	4	7043	0.375873	-0.0106132	0.386486	0.533557	0.80282	0.481468	0.724358	0.481411	0.350496	0.37499	0.191754	0.885174	0.556945	FALSE
FOXA1 p.D226N	4	7067	0.36466	0.0285778	0.336082	0.509369	0.748536	0.449037	0.6598	0.448986	0.352471	0.347991	0.00919415	0.198254	0.558378	FALSE
RXRA interface F1D8P7	11	7108	-0.185317	-0.00480923	-0.180508	0.60492	0.656272	-0.27508	0.2984	0.275051	0.352601	-0.184213	0.5181	0.178447	0.558378	FALSE
TP53 p.S109fs // TP53 p.S148fs // TP53 p.S241fs	7	4377	-0.162621	0.105233	-0.267855	0.56338	0.735716	-0.364177	0.475442	0.364074	0.354315	-0.25794	0.747518	0.320942	0.560137	FALSE
STAT2 interface STAT1	6	7080	-0.298788	0.00670675	-0.305495	1.40633	0.830492	-0.367606	0.217229	0.367848	0.355304	-0.313632	0.0888859	0.0084694	0.560306	FALSE
ATF2 missense	42	7113	-0.105391	0.00836152	-0.113752	0.806466	0.817718	-0.13912	0.14105	0.139109	0.35563	-0.116929	0.265665	0.639046	0.560306	FALSE
PLAG1 p.386	4	7089	-0.356092	0.0138648	-0.369956	0.365003	0.796174	-0.464745	1.01357	0.464668	0.357008	-0.366561	0.0108531	0.0667571	0.561524	FALSE
EZH2 interface HIST1H3J // EZH2 p.620 // EZH2 p.659	4	7038	-0.386424	-0.000757567	-0.385666	1.47646	0.81527	-0.472824	0.26121	0.473053	0.360391	-0.373301	0.149417	0.810082	0.565886	FALSE
SMAD4 p.351	8	6912	0.242761	0.0115843	0.231176	1.06023	0.747385	0.309155	0.218044	0.309314	0.363012	0.240383	0.000117045	0.0523533	0.569032	FALSE
TP53 p.K164E // TP53 p.164 // TP53 PTM acetylation loss	4	4377	-0.228682	0.105233	-0.333915	0.346172	0.735716	-0.453985	0.964592	0.453864	0.363621	-0.33433	0.785548	0.318843	0.569032	FALSE
USF2 missense	19	7138	0.153944	0.0112407	0.142703	0.797126	0.637719	0.223613	0.179022	0.223771	0.364578	0.132885	0.00111553	0.700079	0.569569	FALSE
TP53 p.R273S	4	4377	-0.228114	0.105233	-0.333347	0.690645	0.735716	-0.453111	0.48266	0.453092	0.366277	-0.332587	0.777514	0.319505	0.571262	FALSE
STAT3 p.Y640F // STAT3 p.640	3	7070	0.379762	0.00858331	0.371179	0.920352	0.722323	0.513823	0.403301	0.513868	0.367242	0.376069	0.467372	0.0178038	0.571805	FALSE
TCF4 truncating	14	7063	-0.172357	0.0263794	-0.198736	0.839471	0.787235	-0.252416	0.23674	0.252448	0.368878	-0.189244	0.000989867	0.390159	0.57339	FALSE
RREB1 p.G783V // RREB1 p.783	8	7011	-0.205338	-0.00625802	-0.19908	0.404741	0.718286	-0.277254	0.49187	0.27716	0.37089	-0.227126	2.47022e-05	0.661968	0.575554	FALSE
TCF12 p.A176fs // TCF12 p.A180fs	6	7074	0.269635	0.0029203	0.266714	1.06016	0.680525	0.391727	0.251579	0.391925	0.372707	0.24768	0.000143447	0.0761358	0.577408	FALSE
TP53 p.H179D	4	4377	-0.226393	0.105233	-0.331627	0.704476	0.735716	-0.450767	0.470743	0.450754	0.37397	-0.327291	0.773517	0.330235	0.578399	FALSE
TP53 p.C238R	3	4377	-0.282859	0.105233	-0.388093	0.881169	0.735716	-0.527451	0.440429	0.527504	0.376715	-0.375902	0.803883	0.323157	0.57946	FALSE
ARNTL interface CLOCK	4	7117	-0.349772	-0.00770235	-0.34207	1.27206	0.770354	-0.443881	0.268909	0.444042	0.377014	-0.340556	0.264606	0.784587	0.57946	FALSE
GATA3 p.S402P // GATA3 p.402	3	6972	-0.328178	0.0233682	-0.351547	0.546289	0.702129	-0.500715	0.643518	0.500687	0.377508	-0.357732	0.174897	0.0523098	0.57946	FALSE
EGR1 hotspot S378	7	7089	-0.26019	0.0232116	-0.283402	0.37889	0.843798	-0.335978	0.747978	0.335864	0.377672	-0.28127	0.00651448	0.179788	0.57946	FALSE
FOXI1 p.S129L // FOXI1 p.129	4	7087	0.347793	0.0299229	0.31787	0.734073	0.7641	0.416013	0.433023	0.416006	0.377778	0.336862	0.00293631	0.0633076	0.57946	FALSE
TP53 p.S215G	3	4377	-0.277501	0.105233	-0.382735	0.978021	0.735716	-0.52013	0.391336	0.520221	0.379583	-0.373638	0.808826	0.323369	0.581268	FALSE
PBX1 truncating	7	7096	-0.215172	0.00731086	-0.222483	0.678755	0.660515	-0.336824	0.32778	0.336832	0.381383	-0.218528	0.0100358	0.00843405	0.581635	FALSE
STAT3 interface BLK	7	7070	0.24255	0.00858331	0.233967	0.894835	0.722323	0.323835	0.261463	0.323909	0.381487	0.239056	0.515727	0.0174253	0.581635	FALSE
TP53 p.G154V	5	4377	-0.185827	0.105233	-0.29106	0.780964	0.735716	-0.395592	0.372694	0.395615	0.381703	-0.288092	0.790677	0.30013	0.581635	FALSE
TP53 p.P58fs	4	4377	-0.207929	0.105233	-0.313163	0.611246	0.735716	-0.425702	0.512335	0.425657	0.383679	-0.320704	0.777624	0.308883	0.58345	FALSE
RXRA interface NR2F6	14	7108	-0.156518	-0.00480923	-0.151709	0.734553	0.656272	-0.231114	0.206532	0.231167	0.384151	-0.152979	0.523954	0.185974	0.58345	FALSE
IRF2 p.A41V // IRF2 p.41	5	7091	-0.327517	-0.00430746	-0.323209	0.765632	0.840498	-0.384563	0.422147	0.384545	0.385765	-0.326053	0.0388135	0.2276	0.584942	FALSE
SP1 truncating	10	7098	0.210747	0.0120511	0.198696	0.883484	0.738952	0.268816	0.224901	0.268889	0.389274	0.201442	0.680962	0.315257	0.5893	FALSE
SMAD4 interface SMAD4	97	6912	-0.0705165	0.0115843	-0.0821008	0.924041	0.747385	-0.109455	0.0888498	0.109851	0.391094	-0.0657794	0.000121985	0.0516517	0.591092	FALSE
ZNF423 p.760	3	6936	0.301937	-0.00236767	0.304305	0.596534	0.653417	0.465724	0.510122	0.465713	0.391927	0.323095	0.061198	0.28228	0.591388	FALSE
STAT3 p.R631fs // STAT3 p.R728fs // STAT3 p.R729fs	3	7070	0.354268	0.00858331	0.345685	0.668914	0.722323	0.478584	0.516786	0.478574	0.394273	0.355265	0.480099	0.0167923	0.593962	FALSE
YBX1 p.149	3	7128	0.372932	0.0126825	0.360249	1.04252	0.757062	0.475792	0.345556	0.475852	0.39752	0.370073	0.750442	0.162238	0.597882	FALSE
TP53 interface EP300	7	4377	-0.126306	0.105233	-0.231539	0.684196	0.735716	-0.314742	0.338411	0.314713	0.399891	-0.234328	0.810563	0.35421	0.599522	FALSE
FOXO3 hotspot S315	3	7129	0.423166	0.0116803	0.411486	0.695104	0.855333	0.481105	0.591977	0.481082	0.40126	0.414885	0.974446	0.717449	0.599522	FALSE
GATA3 p.K376fs // GATA3 p.K377fs	4	6972	-0.279123	0.0233682	-0.302491	0.323955	0.702129	-0.430893	0.933744	0.43082	0.401565	-0.294489	0.165821	0.0521481	0.599522	FALSE
IKZF1 p.79	3	7068	0.400477	0.00703222	0.393445	0.541454	0.802483	0.490322	0.726645	0.490284	0.402152	0.388211	0.991997	0.0565874	0.599522	FALSE
GLI2 p.P63S	3	6958	-0.396324	0.00379928	-0.400123	0.294674	0.750861	-0.532951	1.35785	0.532886	0.40337	-0.362228	0.00124362	0.879075	0.599522	FALSE
TP53 p.262	9	4377	-0.103928	0.105233	-0.209162	0.53166	0.735716	-0.284421	0.393413	0.284297	0.403967	-0.204904	0.807198	0.348643	0.599522	FALSE
TP53 p.G262V	9	4377	-0.103928	0.105233	-0.209162	0.53166	0.735716	-0.284421	0.393413	0.284297	0.403967	-0.204904	0.807198	0.348643	0.599522	FALSE
TFAP2A truncating	7	7104	0.260693	-0.0147411	0.275434	0.728302	0.851241	0.323605	0.378187	0.323568	0.404141	0.268484	0.168187	0.0675095	0.599522	FALSE
STAT3 p.384	3	7070	0.353677	0.00858331	0.345094	0.43831	0.722323	0.477798	0.787327	0.477755	0.404412	0.347819	0.469157	0.0175062	0.599522	FALSE
STAT1 interface STAT3	6	7068	-0.273321	0.0134036	-0.286724	0.273097	0.798822	-0.359046	1.0499	0.358934	0.404424	-0.271827	0.841422	0.000213263	0.599522	FALSE
FOSL2 interface CREB5	6	7106	0.232193	-0.00251162	0.234705	0.310319	0.685512	0.342475	0.756335	0.342379	0.407251	0.231905	0.0320666	0.190378	0.602446	FALSE
RUNX1 p.177	3	7043	0.369557	-0.0106132	0.380171	1.26183	0.80282	0.473445	0.301285	0.473544	0.407695	0.383978	0.210873	0.892912	0.602446	FALSE
TP53 p.341	5	4377	-0.160285	0.105233	-0.265519	0.238701	0.735716	-0.361046	1.11235	0.360899	0.408626	-0.27205	0.789595	0.319699	0.602861	FALSE
TP53 p.266	29	4377	-0.00685155	0.105233	-0.112085	0.717053	0.735716	-0.152372	0.156313	0.152348	0.410935	-0.112726	0.844774	0.303726	0.605305	FALSE
TP53 p.P85fs	3	4377	-0.247333	0.105233	-0.352567	0.872953	0.735716	-0.479171	0.403878	0.479216	0.414134	-0.347167	0.755674	0.318423	0.608454	FALSE
IKZF1 p.312 // IKZF1 p.399	3	7068	0.365318	0.00703222	0.358286	1.23299	0.802483	0.446386	0.290583	0.446472	0.41542	0.377542	0.983325	0.054554	0.608454	FALSE
TP53 p.P118fs // TP53 p.P250fs	3	4377	-0.237151	0.105233	-0.342385	1.0313	0.735716	-0.465274	0.331994	0.465376	0.415575	-0.3461	0.803455	0.32796	0.608454	FALSE
RELA missense	43	7103	-0.0771879	0.00594616	-0.083134	0.675074	0.709003	-0.117287	0.123148	0.117255	0.415695	-0.0882102	0.305868	0.00149295	0.608454	FALSE
TP53 p.D281V	3	4377	-0.241806	0.105233	-0.347039	0.430079	0.735716	-0.471774	0.80692	0.471703	0.416896	-0.344991	0.788477	0.328187	0.608516	FALSE
RUNX2 hotspot S465	5	7074	-0.251691	0.00588739	-0.257578	1.06417	0.71648	-0.359383	0.242047	0.359505	0.417049	-0.25998	0.00018417	0.0991559	0.608516	FALSE
ATF3 interface NFATC1	3	7145	0.369636	0.0036313	0.366005	0.34162	0.789571	0.463602	1.07138	0.463549	0.419108	0.368468	0.993008	0.357425	0.610561	FALSE
MEF2A p.342del // MEF2A p.350del // MEF2A p.410del // MEF2A p.412del // MEF2A p.418del	6	7111	0.290302	-0.00635796	0.29666	0.90361	0.835806	0.354918	0.328305	0.354939	0.423477	0.273053	0.759932	9.60359e-05	0.614534	FALSE
RUNX1 missense	81	7043	0.0646134	-0.0106132	0.0752266	0.80469	0.80282	0.0937005	0.0934852	0.093703	0.424612	0.0716708	0.181286	0.940542	0.614534	FALSE
TP53 p.C176F	20	4377	-0.0257973	0.105233	-0.131031	0.789613	0.735716	-0.178041	0.165943	0.1781	0.424841	-0.131659	0.782865	0.324692	0.614534	FALSE
NRF1 p.E409K // NRF1 p.409	3	7114	-0.357498	-0.00816403	-0.349334	0.251713	0.786093	-0.444448	1.38783	0.444392	0.42516	-0.361223	0.00353153	3.91675e-07	0.614534	FALSE
STAT3 truncating	10	7070	0.189704	0.00858331	0.181121	0.956405	0.722323	0.250628	0.189377	0.250748	0.425161	0.182334	0.483755	0.0160088	0.614534	FALSE
EZH2 hotspot Y641	8	7038	-0.233698	-0.000757567	-0.23294	0.945228	0.81527	-0.285673	0.246438	0.285722	0.425809	-0.22977	0.140079	0.780341	0.614534	FALSE
POU3F2 truncating	11	7121	-0.184567	0.0103698	-0.194937	1.05027	0.779478	-0.249944	0.185607	0.250087	0.427553	-0.186607	0.000631892	0.901652	0.615482	FALSE
TP53 p.R158C	3	4377	0.42994	0.105233	0.324707	0.594035	0.735716	0.441383	0.546612	0.441348	0.428683	0.336471	0.793975	0.322716	0.615482	FALSE
WT1 truncating	10	7149	-0.190455	0.0169966	-0.207452	0.52131	0.800899	-0.259118	0.397944	0.259024	0.428858	-0.200287	0.0413802	0.00203991	0.615482	FALSE
FOXA1 p.247	5	7067	0.286338	0.0285778	0.25776	1.13794	0.748536	0.344225	0.226516	0.344352	0.429119	0.264781	0.00758439	0.193439	0.615482	FALSE
EZH2 interface EED	10	7038	-0.216556	-0.000757567	-0.215798	0.990839	0.81527	-0.264615	0.217794	0.264695	0.430374	-0.203621	0.142099	0.776969	0.616224	FALSE
PPARA truncating	4	7112	0.301479	-0.00817094	0.30965	0.616254	0.79129	0.391355	0.502471	0.391323	0.430964	0.311607	0.0522745	0.269794	0.616224	FALSE
TP53 p.R213Q	5	4377	-0.156442	0.105233	-0.261676	0.202417	0.735716	-0.355825	1.29276	0.355675	0.431807	-0.25877	0.78703	0.325491	0.61627	FALSE
ARNTL hotspot S78	5	7117	-0.281979	-0.00770235	-0.274277	1.09372	0.770354	-0.355939	0.250774	0.35604	0.432325	-0.270825	0.267099	0.80642	0.61627	FALSE
TP53 p.G245S	33	4377	0.0111845	0.105233	-0.0940489	0.788419	0.735716	-0.127764	0.119288	0.127833	0.434952	-0.100596	0.795331	0.362477	0.618206	FALSE
TP53 p.L101fs // TP53 p.L194fs // TP53 p.L62fs	5	4377	-0.159833	0.105233	-0.265067	0.612476	0.735716	-0.360334	0.432779	0.360284	0.435015	-0.257114	0.768717	0.325854	0.618206	FALSE
PAX5 missense	53	7103	-0.0780822	0.0178502	-0.0959324	0.898649	0.825094	-0.11619	0.106752	0.116268	0.437214	-0.0884424	0.0796377	0.0618131	0.620381	FALSE
TP53 p.T211I	3	4377	-0.218862	0.105233	-0.324095	0.355764	0.735716	-0.440594	0.910983	0.440517	0.440935	-0.327479	0.787852	0.314582	0.624705	FALSE
SOX2 missense	24	7132	-0.125573	-0.00521242	-0.12036	0.724252	0.735081	-0.163745	0.166186	0.163737	0.443034	-0.115275	0.225215	0.0265185	0.626723	FALSE
TP53 p.214	13	4377	0.263208	0.105233	0.157974	0.782016	0.735716	0.214684	0.202009	0.214722	0.445074	0.156123	0.831799	0.305592	0.62865	FALSE
NFYA missense	26	7131	0.119586	0.00313712	0.116449	0.919072	0.829481	0.140332	0.126703	0.140388	0.446226	0.124218	0.79044	0.0120444	0.629164	FALSE
TP53 p.257	3	4377	0.441067	0.105233	0.335834	0.532135	0.735716	0.456522	0.631107	0.456472	0.446794	0.323427	0.807114	0.323174	0.629164	FALSE
SMAD4 p.132	5	6912	-0.273069	0.0115843	-0.284653	0.977601	0.747385	-0.380788	0.291175	0.380866	0.447652	-0.253705	0.000118322	0.056382	0.629418	FALSE
TP63 interface TP63	29	6997	-0.0890227	0.0104275	-0.0994502	0.616086	0.678513	-0.146622	0.161422	0.146571	0.45121	-0.0951403	0.856773	0.173519	0.631724	FALSE
TCF4 p.P487fs	4	7063	-0.284205	0.0263794	-0.310584	1.0803	0.787235	-0.394451	0.287497	0.394525	0.451401	-0.296423	0.00100268	0.378914	0.631724	FALSE
EZH2 missense	106	7038	-0.0668287	-0.000757567	-0.0660711	0.898832	0.81527	-0.080914	0.0735078	0.081042	0.451771	-0.060187	0.09618	0.767366	0.631724	FALSE
PAX6 missense	52	7072	-0.0701913	0.00897475	-0.079166	0.872285	0.719822	-0.109796	0.0907571	0.10998	0.452016	-0.0754588	0.0189758	0.219562	0.631724	FALSE
HLF truncating	3	7120	0.330832	0.0168518	0.31398	1.0231	0.79083	0.396989	0.306892	0.397026	0.453464	0.342453	0.0231194	0.442784	0.632224	FALSE
TFAP2A p.185 // TFAP2A p.187 // TFAP2A p.191	3	7104	-0.399166	-0.0147411	-0.384425	1.06992	0.851241	-0.451568	0.359304	0.451605	0.453736	-0.368312	0.180491	0.0652551	0.632224	FALSE
PLAG1 p.23	3	7089	0.351499	0.0138648	0.337635	0.559986	0.796174	0.424101	0.602934	0.424071	0.45575	0.342819	0.0101551	0.0657301	0.634079	FALSE
EZH2 p.641	5	7038	-0.277199	-0.000757567	-0.276442	0.711725	0.81527	-0.339103	0.388411	0.33908	0.457623	-0.270955	0.141079	0.793206	0.635676	FALSE
TP53 p.272	20	4377	-0.0186073	0.105233	-0.123841	0.819206	0.735716	-0.16824	0.151172	0.168327	0.4585	-0.122343	0.739386	0.321371	0.635676	FALSE
TP53 p.H193Y	8	4377	-0.0837478	0.105233	-0.188981	0.954897	0.735716	-0.256727	0.197908	0.256867	0.45955	-0.19272	0.826542	0.32686	0.635676	FALSE
TP53 p.246	9	4377	-0.0745172	0.105233	-0.179751	0.583911	0.735716	-0.244403	0.307839	0.244321	0.459638	-0.181509	0.824511	0.352437	0.635676	FALSE
TP53 p.113	7	4377	-0.0992917	0.105233	-0.204525	0.604223	0.735716	-0.278057	0.338492	0.277995	0.460685	-0.205336	0.773879	0.318779	0.635973	FALSE
TFAP2C p.M351I	3	7105	-0.327411	0.0184915	-0.345902	0.597743	0.79474	-0.435266	0.578681	0.43524	0.461626	-0.337737	0.155775	0.0232723	0.635973	FALSE
RXRA 3D hotspot 132-455-3dzu // RXRA 3D hotspot 132-455-3e00	15	7108	-0.126738	-0.00480923	-0.121929	0.671041	0.656272	-0.185782	0.181701	0.18579	0.461909	-0.124894	0.519224	0.193931	0.635973	FALSE
KLF5 missense	56	7097	-0.0661936	0.0176616	-0.0838552	0.894335	0.809207	-0.103538	0.0937626	0.103626	0.463121	-0.0797306	0.0448382	0.0644785	0.636367	FALSE
TP53 p.258	7	4377	-0.0973121	0.105233	-0.202546	0.586968	0.735716	-0.275373	0.345071	0.275304	0.463567	-0.203991	0.763643	0.333204	0.636367	FALSE
ESR1 interface NR2F1	10	7072	0.193459	0.0227464	0.170713	0.68549	0.745607	0.228981	0.249038	0.228958	0.464434	0.172577	0.414254	0.0545751	0.636616	FALSE
RELA interface JUN	6	7103	-0.200485	0.00594616	-0.206431	0.673251	0.709003	-0.291167	0.306618	0.291157	0.466038	-0.210984	0.274262	0.00149275	0.636693	FALSE
VDR interface RXRB // VDR interface RXRG	3	7122	-0.285663	0.0033594	-0.289023	0.722155	0.723939	-0.399236	0.400223	0.399236	0.466439	-0.304482	0.484902	0.016717	0.636693	FALSE
SPI1 missense	30	7126	-0.0903314	0.00604363	-0.0963751	0.860814	0.772058	-0.124767	0.111958	0.124829	0.466549	-0.102944	0.0110166	0.0569048	0.636693	FALSE
TFAP2C p.351	5	7105	-0.25166	0.0184915	-0.270152	0.837536	0.79474	-0.339914	0.322556	0.339925	0.467341	-0.258361	0.158572	0.021432	0.636838	FALSE
MEF2A hotspot S192	4	7111	0.259204	-0.00635796	0.265562	0.863842	0.835806	0.317727	0.30742	0.317732	0.468763	0.302741	0.736913	0.000108496	0.637001	FALSE
PBX1 p.361	3	7096	0.300867	0.00731086	0.293556	0.930056	0.660515	0.444374	0.315633	0.444435	0.468834	0.276129	0.00974134	0.00699805	0.637001	FALSE
TP53 p.G245C	11	4377	-0.0532964	0.105233	-0.15853	0.918203	0.735716	-0.21534	0.172652	0.215477	0.47082	-0.160369	0.785214	0.374678	0.63864	FALSE
SREBF1 MAPK1 phosphorylation loss	3	7093	0.304109	0.010322	0.293787	1.28785	0.702052	0.41833	0.228122	0.41847	0.472415	0.291474	0.808959	0.241064	0.63864	FALSE
TP63 interface TP73	4	6997	0.254006	0.0104275	0.243579	0.597765	0.678513	0.359007	0.407483	0.358989	0.472624	0.243732	0.79422	0.161175	0.63864	FALSE
SMAD4 p.356	3	6912	0.329516	0.0115843	0.317932	1.02848	0.747385	0.425337	0.309129	0.425392	0.472792	0.309531	0.000102991	0.0497035	0.63864	FALSE
CREB1 truncating	5	7138	-0.267838	0.013931	-0.281769	0.728396	0.860365	-0.327525	0.386835	0.327499	0.475953	-0.274255	0.0140202	0.143808	0.641974	FALSE
TP53 p.P152fs // TP53 p.P20fs	13	4377	-0.0378978	0.105233	-0.143131	0.79488	0.735716	-0.194502	0.180066	0.194547	0.477166	-0.145359	0.718169	0.302464	0.642347	FALSE
GATA3 p.H434fs	7	6972	0.231203	0.0233682	0.207835	0.734689	0.702129	0.295994	0.282888	0.296006	0.477614	0.188612	0.163149	0.0508721	0.642347	FALSE
EGR1 p.P332fs	5	7089	0.2523	0.0232116	0.229089	0.63418	0.843798	0.27153	0.361236	0.271497	0.480808	0.266117	0.00635248	0.177443	0.644175	FALSE
TP53 p.R280G	5	4377	-0.116669	0.105233	-0.221903	1.25724	0.735716	-0.301351	0.1765	0.301615	0.481523	-0.232137	0.791506	0.323083	0.644175	FALSE
TP53 AURKB phosphorylation loss	16	4377	-0.0252549	0.105233	-0.130488	0.791478	0.735716	-0.177315	0.164867	0.177363	0.481899	-0.129641	0.751787	0.25505	0.644175	FALSE
ESR1 interface NR1H4	13	7072	0.164604	0.0227464	0.141857	0.637374	0.745607	0.190301	0.222565	0.190258	0.48232	0.145415	0.408378	0.0552028	0.644175	FALSE
HSF1 missense	33	7120	0.0993136	0.0122887	0.0870249	0.524628	0.695998	0.125157	0.165879	0.125036	0.482444	0.0852659	0.572637	0.260439	0.644175	FALSE
TP53 p.135del	5	4377	-0.132955	0.105233	-0.238189	0.597407	0.735716	-0.323801	0.398704	0.323751	0.485917	-0.229535	0.778515	0.309337	0.646813	FALSE
RUNX1 p.205	3	7043	0.317394	-0.0106132	0.328007	0.178457	0.80282	0.408624	1.83802	0.408569	0.486338	0.322736	0.196854	0.907757	0.646813	FALSE
TP53 p.Y234C	17	4377	-0.0191594	0.105233	-0.124393	0.954038	0.735716	-0.168868	0.130386	0.169077	0.487494	-0.124304	0.741451	0.268942	0.646813	FALSE
TP53 p.G279E	4	4377	-0.15589	0.105233	-0.261123	0.895165	0.735716	-0.354866	0.291704	0.354924	0.488173	-0.255247	0.79613	0.308383	0.646813	FALSE
TP53 p.M237T	3	4377	-0.186669	0.105233	-0.291903	0.375299	0.735716	-0.396827	0.777787	0.39676	0.488923	-0.294116	0.780499	0.315999	0.646813	FALSE
SMAD4 p.Q334R	4	6912	0.23022	0.0115843	0.218636	1.11378	0.747385	0.292457	0.1963	0.292534	0.489929	0.257944	0.000110208	0.0540625	0.646813	FALSE
TP53 p.M237V	3	4377	-0.180879	0.105233	-0.286112	0.703078	0.735716	-0.388897	0.406943	0.38889	0.490811	-0.292923	0.797998	0.32565	0.646813	FALSE
RXRA 3D hotspot 128-456-4nqa	16	7108	-0.114066	-0.00480923	-0.109257	0.654992	0.656272	-0.166482	0.166807	0.166481	0.491792	-0.113009	0.518729	0.192688	0.646813	FALSE
FOXM1 p.L655fs // FOXM1 p.L670fs // FOXM1 p.L708fs	10	7088	-0.115801	0.0110713	-0.126872	0.39736	0.578136	-0.219524	0.319288	0.219451	0.491835	-0.125565	0.0262168	6.22472e-05	0.646813	FALSE
EGR1 inframe indel	3	7089	0.352792	0.0232116	0.329581	0.415736	0.843798	0.390634	0.792765	0.390592	0.492618	0.33424	0.00618839	0.173408	0.646813	FALSE
MAX interface MGA	10	7127	-0.174471	0.00446329	-0.178934	0.522238	0.773813	-0.231316	0.342629	0.231237	0.4929	-0.167734	0.298788	0.000346047	0.646813	FALSE
ELK4 truncating	7	7129	0.204386	-0.00427626	0.208663	0.597702	0.786621	0.265312	0.349108	0.265264	0.493276	0.203748	0.268748	0.0948187	0.646813	FALSE
SMAD4 p.43	3	6912	-0.30169	0.0115843	-0.313274	1.19178	0.747385	-0.419066	0.262863	0.41916	0.49348	-0.295297	0.000102397	0.0587059	0.646813	FALSE
TP53 p.R337H	3	4377	-0.194171	0.105233	-0.299404	0.129013	0.735716	-0.407046	2.32074	0.406956	0.495478	-0.289713	0.780168	0.322152	0.646957	FALSE
SMAD4 p.K507E	6	6912	0.204513	0.0115843	0.192929	0.797292	0.747385	0.258126	0.24198	0.258139	0.495524	0.207819	0.000112442	0.0486378	0.646957	FALSE
RARA hotspot S219	5	7116	0.234152	-0.00846123	0.242613	1.39471	0.781459	0.310271	0.173952	0.310462	0.495897	0.2383	0.436951	0.453615	0.646957	FALSE
KLF5 p.E419K	3	7097	0.317824	0.0176616	0.300162	0.825777	0.809207	0.370931	0.36349	0.370934	0.496379	0.31779	0.0486534	0.0577868	0.646957	FALSE
BATF hotspot S43	4	7144	-0.266936	0.00866648	-0.275603	1.16747	0.783472	-0.351681	0.236068	0.351771	0.498559	-0.265325	0.224739	0.118218	0.648131	FALSE
TP53 p.334	5	4377	0.324389	0.105233	0.219156	0.950171	0.735716	0.297791	0.230649	0.297881	0.498676	0.222895	0.753458	0.311555	0.648131	FALSE
ARNT interface ARNT // ARNT interface EPAS1	4	7096	-0.25707	0.0112526	-0.268322	0.466134	0.753662	-0.356071	0.575634	0.356025	0.500076	-0.254054	0.00277565	0.0510043	0.649041	FALSE
RXRA p.427	9	7108	-0.15042	-0.00480923	-0.14561	0.67031	0.656272	-0.22187	0.217229	0.221875	0.501519	-0.147255	0.519887	0.176055	0.650004	FALSE
CTCF p.N314fs	3	7006	-0.245268	0.0102334	-0.255502	0.448946	0.736315	-0.347031	0.569115	0.347	0.504381	-0.283747	0.637395	0.00144232	0.652803	FALSE
TP53 p.155	11	4377	0.260139	0.105233	0.154906	0.7209	0.735716	0.210561	0.214878	0.210551	0.507066	0.147459	0.859533	0.323458	0.655363	FALSE
TP53 p.G266R	9	4377	-0.0545585	0.105233	-0.159792	0.666959	0.735716	-0.217228	0.239583	0.217192	0.508539	-0.162316	0.822349	0.299644	0.656352	FALSE
TCF4 interface ID4	3	7063	-0.280983	0.0263794	-0.307362	1.01241	0.787235	-0.390396	0.303593	0.390432	0.510686	-0.29888	0.00113361	0.37762	0.657733	FALSE
TP53 p.H179N	3	4377	0.379399	0.105233	0.274165	0.670196	0.735716	0.372665	0.409082	0.372651	0.511026	0.279364	0.777881	0.315953	0.657733	FALSE
TP53 p.99del	8	4377	-0.0678423	0.105233	-0.173076	0.661176	0.735716	-0.235284	0.26177	0.235248	0.512715	-0.170449	0.773071	0.329591	0.657968	FALSE
STAT6 truncating	24	7073	-0.0982184	0.00794111	-0.10616	0.722866	0.790623	-0.134309	0.146859	0.134273	0.513204	-0.105522	0.0377519	5.15827e-06	0.657968	FALSE
TP53 p.276	4	4377	-0.126016	0.105233	-0.23125	0.970546	0.735716	-0.31424	0.238267	0.314319	0.514345	-0.240236	0.770399	0.345366	0.657968	FALSE
TP53 interface S100B // TP53 interface S100A6 // TP53 interface S100A1 // TP53 interface S100A4 // TP53 interface S100A2 // TP53 GSK3B phosphorylation loss // TP53 hotspot S371 // TP53 hotspot S376 // TP53 hotspot S378 // TP53 hotspot T377 // TP53 p.376	3	4377	0.387355	0.105233	0.282122	0.262489	0.735716	0.383542	1.0748	0.383466	0.51568	0.276239	0.78026	0.321388	0.657968	FALSE
TP53 p.V143M	3	4377	0.384087	0.105233	0.278853	0.609193	0.735716	0.37905	0.457742	0.379023	0.515693	0.27627	0.801445	0.333709	0.657968	FALSE
RUNX2 truncating	20	7074	-0.0958067	0.00588739	-0.101694	0.757314	0.71648	-0.141913	0.134283	0.141936	0.515818	-0.104173	0.000163815	0.11083	0.657968	FALSE
E2F7 p.P729fs	5	7053	0.170971	0.0124744	0.158496	0.773728	0.626168	0.253083	0.204847	0.253121	0.517355	0.181312	0.0316955	0.00327943	0.657968	FALSE
CDC5L p.264	4	7067	0.287215	0.0109805	0.276235	0.460827	0.927196	0.297973	0.599434	0.297925	0.518105	0.299175	1.20975e-05	0.00527582	0.657968	FALSE
TP53 p.G266E	7	4377	0.283486	0.105233	0.178253	0.705004	0.735716	0.242299	0.252839	0.242285	0.519376	0.179335	0.798889	0.323194	0.657968	FALSE
POU5F1 truncating	4	7136	-0.19468	0.00059981	-0.19528	0.58331	0.647688	-0.301515	0.334779	0.301503	0.519727	-0.208558	0.216724	0.129639	0.657968	FALSE
TCF3 interface TCF21 // TCF3 interface LYL1 // TCF3 interface MYF5 // TCF3 interface MYOD1 // TCF3 interface TCF4 // TCF3 interface TCF3 // TCF3 interface TAL1 // TCF3 interface ASCL1 // TCF3 interface HAND2 // TCF3 interface NHLH1 // TCF3 interface TWIST1 // TCF3 interface TCF12	4	7120	-0.275772	0.0163394	-0.292111	0.875839	0.846207	-0.345195	0.333521	0.345201	0.520414	-0.271945	0.00944634	0.234331	0.657968	FALSE
TP53 p.P27fs	4	4377	-0.11543	0.105233	-0.220664	0.347751	0.735716	-0.30001	0.634545	0.299931	0.522632	-0.235515	0.787777	0.322409	0.657968	FALSE
TP53 p.V216M	13	4377	-0.0303505	0.105233	-0.135584	0.962168	0.735716	-0.18411	0.140915	0.184289	0.523301	-0.13063	0.791124	0.330623	0.657968	FALSE
TP53 p.P278S	9	4377	-0.0468634	0.105233	-0.152097	0.713333	0.735716	-0.206744	0.21322	0.206733	0.523727	-0.156574	0.779037	0.321469	0.657968	FALSE
KLF5 truncating	9	7097	0.177692	0.0176616	0.16003	0.680584	0.809207	0.197794	0.235136	0.197762	0.524987	0.171553	0.0483896	0.0523375	0.657968	FALSE
RUNX2 p.P424fs // RUNX2 p.P438fs // RUNX2 p.P446fs // RUNX2 p.P460fs	3	7074	-0.267255	0.00588739	-0.273143	0.538694	0.71648	-0.381252	0.507046	0.381229	0.525032	-0.262727	0.00018328	0.113359	0.657968	FALSE
MITF p.317 // MITF p.430	5	7095	-0.152122	0.00920353	-0.161325	0.375184	0.611859	-0.263711	0.429991	0.263664	0.525851	-0.173505	0.0277628	0.00340895	0.657968	FALSE
STAT2 interface CREBBP	4	7080	-0.26759	0.00670675	-0.274297	0.623112	0.830492	-0.330313	0.440205	0.330282	0.526075	-0.26321	0.094322	0.00629121	0.657968	FALSE
ETS1 hotspot S251	3	7111	0.327286	0.00243989	0.324846	0.835099	0.804197	0.403934	0.388991	0.403938	0.526462	0.294131	0.672605	0.00442437	0.657968	FALSE
STAT6 interface STAT3	3	7073	-0.258622	0.00794111	-0.266563	1.34922	0.790623	-0.337065	0.197568	0.337156	0.52676	-0.288619	0.0374999	6.50389e-06	0.657968	FALSE
TP53 p.P72fs	7	4377	-0.0669818	0.105233	-0.172215	1.00422	0.735716	-0.23394	0.171492	0.234079	0.527254	-0.176133	0.793019	0.346069	0.657968	FALSE
TP53 hotspot S313 // TP53 hotspot S314 // TP53 hotspot S315	9	4377	0.25823	0.105233	0.152997	0.701473	0.735716	0.207973	0.218108	0.207956	0.527282	0.155248	0.768477	0.322955	0.657968	FALSE
SMAD4 p.504	5	6912	0.186702	0.0115843	0.175118	0.876731	0.747385	0.234282	0.19974	0.234308	0.527863	0.210911	0.000106623	0.0606664	0.657968	FALSE
POU2F1 PRKDC phosphorylation loss	4	7096	0.21568	-0.0020886	0.217769	0.64668	0.668325	0.325847	0.336749	0.325842	0.528225	0.210783	0.00918404	0.535779	0.657968	FALSE
HNF1A missense	37	7095	0.0560492	-0.000901775	0.056951	0.440146	0.506109	0.112596	0.129391	0.112527	0.529678	0.052399	0.0152318	0.255454	0.658893	FALSE
FOXO3 interface FOXM1	3	7129	0.324562	0.0116803	0.312882	0.643844	0.855333	0.365824	0.485959	0.365801	0.531445	0.309251	0.9893	0.718021	0.659788	FALSE
TP53 p.P64fs	3	4377	0.371955	0.105233	0.266722	0.936518	0.735716	0.362483	0.284802	0.362534	0.531826	0.265893	0.788415	0.306176	0.659788	FALSE
TP53 p.106	6	4377	-0.0750013	0.105233	-0.180235	1.03747	0.735716	-0.244841	0.173725	0.244979	0.532748	-0.187705	0.740885	0.305499	0.659788	FALSE
MAX missense	30	7127	0.0854314	0.00446329	0.0809681	0.760935	0.773813	0.104642	0.106406	0.104635	0.533241	0.0881609	0.276497	0.000290003	0.659788	FALSE
TP53 p.P278L	4	4377	-0.121649	0.105233	-0.226883	0.223825	0.735716	-0.30848	1.01366	0.308384	0.535071	-0.228261	0.785354	0.3288	0.661171	FALSE
TP53 p.A161T	6	4377	-0.0760227	0.105233	-0.181256	0.527694	0.735716	-0.246435	0.343487	0.246367	0.537773	-0.185205	0.785352	0.314959	0.66326	FALSE
TCF3 missense	31	7120	-0.0810525	0.0163394	-0.0973919	0.99845	0.846207	-0.114998	0.0975431	0.115092	0.538267	-0.0938045	0.0113272	0.261613	0.66326	FALSE
USF2 hotspot T230	4	7138	-0.176535	0.0112407	-0.187775	0.874314	0.637719	-0.294394	0.214769	0.294448	0.538906	-0.195936	0.00122148	0.78428	0.66326	FALSE
TP53 p.C238F	11	4377	-0.033367	0.105233	-0.1386	0.768206	0.735716	-0.188369	0.180421	0.188389	0.539735	-0.136246	0.816869	0.321648	0.663401	FALSE
TP53 p.L265R	3	4377	-0.148834	0.105233	-0.254068	0.194812	0.735716	-0.345407	1.30417	0.345334	0.540832	-0.25989	0.782296	0.326492	0.663576	FALSE
FOSL2 missense	42	7106	0.0614601	-0.00251162	0.0639717	0.786267	0.685512	0.0932353	0.0813614	0.0933197	0.541613	0.0647981	0.0352853	0.152305	0.663576	FALSE
TP53 p.215	11	4377	-0.0349061	0.105233	-0.14014	0.924495	0.735716	-0.190355	0.151585	0.190481	0.542023	-0.135569	0.759026	0.266811	0.663576	FALSE
TP53 p.S241C	6	4377	-0.0790025	0.105233	-0.184236	0.838345	0.735716	-0.250375	0.219761	0.250417	0.543348	-0.182804	0.805648	0.351754	0.664322	FALSE
SMAD4 interface SKIL	20	6912	0.0876733	0.0115843	0.076089	0.909415	0.747385	0.10174	0.0836681	0.101807	0.546602	0.100904	9.17289e-05	0.0474568	0.667421	FALSE
ZNF423 p.89	3	6936	-0.248893	-0.00236767	-0.246525	0.954058	0.653417	-0.377224	0.258396	0.377286	0.547372	-0.227121	0.0626444	0.282192	0.667483	FALSE
SREBF2 p.H763fs	3	7058	-0.194462	-0.000480323	-0.193981	1.34864	0.555699	-0.348835	0.143835	0.349076	0.549301	-0.192336	0.612557	0.907822	0.66835	FALSE
JUN p.112	3	7136	0.256075	0.0100923	0.245982	1.06494	0.717228	0.342905	0.230982	0.342963	0.550763	0.247115	0.3206	0.0155401	0.66835	FALSE
MYC p.S161L // MYC p.161	6	7143	0.172066	0.00807158	0.163994	0.727103	0.734874	0.223161	0.225545	0.22316	0.550835	0.178993	0.0540637	0.00448695	0.66835	FALSE
HNF1A p.A225fs	11	7095	-0.0856622	-0.000901775	-0.0847605	0.564431	0.506109	-0.167446	0.15017	0.167475	0.551417	-0.0910097	0.0139713	0.259003	0.66835	FALSE
RXRA 3D hotspot 226-458-1xdk	14	7108	0.102719	-0.00480923	0.107528	0.762608	0.656272	0.163795	0.141001	0.163847	0.551684	0.104644	0.529502	0.172511	0.66835	FALSE
ARNTL hotspot S90	5	7117	-0.21421	-0.00770235	-0.206507	1.14258	0.770354	-0.267978	0.180737	0.268068	0.553422	-0.204363	0.265383	0.787858	0.668952	FALSE
PLAG1 p.P386S	3	7089	-0.275718	0.0138648	-0.289583	0.40135	0.796174	-0.363757	0.721522	0.363718	0.553623	-0.272227	0.0107582	0.0656033	0.668952	FALSE
CEBPA inframe indel	8	7121	-0.145768	0.00504518	-0.150813	0.244731	0.687317	-0.219518	0.616242	0.219424	0.555899	-0.143356	0.671222	0.383365	0.67005	FALSE
BATF p.R37C // BATF p.37	3	7144	-0.273355	0.00866648	-0.282022	1.42977	0.783472	-0.359846	0.197249	0.359964	0.555976	-0.266533	0.224894	0.118244	0.67005	FALSE
STAT3 missense	79	7070	0.050476	0.00858331	0.0418927	0.769029	0.722323	0.057955	0.0544747	0.0579972	0.558411	0.0478803	0.440762	0.0230304	0.670604	FALSE
CLOCK truncating	40	7079	0.0630161	-0.00896118	0.0719773	0.596488	0.731236	0.0985228	0.120668	0.0984324	0.55897	0.0677082	0.103506	0.516933	0.670604	FALSE
USF1 p.145	3	7124	0.250865	0.00332454	0.247541	0.487417	0.716511	0.345507	0.507862	0.345481	0.559104	0.241414	5.38598e-06	0.26024	0.670604	FALSE
TP53 p.G244C	6	4377	-0.0693913	0.105233	-0.174625	0.929444	0.735716	-0.237273	0.187881	0.237354	0.559858	-0.175334	0.782151	0.311259	0.670604	FALSE
SPI1 p.P15fs	3	7126	0.300593	0.00604363	0.294549	0.100621	0.772058	0.381564	2.92731	0.381512	0.560049	0.259768	0.012853	0.0815075	0.670604	FALSE
POU2F1 interface HOXB13	4	7096	0.194557	-0.0020886	0.196645	0.595699	0.668325	0.294249	0.330109	0.294236	0.562379	0.193574	0.0100678	0.528925	0.672527	FALSE
CEBPA missense	24	7121	0.0834672	0.00504518	0.078422	0.650516	0.687317	0.114118	0.120554	0.114099	0.565047	0.0808888	0.624007	0.358352	0.674847	FALSE
LEF1 p.G249S // LEF1 p.249	3	7102	-0.24241	0.0152461	-0.257656	1.27588	0.786613	-0.327476	0.201944	0.327551	0.568047	-0.259333	0.414081	0.00534534	0.676925	FALSE
SMAD4 p.494	5	6912	-0.182906	0.0115843	-0.19449	0.559683	0.747385	-0.26026	0.3475	0.260227	0.569577	-0.189924	0.00010559	0.0550754	0.676925	FALSE
EGR1 interface SNAI1	3	7089	-0.268492	0.0232116	-0.291703	0.76365	0.843798	-0.345712	0.381986	0.345703	0.570373	-0.276417	0.00588852	0.178731	0.676925	FALSE
RREB1 truncating	15	7011	-0.128238	-0.00625802	-0.12198	0.870637	0.718286	-0.169742	0.140105	0.169822	0.570539	-0.105275	2.12588e-05	0.685405	0.676925	FALSE
RXRA 3D hotspot 132-455-3dzy	14	7108	-0.101361	-0.00480923	-0.0965513	0.688862	0.656272	-0.147107	0.140161	0.147121	0.57205	-0.0993036	0.527409	0.191645	0.676925	FALSE
ESR2 interface NCOA1	4	7099	0.228678	0.0103117	0.218367	0.460354	0.856089	0.255113	0.474345	0.255075	0.572454	0.241487	0.0158321	0.00397015	0.676925	FALSE
EGR1 interface SP1	4	7089	-0.210759	0.0232116	-0.233971	0.634118	0.843798	-0.277308	0.36897	0.277283	0.57253	-0.238031	0.00579855	0.178398	0.676925	FALSE
TP53 p.I232T	3	4377	-0.139199	0.105233	-0.244432	0.807379	0.735716	-0.332222	0.302748	0.332237	0.572622	-0.239811	0.752168	0.321209	0.676925	FALSE
SMAD4 p.R441C	4	6912	-0.23233	0.0115843	-0.243914	0.390821	0.747385	-0.326408	0.624107	0.326356	0.574131	-0.20983	0.00011013	0.0564146	0.677689	FALSE
HNF4A interface NCOA1	3	7067	0.149913	0.00625093	0.143662	0.52506	0.452004	0.317817	0.273611	0.317833	0.574729	0.146554	0.354189	0.671902	0.677689	FALSE
NFE2L2 p.D29N	5	6974	0.190955	0.0107031	0.180252	0.590184	0.745359	0.241858	0.305416	0.241832	0.576051	0.186376	0.00808895	0.537648	0.677689	FALSE
TP53 p.H193P	7	4377	-0.0578519	0.105233	-0.163085	0.666303	0.735716	-0.221696	0.244762	0.221669	0.57619	-0.155625	0.812114	0.332576	0.677689	FALSE
STAT3 interface RET	3	7070	0.230606	0.00858331	0.222023	0.864817	0.722323	0.307354	0.256728	0.307373	0.578536	0.23169	0.477934	0.0187252	0.679588	FALSE
GATA6 inframe indel // GATA6 p.324del	4	7116	0.212628	0.0075947	0.205033	1.06784	0.723583	0.283288	0.192008	0.283358	0.581255	0.199679	0.605949	0.165053	0.681919	FALSE
FOXM1 p.S643P // FOXM1 p.643	3	7088	-0.186919	0.0110713	-0.19799	0.853632	0.578136	-0.342406	0.231938	0.342463	0.583809	-0.182748	0.0236332	5.07896e-05	0.68405	FALSE
FLI1 p.429	3	7090	0.255148	0.000189083	0.254959	0.850537	0.764628	0.33343	0.299762	0.333442	0.585277	0.240945	0.117789	0.115065	0.684207	FALSE
NFE2L2 p.D29G	3	6974	0.22088	0.0107031	0.210177	0.437791	0.745359	0.282008	0.480086	0.281981	0.586263	0.234208	0.00811239	0.527376	0.684207	FALSE
TP53 p.R158G	3	4377	-0.126545	0.105233	-0.231778	1.37432	0.735716	-0.314859	0.16865	0.315038	0.587789	-0.230531	0.800386	0.322919	0.684207	FALSE
FOSL2 interface JUN // FOSL2 interface ATF2 // FOSL2 interface JUND // FOSL2 interface ATF7 // FOSL2 interface MAFB	3	7106	0.215961	-0.00251162	0.218473	0.0510374	0.685512	0.318745	4.28064	0.318701	0.588885	0.213862	0.0318513	0.186396	0.684207	FALSE
USF2 hotspot S155	5	7138	0.173979	0.0112407	0.162738	0.702676	0.637719	0.255173	0.231598	0.255188	0.588979	0.154108	0.00139115	0.789905	0.684207	FALSE
ELK4 missense	27	7129	-0.089951	-0.00427626	-0.0856748	0.636589	0.786621	-0.108983	0.134584	0.108915	0.589053	-0.0818801	0.22447	0.0877053	0.684207	FALSE
SMAD4 p.100	4	6912	-0.224892	0.0115843	-0.236476	1.00701	0.747385	-0.316348	0.23483	0.316404	0.589104	-0.201748	9.28157e-05	0.0589735	0.684207	FALSE
TP53 p.144	3	4377	0.332413	0.105233	0.22718	0.0648182	0.735716	0.308857	3.50488	0.308787	0.593217	0.227055	0.779756	0.321039	0.687002	FALSE
ATF4 missense	40	7102	0.0616	-0.0191349	0.0807349	0.843872	0.82778	0.0975213	0.0956719	0.0975318	0.593501	0.0700479	0.0520732	0.0104644	0.687002	FALSE
TP53 p.R196P	3	4377	-0.12415	0.105233	-0.229383	0.271152	0.735716	-0.311844	0.845959	0.311782	0.593732	-0.226666	0.781828	0.316551	0.687002	FALSE
GATA4 missense	31	7126	-0.0571611	0.0357741	-0.0929353	0.903861	0.876926	-0.105965	0.10282	0.105978	0.597745	-0.0832969	0.0111734	0.717272	0.689935	FALSE
STAT3 interface STAT3	3	7070	-0.219562	0.00858331	-0.228145	0.45533	0.722323	-0.315876	0.501055	0.315849	0.597753	-0.220019	0.470674	0.0180857	0.689935	FALSE
PLAG1 p.431	3	7089	0.253661	0.0138648	0.239796	0.819003	0.796174	0.301183	0.29279	0.301185	0.599547	0.241358	0.0111775	0.065538	0.690686	FALSE
RUNX1 p.D110fs // RUNX1 p.D111fs // RUNX1 p.D123fs // RUNX1 p.D96fs // RUNX1 p.G25fs	8	7043	-0.155255	-0.0106132	-0.144641	1.07399	0.80282	-0.180096	0.134677	0.180167	0.599893	-0.149095	0.201276	0.905722	0.690686	FALSE
SMAD4 p.334	6	6912	-0.18969	0.0115843	-0.201274	1.08228	0.747385	-0.269198	0.185972	0.269305	0.602187	-0.159067	0.000100502	0.0573612	0.691287	FALSE
RXRA interface NR1H2	15	7108	-0.0895358	-0.00480923	-0.0847266	0.67033	0.656272	-0.129097	0.126395	0.129103	0.602961	-0.0883232	0.527259	0.190504	0.691287	FALSE
TP63 missense	143	6997	0.0382341	0.0104275	0.0278066	0.670599	0.678513	0.0409911	0.0414653	0.0409817	0.603313	0.029797	0.828872	0.133482	0.691287	FALSE
HNF4A inframe indel // HNF4A p.315del // HNF4A p.337del	4	7067	0.127159	0.00625093	0.120908	1.01734	0.452004	0.267262	0.118847	0.267493	0.604203	0.117313	0.313606	0.671874	0.691287	FALSE
TP53 p.V272G	3	4377	-0.104315	0.105233	-0.209548	0.491683	0.735716	-0.284858	0.426186	0.284822	0.604397	-0.220242	0.774837	0.322004	0.691287	FALSE
RXRA interface RARG	13	7108	0.0910773	-0.00480923	0.0958865	0.792452	0.656272	0.146051	0.121	0.146108	0.604884	0.0943736	0.531564	0.173562	0.691287	FALSE
SMAD3 interface WWP2 // SMAD3 interface WWP1 // SMAD3 interface SMURF2 // SMAD3 interface SMURF1	4	7093	0.221696	0.0178004	0.203896	0.513796	0.833442	0.244675	0.396842	0.244643	0.606542	0.214248	0.000123392	0.000121239	0.69233	FALSE
PAX5 truncating	5	7103	-0.161052	0.0178502	-0.178902	1.01341	0.825094	-0.216795	0.176534	0.216826	0.607491	-0.189596	0.060824	0.0835814	0.69256	FALSE
TP53 p.205	26	4377	0.0327274	0.105233	-0.072506	0.628316	0.735716	-0.0986275	0.115397	0.0985517	0.6084	-0.0741208	0.861429	0.396302	0.692746	FALSE
NFKB1 hotspot S328	4	7096	0.217771	0.00912631	0.208644	0.985048	0.753031	0.277031	0.211811	0.277073	0.610149	0.191976	0.433334	0.00157643	0.693885	FALSE
TP53 p.R156P	3	4377	0.332329	0.105233	0.227096	0.627725	0.735716	0.308693	0.361776	0.308673	0.611578	0.215889	0.781941	0.32229	0.69391	FALSE
STAT1 truncating	10	7068	0.125564	0.0134036	0.112161	1.19047	0.798822	0.140298	0.0942156	0.140407	0.612048	0.128243	0.894815	0.00023499	0.69391	FALSE
NFE2L2 p.26	6	6974	0.155289	0.0107031	0.144586	0.871731	0.745359	0.193956	0.165861	0.193982	0.612414	0.154232	0.00786961	0.524566	0.69391	FALSE
TP53 p.S127Y	4	4377	-0.0733965	0.105233	-0.17863	0.483836	0.735716	-0.242845	0.369195	0.242797	0.614184	-0.185555	0.795298	0.314117	0.695067	FALSE
TP53 p.R335fs	3	4377	-0.1009	0.105233	-0.206133	0.559067	0.735716	-0.280207	0.368709	0.28018	0.617439	-0.212292	0.791368	0.311291	0.6979	FALSE
SPI1 p.67	3	7126	-0.222933	0.00604363	-0.228976	0.931054	0.772058	-0.29656	0.245932	0.296579	0.619006	-0.22162	0.0124602	0.0760487	0.698335	FALSE
SMAD4 p.537	6	6912	-0.15147	0.0115843	-0.163054	1.0883	0.747385	-0.218078	0.149825	0.218166	0.619378	-0.151519	0.000146063	0.0545058	0.698335	FALSE
STAT3 interface STAT6 // STAT3 interface ABL2 // STAT3 interface SYK // STAT3 p.616	3	7070	0.239084	0.00858331	0.2305	0.693736	0.722323	0.319114	0.332259	0.31911	0.620082	0.206782	0.450926	0.017804	0.698335	FALSE
HNF1A p.G171fs // HNF1A p.G288fs	16	7095	-0.0561901	-0.000901775	-0.0552883	0.491035	0.506109	-0.109249	0.112595	0.109242	0.624448	-0.0620216	0.0138812	0.249047	0.6985	FALSE
PPARG interface NR0B1	4	7105	-0.173201	0.0141343	-0.187335	0.630794	0.750058	-0.249776	0.296983	0.24976	0.624732	-0.183506	0.41549	0.219968	0.6985	FALSE
TP63 p.643	4	6997	0.175948	0.0104275	0.16552	0.853	0.678513	0.243915	0.194045	0.243946	0.625466	0.165673	0.788262	0.153376	0.6985	FALSE
TCF3 truncating	8	7120	0.161644	0.0163394	0.145305	0.736541	0.846207	0.171734	0.19728	0.171713	0.627016	0.145391	0.0104655	0.217875	0.6985	FALSE
TP53 p.M246I	4	4377	0.277881	0.105233	0.172648	0.48761	0.735716	0.234711	0.35407	0.234666	0.627303	0.178717	0.786888	0.328095	0.6985	FALSE
GATA3 p.128	3	6972	-0.177543	0.0233682	-0.200911	0.416356	0.702129	-0.286172	0.482546	0.286146	0.627397	-0.196751	0.164958	0.0515932	0.6985	FALSE
BACH1 p.R694Q // BACH1 p.694	3	7077	0.232943	0.0227975	0.210145	0.337125	0.755907	0.278036	0.623346	0.278004	0.627663	0.211673	0.03756	0.865766	0.6985	FALSE
HLF missense	37	7120	-0.0449332	0.0168518	-0.061785	0.89648	0.79083	-0.0780708	0.0689195	0.0781267	0.627954	-0.063203	0.0322529	0.493616	0.6985	FALSE
TP53 p.218	4	4377	0.287973	0.105233	0.18274	0.374679	0.735716	0.248447	0.487724	0.248384	0.629543	0.177545	0.791531	0.317785	0.6985	FALSE
MAZ missense	22	7119	0.109186	0.0254748	0.0837111	0.720416	0.852437	0.0982434	0.116198	0.0982021	0.629839	0.0877753	0.582879	0.879778	0.6985	FALSE
TP53 p.R110L	9	4377	-0.012905	0.105233	-0.118138	0.693728	0.735716	-0.160592	0.170295	0.160576	0.630923	-0.117953	0.814563	0.307639	0.6985	FALSE
EGR1 missense	48	7089	0.0695619	0.0232116	0.0463503	0.902448	0.843798	0.0549046	0.0513606	0.0549306	0.631447	0.0586531	0.00623592	0.214824	0.6985	FALSE
RUNX1 truncating	37	7043	0.0561044	-0.0106132	0.0667176	0.929537	0.80282	0.0830322	0.071775	0.0831041	0.632546	0.0633987	0.185407	0.948344	0.6985	FALSE
SMAD4 p.533	3	6912	-0.214199	0.0115843	-0.225783	0.0717857	0.747385	-0.302141	3.14524	0.302098	0.633292	-0.205664	0.000110413	0.0537301	0.6985	FALSE
FOXA1 p.226	7	7067	0.156788	0.0285778	0.12821	0.55182	0.748536	0.171314	0.23234	0.171281	0.633428	0.134936	0.0095276	0.190198	0.6985	FALSE
ARNTL p.E303K // ARNTL p.303	3	7117	-0.212868	-0.00770235	-0.205166	0.316818	0.770354	-0.266358	0.647583	0.266327	0.633616	-0.212057	0.274933	0.806151	0.6985	FALSE
TP53 p.R175C	4	4377	0.281003	0.105233	0.175769	0.239567	0.735716	0.238983	0.733696	0.238909	0.634979	0.174693	0.786809	0.314771	0.6985	FALSE
SRF interface SRF	3	7133	0.244682	0.00908796	0.235594	0.729665	0.768242	0.30667	0.322879	0.306666	0.635367	0.210392	0.643747	0.0143559	0.6985	FALSE
BACH1 truncating	17	7077	-0.0678852	0.0227975	-0.0906828	0.652091	0.755907	-0.12	0.139065	0.119966	0.63627	-0.0867968	0.0368527	0.903147	0.6985	FALSE
TP53 p.V272M	16	4377	0.0135136	0.105233	-0.0917198	0.900477	0.735716	-0.124562	0.101857	0.124667	0.637074	-0.0870562	0.744599	0.314352	0.6985	FALSE
NFKB1 interface RELA	4	7096	0.196112	0.00912631	0.186985	0.618609	0.753031	0.248327	0.302267	0.24831	0.637495	0.177381	0.44624	0.00190163	0.6985	FALSE
RXRA truncating	7	7108	-0.113374	-0.00480923	-0.108565	1.09481	0.656272	-0.165302	0.0991633	0.165426	0.639146	-0.116508	0.504059	0.22537	0.6985	FALSE
ESR1 interface NCOA3	3	7072	0.224192	0.0227464	0.201446	0.931093	0.745607	0.270156	0.216354	0.270177	0.639173	0.201896	0.425492	0.0665186	0.6985	FALSE
CLOCK p.L123fs	7	7079	-0.128731	-0.00896118	-0.119769	0.60057	0.731236	-0.163813	0.199426	0.16379	0.639891	-0.129382	0.0951099	0.449128	0.6985	FALSE
PPARD interface RXRB // PPARD interface RXRG	14	7115	0.0988494	-0.00332431	0.102174	0.595773	0.68935	0.148252	0.171498	0.148218	0.641085	0.0858781	0.068187	3.3913e-05	0.6985	FALSE
VDR p.R158C // VDR p.158	3	7122	-0.171717	0.0033594	-0.175076	0.816648	0.723939	-0.241829	0.214384	0.241838	0.641093	-0.194878	0.44981	0.0168279	0.6985	FALSE
TP53 p.C136fs // TP53 p.C229fs // TP53 p.C97fs	7	4377	-0.0242399	0.105233	-0.129473	0.508211	0.735716	-0.176046	0.254763	0.175983	0.641178	-0.129726	0.793541	0.325447	0.6985	FALSE
CDC5L p.E217fs	3	7067	-0.235427	0.0109805	-0.246408	0.437053	0.927196	-0.265785	0.563793	0.265756	0.641304	-0.249078	1.18362e-05	0.0049738	0.6985	FALSE
RXRA 3D hotspot 227-458-1fm9 // RXRA 3D hotspot 227-458-1k74 // RXRA 3D hotspot 228-456-1rdt	13	7108	-0.0868278	-0.00480923	-0.0820185	0.714753	0.656272	-0.124957	0.114751	0.124976	0.645258	-0.0839606	0.527984	0.190226	0.701785	FALSE
GABPA p.Q97R // GABPA p.97	3	7115	0.186196	0.000316052	0.18588	0.454143	0.784117	0.237078	0.409298	0.237056	0.645832	0.208099	0.393198	0.0537449	0.701785	FALSE
NFE2L2 p.77	3	6974	0.225266	0.0107031	0.214563	0.607174	0.745359	0.287879	0.35338	0.287865	0.648131	0.196375	0.00807736	0.547064	0.702683	FALSE
LEF1 truncating	4	7102	0.207401	0.0152461	0.192155	0.622747	0.786613	0.244301	0.30856	0.244282	0.648173	0.179438	0.422912	0.00531116	0.702683	FALSE
RUNX1 CDK1 phosphorylation loss // RUNX1 CDK2 phosphorylation loss // RUNX1 MAPK1 phosphorylation loss // RUNX1 CDK6 phosphorylation loss // RUNX1 p.R293Q // RUNX1 p.293	5	7043	0.149766	-0.0106132	0.160379	0.974956	0.80282	0.199743	0.164499	0.19977	0.649895	0.163065	0.210399	0.89814	0.703728	FALSE
ESR2 missense	58	7099	0.044408	0.0103117	0.0340962	0.852249	0.856089	0.0398293	0.0400073	0.0398279	0.652758	0.0507791	0.0124161	0.00628256	0.705354	FALSE
GLI2 p.63	7	6958	0.114292	0.00379928	0.110493	0.751966	0.750861	0.147154	0.146938	0.147154	0.653236	0.127527	0.00113481	0.879182	0.705354	FALSE
TP53 p.L130F	4	4377	-0.0614639	0.105233	-0.166697	0.46003	0.735716	-0.226626	0.362362	0.226578	0.655903	-0.164021	0.745153	0.313041	0.705354	FALSE
MAZ p.D94fs	3	7119	-0.196816	0.0254748	-0.222291	0.299507	0.852437	-0.260803	0.742188	0.260771	0.657452	-0.218326	0.581327	0.908298	0.705354	FALSE
TP53 p.S128fs // TP53 p.S260fs	4	4377	0.261796	0.105233	0.156562	0.281523	0.735716	0.212865	0.556125	0.212803	0.659302	0.162256	0.778932	0.322618	0.705354	FALSE
TP53 p.R280T	9	4377	-0.00218339	0.105233	-0.107417	0.680143	0.735716	-0.146023	0.157933	0.146003	0.659366	-0.108227	0.768721	0.344096	0.705354	FALSE
TP53 p.R267W	3	4377	0.289188	0.105233	0.183955	0.539381	0.735716	0.250061	0.341048	0.250035	0.659408	0.187293	0.798907	0.334727	0.705354	FALSE
KLF5 hotspot S303	7	7097	0.150677	0.0176616	0.133016	1.19647	0.809207	0.164296	0.111174	0.164378	0.659804	0.134727	0.0453104	0.0583126	0.705354	FALSE
SMAD4 missense	208	6912	-0.0258728	0.0115843	-0.037457	0.875897	0.747385	-0.0498475	0.0427642	0.0501174	0.660393	-0.023255	0.000116748	0.0502496	0.705354	FALSE
GATA3 p.F234fs	4	6972	0.172185	0.0233682	0.148816	0.852051	0.702129	0.211929	0.174657	0.21195	0.66107	0.154011	0.170843	0.0532661	0.705354	FALSE
TP53 p.Q136E	6	4377	0.235012	0.105233	0.129778	0.327068	0.735716	0.176478	0.396792	0.176397	0.662116	0.131332	0.774932	0.318784	0.705354	FALSE
SMAD3 hotspot S416	7	7093	0.15926	0.0178004	0.141459	0.846129	0.833442	0.169727	0.167184	0.169729	0.662121	0.13746	0.000136648	0.000158092	0.705354	FALSE
EZH2 p.E740K // EZH2 p.740	3	7038	0.217979	-0.000757567	0.218737	0.897236	0.81527	0.268292	0.243789	0.2683	0.662245	0.205701	0.151568	0.788924	0.705354	FALSE
RUNX1 p.I150T	4	7043	0.175771	-0.0106132	0.186384	1.14833	0.80282	0.23211	0.162308	0.232162	0.663075	0.175026	0.199824	0.913619	0.705354	FALSE
GATA3 p.H435fs	5	6972	0.176007	0.0233682	0.152639	0.882192	0.702129	0.217358	0.173022	0.217394	0.665083	0.136018	0.165207	0.0508738	0.705354	FALSE
CTCF p.552	3	7006	0.185623	0.0102334	0.17539	0.457535	0.736315	0.23822	0.383337	0.2382	0.665231	0.18388	0.654966	0.00148707	0.705354	FALSE
POU3F2 interface PAX3	3	7121	0.157395	0.0103698	0.147026	0.329536	0.779478	0.188643	0.446159	0.188621	0.665901	0.194345	0.000643813	0.971454	0.705354	FALSE
MEF2A interface MEF2A	4	7111	-0.184269	-0.00635796	-0.177911	0.286163	0.835806	-0.212901	0.62171	0.212861	0.66848	-0.178849	0.735679	0.000110738	0.705354	FALSE
ERG interface ERG	4	7087	0.182717	0.00340932	0.179307	0.711025	0.83359	0.215115	0.252182	0.215103	0.668507	0.178544	0.812647	0.324178	0.705354	FALSE
MAZ truncating	20	7119	-0.0598559	0.0254748	-0.0853307	0.605328	0.852437	-0.100168	0.140966	0.100102	0.669142	-0.0815949	0.565314	0.908533	0.705354	FALSE
TP63 interface TP53	30	6997	0.0612001	0.0104275	0.0507726	0.673246	0.678513	0.0748316	0.0754145	0.0748292	0.669938	0.0529178	0.864109	0.139209	0.705354	FALSE
ARNTL truncating	8	7117	0.108088	-0.00770235	0.11579	0.721312	0.770354	0.150317	0.160527	0.150308	0.669968	0.116168	0.302448	0.787878	0.705354	FALSE
TP53 p.R333fs	3	4377	-0.0858303	0.105233	-0.191064	0.523805	0.735716	-0.259727	0.364761	0.259698	0.670684	-0.180743	0.789646	0.322544	0.705354	FALSE
FOXA1 p.I176M	4	7067	0.19127	0.0285778	0.162692	0.896492	0.748536	0.217327	0.181477	0.217347	0.670733	0.159156	0.00944585	0.206009	0.705354	FALSE
REL truncating	6	7107	0.157785	-0.00303758	0.160823	0.485038	0.817736	0.196713	0.331568	0.196669	0.672026	0.141358	0.165437	0.00823195	0.705354	FALSE
TP53 p.127	13	4377	0.0214015	0.105233	-0.0838319	0.39007	0.735716	-0.114058	0.214915	0.113946	0.672089	-0.0864448	0.7991	0.316635	0.705354	FALSE
SMAD3 interface ZFYVE9	7	7093	0.154818	0.0178004	0.137017	0.588064	0.833442	0.164434	0.232997	0.164399	0.672586	0.13295	0.000118937	0.000113311	0.705354	FALSE
TP53 p.130	10	4377	0.00553022	0.105233	-0.0997032	0.354991	0.735716	-0.135625	0.280862	0.135519	0.67268	-0.0983446	0.751315	0.321157	0.705354	FALSE
TP53 p.E286Q	4	4377	-0.0440047	0.105233	-0.149238	0.565332	0.735716	-0.202876	0.263983	0.202848	0.67376	-0.154965	0.796226	0.319987	0.70569	FALSE
SP1 hotspot T739	3	7098	-0.162584	0.0120511	-0.174635	0.434491	0.738952	-0.23635	0.401931	0.236328	0.675125	-0.17886	0.629849	0.306555	0.706322	FALSE
GATA2 missense	43	7109	0.0584914	0.0131172	0.0453741	0.774631	0.779668	0.058199	0.0585752	0.0581968	0.676401	0.0497705	0.402055	0.0163944	0.70686	FALSE
SMAD4 p.V128A // SMAD4 p.128	3	6912	0.188804	0.0115843	0.17722	0.361831	0.747385	0.237146	0.489787	0.23712	0.678891	0.17844	0.000111452	0.0537516	0.707672	FALSE
ESR1 interface NCOR2 // ESR1 hotspot Y537	7	7072	0.143421	0.0227464	0.120675	0.557191	0.745607	0.161878	0.216577	0.161847	0.679435	0.116493	0.442145	0.0584041	0.707672	FALSE
TP53 p.S241Y	5	4377	-0.0405312	0.105233	-0.145765	0.4833	0.735716	-0.198178	0.301603	0.198126	0.680632	-0.135561	0.803544	0.322975	0.707672	FALSE
RXRA interface PPARG // RXRA interface NR4A2 // RXRA interface PPARD	14	7108	-0.0750448	-0.00480923	-0.0702356	0.664656	0.656272	-0.10702	0.105672	0.107022	0.68069	-0.0722991	0.514993	0.188704	0.707672	FALSE
NR3C1 truncating	11	7087	0.112121	0.0148519	0.0972692	1.0553	0.797802	0.121857	0.0921722	0.121921	0.681342	0.0989036	0.114612	0.509807	0.707672	FALSE
ZEB1 p.897	4	6972	0.131873	-0.00278721	0.134661	0.527365	0.625483	0.215304	0.255346	0.215291	0.682137	0.128119	0.886304	0.0710143	0.707672	FALSE
E2F6 interface TFDP2	3	7147	0.210208	0.0112273	0.19898	0.676092	0.80813	0.246234	0.29431	0.246223	0.682516	0.19089	0.47057	0.146204	0.707672	FALSE
TP53 p.192del // TP53 p.60del	7	4377	-0.00888227	0.105233	-0.114116	0.691062	0.735716	-0.155121	0.165131	0.155108	0.685212	-0.112824	0.775925	0.333304	0.70907	FALSE
RUNX1 p.R135G	3	7043	-0.19238	-0.0106132	-0.181767	0.836602	0.80282	-0.226408	0.217268	0.226411	0.685924	-0.187506	0.199547	0.924901	0.70907	FALSE
SMAD4 p.95	3	6912	-0.176261	0.0115843	-0.187845	0.768762	0.747385	-0.251334	0.244348	0.251336	0.686157	-0.174192	9.96935e-05	0.0525506	0.70907	FALSE
MITF p.370	4	7095	0.122799	0.00920353	0.113596	1.0749	0.611859	0.185575	0.10568	0.185657	0.686984	0.123285	0.0284333	0.00358969	0.709136	FALSE
CTCF truncating	67	7006	-0.0114528	0.0102334	-0.0216862	0.827458	0.736315	-0.0294162	0.0262082	0.0294523	0.687831	-0.0364149	0.724815	0.00231505	0.709219	FALSE
PLAG1 p.361	3	7089	0.187891	0.0138648	0.174026	1.14524	0.796174	0.218545	0.151956	0.218578	0.68933	0.183731	0.0109231	0.0601873	0.709219	FALSE
NFE2 truncating	8	7110	-0.105454	-0.00750637	-0.0979474	0.832292	0.794719	-0.123242	0.117684	0.123248	0.69013	-0.112038	0.00133253	0.467555	0.709219	FALSE
TP53 p.190	8	4377	0.00225037	0.105233	-0.102983	0.709463	0.735716	-0.139985	0.145156	0.139977	0.690246	-0.103767	0.758135	0.283039	0.709219	FALSE
RARA interface NCOR1	3	7116	0.176841	-0.00846123	0.185302	0.919096	0.781459	0.237111	0.201613	0.237123	0.690886	0.179488	0.443126	0.423513	0.709219	FALSE
BACH1 p.R538Q // BACH1 p.538	3	7077	0.205786	0.0227975	0.182989	0.626364	0.755907	0.242089	0.292145	0.242079	0.692462	0.172635	0.0376595	0.867276	0.710051	FALSE
PPARD missense	44	7115	-0.0373178	-0.00332431	-0.0339935	0.742638	0.68935	-0.0492886	0.045774	0.0493124	0.694841	-0.0408824	0.0912534	2.67049e-05	0.711204	FALSE
RUNX1 interface RUNX1	20	7043	0.0623239	-0.0106132	0.0729371	0.73343	0.80282	0.0908714	0.0994466	0.0908512	0.695119	0.0704483	0.194018	0.946459	0.711204	FALSE
E2F6 interface TFDP1	4	7147	0.170251	0.0112273	0.159023	0.557781	0.80813	0.196801	0.2851	0.196779	0.69706	0.157327	0.469537	0.145574	0.711796	FALSE
TP53 p.R158H	12	4377	0.191271	0.105233	0.0860377	0.781564	0.735716	0.116925	0.110084	0.116944	0.699008	0.0822819	0.797505	0.307454	0.711796	FALSE
NR3C1 p.772 // NR3C1 p.773	5	7087	-0.136474	0.0148519	-0.151325	0.241869	0.797802	-0.189727	0.62565	0.189678	0.699258	-0.137882	0.127122	0.54049	0.711796	FALSE
STAT3 interface PIK3R3	5	7070	0.126856	0.00858331	0.118273	0.760402	0.722323	0.163734	0.15554	0.163739	0.699291	0.124803	0.487282	0.0193114	0.711796	FALSE
MITF truncating	5	7095	0.110566	0.00920353	0.101362	0.567881	0.611859	0.165669	0.178492	0.165662	0.699533	0.105565	0.0268095	0.00316663	0.711796	FALSE
EBF1 truncating	9	7063	-0.0875637	-0.00307619	-0.0844875	0.653883	0.709891	-0.119025	0.129209	0.119015	0.701044	-0.0908626	0.0212908	0.066274	0.712502	FALSE
MAZ inframe indel	5	7119	-0.124027	0.0254748	-0.149502	0.286963	0.852437	-0.175426	0.520981	0.175382	0.701763	-0.146071	0.579871	0.906623	0.712502	FALSE
CEBPA interface DDIT3	4	7121	0.134667	0.00504518	0.129621	0.807141	0.687317	0.188576	0.160593	0.188591	0.703489	0.130893	0.656549	0.372797	0.713475	FALSE
STAT6 missense	68	7073	0.0483224	0.00794111	0.0403812	0.848333	0.790623	0.051039	0.0476007	0.0510752	0.704891	0.0364619	0.0289041	8.19717e-06	0.7141	FALSE
SPI1 truncating	5	7126	-0.107027	0.00604363	-0.11307	0.61276	0.772058	-0.146468	0.184526	0.146453	0.706904	-0.129821	0.0123214	0.0752357	0.7141	FALSE
SMAD4 p.144	5	6912	0.127588	0.0115843	0.116004	0.493695	0.747385	0.155238	0.234971	0.155213	0.70781	0.125176	0.000114895	0.0543837	0.7141	FALSE
TP53 p.196	4	4377	0.243176	0.105233	0.137943	0.767287	0.735716	0.187489	0.17978	0.187495	0.707928	0.137908	0.804432	0.303117	0.7141	FALSE
RUNX2 p.Q57E // RUNX2 p.Q71E // RUNX2 p.57 // RUNX2 p.71	8	7074	0.0831131	0.00588739	0.0772257	0.596252	0.71648	0.107801	0.129518	0.107785	0.707953	0.094852	0.000143499	0.0981588	0.7141	FALSE
TP53 p.283	7	4377	0.212079	0.105233	0.106845	0.556918	0.735716	0.145269	0.191851	0.145226	0.71133	0.103012	0.76806	0.322394	0.715163	FALSE
MEF2A p.Q428P // MEF2A p.428	3	7111	-0.147837	-0.00635796	-0.141479	0.572078	0.835806	-0.169285	0.247307	0.169272	0.711686	-0.178251	0.728747	0.000108143	0.715163	FALSE
TP53 p.K132R	5	4377	-0.0171439	0.105233	-0.122377	0.669844	0.735716	-0.166351	0.182695	0.166338	0.712064	-0.121522	0.755641	0.296951	0.715163	FALSE
RUNX2 MAPK3 phosphorylation loss	4	7074	-0.0833689	0.00588739	-0.0892563	0.77259	0.71648	-0.124572	0.115529	0.124576	0.71209	-0.132197	0.000206279	0.110171	0.715163	FALSE
SMAD4 p.E337G	5	6912	-0.132866	0.0115843	-0.144451	0.70856	0.747385	-0.19328	0.203865	0.193275	0.713422	-0.122658	9.22567e-05	0.0570531	0.715713	FALSE
TP53 p.R209fs // TP53 p.R77fs	8	4377	0.00621461	0.105233	-0.0990188	0.905458	0.735716	-0.134533	0.109358	0.134588	0.71418	-0.095432	0.758922	0.343634	0.715713	FALSE
HIF1A truncating	15	7094	0.0784335	0.0122605	0.066173	0.876448	0.701366	0.0942965	0.0755013	0.0943487	0.715109	0.0662179	0.891018	0.797235	0.71587	FALSE
TP53 p.S33fs	3	4377	-0.0363278	0.105233	-0.141561	0.926542	0.735716	-0.192387	0.152785	0.192413	0.717354	-0.15393	0.814937	0.323569	0.716891	FALSE
TP53 p.V274F	3	4377	-0.0501186	0.105233	-0.155352	0.267214	0.735716	-0.2112	0.581378	0.211158	0.717673	-0.153646	0.790338	0.32012	0.716891	FALSE
TP53 p.S127P	3	4377	0.260795	0.105233	0.155561	0.415298	0.735716	0.211475	0.374577	0.211442	0.718689	0.153083	0.767517	0.330218	0.717134	FALSE
E2F1 interface TFDP1 // E2F1 interface TFDP2	6	7118	0.104531	0.0161861	0.0883449	0.989078	0.635182	0.139016	0.0893205	0.139086	0.720764	0.0926893	0.0341465	0.000459885	0.718432	FALSE
TP53 p.T125M	4	4377	0.23839	0.105233	0.133156	0.770528	0.735716	0.180983	0.172812	0.180989	0.726515	0.128786	0.81214	0.345338	0.721919	FALSE
MEF2A hotspot S98	5	7111	0.0992308	-0.00635796	0.105589	0.415293	0.835806	0.126358	0.254251	0.126332	0.727025	0.130405	0.72777	0.000103944	0.721919	FALSE
TP53 p.V122fs	5	4377	-0.00422947	0.105233	-0.109463	0.467858	0.735716	-0.148825	0.233966	0.148784	0.72728	-0.114857	0.791738	0.328575	0.721919	FALSE
TP53 p.L130V	5	4377	-0.00723084	0.105233	-0.112464	0.304318	0.735716	-0.152922	0.369562	0.152864	0.727623	-0.114644	0.781832	0.328223	0.721919	FALSE
RXRA interface NCOA1 // RXRA 3D hotspot 227-458-1fm6 // RXRA 3D hotspot 227-458-1xv9 // RXRA 3D hotspot 227-458-1xvp // RXRA 3D hotspot 227-458-2zy0	12	7108	-0.0694747	-0.00480923	-0.0646655	0.743669	0.656272	-0.0985129	0.0869546	0.0985345	0.728855	-0.0658077	0.52981	0.188575	0.721919	FALSE
SMAD3 p.268	5	7093	0.162174	0.0178004	0.144374	0.549724	0.833442	0.173254	0.262629	0.173226	0.72893	0.128942	0.00012001	0.000139964	0.721919	FALSE
CTCF p.47	3	7006	0.144481	0.0102334	0.134248	1.06061	0.736315	0.182296	0.126576	0.182324	0.730596	0.146365	0.644157	0.00163478	0.722764	FALSE
TP53 p.S127F	5	4377	-0.00535542	0.105233	-0.110589	0.362305	0.735716	-0.150367	0.305237	0.150315	0.731408	-0.112989	0.799285	0.319293	0.722764	FALSE
ARNT interface NCOA2	3	7096	-0.145159	0.0112526	-0.156411	0.500776	0.753662	-0.207552	0.312338	0.207535	0.73227	-0.148809	0.00282411	0.0509939	0.722764	FALSE
TP53 p.F196fs // TP53 p.F328fs // TP53 p.S15fs	4	4377	-0.0158971	0.105233	-0.121131	0.808301	0.735716	-0.164631	0.149858	0.164643	0.733444	-0.125392	0.767085	0.342671	0.722764	FALSE
RUNX1 p.254	3	7043	-0.162045	-0.0106132	-0.151432	0.817232	0.80282	-0.188624	0.185299	0.188625	0.735509	-0.156629	0.198946	0.922319	0.722764	FALSE
TP53 p.Y205C	17	4377	0.0456141	0.105233	-0.0596194	0.673423	0.735716	-0.0810598	0.0885318	0.0810359	0.736229	-0.0602245	0.826383	0.374113	0.722764	FALSE
SP3 p.R596W	3	7104	-0.13519	-0.011929	-0.123261	0.181768	0.704127	-0.175078	0.678122	0.175055	0.736523	-0.136673	0.10892	0.000412707	0.722764	FALSE
TP53 p.G245V	15	4377	0.167521	0.105233	0.0622873	0.970243	0.735716	0.0845626	0.0641976	0.0846622	0.737043	0.0640015	0.747099	0.345829	0.722764	FALSE
MITF p.245	3	7095	-0.0943765	0.00920353	-0.10358	0.518118	0.611859	-0.169294	0.199916	0.169287	0.737344	-0.118432	0.0274127	0.00339056	0.722764	FALSE
RARA interface RXRG	3	7116	-0.162648	-0.00846123	-0.154186	0.840011	0.781459	-0.197301	0.183553	0.197306	0.737572	-0.151242	0.429627	0.399137	0.722764	FALSE
TP53 p.161	11	4377	0.0367824	0.105233	-0.0684511	0.59196	0.735716	-0.0930775	0.115635	0.0930401	0.740246	-0.0736449	0.824294	0.312189	0.723498	FALSE
TP53 p.L111P	3	4377	-0.0367314	0.105233	-0.141965	1.54622	0.735716	-0.192811	0.091814	0.192962	0.740595	-0.140825	0.762321	0.357214	0.723498	FALSE
TP53 p.208	3	4377	-0.0390785	0.105233	-0.144312	1.21855	0.735716	-0.196074	0.118429	0.196152	0.740821	-0.140635	0.782243	0.341444	0.723498	FALSE
SMAD4 p.R361H	19	6912	0.0601386	0.0115843	0.0485544	0.78413	0.747385	0.0649572	0.0619213	0.0649657	0.741685	0.0565574	0.000123918	0.0617027	0.723498	FALSE
RELA interface NFKBIE // RELA interface NFKBIA	7	7103	-0.068929	0.00594616	-0.0748752	0.902795	0.709003	-0.105579	0.0829371	0.105606	0.742828	-0.0879546	0.328936	0.00163184	0.723498	FALSE
HNF1A interface HNF1A	4	7095	-0.072788	-0.000901775	-0.0718862	0.540001	0.506109	-0.142033	0.133122	0.142037	0.743775	-0.0827347	0.0129435	0.2373	0.723498	FALSE
RELA interface NFKBIB	8	7103	0.0962713	0.00594616	0.0903252	0.957566	0.709003	0.127346	0.0943278	0.127397	0.743778	0.0819743	0.329011	0.00179828	0.723498	FALSE
SMAD4 p.361	28	6912	-0.0455831	0.0115843	-0.0571673	0.863762	0.747385	-0.0764399	0.0661842	0.0764898	0.745899	-0.0458474	0.000109206	0.0492392	0.724801	FALSE
FOXM1 truncating	19	7088	-0.0285594	0.0110713	-0.0396307	0.457129	0.578136	-0.0685816	0.0866948	0.068549	0.747551	-0.0426768	0.0265215	4.97438e-05	0.725065	FALSE
TP53 p.252	3	4377	0.244077	0.105233	0.138844	1.35897	0.735716	0.188616	0.102168	0.18872	0.74796	0.136668	0.796087	0.316067	0.725065	FALSE
RUNX1 interface CBFB	10	7043	-0.0901928	-0.0106132	-0.0795796	0.920516	0.80282	-0.0991052	0.086451	0.0991251	0.748514	-0.0814731	0.210889	0.911355	0.725065	FALSE
RARA interface RXRA	4	7116	0.108346	-0.00846123	0.116807	0.633636	0.781459	0.149484	0.184344	0.149473	0.750527	0.124283	0.431977	0.403231	0.72589	FALSE
RUNX1 p.150	5	7043	0.11422	-0.0106132	0.124833	1.00396	0.80282	0.155468	0.12434	0.155493	0.75093	0.114059	0.199436	0.916444	0.72589	FALSE
ERG interface ETS2	5	7087	-0.111727	0.00340932	-0.115136	0.717465	0.83359	-0.138131	0.160476	0.138121	0.752618	-0.117554	0.823109	0.326916	0.726764	FALSE
FOXF2 truncating	3	7127	-0.127689	0.0167391	-0.144428	0.520773	0.828414	-0.174357	0.277334	0.174342	0.753632	-0.149995	0.129744	0.000272221	0.726987	FALSE
IKZF1 missense	85	7068	0.0273217	0.00703222	0.0202895	0.979098	0.802483	0.0252112	0.0207227	0.0252834	0.754938	0.0274389	0.929153	0.0327026	0.727423	FALSE
NHLH1 p.8	3	7146	0.138764	0.00288758	0.135877	0.817966	0.698264	0.194582	0.166115	0.194592	0.756139	0.125248	0.323982	0.103241	0.727423	FALSE
E2F7 interface E2F7	3	7053	0.114713	0.0124744	0.102238	0.51689	0.626168	0.163284	0.197795	0.163276	0.757181	0.111743	0.0304345	0.0029324	0.727423	FALSE
LEF1 interface CTNNB1	4	7102	0.143404	0.0152461	0.128157	0.661654	0.786613	0.162933	0.193693	0.162923	0.759471	0.120441	0.416135	0.00552804	0.727423	FALSE
TP53 p.P98fs	5	4377	0.00264002	0.105233	-0.102593	0.843649	0.735716	-0.139427	0.121607	0.139447	0.759999	-0.100602	0.784729	0.319652	0.727423	FALSE
POU2F1 missense	56	7096	-0.022587	-0.0020886	-0.0204984	0.6337	0.668325	-0.0306832	0.0323471	0.0306713	0.760089	-0.0273699	0.00604638	0.493487	0.727423	FALSE
PPARD interface RXRA	15	7115	-0.0429878	-0.00332431	-0.0396635	0.606969	0.68935	-0.0575502	0.0653468	0.0575375	0.760544	-0.0542483	0.0684817	3.5747e-05	0.727423	FALSE
TP53 p.Y126C	3	4377	0.236646	0.105233	0.131412	0.598221	0.735716	0.178632	0.219672	0.178618	0.761108	0.129224	0.78218	0.312965	0.727423	FALSE
TP53 p.209	3	4377	-0.0213344	0.105233	-0.126568	0.660243	0.735716	-0.172041	0.191699	0.172034	0.761139	-0.129202	0.790435	0.332596	0.727423	FALSE
SMAD4 p.C324R // SMAD4 p.324	3	6912	-0.135668	0.0115843	-0.147252	1.71976	0.747385	-0.196901	0.0856237	0.197023	0.764096	-0.12945	9.74879e-05	0.0469909	0.728756	FALSE
SMAD4 p.97	3	6912	0.140909	0.0115843	0.129325	0.619595	0.747385	0.173045	0.208725	0.173037	0.764105	0.129388	9.56966e-05	0.0541409	0.728756	FALSE
PLAG1 p.P376fs // PLAG1 p.P458fs	3	7089	-0.125956	0.0138648	-0.139821	0.839716	0.796174	-0.175614	0.16651	0.175616	0.76583	-0.136866	0.00986445	0.0674779	0.729113	FALSE
EZH2 p.207	10	7038	-0.076691	-0.000757567	-0.0759334	0.649383	0.81527	-0.0931608	0.116932	0.093139	0.767357	-0.0763071	0.144066	0.772449	0.729113	FALSE
SMAD4 truncating	48	6912	-0.0295662	0.0115843	-0.0411505	0.721293	0.747385	-0.0550721	0.057051	0.0550593	0.767569	-0.0319853	8.12751e-05	0.0526087	0.729113	FALSE
NFKB1 interface NOTCH1	5	7096	0.102136	0.00912631	0.0930099	0.355792	0.753031	0.123541	0.261416	0.123514	0.767622	0.0994718	0.436929	0.00181734	0.729113	FALSE
TP53 p.211	4	4377	0.00327944	0.105233	-0.101954	0.530816	0.735716	-0.138601	0.19207	0.138578	0.769021	-0.108088	0.775926	0.309828	0.729695	FALSE
TCF12 interface TCF21 // TCF12 interface TAL2	4	7074	0.091689	0.0029203	0.0887687	0.465931	0.680525	0.130456	0.190519	0.130442	0.771487	0.0987489	0.000159765	0.0829313	0.731287	FALSE
TCF12 interface TCF3 // TCF12 interface MYF6 // TCF12 interface TCF23	4	7074	0.091689	0.0029203	0.0887687	0.465931	0.680525	0.130456	0.190519	0.130442	0.771487	0.0987489	0.000159765	0.0829313	0.731287	FALSE
ZNF423 p.D638N // ZNF423 p.D698N // ZNF423 p.638 // ZNF423 p.698	3	6936	-0.105335	-0.00236767	-0.102968	1.01507	0.653417	-0.157551	0.101439	0.157583	0.772411	-0.109149	0.0551503	0.297365	0.731416	FALSE
ERG p.P288fs // ERG p.P312fs // ERG p.P380fs // ERG p.P381fs // ERG p.P387fs // ERG p.P388fs // ERG p.P404fs // ERG p.P411fs	5	7087	0.108954	0.00340932	0.105544	0.572538	0.83359	0.126633	0.184345	0.126614	0.775341	0.106441	0.799959	0.334308	0.733442	FALSE
TP53 p.Q185fs // TP53 p.Q317fs	3	4377	-0.0101834	0.105233	-0.115417	0.938357	0.735716	-0.156854	0.122999	0.156877	0.777266	-0.120248	0.770982	0.340786	0.7335	FALSE
RUNX1 p.G138S	3	7043	0.128507	-0.0106132	0.139121	0.244717	0.80282	0.173312	0.568495	0.17329	0.777307	0.131157	0.19564	0.902729	0.7335	FALSE
POU3F2 p.G427fs	3	7121	0.118408	0.0103698	0.108038	0.474519	0.779478	0.138615	0.227679	0.138603	0.777778	0.126976	0.000631579	0.971631	0.7335	FALSE
TP53 p.R283P	6	4377	0.196036	0.105233	0.0908026	0.608299	0.735716	0.123443	0.149273	0.123421	0.780726	0.0837002	0.765557	0.320566	0.7335	FALSE
TP53 p.274	11	4377	0.0426861	0.105233	-0.0625474	0.640485	0.735716	-0.0850392	0.0976563	0.0850157	0.780773	-0.0618101	0.795945	0.338786	0.7335	FALSE
RXRA interface NR4A1	16	7108	-0.0490588	-0.00480923	-0.0442496	0.7822	0.656272	-0.0673958	0.0565707	0.0674257	0.780823	-0.0457744	0.537407	0.174937	0.7335	FALSE
TP53 p.240	3	4377	-0.0269651	0.105233	-0.132199	0.703223	0.735716	-0.179691	0.187989	0.179687	0.780935	-0.118285	0.791404	0.322651	0.7335	FALSE
TCF12 p.589	3	7074	0.111595	0.0029203	0.108675	0.568559	0.680525	0.159699	0.19114	0.159692	0.783262	0.107989	0.000160445	0.0830228	0.734942	FALSE
RUNX1 p.135	6	7043	-0.091668	-0.0106132	-0.0810547	0.60161	0.80282	-0.100978	0.13473	0.100963	0.784796	-0.0895505	0.195809	0.913559	0.735637	FALSE
TP53 p.Y163H	7	4377	0.184249	0.105233	0.0790157	0.813711	0.735716	0.107383	0.0971054	0.1074	0.787434	0.0750909	0.793679	0.332418	0.735921	FALSE
RXRA interface NR1H4	18	7108	-0.0452244	-0.00480923	-0.0404152	0.718021	0.656272	-0.0615684	0.0562869	0.0615829	0.787514	-0.0417973	0.523633	0.171141	0.735921	FALSE
STAT3 interface STAT5B	6	7070	0.0867355	0.00858331	0.0781522	1.2101	0.722323	0.108127	0.0645831	0.108196	0.788183	0.0792911	0.470058	0.0179688	0.735921	FALSE
TP53 interaction decreasing BCL2L1 // TP53 p.R280K	10	4377	0.0457528	0.105233	-0.0594806	0.912829	0.735716	-0.0808026	0.0651608	0.0808473	0.788271	-0.0626045	0.772867	0.34977	0.735921	FALSE
TCF4 interface EP300 // TCF4 interface CREBBP	3	7063	-0.118675	0.0263794	-0.145054	0.824857	0.787235	-0.184255	0.175853	0.184257	0.790928	-0.120475	0.00108119	0.362282	0.737214	FALSE
STAT1 inframe indel	3	7068	-0.0994596	0.0134036	-0.112863	1.03489	0.798822	-0.141274	0.109058	0.141287	0.79261	-0.12123	0.841074	0.000206481	0.737214	FALSE
BACH1 inframe indel	3	7077	-0.0955539	0.0227975	-0.118351	0.528154	0.755907	-0.15658	0.224085	0.156569	0.792626	-0.114741	0.0377805	0.876289	0.737214	FALSE
GATA3 p.293	5	6972	0.12502	0.0233682	0.101652	0.728415	0.702129	0.144774	0.139553	0.144777	0.793166	0.0823731	0.171517	0.0507539	0.737214	FALSE
MITF p.N317D // MITF p.N430D	3	7095	-0.0675518	0.00920353	-0.0767554	0.446375	0.611859	-0.125454	0.171952	0.125446	0.793826	-0.0922768	0.0274882	0.00352955	0.737214	FALSE
TP53 p.V97fs	3	4377	0.211435	0.105233	0.106202	0.766089	0.735716	0.144349	0.138629	0.144352	0.794422	0.110757	0.786786	0.339694	0.737214	FALSE
RARA missense	39	7116	0.0218963	-0.00846123	0.0303575	0.750967	0.781459	0.0388552	0.0404246	0.0388473	0.795575	0.0325109	0.443638	0.428812	0.737546	FALSE
PPARG interface RXRB	9	7105	0.078843	0.0141343	0.0647087	0.645944	0.750058	0.0862842	0.100177	0.0862716	0.797983	0.064028	0.400952	0.229959	0.73904	FALSE
TP63 p.A139T	3	6997	-0.083825	0.0104275	-0.0942525	1.09723	0.678513	-0.138878	0.0859007	0.13891	0.799274	-0.0996789	0.762436	0.15388	0.739191	FALSE
BATF missense	15	7144	-0.0440813	0.00866648	-0.0527478	0.901341	0.783472	-0.0673043	0.0585214	0.0673256	0.799739	-0.0514135	0.229237	0.10245	0.739191	FALSE
TP63 p.R379C // TP63 p.379	7	6997	0.0651892	0.0104275	0.0547617	0.467972	0.678513	0.0807265	0.117019	0.0807084	0.802382	0.0642257	0.783691	0.162562	0.740407	FALSE
SMAD4 p.531	5	6912	0.0804626	0.0115843	0.0688783	1.03323	0.747385	0.0921348	0.0666631	0.0921591	0.803515	0.0831174	0.000107017	0.0498843	0.740407	FALSE
ESR1 interface ESR2	8	7072	-0.0547874	0.0227464	-0.0775338	0.703514	0.745607	-0.103993	0.110209	0.103987	0.804027	-0.0654535	0.410177	0.0586391	0.740407	FALSE
TP53 p.177	7	4377	0.172965	0.105233	0.0677319	0.492429	0.735716	0.0920974	0.137547	0.0920626	0.804246	0.0689643	0.836077	0.313356	0.740407	FALSE
SMAD3 p.R268C	3	7093	-0.0757422	0.0178004	-0.0935426	0.621815	0.833442	-0.112244	0.150435	0.112237	0.806972	-0.117361	0.000119316	0.000138772	0.74218	FALSE
NANOG truncating	5	7131	0.0493902	-0.0140228	0.063413	0.468243	0.680918	0.0931424	0.135428	0.0931286	0.807862	0.0740983	0.479578	0.23869	0.742263	FALSE
TP53 p.S215R	4	4377	0.189129	0.105233	0.0838958	1.07246	0.735716	0.113989	0.0782277	0.114033	0.811341	0.0879047	0.729575	0.295816	0.743789	FALSE
HNF1A p.114	3	7095	-0.0559029	-0.000901775	-0.0550011	0.289584	0.506109	-0.108685	0.189932	0.108674	0.812481	-0.0693211	0.0138552	0.253573	0.743789	FALSE
REST missense	97	7047	0.000762362	-0.0109079	0.0116703	0.580473	0.542992	0.0214719	0.0201048	0.0214925	0.813436	0.0131199	0.613652	0.223123	0.743789	FALSE
MAX interface MXI1	12	7127	0.0475518	0.00446329	0.0430885	0.809713	0.773813	0.0556793	0.0532145	0.0556833	0.814809	0.0523306	0.270509	0.000368218	0.743789	FALSE
SMAD4 p.428	3	6912	0.100988	0.0115843	0.0894035	0.576004	0.747385	0.119629	0.155213	0.119622	0.816515	0.100023	0.000114729	0.053005	0.743789	FALSE
TP53 p.285	17	4377	0.063121	0.105233	-0.0421124	1.03207	0.735716	-0.0571394	0.0408037	0.05724	0.816846	-0.041517	0.803253	0.412952	0.743789	FALSE
TP53 p.E285K	15	4377	0.14757	0.105233	0.0423364	1.0575	0.735716	0.057447	0.0400344	0.0575445	0.817866	0.0439288	0.813657	0.39765	0.743789	FALSE
ESR2 interface NCOR1	3	7099	0.136172	0.0103117	0.12586	0.266385	0.856089	0.147036	0.472474	0.147017	0.818347	0.113463	0.0149564	0.00423205	0.743789	FALSE
TP53 p.P177R	3	4377	0.0043226	0.105233	-0.100911	0.551927	0.735716	-0.137174	0.182834	0.13716	0.819065	-0.0972089	0.795223	0.319404	0.743789	FALSE
ESR1 interface FN1	9	7072	-0.0264409	0.0227464	-0.0491872	0.879556	0.745607	-0.0659548	0.0559228	0.0659694	0.819848	-0.0566807	0.417522	0.0579442	0.743789	FALSE
SMAD4 p.R361C	7	6912	-0.071317	0.0115843	-0.0829012	1.06925	0.747385	-0.110871	0.077532	0.110922	0.8199	-0.0643047	8.88293e-05	0.047487	0.743789	FALSE
TP53 p.G244D	6	4377	0.168943	0.105233	0.06371	0.431418	0.735716	0.0866284	0.147676	0.0865959	0.820348	0.0682607	0.790473	0.335378	0.743789	FALSE
FOXA2 truncating	10	7101	-0.0364627	0.0132101	-0.0496729	0.52404	0.580618	-0.0855617	0.0947883	0.0855517	0.820614	-0.0416852	0.0610841	0.981245	0.743789	FALSE
TP53 p.R280S	3	4377	0.01054	0.105233	-0.0946935	1.15613	0.735716	-0.128666	0.0819052	0.128709	0.822564	-0.0953821	0.784384	0.329357	0.743789	FALSE
TFAP2A missense	50	7104	0.00600171	-0.0147411	0.0207428	0.890965	0.851241	0.0243597	0.0232813	0.0243677	0.822785	0.0270691	0.172024	0.0707967	0.743789	FALSE
TBP p.Q43delinsQQ	13	7113	-0.049553	-0.000902505	-0.0486505	0.668514	0.818471	-0.0594574	0.0727741	0.0594407	0.823945	-0.0505388	0.661446	0.133667	0.743789	FALSE
TP53 p.R248P	3	4377	0.0151277	0.105233	-0.0901058	0.705435	0.735716	-0.122476	0.127731	0.122474	0.824144	-0.094443	0.776112	0.338049	0.743789	FALSE
RARA interface NR1H2	5	7116	0.0628473	-0.00846123	0.0713085	0.558097	0.781459	0.0912631	0.127771	0.0912505	0.824636	0.0774733	0.430675	0.405588	0.743789	FALSE
FOS missense	26	7132	-0.00717142	0.0207562	-0.0279277	0.517452	0.677012	-0.0412813	0.0539715	0.0412513	0.824819	-0.029419	0.0267248	0.868175	0.743789	FALSE
ZEB1 p.905	3	6972	-0.0853116	-0.00278721	-0.0825244	0.744942	0.625483	-0.131929	0.11078	0.131937	0.827863	-0.0785693	0.893111	0.0663033	0.743789	FALSE
MAX interface MYC // MAX interface MAX	14	7127	0.0470409	0.00446329	0.0425776	0.750499	0.773813	0.0550261	0.0567324	0.0550231	0.82964	0.0445043	0.270676	0.000369216	0.743789	FALSE
TP53 p.L111Q	3	4377	0.0176964	0.105233	-0.087537	0.440745	0.735716	-0.119	0.198612	0.118982	0.830488	-0.0909722	0.788849	0.332065	0.743789	FALSE
SMAD4 p.S144L	4	6912	-0.0719997	0.0115843	-0.083584	0.243744	0.747385	-0.111857	0.342917	0.111835	0.832215	-0.0790908	0.00010916	0.0552751	0.743789	FALSE
E2F7 interface E2F8	3	7053	-0.077481	0.0124744	-0.0899554	0.711968	0.626168	-0.143654	0.126347	0.14366	0.832916	-0.0762607	0.0295788	0.00279621	0.743789	FALSE
SMAD3 missense	61	7093	0.0408327	0.0178004	0.0230323	0.841655	0.833442	0.0276329	0.0273655	0.0276352	0.833204	0.0225385	9.48882e-05	0.000274872	0.743789	FALSE
TP53 p.P151H	5	4377	0.0293059	0.105233	-0.0759275	0.449949	0.735716	-0.103232	0.168747	0.103202	0.833829	-0.069075	0.772295	0.337009	0.743789	FALSE
MAX interface MYCN	15	7127	0.040368	0.00446329	0.0359048	0.788661	0.773813	0.046398	0.0455262	0.0463998	0.833978	0.0418903	0.270249	0.000339907	0.743789	FALSE
LEF1 inframe indel	3	7102	-0.0688761	0.0152461	-0.0841222	1.05178	0.786613	-0.10693	0.0799805	0.106942	0.83445	-0.0949115	0.430319	0.00522898	0.743789	FALSE
FOXI1 missense	64	7087	0.000341278	0.0299229	-0.0295816	0.599134	0.7641	-0.0387802	0.0493739	0.0387143	0.834772	-0.0199767	0.00579962	0.0746632	0.743789	FALSE
TP53 p.D281E	3	4377	0.0123964	0.105233	-0.092837	1.41457	0.735716	-0.126108	0.0656293	0.126186	0.834913	-0.088629	0.746999	0.328151	0.743789	FALSE
SP1 hotspot S728	3	7098	0.102055	0.0120511	0.090004	0.188717	0.738952	0.121816	0.476925	0.1218	0.83502	0.0888932	0.641946	0.314142	0.743789	FALSE
NR3C1 interface NR4A1 // NR3C1 interface HNF4A // NR3C1 interface NR1H3	3	7087	-0.0962176	0.0148519	-0.111069	0.476487	0.797802	-0.139232	0.233101	0.139219	0.83745	-0.0945383	0.128518	0.544541	0.743789	FALSE
TP53 p.Y220S	4	4377	0.0249997	0.105233	-0.0802338	0.455845	0.735716	-0.109078	0.176011	0.109055	0.837826	-0.0753295	0.775474	0.322202	0.743789	FALSE
TP53 p.10del // TP53 p.142del // TP53 p.49del	4	4377	0.0222589	0.105233	-0.0829745	0.561471	0.735716	-0.112797	0.147781	0.112781	0.838973	-0.0748274	0.770385	0.312098	0.743789	FALSE
ESR1 interface NR0B2	7	7072	-0.046367	0.0227464	-0.0691134	0.747677	0.745607	-0.0926939	0.0924374	0.0926941	0.839129	-0.0572454	0.412734	0.0587055	0.743789	FALSE
TP53 p.277	8	4377	0.158087	0.105233	0.0528536	0.693847	0.735716	0.071846	0.0761747	0.0718397	0.840043	0.0525548	0.8325	0.337658	0.743789	FALSE
TP53 p.156	4	4377	0.190798	0.105233	0.0855641	0.585506	0.735716	0.116315	0.146137	0.116301	0.841461	0.0736559	0.788163	0.322484	0.743789	FALSE
SP1 hotspot S732	4	7098	0.0891946	0.0120511	0.0771435	0.156219	0.738952	0.104417	0.493816	0.104396	0.841645	0.073847	0.641553	0.314519	0.743789	FALSE
ARNT interface SIM2	9	7096	0.0487836	0.0112526	0.037531	0.68301	0.753662	0.0498032	0.0549494	0.0497982	0.841714	0.0501649	0.00315342	0.051956	0.743789	FALSE
HNF4A p.386	3	7067	0.062321	0.00625093	0.0560701	0.20501	0.452004	0.124062	0.273499	0.124048	0.842054	0.052017	0.327383	0.669261	0.743789	FALSE
SMAD3 truncating	8	7093	-0.0491729	0.0178004	-0.0669733	0.783291	0.833442	-0.0803622	0.0855025	0.0803576	0.842921	-0.0583096	0.000107523	9.92911e-05	0.743789	FALSE
SMAD3 interface NEDD4L	3	7093	0.0817836	0.0178004	0.0639832	0.527756	0.833442	0.0767764	0.121236	0.0767699	0.844353	0.0943189	0.000123576	0.000126924	0.743789	FALSE
RXRA interface VDR // RXRA interface NR1I3	12	7108	-0.0426346	-0.00480923	-0.0378253	0.7183	0.656272	-0.0576278	0.0526595	0.0576366	0.844494	-0.0372394	0.529425	0.180112	0.743789	FALSE
AHR interface ARNT	5	7076	-0.0697197	0.0154331	-0.0851528	0.607633	0.759348	-0.112151	0.140139	0.112139	0.844788	-0.0664777	0.00122651	0.171573	0.743789	FALSE
TP53 p.T118fs	4	4377	0.030219	0.105233	-0.0750144	0.447431	0.735716	-0.101983	0.167656	0.101961	0.84898	-0.0700822	0.78994	0.309616	0.746438	FALSE
SMAD4 p.337	6	6912	-0.0657787	0.0115843	-0.0773629	0.654714	0.747385	-0.10352	0.118163	0.103511	0.850246	-0.0575642	9.27537e-05	0.0561939	0.746438	FALSE
ELK4 p.S359fs	4	7129	-0.0668143	-0.00427626	-0.0625381	0.521892	0.786621	-0.0795115	0.11983	0.0795021	0.85025	-0.0742703	0.269747	0.0956656	0.746438	FALSE
TP53 p.P278A	7	4377	0.154047	0.105233	0.0488134	0.637816	0.735716	0.0663595	0.0765322	0.0663482	0.851015	0.0522774	0.741484	0.325795	0.746438	FALSE
TCF12 truncating	26	7074	0.0220423	0.0029203	0.019122	0.757789	0.680525	0.0280871	0.025234	0.028099	0.854095	0.0245744	9.82385e-05	0.0820259	0.748432	FALSE
TP53 hotspot S9	3	4377	0.0224735	0.105233	-0.08276	0.621336	0.735716	-0.112496	0.133197	0.112489	0.855806	-0.0772432	0.790719	0.330418	0.749224	FALSE
EZH2 p.D620Y // EZH2 p.D659Y	3	7038	-0.098259	-0.000757567	-0.0975014	1.66483	0.81527	-0.11954	0.0585654	0.119594	0.859617	-0.0833357	0.147623	0.810273	0.751851	FALSE
FOS hotspot T331	4	7132	0.0851717	0.0207562	0.0644155	0.464598	0.677012	0.0951572	0.138648	0.0951467	0.861423	0.0590933	0.0301785	0.8673	0.752721	FALSE
PLAG1 truncating	12	7089	-0.0426368	0.0138648	-0.0565016	0.934274	0.796174	-0.0709456	0.0604765	0.0709663	0.863628	-0.0395092	0.00878056	0.074231	0.753897	FALSE
TP53 p.K188fs // TP53 p.K320fs // TP53 p.R7fs	3	4377	0.0481138	0.105233	-0.0571196	0.330868	0.735716	-0.0776523	0.172636	0.0776382	0.864394	-0.072629	0.758124	0.321382	0.753897	FALSE
ZNF263 p.585	3	7107	-0.0632563	0.005786	-0.0690423	0.442144	0.790342	-0.087366	0.156153	0.0873575	0.865391	-0.0773431	0.517667	0.0190136	0.754033	FALSE
TP53 p.124del // TP53 p.256del	3	4377	0.0300478	0.105233	-0.0751856	0.599645	0.735716	-0.102202	0.125384	0.102194	0.867392	-0.0709615	0.781702	0.331853	0.754033	FALSE
TFAP2C missense	50	7105	0.0304914	0.0184915	0.0119998	0.784665	0.79474	0.0151004	0.015293	0.0150991	0.867457	0.0188199	0.16678	0.0168459	0.754033	FALSE
CEBPA hotspot S190	4	7121	0.0546073	0.00504518	0.0495621	1.00266	0.687317	0.0720924	0.0494305	0.0721095	0.8678	0.0572572	0.684328	0.382756	0.754033	FALSE
E2F7 p.R185H // E2F7 p.185	3	7053	-0.0381594	0.0124744	-0.0506338	0.75111	0.626168	-0.0808578	0.0674119	0.0808628	0.869072	-0.0595769	0.0319705	0.00304667	0.75437	FALSE
ESR1 interface NRIP1	8	7072	0.0742261	0.0227464	0.0514797	0.883121	0.745607	0.0690303	0.0582929	0.069044	0.869813	0.0432524	0.427757	0.0574241	0.75437	FALSE
TP53 p.V274G	3	4377	0.0271743	0.105233	-0.0780592	0.464894	0.735716	-0.106114	0.167907	0.1061	0.871698	-0.0686487	0.780147	0.322191	0.754907	FALSE
PBX1 missense	60	7096	-0.0153688	0.00731086	-0.0226796	0.699754	0.660515	-0.034319	0.0324108	0.0343363	0.872059	-0.0137923	0.0124343	0.00658214	0.754907	FALSE
E2F7 p.K59fs	4	7053	-0.0356059	0.0124744	-0.0480802	0.511829	0.626168	-0.0767902	0.093938	0.0767848	0.873201	-0.0499496	0.0303652	0.00312302	0.75519	FALSE
TP53 p.V173fs // TP53 p.V41fs // TP53 p.V80fs	3	4377	0.03972	0.105233	-0.0655134	0.20943	0.735716	-0.0890659	0.312817	0.0890472	0.874848	-0.0669462	0.786356	0.318403	0.755719	FALSE
ELF5 missense	24	7134	0.042009	0.0138509	0.0281581	0.760743	0.837397	0.0336352	0.037014	0.0336257	0.875441	0.0268375	0.435633	0.853865	0.755719	FALSE
ZNF423 p.398	3	6936	-0.0618444	-0.00236767	-0.0594767	1.40119	0.653417	-0.0909769	0.0424473	0.0910241	0.877634	-0.0581199	0.0569061	0.307649	0.756615	FALSE
ZEB1 p.308	3	6972	-0.0527852	-0.00278721	-0.049998	0.621169	0.625483	-0.0799352	0.0804902	0.0799351	0.878109	-0.0554134	0.872615	0.0707964	0.756615	FALSE
TP53 p.C242Y	3	4377	0.157448	0.105233	0.0522144	0.627648	0.735716	0.0709753	0.0831906	0.0709709	0.879071	0.0646866	0.77568	0.322065	0.756741	FALSE
EZH2 truncating	17	7038	0.0260738	-0.000757567	0.0268314	0.910975	0.81527	0.0329017	0.0294535	0.032911	0.879967	0.0299076	0.155399	0.768809	0.756811	FALSE
TP53 p.125	7	4377	0.0724755	0.105233	-0.032758	0.775772	0.735716	-0.0445219	0.0422263	0.0445253	0.885661	-0.0400496	0.819267	0.349156	0.760457	FALSE
TP53 p.168	4	4377	0.048275	0.105233	-0.0569584	0.697795	0.735716	-0.0774217	0.0816263	0.0774191	0.885846	-0.0528483	0.816025	0.33317	0.760457	FALSE
E2F1 p.165	3	7118	0.054367	0.0161861	0.0381809	0.494964	0.635182	0.0601135	0.0771388	0.0601102	0.887447	0.0518653	0.0356105	0.000462596	0.761127	FALSE
MAX interface MXD1 // MAX interface MXD4 // MAX interface MNT // MAX interface MXD3	13	7127	0.0292182	0.00446329	0.0247549	0.778054	0.773813	0.0319905	0.0318164	0.0319908	0.888489	0.0300972	0.271615	0.000374893	0.761318	FALSE
ZEB1 missense	155	6972	-0.0125757	-0.00278721	-0.00978851	0.728265	0.625483	-0.0155897	0.0134409	0.0156495	0.89239	-0.00691031	0.751696	0.0436254	0.762237	FALSE
TP53 p.Y205H	3	4377	0.0602188	0.105233	-0.0450146	0.0597325	0.735716	-0.0611987	0.753603	0.0611848	0.893864	-0.0567088	0.782434	0.32223	0.762237	FALSE
ATF2 p.352	3	7113	-0.0461085	0.00836152	-0.05447	0.645289	0.817718	-0.0666157	0.0844119	0.0666122	0.894248	-0.0627877	0.249247	0.664713	0.762237	FALSE
AHR missense	78	7076	-0.0038632	0.0154331	-0.0192963	0.679361	0.759348	-0.025439	0.0284036	0.0254117	0.894776	-0.0114181	0.0012903	0.134974	0.762237	FALSE
TP53 p.P278H	3	4377	0.168101	0.105233	0.0628671	0.862931	0.735716	0.085443	0.072853	0.0854503	0.89484	0.0562086	0.844487	0.331353	0.762237	FALSE
MEF2A p.P99S // MEF2A p.99	3	7111	0.0422018	-0.00635796	0.0485597	0.521407	0.835806	0.0581043	0.0931321	0.0580993	0.895338	0.0634353	0.732006	0.000103501	0.762237	FALSE
SREBF1 truncating	7	7093	-0.0226206	0.010322	-0.0329426	0.439572	0.702052	-0.0469353	0.0749424	0.0469232	0.895986	-0.0347017	0.793174	0.22463	0.762237	FALSE
EGR1 truncating	22	7089	-0.0228193	0.0232116	-0.0460309	0.916532	0.843798	-0.0545375	0.0502229	0.054552	0.896922	-0.0233582	0.00661757	0.168152	0.762237	FALSE
BACH1 p.575	3	7077	0.0680051	0.0227975	0.0452076	0.582248	0.755907	0.0598092	0.0776432	0.0598057	0.896983	0.0565216	0.0382117	0.875285	0.762237	FALSE
MEF2A truncating	4	7111	-0.0806672	-0.00635796	-0.0743092	0.378774	0.835806	-0.0889222	0.196184	0.0889073	0.898055	-0.0535046	0.733434	0.000110291	0.762237	FALSE
TP63 interface TP53BP2 // TP63 interface PPP1R13L	3	6997	0.0566449	0.0104275	0.0462174	0.552871	0.678513	0.068119	0.0835954	0.0681158	0.898943	0.0497621	0.766365	0.166564	0.762237	FALSE
TP63 p.E609K // TP63 p.609	4	6997	-0.0438607	0.0104275	-0.0542882	0.520235	0.678513	-0.0800175	0.104353	0.0800105	0.899418	-0.0429043	0.768876	0.166652	0.762237	FALSE
RELA p.127	3	7103	-0.0284705	0.00594616	-0.0344167	0.386183	0.709003	-0.0485471	0.0891202	0.0485423	0.901318	-0.0507439	0.278702	0.00169121	0.762669	FALSE
SMAD3 p.393	3	7093	0.0718406	0.0178004	0.0540402	1.00824	0.833442	0.0648356	0.0535983	0.0648398	0.902236	0.0590104	0.000107092	0.000144275	0.762669	FALSE
STAT2 interface STAT3	3	7080	-0.0467848	0.00670675	-0.0534916	0.799798	0.830492	-0.0644102	0.0668813	0.0644095	0.903625	-0.0580404	0.0906156	0.00628727	0.762669	FALSE
TP63 p.S271L // TP63 p.S365L // TP63 p.271 // TP63 p.365	3	6997	-0.039587	0.0104275	-0.0500145	0.434132	0.678513	-0.0737181	0.115206	0.0737119	0.905001	-0.046764	0.795978	0.161977	0.762669	FALSE
RUNX2 missense	66	7074	0.004899	0.00588739	-0.000988391	0.741007	0.71648	-0.00137907	0.00133385	0.00137951	0.905023	-0.0105712	0.000230092	0.0968667	0.762669	FALSE
TP53 hotspot S6	4	4377	0.14743	0.105233	0.0421964	0.565534	0.735716	0.0573622	0.0746134	0.0573542	0.905353	0.0437709	0.787538	0.325278	0.762669	FALSE
STAT3 interface LCK	4	7070	0.0403062	0.00858331	0.0317229	0.802161	0.722323	0.0439158	0.0395469	0.043918	0.906345	0.0424972	0.486824	0.0183808	0.762669	FALSE
IRF1 missense	25	7131	0.0393754	0.0126859	0.0266894	1.08733	0.839758	0.0317463	0.0245458	0.0317823	0.906973	0.0196788	0.434665	0.00904271	0.762669	FALSE
HSF1 p.S298fs // HSF1 p.S363fs	3	7120	-0.0275428	0.0122887	-0.0398316	1.11222	0.695998	-0.0572169	0.0358128	0.0572294	0.907325	-0.0468089	0.558665	0.285405	0.762669	FALSE
FOXO3 p.250	3	7129	0.0664668	0.0116803	0.0547865	0.153415	0.855333	0.0640615	0.357114	0.0640528	0.910005	0.0558464	0.976963	0.717736	0.763945	FALSE
PPARG interface RXRA // PPARG interface NR2E3	7	7105	0.0458147	0.0141343	0.0316805	0.741619	0.750058	0.0422378	0.042718	0.0422374	0.91049	0.0318877	0.402772	0.230288	0.763945	FALSE
TP53 p.172	4	4377	0.144459	0.105233	0.0392258	0.763065	0.735716	0.0533151	0.0514056	0.0533165	0.913337	0.0400643	0.787681	0.307635	0.764375	FALSE
GATA3 p.M293K	4	6972	0.00435284	0.0233682	-0.0190154	0.781268	0.702129	-0.0270811	0.0243391	0.0270825	0.913616	-0.0380974	0.171749	0.0507577	0.764375	FALSE
TP53 p.233	3	4377	0.146713	0.105233	0.0414794	0.455362	0.735716	0.0563877	0.0910912	0.0563797	0.914074	0.045854	0.769726	0.330593	0.764375	FALSE
ZEB1 p.E456fs // ZEB1 p.E503fs // ZEB1 p.E507fs // ZEB1 p.E523fs // ZEB1 p.E524fs	14	6972	-0.0228925	-0.00278721	-0.0201053	0.692515	0.625483	-0.0321368	0.0290322	0.0321436	0.915707	-0.0177152	0.90984	0.0722199	0.764375	FALSE
TP53 p.R249W	3	4377	0.0526511	0.105233	-0.0525823	0.929885	0.735716	-0.0714612	0.0565471	0.071471	0.916168	-0.0447749	0.774041	0.309439	0.764375	FALSE
TP53 p.S95P // TP53 p.95	3	4377	0.0636679	0.105233	-0.0415655	0.527977	0.735716	-0.056503	0.0787261	0.0564968	0.916343	-0.0446408	0.792507	0.321925	0.764375	FALSE
SMAD4 p.330	3	6912	-0.0947953	0.0115843	-0.10638	0.780062	0.747385	-0.142334	0.136373	0.142336	0.916768	-0.0450752	0.000112396	0.0539718	0.764375	FALSE
ELF5 truncating	3	7134	-0.0315392	0.0138509	-0.0453901	0.506865	0.837397	-0.0542086	0.0895507	0.0542038	0.919358	-0.0489717	0.48019	0.828784	0.764956	FALSE
RXRA 3D hotspot 228-455-3h0a	12	7108	-0.023193	-0.00480923	-0.0183838	0.707027	0.656272	-0.028009	0.0260015	0.0280124	0.919626	-0.0191512	0.524858	0.183941	0.764956	FALSE
RXRA interface THRA // RXRA 3D hotspot 225-456-3a9e // RXRA 3D hotspot 225-462-1lbd	12	7108	-0.023193	-0.00480923	-0.0183838	0.707027	0.656272	-0.028009	0.0260015	0.0280124	0.919626	-0.0191512	0.524858	0.183941	0.764956	FALSE
TP53 p.E286G	5	4377	0.0705426	0.105233	-0.0346908	0.157342	0.735716	-0.047173	0.22048	0.0471525	0.919937	-0.0330813	0.788367	0.322704	0.764956	FALSE
TP53 p.T155P	5	4377	0.0820517	0.105233	-0.0231817	0.373481	0.735716	-0.0315198	0.0620694	0.0315091	0.923343	-0.0316833	0.782396	0.317204	0.765937	FALSE
ARNTL missense	38	7117	0.00699691	-0.00770235	0.0146993	0.738881	0.770354	0.0190851	0.0198939	0.0190812	0.924558	0.0118703	0.243155	0.721254	0.765937	FALSE
PPARD interface NR0B2	7	7115	-0.00343626	-0.00332431	-0.000111946	0.417745	0.68935	-0.000162436	0.000267976	0.000162393	0.925317	-0.0244072	0.0632208	3.20231e-05	0.765937	FALSE
CEBPA truncating	14	7121	-0.0144226	0.00504518	-0.0194678	0.304975	0.687317	-0.0283451	0.0638339	0.0283243	0.926614	-0.0169311	0.643651	0.375339	0.765937	FALSE
TP53 p.C275F	6	4377	0.129198	0.105233	0.0239649	0.852719	0.735716	0.0325672	0.0281041	0.0325736	0.928883	0.0268364	0.809122	0.338404	0.765937	FALSE
TP53 p.L194F	3	4377	0.130209	0.105233	0.0249753	1.70687	0.735716	0.033913	0.0146322	0.0339469	0.929431	0.0376997	0.827437	0.324427	0.765937	FALSE
SMAD4 p.507	8	6912	0.0175052	0.0115843	0.00592091	0.870793	0.747385	0.00792074	0.00679945	0.00792217	0.929758	0.0232859	9.96085e-05	0.0474427	0.765937	FALSE
TP53 p.I195T	18	4377	0.0804566	0.105233	-0.0247768	0.585788	0.735716	-0.033701	0.0422965	0.0336771	0.92993	-0.0152964	0.800627	0.312269	0.765937	FALSE
TP53 p.171	4	4377	0.0726147	0.105233	-0.0326187	0.337499	0.735716	-0.044348	0.0966484	0.044336	0.930067	-0.0322961	0.781364	0.312787	0.765937	FALSE
TP53 p.279	6	4377	0.0782187	0.105233	-0.0270147	0.820639	0.735716	-0.0367138	0.0329191	0.036719	0.930516	-0.0262205	0.806747	0.295371	0.765937	FALSE
FOXO3 truncating	4	7129	-0.0269793	0.0116803	-0.0386596	0.80046	0.855333	-0.0451995	0.0482968	0.0451983	0.93136	-0.0368553	0.979345	0.734727	0.765937	FALSE
RXRA p.S427F	7	7108	0.0206466	-0.00480923	0.0254559	0.667124	0.656272	0.038788	0.0381576	0.0387886	0.931381	0.0213858	0.526266	0.18213	0.765937	FALSE
NR3C1 p.L772P // NR3C1 p.L773P	4	7087	-0.0299018	0.0148519	-0.0447537	0.0477917	0.797802	-0.0561081	0.936431	0.0560962	0.931848	-0.0341208	0.127951	0.544541	0.765937	FALSE
NR3C1 interface RXRB	5	7087	-0.0239403	0.0148519	-0.0387923	0.944718	0.797802	-0.0486184	0.0410623	0.048624	0.933045	-0.0299942	0.130131	0.539075	0.766146	FALSE
TP53 p.255	6	4377	0.124462	0.105233	0.019229	0.898996	0.735716	0.0261292	0.0213895	0.0261365	0.934223	0.0248281	0.830726	0.310105	0.766146	FALSE
BACH1 missense	65	7077	0.0106671	0.0227975	-0.0121304	0.725291	0.755907	-0.0160532	0.0167249	0.0160475	0.934579	-0.00773019	0.0434802	0.733496	0.766146	FALSE
E2F6 missense	13	7147	-0.00928404	0.0112273	-0.0205113	0.785379	0.80813	-0.0253824	0.0261165	0.0253812	0.936637	-0.0178341	0.508419	0.137914	0.767156	FALSE
TP53 p.G199V // TP53 p.199	5	4377	0.133641	0.105233	0.028408	0.672639	0.735716	0.0386156	0.0422336	0.0386127	0.938012	0.0256055	0.783177	0.315297	0.767344	FALSE
SMAD4 interface SKI	9	6912	0.00804424	0.0115843	-0.00354002	0.942683	0.747385	-0.00473493	0.00375526	0.00473654	0.938741	0.0191455	9.63567e-05	0.0524623	0.767344	FALSE
ZNF263 missense	45	7107	-0.00631878	0.005786	-0.0121048	0.871425	0.790342	-0.0153057	0.0138908	0.0153159	0.939347	-0.00899714	0.49536	0.0153922	0.767344	FALSE
ARNTL interface EPAS1	3	7117	-0.0463189	-0.00770235	-0.0386166	0.535736	0.770354	-0.050132	0.0720814	0.0501284	0.944913	-0.0307437	0.271799	0.801452	0.768322	FALSE
TP53 p.E171K	3	4377	0.137199	0.105233	0.0319654	0.381879	0.735716	0.0434553	0.0837056	0.043448	0.945346	0.0291324	0.7795	0.315264	0.768322	FALSE
CTCF p.A201fs	8	7006	0.0166466	0.0102334	0.0064132	1.0858	0.736315	0.00870475	0.00590641	0.00870985	0.945799	0.0177153	0.651635	0.00121291	0.768322	FALSE
SP3 truncating	12	7104	-0.0164078	-0.011929	-0.00447877	0.640089	0.704127	-0.00636159	0.0069971	0.00636074	0.946373	-0.0136794	0.0999775	0.000448957	0.768322	FALSE
TP63 p.376	3	6997	-0.0281257	0.0104275	-0.0385532	1.87517	0.678513	-0.0567663	0.0205598	0.0568201	0.94645	-0.0263494	0.781865	0.167303	0.768322	FALSE
TP53 p.T211fs // TP53 p.T79fs	3	4377	0.0728495	0.105233	-0.0323839	0.537948	0.735716	-0.0440216	0.060199	0.0440169	0.94724	-0.0281215	0.786841	0.310393	0.768322	FALSE
MAX p.H28R // MAX p.28	4	7127	-0.0518525	0.00446329	-0.0563158	0.59338	0.773813	-0.0727833	0.0949068	0.072777	0.947672	-0.0253832	0.29177	0.000314076	0.768322	FALSE
STAT3 interface BMX // STAT3 interface SH2D2A	4	7070	0.0466646	0.00858331	0.0380812	0.684797	0.722323	0.0527217	0.0556095	0.0527205	0.947743	0.0236761	0.454188	0.0169165	0.768322	FALSE
TP53 p.136	8	4377	0.120692	0.105233	0.0154582	0.358902	0.735716	0.021024	0.0430709	0.0210112	0.949585	0.0164567	0.777521	0.324552	0.768322	FALSE
USF1 missense	31	7124	0.000772054	0.00332454	-0.00255249	0.623117	0.716511	-0.00356421	0.00409632	0.00356239	0.950607	-0.0079785	5.80894e-06	0.259517	0.768322	FALSE
FOSL2 truncating	11	7106	0.00571723	-0.00251162	0.00822885	0.541657	0.685512	0.0120071	0.015192	0.0120039	0.951418	-0.0126064	0.0336912	0.189967	0.768322	FALSE
RUNX2 p.S14fs // RUNX2 p.S28fs	7	7074	-0.000416745	0.00588739	-0.00630413	0.709419	0.71648	-0.00879883	0.00888634	0.00879876	0.952444	-0.0161432	0.000177276	0.106433	0.768322	FALSE
TBP p.Q63delinsQQ	14	7113	-0.0114865	-0.000902505	-0.010584	0.657891	0.818471	-0.0129356	0.0160878	0.0129314	0.953274	-0.0128266	0.671558	0.131792	0.768322	FALSE
SREBF2 interface SREBF2	6	7058	-0.0135377	-0.000480323	-0.0130573	0.271604	0.555699	-0.0235035	0.0480749	0.0234971	0.954491	-0.0129514	0.621204	0.92303	0.768322	FALSE
EZH2 interface SUZ12	11	7038	0.00981348	-0.000757567	0.010571	1.06317	0.81527	0.0129599	0.00994294	0.0129663	0.954534	0.014036	0.142551	0.805963	0.768322	FALSE
TP53 p.R248L	5	4377	0.0873064	0.105233	-0.017927	0.916816	0.735716	-0.0243607	0.0195536	0.0243668	0.954553	-0.0187747	0.793273	0.33916	0.768322	FALSE
NFKB1 hotspot S337 // NFKB1 p.R334Q // NFKB1 p.R335Q // NFKB1 p.334 // NFKB1 p.335	3	7096	0.0479039	0.00912631	0.0387776	1.13241	0.753031	0.0514862	0.0342434	0.0514954	0.95462	0.0247405	0.428142	0.00160388	0.768322	FALSE
AHR truncating	8	7076	0.0344565	0.0154331	0.0190234	0.901636	0.759348	0.0250472	0.0210987	0.0250522	0.955505	0.0149807	0.00150583	0.167647	0.768368	FALSE
SMAD4 p.383	3	6912	0.0233223	0.0115843	0.0117381	1.22123	0.747385	0.0157017	0.00961165	0.0157055	0.957543	0.0229558	0.000126445	0.0513206	0.768778	FALSE
TP53 p.H179Y	12	4377	0.117567	0.105233	0.0123337	0.60902	0.735716	0.0167708	0.0202517	0.0167642	0.957671	0.0112884	0.757071	0.333711	0.768778	FALSE
ESR1 interface NCOA5	3	7072	0.0533213	0.0227464	0.0305749	0.875417	0.745607	0.0410046	0.0349261	0.0410068	0.958591	0.0223644	0.42829	0.0647321	0.768851	FALSE
PBX1 interface HOXB7 // PBX1 interface HOXB1 // PBX1 interface TLX1 // PBX1 interface PKNOX1	3	7096	-0.0198914	0.00731086	-0.0272023	0.140867	0.660515	-0.041189	0.193106	0.0411835	0.959704	-0.0192556	0.0107591	0.00762895	0.768994	FALSE
GATA3 p.A395T // GATA3 p.395	3	6972	0.0342062	0.0233682	0.010838	0.332409	0.702129	0.0154377	0.0326045	0.0154359	0.960427	0.0201119	0.170992	0.0501831	0.768994	FALSE
MAX p.R60Q // MAX p.60	7	7127	-0.0046958	0.00446329	-0.00915909	0.491101	0.773813	-0.0118393	0.0186501	0.0118363	0.96354	0.0133645	0.299059	0.000318316	0.770406	FALSE
RELA truncating	15	7103	-0.0159815	0.00594616	-0.0219277	0.654485	0.709003	-0.030932	0.0335037	0.0309275	0.964292	-0.00820265	0.288921	0.00166856	0.770406	FALSE
TP53 p.V274D	3	4377	0.126986	0.105233	0.0217522	1.09178	0.735716	0.0295579	0.0199236	0.029566	0.964802	0.0187608	0.800581	0.344606	0.770406	FALSE
STAT3 interface STAT1	6	7070	0.0274567	0.00858331	0.0188734	1.23334	0.722323	0.026111	0.0153026	0.0261287	0.96551	0.012762	0.473279	0.0185603	0.770406	FALSE
NFKB1 missense	57	7096	0.00786029	0.00912631	-0.00126602	0.658404	0.753031	-0.00168278	0.00192286	0.00168123	0.966615	-0.00418514	0.465735	0.00099781	0.770624	FALSE
TP53 p.H179Q	3	4377	0.119444	0.105233	0.0142108	0.948847	0.735716	0.0193127	0.0149769	0.0193156	0.967894	0.0171087	0.774953	0.33173	0.770648	FALSE
SMAD4 hotspot S138	13	6912	-0.017132	0.0115843	-0.0287163	0.718743	0.747385	-0.0384248	0.0399535	0.0384223	0.968306	-0.00823749	0.000116152	0.0578278	0.770648	FALSE
TCF3 p.G431S // TCF3 p.431	3	7120	0.0556456	0.0163394	0.0393061	0.686301	0.846207	0.0464521	0.0572724	0.0464498	0.972161	0.0170501	0.0100016	0.231525	0.771517	FALSE
ESR1 p.E247K // ESR1 p.247	3	7072	0.0124233	0.0227464	-0.010323	0.64514	0.745607	-0.0138456	0.0160012	0.0138451	0.972732	-0.0147158	0.450352	0.0657232	0.771517	FALSE
PAX5 p.V26G // PAX5 p.26	3	7103	0.00768526	0.0178502	-0.0101649	0.660396	0.825094	-0.0123203	0.0153922	0.0123197	0.973142	0.0160402	0.0600395	0.0840445	0.771517	FALSE
EZH2 p.Q62R	3	7038	-0.026116	-0.000757567	-0.0253585	1.34098	0.81527	-0.0310969	0.0189104	0.0311044	0.97328	-0.015775	0.135959	0.82597	0.771517	FALSE
RXRA interface NR1I2 // RXRA 3D hotspot 227-457-4j5w // RXRA 3D hotspot 227-461-4j5w // RXRA 3D hotspot 227-462-1xvp // RXRA 3D hotspot 228-458-4j5x	11	7108	0.00152259	-0.00480923	0.00633182	0.736079	0.656272	0.00964642	0.0086021	0.00964817	0.973554	0.00657227	0.52713	0.181634	0.771517	FALSE
PPARG truncating	9	7105	0.00552083	0.0141343	-0.00861342	0.817656	0.750058	-0.0114825	0.0105343	0.0114837	0.975436	-0.0077059	0.410805	0.207021	0.77153	FALSE
PPARD interface PPARD	16	7115	-0.00052037	-0.00332431	0.00280394	0.59978	0.68935	0.00406856	0.00467495	0.00406752	0.975925	-0.00519981	0.0829324	3.16663e-05	0.77153	FALSE
JUN truncating	10	7136	0.0207586	0.0100923	0.0106664	0.874814	0.717228	0.0148671	0.0121927	0.0148716	0.976065	0.0068145	0.305701	0.021058	0.77153	FALSE
FOXA1 p.253	3	7067	0.0343357	0.0285778	0.00575789	1.2967	0.748536	0.00769002	0.00444041	0.0076922	0.979183	0.0112776	0.00927461	0.214741	0.773336	FALSE
CLOCK missense	42	7079	-0.0065751	-0.00896118	0.00238608	0.581153	0.731236	0.00326654	0.00410577	0.00326308	0.981634	0.00260263	0.116989	0.394	0.773934	FALSE
NFKB1 interface NFKB1 // NFKB1 interface IRF3 // NFKB1 interface IRF7	3	7096	0.00262119	0.00912631	-0.00650513	0.591088	0.753031	-0.00863906	0.0110054	0.00863859	0.983262	-0.00911917	0.454031	0.00194429	0.773934	FALSE
EZH2 p.R207Q	7	7038	0.00207344	-0.000757567	0.00283101	0.721765	0.81527	0.0034728	0.00392234	0.00347248	0.983415	0.00640931	0.141767	0.782091	0.773934	FALSE
NR3C1 missense	62	7087	0.0100891	0.0148519	-0.00476282	0.830407	0.797802	-0.00596781	0.00573553	0.00596993	0.984336	-0.00199892	0.110113	0.503898	0.773934	FALSE
STAT1 interface STAT5A	6	7068	-0.00739246	0.0134036	-0.0207961	0.6164	0.798822	-0.0260372	0.033738	0.0260334	0.984989	-0.00613447	0.819597	0.000228538	0.773934	FALSE
RARA interface RARA	6	7116	-0.00255	-0.00846123	0.00591123	0.800176	0.781459	0.00756423	0.00738742	0.00756436	0.98616	0.00553693	0.425233	0.420003	0.773934	FALSE
ESR1 inframe indel	3	7072	0.0417236	0.0227464	0.0189772	0.428078	0.745607	0.0254544	0.0443312	0.025452	0.986611	0.00722609	0.438751	0.0645852	0.773934	FALSE
JUND missense	15	7145	-0.000556775	0.00446347	-0.00502025	0.763625	0.602874	-0.00832227	0.00657423	0.00832719	0.988384	0.00226954	0.0435249	0.0591618	0.773934	FALSE
HLF p.258	3	7120	0.0422755	0.0168518	0.0254238	0.480368	0.79083	0.0321511	0.0529256	0.0321482	0.988541	0.00655798	0.0227983	0.452248	0.773934	FALSE
TP53 p.R110fs	4	4377	0.095975	0.105233	-0.00925839	0.515048	0.735716	-0.0125864	0.0179758	0.0125842	0.988976	-0.00508535	0.77285	0.319149	0.773934	FALSE
TP53 p.V218G	3	4377	0.103768	0.105233	-0.0014653	0.0835908	0.735716	-0.00199212	0.0175295	0.00199167	0.989619	-0.00552829	0.782847	0.321158	0.773934	FALSE
CLOCK interface ARNTL2	10	7079	-0.0242564	-0.00896118	-0.0152952	0.544386	0.731236	-0.0209229	0.0280963	0.0209169	0.989948	-0.00291583	0.106383	0.442378	0.773934	FALSE
HSF1 truncating	6	7120	0.0150713	0.0122887	0.00278259	0.953366	0.695998	0.00399675	0.0029187	0.00399798	0.991768	-0.00293433	0.581483	0.294374	0.774704	FALSE
TP63 truncating	18	6997	0.0104533	0.0104275	2.57971e-05	0.641076	0.678513	3.80249e-05	4.02403e-05	3.802e-05	0.993769	0.00125059	0.717214	0.170489	0.775614	FALSE
EZH2 p.62	4	7038	-0.0103413	-0.000757567	-0.00958376	1.09536	0.81527	-0.0117533	0.00874943	0.0117553	0.994743	-0.00268738	0.135853	0.825355	0.775722	FALSE
TP53 p.R273P	5	4377	0.107913	0.105233	0.00267942	1.19253	0.735716	0.00363922	0.00224684	0.00364192	0.999352	0.00026779	0.748958	0.356841	0.778662	FALSE

## Sheet: table S4E
Table S4E. Full list of ANOVA pan-cancer interactions between TF mutation classes and their corresponding activity in cell lines
Mutation_group	POS	NEG	POS_Y_MEAN	NEG_Y_MEAN	deltaMEAN_Y	POS_Y_sd	NEG_Y_sd	X_effect_size	X_ANOVA_coef	POS_Glass_delta	NEG_Glass_delta	X_ANOVA_pval	MSI_ANOVA_pval	Screen_Medium_PVAL	X_ANOVA_fdr	is_significant
TP53 missense	440	353	-0.211577	0.35952	-0.571097	0.712234	0.791783	-0.762807	-0.570716	0.801839	0.72128	9.73023e-25	0.392812	0.962928	3.21098e-22	TRUE
TP53 truncating	160	353	-0.237657	0.35952	-0.597177	0.681366	0.791783	-0.78664	-0.595513	0.876441	0.754218	3.4946e-15	0.601634	0.89865	5.76609e-13	TRUE
TP53 3D hotspot 97-287-1ycs	151	353	-0.234767	0.35952	-0.594287	0.739139	0.791783	-0.765413	-0.590754	0.804026	0.750569	5.59577e-14	0.876299	0.567217	6.15535e-12	TRUE
TP53 interface TP53BP2	151	353	-0.228834	0.35952	-0.588354	0.743165	0.791783	-0.756654	-0.584303	0.791687	0.743076	1.195e-13	0.939426	0.694184	8.46705e-12	TRUE
TP53 interface PPP1R13L	158	353	-0.215905	0.35952	-0.575425	0.732608	0.791783	-0.743431	-0.572119	0.785448	0.726747	1.28289e-13	0.970311	0.711163	8.46705e-12	TRUE
TP53 3D hotspot 97-291-4a63	133	353	-0.251324	0.35952	-0.610844	0.75697	0.791783	-0.78069	-0.606684	0.80696	0.77148	2.92295e-13	0.9759	0.724163	1.53521e-11	TRUE
TP53 interface BCL2	120	353	-0.256705	0.35952	-0.616225	0.691371	0.791783	-0.802737	-0.613992	0.891309	0.778275	3.6698e-13	0.982793	0.753709	1.53521e-11	TRUE
TP53 3D hotspot 96-290-2mej	119	353	-0.258998	0.35952	-0.618519	0.693835	0.791783	-0.804979	-0.616319	0.891448	0.781172	3.72172e-13	0.982252	0.753943	1.53521e-11	TRUE
TP53 interface BCL2L1	117	353	-0.246958	0.35952	-0.606478	0.694123	0.791783	-0.788931	-0.603969	0.873733	0.765965	1.43469e-12	0.98451	0.744655	5.26054e-11	TRUE
TP53 3D hotspot 96-288-2mej	139	353	-0.194481	0.35952	-0.554002	0.692912	0.791783	-0.723967	-0.551087	0.799527	0.699689	3.98432e-12	0.949626	0.960799	1.31482e-10	TRUE
TP53 interface TP53BP1 // TP53 3D hotspot 95-289-1kzy // TP53 3D hotspot 95-292-1gzh	106	353	-0.255591	0.35952	-0.615111	0.707396	0.791783	-0.79553	-0.612991	0.869542	0.776869	6.3261e-12	0.984334	0.777292	1.89783e-10	TRUE
TP53 3D hotspot 95-290-1gzh	109	353	-0.245016	0.35952	-0.604537	0.713402	0.791783	-0.780961	-0.602551	0.8474	0.763513	8.02363e-12	0.982711	0.774728	2.2065e-10	TRUE
TP53 interface TP53	135	353	-0.137226	0.35952	-0.496746	0.649096	0.791783	-0.657821	-0.497287	0.765289	0.627376	2.45847e-10	0.562883	0.998256	6.24073e-09	TRUE
TP53 p.248	62	353	-0.347898	0.35952	-0.707418	0.731633	0.791783	-0.903253	-0.703822	0.966903	0.89345	3.62328e-10	0.952553	0.783616	8.54059e-09	TRUE
TP53 hotspot S269	79	353	-0.211681	0.35952	-0.571201	0.722996	0.791783	-0.732539	-0.570848	0.790048	0.721412	1.13094e-08	0.886252	0.517563	2.48806e-07	TRUE
TP53 p.R248Q	38	353	-0.335022	0.35952	-0.694542	0.764734	0.791783	-0.880003	-0.690685	0.908215	0.877188	6.61861e-07	0.970596	0.697868	1.36509e-05	TRUE
TP53 Stability uniprot = D	68	353	-0.160732	0.35952	-0.520253	0.751331	0.791783	-0.662359	-0.525124	0.692442	0.657065	8.5945e-07	0.936171	0.703724	1.66834e-05	TRUE
TP53 hotspot S215	32	353	-0.347929	0.35952	-0.707449	0.635739	0.791783	-0.906621	-0.699432	1.1128	0.893489	2.88266e-06	0.919771	0.723333	5.28488e-05	TRUE
TP53 p.273	52	353	-0.200573	0.35952	-0.560093	0.755512	0.791783	-0.711424	-0.55164	0.741343	0.707383	4.83269e-06	0.865081	0.520103	8.39362e-05	TRUE
TP53 p.245	22	353	-0.338748	0.35952	-0.698269	0.800657	0.791783	-0.881335	-0.701412	0.87212	0.881894	8.43204e-05	0.970316	0.666974	0.00139129	TRUE
TP53 hotspot T284	34	353	-0.197991	0.35952	-0.557512	0.71349	0.791783	-0.709864	-0.559261	0.781386	0.704122	9.80296e-05	0.969234	0.700217	0.00154047	TRUE
TP53 interaction decreasing KMT2E // TP53 interaction disrupting DAXX // TP53 p.R248W	21	353	-0.374068	0.35952	-0.733588	0.723703	0.791783	-0.930628	-0.715385	1.01366	0.926502	0.000108219	0.785248	0.793165	0.00162328	TRUE
TP53 DNA interactionloss // TP53 interaction decreasing SAFB // TP53 interaction decreasing PIAS4 // TP53 interaction increasing B2R5M9 // TP53 interaction increasing B2R6D7 // TP53 interaction increasing B4DVN3 // TP53 interaction increasing NRDC // TP53 interaction increasing KDM1A // TP53 interaction increasing OBSL1 // TP53 interaction increasing MPDZ // TP53 interaction increasing HERC2 // T…	27	353	-0.219089	0.35952	-0.57861	0.673836	0.791783	-0.737798	-0.579459	0.858681	0.730768	0.000285691	0.940558	0.649849	0.00409904	TRUE
TP53 p.220	16	353	-0.41188	0.35952	-0.7714	0.798286	0.791783	-0.973929	-0.752045	0.966321	0.974257	0.000334598	0.740979	0.765065	0.00460073	TRUE
TP53 hotspot T211	18	353	-0.296099	0.35952	-0.655619	0.47575	0.791783	-0.840492	-0.660518	1.37808	0.828029	0.000586529	0.969749	0.698743	0.00774219	TRUE
TP53 p.R273C	18	353	-0.316923	0.35952	-0.676444	0.859694	0.791783	-0.850831	-0.685679	0.786842	0.85433	0.00062641	0.841525	0.587704	0.00795059	TRUE
TP53 interface TP63	26	353	-0.165743	0.35952	-0.525263	0.469348	0.791783	-0.678138	-0.526707	1.11913	0.663393	0.00100619	0.990853	0.730634	0.0122978	TRUE
TP53 hotspot T155	35	353	-0.122724	0.35952	-0.482244	0.733541	0.791783	-0.612899	-0.464716	0.65742	0.609062	0.0011628	0.961228	0.74387	0.0137044	TRUE
TP53 p.193	7	353	-0.622664	0.35952	-0.982184	1.01562	0.791783	-1.23382	-0.993719	0.967078	1.24047	0.00130264	0.946103	0.715029	0.0148231	TRUE
TP53 p.G245S	17	353	-0.274586	0.35952	-0.634106	0.893128	0.791783	-0.796158	-0.643222	0.709983	0.800858	0.00148729	0.963515	0.73152	0.0163602	TRUE
TP53 p.Y220C	14	353	-0.359315	0.35952	-0.718835	0.781374	0.791783	-0.908292	-0.693127	0.919963	0.907869	0.0019194	0.766828	0.738414	0.0204324	TRUE
TP53 hotspot S183	22	353	-0.161382	0.35952	-0.520903	0.422175	0.791783	-0.671555	-0.529474	1.23386	0.657886	0.00218898	0.96008	0.709784	0.0225738	TRUE
REST truncating	6	930	0.729983	-0.00466452	0.734648	0.785726	0.628428	1.16727	0.757836	0.934993	1.16902	0.00366921	0.257926	0.902211	0.0366921	TRUE
TP53 interaction disrupting NRDC	19	353	-0.191877	0.35952	-0.551397	0.997552	0.791783	-0.686659	-0.552202	0.55275	0.696399	0.0049291	0.885462	0.556856	0.0476276	TRUE
TP53 p.173	3	353	-1.01132	0.35952	-1.37084	0.387095	0.791783	-1.73507	-1.44761	3.54136	1.73134	0.00505141	0.918421	0.708319	0.0476276	TRUE
TP53 interaction disrupting BCL2L1	27	353	-0.0721487	0.35952	-0.431669	0.770011	0.791783	-0.546206	-0.440633	0.560601	0.545186	0.00588423	0.978141	0.713868	0.0539388	FALSE
TP53 hotspot S149	16	353	-0.235887	0.35952	-0.595407	0.578618	0.791783	-0.759248	-0.5594	1.02902	0.751983	0.00705738	0.96354	0.77409	0.0629442	FALSE
TP53 p.161	4	353	-0.684648	0.35952	-1.04417	0.715759	0.791783	-1.31978	-1.09981	1.45883	1.31876	0.00741814	0.807778	0.684022	0.0644207	FALSE
TP53 interaction ZNF385A loss	28	353	-0.0492543	0.35952	-0.408775	0.732483	0.791783	-0.518943	-0.418291	0.558067	0.516271	0.00764229	0.978262	0.708227	0.0646655	FALSE
NFE2L2 p.29	3	945	0.95348	-0.00327643	0.956756	0.142996	0.650216	1.47293	0.947244	6.69078	1.47144	0.0120304	0.473147	0.750867	0.0992505	FALSE
TP53 p.E285K	4	353	-0.641661	0.35952	-1.00118	0.261577	0.791783	-1.26925	-1.00134	3.82748	1.26446	0.0126312	0.945829	0.717296	0.101666	FALSE
TP53 p.147	3	353	-0.78812	0.35952	-1.14764	1.03128	0.791783	-1.4466	-1.15638	1.11283	1.44944	0.0129719	0.94639	0.721208	0.101912	FALSE
TP53 interaction increasing VRK1 // TP53 p.R175H	26	353	-0.0336821	0.35952	-0.393202	0.758343	0.791783	-0.497971	-0.40224	0.518502	0.496604	0.0132795	0.978534	0.707836	0.101912	FALSE
TP53 p.282	8	353	-0.315175	0.35952	-0.674695	0.642421	0.791783	-0.854975	-0.684949	1.05024	0.852122	0.0164913	0.944488	0.696082	0.123685	FALSE
ESR2 truncating	3	950	0.899283	-0.00309991	0.902383	0.670474	0.663972	1.35904	0.897649	1.34589	1.35907	0.0196439	0.459356	0.381692	0.140049	FALSE
TP53 p.G266V	3	353	-0.708713	0.35952	-1.06823	0.549848	0.791783	-1.35113	-1.08562	1.94278	1.34915	0.0197125	0.945745	0.715169	0.140049	FALSE
TP53 p.266	3	353	-0.708713	0.35952	-1.06823	0.549848	0.791783	-1.35113	-1.08562	1.94278	1.34915	0.0197125	0.945745	0.715169	0.140049	FALSE
TP53 hotspot T150	23	353	-0.0797195	0.35952	-0.43924	0.710362	0.791783	-0.557959	-0.408675	0.618332	0.554748	0.0199464	0.964158	0.704274	0.140049	FALSE
RARA missense	13	963	0.534061	-0.000681713	0.534743	1.22791	0.900098	0.590968	0.583538	0.435489	0.594094	0.020612	0.0108913	0.0576362	0.141708	FALSE
TP53 p.H193R	4	353	-0.570076	0.35952	-0.929596	1.3439	0.791783	-1.16483	-0.935186	0.691715	1.17405	0.0211078	0.946249	0.715185	0.142155	FALSE
TP53 p.175	29	353	0.00946027	0.35952	-0.35006	0.81688	0.791783	-0.441071	-0.355449	0.428533	0.442116	0.0228679	0.947725	0.988337	0.148446	FALSE
TP53 p.241	5	353	-0.482228	0.35952	-0.841748	0.529126	0.791783	-1.06643	-0.842927	1.59083	1.0631	0.0231892	0.943758	0.718877	0.148446	FALSE
TP53 p.R248L	3	353	-0.674764	0.35952	-1.03428	0.361293	0.791783	-1.3092	-1.05167	2.86273	1.30627	0.0237498	0.945663	0.714563	0.148446	FALSE
TFAP2C missense	13	971	-0.468729	0.00386631	-0.472595	0.664564	0.600196	-0.786316	-0.389573	0.711135	0.787401	0.0238485	0.057423	0.14259	0.148446	FALSE
TP53 p.179	10	353	-0.206194	0.35952	-0.565714	0.546342	0.791783	-0.719193	-0.574262	1.03546	0.714481	0.0242912	0.969769	0.718977	0.148446	FALSE
TP53 p.176	9	353	-0.232461	0.35952	-0.591981	0.265833	0.791783	-0.755138	-0.598562	2.22689	0.747656	0.0253135	0.944961	0.709817	0.151429	FALSE
TP53 p.132	11	353	-0.178754	0.35952	-0.538274	0.795198	0.791783	-0.679744	-0.545114	0.676906	0.679825	0.0262328	0.945505	0.710053	0.151429	FALSE
NFE2L2 missense	26	945	0.274333	-0.00327643	0.277609	0.643855	0.650216	0.427056	0.288025	0.431167	0.426949	0.0265956	0.514138	0.629976	0.151429	FALSE
TP53 p.159	3	353	-0.657154	0.35952	-1.01667	1.0981	0.791783	-1.2807	-1.03406	0.92585	1.28403	0.0269096	0.946175	0.718321	0.151429	FALSE
TP53 p.285	5	353	-0.436107	0.35952	-0.795627	0.512425	0.791783	-1.00815	-0.795403	1.55267	1.00486	0.0270737	0.946099	0.71998	0.151429	FALSE
TP53 PTM ubiquitination loss	14	353	-0.105285	0.35952	-0.464805	0.739324	0.791783	-0.58838	-0.470287	0.628689	0.587036	0.0307677	0.945407	0.71049	0.167982	FALSE
TP53 p.275	3	353	-0.636835	0.35952	-0.996355	0.523012	0.791783	-1.26038	-0.998561	1.90503	1.25837	0.0310513	0.946308	0.721588	0.167982	FALSE
ARNTL missense	9	963	-0.605598	-0.00650035	-0.599098	0.862848	0.917485	-0.65329	-0.660872	0.694326	0.652978	0.0326454	0.181991	0.168237	0.173758	FALSE
TP53 p.K132N	3	353	-0.619693	0.35952	-0.979213	0.972894	0.791783	-1.23494	-0.988512	1.0065	1.23672	0.0333736	0.94609	0.717804	0.174814	FALSE
TP53 p.110	5	353	-0.398035	0.35952	-0.757555	1.03614	0.791783	-0.952965	-0.767756	0.731129	0.956772	0.0343514	0.946947	0.726371	0.177125	FALSE
TP53 p.R282W	6	353	-0.31849	0.35952	-0.67801	0.715885	0.791783	-0.857405	-0.690754	0.947095	0.856309	0.0359192	0.94426	0.688597	0.182359	FALSE
TP53 p.G245V	4	353	-0.515591	0.35952	-0.875111	0.345042	0.791783	-1.10904	-0.848879	2.53624	1.10524	0.0380581	0.941799	0.669372	0.190291	FALSE
TP53 p.P152L	4	353	-0.457689	0.35952	-0.81721	0.201627	0.791783	-1.03622	-0.822559	4.05308	1.03211	0.0399609	0.945562	0.714145	0.196823	FALSE
TP53 p.152	4	353	-0.457689	0.35952	-0.81721	0.201627	0.791783	-1.03622	-0.822559	4.05308	1.03211	0.0399609	0.945562	0.714145	0.196823	FALSE
TP53 p.213	6	353	-0.304468	0.35952	-0.663989	0.498643	0.791783	-0.842166	-0.678624	1.33159	0.8386	0.0406957	0.974989	0.710099	0.197494	FALSE
STAT6 missense	18	947	0.286199	-0.00296946	0.289168	0.819645	0.760358	0.379763	0.371443	0.352797	0.380306	0.0438287	0.0725221	0.617019	0.209616	FALSE
SMAD4 3D hotspot 314-546-1u7f // SMAD4 3D hotspot 314-549-1u7v	11	934	-0.366908	0.00966651	-0.376574	0.566323	0.609714	-0.618074	-0.373412	0.664946	0.617624	0.0445394	0.798993	0.912245	0.209971	FALSE
SMAD4 interface SMAD1	11	934	-0.366908	0.00966651	-0.376574	0.566323	0.609714	-0.618074	-0.373412	0.664946	0.617624	0.0445394	0.798993	0.912245	0.209971	FALSE
SMAD4 interface SMAD2	11	934	-0.366908	0.00966651	-0.376574	0.566323	0.609714	-0.618074	-0.373412	0.664946	0.617624	0.0445394	0.798993	0.912245	0.209971	FALSE
SMAD4 interface SMAD9 // SMAD4 interface SMAD3 // SMAD4 interface SMAD5	11	934	-0.366908	0.00966651	-0.376574	0.566323	0.609714	-0.618074	-0.373412	0.664946	0.617624	0.0445394	0.798993	0.912245	0.209971	FALSE
SMAD4 interface SMAD4	11	934	-0.361477	0.00966651	-0.371143	0.577545	0.609714	-0.609049	-0.367951	0.642622	0.608717	0.0477825	0.799244	0.9124	0.222088	FALSE
ZNF423 missense	65	879	0.165415	-0.00927663	0.174692	0.731512	0.69539	0.250309	0.178005	0.238809	0.251214	0.0536251	0.692664	0.848959	0.243857	FALSE
CTCF truncating	23	938	0.510212	-0.00729737	0.517509	0.788859	0.789883	0.655191	0.378554	0.656022	0.655172	0.0539442	0.496092	0.423703	0.243857	FALSE
TP53 p.278	5	353	-0.319963	0.35952	-0.679483	0.450359	0.791783	-0.861449	-0.688255	1.50876	0.858169	0.0554244	0.968317	0.708583	0.247163	FALSE
TP53 p.267	5	353	-0.324085	0.35952	-0.683605	0.916517	0.791783	-0.861731	-0.681228	0.745873	0.863375	0.0593971	0.945905	0.714952	0.258922	FALSE
TP53 p.135	8	353	-0.170417	0.35952	-0.529937	0.380564	0.791783	-0.674371	-0.532954	1.3925	0.669296	0.0603957	0.94575	0.717605	0.258922	FALSE
TP53 p.143	4	353	-0.400353	0.35952	-0.759873	0.23568	0.791783	-0.963416	-0.753259	3.22417	0.959699	0.0611144	0.945488	0.713283	0.258922	FALSE
REL missense	10	970	-0.529577	0.00598019	-0.535557	0.807538	0.830959	-0.644671	-0.491819	0.663198	0.644506	0.062481	0.0168603	0.225899	0.258922	FALSE
TP53 p.K132R	3	353	-0.492754	0.35952	-0.852275	0.359721	0.791783	-1.07882	-0.861269	2.36927	1.0764	0.062606	0.945835	0.716644	0.258922	FALSE
TCF12 missense	19	959	-0.291933	0.00302091	-0.294954	0.665667	0.77252	-0.382717	-0.336924	0.443096	0.381808	0.0627689	0.43904	0.301321	0.258922	FALSE
NFE2L2 interface NFE2L2	3	945	0.704148	-0.00327643	0.707425	0.828747	0.650216	1.08727	0.697919	0.853607	1.08798	0.0645168	0.474313	0.752245	0.262846	FALSE
TP53 p.V216M	3	353	-0.473256	0.35952	-0.832776	0.389886	0.791783	-1.05403	-0.842976	2.13595	1.05177	0.0696519	0.967311	0.707636	0.280306	FALSE
TP53 p.216	3	353	-0.473256	0.35952	-0.832776	0.389886	0.791783	-1.05403	-0.842976	2.13595	1.05177	0.0696519	0.967311	0.707636	0.280306	FALSE
IRF1 missense	12	969	-0.453165	0.0105189	-0.463684	0.905015	0.772929	-0.598658	-0.408245	0.512349	0.599904	0.0709531	0.015821	0.784553	0.282103	FALSE
ZNF423 truncating	5	879	0.553269	-0.00927663	0.562546	0.324637	0.69539	0.810403	0.562983	1.73285	0.808965	0.0777337	0.727063	0.923079	0.304026	FALSE
TP53 p.246	4	353	-0.334593	0.35952	-0.694114	0.420577	0.791783	-0.879318	-0.707847	1.65039	0.876647	0.0783096	0.927546	0.71954	0.304026	FALSE
RREB1 p.M638T // RREB1 p.638	3	901	0.947421	-0.00609807	0.953519	0.400889	0.875949	1.08951	0.882304	2.37851	1.08856	0.0811052	0.2554	0.0266764	0.307974	FALSE
TP53 p.P59fs	4	353	-0.323795	0.35952	-0.683315	0.50346	0.791783	-0.865189	-0.699724	1.35724	0.863009	0.0816709	0.946753	0.713851	0.307974	FALSE
TP53 p.237	7	353	-0.1563	0.35952	-0.51582	0.457382	0.791783	-0.655135	-0.52857	1.12777	0.651467	0.0821265	0.944488	0.698979	0.307974	FALSE
TP53 hotspot S106	9	353	-0.0947318	0.35952	-0.454252	0.969466	0.791783	-0.570552	-0.458752	0.468559	0.573708	0.0915483	0.948571	0.734563	0.339449	FALSE
ZNF263 truncating	4	965	0.712051	-0.0116857	0.723737	0.351054	0.788395	0.919132	0.678642	2.06161	0.917988	0.0928289	0.78208	0.90173	0.340373	FALSE
TP53 p.R213Q	5	353	-0.23605	0.35952	-0.59557	0.525069	0.791783	-0.754568	-0.607246	1.13427	0.752189	0.0948242	0.976259	0.70853	0.343868	FALSE
USF2 missense	3	977	-1.00848	-0.0125172	-0.995967	0.885982	0.8897	-1.11945	-0.859729	1.12414	1.11944	0.0976027	0.0131312	0.52897	0.350097	FALSE
SMAD3 p.S266L // SMAD3 p.266	3	970	-0.703158	0.0103001	-0.713458	0.712086	0.740286	-0.963834	-0.705607	1.00193	0.96376	0.100574	0.182918	0.394638	0.356876	FALSE
NFE2L2 3D hotspot 69-84-2flu	9	945	0.361059	-0.00327643	0.364335	0.764009	0.650216	0.559436	0.355882	0.476873	0.56033	0.103886	0.479863	0.742837	0.361616	FALSE
TP53 p.R110L	3	353	-0.383317	0.35952	-0.742837	1.3334	0.791783	-0.933355	-0.760222	0.557098	0.938183	0.104101	0.946444	0.720292	0.361616	FALSE
TP53 p.C135F	5	353	-0.206219	0.35952	-0.565739	0.494346	0.791783	-0.716975	-0.57271	1.14442	0.714513	0.110315	0.946065	0.719656	0.379207	FALSE
TP53 p.P151fs // TP53 p.P19fs	4	353	-0.2748	0.35952	-0.63432	0.597109	0.791783	-0.802593	-0.635263	1.06232	0.801129	0.113355	0.946368	0.722215	0.38564	FALSE
TP53 p.P58fs	4	353	-0.2748	0.35952	-0.63432	0.597109	0.791783	-0.802593	-0.635263	1.06232	0.801129	0.113355	0.946368	0.722215	0.38564	FALSE
TP53 p.H179R	6	353	-0.151771	0.35952	-0.511291	0.661629	0.791783	-0.647115	-0.517902	0.772776	0.645746	0.115083	0.97119	0.716303	0.387523	FALSE
TP53 p.224	3	353	-0.363165	0.35952	-0.722685	0.674997	0.791783	-0.913437	-0.722949	1.07065	0.912731	0.118136	0.945025	0.703274	0.393786	FALSE
TP53 p.C176F	5	353	-0.190058	0.35952	-0.549578	0.29157	0.791783	-0.697498	-0.552509	1.88489	0.694102	0.122676	0.945297	0.711178	0.404832	FALSE
CDC5L missense	15	963	0.296571	-0.00581956	0.30239	0.690976	0.838239	0.361577	0.331733	0.437628	0.360745	0.130751	0.310533	0.273395	0.423618	FALSE
ATF1 missense	9	978	-0.444576	0.00705303	-0.451629	0.899422	0.806976	-0.559107	-0.411309	0.502133	0.559657	0.130936	0.615012	0.180446	0.423618	FALSE
SMAD4 p.361	4	934	-0.450404	0.00966651	-0.460071	0.348239	0.609714	-0.755384	-0.459747	1.32114	0.754568	0.136395	0.795286	0.909724	0.436995	FALSE
NFE2L2 interface KEAP1 // NFE2L2 3D hotspot 69-84-4ifl	10	945	0.307049	-0.00327643	0.310325	0.740286	0.650216	0.476599	0.301258	0.419196	0.477265	0.146856	0.478943	0.744905	0.459475	FALSE
TP53 p.262	4	353	-0.212155	0.35952	-0.571676	0.357653	0.791783	-0.724451	-0.576974	1.59841	0.722011	0.149246	0.945747	0.716119	0.459475	FALSE
SRF missense	8	970	0.244366	-0.00166233	0.246028	0.506027	0.769418	0.320412	0.402891	0.486195	0.319759	0.149614	0.0168076	0.579078	0.459475	FALSE
TP53 p.M237I	6	353	-0.100487	0.35952	-0.460007	0.474206	0.791783	-0.583604	-0.471468	0.970058	0.580977	0.15021	0.944487	0.697667	0.459475	FALSE
GLI2 missense	52	886	0.250221	-0.0160779	0.266299	0.83737	0.869693	0.30681	0.18138	0.318018	0.306199	0.150374	0.0108584	0.209024	0.459475	FALSE
RUNX2 truncating	3	960	-0.85283	-0.00493601	-0.847894	1.23026	0.717149	-1.17993	-0.608451	0.689201	1.18231	0.154342	0.0352166	0.978704	0.463357	FALSE
NRF1 missense	10	969	-0.403755	0.0124859	-0.416241	0.498824	0.862904	-0.483858	-0.39436	0.834445	0.482372	0.154452	0.209427	0.665064	0.463357	FALSE
ATF1 p.T146R // ATF1 p.146	5	978	-0.51718	0.00705303	-0.524233	1.10546	0.806976	-0.648469	-0.510593	0.474222	0.649626	0.159034	0.614332	0.189942	0.472805	FALSE
TP53 p.H179Q	3	353	-0.277494	0.35952	-0.637014	0.475361	0.791783	-0.805989	-0.645264	1.34007	0.804532	0.162754	0.946209	0.720662	0.479542	FALSE
MEF2A missense	3	977	-1.05698	0.00716425	-1.06414	0.543743	0.916674	-1.16164	-0.763278	1.95707	1.16087	0.164237	0.00560833	0.192876	0.47963	FALSE
TP53 p.R267P	3	353	-0.282404	0.35952	-0.641924	1.28639	0.791783	-0.807004	-0.643091	0.499013	0.810733	0.166682	0.946234	0.717673	0.482502	FALSE
TP53 p.158	10	353	0.00740758	0.35952	-0.352113	0.542045	0.791783	-0.447684	-0.349822	0.649601	0.444709	0.17079	0.945011	0.708435	0.485976	FALSE
NANOG missense	14	968	0.305111	-0.0148632	0.319974	0.673532	0.765034	0.418873	0.28331	0.475068	0.418248	0.171376	0.0439641	0.844364	0.485976	FALSE
TP53 p.255	3	353	-0.272209	0.35952	-0.63173	0.921085	0.791783	-0.797062	-0.63232	0.685854	0.797857	0.1723	0.945446	0.708656	0.485976	FALSE
NFKB1 interface NOTCH1	4	949	0.38293	0.0118273	0.371103	0.613275	0.756422	0.490868	0.515024	0.605117	0.490603	0.17538	0.000188847	0.723389	0.49047	FALSE
EZH2 p.685	3	939	0.681381	0.00174761	0.679634	1.2469	0.892821	0.760452	0.69401	0.54506	0.761221	0.17965	0.179626	0.525802	0.49455	FALSE
CDX2 truncating	5	976	-0.642149	0.003627	-0.645776	0.987668	0.692802	-0.930162	-0.427054	0.653839	0.932122	0.180501	0.00152796	0.792281	0.49455	FALSE
ESR1 truncating	3	962	-0.533787	0.00157536	-0.535362	0.849204	0.620272	-0.862326	-0.479735	0.630428	0.863108	0.181335	0.0284955	0.238242	0.49455	FALSE
FOXF2 missense	7	974	0.401187	-0.00187779	0.403065	0.76841	0.829214	0.486291	0.425269	0.524543	0.486081	0.185565	0.874945	0.964985	0.501939	FALSE
CTCF p.A201fs	11	938	0.506722	-0.00729737	0.514019	0.820379	0.789883	0.650484	0.36635	0.626563	0.650754	0.188157	0.626218	0.43339	0.502412	FALSE
STAT2 missense	13	960	-0.36649	0.0109808	-0.37747	0.595196	0.788497	-0.479999	-0.289728	0.634195	0.478722	0.189635	0.000965514	0.809664	0.502412	FALSE
MAX missense	7	982	0.404054	0.00186225	0.402192	0.5424	0.781039	0.515757	0.388923	0.741503	0.514944	0.190308	0.497666	0.709815	0.502412	FALSE
TP53 p.T152fs // TP53 p.T284fs	3	353	-0.246299	0.35952	-0.605819	1.25182	0.791783	-0.761912	-0.605232	0.483951	0.765133	0.192757	0.944957	0.695516	0.504839	FALSE
TP53 p.251	3	353	-0.222571	0.35952	-0.582091	0.888351	0.791783	-0.734629	-0.589255	0.655249	0.735165	0.203474	0.946949	0.726773	0.525364	FALSE
ARNTL truncating	9	963	-0.315567	-0.00650035	-0.309067	0.620604	0.917485	-0.337619	-0.403377	0.49801	0.336863	0.203777	0.453915	0.157787	0.525364	FALSE
EZH2 missense	25	939	-0.199565	0.00174761	-0.201312	1.01592	0.892821	-0.224655	-0.232033	0.198157	0.225479	0.205415	0.200823	0.548042	0.525479	FALSE
RARA truncating	5	963	0.265448	-0.000681713	0.266129	0.501658	0.900098	0.29609	0.519141	0.5305	0.295667	0.207372	0.00532015	0.0688146	0.526406	FALSE
E2F7 missense	28	936	-0.135292	0.0154057	-0.150697	0.748381	0.898221	-0.168498	-0.220262	0.201365	0.167773	0.209073	0.0695539	0.64109	0.526674	FALSE
TP53 p.242	8	353	0.0139607	0.35952	-0.34556	0.736796	0.791783	-0.437004	-0.351715	0.469003	0.436432	0.217197	0.943903	0.680196	0.542991	FALSE
EBF1 missense	26	945	0.164559	-0.00968017	0.174239	0.832571	0.727971	0.238404	0.17805	0.209279	0.239349	0.220685	0.0220266	0.634149	0.547565	FALSE
TP53 p.S241F	3	353	-0.263098	0.35952	-0.622619	0.338892	0.791783	-0.788171	-0.5952	1.83722	0.78635	0.223824	0.944989	0.719858	0.551209	FALSE
TP53 AURKB phosphorylation loss	6	353	-0.0300576	0.35952	-0.389578	0.351169	0.791783	-0.494818	-0.391341	1.10937	0.492026	0.231285	0.945561	0.714988	0.565363	FALSE
TP53 p.P72fs	4	353	-0.112972	0.35952	-0.472492	0.949089	0.791783	-0.595646	-0.49761	0.497838	0.596744	0.236181	0.953838	0.694259	0.573086	FALSE
TCF12 interface TAL1 // TCF12 interface ASCL4	3	959	-0.498754	0.00302091	-0.501775	0.348501	0.77252	-0.650069	-0.527872	1.43981	0.64953	0.238482	0.361824	0.386041	0.574446	FALSE
TCF12 interface TCF21 // TCF12 interface TAL2	3	959	-0.498754	0.00302091	-0.501775	0.348501	0.77252	-0.650069	-0.527872	1.43981	0.64953	0.238482	0.361824	0.386041	0.574446	FALSE
TP53 AURKA phosphorylation loss	5	353	-0.0557968	0.35952	-0.415317	0.38624	0.791783	-0.526794	-0.418445	1.07528	0.524534	0.242318	0.94565	0.715392	0.579455	FALSE
TP53 p.215	5	353	-0.0557968	0.35952	-0.415317	0.38624	0.791783	-0.526794	-0.418445	1.07528	0.524534	0.242318	0.94565	0.715392	0.579455	FALSE
SMAD4 missense	24	934	-0.13963	0.00966651	-0.149297	0.67273	0.609714	-0.244226	-0.147922	0.221926	0.244863	0.244873	0.789475	0.927924	0.581354	FALSE
TP53 inframe indel	17	353	0.109783	0.35952	-0.249737	0.804173	0.791783	-0.315195	-0.232237	0.310552	0.315412	0.246882	0.829601	0.618955	0.581935	FALSE
TFAP2A missense	10	962	-0.320996	0.00170546	-0.322701	0.763192	0.873345	-0.369906	-0.309365	0.422831	0.3695	0.267977	0.0176896	0.960363	0.618568	FALSE
ESR2 missense	19	950	-0.183629	-0.00309991	-0.180529	0.481197	0.663972	-0.273102	-0.171066	0.375167	0.271893	0.268915	0.442475	0.470792	0.618568	FALSE
FOXF2 p.132	3	974	0.523817	-0.00187779	0.525695	0.743125	0.829214	0.634096	0.533666	0.707412	0.633968	0.268943	0.837483	0.959762	0.618568	FALSE
TP53 p.P89fs	3	353	-0.135407	0.35952	-0.494927	0.436285	0.791783	-0.626312	-0.541915	1.13441	0.625079	0.269957	0.945946	0.717831	0.618568	FALSE
ELK4 missense	6	976	0.367397	0.00952076	0.357877	0.975495	0.880594	0.406169	0.397787	0.366867	0.406404	0.273025	0.454297	0.510057	0.618568	FALSE
TP53 p.259	3	353	-0.151061	0.35952	-0.510581	0.929998	0.791783	-0.644159	-0.511999	0.549013	0.64485	0.280657	0.96533	0.762371	0.618568	FALSE
TP53 hotspot S15	3	353	-0.13598	0.35952	-0.4955	0.277866	0.791783	-0.627359	-0.497073	1.78324	0.625803	0.281415	0.945769	0.715961	0.618568	FALSE
TP53 hotspot T18	3	353	-0.13598	0.35952	-0.4955	0.277866	0.791783	-0.627359	-0.497073	1.78324	0.625803	0.281415	0.945769	0.715961	0.618568	FALSE
TP53 hotspot S9	3	353	-0.13598	0.35952	-0.4955	0.277866	0.791783	-0.627359	-0.497073	1.78324	0.625803	0.281415	0.945769	0.715961	0.618568	FALSE
TP53 p.283	3	353	-0.126416	0.35952	-0.485936	0.434347	0.791783	-0.61494	-0.49874	1.11877	0.613724	0.28399	0.918889	0.71593	0.618568	FALSE
ELK4 truncating	4	976	-0.53087	0.00952076	-0.54039	1.15631	0.880594	-0.612986	-0.475862	0.467341	0.613666	0.285523	0.429041	0.510052	0.618568	FALSE
HNF1A missense	5	968	-0.370751	0.0067678	-0.377519	0.616403	0.795211	-0.475131	-0.378998	0.612454	0.474741	0.288039	0.637472	0.244427	0.618568	FALSE
PPARG interface PPARG	3	962	0.434489	0.00221719	0.432272	1.33083	0.80661	0.534956	0.500881	0.324813	0.535912	0.290276	0.548637	0.956465	0.618568	FALSE
ARNTL interface NPAS2	4	963	-0.418936	-0.00650035	-0.412436	0.740742	0.917485	-0.449772	-0.488002	0.556788	0.449529	0.29232	0.268391	0.161607	0.618568	FALSE
ARNTL interface HIF1A	4	963	-0.418936	-0.00650035	-0.412436	0.740742	0.917485	-0.449772	-0.488002	0.556788	0.449529	0.29232	0.268391	0.161607	0.618568	FALSE
TP53 p.P152fs // TP53 p.P20fs	3	353	-0.108617	0.35952	-0.468137	0.319995	0.791783	-0.592647	-0.488411	1.46295	0.591244	0.292629	0.959287	0.718483	0.618568	FALSE
NR3C1 missense	13	959	0.132997	0.0126996	0.120298	0.473416	0.606689	0.198767	0.179554	0.254106	0.198285	0.29568	0.0680858	0.513747	0.618568	FALSE
IRF2 missense	16	963	-0.152711	-0.0026539	-0.150057	0.673194	0.711895	-0.210957	-0.189579	0.222904	0.210786	0.299508	0.0457776	0.364317	0.618568	FALSE
TP53 p.Y163C	5	353	-0.0548367	0.35952	-0.414357	0.660478	0.791783	-0.524218	-0.376013	0.627359	0.523322	0.301461	0.940785	0.698413	0.618568	FALSE
TP53 p.163	5	353	-0.0548367	0.35952	-0.414357	0.660478	0.791783	-0.524218	-0.376013	0.627359	0.523322	0.301461	0.940785	0.698413	0.618568	FALSE
PAX6 truncating	12	953	-0.451842	0.016227	-0.468069	0.763625	0.80158	-0.584242	-0.256531	0.612957	0.583933	0.301988	0.0378785	0.811746	0.618568	FALSE
TP53 p.244	7	353	0.0297721	0.35952	-0.329748	0.295839	0.791783	-0.419499	-0.313707	1.11462	0.416463	0.303968	0.952803	0.724422	0.618568	FALSE
IKZF1 missense	22	948	0.153864	0.00597579	0.147888	0.583319	0.738282	0.201135	0.170184	0.253528	0.200314	0.306061	0.312537	0.635885	0.618568	FALSE
SMAD4 truncating	22	934	-0.121652	0.00966651	-0.131318	0.488909	0.609714	-0.216228	-0.134682	0.268595	0.215377	0.306883	0.793796	0.896497	0.618568	FALSE
MYB p.M416I // MYB p.416	3	964	0.447892	0.00200533	0.445887	1.12207	0.822203	0.541824	0.484148	0.39738	0.542308	0.309246	0.0763867	0.282257	0.618568	FALSE
PLAG1 missense	11	962	-0.263005	0.012649	-0.275654	0.970465	0.823319	-0.334139	-0.254917	0.284043	0.334808	0.309626	0.698655	0.035797	0.618568	FALSE
EGR1 missense	18	945	0.213791	-0.00332519	0.217117	0.928518	0.877454	0.247177	0.215961	0.233831	0.247439	0.311232	0.601949	0.557449	0.618568	FALSE
PAX6 p.P375fs // PAX6 p.P389fs	11	953	-0.487024	0.016227	-0.503251	0.790631	0.80158	-0.627912	-0.26364	0.636518	0.627824	0.311353	0.0407065	0.815199	0.618568	FALSE
GATA2 missense	8	969	-0.348584	0.00121285	-0.349797	0.786317	0.767025	-0.455961	-0.27575	0.444855	0.456044	0.311425	0.000926043	0.622007	0.618568	FALSE
SMAD3 missense	11	970	-0.240817	0.0103001	-0.251117	0.695295	0.740286	-0.339421	-0.227167	0.361166	0.339216	0.313895	0.164831	0.362169	0.618568	FALSE
TP53 p.280	5	353	-0.0043583	0.35952	-0.363879	1.497	0.791783	-0.453062	-0.366488	0.243072	0.459569	0.31469	0.946849	0.718998	0.618568	FALSE
STAT2 truncating	3	960	0.235574	0.0109808	0.224593	0.733142	0.788497	0.284877	0.461672	0.306343	0.284837	0.314908	0.00145565	0.850146	0.618568	FALSE
MYB missense	15	964	-0.253514	0.00200533	-0.25552	0.980142	0.822203	-0.309841	-0.213166	0.260696	0.310774	0.322994	0.0866149	0.292094	0.627995	FALSE
CLOCK interface ARNTL2	4	951	0.406195	-0.0139454	0.42014	1.6087	0.901663	0.464368	0.451465	0.261167	0.465961	0.323969	0.834968	0.35687	0.627995	FALSE
POU2F1 missense	16	945	-0.304329	0.00554014	-0.309869	0.968417	0.858325	-0.360248	-0.216373	0.319975	0.361016	0.325416	0.0110532	0.8655	0.627995	FALSE
NFE2L2 truncating	4	945	0.268891	-0.00327643	0.272168	0.699339	0.650216	0.418476	0.324811	0.389178	0.41858	0.329345	0.422583	0.747676	0.628862	FALSE
JUN truncating	3	982	-0.337172	0.0107932	-0.347966	0.40714	0.674535	-0.516194	-0.378414	0.854658	0.51586	0.329676	0.00142784	0.614432	0.628862	FALSE
PAX5 missense	10	971	0.137127	-0.00783781	0.144964	0.672212	0.789672	0.183808	0.244065	0.215653	0.183576	0.335813	0.0188506	0.247281	0.634039	FALSE
PPARA truncating	3	967	-0.439777	-0.00411712	-0.43566	0.668653	0.764854	-0.569738	-0.432188	0.65155	0.569599	0.336233	0.640359	0.803724	0.634039	FALSE
STAT6 p.P169fs // STAT6 p.P279fs	3	947	-0.704465	-0.00296946	-0.701495	0.529012	0.760358	-0.923088	-0.426136	1.32605	0.922585	0.346137	0.0477629	0.616815	0.649006	FALSE
TP53 interface EP300	4	353	-0.00129165	0.35952	-0.360812	0.583039	0.791783	-0.45658	-0.373286	0.618847	0.455696	0.351941	0.94535	0.709776	0.656162	FALSE
CREB1 truncating	3	978	-0.341665	0.0121124	-0.353777	0.608909	0.857416	-0.412817	-0.45946	0.581001	0.412608	0.355091	0.275392	0.282851	0.65692	FALSE
GATA3 missense	16	952	0.055749	-0.00605459	0.0618036	0.574543	0.590995	0.10462	0.139357	0.10757	0.104576	0.356329	0.0324497	0.178272	0.65692	FALSE
EZH2 p.Y641N	4	939	-0.400974	0.00174761	-0.402722	0.804196	0.892821	-0.451203	-0.396123	0.500776	0.451067	0.376909	0.17792	0.533683	0.691001	FALSE
LEF1 truncating	4	963	-0.30722	0.00198116	-0.309201	0.624579	0.662901	-0.466517	-0.287858	0.495054	0.466436	0.390356	0.343663	0.697937	0.711699	FALSE
SMAD4 p.355	3	934	-0.297364	0.00966651	-0.307031	0.332637	0.609714	-0.503944	-0.30118	0.92302	0.503565	0.3942	0.800112	0.905905	0.714757	FALSE
ARNT truncating	3	955	-0.45988	-0.00450414	-0.455375	0.56185	0.867028	-0.525533	-0.421952	0.810493	0.525214	0.401629	0.286809	0.804995	0.719787	FALSE
SREBF1 missense	15	966	0.300767	-0.0169491	0.317716	0.887727	0.920972	0.345154	0.208001	0.357898	0.344979	0.401726	0.537158	0.00869243	0.719787	FALSE
RXRA interface NR1H3	4	964	0.189079	-0.00553947	0.194619	0.938138	0.764804	0.25427	0.323003	0.207452	0.254469	0.403517	0.0310313	0.899877	0.719787	FALSE
RXRA interface NR1H2	4	964	0.189079	-0.00553947	0.194619	0.938138	0.764804	0.25427	0.323003	0.207452	0.254469	0.403517	0.0310313	0.899877	0.719787	FALSE
ESR1 missense	13	962	-0.188174	0.00157536	-0.18975	0.472896	0.620272	-0.306706	-0.140788	0.40125	0.305913	0.41751	0.02104	0.217379	0.740744	FALSE
PLAG1 truncating	3	962	-0.413098	0.012649	-0.425747	1.26605	0.823319	-0.516379	-0.380032	0.336279	0.51711	0.42584	0.685747	0.0363212	0.74647	FALSE
PPARA missense	8	967	-0.260961	-0.00411712	-0.256844	0.610181	0.764854	-0.336248	-0.219418	0.42093	0.335808	0.42668	0.690441	0.809907	0.74647	FALSE
MYCN missense	12	964	-0.110274	0.00712159	-0.117396	0.519959	0.795649	-0.148027	-0.18402	0.22578	0.147547	0.428901	0.26109	0.332524	0.74647	FALSE
KLF5 missense	11	974	-0.228539	-0.000331113	-0.228208	0.790912	0.905778	-0.252252	-0.217039	0.288538	0.251947	0.429786	0.210369	0.933411	0.74647	FALSE
FLI1 missense	15	960	-0.180157	3.44438e-06	-0.180161	0.591471	0.527477	-0.340922	-0.107323	0.304598	0.341552	0.438513	0.00134286	0.840115	0.752821	FALSE
CTCF missense	15	938	0.247063	-0.00729737	0.25436	0.971377	0.789883	0.320815	0.166622	0.261855	0.322023	0.439869	0.476906	0.436632	0.752821	FALSE
NFE2L2 inframe indel	3	945	0.295629	-0.00327643	0.298906	0.817981	0.650216	0.459419	0.29106	0.365419	0.459702	0.440286	0.475354	0.750811	0.752821	FALSE
PAX6 missense	12	953	-0.231031	0.016227	-0.247258	0.389521	0.80158	-0.309818	-0.179206	0.634774	0.308463	0.445433	0.0516909	0.812378	0.757696	FALSE
SP3 missense	24	952	-0.0512973	-0.00835612	-0.0429412	0.726737	0.882432	-0.0488483	0.139003	0.0590876	0.0486624	0.451374	1.52567e-05	0.811536	0.763863	FALSE
STAT3 missense	15	957	-0.267151	0.0119111	-0.279062	0.53829	0.710762	-0.393837	-0.138916	0.518423	0.392624	0.462241	0.00592707	0.721432	0.778263	FALSE
ETS1 missense	13	970	-0.110633	0.0125651	-0.123198	0.445574	0.749815	-0.164958	-0.154296	0.276492	0.164304	0.469876	0.320518	0.992327	0.787102	FALSE
ELF1 missense	13	973	0.10082	0.00345519	0.0973653	0.632232	0.742062	0.131429	0.151411	0.154002	0.131209	0.474131	0.364551	0.890744	0.788932	FALSE
CDX2 p.P260L // CDX2 p.260	4	976	0.194444	0.003627	0.190817	0.555363	0.692802	0.275579	0.247179	0.343589	0.275428	0.47575	0.00537205	0.818954	0.788932	FALSE
CDX2 missense	4	976	0.194444	0.003627	0.190817	0.555363	0.692802	0.275579	0.247179	0.343589	0.275428	0.47575	0.00537205	0.818954	0.788932	FALSE
RREB1 missense	38	901	-0.00325826	-0.00609807	0.00283981	0.806036	0.875949	0.00325184	-0.106177	0.00352318	0.00324198	0.486313	0.330819	0.0411162	0.794342	FALSE
NR3C1 interface RXRB	3	959	0.20089	0.0126996	0.18819	0.214318	0.606689	0.310475	0.243433	0.87809	0.310192	0.488087	0.0548901	0.504501	0.794342	FALSE
HIF1A truncating	4	938	-0.296493	0.00858522	-0.305078	1.13032	0.826503	-0.368608	-0.285217	0.269904	0.36912	0.491468	0.554402	0.175398	0.794342	FALSE
ATF2 missense	9	966	0.19324	0.00584375	0.187396	0.531919	0.846507	0.221929	0.194701	0.352302	0.221376	0.492563	0.473116	0.34542	0.794342	FALSE
JUN missense	4	982	-0.28519	0.0107932	-0.295983	0.15815	0.674535	-0.439429	-0.230817	1.87154	0.438796	0.492753	0.00153763	0.618016	0.794342	FALSE
SMAD3 interface SMAD3	3	970	0.295837	0.0103001	0.285537	0.814001	0.740286	0.385628	0.294173	0.350782	0.385711	0.493455	0.174081	0.39434	0.794342	FALSE
HNF4A missense	14	954	-0.171742	-0.0159972	-0.155745	0.634194	0.729781	-0.213766	-0.131817	0.245579	0.213413	0.499112	0.0347344	0.0113138	0.799549	FALSE
JUND missense	3	982	-0.317597	0.0104899	-0.328087	0.834111	0.680954	-0.48156	-0.26445	0.393337	0.481805	0.501875	0.0193708	0.365673	0.80009	FALSE
TCF3 missense	18	959	0.0801737	-0.0161408	0.0963145	0.865616	0.761916	0.126092	0.12217	0.111267	0.126411	0.504979	0.520834	0.680736	0.801168	FALSE
POU5F1 missense	11	969	0.162296	-0.00587943	0.168175	0.845786	0.825454	0.203685	0.164371	0.198839	0.203737	0.514961	0.665466	0.987293	0.813097	FALSE
CDX2 p.V306fs	4	976	-0.420577	0.003627	-0.424204	0.986588	0.692802	-0.611339	-0.226015	0.42997	0.612302	0.522478	0.00170673	0.801564	0.820368	FALSE
MAZ missense	5	967	-0.30608	-0.00235446	-0.303726	1.10302	0.888057	-0.34163	-0.25591	0.275358	0.342012	0.524538	0.631251	0.903391	0.820368	FALSE
E2F7 truncating	5	936	-0.151805	0.0154057	-0.167211	0.624953	0.898221	-0.186362	-0.256229	0.267557	0.186158	0.527167	0.115948	0.581487	0.820564	FALSE
GATA3 p.A395T // GATA3 p.395	5	952	0.102151	-0.00605459	0.108206	0.450041	0.590995	0.183252	0.165185	0.240435	0.183091	0.531474	0.0158203	0.137261	0.820564	FALSE
TP53 p.R158L	4	353	0.110607	0.35952	-0.248913	0.463417	0.791783	-0.315248	-0.250054	0.537125	0.314371	0.532123	0.946352	0.72224	0.820564	FALSE
REST p.A673V // REST p.673	6	930	-0.15553	-0.00466452	-0.150866	0.445888	0.628428	-0.240388	-0.156395	0.338349	0.240068	0.54399	0.297354	0.92744	0.834961	FALSE
GABPA missense	18	964	0.11038	0.00971866	0.100661	1.17687	0.878404	0.113813	0.128997	0.0855327	0.114595	0.549082	0.789961	0.706354	0.838876	FALSE
MEF2A truncating	3	977	-0.490329	0.00716425	-0.497493	1.29163	0.916674	-0.542169	-0.316652	0.385166	0.542715	0.553739	0.00267655	0.204586	0.839518	FALSE
SREBF2 truncating	4	944	0.315857	-0.00478238	0.32064	0.923659	0.837604	0.382674	0.252857	0.34714	0.382806	0.554591	0.49167	0.0614424	0.839518	FALSE
GATA2 truncating	4	969	-0.154823	0.00121285	-0.156036	0.447554	0.767025	-0.203637	0.228947	0.348641	0.203429	0.563785	0.00129151	0.605166	0.846974	FALSE
NR3C1 interface NR3C1	3	959	-0.23348	0.0126996	-0.24618	0.446416	0.606689	-0.40597	-0.202585	0.551458	0.405776	0.564649	0.0670508	0.50639	0.846974	FALSE
MYC hotspot S71 // MYC hotspot Y74 // MYC p.72	4	977	0.213531	0.0160768	0.197454	0.409251	0.777087	0.254377	0.219548	0.482477	0.254095	0.573869	0.359424	0.769423	0.852923	FALSE
GATA4 missense	14	971	0.151621	0.0057785	0.145843	0.823474	0.906558	0.161062	0.136973	0.177107	0.160875	0.574823	0.212853	0.329727	0.852923	FALSE
FOXO3 missense	16	947	-0.137603	-0.00080305	-0.1368	0.666816	0.855541	-0.160391	-0.125083	0.205154	0.159899	0.577853	0.920946	0.728294	0.852923	FALSE
STAT1 missense	8	962	0.0307162	0.00279886	0.0279173	1.20704	0.73972	0.0375155	0.146499	0.0231287	0.0377404	0.580631	0.000493485	0.9019	0.852923	FALSE
SOX2 missense	12	972	0.0543922	0.00244968	0.0519425	0.817007	0.913389	0.0569317	0.148468	0.0635765	0.0568679	0.581538	0.273244	0.108009	0.852923	FALSE
SP1 missense	15	957	-0.147981	0.00177765	-0.149758	1.15684	0.742146	-0.199741	-0.106812	0.129455	0.201791	0.584656	0.00450368	0.848823	0.853702	FALSE
RELA missense	11	966	-0.225693	0.0032236	-0.228917	0.465325	0.725979	-0.316279	-0.121239	0.49195	0.315322	0.587456	0.00563236	0.826558	0.854012	FALSE
HIF1A hotspot S692	3	938	0.236254	0.00858522	0.227669	0.462607	0.826503	0.275663	0.25425	0.492144	0.275461	0.594409	0.554073	0.170413	0.854943	FALSE
MYCN truncating	3	964	-0.113084	0.00712159	-0.120205	0.0306333	0.795649	-0.151235	-0.247119	3.92401	0.151078	0.595154	0.285952	0.333631	0.854943	FALSE
RXRA missense	12	964	0.0337204	-0.00553947	0.0392598	0.583372	0.764804	0.0514549	0.118654	0.0672981	0.0513332	0.595869	0.0321213	0.896824	0.854943	FALSE
ESR2 interface ESR2	4	950	-0.200721	-0.00309991	-0.197621	0.208656	0.663972	-0.298059	-0.175356	0.947117	0.297635	0.600997	0.468873	0.378833	0.858568	FALSE
E2F6 interface TFDP2	4	982	-0.111386	0.00856028	-0.119947	0.506037	0.827572	-0.145076	-0.21485	0.237031	0.144938	0.604053	0.00276036	0.940791	0.859213	FALSE
E2F6 interface TFDP1	4	982	-0.111386	0.00856028	-0.119947	0.506037	0.827572	-0.145076	-0.21485	0.237031	0.144938	0.604053	0.00276036	0.940791	0.859213	FALSE
E2F6 missense	4	982	-0.111386	0.00856028	-0.119947	0.506037	0.827572	-0.145076	-0.21485	0.237031	0.144938	0.604053	0.00276036	0.940791	0.859213	FALSE
ATF3 missense	7	975	-0.180835	0.0118184	-0.192653	0.637	0.813692	-0.237046	-0.157521	0.302439	0.236764	0.608312	0.00095295	0.929642	0.861558	FALSE
ZEB1 truncating	10	923	0.0158981	-0.00465642	0.0205545	0.788825	0.69732	0.0294367	0.115489	0.0260571	0.0294764	0.614818	0.193922	0.957497	0.865518	FALSE
E2F1 missense	8	969	0.265906	0.00802315	0.257882	0.565283	0.862886	0.299475	0.155211	0.456201	0.29886	0.616354	0.148262	0.542634	0.865518	FALSE
TP53 p.R209fs // TP53 p.R77fs	3	353	0.140398	0.35952	-0.219122	0.557297	0.791783	-0.27714	-0.229593	0.393187	0.276745	0.619094	0.945267	0.708045	0.865682	FALSE
TP53 p.R116fs	3	353	0.140398	0.35952	-0.219122	0.557297	0.791783	-0.27714	-0.229593	0.393187	0.276745	0.619094	0.945267	0.708045	0.865682	FALSE
EGR1 p.P332fs	3	945	-0.244372	-0.00332519	-0.241047	0.257981	0.877454	-0.274978	-0.248156	0.934359	0.274712	0.626523	0.607819	0.600252	0.872374	FALSE
RXRA 3D hotspot 128-456-4nqa	3	964	0.0344792	-0.00553947	0.0400187	1.08478	0.764804	0.0522707	0.214125	0.0368911	0.0523254	0.63257	0.0353457	0.900554	0.876127	FALSE
BACH1 missense	18	959	0.0951304	0.00617871	0.0889517	0.831227	0.85443	0.104155	0.0968306	0.107013	0.104106	0.634528	0.34686	0.0705057	0.876127	FALSE
AHR truncating	6	950	-0.326777	0.00291695	-0.329694	0.325217	0.77743	-0.425002	-0.152267	1.01377	0.424083	0.637989	0.0181962	0.362415	0.877234	FALSE
SMAD4 p.351	3	934	0.169013	0.00966651	0.159346	0.391054	0.609714	0.261511	0.161619	0.407479	0.261346	0.647587	0.800168	0.90554	0.880904	FALSE
ESR1 interface THRA	4	962	0.0806338	0.00157536	0.0790584	0.190322	0.620272	0.127638	0.142681	0.415393	0.127458	0.647691	0.0250222	0.21495	0.880904	FALSE
FOXA2 missense	8	966	-0.0133693	-0.000434032	-0.0129353	0.454867	0.659279	-0.0196575	0.106296	0.0284375	0.0196203	0.648666	0.000228579	0.128849	0.880904	FALSE
STAT3 truncating	3	957	-0.0913417	0.0119111	-0.103253	0.889498	0.710762	-0.145185	0.189625	0.11608	0.145271	0.654294	0.0106868	0.704588	0.884906	FALSE
HLF missense	9	971	-0.0342054	-8.40647e-05	-0.0341214	0.44761	0.776434	-0.0440667	-0.110941	0.0762301	0.0439462	0.673317	0.13258	0.659969	0.901648	FALSE
YBX1 missense	5	978	0.167871	0.0062199	0.161651	0.746185	0.873629	0.185136	0.162318	0.216637	0.185034	0.679359	0.868217	0.647074	0.901648	FALSE
SREBF2 missense	34	944	-0.039314	-0.00478238	-0.0345316	0.874515	0.837604	-0.041164	-0.0606374	0.0394865	0.0412266	0.680872	0.54626	0.123162	0.901648	FALSE
HNF1A truncating	6	968	-0.150964	0.0067678	-0.157732	0.656971	0.795211	-0.198515	-0.133356	0.240089	0.198352	0.687378	0.814379	0.254174	0.901648	FALSE
FOXM1 missense	14	957	0.159378	0.0156606	0.143718	1.00014	0.928135	0.154678	0.100571	0.143697	0.154846	0.688413	0.0469701	0.436585	0.901648	FALSE
FOS missense	4	980	0.151658	0.00532184	0.146336	0.323248	0.907495	0.161468	0.181816	0.452704	0.161252	0.689289	0.325798	0.339585	0.901648	FALSE
TP53 p.R273L	7	353	0.215185	0.35952	-0.144335	0.733203	0.791783	-0.18251	-0.123664	0.196856	0.182292	0.690829	0.947014	0.711457	0.901648	FALSE
TP63 missense	23	938	-0.114382	-0.000410519	-0.113972	0.58355	0.710652	-0.160979	-0.0594439	0.195308	0.160376	0.696167	0.169493	0.741266	0.901648	FALSE
ARNT missense	13	955	0.0806967	-0.00450414	0.0852009	0.731691	0.867028	0.0984439	0.0955745	0.116444	0.0982677	0.69751	0.217591	0.810425	0.901648	FALSE
MITF missense	11	963	0.0552601	-0.00615224	0.0614124	0.660778	0.675954	0.0908737	0.0799857	0.0929394	0.0908529	0.698718	0.200164	0.662126	0.901648	FALSE
MYC p.P72T	3	977	0.167989	0.0160768	0.151912	0.488656	0.777087	0.19561	0.174006	0.310877	0.195489	0.699334	0.359787	0.769802	0.901648	FALSE
ELF5 truncating	3	975	0.19853	0.00458103	0.193949	0.468164	0.865783	0.224179	0.193656	0.414276	0.224016	0.69946	0.926264	0.261096	0.901648	FALSE
TP53 p.R249S	5	353	0.239802	0.35952	-0.119718	0.226915	0.791783	-0.151987	-0.131837	0.52759	0.151201	0.712973	0.945471	0.713721	0.911712	FALSE
TP53 p.249	5	353	0.239802	0.35952	-0.119718	0.226915	0.791783	-0.151987	-0.131837	0.52759	0.151201	0.712973	0.945471	0.713721	0.911712	FALSE
TP53 p.R158H	4	353	0.211938	0.35952	-0.147582	0.557018	0.791783	-0.186791	-0.145578	0.26495	0.186392	0.71615	0.945074	0.705566	0.911712	FALSE
RREB1 truncating	3	901	-0.00704525	-0.00609807	-0.000947179	0.65307	0.875949	-0.00108185	-0.183324	0.00145035	0.00108132	0.720334	0.262368	0.0251235	0.911712	FALSE
CLOCK missense	26	951	0.0654778	-0.0139454	0.0794233	1.04918	0.901663	0.0876883	0.0647045	0.0757005	0.0880853	0.722435	0.891223	0.429584	0.911712	FALSE
ZNF263 missense	11	965	-0.102151	-0.0116857	-0.0904654	0.799182	0.788395	-0.11473	-0.0851693	0.113198	0.114746	0.72398	0.785114	0.905881	0.911712	FALSE
ATF4 missense	9	975	-0.101563	0.00814666	-0.10971	0.650373	0.873493	-0.125828	-0.102631	0.168688	0.125599	0.726341	0.624459	0.590765	0.911712	FALSE
ERG missense	16	960	0.038373	0.00374084	0.0346322	1.26088	0.923101	0.0372696	0.0817957	0.0274666	0.0375172	0.727333	0.0363613	0.61536	0.911712	FALSE
TP53 p.234	4	353	0.221651	0.35952	-0.137869	0.285238	0.791783	-0.174769	-0.137407	0.483348	0.174125	0.73106	0.945572	0.714146	0.911712	FALSE
HIF1A hotspot S696	4	938	0.119488	0.00858522	0.110903	0.444081	0.826503	0.134336	0.140949	0.249736	0.134183	0.73338	0.554078	0.169234	0.911712	FALSE
TP53 p.272	7	353	0.259754	0.35952	-0.0997665	0.708017	0.791783	-0.126215	-0.102883	0.14091	0.126002	0.734895	0.944186	0.687467	0.911712	FALSE
NR3C1 truncating	8	959	-0.184059	0.0126996	-0.196758	0.671203	0.606689	-0.324051	-0.070234	0.293143	0.324315	0.751332	0.0269762	0.513242	0.921259	FALSE
MYCN interface MAX	3	964	0.0847333	0.00712159	0.0776117	0.642026	0.795649	0.0975804	-0.149255	0.120886	0.0975451	0.752631	0.284876	0.336591	0.921259	FALSE
[truncated: 68 more rows]
