# Supplementary material for: Transcription Factor Activities Enhance Markers of Drug Sensitivity in Cancer
Source: Oxford University Press journal article supplement (doi:10.1158/0008-5472.can-17-1679), 2017-12-11
Supplement: 00085472can171679-sup-184371_2_supp_4394328_3zgxjn.xlsx [file 00085472can171679-sup-184371_2_supp_4394328_3zgxjn.xlsx]

## Sheet: table S5A
Table S5A. Functional characterization of driver mutations. Full list of ANOVA pan-cancer interactions between mutation classes in driver genes and TF activities in primary tumors
TF	Mut_gene	mutation_group	POS	NEG	POS_Y_MEAN	NEG_Y_MEAN	deltaMEAN_Y	POS_Y_sd	NEG_Y_sd	X_effect_size	POS_Glass_delta	NEG_Glass_delta	X_ANOVA_pval	X_ANOVA_coef	AGE_ANOVA_pval	GENDER_PVAL	X_ANOVA_fdr	dist	TF_tumor_assos	Gene_cancer_role	is_significant
FOXM1	TP53	TP53 missense	1991	4377	0.137891	-0.0786171	0.216509	0.545744	0.571004	0.384406	0.396722	0.379172	1.22605e-45	0.217435	0.00914881	2.54381e-07	1.79e-41	2	activated in tumors	TSG	TRUE
FOXM1	TP53	TP53 truncating	800	4377	0.193814	-0.0786171	0.272432	0.588275	0.571004	0.474864	0.463103	0.47711	1.35657e-34	0.272154	0.000864864	3.54451e-07	9.90276e-31	2	activated in tumors	TSG	TRUE
E2F1	RB1	RB1 truncating	155	6859	0.580252	0.00188835	0.578364	0.685017	0.628853	0.917833	0.844306	0.919712	4.22937e-30	0.585802	0.0180411	0.000120815	3.48923e-27	1	activated in tumors	TSG	TRUE
NRF1	TP53	TP53 missense	1991	4377	0.126991	-0.104357	0.231348	0.824548	0.739101	0.301692	0.280576	0.313013	4.12733e-29	0.232884	0.00187783	1.46831e-09	2.00859e-25	6	activated in tumors	TSG	TRUE
ATF4	TP53	TP53 truncating	800	4377	0.216542	-0.124476	0.341018	0.856234	0.818415	0.413673	0.398277	0.416681	4.7182e-26	0.336647	0.609155	0.000583984	1.44138e-22	3	activated in tumors	TSG	TRUE
ATF4	TP53	TP53 missense	1991	4377	0.111478	-0.124476	0.235954	0.796576	0.818415	0.290709	0.296211	0.288307	4.93633e-26	0.232681	0.0792863	0.000638285	1.44138e-22	3	activated in tumors	TSG	TRUE
E2F4	TP53	TP53 missense	1991	4377	0.122871	-0.0647709	0.187641	0.692013	0.668715	0.277541	0.271153	0.2806	5.73178e-25	0.189321	0.00297227	8.91786e-06	1.39471e-21	2	activated in tumors	TSG	TRUE
FOS	TP53	TP53 missense	1991	4377	0.124312	-0.0542338	0.178545	0.669405	0.659863	0.269356	0.266722	0.27058	1.39391e-23	0.180299	0.0388802	0.348658	2.90724e-20	2	activated in tumors	TSG	TRUE
ATF1	RB1	RB1 truncating	155	6859	0.598493	0.00273313	0.595759	0.879049	0.754436	0.786592	0.677731	0.789675	5.87674e-23	0.608131	2.2972e-06	0.000949199	2.42415e-20	3	activated in tumors	TSG	TRUE
NRF1	TP53	TP53 truncating	800	4377	0.178915	-0.104357	0.283272	0.844645	0.739101	0.374521	0.335375	0.383266	2.22538e-22	0.283952	0.000267297	8.53803e-06	4.06124e-19	6	activated in tumors	TSG	TRUE
FOS	CDH1	CDH1 truncating	122	6863	-0.550419	0.0342544	-0.584674	0.758448	0.667764	-0.873377	0.770882	0.875569	1.4444e-21	-0.588395	0.0478681	0.333847	1.0833e-18	3	activated in tumors	TSG	TRUE
FOSL2	TP53	TP53 missense	1991	4377	-0.0999503	0.0667705	-0.166721	0.687862	0.659173	-0.24948	0.242375	0.252924	1.57123e-20	-0.168607	0.0573605	0.958539	2.54883e-17	3	no differential activity	TSG	TRUE
STAT1	BRAF	BRAF hotspot S602	483	6510	0.339452	-0.0100734	0.349525	0.760535	0.796383	0.440229	0.459578	0.438891	2.40244e-20	0.349585	0.363748	0.000525125	5.43425e-17	3	deactivated in tumors	Oncogene	TRUE
E2F4	TP53	TP53 truncating	800	4377	0.175025	-0.0647709	0.239796	0.733131	0.668715	0.353129	0.327085	0.358592	4.78637e-20	0.240278	0.00201418	0.00013838	6.98796e-17	2	activated in tumors	TSG	TRUE
STAT1	BRAF	BRAF p.600	460	6510	0.341399	-0.0100734	0.351472	0.759823	0.796383	0.442645	0.462571	0.441335	1.23934e-19	0.350993	0.370469	0.00038925	9.51755e-17	3	deactivated in tumors	Oncogene	TRUE
STAT1	BRAF	BRAF interaction increasing MAP2K1 // BRAF p.V600E	457	6510	0.342094	-0.0100734	0.352167	0.759088	0.796383	0.443538	0.463935	0.442208	1.41357e-19	0.351554	0.36208	0.000395502	9.51755e-17	3	deactivated in tumors	Oncogene	TRUE
STAT1	BRAF	BRAF activitygain	467	6510	0.337734	-0.0100734	0.347807	0.76465	0.796383	0.437878	0.454858	0.436734	1.68306e-19	0.347213	0.368807	0.000383653	9.51755e-17	3	deactivated in tumors	Oncogene	TRUE
STAT1	BRAF	BRAF hotspot T599	494	6510	0.327002	-0.0100734	0.337075	0.774398	0.796383	0.424071	0.435274	0.423258	2.41073e-19	0.336738	0.441802	0.000392199	1.0906e-16	3	deactivated in tumors	Oncogene	TRUE
E2F1	TP53	TP53 missense	1991	4377	0.103681	-0.0480138	0.151695	0.619537	0.62954	0.242157	0.244852	0.240961	2.89849e-19	0.152446	0.0454012	3.91367e-05	3.847e-16	2	activated in tumors	TSG	TRUE
STAT1	BRAF	BRAF interaction disrupting MAP2K1	469	6510	0.3313	-0.0100734	0.341373	0.76063	0.796383	0.429922	0.448803	0.428655	6.2634e-19	0.340625	0.409576	0.000406604	2.36127e-16	3	deactivated in tumors	Oncogene	TRUE
E2F7	RB1	RB1 truncating	155	6859	0.437785	0.00188171	0.435904	0.609258	0.622959	0.700065	0.715467	0.699731	2.56846e-18	0.442564	0.0168231	0.00170325	7.06325e-16	2	activated in tumors	TSG	TRUE
FOXM1	TP53	TP53 interface TP53	596	4377	0.138132	-0.0786171	0.216749	0.559529	0.571004	0.3805	0.387377	0.379593	4.60058e-18	0.215626	0.0118708	7.2359e-11	5.59725e-15	2	activated in tumors	TSG	TRUE
STAT1	BRAF	BRAF missense	624	6510	0.279954	-0.0100734	0.290027	0.782191	0.796383	0.364744	0.370788	0.364181	5.25928e-18	0.289675	0.586564	0.000385695	1.64991e-15	3	deactivated in tumors	Oncogene	TRUE
RELA	BRAF	BRAF activitygain	467	6510	0.275402	-0.0142573	0.289659	0.743068	0.700792	0.411625	0.389815	0.413331	5.83531e-18	0.294056	0.0560633	0.00306186	1.64991e-15	3	no differential activity	Oncogene	TRUE
E2F7	TP53	TP53 missense	1991	4377	0.100706	-0.0438711	0.144577	0.590654	0.63579	0.232427	0.244774	0.227397	5.96456e-18	0.145684	0.03233	0.00123267	6.69853e-15	3	activated in tumors	TSG	TRUE
RELA	BRAF	BRAF interaction increasing MAP2K1 // BRAF p.V600E	457	6510	0.274499	-0.0142573	0.288756	0.738246	0.700792	0.410571	0.391138	0.412043	1.50954e-17	0.293272	0.057088	0.00310479	3.54294e-15	3	no differential activity	Oncogene	TRUE
RELA	BRAF	BRAF hotspot S602	483	6510	0.266227	-0.0142573	0.280485	0.735514	0.700792	0.398846	0.381345	0.400239	1.56631e-17	0.285377	0.048826	0.00314526	3.54294e-15	3	no differential activity	Oncogene	TRUE
NRF1	TP53	TP53 3D hotspot 96-288-2mej	501	4377	0.191798	-0.104357	0.296155	0.806132	0.739101	0.396857	0.367378	0.400696	1.72771e-17	0.299654	0.00330685	2.60872e-09	1.80172e-14	6	activated in tumors	TSG	TRUE
RELA	BRAF	BRAF p.600	460	6510	0.272366	-0.0142573	0.286623	0.736954	0.700792	0.40758	0.38893	0.408999	2.00022e-17	0.291169	0.0587574	0.00291519	4.11311e-15	3	no differential activity	Oncogene	TRUE
E2F1	TP53	TP53 truncating	800	4377	0.158984	-0.0480138	0.206998	0.658167	0.62954	0.326472	0.314507	0.328808	2.63463e-17	0.206971	0.00765691	0.000141311	2.56432e-14	2	activated in tumors	TSG	TRUE
TP53	BRAF	BRAF interaction increasing MAP2K1 // BRAF p.V600E	457	6510	0.287113	-0.0132304	0.300343	0.73892	0.734403	0.408798	0.406462	0.408963	4.51602e-17	0.301961	0.462422	0.194841	8.03943e-15	2	deactivated in tumors	Oncogene	TRUE
FOXM1	TP53	TP53 3D hotspot 97-287-1ycs	581	4377	0.132093	-0.0786171	0.21071	0.566695	0.571004	0.369341	0.371822	0.369016	4.88083e-17	0.211281	0.0424136	5.02996e-10	4.45367e-14	2	activated in tumors	TSG	TRUE
TP53	BRAF	BRAF hotspot T599	494	6510	0.275868	-0.0132304	0.289098	0.75577	0.734403	0.392836	0.382522	0.393651	4.92828e-17	0.290929	0.433843	0.161098	8.03943e-15	2	deactivated in tumors	Oncogene	TRUE
RELA	BRAF	BRAF interaction disrupting MAP2K1	469	6510	0.266398	-0.0142573	0.280655	0.736913	0.700792	0.39907	0.380852	0.400482	4.97585e-17	0.284654	0.0675368	0.00297335	8.03943e-15	3	no differential activity	Oncogene	TRUE
FOSL2	TP53	TP53 truncating	800	4377	-0.149119	0.0667705	-0.215889	0.750979	0.659173	-0.320232	0.287477	0.327515	5.31274e-17	-0.218281	0.0772137	0.777544	4.56261e-14	3	no differential activity	TSG	TRUE
TP53	BRAF	BRAF p.600	460	6510	0.284288	-0.0132304	0.297518	0.738441	0.734403	0.404969	0.4029	0.405116	7.0697e-17	0.299073	0.474319	0.186638	1.0661e-14	2	deactivated in tumors	Oncogene	TRUE
NFKB1	BRAF	BRAF activitygain	467	6510	0.285755	-0.0120861	0.297841	0.828962	0.741475	0.398376	0.359294	0.401687	9.7864e-17	0.300492	0.136635	0.00206457	1.33245e-14	3	no differential activity	Oncogene	TRUE
RELA	BRAF	BRAF hotspot T599	494	6510	0.256836	-0.0142573	0.271093	0.747123	0.700792	0.384991	0.362849	0.386838	1.00142e-16	0.275391	0.0697678	0.00282203	1.33245e-14	3	no differential activity	Oncogene	TRUE
TP53	BRAF	BRAF interaction disrupting MAP2K1	469	6510	0.278325	-0.0132304	0.291556	0.739356	0.734403	0.396817	0.394338	0.396997	1.49875e-16	0.292938	0.494802	0.206913	1.8834e-14	2	deactivated in tumors	Oncogene	TRUE
FOXM1	TP53	TP53 interface TP53BP2	568	4377	0.130055	-0.0786171	0.208672	0.567958	0.571004	0.365671	0.367407	0.365448	1.68072e-16	0.209702	0.0379347	4.15426e-10	1.36322e-13	2	activated in tumors	TSG	TRUE
NFKB1	BRAF	BRAF hotspot S602	483	6510	0.277525	-0.0120861	0.289611	0.823015	0.741475	0.3875	0.35189	0.390587	1.84455e-16	0.292923	0.119973	0.00234063	2.19596e-14	3	no differential activity	Oncogene	TRUE
NFKB1	BRAF	BRAF interaction increasing MAP2K1 // BRAF p.V600E	457	6510	0.28523	-0.0120861	0.297316	0.825036	0.741475	0.39789	0.360367	0.400979	2.20327e-16	0.3	0.139289	0.00214277	2.49186e-14	3	no differential activity	Oncogene	TRUE
FOXM1	TP53	TP53 3D hotspot 96-288-2mej	501	4377	0.137885	-0.0786171	0.216502	0.555857	0.571004	0.380181	0.389492	0.37916	3.36531e-16	0.219019	0.00480357	6.82409e-11	2.58593e-13	2	activated in tumors	TSG	TRUE
NFKB1	BRAF	BRAF p.600	460	6510	0.282196	-0.0120861	0.294282	0.824212	0.741475	0.393842	0.357046	0.396887	3.47845e-16	0.297007	0.14339	0.00196647	3.74674e-14	3	no differential activity	Oncogene	TRUE
TP53	BRAF	BRAF activitygain	467	6510	0.275563	-0.0132304	0.288793	0.746423	0.734403	0.392802	0.386902	0.393235	3.76775e-16	0.289917	0.523621	0.188315	3.79036e-14	2	deactivated in tumors	Oncogene	TRUE
SOX2	BRAF	BRAF p.600	460	6510	-0.266932	0.0144532	-0.281385	0.797755	0.724162	-0.385862	0.352722	0.388566	3.8541e-16	-0.289474	0.0187373	0.054191	3.79036e-14	5	deactivated in tumors	Oncogene	TRUE
FOXM1	TP53	TP53 interface PPP1R13L	587	4377	0.123943	-0.0786171	0.202561	0.549403	0.571004	0.35631	0.368692	0.354744	4.28891e-16	0.203033	0.0383357	2.2983e-10	3.13084e-13	2	activated in tumors	TSG	TRUE
FOS	TP53	TP53 truncating	800	4377	0.152694	-0.0542338	0.206927	0.715241	0.659863	0.309441	0.289311	0.313591	4.69326e-16	0.209612	0.0027938	0.280027	3.26287e-13	2	activated in tumors	TSG	TRUE
FOSL2	PIK3CA	PIK3CA missense	1097	6014	0.149273	-0.0298115	0.179084	0.680648	0.68435	0.261903	0.263108	0.261685	5.15336e-16	0.184763	0.149362	0.00922819	2.7438e-12	3	no differential activity	Oncogene	TRUE
BACH1	BRAF	BRAF activitygain	467	6510	0.299681	0.00172017	0.297961	0.692526	0.754021	0.397244	0.430252	0.395162	6.05748e-16	0.293676	0.23622	0.446166	5.70909e-14	4	no differential activity	Oncogene	TRUE
SOX2	BRAF	BRAF interaction increasing MAP2K1 // BRAF p.V600E	457	6510	-0.265755	0.0144532	-0.280208	0.794912	0.724162	-0.384371	0.352502	0.386941	6.40338e-16	-0.288111	0.0204683	0.0530119	5.7937e-14	5	deactivated in tumors	Oncogene	TRUE
NFKB1	BRAF	BRAF interaction disrupting MAP2K1	469	6510	0.276255	-0.0120861	0.288341	0.824778	0.741475	0.385816	0.349598	0.388875	7.58022e-16	0.290679	0.158951	0.00211299	6.4842e-14	3	no differential activity	Oncogene	TRUE
E2F4	RB1	RB1 truncating	155	6859	0.440706	0.00115492	0.439551	0.727103	0.684915	0.640867	0.604524	0.64176	7.71286e-16	0.449496	0.00063991	5.90088e-05	1.59078e-13	2	activated in tumors	TSG	TRUE
TP53	BRAF	BRAF hotspot S602	483	6510	0.267203	-0.0132304	0.280433	0.740037	0.734403	0.38165	0.378945	0.381852	7.73988e-16	0.282069	0.458337	0.168713	6.4842e-14	2	deactivated in tumors	Oncogene	TRUE
STAT3	BRAF	BRAF interaction increasing MAP2K1 // BRAF p.V600E	457	6510	0.27416	-0.0109224	0.285082	0.636349	0.723536	0.396966	0.447996	0.394012	9.06106e-16	0.282405	0.969909	0.0285949	7.2447e-14	3	deactivated in tumors	Oncogene	TRUE
STAT3	BRAF	BRAF p.600	460	6510	0.27299	-0.0109224	0.283912	0.634572	0.723536	0.395413	0.447407	0.392395	9.28821e-16	0.281333	0.976334	0.0278739	7.2447e-14	3	deactivated in tumors	Oncogene	TRUE
ESR1	TP53	TP53 truncating	800	4377	-0.14088	0.0908228	-0.231702	0.855274	0.707762	-0.316326	0.27091	0.327373	9.31365e-16	-0.227144	0.307064	0.000579905	6.18075e-13	3	deactivated in tumors	TSG	TRUE
SOX2	BRAF	BRAF interaction disrupting MAP2K1	469	6510	-0.261127	0.0144532	-0.27558	0.795747	0.724162	-0.37793	0.346316	0.38055	9.81397e-16	-0.282541	0.0251712	0.0431633	7.39963e-14	5	deactivated in tumors	Oncogene	TRUE
STAT3	BRAF	BRAF activitygain	467	6510	0.270428	-0.0109224	0.28135	0.64816	0.723536	0.391445	0.434075	0.388854	1.14552e-15	0.278626	0.999803	0.0264871	8.3311e-14	3	deactivated in tumors	Oncogene	TRUE
BACH1	BRAF	BRAF p.600	460	6510	0.29899	0.00172017	0.29727	0.686133	0.754021	0.396498	0.433254	0.394246	1.18977e-15	0.292706	0.225573	0.436395	8.3311e-14	4	no differential activity	Oncogene	TRUE
BACH1	BRAF	BRAF interaction increasing MAP2K1 // BRAF p.V600E	457	6510	0.29985	0.00172017	0.29813	0.688021	0.754021	0.397572	0.433316	0.395387	1.21543e-15	0.293611	0.228877	0.432418	8.3311e-14	4	no differential activity	Oncogene	TRUE
STAT3	BRAF	BRAF hotspot T599	494	6510	0.261371	-0.0109224	0.272293	0.649013	0.723536	0.378953	0.41955	0.376337	1.50213e-15	0.270011	0.951788	0.0316122	9.99341e-14	3	deactivated in tumors	Oncogene	TRUE
FOXM1	RB1	RB1 truncating	155	6859	0.369225	0.00273533	0.366489	0.574943	0.576353	0.63591	0.637436	0.635876	1.56368e-15	0.373712	0.0167763	2.16117e-05	2.58008e-13	2	activated in tumors	TSG	TRUE
NFKB1	BRAF	BRAF hotspot T599	494	6510	0.26563	-0.0120861	0.277716	0.828936	0.741475	0.371293	0.335027	0.374545	1.59922e-15	0.280659	0.147273	0.00193888	1.03354e-13	3	no differential activity	Oncogene	TRUE
SOX2	BRAF	BRAF hotspot T599	494	6510	-0.251384	0.0144532	-0.265837	0.801994	0.724162	-0.364204	0.331471	0.367096	1.78322e-15	-0.27347	0.0191308	0.0552808	1.12044e-13	5	deactivated in tumors	Oncogene	TRUE
SOX2	BRAF	BRAF hotspot S602	483	6510	-0.254289	0.0144532	-0.268742	0.806466	0.724162	-0.368072	0.333234	0.371107	1.84126e-15	-0.276427	0.0200173	0.0531971	1.12564e-13	5	deactivated in tumors	Oncogene	TRUE
STAT3	BRAF	BRAF hotspot S602	483	6510	0.262287	-0.0109224	0.27321	0.639566	0.723536	0.380482	0.42718	0.377603	2.20102e-15	0.271179	0.951243	0.0324674	1.31017e-13	3	deactivated in tumors	Oncogene	TRUE
STAT3	BRAF	BRAF interaction disrupting MAP2K1	469	6510	0.265216	-0.0109224	0.276138	0.641715	0.723536	0.384412	0.430313	0.381651	3.08021e-15	0.273486	0.976992	0.027185	1.7865e-13	3	deactivated in tumors	Oncogene	TRUE
SOX2	BRAF	BRAF activitygain	467	6510	-0.256323	0.0144532	-0.270777	0.799883	0.724162	-0.371198	0.33852	0.373917	3.37135e-15	-0.277967	0.026297	0.0537172	1.8724e-13	5	deactivated in tumors	Oncogene	TRUE
BACH1	BRAF	BRAF interaction disrupting MAP2K1	469	6510	0.291618	0.00172017	0.289898	0.698414	0.754021	0.386314	0.41508	0.384469	3.39389e-15	0.285316	0.201736	0.459359	1.8724e-13	4	no differential activity	Oncogene	TRUE
FOXM1	CDH1	CDH1 truncating	122	6863	-0.413925	0.0221253	-0.43605	0.702598	0.572586	-0.75823	0.620626	0.761544	3.74886e-15	-0.415934	0.0239985	0.00121301	1.40582e-12	3	activated in tumors	TSG	TRUE
NRF1	TP53	TP53 interface TP53BP2	568	4377	0.154478	-0.104357	0.258835	0.798604	0.739101	0.346886	0.324109	0.350202	4.64626e-15	0.260607	0.00639029	3.00523e-09	2.94931e-12	6	activated in tumors	TSG	TRUE
NRF1	TP53	TP53 interface PPP1R13L	587	4377	0.149332	-0.104357	0.253689	0.79368	0.739101	0.340178	0.319636	0.34324	7.29644e-15	0.254754	0.00618499	6.8656e-10	4.43858e-12	6	activated in tumors	TSG	TRUE
NRF1	TP53	TP53 3D hotspot 97-287-1ycs	581	4377	0.150488	-0.104357	0.254845	0.801895	0.739101	0.341285	0.317803	0.344804	7.95404e-15	0.255986	0.00777604	5.54167e-09	4.64507e-12	6	activated in tumors	TSG	TRUE
ESR1	TP53	TP53 missense	1991	4377	-0.0637349	0.0908228	-0.154558	0.755351	0.707762	-0.21378	0.204617	0.218375	8.67529e-15	-0.152061	0.180117	0.000489696	4.87141e-12	3	deactivated in tumors	TSG	TRUE
ATF2	RB1	RB1 truncating	155	6859	-0.494841	0.0180848	-0.512926	0.822442	0.814552	-0.629568	0.623661	0.629703	8.86554e-15	-0.514613	0.207178	0.614657	1.21901e-12	2	deactivated in tumors	TSG	TRUE
TP53	BRAF	BRAF missense	624	6510	0.22654	-0.0132304	0.23977	0.761573	0.734403	0.325414	0.314835	0.326483	9.40827e-15	0.240514	0.555673	0.123749	5.06695e-13	2	deactivated in tumors	Oncogene	TRUE
RELA	BRAF	BRAF missense	624	6510	0.212611	-0.0142573	0.226869	0.751459	0.700792	0.321634	0.301904	0.323732	1.11051e-14	0.229472	0.095672	0.0022704	5.84171e-13	3	no differential activity	Oncogene	TRUE
FOXM1	TP53	TP53 3D hotspot 97-291-4a63	494	4377	0.128152	-0.0786171	0.206769	0.554369	0.571004	0.363172	0.372981	0.362115	1.25197e-14	0.208127	0.0276838	2.18471e-10	6.76976e-12	2	activated in tumors	TSG	TRUE
SP1	BRAF	BRAF interaction increasing MAP2K1 // BRAF p.V600E	457	6510	0.266101	-0.00437926	0.27048	0.723066	0.734312	0.368712	0.374074	0.368345	1.29338e-14	0.276533	0.130539	0.540844	6.64905e-13	3	no differential activity	Oncogene	TRUE
VDR	KEAP1	KEAP1 missense	188	6941	-0.402208	0.0154789	-0.417687	0.83427	0.718097	-0.579008	0.500662	0.581659	1.54486e-14	-0.411496	0.73248	0.0501914	1.04278e-11	4	deactivated in tumors	Oncogene	TRUE
SP1	BRAF	BRAF p.600	460	6510	0.263649	-0.00437926	0.268028	0.722288	0.734312	0.365397	0.371082	0.365006	1.83828e-14	0.274004	0.131721	0.526384	9.24027e-13	3	no differential activity	Oncogene	TRUE
SP1	BRAF	BRAF interaction disrupting MAP2K1	469	6510	0.260973	-0.00437926	0.265353	0.721495	0.734312	0.361783	0.367782	0.361362	2.04835e-14	0.270755	0.144751	0.5484	9.901e-13	3	no differential activity	Oncogene	TRUE
SP1	BRAF	BRAF activitygain	467	6510	0.261542	-0.00437926	0.265921	0.72188	0.734312	0.362544	0.368373	0.362137	2.05727e-14	0.271442	0.146344	0.529022	9.901e-13	3	no differential activity	Oncogene	TRUE
NFKB1	BRAF	BRAF missense	624	6510	0.227152	-0.0120861	0.239238	0.824181	0.741475	0.319383	0.290274	0.322652	2.11746e-14	0.241076	0.18597	0.0015757	9.97838e-13	3	no differential activity	Oncogene	TRUE
NRF1	TP53	TP53 DNA/RNA aff. disabling	467	4377	0.172113	-0.104357	0.27647	0.784673	0.739101	0.371795	0.352338	0.374063	2.2758e-14	0.276	0.00622007	8.39772e-10	1.18664e-11	6	activated in tumors	TSG	TRUE
BACH1	BRAF	BRAF hotspot S602	483	6510	0.278976	0.00172017	0.277256	0.684287	0.754021	0.369959	0.405175	0.367703	2.32495e-14	0.272378	0.185166	0.448301	1.07326e-12	4	no differential activity	Oncogene	TRUE
JUND	KRAS	KRAS missense	543	6615	0.188792	-0.0107912	0.199583	0.599656	0.600997	0.332144	0.33283	0.332087	2.39928e-14	0.206059	0.00516152	0.0999497	2.51898e-11	4	deactivated in tumors	Oncogene	TRUE
STAT3	BRAF	BRAF missense	624	6510	0.22131	-0.0109224	0.232232	0.676033	0.723536	0.322763	0.343522	0.320968	2.6517e-14	0.230785	0.869007	0.0245285	1.19961e-12	3	deactivated in tumors	Oncogene	TRUE
FOSL2	PIK3CA	PIK3CA activitygain	599	6014	0.185437	-0.0298115	0.215248	0.689505	0.68435	0.314314	0.312178	0.314529	2.78833e-14	0.226261	0.098877	0.00150165	7.42293e-11	3	no differential activity	Oncogene	TRUE
NRF1	TP53	TP53 3D hotspot 97-291-4a63	494	4377	0.162063	-0.104357	0.266421	0.803126	0.739101	0.357212	0.33173	0.360466	3.08396e-14	0.268479	0.00373588	5.0922e-10	1.55259e-11	6	activated in tumors	TSG	TRUE
JUND	KRAS	KRAS interface ZDHHC17	400	6615	0.21816	-0.0107912	0.228951	0.571551	0.600997	0.381992	0.400578	0.380952	3.24825e-14	0.235662	0.00498265	0.221419	2.51898e-11	4	deactivated in tumors	Oncogene	TRUE
ESR1	MAP3K1	MAP3K1 truncating	87	6974	0.633361	0.0146095	0.618751	0.667687	0.743234	0.833492	0.926708	0.832512	3.54776e-14	0.611057	0.375484	0.202818	2.12865e-11	3	deactivated in tumors	TSG	TRUE
GATA3	PIK3CA	PIK3CA activitygain	599	6014	0.229315	0.0013729	0.227942	0.772457	0.692491	0.325585	0.295087	0.329163	4.72114e-14	0.229357	0.0220156	0.621473	8.37891e-11	4	deactivated in tumors	Oncogene	TRUE
ATF4	TP53	TP53 3D hotspot 96-288-2mej	501	4377	0.169235	-0.124476	0.293711	0.822164	0.818415	0.358709	0.357242	0.358878	4.86173e-14	0.291431	0.188591	3.58553e-06	2.36599e-11	3	activated in tumors	TSG	TRUE
SOX2	BRAF	BRAF missense	624	6510	-0.212286	0.0144532	-0.226739	0.802429	0.724162	-0.310035	0.282566	0.313105	7.25322e-14	-0.230482	0.0572536	0.0373769	3.21697e-12	5	deactivated in tumors	Oncogene	TRUE
NRF1	TP53	TP53 3D hotspot 96-290-2mej	433	4377	0.174604	-0.104357	0.278962	0.769514	0.739101	0.376017	0.362516	0.377433	7.69048e-14	0.279479	0.0101265	5.48524e-09	3.6219e-11	6	activated in tumors	TSG	TRUE
PBX1	MSH6	MSH6 p.T1085fs // MSH6 p.T783fs // MSH6 p.T955fs	26	7000	-0.953532	0.0121039	-0.965636	0.700391	0.658492	-1.46609	1.37871	1.46643	1.25072e-13	-0.961641	0.0549122	0.00478571	4.69019e-11	5	deactivated in tumors	TSG	TRUE
NRF1	TP53	TP53 Stability uniprot = D	218	4377	0.276748	-0.104357	0.381106	0.824885	0.739101	0.512668	0.462011	0.515634	1.35502e-13	0.381174	0.00116495	7.3169e-10	6.18217e-11	6	activated in tumors	TSG	TRUE
BACH1	BRAF	BRAF missense	624	6510	0.23968	0.00172017	0.237959	0.730212	0.754021	0.316447	0.325877	0.315587	1.40264e-13	0.234301	0.129094	0.649258	6.10141e-12	4	no differential activity	Oncogene	TRUE
NRF1	TP53	TP53 interface BCL2	434	4377	0.170513	-0.104357	0.27487	0.772558	0.739101	0.370358	0.355793	0.371898	1.72612e-13	0.275274	0.0101266	4.66844e-09	7.63663e-11	6	activated in tumors	TSG	TRUE
NRF1	TP53	TP53 interface BCL2L1	418	4377	0.173747	-0.104357	0.278104	0.776442	0.739101	0.374589	0.358177	0.376273	2.02145e-13	0.279264	0.00943499	4.91929e-09	8.68019e-11	6	activated in tumors	TSG	TRUE
SP1	BRAF	BRAF hotspot S602	483	6510	0.244062	-0.00437926	0.248441	0.727444	0.734312	0.338549	0.341526	0.338332	3.81877e-13	0.253752	0.156206	0.530046	1.6298e-11	3	no differential activity	Oncogene	TRUE
BACH1	BRAF	BRAF hotspot T599	494	6510	0.263317	0.00172017	0.261596	0.693276	0.754021	0.348839	0.377334	0.346935	4.17111e-13	0.256055	0.137733	0.524232	1.74721e-11	4	no differential activity	Oncogene	TRUE
SP1	BRAF	BRAF hotspot T599	494	6510	0.241094	-0.00437926	0.245473	0.73639	0.734312	0.334223	0.333346	0.33429	4.94648e-13	0.249986	0.20282	0.487624	2.03432e-11	3	no differential activity	Oncogene	TRUE
NRF1	CDH1	CDH1 truncating	122	6863	-0.54764	0.00319984	-0.55084	0.722124	0.783482	-0.703986	0.762806	0.703067	7.64148e-13	-0.51532	0.00890252	2.02582e-05	1.91037e-10	6	activated in tumors	TSG	TRUE
E2F7	TP53	TP53 truncating	800	4377	0.129811	-0.0438711	0.173682	0.615101	0.63579	0.274535	0.282363	0.273174	7.74932e-13	0.174763	0.00229077	0.00294963	3.23251e-10	3	activated in tumors	TSG	TRUE
E2F4	TP53	TP53 interface TP53	596	4377	0.147032	-0.0647709	0.211803	0.714798	0.668715	0.314063	0.296312	0.316731	8.69777e-13	0.21078	0.0390719	1.4657e-07	3.52736e-10	2	activated in tumors	TSG	TRUE
FOSL2	TP53	TP53 3D hotspot 97-291-4a63	494	4377	-0.157712	0.0667705	-0.224483	0.683466	0.659173	-0.339265	0.328448	0.340552	9.31116e-13	-0.224869	0.507028	0.254017	3.67406e-10	3	no differential activity	TSG	TRUE
FOXM1	TP53	TP53 3D hotspot 96-290-2mej	433	4377	0.125147	-0.0786171	0.203764	0.550759	0.571004	0.357974	0.369969	0.356853	1.06591e-12	0.204019	0.00588047	5.01095e-11	4.09525e-10	2	activated in tumors	TSG	TRUE
ZEB1	KRAS	KRAS interface ZDHHC17	400	6615	0.214105	-0.0171452	0.231251	0.700283	0.621539	0.369242	0.330225	0.372061	1.22618e-12	0.230539	0.724089	0.0898301	5.15091e-10	4	no differential activity	Oncogene	TRUE
JUND	KRAS	KRAS p.12	371	6615	0.210429	-0.0107912	0.221221	0.561655	0.600997	0.369331	0.393873	0.36809	1.32843e-12	0.22794	0.00482523	0.190257	5.15091e-10	4	deactivated in tumors	Oncogene	TRUE
FOXM1	TP53	TP53 interface BCL2	434	4377	0.123651	-0.0786171	0.202268	0.551319	0.571004	0.355318	0.366881	0.354233	1.50721e-12	0.202452	0.00575609	5.20262e-11	5.64227e-10	2	activated in tumors	TSG	TRUE
ATF4	MAP3K1	MAP3K1 truncating	87	6974	-0.654133	-0.0102068	-0.643926	0.932252	0.824779	-0.779409	0.690721	0.780726	1.53147e-12	-0.634329	0.0413864	0.0821469	4.59441e-10	3	activated in tumors	TSG	TRUE
FOSL2	TP53	TP53 interface TP53BP2	568	4377	-0.141647	0.0667705	-0.208418	0.682647	0.659173	-0.314874	0.305308	0.316181	1.68945e-12	-0.208933	0.374175	0.285479	6.16638e-10	3	no differential activity	TSG	TRUE
IRF1	BRAF	BRAF hotspot S602	483	6510	0.268149	-0.00879651	0.276945	0.846124	0.835401	0.331217	0.327311	0.331512	1.85481e-12	0.280356	0.178967	0.0137625	7.49199e-11	4	no differential activity	Oncogene	TRUE
ZEB1	PTEN	PTEN p.R130G	27	6484	0.833706	-0.0127853	0.846491	0.502953	0.620627	1.36486	1.68304	1.36393	1.87376e-12	0.846206	0.981848	0.976782	5.89384e-09	3	no differential activity	TSG	TRUE
IRF1	BRAF	BRAF missense	624	6510	0.236695	-0.00879651	0.245492	0.844713	0.835401	0.293574	0.290621	0.293861	1.96194e-12	0.247768	0.199156	0.0110323	7.78569e-11	4	no differential activity	Oncogene	TRUE
FOSL2	TP53	TP53 3D hotspot 97-287-1ycs	581	4377	-0.138143	0.0667705	-0.204913	0.682911	0.659173	-0.309539	0.300058	0.310864	2.50437e-12	-0.205259	0.428563	0.301704	8.91782e-10	3	no differential activity	TSG	TRUE
SP1	NRAS	NRAS p.61	159	6936	-0.39384	0.022203	-0.416043	0.903845	0.733238	-0.56415	0.460304	0.567405	2.78389e-12	-0.41475	0.915745	0.414304	2.62e-09	3	no differential activity	Oncogene	TRUE
IRF1	BRAF	BRAF hotspot T599	494	6510	0.262796	-0.00879651	0.271593	0.850508	0.835401	0.324688	0.31933	0.325105	3.02882e-12	0.274702	0.20651	0.0129196	1.18122e-10	4	no differential activity	Oncogene	TRUE
FOXM1	TP53	TP53 DNA/RNA aff. disabling	467	4377	0.114676	-0.0786171	0.193293	0.555905	0.571004	0.339368	0.347709	0.338514	3.19217e-12	0.192929	0.0352728	5.63934e-10	1.10964e-09	2	activated in tumors	TSG	TRUE
FOXM1	TP53	TP53 interface BCL2L1	418	4377	0.123006	-0.0786171	0.201623	0.550372	0.571004	0.354198	0.36634	0.353103	3.55276e-12	0.202389	0.00607739	4.49349e-11	1.20626e-09	2	activated in tumors	TSG	TRUE
EGR1	KRAS	KRAS interface ZDHHC17	400	6615	0.296269	0.00505557	0.291213	0.825035	0.843583	0.345638	0.352971	0.34521	4.05115e-12	0.302645	0.00135409	0.360573	1.25665e-09	3	deactivated in tumors	Oncogene	TRUE
E2F1	CDH1	CDH1 truncating	122	6863	-0.393707	0.0275238	-0.421231	0.782523	0.628836	-0.666698	0.538299	0.669858	4.1515e-12	-0.402768	0.0389186	0.00762772	7.78407e-10	2	activated in tumors	TSG	TRUE
SMAD3	KEAP1	KEAP1 missense	188	6941	-0.414039	0.0322439	-0.446283	0.937491	0.826651	-0.537853	0.47604	0.539869	4.72059e-12	-0.425088	0.000313925	0.000955945	1.5932e-09	3	deactivated in tumors	Oncogene	TRUE
FOSL2	TP53	TP53 DNA/RNA aff. disabling	467	4377	-0.1557	0.0667705	-0.222471	0.686872	0.659173	-0.336115	0.32389	0.3375	5.78615e-12	-0.222396	0.394302	0.274706	1.91991e-09	3	no differential activity	TSG	TRUE
ZEB1	KRAS	KRAS p.12	371	6615	0.214622	-0.0171452	0.231767	0.701956	0.621539	0.3702	0.330173	0.372892	5.85767e-12	0.231342	0.669426	0.101216	1.51419e-09	4	no differential activity	Oncogene	TRUE
FOSL2	TP53	TP53 interface PPP1R13L	587	4377	-0.13378	0.0667705	-0.200551	0.686642	0.659173	-0.302729	0.292075	0.304246	6.07988e-12	-0.200818	0.5274	0.346564	1.97254e-09	3	no differential activity	TSG	TRUE
SP1	NRAS	NRAS interface RASA1	204	6936	-0.339066	0.022203	-0.361269	0.860665	0.733238	-0.490077	0.419755	0.492703	7.16133e-12	-0.359872	0.785665	0.423618	3.36987e-09	3	no differential activity	Oncogene	TRUE
FOS	TP53	TP53 3D hotspot 96-288-2mej	501	4377	0.157176	-0.0542338	0.21141	0.669647	0.659863	0.319895	0.315703	0.320384	7.76985e-12	0.213828	0.0318001	0.0455166	2.46603e-09	2	activated in tumors	TSG	TRUE
GATA3	PIK3CA	PIK3CA missense	1097	6014	0.160773	0.0013729	0.1594	0.743158	0.692491	0.227539	0.214491	0.230184	8.03891e-12	0.159576	0.0399398	0.280699	1.07004e-08	4	deactivated in tumors	Oncogene	TRUE
IRF1	BRAF	BRAF p.600	460	6510	0.26518	-0.00879651	0.273977	0.846498	0.835401	0.32767	0.323659	0.327959	1.03314e-11	0.277055	0.186486	0.0101985	3.96088e-10	4	no differential activity	Oncogene	TRUE
EGR1	KRAS	KRAS p.12	371	6615	0.300725	0.00505557	0.295669	0.818941	0.843583	0.351028	0.361039	0.350492	1.07444e-11	0.307109	0.00126714	0.297356	2.30585e-09	3	deactivated in tumors	Oncogene	TRUE
IRF1	BRAF	BRAF activitygain	467	6510	0.263053	-0.00879651	0.27185	0.852535	0.835401	0.324963	0.318873	0.325413	1.08801e-11	0.27483	0.178531	0.0100068	4.10174e-10	4	no differential activity	Oncogene	TRUE
EGR1	KRAS	KRAS missense	543	6615	0.24947	0.00505557	0.244414	0.81682	0.843583	0.290421	0.299226	0.289733	1.18936e-11	0.256448	0.000628827	0.279442	2.30585e-09	3	deactivated in tumors	Oncogene	TRUE
E2F4	TP53	TP53 3D hotspot 97-287-1ycs	581	4377	0.134447	-0.0647709	0.199218	0.669589	0.668715	0.297865	0.297522	0.297911	1.33523e-11	0.199873	0.074552	1.03097e-05	4.14764e-09	2	activated in tumors	TSG	TRUE
IRF1	BRAF	BRAF interaction increasing MAP2K1 // BRAF p.V600E	457	6510	0.264566	-0.00879651	0.273362	0.847477	0.835401	0.326911	0.32256	0.327223	1.35812e-11	0.276351	0.183375	0.0100454	5.0361e-10	4	no differential activity	Oncogene	TRUE
SP1	NRAS	NRAS missense	221	6936	-0.319471	0.022203	-0.341674	0.856759	0.733238	-0.463385	0.398798	0.46598	1.5152e-11	-0.340665	0.810187	0.399135	4.75334e-09	3	no differential activity	Oncogene	TRUE
IRF1	BRAF	BRAF interaction disrupting MAP2K1	469	6510	0.259981	-0.00879651	0.268777	0.847563	0.835401	0.321419	0.317118	0.321735	1.62087e-11	0.271686	0.18627	0.0109304	5.91348e-10	4	no differential activity	Oncogene	TRUE
E2F4	TP53	TP53 interface TP53BP2	568	4377	0.133333	-0.0647709	0.198104	0.673843	0.668715	0.295985	0.293991	0.296246	2.5608e-11	0.199175	0.0666441	7.77776e-06	7.78895e-09	2	activated in tumors	TSG	TRUE
ATF4	PIK3CA	PIK3CA missense	1097	6014	-0.172702	0.0109602	-0.183663	0.883662	0.815221	-0.222314	0.207843	0.225292	2.72467e-11	-0.183254	0.0121274	0.135816	2.90139e-08	4	activated in tumors	Oncogene	TRUE
MYCN	TP53	TP53 truncating	800	4377	0.152657	-0.0430707	0.195728	0.768812	0.758548	0.257489	0.254585	0.25803	3.63286e-11	0.193932	0.207945	0.00027729	1.08242e-08	1	activated in tumors	TSG	TRUE
E2F4	CDH1	CDH1 truncating	122	6863	-0.412898	0.0236768	-0.436575	0.867714	0.68198	-0.636753	0.503132	0.640158	5.66171e-11	-0.412822	0.000931185	0.00271794	8.49256e-09	2	activated in tumors	TSG	TRUE
RARA	GATA3	GATA3 truncating	107	6972	-0.487969	0.000416306	-0.488385	0.8453	0.777575	-0.627234	0.577766	0.628088	5.93755e-11	-0.499512	0.355766	0.190868	3.51503e-08	2	deactivated in tumors	TSG	TRUE
FOXM1	TP53	TP53 interface TP53BP1 // TP53 3D hotspot 95-289-1kzy // TP53 3D hotspot 95-292-1gzh	353	4377	0.130227	-0.0786171	0.208844	0.534866	0.571004	0.367429	0.390461	0.365749	6.74415e-11	0.204908	0.00506262	2.72133e-12	1.96925e-08	2	activated in tumors	TSG	TRUE
ATF4	PIK3CA	PIK3CA activitygain	599	6014	-0.223274	0.0109602	-0.234235	0.918924	0.815221	-0.283873	0.254901	0.287326	7.72077e-11	-0.233133	0.0299572	0.32196	6.85127e-08	4	activated in tumors	Oncogene	TRUE
ZEB1	KRAS	KRAS missense	543	6615	0.166398	-0.0171452	0.183543	0.682453	0.621539	0.293032	0.268946	0.295305	7.99375e-11	0.183065	0.760731	0.0751618	1.37757e-08	4	no differential activity	Oncogene	TRUE
FOXM1	MAP3K1	MAP3K1 truncating	87	6974	-0.414537	0.0158452	-0.430382	0.619777	0.575474	-0.747147	0.694414	0.747874	8.60818e-11	-0.405483	0.0202544	0.000418637	1.72164e-08	3	activated in tumors	TSG	TRUE
MYC	TP53	TP53 truncating	800	4377	0.142667	-0.0372769	0.179944	0.79196	0.715004	0.247373	0.227213	0.251668	1.77148e-10	0.179008	0.324651	0.0162651	5.0712e-08	2	activated in tumors	TSG	TRUE
PPARD	TP53	TP53 missense	1991	4377	-0.0717653	0.0449838	-0.116749	0.675755	0.684973	-0.17116	0.172768	0.170443	1.95064e-10	-0.11758	0.0467245	5.67023e-05	5.47668e-08	4	deactivated in tumors	TSG	TRUE
FOSL2	PIK3CA	PIK3CA interaction increasing IRS1	426	6014	0.181186	-0.0298115	0.210997	0.68752	0.68435	0.308223	0.306896	0.308317	1.9855e-10	0.220025	0.191385	0.000840874	1.51019e-07	3	no differential activity	Oncogene	TRUE
ATF4	TP53	TP53 3D hotspot 96-290-2mej	433	4377	0.143583	-0.124476	0.26806	0.79929	0.818415	0.328217	0.335372	0.327535	2.05084e-10	0.261817	0.163578	1.7426e-06	5.64937e-08	3	activated in tumors	TSG	TRUE
ATF1	TP53	TP53 missense	1991	4377	0.0921804	-0.0329488	0.125129	0.772005	0.74829	0.165562	0.162083	0.16722	2.22773e-10	0.129715	4.99585e-07	0.00175018	6.02299e-08	2	activated in tumors	TSG	TRUE
FOSL2	TP53	TP53 hotspot S269	348	4377	-0.166794	0.0667705	-0.233564	0.659391	0.659173	-0.354321	0.354213	0.35433	2.28283e-10	-0.233355	0.961401	0.238344	6.05975e-08	3	no differential activity	TSG	TRUE
PPARG	CDH1	CDH1 truncating	122	6863	0.441402	0.00365968	0.437742	0.848483	0.744888	0.586152	0.515911	0.587661	2.32014e-10	0.435515	0.46006	0.865066	2.90018e-08	4	deactivated in tumors	TSG	TRUE
ATF4	TP53	TP53 interface BCL2	434	4377	0.142551	-0.124476	0.267027	0.799657	0.818415	0.326941	0.333927	0.326274	2.36197e-10	0.260669	0.167787	1.91796e-06	6.15787e-08	3	activated in tumors	TSG	TRUE
E2F4	TP53	TP53 interface PPP1R13L	587	4377	0.120468	-0.0647709	0.185239	0.671693	0.668715	0.276861	0.275779	0.277007	2.61701e-10	0.185886	0.0567506	7.37831e-06	6.70307e-08	2	activated in tumors	TSG	TRUE
E2F4	KEAP1	KEAP1 missense	188	6941	0.326094	0.0046639	0.32143	0.764779	0.68644	0.466782	0.420292	0.468257	3.11494e-10	0.321019	0.00042249	0.000301963	7.00862e-08	3	activated in tumors	Oncogene	TRUE
JUND	BRAF	BRAF hotspot T599	494	6510	0.174905	-0.00842751	0.183332	0.602233	0.600391	0.305288	0.304421	0.305355	3.20904e-10	0.17774	0.206407	0.0811426	1.15218e-08	3	deactivated in tumors	Oncogene	TRUE
ATF4	TP53	TP53 interface BCL2L1	418	4377	0.144017	-0.124476	0.268493	0.808077	0.818415	0.328424	0.332262	0.328065	3.37368e-10	0.26306	0.174966	2.07595e-06	8.4922e-08	3	activated in tumors	TSG	TRUE
FOS	TP53	TP53 3D hotspot 97-291-4a63	494	4377	0.141216	-0.0542338	0.19545	0.658429	0.659863	0.296262	0.296842	0.296197	3.80772e-10	0.196394	0.0534322	0.068246	9.42231e-08	2	activated in tumors	TSG	TRUE
E2F1	TP53	TP53 interface TP53	596	4377	0.125235	-0.0480138	0.173248	0.64014	0.62954	0.274641	0.270642	0.275199	4.10921e-10	0.172319	0.0605338	1.14864e-06	9.99888e-08	2	activated in tumors	TSG	TRUE
ATF4	PIK3CA	PIK3CA p.1047	246	6014	-0.329296	0.0109602	-0.340257	0.927246	0.815221	-0.415	0.366954	0.417379	4.15454e-10	-0.336951	0.0950538	0.412363	2.76499e-07	4	activated in tumors	Oncogene	TRUE
FOSL2	HRAS	HRAS 3D hotspot 5-163-2efd	47	7081	-0.623912	0.00300466	-0.626917	0.594227	0.684702	-0.916336	1.05501	0.915606	4.71959e-10	-0.624373	0.0446045	0.164053	4.38634e-07	3	no differential activity	Oncogene	TRUE
ATF4	TP53	TP53 3D hotspot 97-287-1ycs	581	4377	0.10023	-0.124476	0.224706	0.772192	0.818415	0.276343	0.290998	0.274562	4.94507e-10	0.223369	0.112833	9.45573e-06	1.18355e-07	3	activated in tumors	TSG	TRUE
SP1	BRAF	BRAF missense	624	6510	0.186291	-0.00437926	0.19067	0.762185	0.734312	0.258785	0.250162	0.259658	4.96238e-10	0.192975	0.279051	0.393211	1.75387e-08	3	no differential activity	Oncogene	TRUE
E2F4	TP53	TP53 3D hotspot 96-288-2mej	501	4377	0.129386	-0.0647709	0.194157	0.696661	0.668715	0.289081	0.278697	0.290343	5.36645e-10	0.196619	0.020391	3.11246e-07	1.26369e-07	2	activated in tumors	TSG	TRUE
GATA3	PIK3CA	PIK3CA 3D hotspot 8-1058-4l1b	547	6014	0.19298	0.0013729	0.191607	0.737166	0.692491	0.275171	0.259924	0.276693	5.9576e-10	0.194105	0.0355419	0.713826	3.23011e-07	4	deactivated in tumors	Oncogene	TRUE
ESR1	TP53	TP53 3D hotspot 97-287-1ycs	581	4377	-0.104527	0.0908228	-0.19535	0.721881	0.707762	-0.275362	0.270612	0.27601	6.03787e-10	-0.193643	0.0138752	1.03123e-07	1.37102e-07	3	deactivated in tumors	TSG	TRUE
GATA3	PIK3CA	PIK3CA 3D hotspot 8-1059-4l23	538	6014	0.194252	0.0013729	0.192879	0.739079	0.692491	0.276954	0.260972	0.278529	6.06675e-10	0.195563	0.0343151	0.741146	3.23011e-07	4	deactivated in tumors	Oncogene	TRUE
NRF1	TP53	TP53 interface TP53	596	4377	0.0978836	-0.104357	0.202241	0.825153	0.739101	0.269683	0.245095	0.273631	6.08384e-10	0.202482	0.00116505	3.97058e-09	1.37102e-07	6	activated in tumors	TSG	TRUE
LEF1	BRAF	BRAF hotspot S602	483	6510	0.233204	-0.000672568	0.233876	0.761542	0.784242	0.298808	0.307109	0.29822	6.08428e-10	0.23045	0.906653	0.0128007	2.1173e-08	3	deactivated in tumors	Oncogene	TRUE
FOXM1	TP53	TP53 3D hotspot 95-290-1gzh	333	4377	0.123071	-0.0786171	0.201688	0.53792	0.571004	0.354626	0.37494	0.353216	6.10396e-10	0.19972	0.00430839	4.59638e-12	1.37102e-07	2	activated in tumors	TSG	TRUE
SP1	NRAS	NRAS p.Q61R	82	6936	-0.486317	0.022203	-0.50852	0.939881	0.733238	-0.690966	0.541048	0.693527	6.19505e-10	-0.507175	0.861155	0.333793	1.45759e-07	3	no differential activity	Oncogene	TRUE
FOSL2	HRAS	HRAS interface RIN1	47	7081	-0.61778	0.00300466	-0.620785	0.603274	0.684702	-0.907305	1.02903	0.90665	7.033e-10	-0.61808	0.0425334	0.173482	4.38634e-07	3	no differential activity	Oncogene	TRUE
FOS	TP53	TP53 3D hotspot 97-287-1ycs	581	4377	0.125104	-0.0542338	0.179338	0.67226	0.659863	0.271179	0.266769	0.27178	7.44468e-10	0.18009	0.097315	0.0930117	1.63418e-07	2	activated in tumors	TSG	TRUE
NRF1	TP53	TP53 hotspot S269	348	4377	0.152984	-0.104357	0.257341	0.811062	0.739101	0.345599	0.31729	0.348182	7.49949e-10	0.254855	0.0132715	8.57301e-09	1.63418e-07	6	activated in tumors	TSG	TRUE
ESR1	TP53	TP53 interface TP53BP2	568	4377	-0.105515	0.0908228	-0.196338	0.735337	0.707762	-0.276151	0.267004	0.277406	7.70414e-10	-0.194803	0.0138737	1.16849e-07	1.65409e-07	3	deactivated in tumors	TSG	TRUE
GATA3	PIK3CA	PIK3CA 3D hotspot 8-1053-4l2y	547	6014	0.191389	0.0013729	0.190016	0.740442	0.692491	0.272773	0.256625	0.274395	8.60132e-10	0.192338	0.0362359	0.669698	4.16327e-07	4	deactivated in tumors	Oncogene	TRUE
ATF4	TP53	TP53 interface TP53BP2	568	4377	0.0985594	-0.124476	0.223036	0.770565	0.818415	0.274313	0.289444	0.272522	9.27963e-10	0.221966	0.134583	5.90404e-06	1.93327e-07	3	activated in tumors	TSG	TRUE
FOXM1	TP53	TP53 Stability uniprot = D	218	4377	0.163373	-0.0786171	0.24199	0.559765	0.571004	0.424188	0.432306	0.423797	9.33086e-10	0.241538	0.00367786	1.38732e-11	1.93327e-07	2	activated in tumors	TSG	TRUE
ATF4	TP53	TP53 interface TP53	596	4377	0.100494	-0.124476	0.224971	0.792036	0.818415	0.275935	0.284041	0.274886	9.40169e-10	0.217985	0.208916	2.43519e-07	1.93327e-07	3	activated in tumors	TSG	TRUE
MAX	TP53	TP53 truncating	800	4377	0.135275	-0.0484045	0.18368	0.828933	0.75047	0.240698	0.221586	0.244753	9.72469e-10	0.179899	0.41042	0.00644575	1.97191e-07	2	activated in tumors	TSG	TRUE
JUND	BRAF	BRAF interaction disrupting MAP2K1	469	6510	0.173908	-0.00842751	0.182336	0.595866	0.600391	0.303848	0.306001	0.303695	9.78377e-10	0.176906	0.283758	0.0664441	3.35312e-08	3	deactivated in tumors	Oncogene	TRUE
JUND	BRAF	BRAF p.600	460	6510	0.175298	-0.00842751	0.183726	0.592371	0.600391	0.306278	0.310153	0.30601	1.15419e-09	0.177846	0.279607	0.0639045	3.89663e-08	3	deactivated in tumors	Oncogene	TRUE
JUND	BRAF	BRAF interaction increasing MAP2K1 // BRAF p.V600E	457	6510	0.175823	-0.00842751	0.184251	0.593866	0.600391	0.307102	0.310257	0.306885	1.20611e-09	0.178245	0.2813	0.0646026	4.01204e-08	3	deactivated in tumors	Oncogene	TRUE
FOS	TP53	TP53 interface PPP1R13L	587	4377	0.121442	-0.0542338	0.175676	0.657347	0.659863	0.26635	0.26725	0.266231	1.2116e-09	0.176524	0.0699802	0.069533	2.42315e-07	2	activated in tumors	TSG	TRUE
GATA3	PIK3CA	PIK3CA 3D hotspot 2-1061-4jps	543	6014	0.18969	0.0013729	0.188317	0.744207	0.692491	0.270216	0.253044	0.271941	1.27204e-09	0.191201	0.0383544	0.779304	5.64392e-07	4	deactivated in tumors	Oncogene	TRUE
FOSL2	PIK3CA	PIK3CA p.1047	246	6014	0.224497	-0.0298115	0.254308	0.695926	0.68435	0.371357	0.365424	0.371605	1.39911e-09	0.272456	0.0481368	0.000567229	5.73021e-07	3	no differential activity	Oncogene	TRUE
FOS	TP53	TP53 interface TP53BP2	568	4377	0.123273	-0.0542338	0.177507	0.668638	0.659863	0.268593	0.265475	0.269005	1.46933e-09	0.178549	0.0716668	0.0745243	2.89889e-07	2	activated in tumors	TSG	TRUE
E2F7	CDH1	CDH1 truncating	122	6863	-0.340491	0.0223992	-0.36289	0.762157	0.621009	-0.58181	0.476136	0.584356	1.48186e-09	-0.346694	0.022998	0.022256	1.58771e-07	3	activated in tumors	TSG	TRUE
SPI1	BRAF	BRAF hotspot S602	483	6510	0.198511	-0.0106876	0.209199	0.881115	0.760389	0.271927	0.237425	0.275121	1.50449e-09	0.221103	0.00150119	0.0584984	4.93205e-08	3	activated in tumors	Oncogene	TRUE
E2F4	MSH6	MSH6 p.T1085fs // MSH6 p.T783fs // MSH6 p.T955fs	26	7000	0.78989	0.00747326	0.782416	0.52835	0.68896	1.13648	1.48087	1.13565	1.51017e-09	0.818069	0.000156575	4.73684e-05	2.83156e-07	2	activated in tumors	TSG	TRUE
YY1	KEAP1	KEAP1 missense	188	6941	0.361737	-0.00186475	0.363602	0.844052	0.792708	0.457881	0.430782	0.458684	1.56422e-09	0.355555	0.942608	0.00545662	2.63962e-07	4	activated in tumors	Oncogene	TRUE
LEF1	BRAF	BRAF p.600	460	6510	0.233881	-0.000672568	0.234553	0.766197	0.784242	0.299532	0.306127	0.299083	1.5739e-09	0.230233	0.826311	0.0149996	5.07026e-08	3	deactivated in tumors	Oncogene	TRUE
JUND	BRAF	BRAF activitygain	467	6510	0.172777	-0.00842751	0.181204	0.602506	0.600391	0.301739	0.300751	0.30181	1.59148e-09	0.175217	0.24438	0.0717398	5.07026e-08	3	deactivated in tumors	Oncogene	TRUE
LEF1	BRAF	BRAF hotspot T599	494	6510	0.224838	-0.000672568	0.22551	0.766768	0.784242	0.287999	0.294105	0.287552	1.73126e-09	0.221861	0.808342	0.012137	5.43896e-08	3	deactivated in tumors	Oncogene	TRUE
GATA3	PIK3CA	PIK3CA interface PIK3R3	573	6014	0.183546	0.0013729	0.182173	0.741495	0.692491	0.261411	0.245684	0.263069	1.89922e-09	0.184534	0.048112	0.686206	7.22283e-07	4	deactivated in tumors	Oncogene	TRUE
GATA3	PIK3CA	PIK3CA 3D hotspot 5-1062-3hiz	519	6014	0.190472	0.0013729	0.189099	0.740542	0.692491	0.271529	0.255352	0.273071	2.15606e-09	0.192285	0.0341456	0.790149	7.65298e-07	4	deactivated in tumors	Oncogene	TRUE
LEF1	BRAF	BRAF interaction increasing MAP2K1 // BRAF p.V600E	457	6510	0.232872	-0.000672568	0.233544	0.766807	0.784242	0.298226	0.304567	0.297796	2.16331e-09	0.229013	0.824839	0.01463	6.70318e-08	3	deactivated in tumors	Oncogene	TRUE
MAX	KEAP1	KEAP1 missense	188	6941	0.34862	-0.00543532	0.354055	0.787716	0.771036	0.458931	0.44947	0.459194	2.16377e-09	0.342312	0.444278	0.000902458	2.92108e-07	4	activated in tumors	Oncogene	TRUE
FOS	MAP3K1	MAP3K1 truncating	87	6974	-0.414827	0.02419	-0.439017	0.735631	0.673158	-0.651405	0.59679	0.652175	2.22947e-09	-0.437458	0.0357683	0.690785	3.3442e-07	2	activated in tumors	TSG	TRUE
SPI1	BRAF	BRAF hotspot T599	494	6510	0.193716	-0.0106876	0.204403	0.87808	0.760389	0.265713	0.232785	0.268814	2.50001e-09	0.215695	0.00192889	0.0574244	7.6418e-08	3	activated in tumors	Oncogene	TRUE
ZEB1	PTEN	PTEN p.130	70	6484	0.435848	-0.0127853	0.448633	0.729156	0.620627	0.721427	0.615277	0.72287	2.60105e-09	0.446787	0.809988	0.752432	4.09076e-06	3	no differential activity	TSG	TRUE
LEF1	BRAF	BRAF activitygain	467	6510	0.228851	-0.000672568	0.229523	0.769851	0.784242	0.293025	0.29814	0.292669	2.74444e-09	0.225148	0.828374	0.0118116	8.2771e-08	3	deactivated in tumors	Oncogene	TRUE
LEF1	BRAF	BRAF interaction disrupting MAP2K1	469	6510	0.227911	-0.000672568	0.228584	0.770408	0.784242	0.291814	0.296705	0.291471	2.78296e-09	0.224502	0.812721	0.0156675	8.28286e-08	3	deactivated in tumors	Oncogene	TRUE
FOSL2	PIK3CA	PIK3CA 3D hotspot 5-1062-3hhm	513	6014	0.151245	-0.0298115	0.181057	0.667874	0.68435	0.265063	0.271094	0.264568	2.95157e-09	0.187905	0.153606	0.00286743	9.34433e-07	3	no differential activity	Oncogene	TRUE
E2F1	NR4A2	NR4A2 missense	68	7068	0.463927	0.0123735	0.451554	0.637232	0.634472	0.711671	0.708618	0.7117	3.0489e-09	0.458574	0.0247912	0.000211576	1.82934e-06	3	activated in tumors	TSG	TRUE
ESR1	PIK3CA	PIK3CA activitygain	599	6014	0.191057	-0.00138062	0.192437	0.838797	0.735214	0.258244	0.229421	0.261743	3.09831e-09	0.191792	0.254058	0.584579	9.34433e-07	2	deactivated in tumors	Oncogene	TRUE
NRF1	PIK3CA	PIK3CA activitygain	599	6014	-0.204965	0.016687	-0.221652	0.821139	0.773603	-0.284891	0.269932	0.286519	3.15907e-09	-0.199885	0.0110579	0.000330694	9.34433e-07	5	activated in tumors	Oncogene	TRUE
STAT2	MSH6	MSH6 p.T1085fs // MSH6 p.T783fs // MSH6 p.T955fs	26	7000	0.979059	-0.00117013	0.980229	0.997449	0.826219	1.18544	0.982735	1.1864	3.18401e-09	0.964273	0.371803	0.00778699	3.73488e-07	4	activated in tumors	TSG	TRUE
FOSL2	HRAS	HRAS 3D hotspot 1-166-1bkd	72	7081	-0.475015	0.00300466	-0.47802	0.629705	0.684702	-0.698678	0.759117	0.698143	3.23235e-09	-0.480183	0.038526	0.146398	8.82482e-07	3	no differential activity	Oncogene	TRUE
GABPA	TP53	TP53 missense	1991	4377	0.0702449	-0.0556262	0.125871	0.801081	0.759521	0.162887	0.157127	0.165724	3.27251e-09	0.123938	0.28237	0.030496	6.37035e-07	4	activated in tumors	TSG	TRUE
FOSL2	HRAS	HRAS 3D hotspot 1-166-1wq1	69	7081	-0.48508	0.00300466	-0.488085	0.64068	0.684702	-0.713265	0.761824	0.712843	3.29434e-09	-0.490228	0.0372702	0.148899	8.82482e-07	3	no differential activity	Oncogene	TRUE
GATA3	PIK3CA	PIK3CA interface PIK3R1	580	6014	0.17958	0.0013729	0.178207	0.739951	0.692491	0.255754	0.240836	0.257341	3.38939e-09	0.180542	0.0477372	0.658745	9.49794e-07	4	deactivated in tumors	Oncogene	TRUE
FOSL2	PIK3CA	PIK3CA interface PIK3R3	573	6014	0.141891	-0.0298115	0.171702	0.676509	0.68435	0.251147	0.253806	0.250898	3.79133e-09	0.17752	0.115595	0.00407222	1.00931e-06	3	no differential activity	Oncogene	TRUE
E2F4	MSH6	MSH6 truncating	61	7000	0.510023	0.00747326	0.50255	0.667378	0.68896	0.729624	0.753022	0.729433	3.98387e-09	0.521472	0.000387691	4.72023e-05	3.73488e-07	2	activated in tumors	TSG	TRUE
E2F4	TP53	TP53 3D hotspot 97-291-4a63	494	4377	0.120329	-0.0647709	0.1851	0.660175	0.668715	0.277155	0.28038	0.276799	4.03982e-09	0.186395	0.0505923	3.89092e-06	7.76055e-07	2	activated in tumors	TSG	TRUE
FOSL2	HRAS	HRAS interface SOS2	69	7081	-0.482539	0.00300466	-0.485544	0.645321	0.684702	-0.709509	0.752407	0.709132	4.08341e-09	-0.487306	0.0366978	0.156663	8.82482e-07	3	no differential activity	Oncogene	TRUE
FOSL2	HRAS	HRAS interface RASGRF1 // HRAS 3D hotspot 1-166-1xd2 // HRAS 3D hotspot 1-166-4nyi	70	7081	-0.47825	0.00300466	-0.481255	0.641632	0.684702	-0.703282	0.750048	0.702868	4.24489e-09	-0.483295	0.0365014	0.15526	8.82482e-07	3	no differential activity	Oncogene	TRUE
GATA3	PIK3CA	PIK3CA interaction increasing IRS1	426	6014	0.204523	0.0013729	0.20315	0.747404	0.692491	0.291778	0.271808	0.293362	4.76144e-09	0.206034	0.0350836	0.737659	1.2072e-06	4	deactivated in tumors	Oncogene	TRUE
LEF1	BRAF	BRAF missense	624	6510	0.194761	-0.000672568	0.195434	0.784562	0.784242	0.249192	0.249099	0.249201	4.81383e-09	0.193192	0.741248	0.00710558	1.41412e-07	3	deactivated in tumors	Oncogene	TRUE
ESR1	TP53	TP53 interface PPP1R13L	587	4377	-0.0933934	0.0908228	-0.184216	0.72006	0.707762	-0.259743	0.255835	0.26028	4.87325e-09	-0.182139	0.0129293	6.17787e-08	9.24001e-07	3	deactivated in tumors	TSG	TRUE
SPI1	BRAF	BRAF missense	624	6510	0.17148	-0.0106876	0.182168	0.866564	0.760389	0.236505	0.210218	0.239572	5.2218e-09	0.189231	0.0022313	0.0590586	1.5143e-07	3	activated in tumors	Oncogene	TRUE
PAX6	SMARCA4	SMARCA4 truncating	30	6895	-0.752943	0.0151993	-0.768142	0.878357	0.716061	-1.0716	0.874521	1.07273	5.25333e-09	-0.766541	0.0173238	0.316472	2.758e-06	5	deactivated in tumors	TSG	TRUE
FOSL2	HRAS	HRAS 3D hotspot 1-166-4nyj	69	7081	-0.478762	0.00300466	-0.481766	0.646319	0.684702	-0.70398	0.7454	0.703615	5.28335e-09	-0.483765	0.036572	0.155146	9.22524e-07	3	no differential activity	Oncogene	TRUE
ETS1	KEAP1	KEAP1 missense	188	6941	0.347387	-0.00786647	0.355253	0.889692	0.798639	0.443423	0.399299	0.444823	5.29035e-09	0.34684	0.807775	0.0102331	5.95165e-07	5	activated in tumors	Oncogene	TRUE
JUND	BRAF	BRAF hotspot S602	483	6510	0.163813	-0.00842751	0.17224	0.59732	0.600391	0.286981	0.288355	0.28688	5.37426e-09	0.166622	0.244803	0.0736261	1.53878e-07	3	deactivated in tumors	Oncogene	TRUE
JUND	BRAF	BRAF missense	624	6510	0.142892	-0.00842751	0.151319	0.610482	0.600391	0.251662	0.247868	0.252034	5.48683e-09	0.147583	0.132919	0.0862037	1.55138e-07	3	deactivated in tumors	Oncogene	TRUE
CEBPB	TP53	TP53 missense	1991	4377	-0.0670364	0.0526016	-0.119638	0.77809	0.779406	-0.15358	0.153759	0.153499	5.61774e-09	-0.123013	0.00252474	0.782746	1.0515e-06	3	deactivated in tumors	TSG	TRUE
FOSL2	HRAS	HRAS interface SOS1 // HRAS 3D hotspot 1-166-1nvu // HRAS 3D hotspot 1-166-1nvv	73	7081	-0.463195	0.00300466	-0.466199	0.633419	0.684702	-0.681374	0.736004	0.680879	6.10734e-09	-0.468408	0.0371786	0.150893	9.22524e-07	3	no differential activity	Oncogene	TRUE
PPARA	NFE2L2	NFE2L2 missense	175	6974	0.328989	-0.0178401	0.346829	0.732853	0.791576	0.438914	0.473259	0.43815	6.22463e-09	0.35275	0.0310745	0.330605	8.69714e-06	3	deactivated in tumors	Oncogene	TRUE
SPI1	BRAF	BRAF activitygain	467	6510	0.193604	-0.0106876	0.204291	0.888317	0.760389	0.265452	0.229976	0.268667	6.61906e-09	0.215673	0.0021356	0.0473682	1.84841e-07	3	activated in tumors	Oncogene	TRUE
FOSL2	HRAS	HRAS interface NF1	70	7081	-0.471953	0.00300466	-0.474958	0.645433	0.684702	-0.694045	0.735875	0.693671	6.65624e-09	-0.477137	0.0359848	0.153696	9.22524e-07	3	no differential activity	Oncogene	TRUE
FOSL2	PIK3CA	PIK3CA interface PIK3R1	580	6014	0.13827	-0.0298115	0.168081	0.678978	0.68435	0.245776	0.24755	0.245607	6.81578e-09	0.173616	0.122894	0.00406501	1.64951e-06	3	no differential activity	Oncogene	TRUE
FOSL2	GATA3	GATA3 truncating	107	6972	0.364218	-0.0083428	0.372561	0.573817	0.686251	0.54412	0.649268	0.542893	6.88909e-09	0.388516	0.0353179	0.0487666	2.03917e-06	3	no differential activity	TSG	TRUE
SPI1	BRAF	BRAF interaction increasing MAP2K1 // BRAF p.V600E	457	6510	0.194766	-0.0106876	0.205454	0.884189	0.760389	0.267134	0.232364	0.270195	7.15248e-09	0.217361	0.00210357	0.0501024	1.97301e-07	3	activated in tumors	Oncogene	TRUE
SPI1	BRAF	BRAF p.600	460	6510	0.19343	-0.0106876	0.204118	0.882057	0.760389	0.265434	0.231411	0.268438	7.95125e-09	0.215961	0.00215898	0.0487287	2.16692e-07	3	activated in tumors	Oncogene	TRUE
ELK1	KEAP1	KEAP1 missense	188	6941	0.300689	-0.00557455	0.306263	0.82722	0.710619	0.428987	0.370232	0.430981	7.96796e-09	0.305498	0.222126	0.138173	7.68339e-07	4	activated in tumors	Oncogene	TRUE
E2F4	NR4A2	NR4A2 missense	68	7068	0.48175	0.00832772	0.473422	0.705146	0.68846	0.687495	0.671382	0.687654	8.33707e-09	0.483288	0.000643103	4.11355e-05	2.50112e-06	3	activated in tumors	TSG	TRUE
GATA3	PIK3CA	PIK3CA 3D hotspot 5-1062-3hhm	513	6014	0.184732	0.0013729	0.183359	0.747146	0.692491	0.263094	0.245413	0.264782	8.39593e-09	0.186184	0.0400254	0.747258	1.91845e-06	4	deactivated in tumors	Oncogene	TRUE
MYCN	TP53	TP53 missense	1991	4377	0.074441	-0.0430707	0.117512	0.741839	0.758548	0.155982	0.158406	0.154917	8.44721e-09	0.117458	0.220508	1.0159e-05	1.5611e-06	1	activated in tumors	TSG	TRUE
ATF4	PIK3CA	PIK3CA p.H1047R	208	6014	-0.327235	0.0109602	-0.338195	0.926381	0.815221	-0.412854	0.365071	0.41485	8.64768e-09	-0.335891	0.0917597	0.496294	1.91845e-06	4	activated in tumors	Oncogene	TRUE
FOS	TP53	TP53 DNA/RNA aff. disabling	467	4377	0.130273	-0.0542338	0.184507	0.636506	0.659863	0.280554	0.289875	0.279614	8.82708e-09	0.184401	0.0658893	0.117404	1.61091e-06	2	activated in tumors	TSG	TRUE
ESR1	PIK3CA	PIK3CA missense	1097	6014	0.142526	-0.00138062	0.143907	0.792545	0.735214	0.193334	0.181575	0.195734	9.13941e-09	0.142432	0.177447	0.239958	1.94643e-06	2	deactivated in tumors	Oncogene	TRUE
ESR1	BRAF	BRAF p.600	460	6510	0.220667	0.00976576	0.210901	0.631314	0.749981	0.283947	0.334067	0.281208	9.33573e-09	0.207747	0.861189	0.0642276	2.51394e-07	3	deactivated in tumors	Oncogene	TRUE
ESR1	BRAF	BRAF interaction increasing MAP2K1 // BRAF p.V600E	457	6510	0.221243	0.00976576	0.211478	0.63194	0.749981	0.284693	0.334648	0.281977	9.62684e-09	0.208252	0.87149	0.0648212	2.56183e-07	3	deactivated in tumors	Oncogene	TRUE
ESR1	BRAF	BRAF interaction disrupting MAP2K1	469	6510	0.218034	0.00976576	0.208268	0.634853	0.749981	0.280376	0.328057	0.277698	9.78035e-09	0.205414	0.865311	0.071879	2.57242e-07	3	deactivated in tumors	Oncogene	TRUE
HNF1A	NFE2L2	NFE2L2 missense	175	6974	0.221106	-0.00731328	0.228419	0.490937	0.504711	0.452871	0.465271	0.452574	9.81119e-09	0.222193	0.0496209	0.396875	8.69714e-06	2	deactivated in tumors	Oncogene	TRUE
MYCN	EGFR	EGFR interaction decreasing LAT // EGFR interaction decreasing ACTN4 // EGFR interaction decreasing ABL1 // EGFR interaction decreasing TGFA // EGFR interaction decreasing RAF1 // EGFR interaction decreasing NR3C1 // EGFR interaction decreasing ITGB2 // EGFR interaction decreasing RET // EGFR interaction decreasing HSP90AB1 // EGFR interaction decreasing FGR // EGFR interaction decreasing PIM1 //…	22	6797	-0.925384	0.0182697	-0.943654	0.721079	0.75503	-1.24999	1.30867	1.24982	1.00459e-08	-0.924877	0.0938994	0.00270034	4.42017e-05	2	activated in tumors	Oncogene	TRUE
SPI1	BRAF	BRAF interaction disrupting MAP2K1	469	6510	0.190617	-0.0106876	0.201304	0.879041	0.760389	0.261801	0.229004	0.264738	1.01058e-08	0.212284	0.00231552	0.0519715	2.62747e-07	3	activated in tumors	Oncogene	TRUE
ATF4	TP53	TP53 DNA/RNA aff. disabling	467	4377	0.103042	-0.124476	0.227519	0.781799	0.818415	0.279177	0.291019	0.277999	1.02173e-08	0.227154	0.149133	1.56801e-05	1.83354e-06	3	activated in tumors	TSG	TRUE
LEF1	STK11	STK11 truncating	61	7032	-0.562592	0.0230802	-0.585672	0.91153	0.783468	-0.746422	0.642516	0.747538	1.02573e-08	-0.578409	0.341033	0.00836675	8.23812e-06	4	deactivated in tumors	TSG	TRUE
FOXM1	TP53	TP53 hotspot S269	348	4377	0.104713	-0.0786171	0.18333	0.567628	0.571004	0.321205	0.322976	0.321066	1.02982e-08	0.181678	0.0609261	3.40748e-09	1.83354e-06	2	activated in tumors	TSG	TRUE
FOSL2	HRAS	HRAS interface RASA1	69	7081	-0.468982	0.00300466	-0.471986	0.649679	0.684702	-0.689658	0.726492	0.689331	1.0512e-08	-0.474175	0.0357821	0.154851	1.31123e-06	3	no differential activity	Oncogene	TRUE
FOS	TP53	TP53 interface BCL2	434	4377	0.134436	-0.0542338	0.18867	0.666886	0.659863	0.285648	0.282912	0.285923	1.07332e-08	0.190546	0.0451025	0.0427848	1.88797e-06	2	activated in tumors	TSG	TRUE
FOSL2	PIK3CA	PIK3CA 3D hotspot 2-1061-4jps	543	6014	0.139922	-0.0298115	0.169733	0.674709	0.68435	0.248309	0.251565	0.248021	1.09169e-08	0.176442	0.132585	0.00271811	2.23556e-06	3	no differential activity	Oncogene	TRUE
PBX1	GATA3	GATA3 truncating	107	6972	-0.330998	0.0137595	-0.344758	0.673623	0.658575	-0.52331	0.511797	0.523491	1.16706e-08	-0.367837	0.0102198	0.00176835	2.303e-06	4	deactivated in tumors	TSG	TRUE
NR3C1	KRAS	KRAS interface ZDHHC17	400	6615	0.226714	0.000611218	0.226103	0.91982	0.784239	0.285276	0.245812	0.288309	1.18488e-08	0.234033	0.023474	0.690417	1.83772e-06	4	deactivated in tumors	Oncogene	TRUE
E2F7	TP53	TP53 interface TP53	596	4377	0.113218	-0.0438711	0.157089	0.61463	0.63579	0.24805	0.255583	0.247076	1.22117e-08	0.157755	0.015032	0.000218073	2.12247e-06	3	activated in tumors	TSG	TRUE
IRF1	CASP8	CASP8 missense	92	7006	0.506874	0.00240582	0.504469	1.07516	0.833077	0.60298	0.469202	0.605548	1.22362e-08	0.500959	0.811729	0.0163861	5.85761e-06	1	no differential activity	TSG	TRUE
FOS	TP53	TP53 3D hotspot 96-290-2mej	433	4377	0.133617	-0.0542338	0.187851	0.668569	0.659863	0.284343	0.280975	0.284682	1.28859e-08	0.18974	0.0448041	0.0422709	2.2133e-06	2	activated in tumors	TSG	TRUE
FOSL2	PIK3CA	PIK3CA 3D hotspot 5-1062-3hiz	519	6014	0.142704	-0.0298115	0.172516	0.675102	0.68435	0.252356	0.25554	0.252087	1.28871e-08	0.179228	0.139556	0.00235298	2.54129e-06	3	no differential activity	Oncogene	TRUE
MYC	KEAP1	KEAP1 missense	188	6941	0.308198	-0.00169667	0.309894	0.816992	0.73058	0.422788	0.379311	0.424176	1.30069e-08	0.308953	0.0234585	0.0103784	1.09745e-06	3	activated in tumors	Oncogene	TRUE
STAT2	CASP8	CASP8 missense	92	7006	0.494151	-0.00672616	0.500877	1.1103	0.823964	0.604732	0.451118	0.607887	1.30169e-08	0.494987	0.335602	0.0122645	5.85761e-06	3	activated in tumors	TSG	TRUE
NRF1	TP53	TP53 p.175	118	4377	0.282533	-0.104357	0.386891	0.896339	0.739101	0.520282	0.431634	0.523461	1.32768e-08	0.393167	0.00178633	2.44724e-09	2.25393e-06	6	activated in tumors	TSG	TRUE
GABPA	TP53	TP53 truncating	800	4377	0.116332	-0.0556262	0.171958	0.837124	0.759521	0.22274	0.205415	0.226403	1.46106e-08	0.168688	0.255013	0.0866593	2.45184e-06	4	activated in tumors	TSG	TRUE
E2F1	NCOR2	NCOR2 missense	99	6980	0.374507	0.0111309	0.363376	0.602975	0.635413	0.572268	0.602639	0.571873	1.53465e-08	0.363905	0.0177897	0.000493463	9.20791e-06	2	activated in tumors	Oncogene	TRUE
SOX2	TSC1	TSC1 truncating	27	7062	-0.802696	-0.00298437	-0.799711	0.714731	0.734002	-1.08963	1.1189	1.08952	1.59535e-08	-0.800814	0.223759	0.0235246	3.58953e-06	5	deactivated in tumors	TSG	TRUE
FOS	TP53	TP53 interface BCL2L1	418	4377	0.135362	-0.0542338	0.189596	0.673333	0.659863	0.286812	0.281578	0.287326	1.59712e-08	0.191648	0.042805	0.0399523	2.63002e-06	2	activated in tumors	TSG	TRUE
ATF4	TP53	TP53 interface PPP1R13L	587	4377	0.0789534	-0.124476	0.20343	0.769894	0.818415	0.250272	0.264231	0.248565	1.60326e-08	0.201809	0.122277	6.16145e-06	2.63002e-06	3	activated in tumors	TSG	TRUE
ATF1	TP53	TP53 truncating	800	4377	0.127593	-0.0329488	0.160542	0.806663	0.74829	0.21191	0.19902	0.214545	1.8963e-08	0.163944	3.02678e-05	0.0174211	3.07616e-06	2	activated in tumors	TSG	TRUE
NRF1	PIK3CA	PIK3CA interaction increasing IRS1	426	6014	-0.222727	0.016687	-0.239414	0.796804	0.773603	-0.30886	0.300468	0.30948	1.96011e-08	-0.219724	0.0120588	0.0002405	3.72721e-06	5	activated in tumors	Oncogene	TRUE
EGR1	KRAS	KRAS interaction decreasing RASSF2 // KRAS interaction disrupting RASSF2 // KRAS p.G12V	112	6615	0.445487	0.00505557	0.440431	0.827467	0.843583	0.522259	0.532265	0.522096	1.9932e-08	0.45191	0.000364463	0.372724	2.81037e-06	3	deactivated in tumors	Oncogene	TRUE
MYB	CTNNB1	CTNNB1 interface HLA-A	154	6783	0.340271	-0.0120939	0.352365	0.787131	0.765796	0.459842	0.447657	0.460129	2.02896e-08	0.350784	0.208054	0.981311	5.05836e-05	4	deactivated in tumors	Oncogene	TRUE
MYCN	MAP3K1	MAP3K1 truncating	87	6974	-0.465525	0.0197368	-0.485262	0.719736	0.757631	-0.64088	0.674222	0.640499	2.05997e-08	-0.460576	0.113197	0.00673851	2.47197e-06	4	activated in tumors	TSG	TRUE
EGR1	BRAF	BRAF interaction disrupting MAP2K1	469	6510	0.244987	0.00551929	0.239468	0.873661	0.838833	0.284669	0.274097	0.285477	2.06487e-08	0.227371	0.0256325	0.303417	5.30757e-07	3	deactivated in tumors	Oncogene	TRUE
ESR1	CDH1	CDH1 truncating	122	6863	0.404868	0.0140675	0.390801	0.786168	0.743969	0.524761	0.497096	0.525291	2.07159e-08	0.383922	0.258624	0.234876	1.94211e-06	3	deactivated in tumors	TSG	TRUE
EGR1	BRAF	BRAF interaction increasing MAP2K1 // BRAF p.V600E	457	6510	0.248877	0.00551929	0.243358	0.880607	0.838833	0.28915	0.276352	0.290115	2.09422e-08	0.230422	0.028494	0.315852	5.32253e-07	3	deactivated in tumors	Oncogene	TRUE
NRF1	TP53	TP53 interaction increasing VRK1 // TP53 p.R175H	108	4377	0.291491	-0.104357	0.395849	0.893758	0.739101	0.532651	0.442903	0.535581	2.13119e-08	0.40435	0.00195701	1.6211e-09	3.4192e-06	6	activated in tumors	TSG	TRUE
GATA3	PIK3CA	PIK3CA p.H1047R	208	6014	0.274154	0.0013729	0.272781	0.801888	0.692491	0.391697	0.340173	0.393913	2.14643e-08	0.277775	0.0208533	0.782835	3.94076e-06	4	deactivated in tumors	Oncogene	TRUE
MYB	CTNNB1	CTNNB1 hotspot S33	155	6783	0.338474	-0.0120939	0.350567	0.784891	0.765796	0.457525	0.446645	0.457782	2.1517e-08	0.349018	0.207449	0.978226	5.05836e-05	4	deactivated in tumors	Oncogene	TRUE
MYB	CTNNB1	CTNNB1 interface FBXW11	155	6783	0.338474	-0.0120939	0.350567	0.784891	0.765796	0.457525	0.446645	0.457782	2.1517e-08	0.349018	0.207449	0.978226	5.05836e-05	4	deactivated in tumors	Oncogene	TRUE
FOSL2	HRAS	HRAS missense	78	7081	-0.430026	0.00300466	-0.43303	0.629681	0.684702	-0.632962	0.687699	0.632437	2.26714e-08	-0.435806	0.0354156	0.152164	2.57085e-06	3	no differential activity	Oncogene	TRUE
PPARD	TP53	TP53 truncating	800	4377	-0.103932	0.0449838	-0.148916	0.714063	0.684973	-0.215963	0.208547	0.217404	2.32398e-08	-0.148461	0.119784	0.00654582	3.68798e-06	4	deactivated in tumors	TSG	TRUE
EGR1	BRAF	BRAF p.600	460	6510	0.247153	0.00551929	0.241634	0.879331	0.838833	0.287126	0.274793	0.28806	2.3592e-08	0.228809	0.0275252	0.310236	5.92937e-07	3	deactivated in tumors	Oncogene	TRUE
EGR1	KRAS	KRAS activitygain	114	6615	0.437479	0.00505557	0.432423	0.8226	0.843583	0.512815	0.525679	0.512603	2.56296e-08	0.444457	0.000356802	0.364533	3.31258e-06	3	deactivated in tumors	Oncogene	TRUE
FOSL2	TP53	TP53 interface BCL2	434	4377	-0.118105	0.0667705	-0.184876	0.680494	0.659173	-0.27964	0.271679	0.280466	2.57906e-08	-0.185808	0.407877	0.556631	4.04876e-06	3	no differential activity	TSG	TRUE
FOSL2	PIK3CA	PIK3CA 3D hotspot 8-1059-4l23	538	6014	0.135501	-0.0298115	0.165312	0.674075	0.68435	0.241856	0.245243	0.241561	2.79496e-08	0.172103	0.133379	0.00258823	4.96039e-06	3	no differential activity	Oncogene	TRUE
MYCN	EGFR	EGFR activitygain	33	6797	-0.730728	0.0182697	-0.748998	0.912904	0.75503	-0.99094	0.820456	0.992012	2.9279e-08	-0.732411	0.0902888	0.00301497	6.44134e-05	2	activated in tumors	Oncogene	TRUE
FOSL2	TP53	TP53 3D hotspot 96-290-2mej	433	4377	-0.11759	0.0667705	-0.18436	0.682317	0.659173	-0.278791	0.270198	0.279684	2.95323e-08	-0.185249	0.415202	0.531643	4.58684e-06	3	no differential activity	TSG	TRUE
ESR1	TP53	TP53 p.G108fs	6	4377	-1.46299	0.0908228	-1.55382	1.09229	0.707762	-2.19366	1.42253	2.19539	3.07409e-08	-1.59868	0.0662822	2.58417e-09	4.7243e-06	3	deactivated in tumors	TSG	TRUE
ELK1	TP53	TP53 truncating	800	4377	0.11029	-0.0391416	0.149431	0.774927	0.687613	0.212925	0.192833	0.217319	3.17224e-08	0.149751	0.489383	0.534444	4.82434e-06	3	activated in tumors	TSG	TRUE
E2F4	ATM	ATM missense	359	6712	0.201428	0.00308719	0.198341	0.725922	0.685853	0.288312	0.273226	0.289188	3.18393e-08	0.206471	0.000144647	6.82768e-05	3.10433e-05	1	activated in tumors	TSG	TRUE
NRF1	PIK3CA	PIK3CA 3D hotspot 5-1062-3hhm	513	6014	-0.201448	0.016687	-0.218135	0.805636	0.773603	-0.281042	0.270761	0.281972	3.18467e-08	-0.19883	0.00783811	0.000144182	5.46971e-06	5	activated in tumors	Oncogene	TRUE
CREB1	NRAS	NRAS p.61	159	6936	0.39624	0.00492123	0.391318	0.860115	0.859242	0.455413	0.45496	0.455423	3.21922e-08	0.381941	0.0335613	0.140564	6.0594e-06	4	activated in tumors	Oncogene	TRUE
E2F4	TP53	TP53 DNA/RNA aff. disabling	467	4377	0.11494	-0.0647709	0.179711	0.661801	0.668715	0.269007	0.271548	0.26874	3.40672e-08	0.179411	0.0547481	1.34184e-05	5.12754e-06	2	activated in tumors	TSG	TRUE
ATF4	TP53	TP53 3D hotspot 97-291-4a63	494	4377	0.0883557	-0.124476	0.212832	0.775619	0.818415	0.261405	0.274403	0.260054	3.55898e-08	0.212871	0.176798	3.94131e-06	5.30204e-06	3	activated in tumors	TSG	TRUE
ZEB1	KRAS	KRAS p.G12D	117	6615	0.30234	-0.0171452	0.319485	0.650219	0.621539	0.513605	0.491351	0.514023	3.78424e-08	0.319966	0.623482	0.155629	4.51483e-06	4	no differential activity	Oncogene	TRUE
FOSL2	PIK3CA	PIK3CA 3D hotspot 8-1058-4l1b	547	6014	0.132873	-0.0298115	0.162685	0.682323	0.68435	0.23778	0.238428	0.237721	3.92967e-08	0.169095	0.136927	0.0034117	6.53835e-06	3	no differential activity	Oncogene	TRUE
NRF1	TP53	TP53 interaction ZNF385A loss	109	4377	0.282547	-0.104357	0.386904	0.894499	0.739101	0.520574	0.432538	0.523479	3.939e-08	0.394824	0.00190792	1.86871e-09	5.80891e-06	6	activated in tumors	TSG	TRUE
NR3C1	KRAS	KRAS missense	543	6615	0.189507	0.000611218	0.188896	0.937383	0.784239	0.237048	0.201514	0.240866	4.14089e-08	0.196388	0.0271429	0.569915	4.58745e-06	4	deactivated in tumors	Oncogene	TRUE
FOSL2	PIK3CA	PIK3CA 3D hotspot 8-1053-4l2y	547	6014	0.13265	-0.0298115	0.162462	0.682262	0.68435	0.237456	0.238122	0.237395	4.1446e-08	0.168787	0.136169	0.0033474	6.68698e-06	3	no differential activity	Oncogene	TRUE
ESR1	BRAF	BRAF activitygain	467	6510	0.210218	0.00976576	0.200453	0.635881	0.749981	0.269823	0.315236	0.267277	4.15863e-08	0.196944	0.794212	0.0629282	1.0337e-06	3	deactivated in tumors	Oncogene	TRUE
ESR2	EP300	EP300 p.D1399N	12	6892	-1.32421	0.0140401	-1.33825	0.922055	0.852018	-1.57047	1.45138	1.57068	4.23893e-08	-1.34979	0.0150603	0.00491245	4.13296e-05	3	deactivated in tumors	TSG	TRUE
GATA3	PIK3CA	PIK3CA p.1047	246	6014	0.248548	0.0013729	0.247176	0.79616	0.692491	0.354709	0.31046	0.356937	4.31842e-08	0.250923	0.0201631	0.911703	6.76251e-06	4	deactivated in tumors	Oncogene	TRUE
STAT2	BRAF	BRAF hotspot S602	483	6510	0.198151	-0.0114856	0.209636	0.89352	0.823851	0.252927	0.234618	0.254459	4.54491e-08	0.215505	0.0520877	0.00573054	1.11744e-06	4	activated in tumors	Oncogene	TRUE
HIF1A	PBRM1	PBRM1 truncating	183	6866	0.289373	0.00519587	0.284177	0.735085	0.701327	0.404684	0.38659	0.405199	4.78454e-08	0.288266	0.660294	0.334827	1.07652e-05	4	activated in tumors	TSG	TRUE
SMAD4	MSH6	MSH6 p.T1085fs // MSH6 p.T783fs // MSH6 p.T955fs	26	7000	-0.806717	0.0167787	-0.823496	0.688206	0.750892	-1.097	1.19658	1.09669	4.83712e-08	-0.806012	0.000512627	0.0327579	3.62784e-06	4	deactivated in tumors	TSG	TRUE
FOSL2	TP53	TP53 p.273	215	4377	-0.183842	0.0667705	-0.250612	0.650048	0.659173	-0.380436	0.385529	0.380192	5.04957e-08	-0.25142	0.702732	0.156006	7.37222e-06	3	no differential activity	TSG	TRUE
EGR1	BRAF	BRAF missense	624	6510	0.205812	0.00551929	0.200293	0.874176	0.838833	0.237884	0.229122	0.238776	5.09548e-08	0.193015	0.0192318	0.285725	1.23933e-06	3	deactivated in tumors	Oncogene	TRUE
STAT2	BRAF	BRAF hotspot T599	494	6510	0.195025	-0.0114856	0.206511	0.897174	0.823851	0.24904	0.230179	0.250665	5.1845e-08	0.21234	0.053031	0.00519395	1.24757e-06	4	activated in tumors	Oncogene	TRUE
SOX2	NRAS	NRAS p.61	159	6936	0.313484	-0.0126403	0.326125	0.85961	0.73026	0.444681	0.379387	0.446587	5.26623e-08	0.32088	0.355523	0.0341757	7.30636e-06	6	deactivated in tumors	Oncogene	TRUE
CREB1	NRAS	NRAS missense	221	6936	0.329318	0.00492123	0.324397	0.850919	0.859242	0.377651	0.381232	0.377539	5.43438e-08	0.319493	0.0262803	0.146811	7.30636e-06	4	activated in tumors	Oncogene	TRUE
ATF4	TP53	TP53 p.175	118	4377	0.28738	-0.124476	0.411857	0.864931	0.818415	0.502473	0.476173	0.503237	5.55416e-08	0.415015	0.372705	4.7801e-07	8.02862e-06	3	activated in tumors	TSG	TRUE
ESR1	BRAF	BRAF hotspot S602	483	6510	0.20456	0.00976576	0.194794	0.632974	0.749981	0.262347	0.307744	0.259732	5.73981e-08	0.191689	0.810138	0.0599956	1.36666e-06	3	deactivated in tumors	Oncogene	TRUE
FOSL2	TP53	TP53 interface BCL2L1	418	4377	-0.116469	0.0667705	-0.183239	0.689647	0.659173	-0.276846	0.2657	0.277983	5.95147e-08	-0.184168	0.405347	0.500537	8.51861e-06	3	no differential activity	TSG	TRUE
STAT2	BRAF	BRAF activitygain	467	6510	0.199857	-0.0114856	0.211343	0.892738	0.823851	0.255051	0.236736	0.256531	6.03901e-08	0.216884	0.0509904	0.00441836	1.42292e-06	4	activated in tumors	Oncogene	TRUE
SMAD4	KEAP1	KEAP1 missense	188	6941	-0.295022	0.0214428	-0.316465	0.752755	0.751096	-0.421313	0.420409	0.421338	6.04668e-08	-0.301508	0.000324161	0.0715028	4.53501e-06	4	deactivated in tumors	Oncogene	TRUE
PBX1	MSH6	MSH6 truncating	61	7000	-0.450272	0.0121039	-0.462376	0.798333	0.658492	-0.700777	0.579177	0.702174	6.76971e-08	-0.458561	0.0333246	0.00731474	4.23107e-06	5	deactivated in tumors	TSG	TRUE
PPARG	CTNNB1	CTNNB1 hotspot S37	185	6783	0.308289	0.00505422	0.303235	0.705267	0.751366	0.404214	0.429958	0.403578	6.80132e-08	0.3021	0.489009	0.26096	7.19408e-05	2	deactivated in tumors	Oncogene	TRUE
GATA3	TP53	TP53 truncating	800	4377	-0.0808103	0.0722017	-0.153012	0.725793	0.709111	-0.214991	0.210821	0.21578	6.91807e-08	-0.147865	0.0854196	0.00117608	9.80599e-06	4	deactivated in tumors	TSG	TRUE
GATA2	KEAP1	KEAP1 missense	188	6941	-0.295945	0.0225765	-0.318521	0.886268	0.774283	-0.409712	0.359396	0.411376	7.00357e-08	-0.310802	0.537365	0.0404438	4.72741e-06	5	activated in tumors	Oncogene	TRUE
PBX1	CARD11	CARD11 p.R555fs	20	6914	-0.788071	0.0115836	-0.799655	0.680455	0.658222	-1.21476	1.17518	1.21487	7.00952e-08	-0.796027	0.0419444	0.0102102	4.73143e-05	5	deactivated in tumors	Oncogene	TRUE
ESR1	BRAF	BRAF hotspot T599	494	6510	0.201255	0.00976576	0.191489	0.63615	0.749981	0.257885	0.301013	0.255326	7.09712e-08	0.188272	0.754505	0.0493608	1.655e-06	3	deactivated in tumors	Oncogene	TRUE
FOSL2	TP53	TP53 3D hotspot 96-288-2mej	501	4377	-0.10055	0.0667705	-0.16732	0.671262	0.659173	-0.253353	0.249262	0.253834	7.18163e-08	-0.168183	0.449524	0.601934	1.00817e-05	3	no differential activity	TSG	TRUE
ESR1	TP53	TP53 3D hotspot 97-291-4a63	494	4377	-0.089449	0.0908228	-0.180272	0.707319	0.707762	-0.254723	0.254866	0.254707	7.91389e-08	-0.180025	0.0221602	6.89322e-08	1.10038e-05	3	deactivated in tumors	TSG	TRUE
RXRA	GATA3	GATA3 truncating	107	6972	-0.336231	-0.001272	-0.334959	0.641749	0.654497	-0.511929	0.521947	0.511781	8.21461e-08	-0.343713	0.546824	0.104289	1.21576e-05	2	deactivated in tumors	TSG	TRUE
PBX1	TRIO	TRIO truncating	45	6905	-0.517196	0.0130695	-0.530265	0.859738	0.655606	-0.806981	0.616775	0.808817	8.52179e-08	-0.527118	0.0453178	0.00504126	3.19567e-05	5	deactivated in tumors	Oncogene	TRUE
MAX	CDH1	CDH1 truncating	122	6863	-0.381664	0.0145866	-0.396251	0.838635	0.767376	-0.515504	0.472495	0.516371	8.58392e-08	-0.378261	0.156501	0.0063183	7.15327e-06	4	activated in tumors	TSG	TRUE
STAT2	BRAF	BRAF p.600	460	6510	0.198707	-0.0114856	0.210193	0.894055	0.823851	0.253654	0.2351	0.255134	8.62157e-08	0.215925	0.0530076	0.00407371	1.98997e-06	4	activated in tumors	Oncogene	TRUE
E2F4	TP53	TP53 interface BCL2L1	418	4377	0.118218	-0.0647709	0.182989	0.699698	0.668715	0.272521	0.261526	0.273643	8.72832e-08	0.183915	0.0249098	5.18793e-07	1.20218e-05	2	activated in tumors	TSG	TRUE
NRF1	PIK3CA	PIK3CA interface PIK3R3	573	6014	-0.184851	0.016687	-0.201538	0.808376	0.773603	-0.259485	0.249312	0.260519	8.82816e-08	-0.182884	0.00742509	0.000104675	1.34296e-05	5	activated in tumors	Oncogene	TRUE
JUN	BRAF	BRAF hotspot T599	494	6510	0.179229	-0.00371922	0.182948	0.664122	0.717546	0.25626	0.275473	0.254963	9.49599e-08	0.179238	0.657737	0.0382273	2.15854e-06	2	deactivated in tumors	Oncogene	TRUE
TP63	BRAF	BRAF p.600	460	6510	0.171635	-0.000577806	0.172212	0.614602	0.679826	0.254856	0.280202	0.253318	9.54274e-08	0.175579	0.243266	0.206998	2.15854e-06	4	deactivated in tumors	Oncogene	TRUE
FOXM1	TP53	TP53 hotspot S215	132	4377	0.180707	-0.0786171	0.259324	0.576837	0.571004	0.45402	0.449563	0.454155	9.54644e-08	0.268267	0.00856704	1.20252e-11	1.30257e-05	2	activated in tumors	TSG	TRUE
STAT1	KEAP1	KEAP1 missense	188	6941	-0.29919	0.0256058	-0.324796	0.911918	0.794454	-0.407136	0.356168	0.408829	9.55112e-08	-0.315466	0.833466	0.00086377	5.86091e-06	3	deactivated in tumors	Oncogene	TRUE
ATF4	TP53	TP53 hotspot T284	209	4377	0.191585	-0.124476	0.316061	0.853767	0.818415	0.385416	0.370196	0.386187	9.78732e-08	0.309606	0.365893	1.9943e-06	1.32307e-05	3	activated in tumors	TSG	TRUE
SPI1	CASP8	CASP8 missense	92	7006	0.435679	-0.00308782	0.438767	0.814203	0.769731	0.569592	0.538891	0.570026	1.01615e-07	0.430987	0.0463636	0.0704889	3.04845e-05	4	activated in tumors	TSG	TRUE
PPARG	CTNNB1	CTNNB1 interface HLA-A	154	6783	0.332006	0.00505422	0.326952	0.682043	0.751366	0.43599	0.479371	0.435143	1.02206e-07	0.3257	0.461916	0.238417	7.19408e-05	2	deactivated in tumors	Oncogene	TRUE
TCF3	CTNNB1	CTNNB1 hotspot S37	185	6783	-0.313622	0.0257786	-0.339401	0.771508	0.847531	-0.401368	0.439919	0.400458	1.04042e-07	-0.335534	0.0133797	0.320511	7.19408e-05	5	deactivated in tumors	Oncogene	TRUE
STAT2	BRAF	BRAF interaction increasing MAP2K1 // BRAF p.V600E	457	6510	0.198116	-0.0114856	0.209602	0.89519	0.823851	0.252926	0.234142	0.254417	1.04489e-07	0.215222	0.0526529	0.00401337	2.32288e-06	4	activated in tumors	Oncogene	TRUE
EGR1	BRAF	BRAF hotspot T599	494	6510	0.228071	0.00551929	0.222552	0.878502	0.838833	0.264412	0.253331	0.265312	1.04747e-07	0.210578	0.0204377	0.299393	2.32288e-06	3	deactivated in tumors	Oncogene	TRUE
E2F4	CAD	CAD missense	162	6969	0.2945	0.00684925	0.287651	0.827477	0.685139	0.417686	0.347624	0.419843	1.07207e-07	0.290822	0.000666557	9.86166e-05	2.41215e-05	3	activated in tumors	Oncogene	TRUE
E2F1	MSH6	MSH6 truncating	61	7000	0.433651	0.0120473	0.421603	0.630375	0.635825	0.663129	0.668814	0.66308	1.07495e-07	0.434783	0.0167702	0.000145912	5.75865e-06	3	activated in tumors	TSG	TRUE
MYB	CTNNB1	CTNNB1 GSK3A phosphorylation loss // CTNNB1 GSK3B phosphorylation loss	103	6783	0.394266	-0.0120939	0.40636	0.813328	0.765796	0.530135	0.499627	0.530638	1.07664e-07	0.404859	0.23086	0.7863	7.19408e-05	4	deactivated in tumors	Oncogene	TRUE
E2F4	TP53	TP53 3D hotspot 96-290-2mej	433	4377	0.114352	-0.0647709	0.179123	0.699739	0.668715	0.266726	0.255986	0.267861	1.08828e-07	0.17968	0.0219004	6.55312e-07	1.45767e-05	2	activated in tumors	TSG	TRUE
TP63	BRAF	BRAF interaction increasing MAP2K1 // BRAF p.V600E	457	6510	0.171418	-0.000577806	0.171996	0.616075	0.679826	0.254493	0.27918	0.253	1.10465e-07	0.175296	0.246744	0.206462	2.424e-06	4	deactivated in tumors	Oncogene	TRUE
EZH2	CTNNB1	CTNNB1 hotspot S33	155	6783	-0.346452	0.00717377	-0.353626	0.807123	0.814979	-0.434001	0.438131	0.433908	1.11564e-07	-0.351702	0.14608	0.974303	7.19408e-05	4	activated in tumors	Oncogene	TRUE
EZH2	CTNNB1	CTNNB1 interface FBXW11	155	6783	-0.346452	0.00717377	-0.353626	0.807123	0.814979	-0.434001	0.438131	0.433908	1.11564e-07	-0.351702	0.14608	0.974303	7.19408e-05	4	activated in tumors	Oncogene	TRUE
TP63	BRAF	BRAF hotspot T599	494	6510	0.165249	-0.000577806	0.165827	0.617737	0.679826	0.245436	0.268442	0.243925	1.12343e-07	0.168679	0.29067	0.215372	2.424e-06	4	deactivated in tumors	Oncogene	TRUE
EGR1	BRAF	BRAF activitygain	467	6510	0.234586	0.00551929	0.229067	0.888403	0.838833	0.271974	0.257841	0.273078	1.12522e-07	0.215936	0.0196249	0.299058	2.424e-06	3	deactivated in tumors	Oncogene	TRUE
CREB1	NRAS	NRAS interface RASA1	204	6936	0.3353	0.00492123	0.330379	0.850981	0.859242	0.384605	0.388233	0.3845	1.15719e-07	0.323912	0.0273875	0.14891	1.36133e-05	4	activated in tumors	Oncogene	TRUE
NRF1	PIK3CA	PIK3CA 3D hotspot 2-1061-4jps	543	6014	-0.187974	0.016687	-0.204661	0.812613	0.773603	-0.263432	0.251856	0.264556	1.1745e-07	-0.185701	0.00899192	0.000126968	1.73704e-05	5	activated in tumors	Oncogene	TRUE
NRF1	TP53	TP53 interaction disrupting BCL2L1	111	4377	0.261752	-0.104357	0.36611	0.904909	0.739101	0.492341	0.404582	0.495344	1.20977e-07	0.377125	0.00153277	1.16434e-09	1.60566e-05	6	activated in tumors	TSG	TRUE
MYCN	KEAP1	KEAP1 missense	188	6941	0.305679	0.0052903	0.300389	0.861883	0.755663	0.395957	0.348526	0.397517	1.2587e-07	0.29712	0.0457219	0.00187964	7.08019e-06	3	activated in tumors	Oncogene	TRUE
FOS	TP53	TP53 interface TP53	596	4377	0.0974327	-0.0542338	0.151666	0.681281	0.659863	0.228943	0.22262	0.229845	1.27851e-07	0.153132	0.036415	0.0420742	1.68161e-05	2	activated in tumors	TSG	TRUE
PPARD	KRAS	KRAS interface ZDHHC17	400	6615	0.180032	-0.0158793	0.195911	0.695474	0.686972	0.284978	0.281694	0.28518	1.28635e-07	0.187854	0.218645	0.000318549	1.33007e-05	4	deactivated in tumors	Oncogene	TRUE
EZH2	CTNNB1	CTNNB1 interface HLA-A	154	6783	-0.345627	0.00717377	-0.352801	0.809691	0.814979	-0.432958	0.435723	0.432896	1.31481e-07	-0.350841	0.145911	0.975719	7.19408e-05	4	activated in tumors	Oncogene	TRUE
NRF1	PIK3CA	PIK3CA 3D hotspot 5-1062-3hiz	519	6014	-0.190502	0.016687	-0.207189	0.802518	0.773603	-0.267018	0.258173	0.267823	1.35875e-07	-0.188374	0.00839448	0.000179246	1.95523e-05	5	activated in tumors	Oncogene	TRUE
PPARG	CTNNB1	CTNNB1 hotspot S33	155	6783	0.32769	0.00505422	0.322635	0.681945	0.751366	0.430241	0.47311	0.429398	1.37708e-07	0.321336	0.459475	0.242289	7.19408e-05	2	deactivated in tumors	Oncogene	TRUE
PPARG	CTNNB1	CTNNB1 interface FBXW11	155	6783	0.32769	0.00505422	0.322635	0.681945	0.751366	0.430241	0.47311	0.429398	1.37708e-07	0.321336	0.459475	0.242289	7.19408e-05	2	deactivated in tumors	Oncogene	TRUE
MEF2A	MLH1	MLH1 p.T254fs // MLH1 p.T397fs // MLH1 p.T495fs	10	7031	-1.40447	-0.00310096	-1.40137	1.23182	0.835219	-1.67659	1.13764	1.67785	1.39803e-07	-1.39322	0.835763	0.000203172	8.38815e-05	5	no differential activity	TSG	TRUE
JUN	BRAF	BRAF activitygain	467	6510	0.182076	-0.00371922	0.185795	0.656709	0.717546	0.260347	0.282918	0.258931	1.39978e-07	0.181617	0.684735	0.0434951	2.98704e-06	2	deactivated in tumors	Oncogene	TRUE
JUN	BRAF	BRAF p.600	460	6510	0.183051	-0.00371922	0.18677	0.648866	0.717546	0.261866	0.28784	0.26029	1.43953e-07	0.182691	0.713191	0.0433015	3.04314e-06	2	deactivated in tumors	Oncogene	TRUE
HIF1A	ATM	ATM missense	359	6712	0.201843	0.00314656	0.198697	0.785672	0.696746	0.283237	0.2529	0.285178	1.46395e-07	0.200501	0.555699	0.617012	5.27981e-05	2	activated in tumors	TSG	TRUE
JUN	BRAF	BRAF interaction increasing MAP2K1 // BRAF p.V600E	457	6510	0.183448	-0.00371922	0.187167	0.650739	0.717546	0.262373	0.287623	0.260844	1.52771e-07	0.182935	0.71232	0.0436419	3.19966e-06	2	deactivated in tumors	Oncogene	TRUE
TP63	BRAF	BRAF interaction disrupting MAP2K1	469	6510	0.167414	-0.000577806	0.167992	0.61784	0.679826	0.248566	0.271902	0.24711	1.56548e-07	0.170904	0.267045	0.204635	3.24869e-06	4	deactivated in tumors	Oncogene	TRUE
NRF1	TP53	TP53 p.248	155	4377	0.211676	-0.104357	0.316034	0.765168	0.739101	0.427071	0.413025	0.427592	1.57156e-07	0.316488	0.00381903	2.26839e-09	2.04859e-05	6	activated in tumors	TSG	TRUE
ZEB1	PTEN	PTEN activityloss	94	6484	0.329022	-0.0127853	0.341808	0.722597	0.620627	0.549366	0.473027	0.550746	1.58424e-07	0.339853	0.758216	0.659695	0.000166105	3	no differential activity	TSG	TRUE
E2F1	PDGFRA	PDGFRA missense	204	6938	0.247442	0.0107585	0.236684	0.646955	0.63458	0.372769	0.365843	0.372978	1.66224e-07	0.236312	0.0291839	0.000577985	6.10922e-05	3	activated in tumors	Oncogene	TRUE
NR3C1	KRAS	KRAS p.12	371	6615	0.214855	0.000611218	0.214244	0.912658	0.784239	0.270659	0.234747	0.273187	1.69927e-07	0.222036	0.0253401	0.639092	1.6472e-05	4	deactivated in tumors	Oncogene	TRUE
MYCN	EGFR	EGFR interface PDGFRA	36	6797	-0.659149	0.0182697	-0.677418	1.08254	0.75503	-0.894791	0.625768	0.897208	1.76792e-07	-0.661548	0.0857724	0.00355143	0.000259293	2	activated in tumors	Oncogene	TRUE
PBX1	NR4A2	NR4A2 p.N231fs // NR4A2 p.N294fs	5	7068	-1.53749	0.0121264	-1.54962	0.284025	0.658926	-2.35228	5.45592	2.35173	1.775e-07	-1.53942	0.0187124	0.00504977	3.54999e-05	5	deactivated in tumors	TSG	TRUE
E2F1	ATM	ATM missense	359	6712	0.182637	0.00794605	0.17469	0.656534	0.633665	0.275171	0.26608	0.275683	1.86278e-07	0.179667	0.00727075	0.000329621	5.27981e-05	1	activated in tumors	TSG	TRUE
STAT2	BRAF	BRAF interaction disrupting MAP2K1	469	6510	0.191456	-0.0114856	0.202942	0.892309	0.823851	0.244915	0.227434	0.246333	1.86819e-07	0.208098	0.0580021	0.00403077	3.84161e-06	4	activated in tumors	Oncogene	TRUE
JUN	BRAF	BRAF interaction disrupting MAP2K1	469	6510	0.179195	-0.00371922	0.182914	0.649196	0.717546	0.256482	0.281755	0.254916	1.88913e-07	0.179125	0.713318	0.0440112	3.84968e-06	2	deactivated in tumors	Oncogene	TRUE
FOSL2	PIK3CA	PIK3CA p.H1047R	208	6014	0.204623	-0.0298115	0.234435	0.66759	0.68435	0.342842	0.351166	0.342566	1.89685e-07	0.253458	0.06142	0.000536043	2.65774e-05	3	no differential activity	Oncogene	TRUE
PBX1	KEAP1	KEAP1 missense	188	6941	-0.250381	0.0153009	-0.265682	0.621536	0.661215	-0.402424	0.42746	0.401809	2.00181e-07	-0.254411	0.0247267	0.0180846	1.0394e-05	5	deactivated in tumors	Oncogene	TRUE
FOXM1	TP53	TP53 hotspot T211	99	4377	0.216794	-0.0786171	0.295411	0.578106	0.571004	0.517212	0.510998	0.517353	2.06516e-07	0.300464	0.0133682	1.52424e-11	2.6682e-05	2	activated in tumors	TSG	TRUE
E2F4	TP53	TP53 interface BCL2	434	4377	0.110233	-0.0647709	0.175004	0.703562	0.668715	0.260451	0.24874	0.261702	2.08997e-07	0.175521	0.0210053	6.90725e-07	2.67658e-05	2	activated in tumors	TSG	TRUE
RXRA	CTNNB1	CTNNB1 hotspot S37	185	6783	-0.251155	0.00197157	-0.253127	0.556587	0.658403	-0.385913	0.454784	0.384456	2.10867e-07	-0.253998	0.547313	0.293677	9.84579e-05	1	deactivated in tumors	Oncogene	TRUE
E2F4	NCOR2	NCOR2 missense	99	6980	0.366985	0.00776698	0.359218	0.686924	0.689103	0.521307	0.522938	0.521284	2.12884e-07	0.361814	0.000496611	0.000110279	6.38651e-05	3	activated in tumors	Oncogene	TRUE
HIF1A	ATM	ATM truncating	125	6712	0.3302	0.00314656	0.327053	0.853467	0.696746	0.467284	0.383205	0.469401	2.16608e-07	0.328101	0.516914	0.689927	5.27981e-05	2	activated in tumors	TSG	TRUE
E2F1	MSH6	MSH6 p.T1085fs // MSH6 p.T783fs // MSH6 p.T955fs	26	7000	0.634227	0.0120473	0.62218	0.445718	0.635825	0.979426	1.3959	0.978539	2.20014e-07	0.64742	0.0092533	0.000155588	1.03132e-05	3	activated in tumors	TSG	TRUE
ATF1	TP53	TP53 interface TP53	596	4377	0.132411	-0.0329488	0.16536	0.777396	0.74829	0.219942	0.21271	0.220984	2.23976e-07	0.169994	4.85422e-06	0.00110566	2.84346e-05	2	activated in tumors	TSG	TRUE
PPARD	KRAS	KRAS p.12	371	6615	0.182854	-0.0158793	0.198733	0.685923	0.686972	0.289312	0.289731	0.289289	2.25303e-07	0.19064	0.199033	0.000564023	2.05553e-05	4	deactivated in tumors	Oncogene	TRUE
JUN	BRAF	BRAF hotspot S602	483	6510	0.175348	-0.00371922	0.179067	0.646932	0.717546	0.251181	0.276795	0.249555	2.29036e-07	0.175452	0.725051	0.0406332	4.62563e-06	2	deactivated in tumors	Oncogene	TRUE
EZH2	CTNNB1	CTNNB1 hotspot S37	185	6783	-0.309692	0.00717377	-0.316865	0.812345	0.814979	-0.388835	0.390063	0.388802	2.30349e-07	-0.314544	0.135982	0.962775	9.84579e-05	4	activated in tumors	Oncogene	TRUE
NFKB1	KEAP1	KEAP1 missense	188	6941	-0.274037	0.0183671	-0.292404	0.823672	0.748867	-0.389392	0.355001	0.390462	2.53402e-07	-0.286945	0.29848	0.00306328	1.22176e-05	4	no differential activity	Oncogene	TRUE
NRF1	PIK3CA	PIK3CA missense	1097	6014	-0.137359	0.016687	-0.154046	0.842884	0.773603	-0.196317	0.182761	0.199129	2.57768e-07	-0.134425	0.0206184	3.03162e-05	3.51906e-05	5	activated in tumors	Oncogene	TRUE
E2F6	GATA3	GATA3 truncating	107	6972	0.396814	0.00327488	0.393539	0.691874	0.808038	0.488006	0.568801	0.48703	2.70918e-07	0.406195	0.45796	0.0554548	2.81771e-05	3	activated in tumors	TSG	TRUE
GATA3	TP53	TP53 missense	1991	4377	-0.027379	0.0722017	-0.0995807	0.666711	0.709111	-0.143048	0.149361	0.14043	2.79389e-07	-0.0968322	0.0773806	0.00149328	3.51637e-05	4	deactivated in tumors	TSG	TRUE
E2F4	CREBBP	CREBBP missense	282	6820	0.209433	0.00442153	0.205012	0.749088	0.685836	0.297787	0.273682	0.298922	2.80369e-07	0.215366	0.000463505	6.79956e-05	0.000238705	3	activated in tumors	TSG	TRUE
RUNX2	NRAS	NRAS missense	221	6936	-0.244112	0.0129835	-0.257096	0.671831	0.7166	-0.359442	0.38268	0.358772	2.81652e-07	-0.251132	0.000376772	0.110766	2.94523e-05	5	no differential activity	Oncogene	TRUE
EGR1	BRAF	BRAF hotspot S602	483	6510	0.2236	0.00551929	0.21808	0.883161	0.838833	0.259014	0.246932	0.259981	2.83688e-07	0.205573	0.0211837	0.289353	5.67869e-06	3	deactivated in tumors	Oncogene	TRUE
NFKB1	GATA3	GATA3 truncating	107	6972	-0.338343	0.0144195	-0.352763	0.739701	0.750475	-0.470153	0.476899	0.470053	2.85578e-07	-0.376948	0.55738	0.000233838	2.81771e-05	3	no differential activity	TSG	TRUE
ATF1	TP53	TP53 interface TP53BP1 // TP53 3D hotspot 95-289-1kzy // TP53 3D hotspot 95-292-1gzh	353	4377	0.174587	-0.0329488	0.207536	0.762142	0.74829	0.276962	0.272306	0.277347	2.89031e-07	0.212742	1.17671e-06	0.00626371	3.58143e-05	2	activated in tumors	TSG	TRUE
FOS	TP53	TP53 hotspot S269	348	4377	0.135415	-0.0542338	0.189649	0.663325	0.659863	0.287296	0.285907	0.287407	2.89464e-07	0.188885	0.32628	0.118592	3.58143e-05	2	activated in tumors	TSG	TRUE
CEBPB	TP53	TP53 interface PPP1R13L	587	4377	-0.122772	0.0526016	-0.175374	0.796381	0.779406	-0.224427	0.220213	0.225009	2.94784e-07	-0.176366	0.153203	0.766733	3.61661e-05	3	deactivated in tumors	TSG	TRUE
FOXM1	TP53	TP53 interface TP63	161	4377	0.157705	-0.0786171	0.236322	0.567956	0.571004	0.413949	0.416092	0.413871	3.01859e-07	0.233971	0.00863127	6.3791e-12	3.67255e-05	2	activated in tumors	TSG	TRUE
MYC	CTNNB1	CTNNB1 missense	354	6783	0.199603	-0.00276975	0.202373	0.711607	0.733945	0.276143	0.284389	0.275733	3.03742e-07	0.204996	0.0230263	0.00565738	0.00011901	2	activated in tumors	Oncogene	TRUE
PPARG	PIK3CA	PIK3CA activitygain	599	6014	0.16287	-0.00262904	0.165499	0.873128	0.728701	0.222768	0.189548	0.227116	3.08439e-07	0.165098	0.522364	0.887126	4.10555e-05	4	deactivated in tumors	Oncogene	TRUE
TP53	KRAS	KRAS missense	543	6615	0.163977	-0.00509524	0.169072	0.76984	0.737242	0.22855	0.21962	0.229331	3.26227e-07	0.169781	0.522281	0.10491	2.81095e-05	3	deactivated in tumors	Oncogene	TRUE
MAX	TP53	TP53 missense	1991	4377	0.0593773	-0.0484045	0.107782	0.788652	0.75047	0.141333	0.136666	0.143619	3.36153e-07	0.10532	0.311361	4.22302e-05	4.05598e-05	2	activated in tumors	TSG	TRUE
ESR1	PIK3CA	PIK3CA 3D hotspot 8-1059-4l23	538	6014	0.168957	-0.00138062	0.170338	0.767225	0.735214	0.230844	0.222018	0.231685	3.39534e-07	0.170731	0.50025	0.796783	4.36105e-05	2	deactivated in tumors	Oncogene	TRUE
CREB1	PDGFRA	PDGFRA missense	204	6938	0.31372	0.0057618	0.307958	0.802341	0.860795	0.358429	0.383825	0.35776	3.39864e-07	0.311768	0.0117171	0.184277	6.10922e-05	3	activated in tumors	Oncogene	TRUE
RUNX1	CASP8	CASP8 missense	92	7006	0.414673	-0.0180275	0.4327	0.824737	0.80234	0.539102	0.524653	0.539298	3.46503e-07	0.430018	0.363131	0.918686	7.79631e-05	3	deactivated in tumors	TSG	TRUE
ESR1	PIK3CA	PIK3CA interface PIK3R3	573	6014	0.164172	-0.00138062	0.165552	0.769261	0.735214	0.224255	0.21521	0.225176	3.51086e-07	0.165768	0.549862	0.772536	4.36105e-05	2	deactivated in tumors	Oncogene	TRUE
NRF1	PIK3CA	PIK3CA 3D hotspot 8-1058-4l1b	547	6014	-0.179704	0.016687	-0.196391	0.809621	0.773603	-0.252865	0.242572	0.253866	3.52207e-07	-0.177785	0.00735683	0.000104237	4.36105e-05	5	activated in tumors	Oncogene	TRUE
FOXO3	TP53	TP53 missense	1991	4377	-0.0551999	0.0607737	-0.115974	0.864298	0.832486	-0.137644	0.134182	0.13931	3.55756e-07	-0.116262	0.53444	0.177458	4.25732e-05	2	deactivated in tumors	TSG	TRUE
FOXM1	NR4A2	NR4A2 missense	68	7068	0.358067	0.00779636	0.35027	0.526895	0.577312	0.607203	0.664782	0.606726	3.62251e-07	0.357507	0.0138749	1.56371e-05	5.43376e-05	3	activated in tumors	TSG	TRUE
E2F6	AXIN2	AXIN2 p.G665fs	24	7041	0.840538	0.00817816	0.83236	0.612908	0.806552	1.03271	1.35805	1.032	3.63438e-07	0.839967	0.350733	0.110698	8.17736e-05	2	activated in tumors	TSG	TRUE
NRF1	PIK3CA	PIK3CA interface PIK3R1	580	6014	-0.17452	0.016687	-0.191207	0.815649	0.773603	-0.245961	0.234423	0.247164	3.70008e-07	-0.172939	0.00981342	7.90786e-05	4.47734e-05	5	activated in tumors	Oncogene	TRUE
E2F4	SMARCA4	SMARCA4 missense	230	6895	0.240972	0.00414336	0.236828	0.678192	0.688862	0.343967	0.349205	0.343797	3.7067e-07	0.234665	0.00104718	0.000128893	6.87032e-05	2	activated in tumors	TSG	TRUE
BACH1	HRAS	HRAS 3D hotspot 5-164-1bkd	53	7081	-0.503623	0.0261146	-0.529737	0.778912	0.753897	-0.702493	0.680099	0.702666	3.801e-07	-0.528453	0.0443413	0.806916	3.95101e-05	4	no differential activity	Oncogene	TRUE
TP63	BRAF	BRAF activitygain	467	6510	0.162398	-0.000577806	0.162975	0.617753	0.679826	0.241139	0.26382	0.239731	3.82218e-07	0.165878	0.274101	0.201667	7.5839e-06	4	deactivated in tumors	Oncogene	TRUE
FOXM1	MSH6	MSH6 truncating	61	7000	0.372156	0.00763245	0.364524	0.491963	0.579091	0.630221	0.740957	0.629475	3.8306e-07	0.377781	0.00942434	1.52084e-05	1.59609e-05	4	activated in tumors	TSG	TRUE
CREB1	GATA3	GATA3 truncating	107	6972	0.42534	0.00667854	0.418662	0.85548	0.859227	0.487286	0.489388	0.487254	3.88576e-07	0.426871	0.011976	0.0839305	3.28624e-05	2	activated in tumors	TSG	TRUE
MYCN	STK11	STK11 truncating	61	7032	0.506632	0.00734741	0.499284	0.721115	0.758205	0.658774	0.692378	0.658508	3.97614e-07	0.494385	0.045684	0.00273457	0.000128072	3	activated in tumors	TSG	TRUE
MEF2A	NFE2L2	NFE2L2 missense	175	6974	-0.328782	0.00340331	-0.332185	0.910753	0.832742	-0.397956	0.364737	0.398905	3.98175e-07	-0.324837	0.53856	0.000205688	0.000235309	3	no differential activity	Oncogene	TRUE
ATF4	PIK3CA	PIK3CA interaction increasing IRS1	426	6014	-0.198092	0.0109602	-0.209052	0.900663	0.815221	-0.254589	0.232109	0.256436	3.99589e-07	-0.210274	0.0270083	0.357785	4.72784e-05	4	activated in tumors	Oncogene	TRUE
FOXM1	TP53	TP53 p.249	39	4377	0.392887	-0.0786171	0.471504	0.551717	0.571004	0.825982	0.854614	0.825746	4.00163e-07	0.463453	0.00718313	2.79424e-12	4.7498e-05	2	activated in tumors	TSG	TRUE
E2F4	PDGFRA	PDGFRA missense	204	6938	0.253674	0.00701489	0.246659	0.725192	0.687676	0.358115	0.340129	0.358685	4.07281e-07	0.247957	0.000935868	0.000154706	6.10922e-05	3	activated in tumors	Oncogene	TRUE
E2F4	FN1	FN1 missense	223	6911	0.238975	0.00713552	0.23184	0.717985	0.687852	0.33658	0.322903	0.337049	4.22166e-07	0.237752	0.000576237	0.000184402	0.00012665	4	activated in tumors	TSG	TRUE
ESR2	EP300	EP300 p.1399	13	6892	-1.17698	0.0140401	-1.19102	1.03012	0.852018	-1.39732	1.15619	1.39788	4.30677e-07	-1.19626	0.0171719	0.00537506	0.000168623	3	deactivated in tumors	TSG	TRUE
TCF3	CTNNB1	CTNNB1 hotspot S33	155	6783	-0.324486	0.0257786	-0.350264	0.771742	0.847531	-0.414062	0.453862	0.413276	4.432e-07	-0.347264	0.0137714	0.352834	0.000150273	5	deactivated in tumors	Oncogene	TRUE
TCF3	CTNNB1	CTNNB1 interface FBXW11	155	6783	-0.324486	0.0257786	-0.350264	0.771742	0.847531	-0.414062	0.453862	0.413276	4.432e-07	-0.347264	0.0137714	0.352834	0.000150273	5	deactivated in tumors	Oncogene	TRUE
MYB	CTNNB1	CTNNB1 hotspot S37	185	6783	0.278367	-0.0120939	0.290461	0.794836	0.765796	0.378906	0.365435	0.379293	4.47457e-07	0.288718	0.239328	0.908618	0.000150273	4	deactivated in tumors	Oncogene	TRUE
ESR1	PIK3CA	PIK3CA 3D hotspot 8-1058-4l1b	547	6014	0.165991	-0.00138062	0.167372	0.763579	0.735214	0.226909	0.219194	0.227651	4.47963e-07	0.167589	0.510757	0.76407	5.06327e-05	2	deactivated in tumors	Oncogene	TRUE
NRF1	PIK3CA	PIK3CA 3D hotspot 8-1059-4l23	538	6014	-0.179574	0.016687	-0.196261	0.810451	0.773603	-0.252689	0.242163	0.253698	4.56222e-07	-0.17745	0.00731922	0.000130173	5.06327e-05	5	activated in tumors	Oncogene	TRUE
NRF1	PIK3CA	PIK3CA 3D hotspot 8-1053-4l2y	547	6014	-0.177939	0.016687	-0.194626	0.810642	0.773603	-0.250563	0.240088	0.251583	4.56469e-07	-0.176059	0.00715755	9.62593e-05	5.06327e-05	5	activated in tumors	Oncogene	TRUE
E2F1	CAD	CAD missense	162	6969	0.264117	0.0113129	0.252804	0.704853	0.633212	0.398167	0.358662	0.399241	4.75005e-07	0.254226	0.0221727	0.000419653	5.3438e-05	3	activated in tumors	Oncogene	TRUE
YY1	STK11	STK11 truncating	61	7032	0.52314	0.00229425	0.520846	0.84914	0.793095	0.656319	0.61338	0.656725	4.78386e-07	0.514235	0.971618	0.00635501	0.000128072	4	activated in tumors	TSG	TRUE
E2F1	TP53	TP53 3D hotspot 96-288-2mej	501	4377	0.0993542	-0.0480138	0.147368	0.633322	0.62954	0.233944	0.232691	0.234088	4.81588e-07	0.149467	0.0340335	1.04199e-06	5.6702e-05	2	activated in tumors	TSG	TRUE
GATA1	SMARCA4	SMARCA4 truncating	30	6895	-0.733378	0.0212096	-0.754588	0.942817	0.814538	-0.925742	0.800355	0.9264	4.82614e-07	-0.750907	0.912811	0.00102115	6.87032e-05	5	deactivated in tumors	TSG	TRUE
E2F4	CARD11	CARD11 missense	213	6914	0.239976	0.00464437	0.235331	0.745489	0.686634	0.341824	0.315674	0.342732	4.84326e-07	0.241059	0.000279207	6.45332e-05	0.000148704	4	activated in tumors	Oncogene	TRUE
HIF1A	KRAS	KRAS missense	543	6615	0.160068	0.00291039	0.157158	0.799661	0.694282	0.223611	0.19653	0.22636	4.88908e-07	0.158895	0.53658	0.772159	3.99097e-05	4	activated in tumors	Oncogene	TRUE
RELA	CTNNB1	CTNNB1 hotspot S37	185	6783	-0.251498	0.0122758	-0.263773	0.582133	0.711848	-0.372179	0.453115	0.370547	5.18562e-07	-0.265273	0.400977	0.00235794	0.000162543	2	no differential activity	Oncogene	TRUE
ZEB1	SMARCA4	SMARCA4 truncating	30	6895	-0.5744	0.00292537	-0.577326	0.737562	0.626369	-0.920956	0.782748	0.921702	5.23453e-07	-0.576039	0.674515	0.105809	6.87032e-05	3	no differential activity	TSG	TRUE
GATA2	CDH1	CDH1 truncating	122	6863	0.37438	0.00558114	0.368799	0.696788	0.778624	0.474474	0.529285	0.473655	5.30443e-07	0.35836	0.308619	0.108203	3.97832e-05	5	activated in tumors	TSG	TRUE
E2F4	BCLAF1	BCLAF1 missense	239	6893	0.235141	0.00596548	0.229175	0.732325	0.686942	0.332859	0.312942	0.333617	5.31117e-07	0.227409	0.000997922	0.000154034	0.000110934	3	activated in tumors	Oncogene	TRUE
FOSL2	HRAS	HRAS 3D hotspot 5-163-4lwz // HRAS p.61	27	7081	-0.666496	0.00300466	-0.669501	0.584121	0.684702	-0.978286	1.14617	0.977799	5.31826e-07	-0.662311	0.0478531	0.167534	5.10291e-05	3	no differential activity	Oncogene	TRUE
E2F1	ABCB1	ABCB1 missense	227	6908	0.22155	0.0101479	0.211402	0.645517	0.634758	0.332863	0.327493	0.333044	5.33774e-07	0.214904	0.0285317	0.00025122	0.000120657	2	activated in tumors	Oncogene	TRUE
PPARG	TP53	TP53 missense	1991	4377	-0.0492655	0.0505728	-0.0998383	0.741757	0.742127	-0.134551	0.134597	0.13453	5.48574e-07	-0.100701	0.193519	0.0762572	6.40722e-05	2	deactivated in tumors	TSG	TRUE
E2F6	FGFR3	FGFR3 interface FGF1 // FGFR3 3D hotspot 150-362-1ry7	23	7059	0.856883	0.00786919	0.849014	0.950316	0.804574	1.05459	0.893401	1.05523	5.48937e-07	0.843701	0.377421	0.205887	0.000265676	4	activated in tumors	Oncogene	TRUE
TP63	BRAF	BRAF hotspot S602	483	6510	0.157452	-0.000577806	0.15803	0.62247	0.679826	0.233762	0.253875	0.232456	5.55006e-07	0.16099	0.277833	0.207371	1.09166e-05	4	deactivated in tumors	Oncogene	TRUE
GATA3	MAP3K1	MAP3K1 truncating	87	6974	0.410261	0.0223386	0.387922	0.581311	0.701658	0.553924	0.667323	0.552865	5.55582e-07	0.38038	0.132736	0.134528	5.55582e-05	4	deactivated in tumors	TSG	TRUE
FOS	TP53	TP53 Stability uniprot = D	218	4377	0.173587	-0.0542338	0.227821	0.653811	0.659863	0.345404	0.34845	0.345255	5.66597e-07	0.229101	0.00896245	0.0218346	6.5652e-05	2	activated in tumors	TSG	TRUE
TP53	PIK3CA	PIK3CA activitygain	599	6014	0.15407	-0.0105714	0.164641	0.775644	0.735431	0.222742	0.212264	0.223871	5.74681e-07	0.160434	0.627212	0.276591	6.24443e-05	2	deactivated in tumors	Oncogene	TRUE
TP63	BRAF	BRAF missense	624	6510	0.141011	-0.000577806	0.141589	0.65863	0.679826	0.208832	0.214975	0.208272	5.7482e-07	0.142648	0.45405	0.128021	1.12088e-05	4	deactivated in tumors	Oncogene	TRUE
E2F4	EP300	EP300 missense	213	6892	0.242305	0.00544965	0.236856	0.657362	0.690455	0.343523	0.360312	0.343043	5.78051e-07	0.239956	0.000593411	0.000112632	0.000168623	2	activated in tumors	TSG	TRUE
ESR1	PIK3CA	PIK3CA 3D hotspot 8-1053-4l2y	547	6014	0.164346	-0.00138062	0.165727	0.765829	0.735214	0.22462	0.216402	0.225413	5.9439e-07	0.165809	0.516213	0.733285	6.29663e-05	2	deactivated in tumors	Oncogene	TRUE
FOSL2	TP53	TP53 interface TP53	596	4377	-0.0773475	0.0667705	-0.144118	0.671058	0.659173	-0.21816	0.214762	0.218635	6.01607e-07	-0.144353	0.441499	0.249749	6.91598e-05	3	no differential activity	TSG	TRUE
ESR1	PIK3CA	PIK3CA 3D hotspot 2-1061-4jps	543	6014	0.164583	-0.00138062	0.165964	0.774438	0.735214	0.22472	0.214302	0.225736	6.03139e-07	0.166526	0.48915	0.818841	6.29663e-05	2	deactivated in tumors	Oncogene	TRUE
ATF4	CTNNB1	CTNNB1 hotspot S37	185	6783	-0.312417	-0.00817931	-0.304238	0.819288	0.826921	-0.368006	0.371345	0.367917	6.15531e-07	-0.307331	0.0284154	0.00637249	0.000180879	3	activated in tumors	Oncogene	TRUE
NRF1	TP53	TP53 hotspot S215	132	4377	0.210594	-0.104357	0.314951	0.811822	0.739101	0.424855	0.387956	0.426127	6.16168e-07	0.325655	0.00391378	2.41304e-09	7.02803e-05	6	activated in tumors	TSG	TRUE
JUN	BRAF	BRAF missense	624	6510	0.148752	-0.00371922	0.152471	0.691665	0.717546	0.21315	0.22044	0.212489	6.23642e-07	0.15	0.54507	0.0303642	1.20569e-05	2	deactivated in tumors	Oncogene	TRUE
ESR1	PIK3CA	PIK3CA interface PIK3R1	580	6014	0.159689	-0.00138062	0.16107	0.767984	0.735214	0.218208	0.209731	0.219079	6.28074e-07	0.161181	0.542452	0.730903	6.43085e-05	2	deactivated in tumors	Oncogene	TRUE
MYC	FBXW7	FBXW7 truncating	97	6806	0.35852	-0.00361819	0.362138	0.708856	0.731002	0.495606	0.510877	0.4954	6.39208e-07	0.372599	0.0171104	0.00162041	0.00115058	2	activated in tumors	TSG	TRUE
E2F4	PTEN	PTEN p.R130G	27	6484	-0.679346	0.0144732	-0.693819	0.54309	0.685032	-1.01358	1.27754	1.01283	6.44519e-07	-0.658316	0.000262125	0.00392691	0.000506827	2	activated in tumors	TSG	TRUE
E2F7	MSH6	MSH6 truncating	61	7000	0.398586	0.00995304	0.388633	0.551965	0.62715	0.620276	0.70409	0.619682	6.60966e-07	0.401022	0.0148905	0.00124971	2.47862e-05	4	activated in tumors	TSG	TRUE
TCF3	CTNNB1	CTNNB1 interface HLA-A	154	6783	-0.319843	0.0257786	-0.345622	0.772085	0.847531	-0.408566	0.447647	0.407798	6.89094e-07	-0.342497	0.013626	0.347995	0.000190585	5	deactivated in tumors	Oncogene	TRUE
FOXM1	EP300	EP300 missense	213	6892	0.204333	0.00520081	0.199132	0.503088	0.579662	0.344803	0.395819	0.343531	6.91785e-07	0.19963	0.0110376	3.40136e-05	0.000168623	3	activated in tumors	TSG	TRUE
E2F1	TP53	TP53 3D hotspot 97-287-1ycs	581	4377	0.0889134	-0.0480138	0.136927	0.614057	0.62954	0.218125	0.222988	0.217504	7.11732e-07	0.137386	0.14937	2.33365e-05	8.0551e-05	2	activated in tumors	TSG	TRUE
CREB1	CDH1	CDH1 truncating	122	6863	-0.378425	0.0220746	-0.4005	1.06224	0.853596	-0.466977	0.377034	0.469191	7.228e-07	-0.390605	0.0121289	0.468149	4.92818e-05	3	activated in tumors	TSG	TRUE
E2F1	BCLAF1	BCLAF1 missense	239	6893	0.220163	0.0102796	0.209883	0.64648	0.634552	0.330549	0.324655	0.330758	7.39559e-07	0.207162	0.0294427	0.000697418	0.000110934	3	activated in tumors	Oncogene	TRUE
FOXM1	NCOR2	NCOR2 missense	99	6980	0.296573	0.00712886	0.289444	0.445893	0.579576	0.500824	0.649133	0.499407	7.53146e-07	0.28941	0.0105418	2.32579e-05	0.000150629	3	activated in tumors	Oncogene	TRUE
STAT2	BRAF	BRAF missense	624	6510	0.157353	-0.0114856	0.168838	0.897977	0.823851	0.203275	0.188021	0.204938	7.54968e-07	0.172808	0.0551477	0.00715501	1.44721e-05	4	activated in tumors	Oncogene	TRUE
REL	FGFR3	FGFR3 interface FGF1 // FGFR3 3D hotspot 150-362-1ry7	23	7059	-0.854918	-0.000967097	-0.853951	0.895413	0.814906	-1.04758	0.953695	1.04791	7.87189e-07	-0.841994	0.145504	0.0110193	0.000265676	6	deactivated in tumors	Oncogene	TRUE
E2F4	ABCB1	ABCB1 missense	227	6908	0.229393	0.00605313	0.22334	0.714701	0.687749	0.324331	0.312495	0.324741	8.0438e-07	0.229173	0.000777405	5.89622e-05	0.000120657	2	activated in tumors	Oncogene	TRUE
RXRA	CTNNB1	CTNNB1 hotspot S33	155	6783	-0.2603	0.00197157	-0.262272	0.541602	0.658403	-0.399783	0.484251	0.398345	8.07074e-07	-0.263236	0.542469	0.290781	0.000210814	1	deactivated in tumors	Oncogene	TRUE
RXRA	CTNNB1	CTNNB1 interface FBXW11	155	6783	-0.2603	0.00197157	-0.262272	0.541602	0.658403	-0.399783	0.484251	0.398345	8.07074e-07	-0.263236	0.542469	0.290781	0.000210814	1	deactivated in tumors	Oncogene	TRUE
FOXM1	TP53	TP53 hotspot T155	173	4377	0.152134	-0.0786171	0.230751	0.535054	0.571004	0.40505	0.431267	0.404115	8.11453e-07	0.217358	0.00328362	5.54414e-12	9.11306e-05	2	activated in tumors	TSG	TRUE
E2F4	CARD11	CARD11 p.R555fs	20	6914	0.724823	0.00464437	0.720179	0.48182	0.686634	1.04958	1.4947	1.04885	8.11743e-07	0.758238	0.00032421	0.000169029	0.000148704	4	activated in tumors	Oncogene	TRUE
FOXI1	GATA3	GATA3 truncating	107	6972	-0.310097	0.0361697	-0.346267	0.869788	0.759587	-0.454803	0.398105	0.455862	8.11939e-07	-0.367535	0.00344818	0.0242019	6.00835e-05	2	deactivated in tumors	TSG	TRUE
ELK1	TP53	TP53 missense	1991	4377	0.0554271	-0.0391416	0.0945687	0.746713	0.687613	0.133833	0.126647	0.137532	8.46098e-07	0.0942788	0.696383	0.0203877	9.4296e-05	3	activated in tumors	TSG	TRUE
ESR1	PIK3CA	PIK3CA 3D hotspot 5-1062-3hiz	519	6014	0.165071	-0.00138062	0.166452	0.765879	0.735214	0.225639	0.217335	0.226399	8.63751e-07	0.167411	0.489143	0.897003	8.66577e-05	2	deactivated in tumors	Oncogene	TRUE
PPARG	PIK3CA	PIK3CA 3D hotspot 5-1062-3hhm	513	6014	0.165104	-0.00262904	0.167733	0.837289	0.728701	0.227342	0.200328	0.23018	8.78899e-07	0.168237	0.615967	0.661305	8.66577e-05	4	deactivated in tumors	Oncogene	TRUE
GABPA	KEAP1	KEAP1 missense	188	6941	0.284418	-0.00737289	0.291791	0.814039	0.781483	0.372965	0.358448	0.373381	8.79827e-07	0.285239	0.476648	0.123469	3.95922e-05	5	activated in tumors	Oncogene	TRUE
ATF1	STK11	STK11 p.G279fs	6	7032	1.54933	0.0160265	1.5333	1.38243	0.759235	2.01788	1.10914	2.01954	8.80211e-07	1.5247	3.57718e-06	0.00444966	0.000176735	2	activated in tumors	TSG	TRUE
PBX1	CARD11	CARD11 truncating	35	6914	-0.541989	0.0115836	-0.553572	0.701862	0.658222	-0.84073	0.788719	0.841012	8.8121e-07	-0.549046	0.036377	0.0115597	0.000148704	5	deactivated in tumors	Oncogene	TRUE
ESR1	TP53	TP53 p.195	31	4377	-0.528176	0.0908228	-0.618999	0.862464	0.707762	-0.873146	0.71771	0.874586	9.11561e-07	-0.625667	0.0520874	2.46585e-09	0.000100822	3	deactivated in tumors	TSG	TRUE
ETS1	BRAF	BRAF activitygain	467	6510	-0.179534	0.0135106	-0.193045	0.732968	0.804543	-0.241318	0.263375	0.239944	9.19312e-07	-0.189711	0.940031	0.00694491	1.74744e-05	3	activated in tumors	Oncogene	TRUE
STAT3	HRAS	HRAS 3D hotspot 5-163-4lwz // HRAS p.61	27	7081	-0.667282	0.0112162	-0.678498	0.786186	0.721522	-0.940049	0.863025	0.940371	9.32926e-07	-0.683262	0.321877	0.0220023	8.18558e-05	3	deactivated in tumors	Oncogene	TRUE
ZEB1	CTNNB1	CTNNB1 hotspot S37	185	6783	0.222651	-0.00749056	0.230141	0.728968	0.625018	0.366476	0.315708	0.368215	9.51583e-07	0.229621	0.789382	0.0572119	0.000235478	4	no differential activity	Oncogene	TRUE
PPARG	PIK3CA	PIK3CA 3D hotspot 5-1062-3hiz	519	6014	0.163568	-0.00262904	0.166197	0.839306	0.728701	0.225176	0.198018	0.228073	9.71205e-07	0.166714	0.586273	0.6313	9.35686e-05	4	deactivated in tumors	Oncogene	TRUE
ESR1	PIK3CA	PIK3CA p.1047	246	6014	0.232967	-0.00138062	0.234347	0.876316	0.735214	0.316154	0.267423	0.318747	9.94542e-07	0.238453	0.395284	0.654735	9.35686e-05	2	deactivated in tumors	Oncogene	TRUE
ESR1	TP53	TP53 DNA/RNA aff. disabling	467	4377	-0.0777915	0.0908228	-0.168614	0.709503	0.707762	-0.238179	0.237651	0.238236	9.95588e-07	-0.168219	0.0108898	6.53026e-08	0.000109288	3	deactivated in tumors	TSG	TRUE
ATF4	PIK3CA	PIK3CA interface PIK3R1	580	6014	-0.163562	0.0109602	-0.174522	0.877847	0.815221	-0.212595	0.198807	0.21408	1.00171e-06	-0.17591	0.0435103	0.390708	9.35686e-05	4	activated in tumors	Oncogene	TRUE
GATA2	KRAS	KRAS interface ZDHHC17	400	6615	0.197343	0.00241529	0.194928	0.811637	0.774487	0.250986	0.240166	0.251687	1.0207e-06	0.196509	0.239984	0.0341569	7.9154e-05	5	activated in tumors	Oncogene	TRUE
MYCN	EGFR	EGFR interface IRS1 // EGFR 3D hotspot 718-965-1k3a	26	6797	-0.727989	0.0182697	-0.746258	0.834411	0.75503	-0.987982	0.894353	0.988383	1.02204e-06	-0.726233	0.0976427	0.00266499	0.00112424	2	activated in tumors	Oncogene	TRUE
RUNX2	NRAS	NRAS interface RASA1	204	6936	-0.243176	0.0129835	-0.25616	0.632169	0.7166	-0.358598	0.405208	0.357466	1.03043e-06	-0.248111	0.000300288	0.0931523	9.49395e-05	5	no differential activity	Oncogene	TRUE
EZH2	HRAS	HRAS missense	78	7081	-0.452116	0.00343151	-0.455548	0.776738	0.815861	-0.558646	0.586488	0.558364	1.04988e-06	-0.453653	0.101325	0.730347	8.18558e-05	5	activated in tumors	Oncogene	TRUE
BACH1	HRAS	HRAS 3D hotspot 1-166-4nym	54	7081	-0.478626	0.0261146	-0.50474	0.793095	0.753897	-0.669243	0.636419	0.669508	1.04997e-06	-0.503344	0.0453139	0.789555	8.18558e-05	4	no differential activity	Oncogene	TRUE
ETS1	BRAF	BRAF interaction increasing MAP2K1 // BRAF p.V600E	457	6510	-0.180657	0.0135106	-0.194167	0.728648	0.804543	-0.242772	0.266476	0.241339	1.06375e-06	-0.190588	0.951089	0.00728468	2.00514e-05	3	activated in tumors	Oncogene	TRUE
ZEB1	TP53	TP53 missense	1991	4377	-0.0578758	0.0244498	-0.0823257	0.637202	0.619732	-0.131669	0.129199	0.132841	1.07105e-06	-0.0826504	0.411968	0.104623	0.000116695	3	no differential activity	TSG	TRUE
NFKB1	NRAS	NRAS p.Q61R	82	6936	-0.395181	0.0156148	-0.410796	0.844626	0.749661	-0.547126	0.486365	0.547976	1.10966e-06	-0.407011	0.674049	0.00172644	9.49395e-05	4	no differential activity	Oncogene	TRUE
EZH2	HRAS	HRAS interface RASA1	69	7081	-0.478842	0.00343151	-0.482274	0.798173	0.815861	-0.591243	0.604222	0.591122	1.12285e-06	-0.480843	0.103144	0.710699	8.23878e-05	5	activated in tumors	Oncogene	TRUE
EZH2	HRAS	HRAS interface NF1	70	7081	-0.474254	0.00343151	-0.477686	0.793297	0.815861	-0.585653	0.602153	0.585499	1.19692e-06	-0.476159	0.103815	0.706921	8.29435e-05	5	activated in tumors	Oncogene	TRUE
PPARG	PIK3CA	PIK3CA interaction increasing IRS1	426	6014	0.178495	-0.00262904	0.181124	0.852851	0.728701	0.245578	0.212375	0.248557	1.20525e-06	0.180941	0.520312	0.761104	0.00011064	4	deactivated in tumors	Oncogene	TRUE
FOXI1	KEAP1	KEAP1 missense	188	6941	-0.246308	0.0386362	-0.284945	0.748883	0.760999	-0.37459	0.380493	0.374435	1.21076e-06	-0.27367	0.0112403	0.139394	5.10789e-05	6	deactivated in tumors	Oncogene	TRUE
E2F7	NR4A2	NR4A2 missense	68	7068	0.373378	0.0101431	0.363235	0.579659	0.625416	0.581175	0.626636	0.58079	1.22035e-06	0.369631	0.0209072	0.00192587	0.000142725	4	activated in tumors	TSG	TRUE
MYC	CDH1	CDH1 truncating	122	6863	-0.325578	0.0179191	-0.343497	0.786184	0.729903	-0.469955	0.436917	0.470607	1.22486e-06	-0.32589	0.0595707	0.030475	7.65536e-05	3	activated in tumors	TSG	TRUE
ETS1	BRAF	BRAF hotspot S602	483	6510	-0.173997	0.0135106	-0.187507	0.737855	0.804543	-0.234348	0.254124	0.23306	1.23804e-06	-0.184504	0.966831	0.00724947	2.30401e-05	3	activated in tumors	Oncogene	TRUE
ETS1	BRAF	BRAF p.600	460	6510	-0.178755	0.0135106	-0.192265	0.732315	0.804543	-0.240336	0.262544	0.238975	1.24268e-06	-0.188818	0.958482	0.00699276	2.30401e-05	3	activated in tumors	Oncogene	TRUE
CEBPB	TP53	TP53 interface TP53BP2	568	4377	-0.115688	0.0526016	-0.16829	0.800286	0.779406	-0.215252	0.210287	0.215921	1.24999e-06	-0.169267	0.154209	0.840072	0.000134342	3	deactivated in tumors	TSG	TRUE
CEBPB	TP53	TP53 DNA/RNA aff. disabling	467	4377	-0.131545	0.0526016	-0.184146	0.780232	0.779406	-0.236241	0.236015	0.236265	1.25143e-06	-0.184165	0.148248	0.817413	0.000134342	3	deactivated in tumors	TSG	TRUE
MYC	CTNNB1	CTNNB1 hotspot S33	155	6783	0.282175	-0.00276975	0.284944	0.660321	0.733945	0.389061	0.431524	0.388237	1.25879e-06	0.288442	0.0282271	0.0072586	0.000295925	2	activated in tumors	Oncogene	TRUE
MYC	CTNNB1	CTNNB1 interface FBXW11	155	6783	0.282175	-0.00276975	0.284944	0.660321	0.733945	0.389061	0.431524	0.388237	1.25879e-06	0.288442	0.0282271	0.0072586	0.000295925	2	activated in tumors	Oncogene	TRUE
STAT6	GATA3	GATA3 truncating	107	6972	-0.320887	0.0129635	-0.333851	0.963096	0.784957	-0.42371	0.346643	0.425311	1.2795e-06	-0.373053	0.0353984	1.15335e-06	8.41629e-05	1	deactivated in tumors	TSG	TRUE
E2F1	EP300	EP300 missense	213	6892	0.22366	0.00994724	0.213713	0.60514	0.636775	0.336104	0.353163	0.335618	1.28579e-06	0.214483	0.022093	0.00045424	0.000250729	2	activated in tumors	TSG	TRUE
PPARD	KRAS	KRAS missense	543	6615	0.140776	-0.0158793	0.156655	0.708107	0.686972	0.2275	0.221231	0.228037	1.30643e-06	0.149557	0.234431	5.4763e-05	9.64875e-05	4	deactivated in tumors	Oncogene	TRUE
IRF1	CASP8	CASP8 truncating	67	7006	0.501345	0.00240582	0.498939	0.919561	0.833077	0.598301	0.542584	0.598911	1.32769e-06	0.495678	0.990613	0.0108474	0.000238984	1	no differential activity	TSG	TRUE
ATF3	FGFR3	FGFR3 interface FGF1 // FGFR3 3D hotspot 150-362-1ry7	23	7059	-0.785091	0.00699138	-0.792083	0.846281	0.78867	-1.00409	0.935957	1.00433	1.33437e-06	-0.798054	0.953335	0.346049	0.000278052	4	no differential activity	Oncogene	TRUE
FOSL2	TP53	TP53 interaction disrupting NRDC	115	4377	-0.233361	0.0667705	-0.300131	0.614329	0.659173	-0.456077	0.488551	0.455315	1.34638e-06	-0.301589	0.909034	0.11677	0.00014348	3	no differential activity	TSG	TRUE
ATF4	PIK3CA	PIK3CA 3D hotspot 8-1058-4l1b	547	6014	-0.166264	0.0109602	-0.177224	0.880645	0.815221	-0.215898	0.201243	0.217394	1.40245e-06	-0.178191	0.0330786	0.356215	0.00012656	4	activated in tumors	Oncogene	TRUE
EGR1	TP53	TP53 truncating	800	4377	-0.0982932	0.0655956	-0.163889	0.849463	0.851677	-0.192508	0.192932	0.192431	1.41048e-06	-0.158212	0.0134958	0.0821368	0.000149222	1	deactivated in tumors	TSG	TRUE
CREB1	NR4A2	NR4A2 missense	68	7068	0.507882	0.00959405	0.498288	0.883856	0.859823	0.579369	0.563766	0.579523	1.42725e-06	0.505562	0.00994452	0.101493	0.000142725	2	activated in tumors	TSG	TRUE
NFKB1	HRAS	HRAS hotspot Y64	30	7081	-0.649343	0.0104074	-0.659751	0.66605	0.751772	-0.877979	0.990543	0.877594	1.43933e-06	-0.662947	0.630208	0.000959907	8.95341e-05	3	no differential activity	Oncogene	TRUE
FOSL2	HRAS	HRAS interface AFDN	28	7081	-0.628841	0.00300466	-0.631845	0.606847	0.684702	-0.92318	1.04119	0.922804	1.44269e-06	-0.62505	0.0450771	0.172688	8.95341e-05	3	no differential activity	Oncogene	TRUE
RXRA	CTNNB1	CTNNB1 interface HLA-A	154	6783	-0.254896	0.00197157	-0.256867	0.53916	0.658403	-0.391562	0.476421	0.390137	1.45903e-06	-0.257792	0.546241	0.284481	0.000319259	1	deactivated in tumors	Oncogene	TRUE
PAX5	NRAS	NRAS p.Q61R	82	6936	-0.40827	0.0250869	-0.433357	0.868295	0.825908	-0.524385	0.499089	0.524703	1.47973e-06	-0.44274	0.0308423	0.0418512	0.000111381	4	deactivated in tumors	Oncogene	TRUE
ATF4	PIK3CA	PIK3CA interface PIK3R3	573	6014	-0.162142	0.0109602	-0.173102	0.879647	0.815221	-0.210839	0.196786	0.212338	1.48864e-06	-0.174109	0.0459736	0.364196	0.000132099	4	activated in tumors	Oncogene	TRUE
STAT1	CTNNB1	CTNNB1 hotspot S37	185	6783	-0.263947	0.0228475	-0.286794	0.723133	0.801814	-0.358567	0.3966	0.357682	1.49385e-06	-0.286909	0.804971	0.000224703	0.000319259	2	deactivated in tumors	Oncogene	TRUE
E2F1	TP53	TP53 interface TP53BP2	568	4377	0.0858127	-0.0480138	0.133827	0.615261	0.62954	0.213127	0.217512	0.212578	1.51104e-06	0.134636	0.139118	1.67072e-05	0.000158711	2	activated in tumors	TSG	TRUE
FOSL2	HRAS	HRAS hotspot Y64	30	7081	-0.60714	0.00300466	-0.610144	0.601187	0.684702	-0.891526	1.0149	0.89111	1.51463e-06	-0.602717	0.0462632	0.17542	8.95341e-05	3	no differential activity	Oncogene	TRUE
SMAD4	SMARCA4	SMARCA4 truncating	30	6895	-0.643656	0.0195231	-0.663179	0.540449	0.751016	-0.883936	1.22709	0.883043	1.51539e-06	-0.66002	0.000362933	0.0325538	0.000159116	3	deactivated in tumors	TSG	TRUE
RELA	NRAS	NRAS p.Q61R	82	6936	-0.370749	0.0121266	-0.382876	0.77563	0.70594	-0.541715	0.493632	0.542363	1.53853e-06	-0.378024	0.462894	0.00224381	0.000111381	4	no differential activity	Oncogene	TRUE
STAT3	HRAS	HRAS interface AFDN	28	7081	-0.640532	0.0112162	-0.651749	0.784367	0.721522	-0.902985	0.830923	0.903297	1.57914e-06	-0.656668	0.330197	0.0213555	8.95341e-05	3	deactivated in tumors	Oncogene	TRUE
E2F1	KEAP1	KEAP1 missense	188	6941	0.239489	0.0113	0.228189	0.692206	0.633482	0.3593	0.329654	0.360214	1.62172e-06	0.225638	0.0240598	0.0010253	6.43919e-05	2	activated in tumors	Oncogene	TRUE
HIF1A	CUL1	CUL1 missense	93	7053	0.36183	0.0106136	0.351216	0.888621	0.700287	0.499572	0.395237	0.501531	1.63899e-06	0.352645	0.721635	0.676216	0.000860471	3	activated in tumors	TSG	TRUE
MYC	ERCC2	ERCC2 missense	83	7073	0.390671	0.00359327	0.387077	0.628259	0.734811	0.527585	0.616111	0.526771	1.66223e-06	0.38828	0.0389878	0.00577369	0.000249335	3	activated in tumors	Oncogene	TRUE
CREB1	ATM	ATM missense	359	6712	0.217905	0.00286756	0.215038	0.879898	0.858481	0.250167	0.24439	0.250487	1.67546e-06	0.223624	0.00417504	0.167756	0.000326714	3	activated in tumors	TSG	TRUE
ATF4	TP53	TP53 hotspot S269	348	4377	0.0921247	-0.124476	0.216601	0.73196	0.818415	0.266626	0.295919	0.264659	1.67587e-06	0.2165	0.230831	4.38741e-06	0.000174766	3	activated in tumors	TSG	TRUE
CEBPB	TGFBR2	TGFBR2 p.E125fs // TGFBR2 p.E150fs	24	7035	0.789135	-0.0009747	0.790109	0.924121	0.781312	1.0106	0.854985	1.01126	1.68839e-06	0.766677	0.00287684	0.776033	0.000263566	2	deactivated in tumors	TSG	TRUE
E2F1	CARD11	CARD11 missense	213	6914	0.217927	0.00944322	0.208484	0.664195	0.634141	0.328292	0.31389	0.328766	1.69654e-06	0.211619	0.0135986	0.000273552	0.000211581	3	activated in tumors	Oncogene	TRUE
HIF1A	MLH1	MLH1 p.T254fs // MLH1 p.T397fs // MLH1 p.T495fs	10	7031	-1.05478	0.0133253	-1.06811	1.51249	0.701221	-1.51967	0.706193	1.52321	1.69911e-06	-1.06574	0.730699	0.554114	0.000509733	2	activated in tumors	TSG	TRUE
HNF1A	PDGFRA	PDGFRA missense	204	6938	-0.164343	0.00304959	-0.167392	0.522944	0.504604	-0.331382	0.320096	0.33173	1.70752e-06	-0.171972	0.0149975	0.229174	0.000192096	3	deactivated in tumors	Oncogene	TRUE
ELK1	HRAS	HRAS interface NF1	70	7081	0.412293	0.000784534	0.411509	0.674167	0.715323	0.575588	0.610396	0.575277	1.72447e-06	0.411057	0.357512	0.0639617	8.96366e-05	3	activated in tumors	Oncogene	TRUE
NFKB1	HRAS	HRAS 3D hotspot 1-166-1nvx	33	7081	-0.612612	0.0104074	-0.62302	0.706404	0.751772	-0.828953	0.881959	0.828735	1.75586e-06	-0.627029	0.608773	0.000830572	8.96366e-05	3	no differential activity	Oncogene	TRUE
PPARG	PIK3CA	PIK3CA 3D hotspot 8-1059-4l23	538	6014	0.157243	-0.00262904	0.159872	0.854879	0.728701	0.216085	0.187011	0.219393	1.76207e-06	0.160387	0.533917	0.618423	0.000153799	4	deactivated in tumors	Oncogene	TRUE
SOX2	NRAS	NRAS p.Q61R	82	6936	0.381	-0.0126403	0.393641	0.892164	0.73026	0.537516	0.44122	0.539042	1.76274e-06	0.389575	0.538723	0.0208373	0.000118497	6	deactivated in tumors	Oncogene	TRUE
PPARG	PIK3CA	PIK3CA 3D hotspot 2-1061-4jps	543	6014	0.155823	-0.00262904	0.158452	0.849324	0.728701	0.214292	0.186562	0.217444	1.81026e-06	0.159471	0.583024	0.539431	0.000155457	4	deactivated in tumors	Oncogene	TRUE
STAT3	HRAS	HRAS hotspot Y64	30	7081	-0.612917	0.0112162	-0.624133	0.763483	0.721522	-0.864812	0.817482	0.865024	1.85235e-06	-0.630214	0.330589	0.0207456	8.96366e-05	3	deactivated in tumors	Oncogene	TRUE
ATF4	TP53	TP53 interaction ZNF385A loss	109	4377	0.249771	-0.124476	0.374248	0.867963	0.818415	0.456598	0.431179	0.457283	1.86414e-06	0.378434	0.35057	4.67811e-07	0.000193021	3	activated in tumors	TSG	TRUE
EZH2	HRAS	HRAS 3D hotspot 1-166-1wq1	69	7081	-0.468639	0.00343151	-0.472071	0.797706	0.815861	-0.578738	0.591785	0.578616	1.87818e-06	-0.470684	0.104925	0.702562	8.96366e-05	5	activated in tumors	Oncogene	TRUE
EZH2	CTNNB1	CTNNB1 hotspot S29	117	6783	-0.357204	0.00717377	-0.364378	0.774987	0.814979	-0.447462	0.470173	0.447102	1.89256e-06	-0.362161	0.138022	0.979607	0.000376079	4	activated in tumors	Oncogene	TRUE
FOXM1	TP53	TP53 p.R249S	23	4377	0.495481	-0.0786171	0.574098	0.584951	0.571004	1.00529	0.981446	1.00542	1.92796e-06	0.565797	0.00598809	2.5276e-12	0.000198223	2	activated in tumors	TSG	TRUE
SMAD3	STK11	STK11 interface RPS6KB1	10	7032	-1.2305	0.0246392	-1.25514	1.14692	0.828691	-1.51372	1.09436	1.5146	1.93114e-06	-1.2478	0.000151911	0.000220308	0.000310199	3	deactivated in tumors	TSG	TRUE
MYC	CTNNB1	CTNNB1 interface HLA-A	154	6783	0.278025	-0.00276975	0.280794	0.660444	0.733945	0.383388	0.42516	0.382582	1.93719e-06	0.284201	0.0285183	0.00705465	0.000376079	2	activated in tumors	Oncogene	TRUE
E2F4	TRIO	TRIO truncating	45	6905	0.471666	0.00662212	0.465044	0.80176	0.687124	0.676024	0.580029	0.676797	1.97176e-06	0.489416	0.000317177	5.58006e-05	0.000369704	4	activated in tumors	Oncogene	TRUE
STAT3	HRAS	HRAS p.Q61R	15	7081	-0.868828	0.0112162	-0.880044	0.651555	0.721522	-1.21993	1.35068	1.2197	1.99461e-06	-0.887332	0.266839	0.0206634	8.96366e-05	3	deactivated in tumors	Oncogene	TRUE
STAT1	CTNNB1	CTNNB1 hotspot S33	155	6783	-0.28484	0.0228475	-0.307688	0.689705	0.801814	-0.384853	0.446115	0.38374	1.99968e-06	-0.308786	0.835116	0.000207561	0.000376079	2	deactivated in tumors	Oncogene	TRUE
STAT1	CTNNB1	CTNNB1 interface FBXW11	155	6783	-0.28484	0.0228475	-0.307688	0.689705	0.801814	-0.384853	0.446115	0.38374	1.99968e-06	-0.308786	0.835116	0.000207561	0.000376079	2	deactivated in tumors	Oncogene	TRUE
CEBPB	TP53	TP53 3D hotspot 97-287-1ycs	581	4377	-0.110745	0.0526016	-0.163347	0.798097	0.779406	-0.208986	0.204671	0.209579	2.01944e-06	-0.164204	0.166331	0.851954	0.000206177	3	deactivated in tumors	TSG	TRUE
STAT6	KEAP1	KEAP1 missense	188	6941	-0.277364	0.0177739	-0.295138	0.845222	0.787215	-0.374165	0.349184	0.374914	2.03451e-06	-0.277458	0.0549717	3.88053e-05	7.62942e-05	4	deactivated in tumors	Oncogene	TRUE
ATF3	FGFR3	FGFR3 p.S249C // FGFR3 p.249	19	7059	-0.849194	0.00699138	-0.856186	0.910195	0.78867	-1.08515	0.940661	1.08561	2.03627e-06	-0.862459	0.959184	0.346433	0.000278052	4	no differential activity	Oncogene	TRUE
EGR1	GATA3	GATA3 truncating	107	6972	0.42282	0.0164812	0.406339	0.802383	0.843953	0.481818	0.506415	0.481471	2.0401e-06	0.392116	0.00507996	0.281135	0.000120774	3	deactivated in tumors	TSG	TRUE
STAT3	HRAS	HRAS 3D hotspot 1-166-1nvx	33	7081	-0.581822	0.0112162	-0.593038	0.772324	0.721522	-0.821657	0.767862	0.821926	2.0456e-06	-0.598465	0.344359	0.0187142	8.96366e-05	3	deactivated in tumors	Oncogene	TRUE
YY1	NR4A2	NR4A2 missense	68	7068	0.461086	0.00491454	0.456172	0.764012	0.79552	0.573635	0.597074	0.573426	2.0571e-06	0.460276	0.958	0.00116726	0.000166559	4	activated in tumors	TSG	TRUE
ELK1	HRAS	HRAS 3D hotspot 1-166-1wq1	69	7081	0.412282	0.000784534	0.411498	0.679106	0.715323	0.575532	0.60594	0.575262	2.08397e-06	0.410715	0.357386	0.0639411	8.96366e-05	3	activated in tumors	Oncogene	TRUE
ESR1	PIK3CA	PIK3CA p.H1047R	208	6014	0.243867	-0.00138062	0.245247	0.879198	0.735214	0.331211	0.278944	0.333572	2.08801e-06	0.250248	0.43729	0.569835	0.000175765	2	deactivated in tumors	Oncogene	TRUE
CEBPB	TP53	TP53 truncating	800	4377	-0.0864421	0.0526016	-0.139044	0.782529	0.779406	-0.178287	0.177685	0.178397	2.11142e-06	-0.142562	0.048376	0.455372	0.00021407	3	deactivated in tumors	TSG	TRUE
ATF4	PIK3CA	PIK3CA 3D hotspot 5-1062-3hiz	519	6014	-0.166985	0.0109602	-0.177945	0.87847	0.815221	-0.216896	0.202562	0.218278	2.11276e-06	-0.179364	0.031615	0.363231	0.000175765	4	activated in tumors	Oncogene	TRUE
ZEB1	CTNNB1	CTNNB1 hotspot S33	155	6783	0.235413	-0.00749056	0.242904	0.738269	0.625018	0.386941	0.329018	0.388635	2.12284e-06	0.242021	0.724244	0.069289	0.000383885	4	no differential activity	Oncogene	TRUE
ZEB1	CTNNB1	CTNNB1 interface FBXW11	155	6783	0.235413	-0.00749056	0.242904	0.738269	0.625018	0.386941	0.329018	0.388635	2.12284e-06	0.242021	0.724244	0.069289	0.000383885	4	no differential activity	Oncogene	TRUE
E2F4	CARD11	CARD11 truncating	35	6914	0.537193	0.00464437	0.532549	0.575129	0.686634	0.77616	0.925964	0.775593	2.12843e-06	0.551093	0.000342907	0.000203243	0.000211581	4	activated in tumors	Oncogene	TRUE
SMAD3	CARD11	CARD11 p.R555fs	20	6914	-0.87044	0.0234048	-0.893845	0.739474	0.831394	-1.07542	1.20876	1.07512	2.19418e-06	-0.881363	0.000209767	0.000158981	0.000211581	4	deactivated in tumors	Oncogene	TRUE
ATF4	PIK3CA	PIK3CA 3D hotspot 8-1053-4l2y	547	6014	-0.163017	0.0109602	-0.173977	0.883505	0.815221	-0.211877	0.196917	0.213411	2.21413e-06	-0.174831	0.0346202	0.339042	0.000181364	4	activated in tumors	Oncogene	TRUE
MYCN	NR4A2	NR4A2 missense	68	7068	0.440288	0.00952324	0.430765	0.951811	0.757622	0.567037	0.452574	0.568575	2.22078e-06	0.438133	0.0671038	0.000591548	0.000166559	3	activated in tumors	TSG	TRUE
STAT2	TGFBR2	TGFBR2 truncating	43	7035	0.612926	-0.00215845	0.615085	1.15611	0.828546	0.740289	0.532032	0.742366	2.22262e-06	0.602174	0.193683	0.00367579	0.000263566	4	activated in tumors	TSG	TRUE
GABPA	CDH1	CDH1 truncating	122	6863	-0.336086	0.00970248	-0.345789	0.869797	0.778838	-0.443033	0.397551	0.443981	2.24093e-06	-0.339428	0.285445	0.288273	0.000129285	4	activated in tumors	TSG	TRUE
PAX5	NRAS	NRAS missense	221	6936	-0.239878	0.0250869	-0.264965	0.777857	0.825908	-0.321375	0.340634	0.320816	2.34421e-06	-0.266238	0.0592622	0.0742764	0.000140528	4	deactivated in tumors	Oncogene	TRUE
PAX6	HRAS	HRAS interface RASGRF1 // HRAS 3D hotspot 1-166-1xd2 // HRAS 3D hotspot 1-166-4nyi	70	7081	-0.399857	0.0108213	-0.410678	0.608963	0.721289	-0.570158	0.67439	0.569368	2.36019e-06	-0.408546	0.0168926	0.28053	9.33452e-05	4	deactivated in tumors	Oncogene	TRUE
STAT3	HRAS	HRAS 3D hotspot 5-164-1nvw	29	7081	-0.617755	0.0112162	-0.628971	0.779939	0.721522	-0.87144	0.806437	0.871729	2.38637e-06	-0.634036	0.337725	0.0208139	9.33452e-05	3	deactivated in tumors	Oncogene	TRUE
E2F4	TP53	TP53 interface TP53BP1 // TP53 3D hotspot 95-289-1kzy // TP53 3D hotspot 95-292-1gzh	353	4377	0.112625	-0.0647709	0.177396	0.672688	0.668715	0.265161	0.263712	0.265278	2.3874e-06	0.17458	0.0146664	2.17563e-07	0.000240382	2	activated in tumors	TSG	TRUE
NFKB1	NRAS	NRAS interface RASA1	204	6936	-0.241051	0.0156148	-0.256665	0.804475	0.749661	-0.34164	0.319047	0.342375	2.3891e-06	-0.25203	0.587028	0.00170659	0.000140528	4	no differential activity	Oncogene	TRUE
JUN	FGFR3	FGFR3 interface FGF1 // FGFR3 3D hotspot 150-362-1ry7	23	7059	-0.71091	0.00984792	-0.720758	0.608948	0.715065	-1.00839	1.18361	1.00796	2.43836e-06	-0.704665	0.259416	0.0349245	0.000278052	3	deactivated in tumors	Oncogene	TRUE
TCF3	CTNNB1	CTNNB1 hotspot S29	117	6783	-0.350486	0.0257786	-0.376265	0.772729	0.847531	-0.444585	0.48693	0.443954	2.46703e-06	-0.372021	0.015364	0.40902	0.000428475	5	deactivated in tumors	Oncogene	TRUE
E2F6	FGFR3	FGFR3 interface FGF8 // FGFR3 3D hotspot 150-357-2fdb	26	7059	0.760659	0.00786919	0.75279	0.981561	0.804574	0.934833	0.766932	0.935639	2.47157e-06	0.746743	0.381761	0.21024	0.000278052	4	activated in tumors	Oncogene	TRUE
NR3C1	MMP2	MMP2 interface APP	5	7064	1.69186	0.0121651	1.6797	0.410427	0.797307	2.10715	4.09257	2.10671	2.48537e-06	1.68068	0.114544	0.39461	0.000745611	2	deactivated in tumors	Oncogene	TRUE
PAX6	HRAS	HRAS interface SOS2	69	7081	-0.401592	0.0108213	-0.412413	0.61325	0.721289	-0.572528	0.672504	0.571773	2.48904e-06	-0.410544	0.016857	0.279616	9.33452e-05	4	deactivated in tumors	Oncogene	TRUE
FOXM1	PIK3CA	PIK3CA 3D hotspot 2-1061-4jps	543	6014	-0.109087	0.0243339	-0.133421	0.613025	0.567746	-0.233407	0.217644	0.235002	2.50597e-06	-0.121443	0.0138027	0.00155531	0.000202159	3	activated in tumors	Oncogene	TRUE
E2F1	PTEN	PTEN p.R130G	27	6484	-0.587223	0.0144529	-0.601676	0.481586	0.631497	-0.953574	1.24936	0.952777	2.5387e-06	-0.573886	0.0102906	0.0080799	0.00143676	2	activated in tumors	TSG	TRUE
NR3C1	KRAS	KRAS activitygain	114	6615	0.344952	0.000611218	0.344341	0.940689	0.784239	0.437467	0.366052	0.439077	2.53936e-06	0.350639	0.0403298	0.55074	0.000179022	4	deactivated in tumors	Oncogene	TRUE
PAX6	HRAS	HRAS missense	78	7081	-0.378092	0.0108213	-0.388913	0.626479	0.721289	-0.539906	0.620792	0.539192	2.5458e-06	-0.386021	0.0168653	0.279826	9.33452e-05	4	deactivated in tumors	Oncogene	TRUE
RUNX2	BRAF	BRAF p.600	460	6510	0.144019	-0.00236164	0.146381	0.635192	0.719615	0.204911	0.230451	0.203415	2.55088e-06	0.163428	2.15424e-05	0.211222	4.69107e-05	4	no differential activity	Oncogene	TRUE
ATF4	CTNNB1	CTNNB1 interface HLA-A	154	6783	-0.32299	-0.00817931	-0.31481	0.807562	0.826921	-0.380896	0.389828	0.380702	2.55167e-06	-0.316931	0.0295437	0.00919804	0.000428475	3	activated in tumors	Oncogene	TRUE
ATF4	TP53	TP53 interaction increasing VRK1 // TP53 p.R175H	108	4377	0.245589	-0.124476	0.370065	0.870905	0.818415	0.45146	0.42492	0.452173	2.57475e-06	0.374942	0.351959	4.8996e-07	0.000257469	3	activated in tumors	TSG	TRUE
EZH2	HRAS	HRAS interface SOS2	69	7081	-0.462138	0.00343151	-0.465569	0.797137	0.815861	-0.570771	0.584052	0.570648	2.57813e-06	-0.464316	0.106772	0.689043	9.33452e-05	5	activated in tumors	Oncogene	TRUE
GATA2	SMARCA4	SMARCA4 truncating	30	6895	-0.651439	0.0202666	-0.671706	0.948507	0.776895	-0.863717	0.708172	0.864604	2.60649e-06	-0.669134	0.457184	0.0259026	0.000228068	6	activated in tumors	TSG	TRUE
ELK1	HRAS	HRAS interface SOS2	69	7081	0.407801	0.000784534	0.407016	0.68031	0.715323	0.569255	0.598281	0.568996	2.6192e-06	0.406687	0.35738	0.0683269	9.33452e-05	3	activated in tumors	Oncogene	TRUE
STAT2	TGFBR2	TGFBR2 p.E125fs // TGFBR2 p.E150fs	24	7035	0.816449	-0.00215845	0.818608	1.24499	0.828546	0.985986	0.65752	0.988005	2.63566e-06	0.79875	0.272881	0.00294324	0.000263566	4	activated in tumors	TSG	TRUE
TP53	PTEN	PTEN p.L265fs	15	6484	0.895108	-0.00407514	0.899183	0.732134	0.735275	1.22293	1.22817	1.22292	2.74064e-06	0.892486	0.715133	0.153025	0.00143676	1	deactivated in tumors	TSG	TRUE
ESR1	PIK3CA	PIK3CA 3D hotspot 5-1062-3hhm	513	6014	0.158264	-0.00138062	0.159644	0.772263	0.735214	0.216265	0.206723	0.21714	2.75183e-06	0.160491	0.50065	0.884959	0.00021868	2	deactivated in tumors	Oncogene	TRUE
PAX6	STK11	STK11 missense	69	7032	-0.402105	0.0127813	-0.414887	0.714537	0.718857	-0.577181	0.580637	0.577148	2.77636e-06	-0.407998	0.0263498	0.287221	0.000371639	4	deactivated in tumors	TSG	TRUE
NR1I2	AXIN2	AXIN2 p.G665fs	24	7041	0.729383	-0.00451571	0.733898	0.675038	0.766103	0.958313	1.0872	0.957964	2.7774e-06	0.735329	0.843376	0.932598	0.000312458	4	deactivated in tumors	TSG	TRUE
MYB	TP53	TP53 p.273	215	4377	-0.231993	0.0109398	-0.242933	0.770898	0.745222	-0.325456	0.31513	0.325988	2.77749e-06	-0.244925	0.278146	0.899594	0.000275854	4	deactivated in tumors	TSG	TRUE
PAX6	HRAS	HRAS 3D hotspot 1-166-4nym	54	7081	-0.451765	0.0108213	-0.462586	0.59501	0.721289	-0.642095	0.777442	0.641333	2.78187e-06	-0.461406	0.0176697	0.27816	9.53586e-05	4	deactivated in tumors	Oncogene	TRUE
FOXM1	PIK3CA	PIK3CA interface PIK3R3	573	6014	-0.10563	0.0243339	-0.129964	0.615383	0.567746	-0.227193	0.211191	0.228912	2.8304e-06	-0.117926	0.0118159	0.000981134	0.000221616	3	activated in tumors	Oncogene	TRUE
PBX1	CREBBP	CREBBP missense	282	6820	-0.180563	0.0152387	-0.195802	0.682884	0.659128	-0.296632	0.286728	0.297062	2.86244e-06	-0.188331	0.0328262	0.00601928	0.000918964	4	deactivated in tumors	TSG	TRUE
GABPA	TP53	TP53 3D hotspot 96-288-2mej	501	4377	0.115824	-0.0556262	0.17145	0.81457	0.759521	0.224016	0.210479	0.225735	2.87529e-06	0.169118	0.115769	0.0141492	0.000283638	4	activated in tumors	TSG	TRUE
PAX6	HRAS	HRAS 3D hotspot 5-164-1bkd	53	7081	-0.455002	0.0108213	-0.465824	0.600224	0.721289	-0.646547	0.776084	0.645822	2.88317e-06	-0.465008	0.0176151	0.276735	9.53586e-05	4	deactivated in tumors	Oncogene	TRUE
NFE2L2	AXIN1	AXIN1 truncating	33	7061	-0.591026	0.0247468	-0.615773	0.764917	0.748731	-0.822341	0.805019	0.822422	2.91037e-06	-0.611554	0.0454841	0.652497	0.000654834	3	activated in tumors	TSG	TRUE
STAT3	HRAS	HRAS interface RAPGEF2 // HRAS 3D hotspot 5-162-3cf6	31	7081	-0.59051	0.0112162	-0.601726	0.760947	0.721522	-0.833771	0.790759	0.833968	2.92084e-06	-0.607927	0.338179	0.0202262	9.53586e-05	3	deactivated in tumors	Oncogene	TRUE
ATF1	TP53	TP53 3D hotspot 97-287-1ycs	581	4377	0.118465	-0.0329488	0.151414	0.74102	0.74829	0.202576	0.204331	0.202346	2.96677e-06	0.153989	1.80462e-06	0.00336015	0.000290698	2	activated in tumors	TSG	TRUE
ZEB1	CTNNB1	CTNNB1 interface HLA-A	154	6783	0.232575	-0.00749056	0.240066	0.739829	0.625018	0.382406	0.324488	0.384094	2.97826e-06	0.239256	0.721988	0.0704554	0.000482861	4	no differential activity	Oncogene	TRUE
ESR1	HRAS	HRAS 3D hotspot 1-166-4nym	54	7081	-0.450548	0.0248029	-0.475351	0.697706	0.744719	-0.638586	0.681306	0.638296	2.98149e-06	-0.475352	0.344344	0.0379326	9.53586e-05	2	deactivated in tumors	Oncogene	TRUE
CREB1	KIT	KIT missense	228	6919	0.270216	0.005943	0.264273	0.901931	0.858919	0.307181	0.293008	0.307681	3.00835e-06	0.270812	0.00805964	0.150198	0.00508338	3	activated in tumors	Oncogene	TRUE
PBX1	NR4A2	NR4A2 missense	68	7068	-0.363354	0.0121264	-0.37548	0.662944	0.658926	-0.569804	0.566383	0.569837	3.03012e-06	-0.374975	0.0199093	0.00601075	0.000202008	5	deactivated in tumors	TSG	TRUE
TP53	PIK3CA	PIK3CA missense	1097	6014	0.107223	-0.0105714	0.117794	0.772827	0.735431	0.158898	0.15242	0.16017	3.05904e-06	0.115184	0.642751	0.306608	0.000236046	2	deactivated in tumors	Oncogene	TRUE
E2F4	TP53	TP53 hotspot S183	130	4377	0.211996	-0.0647709	0.276767	0.675234	0.668715	0.413763	0.409883	0.413879	3.07561e-06	0.277375	0.0601066	7.10963e-07	0.000299353	2	activated in tumors	TSG	TRUE
SOX2	NRAS	NRAS interface RASA1	204	6936	0.234992	-0.0126403	0.247632	0.842852	0.73026	0.337512	0.293803	0.339102	3.12348e-06	0.243347	0.282634	0.035405	0.000172918	6	deactivated in tumors	Oncogene	TRUE
MYCN	ATM	ATM missense	359	6712	0.191454	0.00359379	0.18786	0.819239	0.755893	0.247436	0.229311	0.248528	3.12571e-06	0.192205	0.0358548	0.000616359	0.000507928	3	activated in tumors	TSG	TRUE
E2F1	TP53	TP53 interface PPP1R13L	587	4377	0.079879	-0.0480138	0.127893	0.606397	0.62954	0.204024	0.210906	0.203153	3.17896e-06	0.128293	0.132353	1.11898e-05	0.000307364	2	activated in tumors	TSG	TRUE
RUNX2	BRAF	BRAF interaction increasing MAP2K1 // BRAF p.V600E	457	6510	0.142886	-0.00236164	0.145248	0.635617	0.719615	0.20331	0.228515	0.201841	3.18075e-06	0.162391	2.16367e-05	0.207992	5.80221e-05	4	no differential activity	Oncogene	TRUE
EZH2	HRAS	HRAS 3D hotspot 1-166-4nyj	69	7081	-0.457841	0.00343151	-0.461272	0.799372	0.815861	-0.565488	0.577043	0.565381	3.19129e-06	-0.460009	0.106782	0.697946	9.73505e-05	5	activated in tumors	Oncogene	TRUE
FOSL2	HRAS	HRAS 3D hotspot 1-166-1nvx	33	7081	-0.55914	0.00300466	-0.562144	0.602152	0.684702	-0.821425	0.93356	0.821006	3.23516e-06	-0.556269	0.0429989	0.177996	9.73505e-05	3	no differential activity	Oncogene	TRUE
E2F1	CREBBP	CREBBP missense	282	6820	0.18331	0.009315	0.173995	0.681719	0.633031	0.273995	0.255229	0.27486	3.23809e-06	0.180138	0.0193829	0.000365037	0.000918964	2	activated in tumors	TSG	TRUE
GLI2	EP300	EP300 truncating	65	6892	-0.42906	0.0137444	-0.442804	0.690356	0.753145	-0.588373	0.641414	0.58794	3.25304e-06	-0.436735	0.00267218	0.767223	0.000528619	5	deactivated in tumors	TSG	TRUE
E2F7	TP53	TP53 p.249	39	4377	0.435155	-0.0438711	0.479026	0.653392	0.63579	0.753252	0.733138	0.753434	3.27501e-06	0.475602	0.00726402	0.000119706	0.000314567	3	activated in tumors	TSG	TRUE
EZH2	HRAS	HRAS interface RASGRF1 // HRAS 3D hotspot 1-166-1xd2 // HRAS 3D hotspot 1-166-4nyi	70	7081	-0.454144	0.00343151	-0.457575	0.794161	0.815861	-0.560992	0.576175	0.56085	3.2779e-06	-0.456172	0.107512	0.694836	9.73505e-05	5	activated in tumors	Oncogene	TRUE
STAT2	FBXW7	FBXW7 p.465	53	6806	0.53789	-0.0010327	0.538923	1.01826	0.820633	0.655377	0.52926	0.656716	3.29732e-06	0.528385	0.278157	0.0529778	0.00296759	3	activated in tumors	TSG	TRUE
ATF3	FGFR3	FGFR3 interface FGF8 // FGFR3 3D hotspot 150-357-2fdb	26	7059	-0.709407	0.00699138	-0.716398	0.958028	0.78867	-0.907601	0.747784	0.908362	3.31227e-06	-0.722693	0.921954	0.340931	0.000319398	4	no differential activity	Oncogene	TRUE
E2F1	FN1	FN1 missense	223	6911	0.210644	0.0113291	0.199315	0.635006	0.635057	0.313854	0.313879	0.313854	3.33763e-06	0.201543	0.0232175	0.000906369	0.000500645	4	activated in tumors	TSG	TRUE
FOXM1	PIK3CA	PIK3CA interface PIK3R1	580	6014	-0.1037	0.0243339	-0.128034	0.612585	0.567746	-0.223904	0.209006	0.225513	3.41498e-06	-0.116231	0.0112494	0.000967625	0.000259747	3	activated in tumors	Oncogene	TRUE
SMAD3	SMARCA4	SMARCA4 truncating	30	6895	-0.685496	0.0257305	-0.711226	0.624478	0.832619	-0.854988	1.13891	0.854204	3.42074e-06	-0.706066	0.000125271	0.00041469	0.000256555	3	deactivated in tumors	TSG	TRUE
PPARG	PIK3CA	PIK3CA 3D hotspot 8-1058-4l1b	547	6014	0.151566	-0.00262904	0.154195	0.85181	0.728701	0.208447	0.18102	0.211602	3.50566e-06	0.154439	0.528125	0.670792	0.000259977	4	deactivated in tumors	Oncogene	TRUE
FOXI1	BRAF	BRAF interaction increasing MAP2K1 // BRAF p.V600E	457	6510	0.20407	0.0191465	0.184923	0.694831	0.764593	0.243249	0.266141	0.241858	3.50946e-06	0.172192	0.0229958	0.138718	6.35062e-05	5	deactivated in tumors	Oncogene	TRUE
SP1	HRAS	HRAS hotspot Y64	30	7081	-0.611497	0.0152871	-0.626784	0.707805	0.738274	-0.849126	0.885532	0.848986	3.51528e-06	-0.627122	0.729426	0.317197	0.000101972	3	no differential activity	Oncogene	TRUE
PPARG	PIK3CA	PIK3CA interface PIK3R3	573	6014	0.14878	-0.00262904	0.151409	0.847773	0.728701	0.204661	0.178597	0.20778	3.51565e-06	0.151234	0.472801	0.709225	0.000259977	4	deactivated in tumors	Oncogene	TRUE
MYC	CTNNB1	CTNNB1 hotspot S37	185	6783	0.247166	-0.00276975	0.249935	0.674598	0.733945	0.341237	0.370495	0.340537	3.52821e-06	0.253227	0.0347539	0.00685978	0.000537193	2	activated in tumors	Oncogene	TRUE
E2F4	B2M	B2M truncating	55	7073	0.435472	0.0117257	0.423747	0.570596	0.690281	0.614614	0.742639	0.613876	3.53918e-06	0.432479	0.000907315	7.97608e-05	0.0034507	3	activated in tumors	TSG	TRUE
MYB	CTNNB1	CTNNB1 CSNK2A1 phosphorylation loss	113	6783	0.326802	-0.0120939	0.338896	0.823038	0.765796	0.441984	0.411762	0.442541	3.54188e-06	0.337544	0.221537	0.813534	0.000537193	4	deactivated in tumors	Oncogene	TRUE
RELA	NRAS	NRAS interface RASA1	204	6936	-0.225759	0.0121266	-0.237885	0.743715	0.70594	-0.336451	0.319861	0.336976	3.56408e-06	-0.233061	0.387209	0.00219842	0.000186348	4	no differential activity	Oncogene	TRUE
FOSL2	HRAS	HRAS interface RAPGEF2 // HRAS 3D hotspot 5-162-3cf6	31	7081	-0.575043	0.00300466	-0.578048	0.617506	0.684702	-0.844565	0.9361	0.844233	3.63217e-06	-0.571011	0.0437953	0.17997	0.000102969	3	no differential activity	Oncogene	TRUE
GATA2	TP53	TP53 truncating	800	4377	-0.0883582	0.0488453	-0.137204	0.872846	0.740599	-0.179935	0.157191	0.18526	3.70259e-06	-0.136052	0.648748	0.589112	0.000353312	5	activated in tumors	TSG	TRUE
RELA	CASP8	CASP8 missense	92	7006	0.347197	-0.00138208	0.348579	0.737704	0.707548	0.492383	0.472519	0.492658	3.74305e-06	0.343961	0.541653	0.00219982	0.000561458	3	no differential activity	TSG	TRUE
ESR1	PIK3CA	PIK3CA interaction increasing IRS1	426	6014	0.170416	-0.00138062	0.171797	0.793743	0.735214	0.232402	0.216439	0.233669	3.7498e-06	0.172747	0.468926	0.886704	0.000273493	2	deactivated in tumors	Oncogene	TRUE
CREB1	TP53	TP53 truncating	800	4377	0.122483	-0.0279068	0.15039	0.865588	0.874831	0.172187	0.173743	0.171908	3.75297e-06	0.155609	0.00252233	0.677788	0.000355794	2	activated in tumors	TSG	TRUE
NFKB1	HRAS	HRAS 3D hotspot 5-163-4lwz // HRAS p.61	27	7081	-0.659719	0.0104074	-0.670126	0.686955	0.751772	-0.891665	0.975502	0.891396	3.75853e-06	-0.670417	0.614401	0.00096985	0.000104183	3	no differential activity	Oncogene	TRUE
ETS1	CTNNB1	CTNNB1 missense	354	6783	0.19878	-0.00713745	0.205917	0.757283	0.804624	0.256644	0.271916	0.255917	3.7857e-06	0.202625	0.755183	0.00542214	0.000540902	4	activated in tumors	Oncogene	TRUE
STAT1	CTNNB1	CTNNB1 interface HLA-A	154	6783	-0.27745	0.0228475	-0.300298	0.68577	0.801814	-0.375637	0.437898	0.374523	3.79643e-06	-0.301175	0.829994	0.000194792	0.000540902	2	deactivated in tumors	Oncogene	TRUE
E2F4	KIT	KIT missense	228	6919	0.215858	0.00751648	0.208342	0.719563	0.68828	0.302253	0.289539	0.302699	3.8195e-06	0.214435	0.000775203	9.91776e-05	0.00508338	2	activated in tumors	Oncogene	TRUE
MYC	EGFR	EGFR activitygain	33	6797	-0.589012	0.0146296	-0.603641	0.807655	0.729126	-0.827458	0.7474	0.827898	3.83038e-06	-0.588852	0.0691801	0.0157377	0.00337071	2	activated in tumors	Oncogene	TRUE
ELK1	HRAS	HRAS interface RASA1	69	7081	0.401275	0.000784534	0.40049	0.672727	0.715323	0.560181	0.595324	0.559874	3.86105e-06	0.399727	0.352753	0.0620147	0.000104698	3	activated in tumors	Oncogene	TRUE
JUND	KRAS	KRAS p.G12D	117	6615	0.240271	-0.0107912	0.251062	0.52786	0.600997	0.418568	0.475622	0.417743	3.86638e-06	0.258816	0.00403517	0.25311	0.000260724	4	deactivated in tumors	Oncogene	TRUE
REL	FGFR3	FGFR3 p.S249C // FGFR3 p.249	19	7059	-0.87908	-0.000967097	-0.878112	0.779244	0.814906	-1.07768	1.12688	1.07756	3.87911e-06	-0.865422	0.144993	0.0106864	0.0003273	6	deactivated in tumors	Oncogene	TRUE
LEF1	PIK3CA	PIK3CA interaction increasing IRS1	426	6014	0.189744	0.00113585	0.188609	0.808806	0.777714	0.241866	0.233194	0.242517	3.89273e-06	0.181852	0.392515	0.0284091	0.000280082	4	deactivated in tumors	Oncogene	TRUE
GABPA	CIC	CIC truncating	86	6893	0.388009	-0.00492805	0.392937	0.718838	0.784831	0.501156	0.546628	0.500664	3.90448e-06	0.392951	0.227153	0.0523923	0.00263552	5	activated in tumors	TSG	TRUE
YY1	NCOR2	NCOR2 missense	99	6980	0.382558	0.00532474	0.377233	0.763954	0.795928	0.474212	0.49379	0.473954	3.92964e-06	0.371962	0.857138	0.00299837	0.000589445	4	activated in tumors	Oncogene	TRUE
NFKB1	NRAS	NRAS missense	221	6936	-0.224787	0.0156148	-0.240402	0.808671	0.749661	-0.319877	0.29728	0.320681	3.98784e-06	-0.237008	0.590934	0.00130409	0.000189305	4	no differential activity	Oncogene	TRUE
FOSL2	HRAS	HRAS 3D hotspot 5-164-1nvw	29	7081	-0.591112	0.00300466	-0.594116	0.629596	0.684702	-0.867965	0.943647	0.867701	4.00052e-06	-0.587747	0.0423119	0.177988	0.000106172	3	no differential activity	Oncogene	TRUE
E2F4	MEN1	MEN1 truncating	36	7065	0.529862	0.0100624	0.5198	0.791596	0.68894	0.753897	0.656648	0.754492	4.012e-06	0.530746	0.000552232	4.32916e-05	0.0018054	2	activated in tumors	TSG	TRUE
E2F1	CARD11	CARD11 p.R555fs	20	6914	0.636403	0.00944322	0.62696	0.355273	0.634141	0.989606	1.76473	0.988675	4.13808e-06	0.653862	0.0152386	0.000567057	0.000316194	3	activated in tumors	Oncogene	TRUE
STAT3	NRAS	NRAS p.Q61R	82	6936	-0.350777	0.0157011	-0.366478	0.790169	0.721465	-0.507379	0.463797	0.507963	4.14063e-06	-0.370139	0.251529	0.0226561	0.000189305	4	deactivated in tumors	Oncogene	TRUE
E2F7	TP53	TP53 interface TP53BP1 // TP53 3D hotspot 95-289-1kzy // TP53 3D hotspot 95-292-1gzh	353	4377	0.117893	-0.0438711	0.161764	0.599781	0.63579	0.255479	0.269706	0.25443	4.20849e-06	0.16132	0.00683472	0.000154829	0.000396404	3	activated in tumors	TSG	TRUE
FOSL2	NRAS	NRAS p.61	159	6936	-0.253696	0.00329504	-0.256991	0.712674	0.685535	-0.37454	0.360601	0.374877	4.22408e-06	-0.253678	0.0721254	0.145155	0.000189305	4	no differential activity	Oncogene	TRUE
TCF4	MSH6	MSH6 p.T1085fs // MSH6 p.T783fs // MSH6 p.T955fs	26	7000	-0.701283	0.030226	-0.731509	0.854859	0.785587	-0.930857	0.855708	0.931162	4.22457e-06	-0.71136	0.00183535	0.441165	0.000144019	5	deactivated in tumors	TSG	TRUE
MYB	CTNNB1	CTNNB1 p.37	38	6783	0.561693	-0.0120939	0.573787	0.858449	0.765796	0.748747	0.6684	0.749268	4.25578e-06	0.573863	0.205353	0.682453	0.000588516	4	deactivated in tumors	Oncogene	TRUE
RUNX2	BRAF	BRAF interaction disrupting MAP2K1	469	6510	0.139875	-0.00236164	0.142237	0.632348	0.719615	0.199185	0.224935	0.197657	4.35634e-06	0.15794	2.53353e-05	0.201639	7.82055e-05	4	no differential activity	Oncogene	TRUE
ATF1	TP53	TP53 interface TP63	161	4377	0.237489	-0.0329488	0.270438	0.837735	0.74829	0.359804	0.32282	0.361408	4.37933e-06	0.276837	1.10485e-05	0.00132957	0.000405817	2	activated in tumors	TSG	TRUE
ESR1	TP53	TP53 3D hotspot 96-288-2mej	501	4377	-0.0656529	0.0908228	-0.156476	0.748278	0.707762	-0.219762	0.209114	0.221085	4.38461e-06	-0.154057	0.103071	2.41726e-07	0.000405817	3	deactivated in tumors	TSG	TRUE
ATF4	TP53	TP53 interaction disrupting BCL2L1	111	4377	0.230645	-0.124476	0.355122	0.865108	0.818415	0.433291	0.410494	0.433914	4.40124e-06	0.361221	0.371114	4.24757e-07	0.000405817	3	activated in tumors	TSG	TRUE
NRF1	TP53	TP53 p.273	215	4377	0.132096	-0.104357	0.236453	0.823314	0.739101	0.318138	0.287197	0.31992	4.41961e-06	0.237844	0.00531785	4.57834e-09	0.000405817	6	activated in tumors	TSG	TRUE
MYCN	ERCC2	ERCC2 missense	83	7073	0.395362	0.0101317	0.38523	0.731372	0.760168	0.506986	0.526723	0.50677	4.41982e-06	0.38525	0.075758	0.000952286	0.000331487	5	activated in tumors	Oncogene	TRUE
SMAD4	EP300	EP300 missense	213	6892	-0.232132	0.0206206	-0.252753	0.77987	0.750636	-0.33632	0.324096	0.336718	4.44358e-06	-0.240239	0.00025502	0.0372708	0.000618927	3	deactivated in tumors	TSG	TRUE
E2F6	ARID1A	ARID1A p.P1756fs // ARID1A p.P1922fs // ARID1A p.P2139fs	9	6602	1.22677	-9.40851e-05	1.22686	0.637518	0.803873	1.52653	1.92443	1.52619	4.45446e-06	1.23126	0.289	0.179739	0.00139349	2	activated in tumors	TSG	TRUE
JUND	KRAS	KRAS activitygain	114	6615	0.243574	-0.0107912	0.254365	0.563392	0.600997	0.42367	0.451488	0.423238	4.48161e-06	0.260671	0.00364609	0.242939	0.000274774	4	deactivated in tumors	Oncogene	TRUE
PBX1	ARID1A	ARID1A p.G1465fs // ARID1A p.G1631fs // ARID1A p.G1848fs	27	6602	-0.573605	0.0147477	-0.588353	0.634189	0.654223	-0.899422	0.927726	0.899316	4.49965e-06	-0.579199	0.0344275	0.0191859	0.00139349	4	deactivated in tumors	TSG	TRUE
SMAD4	CARD11	CARD11 truncating	35	6914	-0.58009	0.0158807	-0.595971	0.745091	0.751069	-0.793527	0.799862	0.793497	4.51981e-06	-0.583796	0.000293354	0.0357251	0.000316194	4	deactivated in tumors	Oncogene	TRUE
ATF4	PIK3CA	PIK3CA 3D hotspot 5-1062-3hhm	513	6014	-0.162481	0.0109602	-0.173442	0.881818	0.815221	-0.211349	0.196686	0.212754	4.54709e-06	-0.17439	0.0345828	0.327555	0.000322801	4	activated in tumors	Oncogene	TRUE
ESR1	BRAF	BRAF missense	624	6510	0.155524	0.00976576	0.145759	0.673099	0.749981	0.196022	0.216548	0.19435	4.5588e-06	0.143408	0.593527	0.0368746	8.11957e-05	3	deactivated in tumors	Oncogene	TRUE
NRF1	KRAS	KRAS p.G12D	117	6615	-0.344544	0.00295732	-0.347501	0.721674	0.782705	-0.444549	0.481521	0.443975	4.56889e-06	-0.334446	0.0170723	3.09305e-05	0.000274774	5	activated in tumors	Oncogene	TRUE
MYC	KRAS	KRAS missense	543	6615	0.137807	-0.00241666	0.140224	0.749273	0.732778	0.19103	0.187146	0.191359	4.60621e-06	0.150988	0.0151045	0.00314256	0.000274774	3	activated in tumors	Oncogene	TRUE
FOXM1	PTEN	PTEN p.R130G	27	6484	-0.529977	0.0109354	-0.540912	0.429366	0.580169	-0.933179	1.25979	0.932336	4.62055e-06	-0.513276	0.0156879	0.00266449	0.0020506	3	activated in tumors	TSG	TRUE
ESR1	HRAS	HRAS 3D hotspot 5-164-1bkd	53	7081	-0.444983	0.0248029	-0.469786	0.703172	0.744719	-0.631073	0.668096	0.630823	4.67382e-06	-0.470229	0.345312	0.0383923	0.000120613	2	deactivated in tumors	Oncogene	TRUE
BACH1	HRAS	HRAS 3D hotspot 1-166-1nvw	57	7081	-0.434549	0.0261146	-0.460663	0.807356	0.753897	-0.610691	0.570582	0.611043	4.75154e-06	-0.459285	0.0443673	0.781794	0.000120613	4	no differential activity	Oncogene	TRUE
PPARG	PIK3CA	PIK3CA interface PIK3R1	580	6014	0.145955	-0.00262904	0.148584	0.844873	0.728701	0.200888	0.175865	0.203902	4.79256e-06	0.148234	0.483197	0.745143	0.00033575	4	deactivated in tumors	Oncogene	TRUE
ATF1	TP53	TP53 interface TP53BP2	568	4377	0.11624	-0.0329488	0.149189	0.744459	0.74829	0.19949	0.200399	0.199374	4.81445e-06	0.152279	2.32034e-06	0.00278307	0.00043931	2	activated in tumors	TSG	TRUE
PAX6	HRAS	HRAS 3D hotspot 1-166-1nvx	33	7081	-0.558067	0.0108213	-0.568889	0.653378	0.721289	-0.78903	0.870689	0.788712	4.83475e-06	-0.57549	0.0154945	0.286844	0.000120613	4	deactivated in tumors	Oncogene	TRUE
ATF4	CTNNB1	CTNNB1 hotspot S33	155	6783	-0.313164	-0.00817931	-0.304985	0.814178	0.826921	-0.368945	0.374593	0.36882	4.90613e-06	-0.306891	0.030202	0.0097684	0.000659066	3	activated in tumors	Oncogene	TRUE
ATF4	CTNNB1	CTNNB1 interface FBXW11	155	6783	-0.313164	-0.00817931	-0.304985	0.814178	0.826921	-0.368945	0.374593	0.36882	4.90613e-06	-0.306891	0.030202	0.0097684	0.000659066	3	activated in tumors	Oncogene	TRUE
FOXI1	BRAF	BRAF interaction disrupting MAP2K1	469	6510	0.198249	0.0191465	0.179103	0.698801	0.764593	0.235551	0.2563	0.234246	4.90709e-06	0.167395	0.022145	0.142436	8.67162e-05	5	deactivated in tumors	Oncogene	TRUE
FOXM1	PIK3CA	PIK3CA 3D hotspot 5-1062-3hhm	513	6014	-0.108031	0.0243339	-0.132365	0.608918	0.567746	-0.231778	0.217377	0.233141	4.95048e-06	-0.120812	0.0188994	0.00285799	0.000342309	3	activated in tumors	Oncogene	TRUE
EZH2	CDH1	CDH1 truncating	122	6863	0.325319	-0.00926053	0.334579	0.829059	0.811392	0.412195	0.403565	0.412352	4.98701e-06	0.340632	0.0668581	0.668692	0.000267161	5	activated in tumors	TSG	TRUE
GATA3	TP53	TP53 interface TP53BP2	568	4377	-0.0720799	0.0722017	-0.144282	0.642312	0.709111	-0.205596	0.224629	0.203468	5.0035e-06	-0.14268	0.0092779	8.29797e-06	0.000452249	4	deactivated in tumors	TSG	TRUE
FOXM1	TP53	TP53 hotspot S183	130	4377	0.151629	-0.0786171	0.230247	0.570798	0.571004	0.403235	0.403376	0.403231	5.0182e-06	0.231014	0.00860661	1.80602e-11	0.000452249	2	activated in tumors	TSG	TRUE
PPARG	PIK3CA	PIK3CA 3D hotspot 8-1053-4l2y	547	6014	0.149149	-0.00262904	0.151778	0.85323	0.728701	0.205142	0.177886	0.208285	5.06601e-06	0.151895	0.518335	0.68911	0.000345579	4	deactivated in tumors	Oncogene	TRUE
CREB1	ARID1A	ARID1A missense	193	6602	0.281657	0.00633659	0.27532	0.866589	0.856001	0.321522	0.317705	0.321635	5.06724e-06	0.285834	0.0028748	0.376558	0.00139349	3	activated in tumors	TSG	TRUE
E2F1	MMP2	MMP2 missense	87	7064	0.323711	0.0137207	0.30999	0.589035	0.636	0.487824	0.526268	0.487406	5.0721e-06	0.312623	0.0332165	0.0003405	0.000760816	3	activated in tumors	Oncogene	TRUE
RUNX2	BRAF	BRAF activitygain	467	6510	0.1387	-0.00236164	0.141062	0.641882	0.719615	0.197377	0.219763	0.196024	5.10837e-06	0.157324	2.46897e-05	0.19609	8.95734e-05	4	no differential activity	Oncogene	TRUE
FOSL2	PIK3CA	PIK3CA p.542	145	6014	0.224484	-0.0298115	0.254296	0.745801	0.68435	0.370774	0.34097	0.371587	5.12758e-06	0.263244	0.123674	0.000340794	0.000345579	3	no differential activity	Oncogene	TRUE
EZH2	HRAS	HRAS 3D hotspot 1-166-1bkd	72	7081	-0.438688	0.00343151	-0.44212	0.79554	0.815861	-0.542038	0.555748	0.541905	5.13633e-06	-0.440815	0.102715	0.719108	0.000124117	5	activated in tumors	Oncogene	TRUE
RELA	NRAS	NRAS missense	221	6936	-0.211945	0.0121266	-0.224071	0.756342	0.70594	-0.316689	0.296257	0.317408	5.15516e-06	-0.220538	0.391119	0.00186833	0.00022053	4	no differential activity	Oncogene	TRUE
ELK1	HRAS	HRAS missense	78	7081	0.372826	0.000784534	0.372042	0.707851	0.715323	0.520162	0.525593	0.520104	5.17421e-06	0.371395	0.378802	0.0727412	0.000124117	3	activated in tumors	Oncogene	TRUE
E2F4	TP53	TP53 p.249	39	4377	0.431011	-0.0647709	0.495782	0.608986	0.668715	0.74194	0.814111	0.741395	5.19998e-06	0.488942	0.0465419	3.48778e-07	0.000465756	2	activated in tumors	TSG	TRUE
NR1I2	AXIN2	AXIN2 truncating	44	7041	0.523082	-0.00451571	0.527598	0.646865	0.766103	0.689279	0.815623	0.688678	5.23591e-06	0.528097	0.899387	0.928752	0.000392693	4	deactivated in tumors	TSG	TRUE
CEBPB	TP53	TP53 3D hotspot 97-291-4a63	494	4377	-0.115728	0.0526016	-0.16833	0.790697	0.779406	-0.215653	0.212887	0.215972	5.24597e-06	-0.168939	0.144614	0.756624	0.00046701	3	deactivated in tumors	TSG	TRUE
JUND	AJUBA	AJUBA truncating	32	7100	0.474603	0.0013551	0.473248	0.587405	0.60225	0.785883	0.805659	0.7858	5.28093e-06	0.486336	0.0249545	0.0532952	0.00079214	5	deactivated in tumors	TSG	TRUE
YY1	CARD11	CARD11 truncating	35	6914	0.611609	0.00280963	0.6088	0.588414	0.794452	0.767162	1.03465	0.766314	5.32119e-06	0.61267	0.902479	0.00346752	0.000316194	4	activated in tumors	Oncogene	TRUE
ATF4	CTNNB1	CTNNB1 GSK3A phosphorylation loss // CTNNB1 GSK3B phosphorylation loss	103	6783	-0.380512	-0.00817931	-0.372332	0.852762	0.826921	-0.450052	0.436619	0.450264	5.3445e-06	-0.373877	0.0346537	0.00877514	0.000687923	3	activated in tumors	Oncogene	TRUE
SMAD3	MSH6	MSH6 p.T1085fs // MSH6 p.T783fs // MSH6 p.T955fs	26	7000	-0.735465	0.0234688	-0.758934	0.782411	0.83226	-0.912084	0.969994	0.911895	5.35707e-06	-0.74428	0.000514294	0.000464092	0.000167408	4	deactivated in tumors	TSG	TRUE
FOXI1	BRAF	BRAF p.600	460	6510	0.200278	0.0191465	0.181132	0.697728	0.764593	0.238216	0.259602	0.2369	5.36401e-06	0.168388	0.0206712	0.131088	9.33324e-05	5	deactivated in tumors	Oncogene	TRUE
EZH2	HRAS	HRAS interface SOS1 // HRAS 3D hotspot 1-166-1nvu // HRAS 3D hotspot 1-166-1nvv	73	7081	-0.434847	0.00343151	-0.438279	0.790678	0.815861	-0.537362	0.554308	0.537198	5.38834e-06	-0.436819	0.103545	0.715655	0.000124849	5	activated in tumors	Oncogene	TRUE
NFKB1	HRAS	HRAS interface RAPGEF2 // HRAS 3D hotspot 5-162-3cf6	31	7081	-0.601073	0.0104074	-0.611481	0.707859	0.751772	-0.81358	0.863845	0.813386	5.40489e-06	-0.615572	0.608204	0.000897725	0.000124849	3	no differential activity	Oncogene	TRUE
ZEB1	CTNNB1	CTNNB1 GSK3A phosphorylation loss // CTNNB1 GSK3B phosphorylation loss	103	6783	0.277446	-0.00749056	0.284936	0.787721	0.625018	0.45391	0.361722	0.455885	5.41357e-06	0.283712	0.631959	0.14154	0.000687923	4	no differential activity	Oncogene	TRUE
ATF1	TP53	TP53 3D hotspot 97-291-4a63	494	4377	0.125856	-0.0329488	0.158805	0.741524	0.74829	0.212418	0.21416	0.212224	5.41405e-06	0.161145	4.17326e-06	0.00524472	0.000479052	2	activated in tumors	TSG	TRUE
STAT6	SMARCA4	SMARCA4 truncating	30	6895	-0.649579	0.0119967	-0.661576	0.604476	0.790573	-0.83756	1.09446	0.836831	5.48882e-06	-0.656467	0.0545762	2.29033e-05	0.000349475	4	deactivated in tumors	TSG	TRUE
E2F4	TP53	TP53 3D hotspot 95-290-1gzh	333	4377	0.109335	-0.0647709	0.174106	0.679275	0.668715	0.260067	0.256311	0.260359	5.50525e-06	0.172943	0.0184566	3.96527e-07	0.000484187	2	activated in tumors	TSG	TRUE
E2F6	CARD11	CARD11 p.R555fs	20	6914	0.81224	0.00550919	0.806731	0.570195	0.807074	1.00026	1.41483	0.999575	5.61487e-06	0.821636	0.276109	0.149897	0.000316194	4	activated in tumors	Oncogene	TRUE
GLI2	CARD11	CARD11 truncating	35	6914	-0.581925	0.0109521	-0.592877	0.560434	0.752439	-0.7888	1.05789	0.78794	5.62123e-06	-0.578671	0.000611488	0.906117	0.000316194	6	deactivated in tumors	Oncogene	TRUE
RUNX2	BRAF	BRAF hotspot S602	483	6510	0.135432	-0.00236164	0.137793	0.633874	0.719615	0.192979	0.217383	0.191482	5.67366e-06	0.153932	1.9688e-05	0.182263	9.79667e-05	4	no differential activity	Oncogene	TRUE
E2F4	TP53	TP53 Stability uniprot = D	218	4377	0.146062	-0.0647709	0.210833	0.684227	0.668715	0.314931	0.308133	0.31528	5.68815e-06	0.210427	0.0240822	1.61933e-07	0.000497277	2	activated in tumors	TSG	TRUE
NFKB1	NRAS	NRAS p.61	159	6936	-0.263573	0.0156148	-0.279188	0.837041	0.749661	-0.3714	0.333541	0.372419	5.70951e-06	-0.274017	0.646314	0.00197518	0.000233626	4	no differential activity	Oncogene	TRUE
ETS1	BRAF	BRAF hotspot T599	494	6510	-0.16013	0.0135106	-0.173641	0.742138	0.804543	-0.216968	0.233974	0.215826	5.71828e-06	-0.170735	0.997327	0.00577181	9.79891e-05	3	activated in tumors	Oncogene	TRUE
CREB1	APC	APC missense	351	6511	0.216501	0.00963211	0.206869	0.893654	0.859051	0.240308	0.231487	0.240811	5.73732e-06	0.214791	0.0221349	0.19883	0.0063976	3	activated in tumors	TSG	TRUE
GLI2	GATA3	GATA3 truncating	107	6972	-0.311974	0.0102819	-0.322256	0.79713	0.752517	-0.427847	0.404271	0.428238	5.82339e-06	-0.334138	0.000882563	0.414333	0.000313404	5	deactivated in tumors	TSG	TRUE
TP53	PIK3CA	PIK3CA 3D hotspot 8-1059-4l23	538	6014	0.143518	-0.0105714	0.154089	0.770213	0.735431	0.208696	0.200061	0.209522	5.88897e-06	0.151712	0.627292	0.329267	0.000391932	2	deactivated in tumors	Oncogene	TRUE
CREB1	CTNNB1	CTNNB1 missense	354	6783	0.211437	0.00393476	0.207503	0.897657	0.857206	0.241492	0.23116	0.242069	5.9003e-06	0.212625	0.0107349	0.159477	0.000730044	1	activated in tumors	Oncogene	TRUE
NRF1	TP53	TP53 p.R248Q	85	4377	0.270176	-0.104357	0.374533	0.711065	0.739101	0.507097	0.526721	0.506741	5.91553e-06	0.365386	0.00318139	4.31297e-09	0.000514078	6	activated in tumors	TSG	TRUE
ESR2	SMARCA4	SMARCA4 truncating	30	6895	-0.696032	0.0151531	-0.711185	1.21354	0.852121	-0.832815	0.586043	0.834606	5.991e-06	-0.707272	0.0185305	0.00627237	0.000349475	3	deactivated in tumors	TSG	TRUE
ATF1	TP53	TP53 interface PPP1R13L	587	4377	0.113319	-0.0329488	0.146268	0.760768	0.74829	0.195083	0.192264	0.19547	6.00829e-06	0.14896	3.16662e-06	0.00640029	0.000519049	2	activated in tumors	TSG	TRUE
ATF4	CDH1	CDH1 truncating	122	6863	-0.365441	-0.00883097	-0.35661	0.898488	0.826086	-0.431003	0.3969	0.431686	6.17235e-06	-0.343649	0.0292833	0.0388149	0.000308618	4	activated in tumors	TSG	TRUE
NRF1	PIK3CA	PIK3CA p.1047	246	6014	-0.239177	0.016687	-0.255864	0.884801	0.773603	-0.328766	0.289177	0.330743	6.18095e-06	-0.230975	0.00494466	0.00237903	0.000406286	5	activated in tumors	Oncogene	TRUE
TCF4	CTNNB1	CTNNB1 interface HLA-A	154	6783	0.302995	0.0176285	0.285367	0.716979	0.788383	0.362657	0.398013	0.361965	6.21394e-06	0.289826	0.000343743	0.568468	0.000749136	2	deactivated in tumors	Oncogene	TRUE
ZEB1	TP53	TP53 interface PPP1R13L	587	4377	-0.0990611	0.0244498	-0.123511	0.645989	0.619732	-0.198287	0.191197	0.199298	6.23834e-06	-0.123814	0.340753	0.0258328	0.000535753	3	no differential activity	TSG	TRUE
MEF2A	KEAP1	KEAP1 missense	188	6941	-0.282794	0.0055005	-0.288295	0.88662	0.832361	-0.345748	0.325162	0.346358	6.24628e-06	-0.279119	0.563458	0.000453231	0.000221907	5	no differential activity	Oncogene	TRUE
FOXM1	EGFR	EGFR inframe indel	35	6797	-0.44209	0.0129382	-0.455028	0.673985	0.576523	-0.788544	0.675132	0.789263	6.28808e-06	-0.441726	0.0340002	0.000150903	0.00348064	2	activated in tumors	Oncogene	TRUE
EZH2	EGFR	EGFR 3D hotspot 25-638-3njp	74	6797	0.416597	-0.00865231	0.42525	0.945236	0.809481	0.524324	0.449887	0.525336	6.29228e-06	0.428685	0.0537845	0.986725	0.00348064	4	activated in tumors	Oncogene	TRUE
E2F4	TP53	TP53 interface TP63	161	4377	0.179945	-0.0647709	0.244716	0.714301	0.668715	0.365043	0.342595	0.36595	6.30525e-06	0.242716	0.0403167	1.59426e-07	0.000538332	2	activated in tumors	TSG	TRUE
GLI2	MSH6	MSH6 p.T1085fs // MSH6 p.T783fs // MSH6 p.T955fs	26	7000	-0.678904	0.00938183	-0.688286	0.640186	0.754212	-0.913043	1.07514	0.912589	6.32633e-06	-0.669895	0.00491867	0.694026	0.00017273	6	deactivated in tumors	TSG	TRUE
MYC	EGFR	EGFR interaction decreasing LAT // EGFR interaction decreasing ACTN4 // EGFR interaction decreasing ABL1 // EGFR interaction decreasing TGFA // EGFR interaction decreasing RAF1 // EGFR interaction decreasing NR3C1 // EGFR interaction decreasing ITGB2 // EGFR interaction decreasing RET // EGFR interaction decreasing HSP90AB1 // EGFR interaction decreasing FGR // EGFR interaction decreasing PIM1 //…	22	6797	-0.705743	0.0146296	-0.720373	0.721436	0.729126	-0.988027	0.998526	0.987995	6.32849e-06	-0.703665	0.0689283	0.0147201	0.00348064	2	activated in tumors	Oncogene	TRUE
E2F7	ATM	ATM missense	359	6712	0.154011	0.00603777	0.147974	0.608255	0.625373	0.236941	0.243276	0.236616	6.34701e-06	0.153085	0.00779601	0.00333634	0.000884048	2	activated in tumors	TSG	TRUE
GATA2	KRAS	KRAS p.12	371	6615	0.188788	0.00241529	0.186372	0.79825	0.774487	0.240244	0.233476	0.24064	6.34804e-06	0.187791	0.259099	0.0324968	0.000359611	5	activated in tumors	Oncogene	TRUE
ATF4	PIK3CA	PIK3CA 3D hotspot 8-1059-4l23	538	6014	-0.156296	0.0109602	-0.167256	0.879297	0.815221	-0.203806	0.190216	0.205167	6.35648e-06	-0.167971	0.0400115	0.342301	0.000412729	4	activated in tumors	Oncogene	TRUE
PAX5	NRAS	NRAS p.61	159	6936	-0.270523	0.0250869	-0.29561	0.83535	0.825908	-0.35783	0.353876	0.357921	6.35816e-06	-0.299673	0.0493451	0.0698402	0.000249327	4	deactivated in tumors	Oncogene	TRUE
NRF1	TP53	TP53 interface TP53BP1 // TP53 3D hotspot 95-289-1kzy // TP53 3D hotspot 95-292-1gzh	353	4377	0.0848029	-0.104357	0.18916	0.809002	0.739101	0.254066	0.233819	0.255933	6.48318e-06	0.185434	0.00290845	3.841e-10	0.000550305	6	activated in tumors	TSG	TRUE
JUND	KRAS	KRAS interaction decreasing RASSF2 // KRAS interaction disrupting RASSF2 // KRAS p.G12V	112	6615	0.241768	-0.0107912	0.252559	0.557726	0.600997	0.420716	0.452837	0.420234	6.4921e-06	0.258438	0.00370507	0.240339	0.000359611	4	deactivated in tumors	Oncogene	TRUE
FOS	TP53	TP53 p.175	118	4377	0.22054	-0.0542338	0.274774	0.652377	0.659863	0.416533	0.421189	0.416411	6.64279e-06	0.277385	0.0270984	0.0413432	0.000560594	2	activated in tumors	TSG	TRUE
SOX2	TGFBR2	TGFBR2 p.E125fs // TGFBR2 p.E150fs	24	7035	-0.694136	-0.00290335	-0.691233	0.739774	0.73379	-0.941978	0.934383	0.942004	6.65602e-06	-0.677141	0.325865	0.0301517	0.000499201	6	deactivated in tumors	TSG	TRUE
FOXO3	PTEN	PTEN p.130	70	6484	-0.440871	0.0171081	-0.457979	0.833199	0.854958	-0.535817	0.549664	0.535675	6.73182e-06	-0.463931	0.425767	0.321952	0.0020506	2	deactivated in tumors	TSG	TRUE
MYC	MSH6	MSH6 p.T1085fs // MSH6 p.T783fs // MSH6 p.T955fs	26	7000	0.628385	0.00328124	0.625104	0.673391	0.734101	0.851763	0.928292	0.851522	6.83604e-06	0.649561	0.0215212	0.00361385	0.00017273	4	activated in tumors	TSG	TRUE
FOXM1	KEAP1	KEAP1 missense	188	6941	0.202751	0.00718937	0.195562	0.655587	0.574671	0.338964	0.2983	0.340302	6.88952e-06	0.19212	0.0146969	6.76177e-05	0.000232521	3	activated in tumors	Oncogene	TRUE
STAT2	MSH6	MSH6 truncating	61	7000	0.488636	-0.00117013	0.489806	1.19504	0.826219	0.590096	0.409866	0.592829	6.90922e-06	0.480586	0.314118	0.00621788	0.00017273	4	activated in tumors	TSG	TRUE
HIF1A	CREBBP	CREBBP missense	282	6820	0.19889	0.00832634	0.190563	0.764718	0.698698	0.271679	0.249195	0.272741	6.95324e-06	0.192356	0.617966	0.672792	0.00147999	3	activated in tumors	TSG	TRUE
FOXM1	CAD	CAD missense	162	6969	0.212156	0.00732411	0.204831	0.582104	0.576985	0.354932	0.351881	0.355003	6.95737e-06	0.206123	0.0112651	3.09159e-05	0.000521803	3	activated in tumors	Oncogene	TRUE
HIF1A	PTEN	PTEN p.L265fs	15	6484	0.805348	0.00308346	0.802265	0.71457	0.690557	1.16168	1.12272	1.16176	7.00353e-06	0.803324	0.435968	0.890133	0.0020506	2	activated in tumors	TSG	TRUE
ZEB1	PTEN	PTEN inframe indel	18	6484	0.647097	-0.0127853	0.659883	0.741134	0.620627	1.06266	0.890369	1.06325	7.05863e-06	0.65953	0.974765	0.951536	0.0020506	3	no differential activity	TSG	TRUE
BACH1	CDH1	CDH1 truncating	122	6863	-0.28461	0.0282641	-0.312874	0.760583	0.754863	-0.414423	0.41136	0.414477	7.11493e-06	-0.311589	0.0464062	0.836098	0.000333512	4	no differential activity	TSG	TRUE
NRF1	PTEN	PTEN truncating	325	6484	-0.215222	0.00446015	-0.219682	0.821724	0.782218	-0.280156	0.267343	0.280845	7.17115e-06	-0.200672	0.0089821	2.16801e-05	0.0020506	5	activated in tumors	TSG	TRUE
GATA2	AXIN2	AXIN2 p.G665fs	24	7041	-0.700565	0.0170497	-0.717615	0.807789	0.777778	-0.922529	0.888369	0.922647	7.29062e-06	-0.714434	0.566746	0.020631	0.000410097	6	activated in tumors	TSG	TRUE
FOXI1	SMARCA4	SMARCA4 truncating	30	6895	-0.592884	0.0339587	-0.626843	0.900847	0.760684	-0.823358	0.695837	0.824052	7.42254e-06	-0.62438	0.0111376	0.0901192	0.000389684	5	deactivated in tumors	TSG	TRUE
ZEB1	PIK3R1	PIK3R1 truncating	88	6916	0.294361	-0.0100937	0.304454	0.757533	0.624181	0.486339	0.401903	0.487766	7.44108e-06	0.301341	0.941567	0.131029	0.0128359	4	no differential activity	TSG	TRUE
NFKB1	HRAS	HRAS 3D hotspot 5-164-1nvw	29	7081	-0.613876	0.0104074	-0.624283	0.71988	0.751772	-0.830551	0.867204	0.830415	7.46534e-06	-0.626776	0.595794	0.000910907	0.000169308	3	no differential activity	Oncogene	TRUE
E2F4	KEAP1	KEAP1 interface KEAP1	36	6941	0.513788	0.0046639	0.509124	0.810847	0.68644	0.740953	0.627892	0.741688	7.46751e-06	0.514162	0.000588424	0.000498868	0.000240027	3	activated in tumors	Oncogene	TRUE
ETS1	BRAF	BRAF interaction disrupting MAP2K1	469	6510	-0.162946	0.0135106	-0.176456	0.740512	0.804543	-0.220458	0.238289	0.219325	7.66864e-06	-0.172566	0.925304	0.00675418	0.000130423	3	activated in tumors	Oncogene	TRUE
MYC	NR4A2	NR4A2 missense	68	7068	0.396424	0.00371063	0.392714	0.716564	0.733665	0.535393	0.548051	0.535277	7.75547e-06	0.399777	0.0336661	0.00282231	0.000465328	3	activated in tumors	TSG	TRUE
ELK1	HRAS	HRAS interface RASGRF1 // HRAS 3D hotspot 1-166-1xd2 // HRAS 3D hotspot 1-166-4nyi	70	7081	0.385635	0.000784534	0.384851	0.700361	0.715323	0.538117	0.549503	0.53801	7.75904e-06	0.384377	0.351857	0.0722036	0.000172827	3	activated in tumors	Oncogene	TRUE
PAX6	MSH6	MSH6 p.T1085fs // MSH6 p.T783fs // MSH6 p.T955fs	26	7000	-0.634085	0.0109104	-0.644996	0.859349	0.718986	-0.896407	0.750563	0.897091	7.80331e-06	-0.633152	0.023557	0.278245	0.00018289	6	deactivated in tumors	TSG	TRUE
GATA3	TP53	TP53 3D hotspot 97-287-1ycs	581	4377	-0.0674922	0.0722017	-0.139694	0.632096	0.709111	-0.19941	0.221001	0.196999	7.91716e-06	-0.137991	0.00968147	6.38681e-06	0.0006643	4	deactivated in tumors	TSG	TRUE
ELK1	HRAS	HRAS 3D hotspot 1-166-4nyj	69	7081	0.38834	0.000784534	0.387555	0.705123	0.715323	0.541864	0.549627	0.541791	7.92626e-06	0.386756	0.353216	0.072712	0.000173454	3	activated in tumors	Oncogene	TRUE
FOXM1	CARD11	CARD11 missense	213	6914	0.182516	0.00589075	0.176626	0.570511	0.577774	0.305814	0.309592	0.3057	7.98482e-06	0.179468	0.00904148	2.27304e-05	0.00039981	4	activated in tumors	Oncogene	TRUE
NRF1	RB1	RB1 truncating	155	6859	0.257109	-0.0155219	0.272631	0.804384	0.785065	0.347082	0.338931	0.347272	8.05977e-06	0.284522	0.00500374	1.518e-07	0.000949901	6	activated in tumors	TSG	TRUE
RELA	KEAP1	KEAP1 missense	188	6941	-0.224866	0.0132509	-0.238117	0.770445	0.705649	-0.336597	0.309064	0.337444	8.09936e-06	-0.233947	0.185845	0.00408863	0.000248503	3	no differential activity	Oncogene	TRUE
STAT1	HRAS	HRAS 3D hotspot 5-163-4lwz // HRAS p.61	27	7081	-0.666873	0.0166021	-0.683476	0.549649	0.799186	-0.85604	1.24348	0.855214	8.12692e-06	-0.687055	0.758925	0.000295979	0.000174779	2	deactivated in tumors	Oncogene	TRUE
ATF4	PIK3CA	PIK3CA 3D hotspot 2-1061-4jps	543	6014	-0.15315	0.0109602	-0.16411	0.875648	0.815221	-0.20004	0.187415	0.201307	8.24744e-06	-0.165187	0.0401111	0.375832	0.000516906	4	activated in tumors	Oncogene	TRUE
TP53	PIK3CA	PIK3CA 3D hotspot 2-1061-4jps	543	6014	0.140194	-0.0105714	0.150765	0.767187	0.735431	0.204258	0.196516	0.205002	8.24923e-06	0.148664	0.593765	0.355136	0.000516906	2	deactivated in tumors	Oncogene	TRUE
TP53	PIK3CA	PIK3CA 3D hotspot 8-1058-4l1b	547	6014	0.140162	-0.0105714	0.150734	0.773053	0.735431	0.20407	0.194985	0.204959	8.26553e-06	0.148191	0.646992	0.304844	0.000516906	2	deactivated in tumors	Oncogene	TRUE
STAT6	TP53	TP53 missense	1991	4377	-0.051227	0.0472106	-0.0984376	0.759209	0.796124	-0.125435	0.129658	0.123646	8.27838e-06	-0.0946566	0.0319221	9.07056e-05	0.00069064	3	deactivated in tumors	TSG	TRUE
SMAD3	CARD11	CARD11 truncating	35	6914	-0.61549	0.0234048	-0.638895	0.779489	0.831394	-0.76869	0.819633	0.768462	8.29235e-06	-0.627452	0.000182525	0.000188992	0.00039981	4	deactivated in tumors	Oncogene	TRUE
MYC	FBXW7	FBXW7 missense	271	6806	0.186615	-0.00361819	0.190234	0.788799	0.731002	0.259424	0.241169	0.260237	8.32451e-06	0.203061	0.012948	0.00237513	0.00459772	2	activated in tumors	TSG	TRUE
TP53	PIK3CA	PIK3CA 3D hotspot 8-1053-4l2y	547	6014	0.140174	-0.0105714	0.150746	0.773033	0.735431	0.204087	0.195006	0.204976	8.34926e-06	0.148103	0.644212	0.284524	0.000516906	2	deactivated in tumors	Oncogene	TRUE
NR3C1	KRAS	KRAS interaction decreasing RASSF2 // KRAS interaction disrupting RASSF2 // KRAS p.G12V	112	6615	0.32936	0.000611218	0.328748	0.921053	0.784239	0.417888	0.356927	0.419194	8.4107e-06	0.334656	0.0398954	0.527551	0.000449821	4	deactivated in tumors	Oncogene	TRUE
RUNX2	NRAS	NRAS p.61	159	6936	-0.255246	0.0129835	-0.26823	0.653557	0.7166	-0.375012	0.410416	0.374309	8.41729e-06	-0.255868	0.000268122	0.0981667	0.00031687	5	no differential activity	Oncogene	TRUE
TCF4	CTNNB1	CTNNB1 hotspot S33	155	6783	0.29784	0.0176285	0.280211	0.717525	0.788383	0.356104	0.390525	0.355425	8.55483e-06	0.284547	0.000349834	0.576105	0.00100556	2	deactivated in tumors	Oncogene	TRUE
TCF4	CTNNB1	CTNNB1 interface FBXW11	155	6783	0.29784	0.0176285	0.280211	0.717525	0.788383	0.356104	0.390525	0.355425	8.55483e-06	0.284547	0.000349834	0.576105	0.00100556	2	deactivated in tumors	Oncogene	TRUE
JUND	RASA1	RASA1 truncating	63	7007	0.334886	0.00107761	0.333809	0.707842	0.60121	0.55429	0.471587	0.555228	8.55505e-06	0.339483	0.0336021	0.0820702	0.0044914	3	deactivated in tumors	TSG	TRUE
FOSL2	HRAS	HRAS 3D hotspot 5-164-1bkd	53	7081	-0.416715	0.00300466	-0.41972	0.653277	0.684702	-0.613197	0.642484	0.612996	8.56399e-06	-0.420193	0.0386663	0.158379	0.000175941	3	no differential activity	Oncogene	TRUE
FOSL2	HRAS	HRAS 3D hotspot 1-166-4nym	54	7081	-0.412374	0.00300466	-0.415379	0.647871	0.684702	-0.606892	0.641145	0.606656	8.58832e-06	-0.416229	0.0385071	0.157169	0.000175941	3	no differential activity	Oncogene	TRUE
EZH2	HRAS	HRAS p.13	21	7081	-0.799399	0.00343151	-0.802831	0.749142	0.815861	-0.984247	1.07167	0.984029	8.62406e-06	-0.794068	0.139723	0.746	0.000175941	5	activated in tumors	Oncogene	TRUE
CREB1	ERCC2	ERCC2 missense	83	7073	0.428354	0.00990408	0.41845	0.651733	0.862139	0.486559	0.642058	0.485363	8.64435e-06	0.422688	0.0109833	0.147379	0.000432218	4	activated in tumors	Oncogene	TRUE
FOSL2	GATA3	GATA3 p.H434fs	7	6972	1.12354	-0.0083428	1.13188	0.409695	0.686251	1.64983	2.76275	1.64937	8.75091e-06	1.15419	0.0203101	0.0330806	0.000431712	3	no differential activity	TSG	TRUE
E2F1	TP53	TP53 interface TP63	161	4377	0.178583	-0.0480138	0.226597	0.657936	0.62954	0.359356	0.344406	0.359941	8.75225e-06	0.224818	0.0484221	5.22515e-07	0.000726025	2	activated in tumors	TSG	TRUE
ETS1	CDH1	CDH1 truncating	122	6863	-0.330465	0.0116474	-0.342112	0.934095	0.797572	-0.427568	0.36625	0.428942	8.76947e-06	-0.326912	0.486836	0.0333277	0.000384172	3	activated in tumors	TSG	TRUE
PAX6	HRAS	HRAS 3D hotspot 1-166-4nyj	69	7081	-0.378481	0.0108213	-0.389303	0.586374	0.721289	-0.540605	0.663915	0.539732	8.83783e-06	-0.387282	0.0179244	0.269012	0.000175941	4	deactivated in tumors	Oncogene	TRUE
PPARG	U2AF1	U2AF1 p.S34F	24	7116	-0.661816	0.0149044	-0.67672	0.726553	0.749951	-0.902441	0.931411	0.902352	8.86206e-06	-0.681958	0.321798	0.186785	0.00199396	5	deactivated in tumors	Oncogene	TRUE
FOXM1	TP53	TP53 p.G108fs	6	4377	0.923969	-0.0786171	1.00259	0.412069	0.571004	1.75631	2.43305	1.75583	8.86472e-06	1.03183	0.00866387	7.34162e-12	0.0007312	2	activated in tumors	TSG	TRUE
PAX6	HRAS	HRAS interface SOS1 // HRAS 3D hotspot 1-166-1nvu // HRAS 3D hotspot 1-166-1nvv	73	7081	-0.36809	0.0108213	-0.378911	0.62123	0.721289	-0.52601	0.609937	0.525326	8.8862e-06	-0.376648	0.0160412	0.293187	0.000175941	4	deactivated in tumors	Oncogene	TRUE
E2F4	ARID1A	ARID1A missense	193	6602	0.219449	0.00706863	0.212381	0.792223	0.680877	0.310374	0.268082	0.311922	8.8921e-06	0.222189	0.000179523	0.00117484	0.001834	2	activated in tumors	TSG	TRUE
STAT2	NRAS	NRAS missense	221	6936	-0.245632	0.0114687	-0.2571	0.865272	0.83045	-0.309185	0.297132	0.309592	8.95131e-06	-0.252532	0.16989	0.00706608	0.000324013	5	activated in tumors	Oncogene	TRUE
STAT1	HRAS	HRAS hotspot Y64	30	7081	-0.625341	0.0166021	-0.641943	0.553236	0.799186	-0.8041	1.16034	0.803245	9.04996e-06	-0.648484	0.752055	0.000279993	0.000176383	2	deactivated in tumors	Oncogene	TRUE
E2F7	MAP3K1	MAP3K1 truncating	87	6974	-0.30411	0.0173275	-0.321437	0.703606	0.624723	-0.513689	0.456843	0.514528	9.0891e-06	-0.301115	0.0350398	0.011019	0.000779065	3	activated in tumors	TSG	TRUE
EGR1	MET	MET interface BTK	33	6986	0.660172	0.0181076	0.642064	0.956458	0.843666	0.760546	0.671293	0.761041	9.1263e-06	0.653878	0.004154	0.158336	0.0155445	2	deactivated in tumors	Oncogene	TRUE
FOSL2	PIK3CA	PIK3CA interaction increasing PIK3R1 // PIK3CA p.E545K	219	6014	0.170107	-0.0298115	0.199918	0.661104	0.68435	0.292471	0.302401	0.292129	9.20614e-06	0.209401	0.0955536	0.000431965	0.000563404	3	no differential activity	Oncogene	TRUE
YY1	MSH6	MSH6 p.T1085fs // MSH6 p.T783fs // MSH6 p.T955fs	26	7000	0.690156	0.0060991	0.684057	0.810775	0.796451	0.858826	0.843708	0.858881	9.21464e-06	0.695108	0.930364	0.0016228	0.000203264	5	activated in tumors	TSG	TRUE
FOSL2	CDH1	CDH1 truncating	122	6863	0.261082	-0.00915475	0.270237	0.610643	0.687578	0.393748	0.442545	0.393027	9.22013e-06	0.279674	0.0418193	0.0661646	0.000384172	4	no differential activity	TSG	TRUE
FOXM1	PIK3CA	PIK3CA 3D hotspot 8-1059-4l23	538	6014	-0.102253	0.0243339	-0.126587	0.6133	0.567746	-0.221454	0.206402	0.222964	9.41768e-06	-0.114728	0.0147992	0.00138196	0.000569801	3	activated in tumors	Oncogene	TRUE
FOXM1	PIK3CA	PIK3CA 3D hotspot 8-1053-4l2y	547	6014	-0.100894	0.0243339	-0.125227	0.612456	0.567746	-0.219082	0.204468	0.22057	9.60806e-06	-0.113713	0.0158265	0.00136179	0.000574787	3	activated in tumors	Oncogene	TRUE
GLI2	CIC	CIC truncating	86	6893	-0.347742	0.013087	-0.360829	0.689484	0.753606	-0.479279	0.523331	0.478803	9.60815e-06	-0.361534	0.000530412	0.677454	0.00324275	6	deactivated in tumors	TSG	TRUE
ATF4	TP53	TP53 Stability uniprot = D	218	4377	0.130926	-0.124476	0.255403	0.842573	0.818415	0.311629	0.303122	0.31207	9.60835e-06	0.251372	0.295633	5.27244e-07	0.000788085	3	activated in tumors	TSG	TRUE
SOX2	FUBP1	FUBP1 truncating	49	7052	-0.455198	-0.00191266	-0.453285	0.559981	0.735378	-0.617275	0.809466	0.616397	9.7729e-06	-0.466185	0.141638	0.0205473	0.0021989	6	deactivated in tumors	TSG	TRUE
ETS1	NR4A2	NR4A2 missense	68	7068	0.428439	-0.000743623	0.429182	0.714807	0.803189	0.53487	0.600416	0.534347	9.82521e-06	0.432447	0.683162	0.002166	0.000535921	4	activated in tumors	TSG	TRUE
E2F1	KIT	KIT missense	228	6919	0.197557	0.0118102	0.185747	0.651006	0.634983	0.292286	0.285324	0.292523	9.83018e-06	0.18924	0.0258878	0.000417187	0.008722	2	activated in tumors	Oncogene	TRUE
MAX	APC	APC truncating	448	6511	0.169972	-0.00477344	0.174745	0.771936	0.767295	0.227653	0.226373	0.227742	9.83471e-06	0.167374	0.570575	0.000531979	0.0063976	3	activated in tumors	TSG	TRUE
STAT2	NRAS	NRAS p.61	159	6936	-0.291913	0.0114687	-0.303382	0.89822	0.83045	-0.364633	0.337759	0.365322	9.83742e-06	-0.295548	0.190392	0.010446	0.000342899	5	activated in tumors	Oncogene	TRUE
FOXM1	PIK3CA	PIK3CA 3D hotspot 8-1058-4l1b	547	6014	-0.100756	0.0243339	-0.12509	0.61244	0.567746	-0.218843	0.204249	0.220328	1.00261e-05	-0.113487	0.0157571	0.00134068	0.000593133	3	activated in tumors	Oncogene	TRUE
NR1I2	RB1	RB1 truncating	155	6859	0.268505	-0.00603167	0.274536	0.831858	0.763706	0.358745	0.330028	0.359479	1.027e-05	0.274619	0.949171	0.877586	0.00105909	4	deactivated in tumors	TSG	TRUE
PBX1	EP300	EP300 missense	213	6892	-0.196457	0.0150854	-0.211543	0.677332	0.660147	-0.320196	0.312317	0.320448	1.02837e-05	-0.203061	0.0225679	0.00991261	0.00125333	3	deactivated in tumors	TSG	TRUE
RELA	CTNNB1	CTNNB1 hotspot S33	155	6783	-0.239605	0.0122758	-0.251881	0.557269	0.711848	-0.355372	0.451992	0.353841	1.04138e-05	-0.253919	0.367015	0.00206099	0.00119422	2	no differential activity	Oncogene	TRUE
RELA	CTNNB1	CTNNB1 interface FBXW11	155	6783	-0.239605	0.0122758	-0.251881	0.557269	0.711848	-0.355372	0.451992	0.353841	1.04138e-05	-0.253919	0.367015	0.00206099	0.00119422	2	no differential activity	Oncogene	TRUE
ATF1	CDH1	CDH1 truncating	122	6863	-0.309466	0.0243327	-0.333798	0.784192	0.76322	-0.437144	0.425659	0.437355	1.04155e-05	-0.308897	4.36177e-06	0.0111518	0.000411137	4	activated in tumors	TSG	TRUE
FOXM1	PIK3CA	PIK3CA 3D hotspot 5-1062-3hiz	519	6014	-0.103234	0.0243339	-0.127568	0.613183	0.567746	-0.223223	0.208042	0.224692	1.05967e-05	-0.115954	0.0157655	0.00256508	0.000619997	3	activated in tumors	Oncogene	TRUE
TCF4	VHL	VHL missense	192	6853	0.258549	0.018224	0.240325	0.667924	0.789739	0.305491	0.359809	0.304309	1.06095e-05	0.254107	0.000246338	0.248523	0.0191798	3	deactivated in tumors	TSG	TRUE
PPARA	ERBB2	ERBB2 3D hotspot 713-997-3kex	9	6995	-1.16658	-0.00528824	-1.16129	1.33614	0.788851	-1.47056	0.869137	1.47213	1.06547e-05	-1.16069	0.124962	0.307346	0.0271119	4	deactivated in tumors	Oncogene	TRUE
NR1I2	NR4A2	NR4A2 missense	68	7068	0.408197	-0.00320196	0.411399	0.728379	0.766988	0.53663	0.564815	0.536383	1.0757e-05	0.411611	0.955663	0.805133	0.000537852	2	deactivated in tumors	TSG	TRUE
STAT1	HRAS	HRAS 3D hotspot 1-166-1nvx	33	7081	-0.589992	0.0166021	-0.606594	0.624902	0.799186	-0.75968	0.970704	0.759015	1.07663e-05	-0.613237	0.774709	0.000234924	0.000203694	2	deactivated in tumors	Oncogene	TRUE
TCF4	FBXW7	FBXW7 p.465	53	6806	-0.454039	0.0340195	-0.488059	0.874908	0.785811	-0.620526	0.55784	0.62109	1.07689e-05	-0.477936	0.00222801	0.223026	0.00459772	3	deactivated in tumors	TSG	TRUE
FOSL2	HRAS	HRAS 3D hotspot 1-166-1nvw	57	7081	-0.39656	0.00300466	-0.399564	0.635239	0.684702	-0.583879	0.628998	0.58356	1.07778e-05	-0.400678	0.0392235	0.152623	0.000203694	3	no differential activity	Oncogene	TRUE
RELA	NRAS	NRAS p.61	159	6936	-0.243755	0.0121266	-0.255882	0.773813	0.70594	-0.361658	0.330676	0.362469	1.07887e-05	-0.250161	0.425431	0.00266452	0.00036081	4	no differential activity	Oncogene	TRUE
NR1I2	CTNNB1	CTNNB1 interface HLA-A	154	6783	0.265986	-0.00791801	0.273904	0.704329	0.765932	0.358219	0.388886	0.357608	1.09706e-05	0.274286	0.771819	0.952687	0.00121988	2	deactivated in tumors	Oncogene	TRUE
ZEB1	TP53	TP53 3D hotspot 97-291-4a63	494	4377	-0.104845	0.0244498	-0.129294	0.644176	0.619732	-0.207785	0.200713	0.20863	1.09912e-05	-0.129945	0.256277	0.0266731	0.000896474	3	no differential activity	TSG	TRUE
GLI2	CARD11	CARD11 p.R555fs	20	6914	-0.753957	0.0109521	-0.764909	0.58446	0.752439	-1.01713	1.30874	1.01657	1.10383e-05	-0.741242	0.000764376	0.843596	0.000472725	6	deactivated in tumors	Oncogene	TRUE
PAX5	NRAS	NRAS interface RASA1	204	6936	-0.231317	0.0250869	-0.256404	0.781812	0.825908	-0.310911	0.327961	0.310451	1.1118e-05	-0.257732	0.0640062	0.0682185	0.00036081	4	deactivated in tumors	Oncogene	TRUE
NR1I2	CTNNB1	CTNNB1 hotspot S33	155	6783	0.264877	-0.00791801	0.272795	0.702174	0.765932	0.356793	0.388501	0.356161	1.11565e-05	0.273173	0.772567	0.950738	0.00121988	2	deactivated in tumors	Oncogene	TRUE
NR1I2	CTNNB1	CTNNB1 interface FBXW11	155	6783	0.264877	-0.00791801	0.272795	0.702174	0.765932	0.356793	0.388501	0.356161	1.11565e-05	0.273173	0.772567	0.950738	0.00121988	2	deactivated in tumors	Oncogene	TRUE
MYC	CARD11	CARD11 p.R555fs	20	6914	0.69453	0.00201352	0.692516	0.475651	0.731408	0.947575	1.45593	0.946826	1.12053e-05	0.719761	0.0234154	0.00534186	0.000472725	3	activated in tumors	Oncogene	TRUE
E2F6	FGFR3	FGFR3 p.S249C // FGFR3 p.249	19	7059	0.827062	0.00786919	0.819193	1.03944	0.804574	1.01731	0.788113	1.01817	1.12599e-05	0.813644	0.370943	0.20775	0.000844494	4	activated in tumors	Oncogene	TRUE
NFKB1	STK11	STK11 p.G279fs	6	7032	-1.35113	0.0125029	-1.36363	0.571777	0.75073	-1.81668	2.3849	1.81641	1.12796e-05	-1.34684	0.529444	0.00440477	0.00129417	3	no differential activity	TSG	TRUE
NR1I2	CTNNB1	CTNNB1 missense	354	6783	0.175377	-0.00791801	0.183295	0.767659	0.765932	0.239283	0.238771	0.239309	1.15554e-05	0.18362	0.872042	0.962647	0.00123478	2	deactivated in tumors	Oncogene	TRUE
E2F1	B2M	B2M truncating	55	7073	0.387037	0.01559	0.371447	0.541523	0.636181	0.584481	0.685931	0.58387	1.16453e-05	0.377129	0.028564	0.00039852	0.00557643	3	activated in tumors	TSG	TRUE
ATF4	CTNNB1	CTNNB1 CSNK2A1 phosphorylation loss	113	6783	-0.349321	-0.00817931	-0.341141	0.787939	0.826921	-0.412853	0.432954	0.412544	1.19436e-05	-0.343255	0.0392907	0.0128186	0.00124791	3	activated in tumors	Oncogene	TRUE
ETS1	SMARCA4	SMARCA4 truncating	30	6895	0.642197	-0.00417441	0.646371	0.671139	0.804063	0.804392	0.963096	0.803881	1.2271e-05	0.643086	0.627247	0.00410565	0.00058566	5	activated in tumors	TSG	TRUE
E2F7	CAD	CAD missense	162	6969	0.224243	0.00893766	0.215305	0.606606	0.625363	0.344519	0.354935	0.344289	1.23241e-05	0.21722	0.0159435	0.00296673	0.000693233	4	activated in tumors	Oncogene	TRUE
MEF2A	CTNNB1	CTNNB1 hotspot S37	185	6783	-0.26836	0.00359725	-0.271958	0.676073	0.842371	-0.324376	0.402261	0.322848	1.2449e-05	-0.273055	0.715628	0.000247279	0.00125262	5	no differential activity	Oncogene	TRUE
SP1	HRAS	HRAS interface RAPGEF2 // HRAS 3D hotspot 5-162-3cf6	31	7081	-0.565104	0.0152871	-0.580391	0.742302	0.738274	-0.786127	0.781879	0.786145	1.25534e-05	-0.581035	0.706337	0.308146	0.000230405	3	no differential activity	Oncogene	TRUE
ATF3	PIK3CA	PIK3CA missense	1097	6014	-0.0936439	0.0212134	-0.114857	0.798062	0.786821	-0.145654	0.14392	0.145976	1.25777e-05	-0.114661	0.886825	0.894409	0.000727904	3	no differential activity	Oncogene	TRUE
PPARG	CTNNB1	CTNNB1 hotspot S29	117	6783	0.31145	0.00505422	0.306395	0.693147	0.751366	0.408296	0.442035	0.407784	1.25926e-05	0.305866	0.429053	0.24745	0.00125262	2	deactivated in tumors	Oncogene	TRUE
STAT1	HRAS	HRAS 3D hotspot 5-164-1nvw	29	7081	-0.626831	0.0166021	-0.643433	0.586729	0.799186	-0.805842	1.09664	0.80511	1.26402e-05	-0.648783	0.775612	0.000279534	0.000230405	2	deactivated in tumors	Oncogene	TRUE
SPI1	TP53	TP53 interaction disrupting NRDC	115	4377	0.305558	0.00673529	0.298822	0.822066	0.76482	0.389941	0.363502	0.390709	1.26697e-05	0.316838	0.000912679	0.332068	0.00102763	3	activated in tumors	TSG	TRUE
ESR1	CASP8	CASP8 missense	92	7006	-0.315434	0.0261881	-0.341622	0.807936	0.744369	-0.458419	0.422833	0.458942	1.27243e-05	-0.341754	0.451358	0.0253062	0.00163598	2	deactivated in tumors	TSG	TRUE
IRF1	HSPA8	HSPA8 interface BAG3	5	7068	1.65527	0.0116832	1.64358	0.827718	0.839165	1.95861	1.98568	1.95859	1.27622e-05	1.63891	0.447098	0.00792153	0.00518378	4	no differential activity	Oncogene	TRUE
GLI2	FBXW7	FBXW7 p.465	53	6806	-0.452421	0.00913946	-0.46156	0.702602	0.748997	-0.616519	0.656929	0.616238	1.27714e-05	-0.451129	0.00290691	0.432961	0.00459772	5	deactivated in tumors	TSG	TRUE
LEF1	TP53	TP53 p.P190L	7	4377	-1.2465	0.0211132	-1.26761	0.622655	0.768714	-1.64939	2.03582	1.649	1.28284e-05	-1.26943	0.846857	0.0258783	0.00103476	3	deactivated in tumors	TSG	TRUE
PAX6	HRAS	HRAS 3D hotspot 1-166-1bkd	72	7081	-0.363729	0.0108213	-0.37455	0.624463	0.721289	-0.519926	0.599795	0.519279	1.2844e-05	-0.372422	0.0162734	0.290748	0.000230405	4	deactivated in tumors	Oncogene	TRUE
MYC	CTNNB1	CTNNB1 hotspot S29	117	6783	0.29342	-0.00276975	0.29619	0.629852	0.733945	0.404456	0.470253	0.403559	1.28738e-05	0.297957	0.0267908	0.0101753	0.00125262	2	activated in tumors	Oncogene	TRUE
GATA3	TP53	TP53 interface PPP1R13L	587	4377	-0.0639096	0.0722017	-0.136111	0.63304	0.709111	-0.19429	0.215012	0.191946	1.29061e-05	-0.134101	0.0111312	2.65601e-06	0.0010353	4	deactivated in tumors	TSG	TRUE
PAX6	HRAS	HRAS 3D hotspot 1-166-1wq1	69	7081	-0.371269	0.0108213	-0.382091	0.582412	0.721289	-0.530612	0.656049	0.529733	1.30421e-05	-0.379901	0.0185204	0.258924	0.000230405	4	deactivated in tumors	Oncogene	TRUE
RUNX2	KEAP1	KEAP1 missense	188	6941	-0.212113	0.0122799	-0.224393	0.688458	0.71619	-0.313628	0.325936	0.313315	1.30552e-05	-0.230995	6.69504e-05	0.149966	0.000383143	4	no differential activity	Oncogene	TRUE
NR1I2	CTNNB1	CTNNB1 CSNK2A1 phosphorylation loss	113	6783	0.308336	-0.00791801	0.316254	0.681676	0.765932	0.4136	0.463936	0.412901	1.30593e-05	0.31647	0.853942	0.957054	0.00125262	2	deactivated in tumors	Oncogene	TRUE
ATF3	PTEN	PTEN missense	407	6484	-0.159701	0.0170833	-0.176784	0.759567	0.792798	-0.223529	0.232743	0.222987	1.30709e-05	-0.17694	0.836521	0.762196	0.00342615	2	no differential activity	TSG	TRUE
PAX6	HRAS	HRAS 3D hotspot 1-166-1nvw	57	7081	-0.408349	0.0108213	-0.41917	0.614964	0.721289	-0.581764	0.681617	0.581141	1.31147e-05	-0.417747	0.0167802	0.292872	0.000230405	4	deactivated in tumors	Oncogene	TRUE
RUNX1	BRAF	BRAF hotspot S602	483	6510	0.133905	-0.0235011	0.157406	0.872186	0.795313	0.196549	0.180473	0.197917	1.32566e-05	0.165892	0.066612	0.985994	0.000222738	3	deactivated in tumors	Oncogene	TRUE
HNF1A	BRAF	BRAF missense	624	6510	-0.0890602	0.00732942	-0.0963896	0.49284	0.506112	-0.190883	0.19558	0.190451	1.32936e-05	-0.0925139	0.0391394	0.302416	0.000222738	4	deactivated in tumors	Oncogene	TRUE
FOS	TP53	TP53 interaction increasing VRK1 // TP53 p.R175H	108	4377	0.222551	-0.0542338	0.276785	0.66725	0.659863	0.419345	0.414814	0.419458	1.33022e-05	0.280146	0.0294878	0.0377066	0.00106125	2	activated in tumors	TSG	TRUE
TCF4	CTNNB1	CTNNB1 hotspot S37	185	6783	0.267695	0.0176285	0.250067	0.719714	0.788383	0.31789	0.347453	0.317189	1.33208e-05	0.255337	0.000389897	0.574719	0.00125262	2	deactivated in tumors	Oncogene	TRUE
E2F6	ARID1A	ARID1A p.G1465fs // ARID1A p.G1631fs // ARID1A p.G1848fs	27	6602	0.66871	-9.40851e-05	0.668804	0.734703	0.803873	0.832247	0.910305	0.831978	1.34301e-05	0.675607	0.342905	0.181095	0.00221596	2	activated in tumors	TSG	TRUE
MYC	APC	APC truncating	448	6511	0.144345	-0.00299627	0.147341	0.642837	0.736282	0.201661	0.229204	0.200115	1.3483e-05	0.156806	0.00770915	0.00302705	0.0063976	2	activated in tumors	TSG	TRUE
FLI1	GATA3	GATA3 truncating	107	6972	-0.303813	0.00426331	-0.308077	0.819572	0.76051	-0.404604	0.3759	0.405092	1.36138e-05	-0.324286	0.139946	0.0546372	0.000619951	5	deactivated in tumors	TSG	TRUE
SMAD4	CARD11	CARD11 p.R555fs	20	6914	-0.73362	0.0158807	-0.7495	0.811623	0.751069	-0.997682	0.923458	0.997911	1.36169e-05	-0.732372	0.000321867	0.0296487	0.000540673	4	deactivated in tumors	Oncogene	TRUE
FOS	PIK3CA	PIK3CA p.1047	246	6014	-0.15707	0.031364	-0.188434	0.771133	0.666294	-0.280948	0.24436	0.282809	1.37254e-05	-0.191578	0.00482876	0.253089	0.000785785	3	activated in tumors	Oncogene	TRUE
MEF2A	FGFR3	FGFR3 interface FGF1 // FGFR3 3D hotspot 150-362-1ry7	23	7059	-0.783712	-0.00220335	-0.781508	1.07	0.833246	-0.936964	0.730383	0.937908	1.37753e-05	-0.75803	0.743341	0.000365294	0.000929834	6	no differential activity	Oncogene	TRUE
ELK1	HRAS	HRAS 3D hotspot 1-166-1bkd	72	7081	0.37033	0.000784534	0.369546	0.720744	0.715323	0.516575	0.512728	0.516614	1.38055e-05	0.368573	0.375016	0.077911	0.000239173	3	activated in tumors	Oncogene	TRUE
E2F7	TP53	TP53 p.R249S	23	4377	0.539792	-0.0438711	0.583663	0.688626	0.63579	0.917615	0.847577	0.918012	1.38348e-05	0.577381	0.00559877	0.000108729	0.00109774	3	activated in tumors	TSG	TRUE
TP53	PIK3CA	PIK3CA interface PIK3R3	573	6014	0.133073	-0.0105714	0.143645	0.770043	0.735431	0.194508	0.186541	0.19532	1.39088e-05	0.141417	0.651104	0.339468	0.000787813	2	deactivated in tumors	Oncogene	TRUE
E2F1	TP53	TP53 3D hotspot 97-291-4a63	494	4377	0.0800215	-0.0480138	0.128035	0.600469	0.62954	0.204315	0.213225	0.203379	1.39389e-05	0.129102	0.116229	6.34218e-06	0.00110002	2	activated in tumors	TSG	TRUE
FOS	MLLT4	MLLT4 missense	126	7002	0.278291	0.0161504	0.26214	0.730022	0.674624	0.387991	0.359085	0.388572	1.40454e-05	0.263911	0.0256	0.858195	0.000735656	3	activated in tumors	TSG	TRUE
YY1	BRAF	BRAF activitygain	467	6510	-0.150594	0.0181624	-0.168757	0.747737	0.797297	-0.212518	0.22569	0.211661	1.41574e-05	-0.166531	0.72962	0.00454197	0.000235468	3	activated in tumors	Oncogene	TRUE
E2F1	SMARCA4	SMARCA4 missense	230	6895	0.197697	0.0100879	0.187609	0.595525	0.63658	0.295307	0.315032	0.294714	1.42347e-05	0.184938	0.0340226	0.000632418	0.000622769	2	activated in tumors	TSG	TRUE
STAT2	JAK1	JAK1 truncating	43	7025	-0.544886	0.00460354	-0.54949	1.06622	0.824866	-0.664832	0.515364	0.666156	1.42774e-05	-0.549007	0.145834	0.00600225	0.00434556	3	activated in tumors	Oncogene	TRUE
STAT3	NRAS	NRAS interface RASA1	204	6936	-0.208024	0.0157011	-0.223725	0.73391	0.721465	-0.309945	0.30484	0.310099	1.42948e-05	-0.222778	0.367449	0.0252288	0.000442144	4	deactivated in tumors	Oncogene	TRUE
E2F6	MSH6	MSH6 p.T1085fs // MSH6 p.T783fs // MSH6 p.T955fs	26	7000	0.678987	0.00646292	0.672524	0.783157	0.805501	0.834995	0.858735	0.834914	1.43086e-05	0.687978	0.171775	0.114748	0.000298095	3	activated in tumors	TSG	TRUE
SPI1	HRAS	HRAS hotspot Y64	30	7081	-0.61051	0.00592544	-0.616436	0.626082	0.771262	-0.799812	0.984592	0.799256	1.43333e-05	-0.612121	0.0228103	0.0412967	0.000241519	4	activated in tumors	Oncogene	TRUE
RUNX1	BRAF	BRAF missense	624	6510	0.118251	-0.0235011	0.141753	0.873334	0.795313	0.176654	0.162312	0.178235	1.4346e-05	0.146473	0.0872738	0.913204	0.000236862	3	deactivated in tumors	Oncogene	TRUE
PPARG	CTNNB1	CTNNB1 GSK3A phosphorylation loss // CTNNB1 GSK3B phosphorylation loss	103	6783	0.33045	0.00505422	0.325396	0.723292	0.751366	0.433308	0.449882	0.433072	1.43537e-05	0.323747	0.437899	0.280097	0.00131613	2	deactivated in tumors	Oncogene	TRUE
NFKB1	HRAS	HRAS interface AFDN	28	7081	-0.605907	0.0104074	-0.616314	0.731787	0.751772	-0.819897	0.842205	0.819815	1.43626e-05	-0.617684	0.59181	0.000900263	0.000241519	3	no differential activity	Oncogene	TRUE
ELK1	HRAS	HRAS interface SOS1 // HRAS 3D hotspot 1-166-1nvu // HRAS 3D hotspot 1-166-1nvv	73	7081	0.366549	0.000784534	0.365764	0.71645	0.715323	0.51132	0.510523	0.511328	1.45218e-05	0.365105	0.372755	0.0771089	0.000241519	3	activated in tumors	Oncogene	TRUE
RXRA	CTNNB1	CTNNB1 hotspot S29	117	6783	-0.263301	0.00197157	-0.265273	0.51947	0.658403	-0.404189	0.510661	0.402904	1.45561e-05	-0.265564	0.531782	0.275243	0.00131613	1	deactivated in tumors	Oncogene	TRUE
STAT2	NRAS	NRAS p.Q61R	82	6936	-0.397862	0.0114687	-0.40933	0.961255	0.83045	-0.491938	0.425829	0.492902	1.45639e-05	-0.401422	0.213758	0.0114731	0.000442144	5	activated in tumors	Oncogene	TRUE
ESR2	TP53	TP53 p.A159P	9	4377	-1.17454	0.025101	-1.19964	1.0897	0.821978	-1.45845	1.10089	1.45946	1.45986e-05	-1.18896	0.00802288	0.0017756	0.00114589	4	deactivated in tumors	TSG	TRUE
VDR	STK11	STK11 p.G279fs	6	7032	-1.29028	0.00459403	-1.29488	1.15986	0.72247	-1.79129	1.11641	1.79229	1.46647e-05	-1.28037	0.535305	0.0300167	0.00138151	4	deactivated in tumors	TSG	TRUE
E2F1	TP53	TP53 interface TP53BP1 // TP53 3D hotspot 95-289-1kzy // TP53 3D hotspot 95-292-1gzh	353	4377	0.105492	-0.0480138	0.153506	0.60222	0.62954	0.244612	0.254899	0.243838	1.46776e-05	0.150454	0.0409823	5.6354e-07	0.00114593	2	activated in tumors	TSG	TRUE
BACH1	HRAS	HRAS 3D hotspot 5-163-4lwz // HRAS p.61	27	7081	-0.597112	0.0261146	-0.623226	0.82639	0.753897	-0.826368	0.754155	0.826673	1.48142e-05	-0.630394	0.0389531	0.764378	0.000243139	4	no differential activity	Oncogene	TRUE
RXRA	CTNNB1	CTNNB1 missense	354	6783	-0.152684	0.00197157	-0.154656	0.616807	0.658403	-0.23561	0.250736	0.234896	1.48608e-05	-0.155343	0.399867	0.204295	0.00131833	1	deactivated in tumors	Oncogene	TRUE
JUN	KRAS	KRAS missense	543	6615	0.135083	-0.00119291	0.136276	0.737686	0.714666	0.190214	0.184734	0.190685	1.487e-05	0.139334	0.12734	0.0261857	0.000768766	3	deactivated in tumors	Oncogene	TRUE
LEF1	PIK3CA	PIK3CA 3D hotspot 8-1053-4l2y	547	6014	0.15851	0.00113585	0.157374	0.825011	0.777714	0.201307	0.190754	0.202355	1.49057e-05	0.152263	0.287174	0.0375031	0.000835393	4	deactivated in tumors	Oncogene	TRUE
E2F7	MEN1	MEN1 truncating	36	7065	0.456434	0.0116619	0.444772	0.642515	0.625754	0.710683	0.692237	0.710778	1.53139e-05	0.45217	0.0198982	0.00164899	0.00344564	3	activated in tumors	TSG	TRUE
FOXO3	TP53	TP53 truncating	800	4377	-0.0819794	0.0607737	-0.142753	0.932985	0.832486	-0.168186	0.153007	0.171478	1.53341e-05	-0.141459	0.747697	0.0985857	0.00119082	2	deactivated in tumors	TSG	TRUE
E2F4	FBXW7	FBXW7 missense	271	6806	0.173129	0.00500216	0.168127	0.730696	0.688339	0.243661	0.230091	0.24425	1.54929e-05	0.1851	0.000295355	5.83619e-05	0.00464787	3	activated in tumors	TSG	TRUE
FOS	TP53	TP53 interaction ZNF385A loss	109	4377	0.219227	-0.0542338	0.273461	0.665059	0.659863	0.414342	0.411183	0.414421	1.55213e-05	0.276687	0.0292367	0.0385487	0.00119898	2	activated in tumors	TSG	TRUE
LEF1	PIK3CA	PIK3CA interface PIK3R3	573	6014	0.155041	0.00113585	0.153905	0.825343	0.777714	0.196818	0.186474	0.197894	1.55316e-05	0.14885	0.29385	0.0361576	0.000861402	4	deactivated in tumors	Oncogene	TRUE
IRF1	HRAS	HRAS p.12	16	7081	0.908374	0.012042	0.896332	1.17343	0.837509	1.06915	0.763857	1.07023	1.55909e-05	0.906963	0.605948	0.00788681	0.000252564	4	no differential activity	Oncogene	TRUE
GATA2	STK11	STK11 p.G279fs	6	7032	-1.37379	0.0157332	-1.38953	0.479766	0.778195	-1.78597	2.89626	1.78558	1.56347e-05	-1.37353	0.481918	0.027727	0.00138151	5	activated in tumors	TSG	TRUE
FOXM1	TP53	TP53 hotspot T284	209	4377	0.0943338	-0.0786171	0.172951	0.503665	0.571004	0.304426	0.343385	0.302889	1.56468e-05	0.173312	0.0214885	1.42704e-10	0.00120231	2	activated in tumors	TSG	TRUE
NR3C1	KEAP1	KEAP1 truncating	35	6941	0.578227	0.00896064	0.569267	1.15258	0.787831	0.720575	0.493907	0.722575	1.56514e-05	0.578882	0.043545	0.465034	0.000440195	4	deactivated in tumors	Oncogene	TRUE
E2F6	MET	MET missense	157	6986	0.286648	0.00531309	0.281335	0.82491	0.80592	0.348904	0.341049	0.349086	1.58235e-05	0.281206	0.447031	0.14066	0.0155445	3	activated in tumors	Oncogene	TRUE
HNF1A	NFE2L2	NFE2L2 interface KEAP1 // NFE2L2 3D hotspot 69-84-4ifl	54	6974	0.294689	-0.00731328	0.302002	0.384782	0.504711	0.599314	0.784866	0.598367	1.58305e-05	0.297516	0.0832111	0.440278	0.00701647	2	deactivated in tumors	Oncogene	TRUE
HNF1A	NFE2L2	NFE2L2 3D hotspot 69-84-2flu	54	6974	0.294689	-0.00731328	0.302002	0.384782	0.504711	0.599314	0.784866	0.598367	1.58305e-05	0.297516	0.0832111	0.440278	0.00701647	2	deactivated in tumors	Oncogene	TRUE
FOXI1	BRAF	BRAF activitygain	467	6510	0.190238	0.0191465	0.171091	0.704173	0.764593	0.224911	0.242967	0.223768	1.59903e-05	0.158545	0.0186225	0.133556	0.000262098	5	deactivated in tumors	Oncogene	TRUE
STAT2	NRAS	NRAS interface RASA1	204	6936	-0.249735	0.0114687	-0.261204	0.867631	0.83045	-0.314124	0.301054	0.314533	1.61984e-05	-0.254954	0.161981	0.00728315	0.0004764	5	activated in tumors	Oncogene	TRUE
ESR1	TP53	TP53 interface BCL2L1	418	4377	-0.0721764	0.0908228	-0.162999	0.756316	0.707762	-0.228894	0.215517	0.230302	1.6201e-05	-0.157022	0.0491173	1.78053e-07	0.00123838	3	deactivated in tumors	TSG	TRUE
E2F6	CTCF	CTCF p.K202fs	9	7006	1.1573	0.00833251	1.14896	0.611178	0.807773	1.42273	1.87992	1.42238	1.62375e-05	1.16268	0.302337	0.112779	0.00246712	4	activated in tumors	TSG	TRUE
E2F1	TRIO	TRIO truncating	45	6905	0.403313	0.0109003	0.392412	0.668248	0.63455	0.618197	0.587226	0.61841	1.62525e-05	0.409521	0.0157542	0.000156997	0.00203156	3	activated in tumors	Oncogene	TRUE
MYC	KRAS	KRAS p.13	74	6615	0.357032	-0.00241666	0.359449	0.721491	0.732778	0.49061	0.498202	0.490528	1.63497e-05	0.369261	0.00711763	0.0126122	0.000818	3	activated in tumors	Oncogene	TRUE
HIF1A	CTCF	CTCF truncating	67	7006	0.384044	0.0110616	0.372982	0.852757	0.701274	0.53068	0.437384	0.531864	1.64475e-05	0.372745	0.815849	0.877446	0.00246712	5	activated in tumors	TSG	TRUE
LEF1	PIK3CA	PIK3CA 3D hotspot 8-1058-4l1b	547	6014	0.157747	0.00113585	0.156611	0.825841	0.777714	0.200313	0.189639	0.201374	1.65166e-05	0.151496	0.290703	0.0399545	0.000906591	4	deactivated in tumors	Oncogene	TRUE
RELA	CTNNB1	CTNNB1 interface HLA-A	154	6783	-0.234387	0.0122758	-0.246662	0.555274	0.711848	-0.348016	0.444217	0.34651	1.69256e-05	-0.248562	0.369774	0.00197567	0.00146027	2	no differential activity	Oncogene	TRUE
RARA	MAP3K1	MAP3K1 truncating	87	6974	-0.360412	-0.0023486	-0.358063	1.0207	0.777273	-0.458647	0.350803	0.460666	1.69619e-05	-0.36436	0.488105	0.321144	0.00127214	3	deactivated in tumors	TSG	TRUE
PAX6	HRAS	HRAS interface NF1	70	7081	-0.36342	0.0108213	-0.374241	0.581894	0.721289	-0.519727	0.643144	0.518851	1.71706e-05	-0.371945	0.0189257	0.254783	0.000274588	4	deactivated in tumors	Oncogene	TRUE
E2F1	CARD11	CARD11 truncating	35	6914	0.458418	0.00944322	0.448975	0.503227	0.634141	0.708647	0.89219	0.708004	1.71779e-05	0.461643	0.0152505	0.000680608	0.000644173	3	activated in tumors	Oncogene	TRUE
YY1	STK11	STK11 p.G279fs	6	7032	1.41324	0.00229425	1.41095	0.438751	0.793095	1.77948	3.21583	1.77904	1.72012e-05	1.39277	0.893487	0.00769353	0.00138151	4	activated in tumors	TSG	TRUE
EZH2	CTNNB1	CTNNB1 hotspot T41	147	6783	-0.287743	0.00717377	-0.294917	0.818961	0.814979	-0.361833	0.360111	0.36187	1.73011e-05	-0.292277	0.119232	0.977917	0.00146027	4	activated in tumors	Oncogene	TRUE
TCF3	CTNNB1	CTNNB1 interface BTRC	80	6783	-0.387448	0.0257786	-0.413227	0.740652	0.847531	-0.48823	0.557923	0.487565	1.73925e-05	-0.409122	0.0153416	0.461951	0.00146027	5	deactivated in tumors	Oncogene	TRUE
NFKB1	HRAS	HRAS p.Q61R	15	7081	-0.826078	0.0104074	-0.836485	0.51857	0.751772	-1.11326	1.61306	1.11268	1.75866e-05	-0.834328	0.643911	0.00087616	0.000277681	3	no differential activity	Oncogene	TRUE
FOSL2	PIK3CA	PIK3CA p.E542K	135	6014	0.217732	-0.0298115	0.247543	0.751128	0.68435	0.360916	0.329562	0.36172	1.76699e-05	0.256574	0.14128	0.000313322	0.000959999	3	no differential activity	Oncogene	TRUE
ELK1	KEAP1	KEAP1 truncating	35	6941	0.511372	-0.00557455	0.516947	0.658913	0.710619	0.727708	0.784544	0.72746	1.77e-05	0.517273	0.197839	0.127987	0.0004779	4	activated in tumors	Oncogene	TRUE
RUNX2	BRAF	BRAF hotspot T599	494	6510	0.126276	-0.00236164	0.128638	0.646108	0.719615	0.179992	0.199097	0.17876	1.77825e-05	0.144083	2.19058e-05	0.147454	0.000289378	4	no differential activity	Oncogene	TRUE
PBX1	CHD4	CHD4 truncating	41	6885	-0.43683	0.0135061	-0.450336	0.63392	0.659324	-0.683176	0.7104	0.683027	1.79036e-05	-0.443121	0.0322474	0.0092196	0.00696676	4	deactivated in tumors	Oncogene	TRUE
ESR1	MSH6	MSH6 p.T1085fs // MSH6 p.T783fs // MSH6 p.T955fs	26	7000	-0.599298	0.0267777	-0.626075	0.988898	0.742621	-0.841904	0.633104	0.843062	1.80221e-05	-0.627689	0.47467	0.0341022	0.0003557	4	deactivated in tumors	TSG	TRUE
E2F6	ERCC2	ERCC2 missense	83	7073	0.388632	0.00631105	0.382321	0.753135	0.807403	0.473873	0.50764	0.47352	1.80249e-05	0.382354	0.425108	0.142993	0.000637096	3	activated in tumors	Oncogene	TRUE
NFKB1	CTNNB1	CTNNB1 hotspot S37	185	6783	-0.223934	0.0155187	-0.239453	0.625287	0.756029	-0.318055	0.382949	0.316725	1.80742e-05	-0.240643	0.580282	0.00175534	0.00149088	2	no differential activity	Oncogene	TRUE
SP1	HRAS	HRAS 3D hotspot 5-164-1bkd	53	7081	-0.421097	0.0152871	-0.436384	0.836385	0.738274	-0.590478	0.521751	0.591087	1.81685e-05	-0.437082	0.67674	0.329023	0.000283282	3	no differential activity	Oncogene	TRUE
E2F1	CDKN1B	CDKN1B truncating	36	7114	0.463167	0.0145708	0.448596	0.778047	0.63446	0.706182	0.576567	0.707052	1.81992e-05	0.454781	0.0333084	0.000236632	0.00272988	2	activated in tumors	TSG	TRUE
LEF1	PIK3CA	PIK3CA 3D hotspot 5-1062-3hiz	519	6014	0.160825	0.00113585	0.159689	0.828574	0.777714	0.20424	0.192728	0.205331	1.82435e-05	0.154439	0.288249	0.0347963	0.00097627	4	deactivated in tumors	Oncogene	TRUE
TP53	PIK3CA	PIK3CA interface PIK3R1	580	6014	0.130198	-0.0105714	0.140769	0.769626	0.735431	0.190616	0.182906	0.19141	1.83362e-05	0.138619	0.610779	0.315031	0.00097627	2	deactivated in tumors	Oncogene	TRUE
E2F4	MMP2	MMP2 missense	87	7064	0.324839	0.0101903	0.314649	0.695479	0.68952	0.456282	0.45242	0.45633	1.85446e-05	0.318214	0.00122221	7.28795e-05	0.00185446	3	activated in tumors	Oncogene	TRUE
PAX6	NR4A2	NR4A2 missense	68	7068	-0.367328	0.0109673	-0.378295	0.662667	0.720828	-0.525189	0.570868	0.524807	1.85704e-05	-0.375988	0.0186639	0.199638	0.000857095	4	deactivated in tumors	TSG	TRUE
BACH1	TP53	TP53 truncating	800	4377	0.111695	-0.0105522	0.122247	0.76413	0.750441	0.16244	0.159982	0.162901	1.85906e-05	0.124083	0.00535697	0.0427006	0.00141363	3	no differential activity	TSG	TRUE
TP53	HRAS	HRAS p.12	16	7081	0.793106	0.00638844	0.786717	0.725208	0.739934	1.06327	1.08482	1.06323	1.87267e-05	0.793146	0.746213	0.0888922	0.000286507	1	deactivated in tumors	Oncogene	TRUE
CREB1	MLLT4	MLLT4 missense	126	7002	0.337422	0.00952733	0.327895	0.881108	0.859764	0.381209	0.372139	0.381378	1.87636e-05	0.330948	0.0127696	0.130637	0.000735656	4	activated in tumors	TSG	TRUE
FOSL2	TP53	TP53 Stability uniprot = D	218	4377	-0.129906	0.0667705	-0.196676	0.690996	0.659173	-0.297674	0.284627	0.298369	1.87736e-05	-0.19645	0.69475	0.211005	0.00142015	3	no differential activity	TSG	TRUE
FOXI1	BRAF	BRAF hotspot S602	483	6510	0.185923	0.0191465	0.166777	0.699952	0.764593	0.219353	0.238269	0.218125	1.88269e-05	0.154636	0.017761	0.12022	0.000304185	5	deactivated in tumors	Oncogene	TRUE
BACH1	HRAS	HRAS interface AFDN	28	7081	-0.579177	0.0261146	-0.605291	0.816476	0.753897	-0.80262	0.741346	0.802883	1.88347e-05	-0.611416	0.0400314	0.770187	0.000286507	4	no differential activity	Oncogene	TRUE
LEF1	PIK3CA	PIK3CA 3D hotspot 8-1059-4l23	538	6014	0.158126	0.00113585	0.15699	0.82844	0.777714	0.200756	0.189501	0.201861	1.88368e-05	0.151678	0.305872	0.0395596	0.000992994	4	deactivated in tumors	Oncogene	TRUE
STAT2	TCF7L2	TCF7L2 p.461del // TCF7L2 p.462del // TCF7L2 p.468del // TCF7L2 p.485del	7	7051	1.36214	0.000227254	1.36192	1.28143	0.830793	1.63834	1.06281	1.6393	1.90116e-05	1.34513	0.143023	0.00796543	0.011407	4	activated in tumors	TSG	TRUE
GABPA	CARD11	CARD11 truncating	35	6914	0.561676	-0.00510376	0.56678	0.595833	0.781929	0.725593	0.95124	0.724848	1.90437e-05	0.566652	0.516252	0.0689537	0.000676551	4	activated in tumors	Oncogene	TRUE
CREB1	CAD	CAD missense	162	6969	0.294456	0.00666472	0.287792	0.989393	0.855397	0.335166	0.290877	0.336442	1.91252e-05	0.291947	0.0108965	0.15064	0.000860633	3	activated in tumors	Oncogene	TRUE
CREB1	JAK2	JAK2 missense	120	7014	0.344367	0.00926141	0.335105	0.842163	0.85933	0.39009	0.39791	0.389961	1.91303e-05	0.338277	0.0130577	0.125235	0.0100434	3	activated in tumors	Oncogene	TRUE
FOS	GATA3	GATA3 truncating	107	6972	0.300626	0.0166444	0.283982	0.781395	0.674013	0.420248	0.363429	0.42133	1.93097e-05	0.282703	0.0305942	0.701832	0.000816526	3	activated in tumors	TSG	TRUE
JUN	FGFR3	FGFR3 interface FGF8 // FGFR3 3D hotspot 150-357-2fdb	26	7059	-0.608275	0.00984792	-0.618123	0.83061	0.715065	-0.863897	0.74418	0.86443	1.93149e-05	-0.601597	0.236955	0.0365051	0.00118523	3	deactivated in tumors	Oncogene	TRUE
TP53	MLLT4	MLLT4 missense	126	7002	0.287623	0.00314783	0.284475	0.8138	0.737712	0.384887	0.349564	0.385619	1.94945e-05	0.283926	0.981444	0.106643	0.000735656	3	deactivated in tumors	TSG	TRUE
GABPA	SMARCA4	SMARCA4 truncating	30	6895	0.61087	-0.00514397	0.616014	0.699829	0.785372	0.784698	0.880236	0.784359	1.94998e-05	0.613752	0.421439	0.0576401	0.000731813	4	activated in tumors	TSG	TRUE
SMAD3	STK11	STK11 interface STK24	7	7032	-1.32105	0.0246392	-1.34569	1.26632	0.828691	-1.62295	1.06268	1.62387	1.95069e-05	-1.33746	0.000188799	0.000221421	0.00141293	3	deactivated in tumors	TSG	TRUE
VDR	SMARCA4	SMARCA4 truncating	30	6895	-0.557282	0.00925719	-0.56654	0.755744	0.721485	-0.785081	0.749645	0.78524	1.9515e-05	-0.564101	0.543824	0.020531	0.000731813	2	deactivated in tumors	TSG	TRUE
E2F1	MLLT4	MLLT4 missense	126	7002	0.254756	0.0136382	0.241118	0.677066	0.634536	0.37953	0.356122	0.379991	1.96175e-05	0.243718	0.0401037	0.000221402	0.000735656	3	activated in tumors	TSG	TRUE
ELK1	CDH1	CDH1 truncating	122	6863	-0.276361	0.0117868	-0.288148	0.669282	0.712739	-0.404698	0.430533	0.404283	1.96581e-05	-0.27939	0.420446	0.256486	0.000737179	4	activated in tumors	TSG	TRUE
E2F1	ARID1A	ARID1A missense	193	6602	0.202094	0.0110864	0.191008	0.697245	0.629893	0.302278	0.273946	0.303238	1.97594e-05	0.197224	0.00819316	0.00440125	0.00271692	1	activated in tumors	TSG	TRUE
TP53	PTEN	PTEN p.T321fs	10	6484	0.990348	-0.00407514	0.994423	0.614746	0.735275	1.35273	1.61762	1.35245	1.99843e-05	0.993092	0.74673	0.130242	0.00474357	1	deactivated in tumors	TSG	TRUE
YY1	BRAF	BRAF hotspot S602	483	6510	-0.144645	0.0181624	-0.162808	0.742275	0.797297	-0.205144	0.219336	0.2042	2.03602e-05	-0.160751	0.766574	0.00381662	0.000326625	3	activated in tumors	Oncogene	TRUE
FOS	TP53	TP53 3D hotspot 95-290-1gzh	333	4377	0.104199	-0.0542338	0.158433	0.671623	0.659863	0.239796	0.235896	0.2401	2.04787e-05	0.160288	0.0204922	0.0163299	0.00154115	2	activated in tumors	TSG	TRUE
FOSL2	TP53	TP53 p.280	31	4377	-0.444922	0.0667705	-0.511692	0.904421	0.659173	-0.773943	0.565768	0.776264	2.06722e-05	-0.508228	0.683608	0.192301	0.00154774	3	no differential activity	TSG	TRUE
PBX1	SMARCA4	SMARCA4 truncating	30	6895	-0.501841	0.0140251	-0.515866	0.496706	0.659452	-0.782975	1.03858	0.782266	2.09373e-05	-0.51287	0.028837	0.00591026	0.000732806	2	deactivated in tumors	TSG	TRUE
STAT2	B2M	B2M truncating	55	7073	0.481883	-0.00220043	0.484083	0.948293	0.830301	0.58235	0.510479	0.583021	2.09387e-05	0.478959	0.143187	0.00769462	0.00557643	4	activated in tumors	TSG	TRUE
ATF1	TP53	TP53 3D hotspot 95-290-1gzh	333	4377	0.141284	-0.0329488	0.174233	0.772481	0.74829	0.232304	0.22555	0.232842	2.10482e-05	0.181327	1.75397e-06	0.00439881	0.00156785	2	activated in tumors	TSG	TRUE
GATA2	AXIN2	AXIN2 truncating	44	7041	-0.487478	0.0170497	-0.504528	0.841832	0.777778	-0.648341	0.599322	0.648679	2.10689e-05	-0.501062	0.540673	0.0213219	0.000948099	6	activated in tumors	TSG	TRUE
GATA2	MLH1	MLH1 p.T254fs // MLH1 p.T397fs // MLH1 p.T495fs	10	7031	-1.0381	0.0155827	-1.05368	1.48336	0.775173	-1.35698	0.710333	1.35928	2.10722e-05	-1.04571	0.409426	0.0290912	0.00421445	6	activated in tumors	TSG	TRUE
TP53	ZMYM2	ZMYM2 truncating	34	7054	0.550689	0.00427672	0.546412	0.860515	0.739304	0.73848	0.634983	0.73909	2.10828e-05	0.541703	0.85723	0.108756	0.00474362	3	deactivated in tumors	TSG	TRUE
MYB	PTEN	PTEN p.R130G	27	6484	0.596544	-0.0190827	0.615626	0.824109	0.759847	0.809912	0.74702	0.810197	2.1113e-05	0.625244	0.23404	0.136777	0.00474357	4	deactivated in tumors	TSG	TRUE
E2F4	ERCC2	ERCC2 missense	83	7073	0.331263	0.0101431	0.32112	0.621539	0.690338	0.46567	0.516653	0.465164	2.12365e-05	0.323499	0.000853442	8.90773e-05	0.000637096	3	activated in tumors	Oncogene	TRUE
HIF1A	SETD2	SETD2 missense	205	6852	0.218701	0.00759277	0.211108	0.820906	0.697499	0.300993	0.257165	0.302664	2.1247e-05	0.211622	0.683167	0.839919	0.00423717	4	activated in tumors	TSG	TRUE
E2F7	MSH6	MSH6 p.T1085fs // MSH6 p.T783fs // MSH6 p.T955fs	26	7000	0.51048	0.00995304	0.500527	0.4349	0.62715	0.798837	1.1509	0.798098	2.17363e-05	0.523321	0.0111396	0.00184977	0.000407555	4	activated in tumors	TSG	TRUE
PAX6	HRAS	HRAS interface RASA1	69	7081	-0.361258	0.0108213	-0.372079	0.585874	0.721289	-0.516691	0.635085	0.515854	2.19783e-05	-0.369828	0.0190243	0.253781	0.000330275	4	deactivated in tumors	Oncogene	TRUE
FOS	GATA3	GATA3 p.N333fs // GATA3 p.N334fs	10	6972	0.928452	0.0166444	0.911808	0.769594	0.674013	1.35254	1.18479	1.35281	2.20431e-05	0.906442	0.0392079	0.667402	0.000869969	3	activated in tumors	TSG	TRUE
RELA	HRAS	HRAS hotspot Y64	30	7081	-0.540873	0.00642155	-0.547294	0.654996	0.707711	-0.773556	0.835569	0.77333	2.22415e-05	-0.549196	0.423958	0.00150704	0.000330275	3	no differential activity	Oncogene	TRUE
CREB1	CREBBP	CREBBP missense	282	6820	0.218243	0.00614316	0.2121	0.90385	0.858681	0.24648	0.234663	0.247007	2.22583e-05	0.222488	0.00782252	0.13455	0.00379011	1	activated in tumors	TSG	TRUE
ZEB1	TP53	TP53 DNA/RNA aff. disabling	467	4377	-0.104381	0.0244498	-0.128831	0.656615	0.619732	-0.206667	0.196205	0.207882	2.25425e-05	-0.128691	0.353128	0.0288277	0.00166394	3	no differential activity	TSG	TRUE
FOS	TP53	TP53 hotspot T284	209	4377	0.140981	-0.0542338	0.195215	0.651163	0.659863	0.296017	0.299794	0.295841	2.2602e-05	0.198198	0.0531902	0.109788	0.00166394	2	activated in tumors	TSG	TRUE
STAT3	STK11	STK11 p.G279fs	6	7032	-1.25469	0.0109921	-1.26569	0.705248	0.722499	-1.75184	1.79467	1.75182	2.26408e-05	-1.25113	0.436722	0.0333519	0.00141293	3	deactivated in tumors	TSG	TRUE
FOS	TP53	TP53 interface TP53BP1 // TP53 3D hotspot 95-289-1kzy // TP53 3D hotspot 95-292-1gzh	353	4377	0.100332	-0.0542338	0.154566	0.668016	0.659863	0.234022	0.23138	0.234239	2.26802e-05	0.155112	0.0306188	0.0193972	0.00166394	2	activated in tumors	TSG	TRUE
ETS1	CARD11	CARD11 truncating	35	6914	0.567209	-0.00367935	0.570889	0.643276	0.799161	0.714976	0.887471	0.71436	2.27477e-05	0.573682	0.757026	0.00603356	0.000761489	4	activated in tumors	Oncogene	TRUE
SP1	HRAS	HRAS 3D hotspot 5-163-4lwz // HRAS p.61	27	7081	-0.588787	0.0152871	-0.604074	0.723724	0.738274	-0.818284	0.834675	0.818225	2.27898e-05	-0.603532	0.737921	0.313151	0.000334436	3	no differential activity	Oncogene	TRUE
SMAD3	STK11	STK11 missense	69	7032	-0.414727	0.0246392	-0.439366	1.033	0.828691	-0.528792	0.425331	0.530193	2.287e-05	-0.425426	0.000171655	0.000333843	0.00141293	3	deactivated in tumors	TSG	TRUE
IRF1	B2M	B2M truncating	55	7073	0.491683	0.00765581	0.484027	0.955056	0.837471	0.577306	0.506804	0.577963	2.28777e-05	0.480905	0.482829	0.0116548	0.00557643	5	no differential activity	TSG	TRUE
RUNX1	BRAF	BRAF activitygain	467	6510	0.132191	-0.0235011	0.155692	0.885324	0.795313	0.194216	0.175858	0.195762	2.29287e-05	0.164021	0.0776576	0.972801	0.000365239	3	deactivated in tumors	Oncogene	TRUE
VDR	AXIN1	AXIN1 truncating	33	7061	-0.531651	0.00660283	-0.538254	0.717858	0.72307	-0.744426	0.749806	0.744402	2.30247e-05	-0.534347	0.509402	0.0172442	0.00207437	4	deactivated in tumors	TSG	TRUE
STAT1	HRAS	HRAS interface AFDN	28	7081	-0.618981	0.0166021	-0.635583	0.595943	0.799186	-0.795959	1.06652	0.795288	2.31147e-05	-0.640033	0.779733	0.000276414	0.000335259	2	deactivated in tumors	Oncogene	TRUE
E2F6	JAK1	JAK1 truncating	43	7025	0.527753	0.00505651	0.522697	0.796306	0.806958	0.647788	0.656402	0.647737	2.32081e-05	0.522858	0.359679	0.133647	0.00434556	3	activated in tumors	Oncogene	TRUE
NR1I2	CHD4	CHD4 truncating	41	6885	0.503986	-0.0040056	0.507991	0.673033	0.764622	0.664802	0.754779	0.664369	2.32225e-05	0.507128	0.824606	0.810673	0.00696676	4	deactivated in tumors	Oncogene	TRUE
E2F1	TP53	TP53 interface BCL2L1	418	4377	0.0876923	-0.0480138	0.135706	0.633611	0.62954	0.215442	0.214179	0.215564	2.32971e-05	0.136366	0.0436399	1.8159e-06	0.00170065	2	activated in tumors	TSG	TRUE
TP53	DNMT1	DNMT1 p.K130fs	16	7015	-0.780346	0.00743923	-0.787785	0.721591	0.739346	-1.06557	1.09173	1.06552	2.34182e-05	-0.783216	0.861327	0.0997929	0.00526909	1	deactivated in tumors	Oncogene	TRUE
RUNX1	TGFBR2	TGFBR2 p.E125fs // TGFBR2 p.E150fs	24	7035	0.690905	-0.0138257	0.70473	1.03572	0.802038	0.87772	0.680425	0.878674	2.34524e-05	0.695782	0.23929	0.967089	0.00133008	4	deactivated in tumors	TSG	TRUE
TP53	CIC	CIC truncating	86	6893	0.340756	0.000648151	0.340107	0.648986	0.742571	0.458674	0.52406	0.458014	2.36647e-05	0.340307	0.931444	0.0863821	0.00452274	2	deactivated in tumors	TSG	TRUE
STAT2	HSPA8	HSPA8 interface BAG3	5	7068	1.57869	0.0021271	1.57657	0.785707	0.830791	1.89773	2.00656	1.89767	2.36656e-05	1.57126	0.125962	0.00501539	0.00518378	3	activated in tumors	Oncogene	TRUE
YY1	CARD11	CARD11 p.R555fs	20	6914	0.74369	0.00280963	0.74088	0.483754	0.794452	0.933373	1.53152	0.932568	2.36908e-05	0.752448	0.880448	0.0036582	0.000761489	4	activated in tumors	Oncogene	TRUE
NR3C1	KRAS	KRAS p.G13C	10	6615	1.0519	0.000611218	1.05128	0.623157	0.784239	1.34085	1.68703	1.34052	2.37526e-05	1.04931	0.0511438	0.452101	0.00114577	4	deactivated in tumors	Oncogene	TRUE
FOXM1	MSH6	MSH6 p.T1085fs // MSH6 p.T783fs // MSH6 p.T955fs	26	7000	0.463012	0.00763245	0.45538	0.325061	0.579091	0.78733	1.40091	0.786369	2.38547e-05	0.480373	0.00580625	1.90082e-05	0.000425977	4	activated in tumors	TSG	TRUE
STAT1	CTNNB1	CTNNB1 hotspot S29	117	6783	-0.29469	0.0228475	-0.317538	0.709194	0.801814	-0.396751	0.447745	0.396024	2.38707e-05	-0.31532	0.863329	0.000169583	0.00191217	2	deactivated in tumors	Oncogene	TRUE
STAT1	HRAS	HRAS interface RAPGEF2 // HRAS 3D hotspot 5-162-3cf6	31	7081	-0.583422	0.0166021	-0.600025	0.591895	0.799186	-0.751511	1.01374	0.750794	2.38888e-05	-0.607277	0.771539	0.000263608	0.000342504	2	deactivated in tumors	Oncogene	TRUE
STAT1	CTNNB1	CTNNB1 interface BTRC	80	6783	-0.360526	0.0228475	-0.383374	0.753161	0.801814	-0.478458	0.50902	0.478133	2.3995e-05	-0.380627	0.87074	0.000227574	0.00191217	2	deactivated in tumors	Oncogene	TRUE
PPARA	NFE2L2	NFE2L2 interface KEAP1 // NFE2L2 3D hotspot 69-84-4ifl	54	6974	0.432232	-0.0178401	0.450072	0.708111	0.791576	0.569006	0.635596	0.568577	2.41743e-05	0.456741	0.0461612	0.345534	0.00857175	3	deactivated in tumors	Oncogene	TRUE
PPARA	NFE2L2	NFE2L2 3D hotspot 69-84-2flu	54	6974	0.432232	-0.0178401	0.450072	0.708111	0.791576	0.569006	0.635596	0.568577	2.41743e-05	0.456741	0.0461612	0.345534	0.00857175	3	deactivated in tumors	Oncogene	TRUE
RELA	HRAS	HRAS 3D hotspot 1-166-1nvx	33	7081	-0.51207	0.00642155	-0.518492	0.688269	0.707711	-0.732721	0.753327	0.732632	2.4186e-05	-0.52144	0.40825	0.0013003	0.000342825	3	no differential activity	Oncogene	TRUE
ESR1	TP53	TP53 interface BCL2	434	4377	-0.0670116	0.0908228	-0.157834	0.751755	0.707762	-0.221729	0.209955	0.223005	2.43159e-05	-0.151074	0.0560227	1.57462e-07	0.0017662	3	deactivated in tumors	TSG	TRUE
JUN	KRAS	KRAS interface ZDHHC17	400	6615	0.152409	-0.00119291	0.153602	0.72047	0.714666	0.214829	0.213198	0.214929	2.43784e-05	0.156175	0.1352	0.0374474	0.00114577	3	deactivated in tumors	Oncogene	TRUE
EZH2	CTNNB1	CTNNB1 interface BTRC	80	6783	-0.381415	0.00717377	-0.388588	0.714545	0.814979	-0.477444	0.543826	0.476808	2.45477e-05	-0.386475	0.133749	0.985332	0.00192361	4	activated in tumors	Oncogene	TRUE
FOXM1	TP53	TP53 interaction disrupting BCL2L1	111	4377	0.143155	-0.0786171	0.221773	0.567384	0.571004	0.388451	0.390868	0.388391	2.4789e-05	0.230447	0.00680083	2.34736e-11	0.00179164	2	activated in tumors	TSG	TRUE
NRF1	TP53	TP53 p.Y220C	53	4377	0.318947	-0.104357	0.423305	0.891305	0.739101	0.571207	0.474927	0.572729	2.50209e-05	0.430188	0.00384824	3.8542e-09	0.0017995	6	activated in tumors	TSG	TRUE
STAT3	NRAS	NRAS missense	221	6936	-0.192958	0.0157011	-0.208659	0.747673	0.721465	-0.288887	0.279078	0.289216	2.53075e-05	-0.208064	0.367373	0.0226224	0.000721746	4	deactivated in tumors	Oncogene	TRUE
SP1	HRAS	HRAS 3D hotspot 1-166-1nvx	33	7081	-0.527056	0.0152871	-0.542343	0.735856	0.738274	-0.73462	0.737023	0.734609	2.53484e-05	-0.543021	0.692842	0.312457	0.000355265	3	no differential activity	Oncogene	TRUE
YY1	BRAF	BRAF p.600	460	6510	-0.147024	0.0181624	-0.165187	0.740766	0.797297	-0.208123	0.222994	0.207183	2.5364e-05	-0.162672	0.777862	0.00432768	0.000401207	3	activated in tumors	Oncogene	TRUE
FOXM1	TP53	TP53 p.175	118	4377	0.13974	-0.0786171	0.218357	0.564888	0.571004	0.382516	0.38655	0.38241	2.53675e-05	0.223341	0.00638949	2.44058e-11	0.00181548	2	activated in tumors	TSG	TRUE
ETS1	CTNNB1	CTNNB1 hotspot S37	185	6783	0.245374	-0.00713745	0.252512	0.718661	0.804624	0.314667	0.351364	0.313825	2.54008e-05	0.251976	0.561967	0.00789796	0.00195783	4	activated in tumors	Oncogene	TRUE
STAT1	CASP8	CASP8 missense	92	7006	0.363328	0.00810583	0.355222	0.903198	0.796704	0.445051	0.393293	0.445864	2.54404e-05	0.352916	0.595355	0.000320887	0.00257791	2	deactivated in tumors	TSG	TRUE
LEF1	PIK3CA	PIK3CA 3D hotspot 2-1061-4jps	543	6014	0.154853	0.00113585	0.153717	0.831172	0.777714	0.196501	0.184941	0.197653	2.56571e-05	0.148675	0.282093	0.043517	0.00132988	4	deactivated in tumors	Oncogene	TRUE
LEF1	PIK3CA	PIK3CA 3D hotspot 5-1062-3hhm	513	6014	0.159167	0.00113585	0.158031	0.830603	0.777714	0.202087	0.19026	0.203199	2.57269e-05	0.152513	0.287405	0.0329556	0.00132988	4	deactivated in tumors	Oncogene	TRUE
STAT2	CASP8	CASP8 truncating	67	7006	0.42677	-0.00672616	0.433497	1.0205	0.823964	0.524805	0.42479	0.526111	2.57791e-05	0.427134	0.422892	0.00922517	0.00257791	3	activated in tumors	TSG	TRUE
PBX1	HRAS	HRAS 3D hotspot 5-164-1bkd	53	7081	-0.373417	0.00957285	-0.38299	0.629929	0.660286	-0.580226	0.607989	0.580036	2.58042e-05	-0.382858	0.0122995	0.00683554	0.000356285	4	deactivated in tumors	Oncogene	TRUE
ZEB1	BRAF	BRAF hotspot T599	494	6510	0.113711	-0.00872728	0.122438	0.695835	0.620591	0.195531	0.175959	0.197293	2.59028e-05	0.123896	0.386042	0.0608007	0.000406884	4	no differential activity	Oncogene	TRUE
E2F7	TP53	TP53 interface TP63	161	4377	0.169912	-0.0438711	0.213783	0.64223	0.63579	0.336127	0.332876	0.336247	2.6024e-05	0.214666	0.00944085	0.000115914	0.00185338	3	activated in tumors	TSG	TRUE
SP1	HRAS	HRAS 3D hotspot 1-166-4nym	54	7081	-0.409023	0.0152871	-0.42431	0.833195	0.738274	-0.574149	0.509256	0.574732	2.60526e-05	-0.424865	0.673524	0.334541	0.000356285	3	no differential activity	Oncogene	TRUE
YY1	KEAP1	KEAP1 truncating	35	6941	0.570751	-0.00186475	0.572616	0.704086	0.792708	0.722726	0.813276	0.722354	2.61921e-05	0.564965	0.945549	0.00661952	0.000679986	4	activated in tumors	Oncogene	TRUE
SPI1	HRAS	HRAS 3D hotspot 5-163-4lwz // HRAS p.61	27	7081	-0.626147	0.00592544	-0.632073	0.63815	0.771262	-0.820003	0.990477	0.81953	2.62781e-05	-0.625049	0.0220018	0.0417703	0.000356285	4	activated in tumors	Oncogene	TRUE
STAT2	CUL1	CUL1 truncating	17	7053	0.838351	0.00028621	0.838064	1.01009	0.82789	1.01173	0.829691	1.01229	2.64444e-05	0.845687	0.157594	0.00905069	0.00694165	3	activated in tumors	TSG	TRUE
CREB1	BCLAF1	BCLAF1 missense	239	6893	0.241961	0.00617255	0.235788	0.918599	0.857557	0.27428	0.256683	0.274954	2.6494e-05	0.238114	0.0107568	0.185472	0.0026494	4	activated in tumors	Oncogene	TRUE
STAT1	TGFBR2	TGFBR2 truncating	43	7035	0.531263	0.0107243	0.520539	0.862351	0.79933	0.650903	0.603628	0.651219	2.66015e-05	0.514281	0.776158	0.000194525	0.00133008	3	deactivated in tumors	TSG	TRUE
IRF1	PIK3CA	PIK3CA missense	1097	6014	0.115837	-0.00847127	0.124309	0.927938	0.821078	0.148262	0.133962	0.151397	2.66225e-05	0.117229	0.824843	0.0861641	0.00136294	4	no differential activity	Oncogene	TRUE
ETS1	STK11	STK11 p.G279fs	6	7032	1.38897	-0.00292941	1.3919	0.373754	0.800686	1.73887	3.72411	1.73838	2.67912e-05	1.37357	0.712391	0.00970432	0.00153695	4	activated in tumors	TSG	TRUE
GATA2	BRAF	BRAF interaction disrupting MAP2K1	469	6510	0.164479	0.00299379	0.161485	0.69287	0.782414	0.207904	0.233067	0.206394	2.68642e-05	0.157156	0.713996	0.0292384	0.000418165	5	activated in tumors	Oncogene	TRUE
TP53	ARID1A	ARID1A p.G1465fs // ARID1A p.G1631fs // ARID1A p.G1848fs	27	6602	0.589559	-0.00211462	0.591674	0.614651	0.73344	0.807182	0.962618	0.806711	2.69092e-05	0.594302	0.518947	0.14409	0.00286229	3	deactivated in tumors	TSG	TRUE
YY1	BRAF	BRAF interaction increasing MAP2K1 // BRAF p.V600E	457	6510	-0.147144	0.0181624	-0.165306	0.737052	0.797297	-0.208328	0.224281	0.207334	2.69907e-05	-0.162611	0.7753	0.00431863	0.000418165	3	activated in tumors	Oncogene	TRUE
PPARA	CTNNB1	CTNNB1 3D hotspot 151-665-3oux	29	6783	0.608221	-0.0128617	0.621083	0.718779	0.794169	0.782344	0.864081	0.782053	2.71339e-05	0.620842	0.0664252	0.149161	0.00205768	2	deactivated in tumors	Oncogene	TRUE
BACH1	HRAS	HRAS 3D hotspot 5-164-1nvw	29	7081	-0.557723	0.0261146	-0.583837	0.810045	0.753897	-0.774191	0.720747	0.774426	2.73939e-05	-0.588954	0.0414171	0.777109	0.00036742	4	no differential activity	Oncogene	TRUE
MYCN	AXIN1	AXIN1 missense	67	7061	0.40326	0.0109438	0.392316	0.882955	0.759011	0.516035	0.444322	0.516878	2.76583e-05	0.391498	0.079714	0.00124091	0.00207437	3	activated in tumors	TSG	TRUE
STAT2	ARID1A	ARID1A p.G1465fs // ARID1A p.G1631fs // ARID1A p.G1848fs	27	6602	0.670585	-0.00239599	0.672981	0.945001	0.820351	0.819831	0.712148	0.820357	2.77555e-05	0.664133	0.279136	0.00590983	0.00286229	4	activated in tumors	TSG	TRUE
LEF1	PIK3CA	PIK3CA interface PIK3R1	580	6014	0.149528	0.00113585	0.148392	0.828463	0.777714	0.189686	0.179117	0.190805	2.78871e-05	0.143556	0.260522	0.0306792	0.0014044	4	deactivated in tumors	Oncogene	TRUE
FOSL2	PIK3CA	PIK3CA p.545	240	6014	0.150221	-0.0298115	0.180032	0.67225	0.68435	0.263247	0.267806	0.263071	2.79599e-05	0.189416	0.119266	0.000486505	0.0014044	3	no differential activity	Oncogene	TRUE
ESR1	TP53	TP53 3D hotspot 96-290-2mej	433	4377	-0.06589	0.0908228	-0.156713	0.75315	0.707762	-0.220115	0.208076	0.22142	2.80911e-05	-0.150076	0.0549877	1.35165e-07	0.00198328	3	deactivated in tumors	TSG	TRUE
FOXM1	TP53	TP53 interaction ZNF385A loss	109	4377	0.146029	-0.0786171	0.224646	0.572369	0.571004	0.393401	0.392485	0.393424	2.81196e-05	0.230944	0.00693	2.37262e-11	0.00198328	2	activated in tumors	TSG	TRUE
PBX1	MYCN	MYCN truncating	12	7102	-0.806605	0.00844569	-0.81505	0.871774	0.659357	-1.23542	0.934934	1.23613	2.8133e-05	-0.798491	0.015673	0.00900212	0.00624553	4	deactivated in tumors	Oncogene	TRUE
STAT3	NRAS	NRAS p.61	159	6936	-0.227113	0.0157011	-0.242814	0.77227	0.721465	-0.336012	0.314416	0.336557	2.81678e-05	-0.243188	0.315076	0.0314847	0.000779693	4	deactivated in tumors	Oncogene	TRUE
GATA2	BRAF	BRAF interaction increasing MAP2K1 // BRAF p.V600E	457	6510	0.166763	0.00299379	0.163769	0.692962	0.782414	0.210806	0.236332	0.209313	2.81928e-05	0.158863	0.713358	0.0254999	0.000433818	5	activated in tumors	Oncogene	TRUE
E2F4	SETD2	SETD2 missense	205	6852	0.20545	0.00728188	0.198169	0.745538	0.689631	0.286656	0.265806	0.287354	2.82478e-05	0.205025	0.000397902	4.22301e-05	0.00423717	3	activated in tumors	TSG	TRUE
MAX	PIK3CA	PIK3CA p.1047	246	6014	-0.199926	0.0210382	-0.220964	0.815976	0.764061	-0.288405	0.270797	0.289197	2.83151e-05	-0.210775	0.211022	0.0742929	0.00140895	4	activated in tumors	Oncogene	TRUE
HSF1	KRAS	KRAS missense	543	6615	0.13263	0.00266236	0.129967	0.677428	0.696067	0.187092	0.191854	0.186717	2.83513e-05	0.130651	0.916287	0.226919	0.0012933	4	activated in tumors	Oncogene	TRUE
PAX6	HRAS	HRAS interface RAPGEF2 // HRAS 3D hotspot 5-162-3cf6	31	7081	-0.524558	0.0108213	-0.535379	0.627565	0.721289	-0.742634	0.853106	0.742254	2.84921e-05	-0.54339	0.0165255	0.276289	0.000378084	4	deactivated in tumors	Oncogene	TRUE
GATA1	GATA3	GATA3 truncating	107	6972	-0.284867	0.0194733	-0.30434	0.642713	0.817347	-0.37342	0.473525	0.372351	2.8954e-05	-0.333444	0.713486	0.000145177	0.0010713	4	deactivated in tumors	TSG	TRUE
SOX2	NRAS	NRAS missense	221	6936	0.200436	-0.0126403	0.213076	0.842833	0.73026	0.290303	0.25281	0.291782	2.92346e-05	0.209795	0.256793	0.0306008	0.000786101	6	deactivated in tumors	Oncogene	TRUE
TP53	PIK3CA	PIK3CA 3D hotspot 5-1062-3hiz	519	6014	0.133813	-0.0105714	0.144384	0.765017	0.735431	0.19569	0.188733	0.196326	2.93721e-05	0.142142	0.635296	0.341523	0.00144801	2	deactivated in tumors	Oncogene	TRUE
E2F1	TP53	TP53 3D hotspot 96-290-2mej	433	4377	0.0842037	-0.0480138	0.132218	0.6339	0.62954	0.209891	0.208578	0.210023	2.95038e-05	0.132528	0.0406256	2.42305e-06	0.0020709	2	activated in tumors	TSG	TRUE
IRF1	HSPA8	HSPA8 interface BAG2	6	7068	1.45256	0.0116832	1.44088	0.891415	0.839165	1.71696	1.6164	1.71704	2.96216e-05	1.4319	0.453166	0.00821281	0.00518378	4	no differential activity	Oncogene	TRUE
FOSL2	TP53	TP53 p.G108fs	6	4377	-1.05201	0.0667705	-1.11878	0.887482	0.659173	-1.69646	1.26062	1.69725	2.96787e-05	-1.12658	0.79526	0.15919	0.0020732	3	no differential activity	TSG	TRUE
MYC	TP53	TP53 missense	1991	4377	0.044115	-0.0372769	0.0813919	0.740195	0.715004	0.112579	0.10996	0.113834	2.98377e-05	0.0816792	0.160707	8.6242e-05	0.00207439	2	activated in tumors	TSG	TRUE
PBX1	B2M	B2M truncating	55	7073	-0.366911	0.0093977	-0.376309	0.785987	0.65873	-0.570349	0.478773	0.571264	3.02627e-05	-0.372593	0.0174886	0.00582318	0.00590122	5	deactivated in tumors	TSG	TRUE
FOS	TP53	TP53 interaction disrupting BCL2L1	111	4377	0.206328	-0.0542338	0.260562	0.686998	0.659863	0.394467	0.379276	0.394873	3.03177e-05	0.264952	0.029484	0.0349661	0.00209777	2	activated in tumors	TSG	TRUE
GATA2	CIC	CIC truncating	86	6893	-0.332507	0.0201568	-0.352663	0.643407	0.780694	-0.452616	0.548119	0.45173	3.04908e-05	-0.35259	0.224826	0.00916235	0.00452274	5	activated in tumors	TSG	TRUE
ESR1	HRAS	HRAS 3D hotspot 1-166-1nvw	57	7081	-0.388653	0.0248029	-0.413456	0.73551	0.744719	-0.555238	0.562135	0.555184	3.05599e-05	-0.413049	0.343285	0.0393426	0.000401254	2	deactivated in tumors	Oncogene	TRUE
FOXM1	TP53	TP53 interaction increasing VRK1 // TP53 p.R175H	108	4377	0.145134	-0.0786171	0.223751	0.574961	0.571004	0.391791	0.389159	0.391856	3.15601e-05	0.230556	0.00692849	2.42012e-11	0.00217343	2	activated in tumors	TSG	TRUE
BACH1	HRAS	HRAS hotspot Y64	30	7081	-0.542293	0.0261146	-0.568408	0.800687	0.753897	-0.753763	0.7099	0.75396	3.18004e-05	-0.57443	0.0406381	0.781061	0.000413192	4	no differential activity	Oncogene	TRUE
TP53	KRAS	KRAS interface ZDHHC17	400	6615	0.153468	-0.00509524	0.158564	0.763745	0.737242	0.21463	0.207613	0.215077	3.20873e-05	0.159032	0.534947	0.165701	0.00142191	3	deactivated in tumors	Oncogene	TRUE
JUN	FGFR3	FGFR3 p.S249C // FGFR3 p.249	19	7059	-0.690208	0.00984792	-0.700056	0.566522	0.715065	-0.979475	1.23571	0.979011	3.20902e-05	-0.683583	0.266947	0.0381548	0.00180507	3	deactivated in tumors	Oncogene	TRUE
FOXM1	ATM	ATM missense	359	6712	0.130418	0.00479447	0.125624	0.540082	0.579042	0.217669	0.232601	0.216951	3.23445e-05	0.130142	0.00522804	2.36435e-05	0.00394199	2	activated in tumors	TSG	TRUE
CREB1	EZH2	EZH2 interface EED	10	7038	1.12836	0.0121605	1.1162	0.862849	0.859393	1.29882	1.29362	1.29882	3.24019e-05	1.13101	0.00692832	0.157704	0.00990008	3	activated in tumors	Oncogene	TRUE
ATF4	CTNNB1	CTNNB1 missense	354	6783	-0.187866	-0.00817931	-0.179687	0.840139	0.826921	-0.217123	0.213877	0.217296	3.25494e-05	-0.187744	0.0273943	0.00517891	0.00242918	3	activated in tumors	Oncogene	TRUE
IRF1	MSH6	MSH6 p.T1085fs // MSH6 p.T783fs // MSH6 p.T955fs	26	7000	0.704337	0.00929329	0.695044	0.985037	0.836372	0.83045	0.705602	0.831022	3.25668e-05	0.684384	0.811891	0.0110652	0.000539587	4	no differential activity	TSG	TRUE
SP1	HRAS	HRAS 3D hotspot 5-164-1nvw	29	7081	-0.555492	0.0152871	-0.570779	0.751002	0.738274	-0.773073	0.760023	0.773126	3.28592e-05	-0.571033	0.722995	0.306808	0.000422548	3	no differential activity	Oncogene	TRUE
TP53	PIK3CA	PIK3CA interaction increasing IRS1	426	6014	0.147606	-0.0105714	0.158177	0.772122	0.735431	0.214358	0.20486	0.215081	3.29416e-05	0.154781	0.696111	0.258886	0.00160909	2	deactivated in tumors	Oncogene	TRUE
SMAD4	STK11	STK11 missense	69	7032	-0.3747	0.0151903	-0.38989	0.809943	0.750974	-0.518774	0.48138	0.51918	3.30918e-05	-0.377415	0.000126149	0.0411016	0.00171169	3	deactivated in tumors	TSG	TRUE
MYCN	MSH6	MSH6 p.T1085fs // MSH6 p.T783fs // MSH6 p.T955fs	26	7000	0.606756	0.0107805	0.595976	0.728115	0.760255	0.784031	0.818519	0.783915	3.30947e-05	0.62063	0.0530738	0.000449316	0.000539587	3	activated in tumors	TSG	TRUE
PBX1	NR4A2	NR4A2 truncating	26	7068	-0.537286	0.0121264	-0.549412	0.789594	0.658926	-0.83316	0.695817	0.8338	3.31064e-05	-0.537891	0.0161871	0.00632491	0.00137002	5	deactivated in tumors	TSG	TRUE
RELA	GATA3	GATA3 truncating	107	6972	-0.255992	0.0103192	-0.266311	0.670194	0.707689	-0.376602	0.397364	0.376311	3.34128e-05	-0.287091	0.350249	0.00053427	0.00116355	3	no differential activity	TSG	TRUE
CEBPB	TP53	TP53 3D hotspot 96-288-2mej	501	4377	-0.0977384	0.0526016	-0.15034	0.778727	0.779406	-0.192908	0.193059	0.192891	3.34422e-05	-0.152729	0.0893568	0.824314	0.00229223	3	deactivated in tumors	TSG	TRUE
ATF1	EZH2	EZH2 interface EED	10	7038	0.999298	0.0177188	0.981579	0.769081	0.764031	1.28473	1.2763	1.28474	3.34462e-05	1.00233	3.33747e-06	0.00369323	0.00990008	3	activated in tumors	Oncogene	TRUE
SMAD4	CIC	CIC truncating	86	6893	-0.321705	0.0168091	-0.338514	0.69629	0.754529	-0.449049	0.486168	0.448643	3.35018e-05	-0.339067	0.000109863	0.0221988	0.00452274	3	deactivated in tumors	TSG	TRUE
FOXO3	RB1	RB1 truncating	155	6859	-0.272069	0.0157284	-0.287798	0.8419	0.854463	-0.336925	0.341843	0.336817	3.35345e-05	-0.288204	0.996377	0.769368	0.00307399	3	deactivated in tumors	TSG	TRUE
YY1	KEAP1	KEAP1 interface KEAP1	36	6941	0.55184	-0.00186475	0.553705	0.848122	0.792708	0.698244	0.65286	0.698498	3.40289e-05	0.549536	0.991247	0.00580057	0.000796651	4	activated in tumors	Oncogene	TRUE
FOXM1	PIK3CA	PIK3CA activitygain	599	6014	-0.0926186	0.0243339	-0.116952	0.647755	0.567746	-0.20324	0.18055	0.205994	3.4131e-05	-0.103397	0.0114663	0.00393963	0.00164557	3	activated in tumors	Oncogene	TRUE
SMAD4	NR4A2	NR4A2 missense	68	7068	-0.366766	0.0159865	-0.382752	0.669099	0.751839	-0.509587	0.572042	0.509089	3.42505e-05	-0.379072	0.000177709	0.0300362	0.00137002	3	deactivated in tumors	TSG	TRUE
GATA3	PIK3CA	PIK3CA p.545	240	6014	0.186958	0.0013729	0.185585	0.705118	0.692491	0.267808	0.263197	0.267996	3.43066e-05	0.189965	0.0511819	0.977166	0.00164557	4	deactivated in tumors	Oncogene	TRUE
CREB1	JAK1	JAK1 truncating	43	7025	0.54484	0.00868856	0.536151	0.790762	0.85768	0.625396	0.678018	0.625118	3.47644e-05	0.543232	0.00677285	0.187511	0.00434556	3	activated in tumors	Oncogene	TRUE
FOSL2	HRAS	HRAS p.12	16	7081	-0.700583	0.00300466	-0.703587	0.58512	0.684702	-1.02787	1.20247	1.02758	3.48607e-05	-0.709515	0.0550702	0.156786	0.000437051	3	no differential activity	Oncogene	TRUE
GATA2	BRAF	BRAF p.600	460	6510	0.16436	0.00299379	0.161366	0.694922	0.782414	0.207691	0.232208	0.206242	3.48689e-05	0.15653	0.699934	0.0243168	0.000532921	5	activated in tumors	Oncogene	TRUE
BACH1	KEAP1	KEAP1 missense	188	6941	-0.203375	0.0308874	-0.234263	0.75905	0.752989	-0.311045	0.308626	0.311111	3.48794e-05	-0.231093	0.0822769	0.563506	0.000796651	3	no differential activity	Oncogene	TRUE
PPARD	TP53	TP53 hotspot T155	173	4377	-0.183227	0.0449838	-0.228211	0.679459	0.684973	-0.333269	0.335872	0.333168	3.4881e-05	-0.220185	0.30345	0.00148594	0.00237969	4	deactivated in tumors	TSG	TRUE
PAX6	HRAS	HRAS interface RIN1	47	7081	-0.422468	0.0108213	-0.433289	0.641861	0.721289	-0.601119	0.675051	0.600715	3.4947e-05	-0.436739	0.0166841	0.283434	0.000437051	4	deactivated in tumors	Oncogene	TRUE
ETS1	HRAS	HRAS interface SOS2	69	7081	0.403589	-4.33748e-05	0.403632	0.652267	0.803825	0.502957	0.618814	0.502139	3.50381e-05	0.4018	0.611206	0.00390746	0.000437051	4	activated in tumors	Oncogene	TRUE
ESR1	KRAS	KRAS interface ZDHHC17	400	6615	0.170798	0.0130711	0.157727	0.697025	0.747824	0.211707	0.226287	0.210915	3.50631e-05	0.15956	0.232564	0.0555535	0.00151061	2	deactivated in tumors	Oncogene	TRUE
VDR	KEAP1	KEAP1 truncating	35	6941	-0.494976	0.0154789	-0.510455	0.5906	0.718097	-0.711406	0.864299	0.710845	3.52511e-05	-0.503514	0.60555	0.0486232	0.000796651	4	deactivated in tumors	Oncogene	TRUE
E2F1	TP53	TP53 p.249	39	4377	0.376104	-0.0480138	0.424118	0.568878	0.62954	0.674227	0.745534	0.673694	3.53304e-05	0.417745	0.0500492	4.78625e-07	0.00239913	2	activated in tumors	TSG	TRUE
GATA1	KEAP1	KEAP1 missense	188	6941	-0.237148	0.0227184	-0.259867	0.948185	0.811373	-0.318755	0.274068	0.320281	3.54067e-05	-0.249816	0.939651	0.00127859	0.000796651	6	deactivated in tumors	Oncogene	TRUE
PAX5	MSH6	MSH6 p.T1085fs // MSH6 p.T783fs // MSH6 p.T955fs	26	7000	-0.65481	0.0192636	-0.674073	0.911889	0.823627	-0.818092	0.739205	0.81842	3.55726e-05	-0.67057	0.223539	0.0907222	0.000555822	5	deactivated in tumors	TSG	TRUE
ESR1	TP53	TP53 p.R116fs	11	4377	-0.795489	0.0908228	-0.886312	1.12206	0.707762	-1.25012	0.7899	1.25227	3.56844e-05	-0.882002	0.0620116	3.43557e-09	0.00241195	3	deactivated in tumors	TSG	TRUE
PAX6	HRAS	HRAS 3D hotspot 5-164-1nvw	29	7081	-0.536584	0.0108213	-0.547405	0.646346	0.721289	-0.759222	0.846923	0.758927	3.58325e-05	-0.554738	0.0168219	0.278273	0.00044026	4	deactivated in tumors	Oncogene	TRUE
SPI1	HRAS	HRAS 3D hotspot 1-166-1nvx	33	7081	-0.55191	0.00592544	-0.557835	0.694334	0.771262	-0.723584	0.803411	0.723276	3.60013e-05	-0.555956	0.0204241	0.0368724	0.00044026	4	activated in tumors	Oncogene	TRUE
RUNX1	BRAF	BRAF interaction disrupting MAP2K1	469	6510	0.127927	-0.0235011	0.151428	0.868368	0.795313	0.189185	0.174382	0.1904	3.66344e-05	0.159238	0.0859485	0.9782	0.000556147	3	deactivated in tumors	Oncogene	TRUE
E2F4	STK11	STK11 p.G279fs	6	7032	1.18252	0.0105064	1.17201	0.781081	0.686551	1.70692	1.5005	1.7071	3.66539e-05	1.15665	0.000628671	0.000173397	0.00171169	2	activated in tumors	TSG	TRUE
GABPA	NR4A2	NR4A2 missense	68	7068	0.390089	-0.00255316	0.392642	0.718575	0.783364	0.501599	0.546417	0.501225	3.70881e-05	0.393723	0.423378	0.0504286	0.0013908	3	activated in tumors	TSG	TRUE
NRF1	KRAS	KRAS interface ZDHHC17	400	6615	-0.17922	0.00295732	-0.182177	0.820401	0.782705	-0.232103	0.222059	0.232754	3.71868e-05	-0.167273	0.0202335	9.40737e-07	0.00155881	5	activated in tumors	Oncogene	TRUE
FOS	TP53	TP53 hotspot S215	132	4377	0.182124	-0.0542338	0.236358	0.680252	0.659863	0.357866	0.347456	0.358193	3.73132e-05	0.240723	0.0319568	0.0263694	0.00251042	2	activated in tumors	TSG	TRUE
ETS1	HRAS	HRAS 3D hotspot 5-164-1bkd	53	7081	0.454813	-4.33748e-05	0.454857	0.589139	0.803825	0.566823	0.77207	0.565865	3.77347e-05	0.456016	0.59294	0.00363465	0.00045381	4	activated in tumors	Oncogene	TRUE
RUNX1	BRAF	BRAF interaction increasing MAP2K1 // BRAF p.V600E	457	6510	0.129033	-0.0235011	0.152534	0.873074	0.795313	0.190516	0.174709	0.191791	3.77686e-05	0.16113	0.082619	0.997415	0.000569543	3	deactivated in tumors	Oncogene	TRUE
STAT2	MAP3K4	MAP3K4 p.K158fs	8	6954	1.21073	-0.000517717	1.21125	1.08006	0.826202	1.46552	1.12146	1.46604	3.78269e-05	1.20494	0.148615	0.00322227	0.0255331	4	activated in tumors	Oncogene	TRUE
MYC	PBRM1	PBRM1 truncating	183	6866	0.23191	0.00195102	0.229959	0.60827	0.737899	0.312938	0.378054	0.31164	3.79644e-05	0.227368	0.0313307	0.00833645	0.004271	3	activated in tumors	TSG	TRUE
BACH1	HRAS	HRAS p.Q61R	15	7081	-0.763533	0.0261146	-0.789648	0.693486	0.753897	-1.04758	1.13866	1.04742	3.80713e-05	-0.803271	0.031313	0.678836	0.00045381	4	no differential activity	Oncogene	TRUE
MEF2A	STK11	STK11 truncating	61	7032	-0.450895	0.000448103	-0.451344	0.93275	0.834405	-0.540346	0.483885	0.540916	3.81742e-05	-0.442416	0.797191	0.000280465	0.00171169	5	no differential activity	TSG	TRUE
HIF1A	PIK3R1	PIK3R1 truncating	88	6916	0.32223	0.0110358	0.311195	0.877475	0.699103	0.443551	0.354648	0.445134	3.82368e-05	0.310393	0.926647	0.668008	0.0329792	3	activated in tumors	TSG	TRUE
ZEB1	STK11	STK11 p.G279fs	6	7032	-1.06592	-0.00124807	-1.06467	0.692602	0.626687	-1.69875	1.5372	1.69889	3.83619e-05	-1.05464	0.767449	0.0470372	0.00171169	5	no differential activity	TSG	TRUE
BACH1	HRAS	HRAS interface RAPGEF2 // HRAS 3D hotspot 5-162-3cf6	31	7081	-0.527863	0.0261146	-0.553977	0.791319	0.753897	-0.734661	0.700068	0.734818	3.85058e-05	-0.559114	0.0415992	0.785797	0.00045381	4	no differential activity	Oncogene	TRUE
PBX1	HRAS	HRAS 3D hotspot 1-166-4nym	54	7081	-0.362198	0.00957285	-0.371771	0.629381	0.660286	-0.563236	0.590693	0.563045	3.85646e-05	-0.37104	0.0124642	0.00708369	0.00045381	4	deactivated in tumors	Oncogene	TRUE
FOXO3	ERBB2	ERBB2 missense	154	6995	0.292721	0.00590941	0.286811	0.876423	0.853941	0.335676	0.327252	0.335868	3.88513e-05	0.286697	0.992828	0.871881	0.0390047	3	deactivated in tumors	Oncogene	TRUE
RXRA	CTNNB1	CTNNB1 interface BTRC	80	6783	-0.302282	0.00197157	-0.304253	0.574161	0.658403	-0.462747	0.52991	0.462108	3.90528e-05	-0.30438	0.529045	0.289721	0.002869	1	deactivated in tumors	Oncogene	TRUE
GATA3	TP53	TP53 3D hotspot 97-291-4a63	494	4377	-0.0646572	0.0722017	-0.136859	0.617267	0.709111	-0.195412	0.221717	0.193001	3.91813e-05	-0.13647	0.0162108	3.99051e-06	0.00262401	4	deactivated in tumors	TSG	TRUE
RELA	HRAS	HRAS 3D hotspot 5-163-4lwz // HRAS p.61	27	7081	-0.555644	0.00642155	-0.562065	0.685907	0.707711	-0.79429	0.819448	0.794202	3.92226e-05	-0.561246	0.419395	0.00153633	0.00045724	3	no differential activity	Oncogene	TRUE
STAT3	GATA3	GATA3 truncating	107	6972	-0.257957	0.0133718	-0.271329	0.771504	0.72132	-0.375751	0.351688	0.376156	3.93215e-05	-0.290607	0.400626	0.00724013	0.00129324	3	deactivated in tumors	TSG	TRUE
MYCN	MEN1	MEN1 truncating	36	7065	0.524583	0.0119463	0.512637	0.714652	0.759905	0.674799	0.717324	0.674607	3.95969e-05	0.521658	0.0709049	0.000693633	0.00439171	4	activated in tumors	TSG	TRUE
E2F1	BRCA2	BRCA2 missense	255	6813	0.17803	0.01124	0.16679	0.67197	0.634008	0.262492	0.248211	0.263073	3.99294e-05	0.166607	0.0301486	0.000284723	0.0106424	2	activated in tumors	TSG	TRUE
MYB	TP53	TP53 DNA/RNA aff. disabling	467	4377	-0.138929	0.0109398	-0.149869	0.781155	0.745222	-0.200157	0.191855	0.201106	3.99371e-05	-0.149897	0.843256	0.710942	0.00266242	4	deactivated in tumors	TSG	TRUE
GATA2	BRAF	BRAF hotspot T599	494	6510	0.157696	0.00299379	0.154702	0.707189	0.782414	0.199011	0.218757	0.197724	3.99476e-05	0.150166	0.614913	0.0212058	0.000598412	5	activated in tumors	Oncogene	TRUE
NR1I2	JAK2	JAK2 truncating	31	7014	0.563125	-0.00240976	0.565535	0.775022	0.765535	0.738706	0.729702	0.738745	4.01051e-05	0.566595	0.957705	0.74485	0.0105276	4	deactivated in tumors	Oncogene	TRUE
CREB1	PTEN	PTEN p.R130G	27	6484	-0.692095	0.0106262	-0.702721	0.853033	0.85924	-0.817864	0.823791	0.81784	4.04024e-05	-0.681845	0.0014953	0.425783	0.00847228	2	activated in tumors	TSG	TRUE
E2F7	NCOR2	NCOR2 missense	99	6980	0.268075	0.00957595	0.258499	0.490999	0.626824	0.413504	0.526477	0.412396	4.04405e-05	0.259845	0.012207	0.0022254	0.00485286	3	activated in tumors	Oncogene	TRUE
MYB	CTNNB1	CTNNB1 p.S37C	13	6783	0.862543	-0.0120939	0.874637	1.11631	0.765796	1.14099	0.783509	1.14213	4.05109e-05	0.874183	0.200478	0.654472	0.00293033	4	deactivated in tumors	Oncogene	TRUE
E2F4	BRCA2	BRCA2 missense	255	6813	0.186234	0.00742579	0.178808	0.732204	0.686785	0.259719	0.244205	0.260356	4.05426e-05	0.180255	0.00096996	6.41284e-05	0.0106424	2	activated in tumors	TSG	TRUE
FOSL2	TP53	TP53 p.R273C	105	4377	-0.1986	0.0667705	-0.265371	0.572351	0.659173	-0.403736	0.463651	0.402581	4.07375e-05	-0.267312	0.895064	0.112071	0.00270343	3	no differential activity	TSG	TRUE
E2F4	CTTN	CTTN missense	54	7099	0.396971	0.0111047	0.385866	0.802909	0.688822	0.559439	0.480585	0.560182	4.08706e-05	0.38628	0.000980547	0.000104666	0.00613059	2	activated in tumors	Oncogene	TRUE
ELK1	CIC	CIC truncating	86	6893	0.319146	0.000261347	0.318885	0.679633	0.715865	0.445722	0.469201	0.445454	4.10686e-05	0.318545	0.597288	0.061151	0.00462022	3	activated in tumors	TSG	TRUE
FOXI1	BRAF	BRAF hotspot T599	494	6510	0.177729	0.0191465	0.158582	0.706514	0.764593	0.208483	0.224457	0.207407	4.12466e-05	0.146638	0.0150473	0.0924621	0.000613805	5	deactivated in tumors	Oncogene	TRUE
GABPA	RET	RET missense	141	7005	0.272942	-0.00437874	0.277321	0.796864	0.781979	0.354507	0.348016	0.35464	4.17631e-05	0.272972	0.382399	0.0772835	0.0156612	4	activated in tumors	Oncogene	TRUE
FOXM1	FN1	FN1 missense	223	6911	0.166505	0.00692235	0.159582	0.505372	0.579702	0.276317	0.315772	0.275283	4.21441e-05	0.161373	0.0120724	7.00289e-05	0.00421441	5	activated in tumors	TSG	TRUE
FOXM1	MEN1	MEN1 truncating	36	7065	0.395354	0.00925029	0.386104	0.545955	0.577922	0.668268	0.707209	0.66809	4.2223e-05	0.395025	0.0130095	1.33156e-05	0.00439171	3	activated in tumors	TSG	TRUE
ETS1	KEAP1	KEAP1 truncating	35	6941	0.555345	-0.00786647	0.563212	0.68369	0.798639	0.705674	0.823783	0.705214	4.24236e-05	0.554145	0.767771	0.00664405	0.000923739	5	activated in tumors	Oncogene	TRUE
E2F4	TP53	TP53 p.R249S	23	4377	0.513161	-0.0647709	0.577932	0.576966	0.668715	0.864795	1.00167	0.864242	4.24444e-05	0.570801	0.0398687	3.58691e-07	0.00280396	2	activated in tumors	TSG	TRUE
NRF1	AKT1	AKT1uniprot = gain // AKT1 p.E17K // AKT1 p.17	36	7094	-0.563198	-0.004935	-0.558263	0.798185	0.786247	-0.709981	0.699415	0.710034	4.29739e-05	-0.537049	0.00416016	5.67509e-07	0.0128922	5	activated in tumors	Oncogene	TRUE
NR1I2	CTNNB1	CTNNB1 hotspot S37	185	6783	0.224912	-0.00791801	0.23283	0.727139	0.765932	0.30438	0.3202	0.303983	4.32376e-05	0.23336	0.72694	0.886978	0.00308018	2	deactivated in tumors	Oncogene	TRUE
HNF1A	NFE2L2	NFE2L2 p.79	20	6974	0.461785	-0.00731328	0.469099	0.369072	0.504711	0.930029	1.27102	0.92944	4.32503e-05	0.462342	0.0807166	0.409746	0.0127798	2	deactivated in tumors	Oncogene	TRUE
ZEB1	BRAF	BRAF interaction increasing MAP2K1 // BRAF p.V600E	457	6510	0.11543	-0.00872728	0.124158	0.706329	0.620591	0.198156	0.175779	0.200063	4.34768e-05	0.12509	0.421303	0.0538376	0.000642766	4	no differential activity	Oncogene	TRUE
E2F4	FLT3	FLT3 missense	146	6970	0.245333	0.0085727	0.236761	0.631078	0.691505	0.342969	0.375169	0.342385	4.35692e-05	0.235869	0.000996856	0.00013551	0.0326769	4	activated in tumors	Oncogene	TRUE
ESR1	EP300	EP300 p.D1399N	12	6892	-0.84579	0.026768	-0.872558	0.806728	0.742805	-1.17451	1.0816	1.17468	4.36446e-05	-0.877712	0.349632	0.0245747	0.00439172	3	deactivated in tumors	TSG	TRUE
SMAD4	CDH1	CDH1 truncating	122	6863	0.288584	0.0035491	0.285034	0.926389	0.742828	0.381882	0.307683	0.383715	4.37538e-05	0.28005	7.97445e-05	0.142803	0.00156264	2	deactivated in tumors	TSG	TRUE
GABPA	TP53	TP53 interaction increasing VRK1 // TP53 p.R175H	108	4377	0.245641	-0.0556262	0.301267	0.776539	0.759521	0.396439	0.387961	0.396653	4.38194e-05	0.302574	0.0981425	0.0127696	0.00287795	4	activated in tumors	TSG	TRUE
E2F1	TP53	TP53 interface BCL2	434	4377	0.0812505	-0.0480138	0.129264	0.636267	0.62954	0.205133	0.203161	0.205331	4.39586e-05	0.129529	0.0395661	2.48895e-06	0.00287795	2	activated in tumors	TSG	TRUE
MYCN	EGFR	EGFR 3D hotspot 715-965-3p08	61	6797	-0.391568	0.0182697	-0.409838	0.981962	0.75503	-0.541175	0.417366	0.54281	4.40196e-05	-0.398194	0.0764801	0.00242078	0.0215205	2	activated in tumors	Oncogene	TRUE
MYC	CTNNB1	CTNNB1 interface BTRC	80	6783	0.332582	-0.00276975	0.335352	0.642007	0.733945	0.457535	0.522349	0.456916	4.41758e-05	0.336728	0.0227252	0.0143543	0.00310004	2	activated in tumors	Oncogene	TRUE
YY1	NR4A2	NR4A2 p.N231fs // NR4A2 p.N294fs	5	7068	1.45392	0.00491454	1.449	0.70231	0.79552	1.82157	2.0632	1.82145	4.44475e-05	1.45344	0.959873	0.00164833	0.00156873	4	activated in tumors	TSG	TRUE
PAX6	HRAS	HRAS hotspot Y64	30	7081	-0.519306	0.0108213	-0.530128	0.6376	0.721289	-0.735301	0.831442	0.734973	4.4595e-05	-0.53879	0.0166902	0.275488	0.000515055	4	deactivated in tumors	Oncogene	TRUE
GABPA	TP53	TP53 interface TP53	596	4377	0.0870943	-0.0556262	0.142721	0.842975	0.759521	0.185355	0.169306	0.187909	4.50051e-05	0.137362	0.0880491	0.00393682	0.00292572	4	activated in tumors	TSG	TRUE
PAX6	EP300	EP300 missense	213	6892	-0.196733	0.0151873	-0.21192	0.789015	0.71747	-0.294453	0.268589	0.295372	4.50433e-05	-0.204662	0.0225675	0.254317	0.00439172	4	deactivated in tumors	TSG	TRUE
E2F1	TP53	TP53 3D hotspot 95-290-1gzh	333	4377	0.0993299	-0.0480138	0.147344	0.615648	0.62954	0.234411	0.239331	0.23405	4.50891e-05	0.145775	0.0412952	7.07504e-07	0.00292572	2	activated in tumors	TSG	TRUE
E2F4	SMARCA4	SMARCA4 truncating	30	6895	0.5203	0.00414336	0.516157	0.69104	0.688862	0.74928	0.746928	0.74929	4.54782e-05	0.513382	0.000343445	8.964e-05	0.00149225	2	activated in tumors	TSG	TRUE
ELK1	KEAP1	KEAP1 interface KEAP1	36	6941	0.477373	-0.00557455	0.482947	0.853763	0.710619	0.67886	0.565669	0.679615	4.58936e-05	0.484913	0.183498	0.165328	0.000968067	4	activated in tumors	Oncogene	TRUE
HSF1	ATM	ATM missense	359	6712	0.159272	0.00453173	0.15474	0.697554	0.693051	0.2232	0.221833	0.223274	4.60309e-05	0.15352	0.801602	0.222622	0.00498668	3	activated in tumors	TSG	TRUE
STAT1	APC	APC truncating	448	6511	-0.141858	0.0217051	-0.163563	0.763447	0.795126	-0.206225	0.214243	0.205707	4.60799e-05	-0.159393	0.942625	0.000593838	0.0163984	2	deactivated in tumors	TSG	TRUE
JUND	FGFR3	FGFR3 interface FGF1 // FGFR3 3D hotspot 150-362-1ry7	23	7059	-0.521745	0.0055655	-0.527311	0.387243	0.602442	-0.876088	1.36171	0.875288	4.61859e-05	-0.512751	0.0297115	0.0795074	0.00239812	4	deactivated in tumors	Oncogene	TRUE
SMAD4	VHL	VHL interface TCEB2	41	6853	0.470813	0.0080943	0.462719	0.702426	0.755001	0.61311	0.658744	0.612871	4.63561e-05	0.481482	0.000121854	0.0239937	0.0419012	4	deactivated in tumors	TSG	TRUE
FOSL2	MAP3K1	MAP3K1 truncating	87	6974	0.287668	-0.00606753	0.293736	0.639187	0.684417	0.429512	0.459547	0.429177	4.65802e-05	0.302012	0.0488185	0.0775595	0.00299772	3	no differential activity	TSG	TRUE
STAT2	B2M	B2M missense	42	7073	0.526642	-0.00220043	0.528842	0.986934	0.830301	0.636171	0.535843	0.636928	4.68782e-05	0.523838	0.226443	0.00807769	0.00761771	4	activated in tumors	TSG	TRUE
NR3C1	CTNNB1	CTNNB1 hotspot T41	147	6783	-0.250283	0.0228074	-0.273091	0.75536	0.797948	-0.342617	0.361537	0.342241	4.69712e-05	-0.270708	0.167082	0.41079	0.00324774	2	deactivated in tumors	Oncogene	TRUE
PPARG	TRIO	TRIO missense	222	6905	-0.186972	0.0196398	-0.206611	0.82743	0.74586	-0.276025	0.249702	0.277011	4.70171e-05	-0.208203	0.259887	0.22457	0.00440785	4	deactivated in tumors	Oncogene	TRUE
RUNX1	BRAF	BRAF p.600	460	6510	0.126678	-0.0235011	0.150179	0.872202	0.795313	0.187582	0.172184	0.188831	4.73811e-05	0.158555	0.0865114	0.982262	0.000695938	3	deactivated in tumors	Oncogene	TRUE
SPI1	HRAS	HRAS interface RAPGEF2 // HRAS 3D hotspot 5-162-3cf6	31	7081	-0.561719	0.00592544	-0.567644	0.67284	0.771262	-0.736365	0.843655	0.735994	4.74223e-05	-0.56467	0.0210562	0.0394906	0.000542685	4	activated in tumors	Oncogene	TRUE
ATF2	MET	MET missense	157	6986	0.272445	0.00213781	0.270308	0.842517	0.816287	0.330907	0.320833	0.331143	4.77216e-05	0.268365	0.35344	0.685473	0.0273292	3	deactivated in tumors	Oncogene	TRUE
SMAD3	NR4A2	NR4A2 p.N231fs // NR4A2 p.N294fs	5	7068	-1.5122	0.0226373	-1.53484	0.465455	0.833174	-1.84252	3.2975	1.84216	4.80487e-05	-1.51312	0.000166273	0.000137243	0.00160162	3	deactivated in tumors	TSG	TRUE
TCF4	KEAP1	KEAP1 missense	188	6941	-0.21472	0.0328766	-0.247597	0.809765	0.785395	-0.314991	0.305764	0.315251	4.8163e-05	-0.236695	0.000836573	0.663791	0.000985152	4	deactivated in tumors	Oncogene	TRUE
PPARD	TP53	TP53 interface TP53	596	4377	-0.0764363	0.0449838	-0.12142	0.688873	0.684973	-0.177142	0.176259	0.177263	4.81853e-05	-0.121838	0.103172	0.0104097	0.0031128	4	deactivated in tumors	TSG	TRUE
ETS1	HRAS	HRAS missense	78	7081	0.374496	-4.33748e-05	0.374539	0.696685	0.803825	0.466571	0.537602	0.465946	4.82259e-05	0.371516	0.579527	0.00425256	0.000546864	4	activated in tumors	Oncogene	TRUE
E2F6	CARD11	CARD11 truncating	35	6914	0.554775	0.00550919	0.549266	0.670924	0.807074	0.68108	0.818671	0.680565	4.84669e-05	0.555909	0.30878	0.179493	0.00148705	4	activated in tumors	Oncogene	TRUE
E2F6	SMARCA4	SMARCA4 missense	230	6895	0.225282	0.00385974	0.221422	0.785302	0.808011	0.274278	0.281958	0.274033	4.85634e-05	0.220151	0.399797	0.188332	0.00149975	2	activated in tumors	TSG	TRUE
E2F7	RB1	RB1 missense	164	6859	0.194241	0.00188171	0.192359	0.618598	0.622959	0.308833	0.31096	0.308783	4.86984e-05	0.200108	0.0137516	0.00210237	0.00401762	2	activated in tumors	TSG	TRUE
E2F1	MEN1	MEN1 truncating	36	7065	0.437107	0.0142337	0.422873	0.645699	0.635916	0.664932	0.654907	0.664983	4.87968e-05	0.431413	0.0212568	0.000196299	0.00439171	2	activated in tumors	TSG	TRUE
HIF1A	PTEN	PTEN truncating	325	6484	0.163697	0.00308346	0.160614	0.798139	0.690557	0.230749	0.201235	0.232586	4.89336e-05	0.161404	0.506641	0.83492	0.0096199	2	activated in tumors	TSG	TRUE
NRF1	TP53	TP53 inframe indel	64	4377	0.259606	-0.104357	0.363964	0.734944	0.739101	0.49248	0.495227	0.492441	4.91846e-05	0.376597	0.00502991	5.43634e-09	0.00316335	6	activated in tumors	TSG	TRUE
HIF1A	MSH6	MSH6 p.T1085fs // MSH6 p.T783fs // MSH6 p.T955fs	26	7000	0.56753	0.00956188	0.557968	0.822429	0.701195	0.795207	0.678439	0.795739	4.92426e-05	0.560795	0.589325	0.815361	0.000738639	3	activated in tumors	TSG	TRUE
GABPA	TP53	TP53 interaction ZNF385A loss	109	4377	0.242424	-0.0556262	0.29805	0.773665	0.759521	0.39224	0.385244	0.392418	4.98303e-05	0.298977	0.0986948	0.0130611	0.00317922	4	activated in tumors	TSG	TRUE
PPARD	TP53	TP53 p.157	37	4377	-0.422789	0.0449838	-0.467773	0.721806	0.684973	-0.6826	0.648059	0.682907	4.98669e-05	-0.459383	0.169019	0.00326387	0.00317922	4	deactivated in tumors	TSG	TRUE
E2F1	MAP3K1	MAP3K1 truncating	87	6974	-0.284057	0.0196627	-0.30372	0.668159	0.634515	-0.478347	0.454562	0.478664	4.9962e-05	-0.279142	0.0373836	0.00158727	0.00299772	2	activated in tumors	TSG	TRUE
ATF4	PIK3CA	PIK3CA p.542	145	6014	-0.267099	0.0109602	-0.278059	0.865597	0.815221	-0.340577	0.321234	0.341084	5.00273e-05	-0.278957	0.0818637	0.553548	0.00237821	4	activated in tumors	Oncogene	TRUE
VDR	CSF1R	CSF1R missense	88	7061	-0.314175	0.00644088	-0.320616	0.762259	0.723271	-0.442988	0.420614	0.443287	5.04992e-05	-0.31499	0.513446	0.0188299	0.0104903	4	deactivated in tumors	Oncogene	TRUE
MAX	TSC1	TSC1 truncating	27	7062	0.618503	0.00107359	0.61743	0.669862	0.772381	0.799749	0.921727	0.799385	5.08903e-05	0.603258	0.335028	0.000220997	0.00509518	3	activated in tumors	TSG	TRUE
EGR1	TP53	TP53 missense	1991	4377	-0.0304168	0.0655956	-0.0960124	0.82008	0.851677	-0.114039	0.117077	0.112733	5.12169e-05	-0.0923218	0.0170589	0.0403178	0.0032511	1	deactivated in tumors	TSG	TRUE
ETS1	HRAS	HRAS interface NF1	70	7081	0.392628	-4.33748e-05	0.392672	0.642998	0.803825	0.489355	0.610689	0.488504	5.13173e-05	0.390368	0.623243	0.00338407	0.000576676	4	activated in tumors	Oncogene	TRUE
GATA2	KRAS	KRAS missense	543	6615	0.141451	0.00241529	0.139036	0.825978	0.774487	0.178593	0.168329	0.17952	5.1727e-05	0.141506	0.192077	0.0215509	0.00211125	5	activated in tumors	Oncogene	TRUE
ESR1	TP53	TP53 p.I195T	18	4377	-0.549647	0.0908228	-0.64047	1.03298	0.707762	-0.90295	0.620022	0.904923	5.17599e-05	-0.676878	0.0589189	2.36918e-09	0.00327134	3	deactivated in tumors	TSG	TRUE
BACH1	HRAS	HRAS 3D hotspot 1-166-1nvx	33	7081	-0.502837	0.0261146	-0.528951	0.809197	0.753897	-0.701383	0.653675	0.701623	5.18377e-05	-0.532906	0.042179	0.760787	0.000577324	4	no differential activity	Oncogene	TRUE
E2F1	ERCC2	ERCC2 missense	83	7073	0.297739	0.0142421	0.283497	0.596748	0.636205	0.445914	0.47507	0.445607	5.1996e-05	0.284024	0.0282295	0.000389755	0.0012999	2	activated in tumors	Oncogene	TRUE
GATA3	BRAF	BRAF missense	624	6510	0.139326	0.0162078	0.123118	0.671542	0.703904	0.175598	0.183336	0.174907	5.20881e-05	0.119321	0.230005	0.0382128	0.00076014	4	deactivated in tumors	Oncogene	TRUE
MYC	NCOR2	NCOR2 missense	99	6980	0.30305	0.00296836	0.300081	0.758677	0.734084	0.408591	0.395532	0.408783	5.21963e-05	0.300921	0.0400854	0.00494359	0.0051206	3	activated in tumors	Oncogene	TRUE
PPARD	FBXW7	FBXW7 missense	271	6806	-0.155662	0.00467512	-0.160337	0.670796	0.689674	-0.232722	0.239025	0.232482	5.22033e-05	-0.17308	0.031279	2.50861e-05	0.0134237	5	deactivated in tumors	TSG	TRUE
ZEB1	BRAF	BRAF hotspot S602	483	6510	0.110587	-0.00872728	0.119315	0.704939	0.620591	0.190364	0.169255	0.19226	5.25527e-05	0.120521	0.416042	0.0632899	0.000762003	4	no differential activity	Oncogene	TRUE
HSF1	KEAP1	KEAP1 missense	188	6941	0.217569	0.0061417	0.211427	0.718899	0.693693	0.30449	0.294099	0.304785	5.26404e-05	0.208172	0.683907	0.393362	0.00099128	4	activated in tumors	Oncogene	TRUE
JUN	KEAP1	KEAP1 missense	188	6941	-0.205455	0.016845	-0.2223	0.723988	0.716319	-0.31025	0.30705	0.310337	5.27028e-05	-0.21474	0.428972	0.0408529	0.00099128	2	deactivated in tumors	Oncogene	TRUE
MEF2A	KEAP1	KEAP1 truncating	35	6941	-0.572841	0.0055005	-0.578341	0.817319	0.832361	-0.694881	0.707608	0.69482	5.28682e-05	-0.570481	0.581025	0.00105182	0.00099128	5	no differential activity	Oncogene	TRUE
FOSL2	TP53	TP53 interface TP53BP1 // TP53 3D hotspot 95-289-1kzy // TP53 3D hotspot 95-292-1gzh	353	4377	-0.0818691	0.0667705	-0.14864	0.631458	0.659173	-0.226188	0.235391	0.225494	5.31914e-05	-0.147312	0.734965	0.152737	0.00334732	3	no differential activity	TSG	TRUE
PPARA	PIK3CA	PIK3CA p.E542K	135	6014	-0.282512	0.000361781	-0.282874	1.00411	0.773072	-0.363199	0.281716	0.365909	5.3595e-05	-0.27433	0.0112688	0.222111	0.00252527	4	deactivated in tumors	Oncogene	TRUE
PAX6	CDH1	CDH1 truncating	122	6863	0.268558	0.00130847	0.267249	0.832069	0.717219	0.371507	0.321186	0.372619	5.36935e-05	0.266965	0.010414	0.591033	0.00183046	4	deactivated in tumors	TSG	TRUE
E2F1	RB1	RB1 missense	164	6859	0.194526	0.00188835	0.192638	0.662614	0.628853	0.30594	0.290724	0.306332	5.37069e-05	0.201064	0.0119942	8.53269e-05	0.00402801	1	activated in tumors	TSG	TRUE
IRF1	HRAS	HRAS 3D hotspot 5-163-4lwz // HRAS p.61	27	7081	-0.640173	0.012042	-0.652215	0.691834	0.837509	-0.779208	0.942733	0.778755	5.40338e-05	-0.651998	0.61373	0.0112398	0.000596456	4	no differential activity	Oncogene	TRUE
MYC	CARD11	CARD11 truncating	35	6914	0.489192	0.00201352	0.487178	0.594994	0.731408	0.666634	0.818795	0.666082	5.43472e-05	0.500089	0.0264013	0.0055289	0.00155603	3	activated in tumors	Oncogene	TRUE
FOXM1	PIK3CA	PIK3CA interaction increasing IRS1	426	6014	-0.104239	0.0243339	-0.128573	0.624254	0.567746	-0.224917	0.205963	0.226463	5.45683e-05	-0.116415	0.0135855	0.00407197	0.00254857	3	activated in tumors	Oncogene	TRUE
GATA2	BRAF	BRAF hotspot S602	483	6510	0.156395	0.00299379	0.153401	0.697733	0.782414	0.19746	0.219857	0.196062	5.48022e-05	0.149007	0.683364	0.0262024	0.000789559	5	activated in tumors	Oncogene	TRUE
ETS1	CARD11	CARD11 p.R555fs	20	6914	0.708788	-0.00367935	0.712468	0.563445	0.799161	0.892135	1.26448	0.89152	5.53255e-05	0.722121	0.764587	0.00659065	0.00155603	4	activated in tumors	Oncogene	TRUE
E2F7	TP53	TP53 3D hotspot 96-288-2mej	501	4377	0.0733993	-0.0438711	0.11727	0.604818	0.63579	0.185354	0.193894	0.184448	5.59953e-05	0.120198	0.00548409	0.000254061	0.00350865	3	activated in tumors	TSG	TRUE
CREB1	CIC	CIC truncating	86	6893	0.383501	0.00627054	0.377231	0.715877	0.862544	0.438178	0.52695	0.437347	5.60509e-05	0.376432	0.025349	0.106195	0.00540491	3	activated in tumors	TSG	TRUE
E2F6	B2M	B2M truncating	55	7073	0.446846	0.0095716	0.437275	0.711658	0.807639	0.541883	0.614445	0.541424	5.67968e-05	0.440095	0.411434	0.120328	0.00791098	3	activated in tumors	TSG	TRUE
CEBPB	TP53	TP53 3D hotspot 96-290-2mej	433	4377	-0.102973	0.0526016	-0.155575	0.804031	0.779406	-0.199034	0.193493	0.199607	5.69085e-05	-0.158825	0.0879385	0.874882	0.00353869	3	deactivated in tumors	TSG	TRUE
E2F4	TP53	TP53 hotspot S269	348	4377	0.0860876	-0.0647709	0.150858	0.638186	0.668715	0.226338	0.236386	0.225594	5.69595e-05	0.149299	0.0891001	3.50964e-05	0.00353869	2	activated in tumors	TSG	TRUE
ETS1	CTNNB1	CTNNB1 interface BTRC	80	6783	0.359041	-0.00713745	0.366179	0.729976	0.804624	0.455557	0.501631	0.455093	5.69789e-05	0.36404	0.660204	0.0262879	0.0038826	4	activated in tumors	Oncogene	TRUE
PPARG	U2AF1	U2AF1 p.34	27	7116	-0.562696	0.0149044	-0.5776	0.754485	0.749951	-0.770167	0.765555	0.770184	5.71776e-05	-0.582475	0.318156	0.187819	0.00643248	5	deactivated in tumors	Oncogene	TRUE
ZEB1	BRAF	BRAF activitygain	467	6510	0.112291	-0.00872728	0.121018	0.709586	0.620591	0.193033	0.170547	0.195004	5.72186e-05	0.121888	0.434946	0.0582893	0.000819155	4	no differential activity	Oncogene	TRUE
TP53	ARID1A	ARID1A truncating	381	6602	0.155465	-0.00211462	0.15758	0.819949	0.73344	0.213404	0.192182	0.21485	5.7465e-05	0.156872	0.656126	0.153359	0.00499151	3	deactivated in tumors	TSG	TRUE
ATF4	PIK3CA	PIK3CA p.E542K	135	6014	-0.27471	0.0109602	-0.285671	0.889659	0.815221	-0.349694	0.321101	0.350421	5.77304e-05	-0.286586	0.0727488	0.546608	0.00267281	4	activated in tumors	Oncogene	TRUE
PAX6	ATM	ATM missense	359	6712	-0.145714	0.0178057	-0.163519	0.713435	0.720575	-0.227042	0.2292	0.226929	5.7992e-05	-0.157317	0.0401191	0.223821	0.00565422	5	deactivated in tumors	TSG	TRUE
ATF4	AJUBA	AJUBA truncating	32	7100	0.5847	-0.0220534	0.606753	0.734065	0.826957	0.734057	0.826566	0.733718	5.83652e-05	0.589155	0.0681901	0.015016	0.00437739	5	activated in tumors	TSG	TRUE
CEBPB	TP53	TP53 interface BCL2L1	418	4377	-0.105573	0.0526016	-0.158175	0.805654	0.779406	-0.202341	0.196331	0.202943	5.84519e-05	-0.161144	0.106913	0.89009	0.00361602	3	deactivated in tumors	TSG	TRUE
CEBPA	BRAF	BRAF p.600	460	6510	0.127153	-0.00148932	0.128643	0.655968	0.686414	0.187951	0.196111	0.187413	5.85434e-05	0.133899	0.137266	0.406761	0.00083285	4	deactivated in tumors	Oncogene	TRUE
E2F1	AXIN1	AXIN1 missense	67	7061	0.327199	0.0137176	0.313482	0.684094	0.635384	0.49301	0.458244	0.493374	5.92647e-05	0.313587	0.0294301	0.000505601	0.00333364	2	activated in tumors	TSG	TRUE
NRF1	TP53	TP53 hotspot S183	130	4377	0.158312	-0.104357	0.262669	0.800537	0.739101	0.354512	0.328116	0.35539	5.93501e-05	0.264038	0.00728475	1.76501e-08	0.00365609	6	activated in tumors	TSG	TRUE
E2F7	PDGFRA	PDGFRA missense	204	6938	0.187808	0.00962372	0.178185	0.606621	0.626128	0.28483	0.293733	0.284582	5.94024e-05	0.178595	0.025034	0.00392173	0.00509986	4	activated in tumors	Oncogene	TRUE
FOSL2	TP53	TP53 hotspot T284	209	4377	-0.12157	0.0667705	-0.18834	0.736709	0.659173	-0.284121	0.255651	0.285722	5.96518e-05	-0.188811	0.62362	0.410254	0.00365924	3	no differential activity	TSG	TRUE
MAX	NCOR2	NCOR2 missense	99	6980	0.32529	0.00235556	0.322935	0.790855	0.773337	0.417454	0.408337	0.417586	5.97403e-05	0.314409	0.267238	0.000310221	0.0051206	3	activated in tumors	Oncogene	TRUE
ZEB1	BRAF	BRAF p.600	460	6510	0.112719	-0.00872728	0.121446	0.705655	0.620591	0.193834	0.172105	0.195695	5.97674e-05	0.122409	0.42434	0.0504863	0.000844949	4	no differential activity	Oncogene	TRUE
E2F4	AXIN2	AXIN2 p.G665fs	24	7041	0.552095	0.0105016	0.541594	0.546105	0.689425	0.78605	0.991739	0.785573	5.98146e-05	0.565368	0.000428052	8.09978e-05	0.00224305	2	activated in tumors	TSG	TRUE
MYC	EGFR	EGFR interface PDGFRA	36	6797	-0.490204	0.0146296	-0.504833	0.89468	0.729126	-0.691486	0.564261	0.692382	5.98229e-05	-0.490171	0.0645402	0.0148411	0.0243486	2	activated in tumors	Oncogene	TRUE
IRF1	NRAS	NRAS p.Q61R	82	6936	-0.359739	0.0193124	-0.379052	0.822674	0.839475	-0.451638	0.460756	0.451534	5.99503e-05	-0.374822	0.601498	0.017914	0.00155897	5	no differential activity	Oncogene	TRUE
GLI2	ARID1A	ARID1A p.G1465fs // ARID1A p.G1631fs // ARID1A p.G1848fs	27	6602	-0.592791	0.00389675	-0.596688	0.639072	0.746571	-0.799657	0.933678	0.799238	6.05032e-05	-0.577586	0.000960397	0.661754	0.00499151	5	deactivated in tumors	TSG	TRUE
E2F4	TP53	TP53 hotspot S215	132	4377	0.163952	-0.0647709	0.228723	0.694844	0.668715	0.341638	0.329172	0.342033	6.05341e-05	0.236777	0.0364576	2.5171e-07	0.00368338	2	activated in tumors	TSG	TRUE
GABPA	TP53	TP53 p.175	118	4377	0.228135	-0.0556262	0.283761	0.771339	0.759521	0.373452	0.367881	0.373605	6.05499e-05	0.284357	0.0978158	0.0123757	0.00368338	4	activated in tumors	TSG	TRUE
FOXO3	ERBB2	ERBB2 interface ITK	31	6995	0.624141	0.00590941	0.618232	0.926453	0.853941	0.723701	0.66731	0.723974	6.06608e-05	0.617249	0.861095	0.748476	0.0390047	3	deactivated in tumors	Oncogene	TRUE
FOSL2	TP53	TP53 p.193	56	4377	-0.288801	0.0667705	-0.355572	0.783665	0.659173	-0.538043	0.45373	0.539421	6.0854e-05	-0.35671	0.782176	0.189343	0.00368652	3	no differential activity	TSG	TRUE
FOSL2	NRAS	NRAS interface RASA1	204	6936	-0.193596	0.00329504	-0.196891	0.676596	0.685535	-0.287313	0.291002	0.287208	6.12903e-05	-0.195326	0.060124	0.151873	0.00155897	4	no differential activity	Oncogene	TRUE
PPARA	ERBB2	ERBB2 interface ITK	31	6995	-0.580107	-0.00528824	-0.574818	1.2273	0.788851	-0.726478	0.468361	0.728678	6.13138e-05	-0.571215	0.115086	0.295401	0.0390047	4	deactivated in tumors	Oncogene	TRUE
E2F7	PIK3CA	PIK3CA 3D hotspot 2-1061-4jps	543	6014	-0.0993455	0.0230803	-0.122426	0.673592	0.617154	-0.196821	0.181751	0.198372	6.18318e-05	-0.112465	0.0143196	0.0363077	0.00283802	3	activated in tumors	Oncogene	TRUE
ETS1	HRAS	HRAS interface RASGRF1 // HRAS 3D hotspot 1-166-1xd2 // HRAS 3D hotspot 1-166-4nyi	70	7081	0.38839	-4.33748e-05	0.388433	0.659891	0.803825	0.483993	0.588632	0.483231	6.18604e-05	0.386198	0.615974	0.00410221	0.00067356	4	activated in tumors	Oncogene	TRUE
NRF1	TP53	TP53 3D hotspot 95-290-1gzh	333	4377	0.066241	-0.104357	0.170598	0.812386	0.739101	0.229143	0.209997	0.230819	6.19287e-05	0.169205	0.00335646	8.11419e-10	0.00373612	6	activated in tumors	TSG	TRUE
EZH2	CTNNB1	CTNNB1 CSNK2A1 phosphorylation loss	113	6783	-0.304686	0.00717377	-0.31186	0.835941	0.814979	-0.382498	0.373064	0.38266	6.19377e-05	-0.309974	0.127842	0.769051	0.00416021	4	activated in tumors	Oncogene	TRUE
RELA	HRAS	HRAS p.Q61R	15	7081	-0.729907	0.00642155	-0.736329	0.429805	0.707711	-1.04109	1.71317	1.04044	6.20987e-05	-0.732478	0.445888	0.00133461	0.00067356	3	no differential activity	Oncogene	TRUE
ESR1	PIK3CA	PIK3CA p.542	145	6014	0.245553	-0.00138062	0.246933	0.875612	0.735214	0.334234	0.282012	0.335866	6.25609e-05	0.249219	0.670205	0.637921	0.00284694	2	deactivated in tumors	Oncogene	TRUE
PAX6	HRAS	HRAS 3D hotspot 5-163-2efd	47	7081	-0.407904	0.0108213	-0.418725	0.643605	0.721289	-0.580906	0.650593	0.580524	6.30955e-05	-0.42222	0.0169761	0.284652	0.000678472	4	deactivated in tumors	Oncogene	TRUE
CEBPA	BRAF	BRAF interaction increasing MAP2K1 // BRAF p.V600E	457	6510	0.127023	-0.00148932	0.128512	0.656746	0.686414	0.187743	0.19568	0.187222	6.34101e-05	0.133713	0.141468	0.406615	0.00089088	4	deactivated in tumors	Oncogene	TRUE
NR1I2	CTNNB1	CTNNB1 hotspot S29	117	6783	0.277294	-0.00791801	0.285212	0.726498	0.765932	0.372687	0.392585	0.372372	6.35e-05	0.285667	0.718904	0.914275	0.00417872	2	deactivated in tumors	Oncogene	TRUE
CEBPB	TP53	TP53 interface BCL2	434	4377	-0.101752	0.0526016	-0.154354	0.803883	0.779406	-0.197474	0.19201	0.19804	6.36618e-05	-0.157618	0.0888794	0.890164	0.00381051	3	deactivated in tumors	TSG	TRUE
CEBPB	TP53	TP53 Stability uniprot = D	218	4377	-0.162193	0.0526016	-0.214795	0.752217	0.779406	-0.276035	0.285549	0.275588	6.36838e-05	-0.21619	0.303794	0.569091	0.00381051	3	deactivated in tumors	TSG	TRUE
RELA	HRAS	HRAS interface RAPGEF2 // HRAS 3D hotspot 5-162-3cf6	31	7081	-0.500152	0.00642155	-0.506574	0.682731	0.707711	-0.715897	0.741981	0.715792	6.37426e-05	-0.509413	0.407996	0.00142186	0.000679571	3	no differential activity	Oncogene	TRUE
E2F4	MTOR	MTOR missense	244	6901	0.176486	0.0081939	0.168293	0.700766	0.689526	0.243933	0.240155	0.24407	6.37726e-05	0.179773	0.000649482	4.87237e-05	0.0269022	3	activated in tumors	Oncogene	TRUE
ETS1	KEAP1	KEAP1 interface KEAP1	36	6941	0.531559	-0.00786647	0.539425	0.943011	0.798639	0.674763	0.572024	0.67543	6.38192e-05	0.534413	0.77245	0.0080907	0.00115252	5	activated in tumors	Oncogene	TRUE
STAT1	NRAS	NRAS interface RASA1	204	6936	-0.209035	0.0218279	-0.230863	0.771294	0.799011	-0.289216	0.299318	0.288936	6.39728e-05	-0.226835	0.842761	0.000374064	0.00158439	4	deactivated in tumors	Oncogene	TRUE
EZH2	CTNNB1	CTNNB1 missense	354	6783	-0.174635	0.00717377	-0.181809	0.829932	0.814979	-0.22288	0.219065	0.223084	6.39908e-05	-0.178181	0.152588	0.858924	0.00417872	4	activated in tumors	Oncogene	TRUE
ATF1	RUNX1	RUNX1 CDK1 phosphorylation loss // RUNX1 CDK2 phosphorylation loss // RUNX1 MAPK1 phosphorylation loss // RUNX1 CDK6 phosphorylation loss // RUNX1 p.R293Q // RUNX1 p.293	5	7043	1.39601	0.0178746	1.37814	1.15492	0.763185	1.80511	1.19327	1.80577	6.41456e-05	1.36337	1.67165e-06	0.00477759	0.0271587	3	activated in tumors	TSG	TRUE
JUND	PIK3CA	PIK3CA p.378	6	6014	0.987014	-0.000452942	0.987467	0.988756	0.605385	1.63001	0.998696	1.63114	6.43835e-05	0.98955	0.163673	0.141172	0.00289816	3	deactivated in tumors	Oncogene	TRUE
TCF4	MSH6	MSH6 truncating	61	7000	-0.386252	0.030226	-0.416478	0.762106	0.785587	-0.530281	0.546483	0.530148	6.43972e-05	-0.403986	0.00122336	0.50168	0.000928806	5	deactivated in tumors	TSG	TRUE
GLI2	EP300	EP300 missense	213	6892	-0.204151	0.0137444	-0.217896	0.725648	0.753145	-0.289625	0.300277	0.289315	6.446e-05	-0.209484	0.00224336	0.756986	0.0057135	5	deactivated in tumors	TSG	TRUE
PBX1	MYCN	MYCN p.T43fs	7	7102	-0.999174	0.00844569	-1.00762	1.02918	0.659357	-1.52726	0.979052	1.52819	6.44839e-05	-0.997269	0.0172754	0.0081004	0.00715771	4	deactivated in tumors	Oncogene	TRUE
FOXM1	PIK3CA	PIK3CA p.1047	246	6014	-0.137173	0.0243339	-0.161507	0.721118	0.567746	-0.281116	0.223967	0.28447	6.47751e-05	-0.150766	0.0187305	0.104717	0.00289816	3	activated in tumors	Oncogene	TRUE
EGR1	MET	MET 3D hotspot 1071-1337-3p08	31	6986	0.612231	0.0181076	0.594124	0.956314	0.843666	0.703788	0.621264	0.704217	6.49143e-05	0.607163	0.00440349	0.154723	0.0273292	2	deactivated in tumors	Oncogene	TRUE
VDR	KEAP1	KEAP1 interface NFE2L1	11	6941	-0.857616	0.0154789	-0.873095	1.1046	0.718097	-1.21465	0.790417	1.21585	6.54068e-05	-0.866482	0.624716	0.0556503	0.00115252	4	deactivated in tumors	Oncogene	TRUE
ESR1	ABL1	ABL1 interface SRC	5	7040	-1.29892	0.0224673	-1.32139	1.20528	0.745211	-1.77236	1.09633	1.77317	6.55908e-05	-1.33202	0.337315	0.0357959	0.0304701	2	deactivated in tumors	Oncogene	TRUE
MYC	ATM	ATM missense	359	6712	0.1532	-0.000798527	0.153999	0.790905	0.729818	0.210084	0.194712	0.21101	6.56752e-05	0.158857	0.0235129	0.00258244	0.00582121	2	activated in tumors	TSG	TRUE
PPARG	TP53	TP53 3D hotspot 96-288-2mej	501	4377	-0.088134	0.0505728	-0.138707	0.766959	0.742127	-0.186256	0.180853	0.186904	6.6191e-05	-0.140298	0.193178	0.0378887	0.00392553	2	deactivated in tumors	TSG	TRUE
MYCN	TP53	TP53 3D hotspot 96-288-2mej	501	4377	0.0987198	-0.0430707	0.141791	0.751692	0.758548	0.187096	0.188628	0.186924	6.63553e-05	0.142449	0.450852	3.04014e-07	0.00392553	1	activated in tumors	TSG	TRUE
MYC	KEAP1	KEAP1 interface KEAP1	36	6941	0.48293	-0.00169667	0.484626	0.916384	0.73058	0.662393	0.528846	0.663345	6.65901e-05	0.487713	0.0247889	0.0101295	0.00115252	3	activated in tumors	Oncogene	TRUE
SOX2	NR4A2	NR4A2 missense	68	7068	-0.362779	-0.00161681	-0.361163	0.757412	0.733485	-0.492239	0.476838	0.492393	6.66094e-05	-0.356759	0.27773	0.0285098	0.00210346	5	deactivated in tumors	TSG	TRUE
FOXM1	TP53	TP53 p.248	155	4377	0.106793	-0.0786171	0.18541	0.517599	0.571004	0.325698	0.358212	0.32471	6.66532e-05	0.184858	0.00694214	1.51833e-11	0.00392553	2	activated in tumors	TSG	TRUE
FOXM1	TP53	TP53 p.273	215	4377	0.0775039	-0.0786171	0.156121	0.576543	0.571004	0.273291	0.270788	0.273415	6.68542e-05	0.158695	0.0393612	2.63973e-10	0.00392553	2	activated in tumors	TSG	TRUE
ESR1	CREBBP	CREBBP truncating	70	6820	-0.331179	0.0289611	-0.36014	0.865694	0.743779	-0.483345	0.416013	0.484203	6.68848e-05	-0.357229	0.490241	0.0283658	0.00949064	3	deactivated in tumors	TSG	TRUE
ELK1	STK11	STK11 missense	69	7032	0.341982	-0.000713005	0.342695	0.847354	0.714065	0.478986	0.40443	0.479922	6.69031e-05	0.34545	0.287973	0.0839751	0.00282806	3	activated in tumors	TSG	TRUE
GATA3	TP53	TP53 p.G108fs	6	4377	-1.04201	0.0722017	-1.11422	0.922074	0.709111	-1.57067	1.20838	1.57129	6.69504e-05	-1.15322	0.0263967	1.19617e-06	0.00392553	4	deactivated in tumors	TSG	TRUE
FOXM1	ABCB1	ABCB1 missense	227	6908	0.158817	0.00691925	0.151898	0.562146	0.578145	0.262961	0.270211	0.262733	6.7031e-05	0.155307	0.0189984	1.79112e-05	0.00528293	3	activated in tumors	Oncogene	TRUE
TP63	LCP1	LCP1 missense	71	7082	0.327038	0.00836249	0.318675	0.740772	0.677683	0.469794	0.430193	0.470242	6.75569e-05	0.32286	0.826524	0.0856241	0.0101335	4	deactivated in tumors	TSG	TRUE
ETS1	HRAS	HRAS 3D hotspot 1-166-1wq1	69	7081	0.389418	-4.33748e-05	0.389462	0.647143	0.803825	0.485324	0.601817	0.484511	6.78039e-05	0.3868	0.625639	0.00334616	0.000716546	4	activated in tumors	Oncogene	TRUE
RELA	FGFR3	FGFR3 interface FGF1 // FGFR3 3D hotspot 150-362-1ry7	23	7059	-0.597157	0.0058776	-0.603035	0.657932	0.706972	-0.85316	0.916561	0.852982	6.78853e-05	-0.58868	0.320221	0.00292834	0.00327304	4	no differential activity	Oncogene	TRUE
E2F1	TSC1	TSC1 missense	71	7062	0.310947	0.0134991	0.297447	0.592646	0.636048	0.467952	0.501897	0.467649	6.79358e-05	0.301886	0.0291277	0.00025571	0.00509518	2	activated in tumors	TSG	TRUE
FOXM1	PDGFRA	PDGFRA missense	204	6938	0.171317	0.0071961	0.164121	0.54894	0.577973	0.284355	0.298978	0.283959	6.79981e-05	0.163354	0.0168345	3.66092e-05	0.00509986	3	activated in tumors	Oncogene	TRUE
NR1I2	ZMYM2	ZMYM2 truncating	34	7054	0.520451	-0.00323957	0.523691	0.746782	0.766237	0.683537	0.701263	0.683458	6.83704e-05	0.525192	0.911369	0.74049	0.00769167	5	deactivated in tumors	TSG	TRUE
PBX1	HRAS	HRAS interface SOS2	69	7081	-0.310826	0.00957285	-0.320399	0.65554	0.660286	-0.485276	0.488756	0.485243	6.84173e-05	-0.317956	0.0121346	0.00837863	0.000716546	4	deactivated in tumors	Oncogene	TRUE
FOS	TP53	TP53 hotspot S183	130	4377	0.178773	-0.0542338	0.233006	0.683784	0.659863	0.352741	0.34076	0.353113	6.84207e-05	0.234191	0.0780944	0.027992	0.00399569	2	activated in tumors	TSG	TRUE
E2F6	HNF1A	HNF1A truncating	31	7095	0.58118	0.00884898	0.572332	0.773519	0.806665	0.709624	0.739907	0.709503	6.86197e-05	0.578617	0.360922	0.148489	0.0168771	3	activated in tumors	TSG	TRUE
PBX1	CDH1	CDH1 truncating	122	6863	0.249235	-0.000301568	0.249537	0.758048	0.652964	0.381014	0.329184	0.38216	6.88311e-05	0.239449	0.0128789	0.0358586	0.00224449	4	deactivated in tumors	TSG	TRUE
EZH2	HRAS	HRAS 3D hotspot 5-164-1bkd	53	7081	-0.444958	0.00343151	-0.448389	0.720827	0.815861	-0.55003	0.622048	0.54959	6.89341e-05	-0.447581	0.110557	0.711039	0.000716546	5	activated in tumors	Oncogene	TRUE
MAX	SMARCA4	SMARCA4 truncating	30	6895	0.568821	0.00022908	0.568592	0.878861	0.775043	0.733188	0.646965	0.733627	6.92753e-05	0.564394	0.297398	0.000220744	0.00202053	3	activated in tumors	TSG	TRUE
ESR1	TP53	TP53 interface TP53	596	4377	-0.0403781	0.0908228	-0.131201	0.768883	0.707762	-0.183407	0.170638	0.185374	6.94563e-05	-0.124158	0.0793784	9.06628e-08	0.00404001	3	deactivated in tumors	TSG	TRUE
ESR1	CTCF	CTCF p.A201fs	8	7006	-1.03393	0.0238331	-1.05776	1.10432	0.743246	-1.42231	0.957842	1.42317	6.95995e-05	-1.04729	0.487192	0.031563	0.00687046	5	deactivated in tumors	TSG	TRUE
E2F4	TRIO	TRIO missense	222	6905	0.188771	0.00662212	0.182149	0.728134	0.687124	0.264585	0.250158	0.265089	7.00366e-05	0.18673	0.000265805	4.88272e-05	0.00476024	4	activated in tumors	Oncogene	TRUE
PPARD	TP53	TP53 3D hotspot 96-288-2mej	501	4377	-0.0804886	0.0449838	-0.125472	0.62712	0.684973	-0.184717	0.200077	0.183179	7.07751e-05	-0.127387	0.0840071	0.00325318	0.00410038	4	deactivated in tumors	TSG	TRUE
ETS1	NCOR2	NCOR2 missense	99	6980	0.328855	-0.000303949	0.329159	0.834617	0.802464	0.409953	0.394383	0.410185	7.11352e-05	0.323109	0.575496	0.00525804	0.00533514	4	activated in tumors	Oncogene	TRUE
YY1	CTNNB1	CTNNB1 hotspot S37	185	6783	0.236445	0.00120803	0.235237	0.707602	0.796781	0.296061	0.332442	0.295234	7.15897e-05	0.235215	0.785044	0.00302076	0.0046109	3	activated in tumors	Oncogene	TRUE
STAT6	BRAF	BRAF hotspot S602	483	6510	0.157455	-0.00308683	0.160541	0.770125	0.787305	0.204217	0.208462	0.203913	7.16227e-05	0.148242	0.106664	1.86828e-05	0.00100005	3	deactivated in tumors	Oncogene	TRUE
MYC	PIK3CA	PIK3CA p.1047	246	6014	-0.177127	0.0213676	-0.198494	0.780124	0.723845	-0.273359	0.25444	0.274222	7.18809e-05	-0.189426	0.0740921	0.299815	0.00318929	3	activated in tumors	Oncogene	TRUE
ESR1	EP300	EP300 p.1399	13	6892	-0.789389	0.026768	-0.816157	0.798706	0.742805	-1.0986	1.02185	1.09875	7.30463e-05	-0.818256	0.36056	0.0253806	0.00593501	3	deactivated in tumors	TSG	TRUE
ETS1	HRAS	HRAS 3D hotspot 1-166-4nym	54	7081	0.434163	-4.33748e-05	0.434206	0.602963	0.803825	0.541055	0.72012	0.540175	7.3287e-05	0.43476	0.597838	0.00384778	0.000755497	4	activated in tumors	Oncogene	TRUE
ATF4	TP53	TP53 p.G108fs	6	4377	1.1567	-0.124476	1.28118	0.896944	0.818415	1.56526	1.42838	1.56544	7.36841e-05	1.3233	0.374228	2.87618e-07	0.00425204	3	activated in tumors	TSG	TRUE
VDR	BRAF	BRAF hotspot T599	494	6510	0.131522	-0.0067963	0.138319	0.671191	0.724949	0.191764	0.206079	0.190798	7.39213e-05	0.134428	0.683528	0.0177712	0.00102581	3	deactivated in tumors	Oncogene	TRUE
ATF1	RB1	RB1 missense	164	6859	0.22225	0.00273313	0.219517	0.849505	0.754436	0.290068	0.258406	0.290968	7.46176e-05	0.236773	3.49756e-07	0.0021211	0.00504692	3	activated in tumors	TSG	TRUE
TP53	CDKN1A	CDKN1A truncating	23	7107	0.6119	0.00588047	0.606019	1.23759	0.73855	0.818273	0.489676	0.820553	7.53607e-05	0.612848	0.886343	0.0833294	0.0282603	1	deactivated in tumors	TSG	TRUE
TP53	B2M	B2M truncating	55	7073	0.401221	0.00401671	0.397204	0.767085	0.739504	0.536968	0.51781	0.537123	7.54093e-05	0.396674	0.896111	0.0696764	0.00919051	2	deactivated in tumors	TSG	TRUE
HIF1A	KRAS	KRAS activitygain	114	6615	0.261153	0.00291039	0.258242	0.715258	0.694282	0.371764	0.361048	0.371956	7.59392e-05	0.260256	0.464698	0.845061	0.00302	4	activated in tumors	Oncogene	TRUE
PBX1	TRIO	TRIO p.F2029fs	10	6905	-0.813821	0.0130695	-0.82689	0.797565	0.655606	-1.26087	1.03677	1.26126	7.61638e-05	-0.820971	0.0470611	0.0044076	0.00476024	5	deactivated in tumors	Oncogene	TRUE
RUNX1	BRAF	BRAF hotspot T599	494	6510	0.117721	-0.0235011	0.141222	0.877796	0.795313	0.17622	0.160883	0.177568	7.63086e-05	0.1491	0.077967	0.967288	0.00104628	3	deactivated in tumors	Oncogene	TRUE
GATA2	BRAF	BRAF activitygain	467	6510	0.156562	0.00299379	0.153568	0.699031	0.782414	0.197611	0.219687	0.196274	7.63214e-05	0.148506	0.650051	0.0251044	0.00104628	5	activated in tumors	Oncogene	TRUE
SOX2	FBXW7	FBXW7 p.465	53	6806	-0.405947	0.000386255	-0.406333	0.765244	0.729779	-0.556579	0.530985	0.556789	7.64057e-05	-0.398868	0.439598	0.0905815	0.0171913	5	deactivated in tumors	TSG	TRUE
SP1	HRAS	HRAS interface AFDN	28	7081	-0.538234	0.0152871	-0.553521	0.758904	0.738274	-0.749669	0.729368	0.74975	7.68109e-05	-0.553329	0.714355	0.303414	0.000785334	3	no differential activity	Oncogene	TRUE
E2F7	PIK3CA	PIK3CA interface PIK3R3	573	6014	-0.0951807	0.0230803	-0.118261	0.672344	0.617154	-0.190087	0.175894	0.191623	7.70381e-05	-0.108303	0.0131113	0.0300387	0.00338986	3	activated in tumors	Oncogene	TRUE
RELA	STK11	STK11 p.G279fs	6	7032	-1.14819	0.00748658	-1.15567	0.349667	0.706999	-1.63506	3.30507	1.63462	7.77744e-05	-1.14103	0.334172	0.00575376	0.00312322	3	no differential activity	TSG	TRUE
E2F4	TP53	TP53 hotspot T211	99	4377	0.199022	-0.0647709	0.263793	0.692396	0.668715	0.394166	0.380986	0.394477	7.79018e-05	0.268302	0.0595581	3.98938e-07	0.00447773	2	activated in tumors	TSG	TRUE
RUNX1	ARID1A	ARID1A p.G1465fs // ARID1A p.G1631fs // ARID1A p.G1848fs	27	6602	0.60101	-0.0180103	0.61902	0.510747	0.802454	0.772311	1.21199	0.771409	7.79277e-05	0.61153	0.205192	0.72157	0.00584457	4	deactivated in tumors	TSG	TRUE
FOXM1	CREBBP	CREBBP missense	282	6820	0.1387	0.00573919	0.132961	0.574386	0.57761	0.230243	0.231484	0.230192	7.80303e-05	0.138922	0.0111859	1.89286e-05	0.00949064	3	activated in tumors	TSG	TRUE
FOS	EGFR	EGFR inframe indel	35	6797	-0.43177	0.0220631	-0.453833	0.906452	0.673652	-0.672336	0.50067	0.673691	7.83152e-05	-0.452239	0.0455707	0.974504	0.0243486	2	activated in tumors	Oncogene	TRUE
MYC	MSH6	MSH6 truncating	61	7000	0.363789	0.00328124	0.360508	0.768256	0.734101	0.490889	0.469255	0.491087	7.83374e-05	0.373312	0.0319763	0.00437121	0.00107566	4	activated in tumors	TSG	TRUE
CEBPB	TP53	TP53 inframe indel	64	4377	-0.336039	0.0526016	-0.38864	0.809502	0.779406	-0.498358	0.480098	0.498636	7.83598e-05	-0.388296	0.566115	0.419713	0.0044864	3	deactivated in tumors	TSG	TRUE
ETS1	GATA3	GATA3 truncating	107	6972	0.283679	-0.00164281	0.285322	0.858691	0.801273	0.355691	0.332275	0.356086	7.95702e-05	0.309749	0.536736	0.00159797	0.00238085	4	activated in tumors	TSG	TRUE
FOXM1	MMP2	MMP2 missense	87	7064	0.252059	0.00922205	0.242837	0.46688	0.578833	0.420413	0.520127	0.419529	7.98663e-05	0.24559	0.0189461	2.50342e-05	0.00598998	1	activated in tumors	Oncogene	TRUE
NRF1	PIK3CA	PIK3CA p.H1047R	208	6014	-0.226952	0.016687	-0.243639	0.907047	0.773603	-0.312995	0.268607	0.314941	7.99357e-05	-0.218391	0.00512677	0.00330539	0.00348853	5	activated in tumors	Oncogene	TRUE
SMAD3	MSH6	MSH6 truncating	61	7000	-0.408381	0.0234688	-0.43185	0.782298	0.83226	-0.519145	0.552028	0.518888	8.03163e-05	-0.421778	0.000279633	0.000454363	0.00107566	4	deactivated in tumors	TSG	TRUE
MYCN	EGFR	EGFR interface BMX	66	6797	-0.363209	0.0182697	-0.381479	0.963064	0.75503	-0.503756	0.396109	0.50525	8.03401e-05	-0.369645	0.0734248	0.00221432	0.0243486	2	activated in tumors	Oncogene	TRUE
PPARA	MET	MET interface BTK	33	6986	-0.550966	-0.00599703	-0.544969	0.906857	0.789506	-0.689764	0.600943	0.690266	8.04303e-05	-0.544018	0.122421	0.182623	0.0273292	4	deactivated in tumors	Oncogene	TRUE
MYB	GATA3	GATA3 truncating	107	6972	-0.297755	-0.00168359	-0.296072	0.701199	0.766502	-0.386736	0.422236	0.386264	8.06184e-05	-0.29558	0.33159	0.845717	0.00238085	1	deactivated in tumors	TSG	TRUE
E2F4	RB1	RB1 missense	164	6859	0.202902	0.00115492	0.201747	0.752451	0.684915	0.293853	0.26812	0.294558	8.1178e-05	0.213788	0.000462736	2.40167e-05	0.00504692	2	activated in tumors	TSG	TRUE
PBX1	ABCB1	ABCB1 missense	227	6908	-0.165496	0.0139165	-0.179413	0.678378	0.658899	-0.272033	0.264474	0.272292	8.13165e-05	-0.175388	0.0161901	0.00771911	0.00528293	4	deactivated in tumors	Oncogene	TRUE
FOXM1	PIK3CA	PIK3CA p.H1047R	208	6014	-0.147599	0.0243339	-0.171932	0.731269	0.567746	-0.299567	0.235115	0.302834	8.14235e-05	-0.160943	0.0155705	0.117772	0.00352457	3	activated in tumors	Oncogene	TRUE
BACH1	HRAS	HRAS interface SOS2	69	7081	-0.334652	0.0261146	-0.360767	0.822599	0.753897	-0.478102	0.438569	0.478536	8.184e-05	-0.359723	0.0441628	0.748418	0.00082995	4	no differential activity	Oncogene	TRUE
ATF4	PIK3CA	PIK3CA p.726	23	6014	-0.662295	0.0109602	-0.673255	0.703084	0.815221	-0.826241	0.957574	0.825855	8.22101e-05	-0.670897	0.110424	0.685409	0.00352992	4	activated in tumors	Oncogene	TRUE
E2F6	CAD	CAD missense	162	6969	0.25571	0.00395268	0.251757	0.830372	0.805192	0.312443	0.303186	0.312667	8.24039e-05	0.252406	0.380893	0.15919	0.00309015	3	activated in tumors	Oncogene	TRUE
SPI1	CASP8	CASP8 truncating	67	7006	0.379134	-0.00308782	0.382222	0.753364	0.769731	0.496662	0.507353	0.496565	8.27312e-05	0.372221	0.0333688	0.0470131	0.00694761	4	activated in tumors	TSG	TRUE
E2F4	HNF1A	HNF1A p.G226fs	11	7095	0.824849	0.0120181	0.812831	0.634605	0.689031	1.1798	1.28085	1.17967	8.31076e-05	0.817716	0.000693732	0.000124506	0.0168771	2	activated in tumors	TSG	TRUE
VDR	BRAF	BRAF p.600	460	6510	0.135922	-0.0067963	0.142718	0.663437	0.724949	0.197929	0.21512	0.196866	8.32738e-05	0.138085	0.697788	0.0183404	0.00113471	3	deactivated in tumors	Oncogene	TRUE
PBX1	KRAS	KRAS p.13	74	6615	-0.291055	0.0137331	-0.304788	0.706751	0.65885	-0.462226	0.431252	0.462606	8.34809e-05	-0.303455	0.0602326	0.0381133	0.00319447	5	deactivated in tumors	Oncogene	TRUE
E2F1	SETD2	SETD2 missense	205	6852	0.183785	0.0109995	0.172785	0.656387	0.636122	0.271369	0.263237	0.271623	8.35101e-05	0.177517	0.0144716	0.000158083	0.00665923	3	activated in tumors	TSG	TRUE
MYB	PTEN	PTEN activityloss	94	6484	0.289	-0.0190827	0.308083	0.914522	0.759847	0.404174	0.336879	0.405454	8.36034e-05	0.312204	0.246798	0.14561	0.0154689	4	deactivated in tumors	TSG	TRUE
VDR	GNAI1	GNAI1 truncating	6	7120	-1.1561	0.00492	-1.16102	0.597601	0.723859	-1.60411	1.9428	1.60393	8.36936e-05	-1.16337	0.517155	0.0146848	0.0313851	4	deactivated in tumors	TSG	TRUE
NRF1	PIK3CA	PIK3CA p.545	240	6014	-0.204141	0.016687	-0.220828	0.811516	0.773603	-0.284907	0.272117	0.285453	8.43683e-05	-0.201436	0.00899939	0.00170893	0.00359361	5	activated in tumors	Oncogene	TRUE
TP53	KRAS	KRAS interface KRAS	37	6615	0.471848	-0.00509524	0.476943	0.906682	0.737242	0.646034	0.526032	0.64693	8.44456e-05	0.478975	0.464103	0.120435	0.00319447	3	deactivated in tumors	Oncogene	TRUE
RUNX1	GATA3	GATA3 truncating	107	6972	-0.315685	-0.00618812	-0.309497	0.859081	0.800595	-0.386145	0.360265	0.386583	8.44558e-05	-0.308556	0.163865	0.801461	0.00238085	3	deactivated in tumors	TSG	TRUE
SPI1	HRAS	HRAS 3D hotspot 5-164-1nvw	29	7081	-0.561655	0.00592544	-0.567581	0.679282	0.771262	-0.736237	0.83556	0.735911	8.54442e-05	-0.56371	0.0199259	0.0394029	0.000854214	4	activated in tumors	Oncogene	TRUE
ZEB1	PIK3R1	PIK3R1 p.T213fs // PIK3R1 p.T276fs // PIK3R1 p.T306fs // PIK3R1 p.T576fs	6	6916	0.995512	-0.0100937	1.00561	0.899367	0.624181	1.61045	1.11813	1.61108	8.56373e-05	1.00248	0.992279	0.173411	0.0492414	4	no differential activity	TSG	TRUE
EZH2	RB1	RB1 truncating	155	6859	0.246299	-0.0105564	0.256855	0.819891	0.811193	0.316564	0.31328	0.316639	8.56447e-05	0.259185	0.14296	0.761375	0.00504692	3	activated in tumors	TSG	TRUE
TP53	PIK3CA	PIK3CA 3D hotspot 5-1062-3hhm	513	6014	0.126347	-0.0105714	0.136918	0.768683	0.735431	0.185502	0.17812	0.186174	8.59823e-05	0.134369	0.681361	0.327143	0.00363329	2	deactivated in tumors	Oncogene	TRUE
E2F7	TP53	TP53 3D hotspot 97-287-1ycs	581	4377	0.0651747	-0.0438711	0.109046	0.617448	0.63579	0.172086	0.176607	0.171512	8.60763e-05	0.109848	0.0447788	0.00135148	0.00490894	3	activated in tumors	TSG	TRUE
PAX6	HRAS	HRAS interface AFDN	28	7081	-0.517454	0.0108213	-0.528275	0.649792	0.721289	-0.732667	0.812991	0.732405	8.62821e-05	-0.536308	0.0174178	0.274882	0.000854214	4	deactivated in tumors	Oncogene	TRUE
E2F4	EGFR	EGFR interaction decreasing LAT // EGFR interaction decreasing ACTN4 // EGFR interaction decreasing ABL1 // EGFR interaction decreasing TGFA // EGFR interaction decreasing RAF1 // EGFR interaction decreasing NR3C1 // EGFR interaction decreasing ITGB2 // EGFR interaction decreasing RET // EGFR interaction decreasing HSP90AB1 // EGFR interaction decreasing FGR // EGFR interaction decreasing PIM1 //…	22	6797	-0.584574	0.0155518	-0.600126	0.65649	0.685998	-0.874935	0.914144	0.874822	8.64671e-05	-0.574904	0.00139135	0.000327898	0.0243486	2	activated in tumors	Oncogene	TRUE
EZH2	HRAS	HRAS 3D hotspot 1-166-4nym	54	7081	-0.434913	0.00343151	-0.438345	0.717799	0.815861	-0.537731	0.610679	0.537279	8.66426e-05	-0.43733	0.111287	0.717347	0.000854214	5	activated in tumors	Oncogene	TRUE
PBX1	ARID1A	ARID1A p.P1756fs // ARID1A p.P1922fs // ARID1A p.P2139fs	9	6602	-0.845824	0.0147477	-0.860572	0.536644	0.654223	-1.31567	1.60362	1.31541	8.6761e-05	-0.856344	0.0297153	0.0151587	0.00596482	4	deactivated in tumors	TSG	TRUE
ATF1	MET	MET missense	157	6986	0.251867	0.014579	0.237288	0.852473	0.761913	0.310584	0.278352	0.311437	8.69196e-05	0.241752	5.17282e-06	0.00268482	0.0273292	3	activated in tumors	Oncogene	TRUE
BACH1	HRAS	HRAS missense	78	7081	-0.312741	0.0261146	-0.338856	0.816794	0.753897	-0.449052	0.414861	0.449472	8.69719e-05	-0.337319	0.0440875	0.741925	0.000854214	4	no differential activity	Oncogene	TRUE
ATF4	TP53	TP53 p.132	30	4377	0.448075	-0.124476	0.572551	0.904678	0.818415	0.699075	0.632879	0.699585	8.71363e-05	0.587826	0.355911	3.13191e-07	0.00495006	3	activated in tumors	TSG	TRUE
GATA3	BRAF	BRAF p.600	460	6510	0.156642	0.0162078	0.140434	0.653635	0.703904	0.200419	0.214851	0.199508	8.76923e-05	0.133775	0.295781	0.070807	0.00118777	4	deactivated in tumors	Oncogene	TRUE
PPARG	PIK3CA	PIK3CA missense	1097	6014	0.0988832	-0.00262904	0.101512	0.853647	0.728701	0.135472	0.118916	0.139306	8.77891e-05	0.0978283	0.489367	0.491006	0.00368043	4	deactivated in tumors	Oncogene	TRUE
CREB1	ABCB1	ABCB1 missense	227	6908	0.228341	0.00636255	0.221978	0.867947	0.859869	0.258076	0.255751	0.258153	8.80489e-05	0.227692	0.00856979	0.116343	0.00528293	3	activated in tumors	Oncogene	TRUE
YY1	MSH6	MSH6 truncating	61	7000	0.402861	0.0060991	0.396762	0.752579	0.796451	0.498389	0.527203	0.498162	8.86116e-05	0.401713	0.969117	0.00211614	0.00114584	5	activated in tumors	TSG	TRUE
E2F4	CDKN1B	CDKN1B truncating	36	7114	0.453374	0.0109887	0.442385	0.867775	0.688304	0.641792	0.509792	0.642718	8.86356e-05	0.451006	0.0011391	5.12878e-05	0.00664767	3	activated in tumors	TSG	TRUE
ATF3	SETD2	SETD2 truncating	121	6852	0.283218	-0.000860234	0.284079	0.874095	0.784446	0.361388	0.324998	0.362139	8.87897e-05	0.282823	0.928766	0.33054	0.00665923	4	no differential activity	TSG	TRUE
E2F1	TP53	TP53 DNA/RNA aff. disabling	467	4377	0.0716931	-0.0480138	0.119707	0.599626	0.62954	0.191005	0.199636	0.19015	8.90199e-05	0.119426	0.116955	1.34875e-05	0.00503746	2	activated in tumors	TSG	TRUE
GLI2	ATM	ATM missense	359	6712	-0.154856	0.0142061	-0.169062	0.789207	0.751121	-0.224489	0.214218	0.22508	8.91509e-05	-0.160264	0.00273565	0.666746	0.00724351	5	deactivated in tumors	TSG	TRUE
SPI1	HRAS	HRAS interface AFDN	28	7081	-0.571569	0.00592544	-0.577495	0.689607	0.771262	-0.749051	0.837427	0.748766	8.96057e-05	-0.572034	0.0202317	0.0397421	0.000873207	4	activated in tumors	Oncogene	TRUE
SMAD4	MTOR	MTOR missense	244	6901	-0.181315	0.0181586	-0.199473	0.792012	0.750405	-0.265307	0.251857	0.265821	8.96741e-05	-0.192026	0.000237961	0.0268821	0.0269022	3	deactivated in tumors	Oncogene	TRUE
NR1I2	KRAS	KRAS p.G12A	33	6615	-0.513868	0.00540666	-0.519275	0.90541	0.759579	-0.682943	0.573524	0.683635	9.02542e-05	-0.520004	0.882945	0.721103	0.00333291	4	deactivated in tumors	Oncogene	TRUE
VDR	BRAF	BRAF activitygain	467	6510	0.134267	-0.0067963	0.141063	0.671901	0.724949	0.195507	0.209947	0.194584	9.02876e-05	0.136467	0.701427	0.016408	0.001212	3	deactivated in tumors	Oncogene	TRUE
FOXM1	PLCG1	PLCG1 missense	103	7047	0.230981	0.00853534	0.222446	0.588367	0.577301	0.385214	0.378074	0.38532	9.04196e-05	0.224233	0.0171828	2.98173e-05	0.0178114	3	activated in tumors	Oncogene	TRUE
GATA3	BRAF	BRAF interaction disrupting MAP2K1	469	6510	0.154611	0.0162078	0.138403	0.659293	0.703904	0.197436	0.209926	0.196622	9.05533e-05	0.132236	0.297044	0.074752	0.001212	4	deactivated in tumors	Oncogene	TRUE
ATF4	TP53	TP53 3D hotspot 95-290-1gzh	333	4377	0.0677616	-0.124476	0.192238	0.791801	0.818415	0.235422	0.242786	0.23489	9.05967e-05	0.181678	0.181063	3.2948e-07	0.00510689	3	activated in tumors	TSG	TRUE
E2F1	TRIO	TRIO missense	222	6905	0.178741	0.0109003	0.167841	0.65216	0.63455	0.264273	0.257361	0.264503	9.06064e-05	0.169701	0.0132154	0.000209737	0.00485392	3	activated in tumors	Oncogene	TRUE
E2F4	NR4A2	NR4A2 p.N231fs // NR4A2 p.N294fs	5	7068	1.186	0.00832772	1.17767	0.224877	0.68846	1.71102	5.23694	1.71058	9.07447e-05	1.20404	0.000552085	5.50735e-05	0.00272234	3	activated in tumors	TSG	TRUE
STAT1	RHOA	RHOA 3D hotspot 7-177-3bji	24	7089	0.638381	0.0142177	0.624164	0.785546	0.798323	0.781884	0.79456	0.781844	9.08369e-05	0.639044	0.727055	0.00018542	0.224821	4	deactivated in tumors	Oncogene	FALSE
GATA3	BRAF	BRAF interaction increasing MAP2K1 // BRAF p.V600E	457	6510	0.156916	0.0162078	0.140708	0.655705	0.703904	0.200768	0.214591	0.199897	9.13151e-05	0.133901	0.297505	0.0710889	0.00121501	4	deactivated in tumors	Oncogene	TRUE
FOXM1	SMARCA4	SMARCA4 missense	230	6895	0.160651	0.00602015	0.154631	0.516862	0.57919	0.267856	0.299173	0.266978	9.15549e-05	0.151377	0.0189451	2.56523e-05	0.00252981	3	activated in tumors	TSG	TRUE
ESR1	CTCF	CTCF p.K202fs	9	7006	-0.94649	0.0238331	-0.970323	0.695974	0.743246	-1.30561	1.39419	1.30552	9.16062e-05	-0.970638	0.505071	0.0326136	0.00687046	5	deactivated in tumors	TSG	TRUE
E2F7	CARD11	CARD11 p.R555fs	20	6914	0.532069	0.00833854	0.523731	0.496667	0.626115	0.836902	1.05449	0.836477	9.16714e-05	0.548698	0.015221	0.0028862	0.00247513	4	activated in tumors	Oncogene	TRUE
PPARG	PIK3CA	PIK3CA p.542	145	6014	0.237082	-0.00262904	0.239711	0.85788	0.728701	0.327482	0.279423	0.328956	9.18711e-05	0.241246	0.788999	0.558454	0.00382147	4	deactivated in tumors	Oncogene	TRUE
SPI1	TP53	TP53 p.273	215	4377	0.208761	0.00673529	0.202026	0.808489	0.76482	0.263427	0.24988	0.264148	9.23816e-05	0.209625	0.00181434	0.288841	0.00518748	3	activated in tumors	TSG	TRUE
GATA3	RUNX1	RUNX1 truncating	37	7043	0.481573	0.0231419	0.458432	0.625328	0.701844	0.653524	0.733106	0.653182	9.31808e-05	0.452423	0.101678	0.0599822	0.0271587	4	deactivated in tumors	TSG	TRUE
CREB1	CSF1R	CSF1R missense	88	7061	0.367082	0.0104913	0.35659	0.872479	0.860308	0.41442	0.408709	0.414491	9.32468e-05	0.360953	0.0120824	0.167567	0.0104903	4	activated in tumors	Oncogene	TRUE
PBX1	HRAS	HRAS interface RASGRF1 // HRAS 3D hotspot 1-166-1xd2 // HRAS 3D hotspot 1-166-4nyi	70	7081	-0.303066	0.00957285	-0.312639	0.654003	0.660286	-0.473533	0.478038	0.47349	9.33681e-05	-0.309783	0.0122806	0.00861798	0.000890709	4	deactivated in tumors	Oncogene	TRUE
E2F7	TP53	TP53 3D hotspot 95-290-1gzh	333	4377	0.0957182	-0.0438711	0.139589	0.596463	0.63579	0.220486	0.234028	0.219552	9.37457e-05	0.140669	0.00557175	0.000134618	0.00524391	3	activated in tumors	TSG	TRUE
RELA	HRAS	HRAS 3D hotspot 5-164-1nvw	29	7081	-0.506516	0.00642155	-0.512938	0.702418	0.707711	-0.724806	0.730245	0.724784	9.40564e-05	-0.51437	0.401833	0.00143273	0.000890709	3	no differential activity	Oncogene	TRUE
PAX6	FGFR2	FGFR2 p.382	8	6972	-0.9884	0.0112404	-0.99964	1.00518	0.719638	-1.38842	0.994493	1.38909	9.41932e-05	-0.995211	0.0410612	0.229994	0.124861	5	deactivated in tumors	Oncogene	FALSE
STAT6	KEAP1	KEAP1 interface KEAP1	36	6941	-0.508058	0.0177739	-0.525832	0.821288	0.787215	-0.667817	0.640253	0.667965	9.45706e-05	-0.513459	0.0516888	5.10586e-05	0.00159588	4	deactivated in tumors	Oncogene	TRUE
E2F1	EGFR	EGFR inframe indel	35	6797	-0.414639	0.016789	-0.431428	0.79451	0.632268	-0.681368	0.543011	0.682349	9.52516e-05	-0.418832	0.0304014	0.00141923	0.0243486	2	activated in tumors	Oncogene	TRUE
IRF1	HRAS	HRAS hotspot Y64	30	7081	-0.583552	0.012042	-0.595594	0.679496	0.837509	-0.711645	0.876524	0.711149	9.52904e-05	-0.597859	0.607802	0.0106306	0.000890709	4	no differential activity	Oncogene	TRUE
MYB	AJUBA	AJUBA missense	30	7100	-0.54734	-0.00476612	-0.542574	0.891658	0.766109	-0.70771	0.6085	0.70822	9.53642e-05	-0.547893	0.189891	0.940026	0.00476821	5	deactivated in tumors	TSG	TRUE
ELK1	HRAS	HRAS 3D hotspot 5-163-2efd	47	7081	0.411954	0.000784534	0.41117	0.704083	0.715323	0.574861	0.583979	0.574803	9.55451e-05	0.408636	0.356798	0.0620898	0.000890709	3	activated in tumors	Oncogene	TRUE
STAT3	HRAS	HRAS 3D hotspot 1-166-4nym	54	7081	-0.373612	0.0112162	-0.384828	0.820361	0.721522	-0.532777	0.469096	0.533356	9.58525e-05	-0.384999	0.421185	0.0184342	0.000890709	3	deactivated in tumors	Oncogene	TRUE
VDR	BRAF	BRAF hotspot S602	483	6510	0.131036	-0.0067963	0.137833	0.674735	0.724949	0.19101	0.204277	0.190128	9.67907e-05	0.133742	0.70311	0.0195183	0.00128034	3	deactivated in tumors	Oncogene	TRUE
GABPA	HRAS	HRAS interface SOS2	69	7081	0.369142	-0.00174969	0.370892	0.677513	0.783918	0.473697	0.547432	0.473126	9.68906e-05	0.369391	0.371853	0.0631807	0.000890709	4	activated in tumors	Oncogene	TRUE
JUND	HRAS	HRAS p.12	16	7081	0.583142	0.00301139	0.580131	0.555306	0.601566	0.964517	1.0447	0.964367	9.70036e-05	0.586928	0.0165132	0.0619353	0.000890709	3	deactivated in tumors	Oncogene	TRUE
E2F7	EP300	EP300 missense	213	6892	0.177805	0.00932375	0.168481	0.550963	0.628121	0.269158	0.305793	0.26823	9.70118e-05	0.169975	0.0220292	0.00380096	0.00727589	3	activated in tumors	TSG	TRUE
ETS1	HRAS	HRAS 3D hotspot 1-166-4nyj	69	7081	0.381026	-4.33748e-05	0.38107	0.661822	0.803825	0.474798	0.575788	0.47407	9.71144e-05	0.378485	0.621118	0.00399794	0.000890709	4	activated in tumors	Oncogene	TRUE
PPARG	PIK3CA	PIK3CA p.E81K // PIK3CA p.81	10	6014	-0.901165	-0.00262904	-0.898536	0.639361	0.728701	-1.23328	1.40536	1.23307	9.71443e-05	-0.899785	0.68917	0.61934	0.00400949	4	deactivated in tumors	Oncogene	TRUE
CREB1	MET	MET missense	157	6986	0.275301	0.00799037	0.267311	0.865906	0.858797	0.311205	0.308706	0.311262	9.73693e-05	0.270279	0.011054	0.13205	0.0273292	3	activated in tumors	Oncogene	TRUE
RELA	HSPA8	HSPA8 interface BAG3	5	7068	1.24305	0.00478516	1.23826	0.402661	0.707829	1.74971	3.0752	1.74938	9.77192e-05	1.23348	0.303771	0.0014381	0.00982823	3	no differential activity	Oncogene	TRUE
E2F4	HNF1A	HNF1A p.P172fs // HNF1A p.P289fs	6	7095	1.10188	0.0120181	1.08986	0.254805	0.689031	1.58222	4.27725	1.58174	9.77439e-05	1.09557	0.000597504	0.00012798	0.0168771	2	activated in tumors	TSG	TRUE
MYC	B2M	B2M truncating	55	7073	0.38805	0.00673351	0.381316	0.746938	0.734433	0.51913	0.510506	0.519198	9.8043e-05	0.387359	0.0367852	0.00386772	0.0106213	4	activated in tumors	TSG	TRUE
E2F4	MLLT4	MLLT4 missense	126	7002	0.247139	0.00990682	0.237232	0.743344	0.688532	0.344049	0.319142	0.344548	9.88153e-05	0.241073	0.00132584	5.33765e-05	0.00296446	3	activated in tumors	TSG	TRUE
E2F7	PIK3CA	PIK3CA interface PIK3R1	580	6014	-0.0927361	0.0230803	-0.115816	0.669125	0.617154	-0.186232	0.173086	0.187662	9.89272e-05	-0.105991	0.0128239	0.0290466	0.00403725	3	activated in tumors	Oncogene	TRUE
ATF1	EGFR	EGFR inframe indel	35	6797	-0.497748	0.0201311	-0.517879	0.963068	0.760992	-0.679515	0.537739	0.680532	9.90888e-05	-0.50241	4.20971e-06	0.00702904	0.0243486	3	activated in tumors	Oncogene	TRUE
YY1	PBRM1	PBRM1 truncating	183	6866	0.246403	0.00281005	0.243593	0.639641	0.801234	0.305457	0.380828	0.304023	9.92564e-05	0.233177	0.862903	0.00430974	0.00559292	4	activated in tumors	TSG	TRUE
GATA3	PIK3CA	PIK3CA interaction increasing PIK3R1 // PIK3CA p.E545K	219	6014	0.183477	0.0013729	0.182104	0.717349	0.692491	0.262635	0.253858	0.26297	9.93335e-05	0.186564	0.0604792	0.925813	0.00403725	4	deactivated in tumors	Oncogene	TRUE
ATF3	PBRM1	PBRM1 truncating	183	6866	0.230432	-0.00176569	0.232198	0.777684	0.789195	0.294331	0.298576	0.294221	9.94297e-05	0.230776	0.930283	0.625331	0.00559292	4	no differential activity	TSG	TRUE
ATF4	TP53	TP53 interface TP53BP1 // TP53 3D hotspot 95-289-1kzy // TP53 3D hotspot 95-292-1gzh	353	4377	0.0624576	-0.124476	0.186934	0.775695	0.818415	0.229279	0.240989	0.22841	9.99375e-05	0.175434	0.166672	1.649e-07	0.00556893	3	activated in tumors	TSG	TRUE
CREB1	ATM	ATM p.337	15	6712	0.851931	0.00286756	0.849063	0.711003	0.858481	0.989353	1.19418	0.98903	0.000100003	0.863592	0.0036401	0.232654	0.00750022	3	activated in tumors	TSG	TRUE
FOXM1	EGFR	EGFR p.750del	18	6797	-0.526077	0.0129382	-0.539015	0.637395	0.576523	-0.934681	0.845653	0.934941	0.000100323	-0.529209	0.0309298	0.000135151	0.0243486	2	activated in tumors	Oncogene	TRUE
EGR1	GNAQ	GNAQ missense	49	7106	0.480462	0.0201844	0.460278	0.718719	0.844482	0.545546	0.640414	0.545042	0.000100379	0.47076	0.00547311	0.157125	0.0204097	4	deactivated in tumors	Oncogene	TRUE
CREB1	RB1	RB1 missense	164	6859	0.260386	0.00585064	0.254535	0.788631	0.861475	0.296021	0.322755	0.295464	0.000100582	0.264608	0.00910145	0.108723	0.00553198	2	activated in tumors	TSG	TRUE
STAT6	BRAF	BRAF activitygain	467	6510	0.158469	-0.00308683	0.161556	0.79842	0.787305	0.205006	0.202344	0.205201	0.000100738	0.147875	0.0874529	2.15821e-05	0.0013248	3	deactivated in tumors	Oncogene	TRUE
JUN	KRAS	KRAS p.61	23	6615	0.575015	-0.00119291	0.576208	0.960209	0.714666	0.805188	0.600086	0.806262	0.000101097	0.581569	0.176419	0.0586094	0.0036465	3	deactivated in tumors	Oncogene	TRUE
PPARG	ARID1A	ARID1A p.G1465fs // ARID1A p.G1631fs // ARID1A p.G1848fs	27	6602	-0.542145	0.012415	-0.55456	0.713822	0.747266	-0.742246	0.776889	0.742119	0.000101102	-0.560941	0.33754	0.18305	0.00641607	5	deactivated in tumors	TSG	TRUE
HSF1	EGFR	EGFR activitygain	33	6797	-0.457865	0.0136671	-0.471532	0.770582	0.693749	-0.679315	0.611917	0.679687	0.000101156	-0.471614	0.539562	0.446013	0.0243486	3	activated in tumors	Oncogene	TRUE
ATF1	TP53	TP53 p.249	39	4377	0.433555	-0.0329488	0.466504	0.701048	0.74829	0.623755	0.665437	0.623427	0.000101673	0.466793	1.74964e-05	0.0034647	0.0056441	2	activated in tumors	TSG	TRUE
JUND	CASP8	CASP8 truncating	67	7006	0.281591	-0.000812548	0.282403	0.551223	0.602459	0.469108	0.512321	0.468751	0.000102304	0.287349	0.0192691	0.0668587	0.00694761	3	deactivated in tumors	TSG	TRUE
ZEB1	PTEN	PTEN truncating	325	6484	0.12851	-0.0127853	0.141295	0.735206	0.620627	0.225511	0.192184	0.227665	0.000102321	0.138988	0.808935	0.261153	0.0171687	3	no differential activity	TSG	TRUE
LEF1	PIK3CA	PIK3CA activitygain	599	6014	0.142245	0.00113585	0.141109	0.822057	0.777714	0.180486	0.171654	0.181441	0.000102539	0.131758	0.445009	0.0282029	0.00413598	4	deactivated in tumors	Oncogene	TRUE
STAT3	DNMT1	DNMT1 p.K130fs	16	7015	-0.699691	0.0100852	-0.709776	0.981386	0.721891	-0.982329	0.723239	0.983218	0.000102962	-0.702601	0.425011	0.0226342	0.0104551	2	deactivated in tumors	Oncogene	TRUE
NR1I2	TGFBR2	TGFBR2 p.E125fs // TGFBR2 p.E150fs	24	7035	0.60611	-0.0022617	0.608372	0.63483	0.766357	0.794256	0.958322	0.79385	0.000103016	0.609488	0.901325	0.953474	0.0040344	4	deactivated in tumors	TSG	TRUE
YY1	BRAF	BRAF hotspot T599	494	6510	-0.128701	0.0181624	-0.146863	0.748225	0.797297	-0.18498	0.196282	0.184202	0.000103033	-0.144949	0.788793	0.00320546	0.00134715	3	activated in tumors	Oncogene	TRUE
VDR	ABL1	ABL1 interface SRC	5	7040	-1.24145	0.00425723	-1.24571	0.987254	0.724481	-1.71903	1.26179	1.71945	0.000103557	-1.25888	0.491551	0.00699519	0.0304701	3	deactivated in tumors	Oncogene	TRUE
RUNX2	HRAS	HRAS hotspot Y64	30	7081	-0.510046	0.00731003	-0.517356	0.672833	0.716573	-0.722161	0.768923	0.721987	0.000103662	-0.508752	0.000245096	0.0879606	0.000943825	4	no differential activity	Oncogene	TRUE
E2F6	PTEN	PTEN p.L265fs	15	6484	0.808521	0.00706907	0.801452	0.515717	0.808822	0.991522	1.55405	0.990888	0.000103707	0.811921	0.306684	0.181082	0.0171687	3	activated in tumors	TSG	TRUE
STAT3	CASP8	CASP8 missense	92	7006	0.29674	0.00329573	0.293445	0.644585	0.723395	0.406187	0.455246	0.40565	0.000104666	0.294422	0.260156	0.0306239	0.00694761	3	deactivated in tumors	TSG	TRUE
HNF1A	KEAP1	KEAP1 truncating	35	6941	0.331133	-0.00671235	0.337846	0.59789	0.503853	0.669859	0.565063	0.670525	0.000104678	0.33189	0.0406832	0.551537	0.00172335	4	deactivated in tumors	Oncogene	TRUE
SMAD3	EGFR	EGFR inframe indel	35	6797	0.571013	0.0129399	0.558074	0.829054	0.833487	0.669582	0.673145	0.669565	0.000104941	0.547389	4.00293e-05	0.000793384	0.0243486	3	deactivated in tumors	Oncogene	TRUE
TCF3	VHL	VHL interface TCEB2	41	6853	0.512453	0.0101467	0.502306	0.854865	0.848182	0.592188	0.587585	0.592215	0.00010516	0.515681	0.0120517	0.195399	0.0528041	6	deactivated in tumors	TSG	FALSE
STAT6	BRAF	BRAF interaction increasing MAP2K1 // BRAF p.V600E	457	6510	0.159856	-0.00308683	0.162943	0.770062	0.787305	0.207257	0.211597	0.206962	0.000105453	0.148683	0.0908072	2.13951e-05	0.00137087	3	deactivated in tumors	Oncogene	TRUE
MEF2A	CTNNB1	CTNNB1 hotspot T41	147	6783	-0.267415	0.00359725	-0.271012	0.669932	0.842371	-0.322979	0.404537	0.321725	0.00010574	-0.271222	0.712377	0.000197273	0.00671838	5	no differential activity	Oncogene	TRUE
LEF1	TP53	TP53 p.190	8	4377	-1.03561	0.0211132	-1.05672	0.82953	0.768714	-1.37448	1.27388	1.37466	0.00010582	-1.05537	0.804518	0.0284606	0.00585205	3	deactivated in tumors	TSG	TRUE
TP53	MSH6	MSH6 p.T1085fs // MSH6 p.T783fs // MSH6 p.T955fs	26	7000	0.569628	0.00429998	0.565328	0.790536	0.739154	0.764635	0.71512	0.764831	0.000106031	0.564171	0.603903	0.124711	0.00132539	2	deactivated in tumors	TSG	TRUE
NR3C1	EGFR	EGFR p.750del	18	6797	-0.696388	0.0244574	-0.720846	1.0551	0.792855	-0.908304	0.683202	0.909177	0.000106621	-0.726322	0.193452	0.224944	0.0243486	3	deactivated in tumors	Oncogene	TRUE
FOXO3	GATA3	GATA3 truncating	107	6972	0.330203	0.00574418	0.324459	0.816961	0.854754	0.379839	0.397153	0.379593	0.000106798	0.324134	0.984763	0.971058	0.00287383	3	deactivated in tumors	TSG	TRUE
PBX1	CASP8	CASP8 missense	92	7006	-0.259064	0.0119289	-0.270993	0.677123	0.658746	-0.411227	0.400212	0.411377	0.000106964	-0.268042	0.0259702	0.0031207	0.00694761	5	deactivated in tumors	TSG	TRUE
HIF1A	SMARCA4	SMARCA4 missense	230	6895	0.189843	0.00838604	0.181457	0.816041	0.698416	0.2583	0.222362	0.259812	0.000107639	0.182643	0.842396	0.560425	0.00282553	3	activated in tumors	TSG	TRUE
ELK1	APC	APC missense	351	6511	0.146309	-0.00414593	0.150455	0.771759	0.71281	0.210151	0.194951	0.211073	0.000107866	0.152494	0.330397	0.070527	0.030709	3	activated in tumors	TSG	TRUE
STAT2	HSPA8	HSPA8 interface BAG2	6	7068	1.32662	0.0021271	1.32449	0.935478	0.830791	1.5941	1.41585	1.59426	0.000108112	1.31391	0.129168	0.00526234	0.00982823	3	activated in tumors	Oncogene	TRUE
RUNX2	HRAS	HRAS 3D hotspot 1-166-1nvx	33	7081	-0.481632	0.00731003	-0.488942	0.710166	0.716573	-0.682361	0.68849	0.682333	0.000108461	-0.483839	0.000225612	0.0840413	0.000979999	4	no differential activity	Oncogene	TRUE
IRF1	TGFBR2	TGFBR2 truncating	43	7035	0.515066	0.00809046	0.506976	0.959402	0.839009	0.603705	0.528429	0.604256	0.000109076	0.497639	0.487201	0.00817133	0.0040344	5	no differential activity	TSG	TRUE
ETS1	HRAS	HRAS interface RASA1	69	7081	0.378249	-4.33748e-05	0.378293	0.636271	0.803825	0.471454	0.594547	0.470616	0.000109207	0.375613	0.630782	0.00321404	0.000979999	4	activated in tumors	Oncogene	TRUE
EGR1	ERCC2	ERCC2 missense	83	7073	0.37188	0.0195823	0.352297	0.763868	0.844572	0.417567	0.461202	0.417131	0.00010955	0.360485	0.00536773	0.190113	0.00206698	4	deactivated in tumors	Oncogene	TRUE
PBX1	RUNX1	RUNX1 truncating	37	7043	0.432557	0.00453893	0.428018	0.618136	0.660775	0.647957	0.692433	0.647751	0.000110103	0.421425	0.0115089	0.0147267	0.0271587	4	deactivated in tumors	TSG	TRUE
CEBPB	FGFR3	FGFR3 interface FGF1 // FGFR3 3D hotspot 150-362-1ry7	23	7059	-0.618187	0.00271475	-0.620902	0.799567	0.780617	-0.795339	0.776548	0.7954	0.000110219	-0.631048	0.00074469	0.815158	0.00459857	5	deactivated in tumors	Oncogene	TRUE
ETS1	ERCC2	ERCC2 missense	83	7073	0.347319	-6.03904e-05	0.347379	0.628138	0.804533	0.432747	0.553031	0.431778	0.000110239	0.342882	0.617825	0.0046579	0.00206698	5	activated in tumors	Oncogene	TRUE
MYC	EGFR	EGFR inframe indel	35	6797	-0.476114	0.0146296	-0.490744	1.0212	0.729126	-0.671453	0.480557	0.673058	0.000110677	-0.479102	0.0698029	0.0112318	0.0243486	2	activated in tumors	Oncogene	TRUE
MYC	STK11	STK11 missense	69	7032	0.339429	0.00203877	0.33739	0.921794	0.73183	0.459732	0.366015	0.461022	0.000111252	0.34328	0.0321979	0.00756899	0.00425486	3	activated in tumors	TSG	TRUE
ATF3	PIK3CA	PIK3CA 3D hotspot 5-1062-3hhm	513	6014	-0.118672	0.0212134	-0.139886	0.793065	0.786821	-0.177675	0.176386	0.177786	0.000112036	-0.140996	0.671119	0.955296	0.00448503	3	no differential activity	Oncogene	TRUE
E2F4	CTNND1	CTNND1 missense	83	7052	0.295436	0.0101598	0.285276	0.686554	0.688929	0.414103	0.415519	0.414087	0.000112051	0.293607	0.000817627	8.90623e-05	0.0382491	3	activated in tumors	TSG	TRUE
GLI2	CASP8	CASP8 missense	92	7006	-0.301558	0.0113521	-0.31291	0.780966	0.751057	-0.41641	0.400671	0.416627	0.000112288	-0.304829	0.00310211	0.679267	0.00694761	5	deactivated in tumors	TSG	TRUE
SPI1	HSPA8	HSPA8 interface BAG3	5	7068	1.3421	0.00499803	1.3371	0.771384	0.771407	1.73332	1.73337	1.73332	0.000112323	1.33301	0.0172248	0.0543836	0.00982823	4	activated in tumors	Oncogene	TRUE
ELK1	KRAS	KRAS p.13	74	6615	0.314318	-0.00211175	0.31643	0.79108	0.711031	0.444453	0.399997	0.44503	0.000113279	0.321584	0.135247	0.199949	0.00399304	4	activated in tumors	Oncogene	TRUE
SP1	HRAS	HRAS interface SOS2	69	7081	-0.330154	0.0152871	-0.345442	0.800847	0.738274	-0.467512	0.431345	0.467904	0.000113391	-0.345249	0.635782	0.329975	0.00101028	3	no differential activity	Oncogene	TRUE
HSF1	TSC1	TSC1 truncating	27	7062	0.530548	0.00880624	0.521742	0.563033	0.694752	0.751449	0.926664	0.750976	0.000113454	0.517332	0.653833	0.269992	0.00638179	3	activated in tumors	TSG	TRUE
FOS	PIK3CA	PIK3CA p.H1047R	208	6014	-0.148927	0.031364	-0.180291	0.775617	0.666294	-0.269003	0.232448	0.270588	0.000113556	-0.184067	0.00465011	0.214097	0.00451113	3	activated in tumors	Oncogene	TRUE
E2F1	FLT3	FLT3 missense	146	6970	0.220444	0.0131964	0.207248	0.571231	0.638016	0.325491	0.36281	0.324832	0.000113636	0.205515	0.030056	0.000546076	0.0426136	4	activated in tumors	Oncogene	TRUE
E2F7	TP53	TP53 interface TP53BP2	568	4377	0.0640258	-0.0438711	0.107897	0.617586	0.63579	0.170257	0.174707	0.169705	0.000113818	0.109043	0.0384572	0.00115896	0.00627059	3	activated in tumors	TSG	TRUE
CEBPA	BRAF	BRAF activitygain	467	6510	0.121466	-0.00148932	0.122955	0.665528	0.686414	0.179486	0.184748	0.179126	0.000114093	0.127713	0.154091	0.382195	0.00147471	4	deactivated in tumors	Oncogene	TRUE
SMAD4	GATA3	GATA3 truncating	107	6972	-0.242741	0.0165114	-0.259253	0.838442	0.749973	-0.345038	0.309208	0.345683	0.00011415	-0.283463	5.92636e-05	0.0152461	0.00293813	3	deactivated in tumors	TSG	TRUE
PPARA	PIK3CA	PIK3CA p.542	145	6014	-0.261193	0.000361781	-0.261554	0.982436	0.773072	-0.335924	0.266231	0.338331	0.000114382	-0.252971	0.0117839	0.230361	0.00451113	4	deactivated in tumors	Oncogene	TRUE
GATA2	TP53	TP53 p.A159P	9	4377	-0.909862	0.0488453	-0.958707	1.18798	0.740599	-1.29265	0.807005	1.2945	0.000114597	-0.955522	0.496705	0.238047	0.00628976	5	activated in tumors	TSG	TRUE
RUNX1	MSH6	MSH6 truncating	61	7000	0.388413	-0.0142124	0.402626	0.74786	0.802111	0.502237	0.53837	0.501958	0.000114674	0.398297	0.298621	0.936671	0.00138719	5	deactivated in tumors	TSG	TRUE
RELA	HRAS	HRAS interface AFDN	28	7081	-0.510033	0.00642155	-0.516454	0.715048	0.707711	-0.729724	0.722265	0.729753	0.000115646	-0.516753	0.402851	0.00143982	0.00102307	3	no differential activity	Oncogene	TRUE
MYC	CASP8	CASP8 missense	92	7006	0.290307	0.00291183	0.287395	0.773358	0.732254	0.39219	0.37162	0.39248	0.000115793	0.296597	0.0261574	0.00307202	0.00694761	2	activated in tumors	TSG	TRUE
ETS1	CIC	CIC truncating	86	6893	0.336496	-0.000155521	0.336651	0.772754	0.804781	0.418514	0.435652	0.418315	0.000116126	0.336394	0.49118	0.00242195	0.00940743	4	activated in tumors	TSG	TRUE
E2F4	SIN3A	SIN3A missense	106	7029	0.266689	0.00963962	0.257049	0.730033	0.688295	0.373115	0.352106	0.373458	0.000116234	0.259531	0.000727394	3.81527e-05	0.0348703	2	activated in tumors	Oncogene	TRUE
NR3C1	FGFR3	FGFR3 interface FGF1 // FGFR3 3D hotspot 150-362-1ry7	23	7059	-0.634745	0.016298	-0.651043	0.7622	0.795924	-0.818076	0.854163	0.81797	0.000116324	-0.641458	0.0797115	0.606288	0.00459857	5	deactivated in tumors	Oncogene	TRUE
TCF3	VHL	VHL missense	192	6853	0.236817	0.0101467	0.22667	0.779491	0.848182	0.267807	0.290792	0.267242	0.000116836	0.23921	0.00839188	0.160931	0.0528041	6	deactivated in tumors	TSG	FALSE
STAT1	NRAS	NRAS missense	221	6936	-0.191402	0.0218279	-0.21323	0.803536	0.799011	-0.266821	0.265364	0.266867	0.000117005	-0.210423	0.8195	0.000323573	0.0028235	4	deactivated in tumors	Oncogene	TRUE
FOXO3	MAP3K1	MAP3K1 truncating	87	6974	0.36222	0.0089106	0.35331	0.910026	0.85241	0.414131	0.388241	0.414483	0.000117014	0.356574	0.901579	0.736607	0.00638257	3	deactivated in tumors	TSG	TRUE
E2F1	ARID1A	ARID1A p.G1465fs // ARID1A p.G1631fs // ARID1A p.G1848fs	27	6602	0.46618	0.0110864	0.455093	0.496368	0.629893	0.723031	0.916847	0.722493	0.000117191	0.467776	0.0231588	0.00201262	0.00690593	1	activated in tumors	TSG	TRUE
MYCN	CDH1	CDH1 truncating	122	6863	-0.267626	0.0234585	-0.291084	0.804233	0.756118	-0.384535	0.36194	0.384972	0.000117348	-0.267795	0.0559017	0.00423909	0.00366712	3	activated in tumors	TSG	TRUE
E2F7	CARD11	CARD11 missense	213	6914	0.17251	0.00833854	0.164171	0.601928	0.626115	0.262502	0.272742	0.262206	0.000118657	0.167574	0.0129963	0.002256	0.00308051	4	activated in tumors	Oncogene	TRUE
ELK1	FBXW7	FBXW7 truncating	97	6806	0.274694	-0.00316762	0.277861	0.795846	0.712314	0.389411	0.349139	0.390083	0.000118918	0.281327	0.444101	0.0313541	0.0237835	4	activated in tumors	TSG	TRUE
GATA3	TP53	TP53 DNA/RNA aff. disabling	467	4377	-0.0592883	0.0722017	-0.13149	0.626147	0.709111	-0.187427	0.209999	0.185429	0.000119012	-0.131153	0.0074972	3.35184e-06	0.00650288	4	deactivated in tumors	TSG	TRUE
E2F4	ALK	ALK missense	183	6955	0.20292	0.00897265	0.193947	0.725761	0.68837	0.281348	0.267233	0.281749	0.000119352	0.198917	0.000698352	0.00013123	0.0268542	2	activated in tumors	Oncogene	TRUE
GABPA	TP53	TP53 interaction disrupting BCL2L1	111	4377	0.223894	-0.0556262	0.279521	0.780086	0.759521	0.367775	0.35832	0.368022	0.00011937	0.281139	0.109444	0.0113273	0.00650288	4	activated in tumors	TSG	TRUE
ATF3	PIK3CA	PIK3CA interaction increasing IRS1	426	6014	-0.129838	0.0212134	-0.151051	0.785526	0.786821	-0.191998	0.192293	0.191977	0.000119635	-0.152891	0.634474	0.839001	0.00468363	3	no differential activity	Oncogene	TRUE
STAT6	BRAF	BRAF p.600	460	6510	0.157856	-0.00308683	0.160943	0.768733	0.787305	0.204737	0.209361	0.204423	0.000119699	0.147001	0.0883878	2.00443e-05	0.00153839	3	deactivated in tumors	Oncogene	TRUE
RUNX2	TP53	TP53 interface PPP1R13L	587	4377	-0.0872393	0.0313844	-0.118624	0.736175	0.701276	-0.168144	0.161135	0.169154	0.000120282	-0.119281	0.122018	0.00786996	0.00650745	3	no differential activity	TSG	TRUE
ATF2	PTEN	PTEN p.130	70	6484	-0.367723	0.0117931	-0.379516	0.811046	0.815942	-0.465156	0.467934	0.465126	0.000120312	-0.37823	0.606898	0.775113	0.0183209	3	deactivated in tumors	TSG	TRUE
MYB	TP53	TP53 p.R273C	105	4377	-0.265929	0.0109398	-0.276869	0.683285	0.745222	-0.372214	0.405202	0.371525	0.000120346	-0.283499	0.198753	0.983112	0.00650745	4	deactivated in tumors	TSG	TRUE
MAX	NR4A2	NR4A2 missense	68	7068	0.360462	0.00156309	0.358899	0.719682	0.773321	0.464393	0.498691	0.4641	0.000120735	0.362011	0.359374	0.000180954	0.00344958	3	activated in tumors	TSG	TRUE
MEF2A	FGFR3	FGFR3 interface FGF8 // FGFR3 3D hotspot 150-357-2fdb	26	7059	-0.658508	-0.00220335	-0.656304	1.21861	0.833246	-0.786069	0.538567	0.787648	0.000120918	-0.63124	0.782037	0.00039397	0.00459857	6	no differential activity	Oncogene	TRUE
TP53	TGFBR2	TGFBR2 truncating	43	7035	0.439901	0.00212416	0.437777	0.61699	0.740558	0.591682	0.709536	0.591144	0.000121032	0.435692	0.793746	0.0845718	0.0040344	3	deactivated in tumors	TSG	TRUE
E2F7	FN1	FN1 missense	223	6911	0.169776	0.00917741	0.160598	0.565977	0.627201	0.256799	0.283754	0.256055	0.000121294	0.164081	0.016385	0.00555288	0.00909708	5	activated in tumors	TSG	TRUE
STAT3	CTNNB1	CTNNB1 hotspot S37	185	6783	-0.194604	0.0139789	-0.208583	0.652185	0.726767	-0.287742	0.319822	0.287001	0.000121523	-0.207714	0.407471	0.0201907	0.00761826	2	deactivated in tumors	Oncogene	TRUE
ATF1	TP53	TP53 DNA/RNA aff. disabling	467	4377	0.10655	-0.0329488	0.139499	0.725002	0.74829	0.186976	0.192412	0.186424	0.000121593	0.13929	1.55054e-06	0.00617846	0.00655065	2	activated in tumors	TSG	TRUE
PBX1	MEN1	MEN1 truncating	36	7065	-0.411458	0.00931063	-0.420769	0.684317	0.66023	-0.63719	0.614874	0.637306	0.000121608	-0.423968	0.0156558	0.00596824	0.00864253	5	deactivated in tumors	TSG	TRUE
VDR	ABL1	ABL1 interface PAG1	5	7040	-1.23977	0.00425723	-1.24403	1.21651	0.724481	-1.71624	1.02262	1.71713	0.000121854	-1.24626	0.536693	0.00853863	0.0304701	3	deactivated in tumors	Oncogene	TRUE
ZEB1	BRAF	BRAF interaction disrupting MAP2K1	469	6510	0.106759	-0.00872728	0.115487	0.709804	0.620591	0.184197	0.162702	0.186091	0.000122173	0.11607	0.483916	0.0550252	0.00156131	4	no differential activity	Oncogene	TRUE
MEF2A	FGFR3	FGFR3 p.S249C // FGFR3 p.249	19	7059	-0.76316	-0.00220335	-0.760957	1.07663	0.833246	-0.912467	0.706796	0.913244	0.000122629	-0.736316	0.735284	0.000347334	0.00459857	6	no differential activity	Oncogene	TRUE
NRF1	TP53	TP53 p.R273L	20	4377	0.558696	-0.104357	0.663053	0.845954	0.739101	0.896507	0.783793	0.897107	0.000122672	0.634663	0.00420298	3.60481e-09	0.00658445	6	activated in tumors	TSG	TRUE
TP53	APAF1	APAF1 p.K589fs // APAF1 p.K600fs	9	7044	0.946712	0.00576169	0.940951	0.60876	0.740103	1.27161	1.54569	1.27138	0.000122801	0.948655	0.712236	0.0885853	0.0460505	1	deactivated in tumors	TSG	TRUE
STAT2	HRAS	HRAS p.13	21	7081	0.701621	0.002042	0.699579	1.09341	0.830046	0.841948	0.639815	0.842819	0.000122889	0.697731	0.213446	0.00426465	0.00107948	3	activated in tumors	Oncogene	TRUE
NR1I2	CTNNB1	CTNNB1 p.33	39	6783	0.464296	-0.00791801	0.472214	0.784019	0.765932	0.61644	0.602299	0.616522	0.000123149	0.47273	0.740143	0.960484	0.00761858	2	deactivated in tumors	Oncogene	TRUE
E2F1	TP53	TP53 hotspot T211	99	4377	0.193201	-0.0480138	0.241215	0.65021	0.62954	0.38288	0.370979	0.38316	0.000123197	0.245465	0.0588307	4.81795e-07	0.00658845	2	activated in tumors	TSG	TRUE
ATF3	PIK3CA	PIK3CA 3D hotspot 5-1062-3hiz	519	6014	-0.116975	0.0212134	-0.138189	0.802602	0.786821	-0.175348	0.172176	0.175629	0.000123746	-0.139478	0.678216	0.912138	0.00480844	3	no differential activity	Oncogene	TRUE
E2F7	EGFR	EGFR inframe indel	35	6797	-0.401682	0.0151469	-0.416828	0.751637	0.624181	-0.667053	0.554561	0.6678	0.000124064	-0.406626	0.0361384	0.0109893	0.0259941	3	activated in tumors	Oncogene	TRUE
MYCN	PIK3CA	PIK3CA p.1047	246	6014	-0.170429	0.0285254	-0.198954	0.87856	0.742983	-0.265714	0.226454	0.267777	0.00012463	-0.188748	0.0333804	0.274238	0.00480844	3	activated in tumors	Oncogene	TRUE
FOS	TP53	TP53 p.248	155	4377	0.150137	-0.0542338	0.204371	0.632719	0.659863	0.310142	0.323004	0.309717	0.000124751	0.206803	0.0263142	0.0307256	0.006634	2	activated in tumors	TSG	TRUE
MYB	TP53	TP53 interface TP53BP2	568	4377	-0.11755	0.0109398	-0.12849	0.782081	0.745222	-0.171425	0.164293	0.172418	0.000124958	-0.128388	0.876333	0.66022	0.006634	4	deactivated in tumors	TSG	TRUE
E2F4	CIC	CIC p.A1114fs	10	6893	0.829674	0.0101719	0.819502	0.634328	0.690213	1.18744	1.29192	1.18732	0.000125432	0.836558	0.00014983	2.39593e-05	0.00940743	3	activated in tumors	TSG	TRUE
HIF1A	KRAS	KRAS p.13	74	6615	0.315342	0.00291039	0.312431	0.888101	0.694282	0.448452	0.351797	0.450006	0.000125596	0.312694	0.590076	0.483836	0.00432881	4	activated in tumors	Oncogene	TRUE
MYB	TP53	TP53 hotspot S269	348	4377	-0.148979	0.0109398	-0.159919	0.829445	0.745222	-0.212734	0.192802	0.214592	0.000125954	-0.160693	0.217384	0.867752	0.00666266	4	deactivated in tumors	TSG	TRUE
JUND	SETD2	SETD2 missense	205	6852	0.16003	-0.00159092	0.161621	0.604837	0.602381	0.268272	0.267214	0.268304	0.000126317	0.163799	0.0268796	0.0928688	0.00757902	3	deactivated in tumors	TSG	TRUE
PPARA	ERBB2	ERBB2 interface MATK	22	6995	-0.654011	-0.00528824	-0.648723	1.29437	0.788851	-0.820289	0.501188	0.822365	0.00012653	-0.647666	0.106316	0.301638	0.0643938	4	deactivated in tumors	Oncogene	FALSE
ETS1	CTNNB1	CTNNB1 hotspot S33	155	6783	0.242567	-0.00713745	0.249705	0.705893	0.804624	0.311134	0.353743	0.310337	0.000126583	0.249999	0.603454	0.00899182	0.00772935	4	activated in tumors	Oncogene	TRUE
ETS1	CTNNB1	CTNNB1 interface FBXW11	155	6783	0.242567	-0.00713745	0.249705	0.705893	0.804624	0.311134	0.353743	0.310337	0.000126583	0.249999	0.603454	0.00899182	0.00772935	4	activated in tumors	Oncogene	TRUE
PAX6	JAK3	JAK3 missense	123	7027	-0.247571	0.0113691	-0.25894	0.809115	0.719078	-0.359285	0.320028	0.3601	0.000127168	-0.251502	0.0241153	0.312169	0.0476879	3	deactivated in tumors	Oncogene	TRUE
MYB	PTEN	PTEN p.130	70	6484	0.324594	-0.0190827	0.343676	0.829196	0.759847	0.451843	0.41447	0.452297	0.000127187	0.351263	0.234733	0.153421	0.0183209	4	deactivated in tumors	TSG	TRUE
RUNX2	HRAS	HRAS 3D hotspot 5-163-4lwz // HRAS p.61	27	7081	-0.533273	0.00731003	-0.540583	0.673824	0.716573	-0.75456	0.802262	0.754401	0.000127603	-0.529147	0.000231981	0.0894218	0.00111305	4	no differential activity	Oncogene	TRUE
HNF1A	BRAF	BRAF hotspot S602	483	6510	-0.09208	0.00732942	-0.0994094	0.503529	0.506112	-0.196487	0.197425	0.196418	0.000127761	-0.0921351	0.0264083	0.286305	0.00162355	4	deactivated in tumors	Oncogene	TRUE
SMAD4	MSH6	MSH6 truncating	61	7000	-0.364555	0.0167787	-0.381334	0.7807	0.750892	-0.507667	0.488451	0.507841	0.000128175	-0.370106	0.000297216	0.0347743	0.00149088	4	deactivated in tumors	TSG	TRUE
VDR	BRAF	BRAF interaction increasing MAP2K1 // BRAF p.V600E	457	6510	0.132868	-0.0067963	0.139664	0.662066	0.724949	0.193709	0.210952	0.192654	0.000128804	0.134782	0.691804	0.0169859	0.00162766	3	deactivated in tumors	Oncogene	TRUE
NRF1	TP53	TP53 p.220	60	4377	0.25431	-0.104357	0.358668	0.91357	0.739101	0.483581	0.3926	0.485275	0.00012912	0.367764	0.00421013	2.30743e-09	0.00680548	6	activated in tumors	TSG	TRUE
JUN	GATA3	GATA3 truncating	107	6972	-0.235376	0.0134387	-0.248815	0.769061	0.715824	-0.347192	0.323531	0.347593	0.000129372	-0.268475	0.270817	0.00703926	0.00319117	2	deactivated in tumors	TSG	TRUE
RUNX1	NCOR1	NCOR1 missense	198	6906	0.208803	-0.0155286	0.224332	0.87147	0.800432	0.279546	0.257418	0.280264	0.000129415	0.221696	0.204837	0.864203	0.0326893	3	deactivated in tumors	TSG	TRUE
FOS	TP53	TP53 p.273	215	4377	0.122803	-0.0542338	0.177037	0.630139	0.659863	0.268846	0.280949	0.268293	0.000130625	0.176205	0.114995	0.0653264	0.00686004	2	activated in tumors	TSG	TRUE
HIF1A	MSH6	MSH6 truncating	61	7000	0.354133	0.00956188	0.344572	0.814762	0.701195	0.490677	0.42291	0.491406	0.000131198	0.345926	0.654225	0.822315	0.00149088	3	activated in tumors	TSG	TRUE
MYCN	EP300	EP300 interface HIF1A	5	6892	1.30832	0.00891907	1.2994	1.2537	0.760257	1.7083	1.03645	1.70916	0.000131386	1.30083	0.0431655	0.000591342	0.00915011	2	activated in tumors	TSG	TRUE
HIF1A	PTEN	PTEN p.R130Q	34	6484	0.45963	0.00308346	0.456547	0.907012	0.690557	0.659917	0.503352	0.661128	0.000131388	0.455383	0.537948	0.783316	0.0183209	2	activated in tumors	TSG	TRUE
MYCN	PDGFRA	PDGFRA missense	204	6938	0.215898	0.00841497	0.207483	0.75705	0.760124	0.27299	0.274067	0.272959	0.000132341	0.206529	0.073477	0.00125249	0.00850765	4	activated in tumors	Oncogene	TRUE
ATF4	TP53	TP53 p.273	215	4377	0.0840405	-0.124476	0.208517	0.71325	0.818415	0.256222	0.292347	0.254781	0.000132491	0.217118	0.235581	2.23479e-06	0.00693309	3	activated in tumors	TSG	TRUE
MYCN	CTNNB1	CTNNB1 hotspot S37	185	6783	0.219316	0.00674136	0.212574	0.735982	0.757359	0.280885	0.288831	0.280678	0.000132659	0.215502	0.0870532	0.000379351	0.00796434	3	activated in tumors	Oncogene	TRUE
ZEB1	CTNNB1	CTNNB1 CSNK2A1 phosphorylation loss	113	6783	0.22048	-0.00749056	0.22797	0.737989	0.625018	0.36358	0.308907	0.364742	0.000133819	0.227303	0.597746	0.152061	0.00796434	4	no differential activity	Oncogene	TRUE
E2F1	PTEN	PTEN p.L265fs	15	6484	0.620633	0.0144529	0.60618	0.491588	0.631497	0.960317	1.2331	0.959909	0.000133965	0.62332	0.0116441	0.0084156	0.0183209	2	activated in tumors	TSG	TRUE
MYC	MEN1	MEN1 truncating	36	7065	0.466719	0.00640644	0.460312	0.728536	0.733639	0.627458	0.631832	0.627437	0.000134439	0.468054	0.0400943	0.00480135	0.00864253	3	activated in tumors	TSG	TRUE
HIF1A	KRAS	KRAS interaction decreasing RASSF2 // KRAS interaction disrupting RASSF2 // KRAS p.G12V	112	6615	0.254291	0.00291039	0.25138	0.716283	0.694282	0.36188	0.350951	0.362072	0.000134634	0.253298	0.457726	0.831904	0.00453369	4	activated in tumors	Oncogene	TRUE
RUNX2	FGFR3	FGFR3 interface FGF1 // FGFR3 3D hotspot 150-362-1ry7	23	7059	-0.561669	0.00602159	-0.56769	0.732012	0.714987	-0.793928	0.775521	0.793987	0.000135121	-0.570282	0.000112199	0.104415	0.00477098	5	no differential activity	Oncogene	TRUE
PAX6	HRAS	HRAS 3D hotspot 5-163-4lwz // HRAS p.61	27	7081	-0.511356	0.0108213	-0.522177	0.661353	0.721289	-0.724161	0.789559	0.72395	0.000135235	-0.530926	0.017605	0.273949	0.00117143	4	deactivated in tumors	Oncogene	TRUE
FOXM1	TP53	TP53 PTM ubiquitination loss	40	4377	0.24913	-0.0786171	0.327747	0.481128	0.571004	0.574721	0.681205	0.573984	0.000135481	0.344087	0.0079346	4.34308e-12	0.00703659	2	activated in tumors	TSG	TRUE
CREB1	TP53	TP53 missense	1991	4377	0.0583236	-0.0279068	0.0862304	0.823405	0.874831	0.100375	0.104724	0.0985681	0.000135496	0.08877	0.0124371	0.0876097	0.00703659	2	activated in tumors	TSG	TRUE
MYB	TP53	TP53 interaction disrupting NRDC	115	4377	-0.252649	0.0109398	-0.263589	0.718894	0.745222	-0.354017	0.366659	0.353705	0.000135915	-0.269299	0.230001	0.92234	0.00703659	4	deactivated in tumors	TSG	TRUE
JUND	NRAS	NRAS p.Q61R	82	6936	-0.240951	0.00875333	-0.249704	0.694762	0.602023	-0.413982	0.359409	0.414775	0.000136073	-0.256042	0.0448173	0.0516236	0.00320155	4	deactivated in tumors	Oncogene	TRUE
MYC	MAP3K1	MAP3K1 truncating	87	6974	-0.31516	0.0107251	-0.325885	0.732618	0.732761	-0.444736	0.444822	0.444735	0.000136291	-0.303067	0.029866	0.0167303	0.00681454	2	activated in tumors	TSG	TRUE
RUNX2	TP53	TP53 3D hotspot 97-291-4a63	494	4377	-0.0954607	0.0313844	-0.126845	0.741629	0.701276	-0.179803	0.171036	0.180877	0.000136482	-0.127752	0.145528	0.011107	0.007041	3	no differential activity	TSG	TRUE
PAX6	EGFR	EGFR activitygain	33	6797	0.477822	0.0052277	0.472594	0.765404	0.719447	0.656682	0.617444	0.656885	0.000136643	0.479523	0.0215242	0.482686	0.0273284	4	deactivated in tumors	Oncogene	TRUE
MYCN	MLLT4	MLLT4 missense	126	7002	0.267586	0.00982563	0.25776	0.909917	0.756942	0.339207	0.283279	0.340528	0.000136805	0.260446	0.0926404	0.000654841	0.00342013	4	activated in tumors	TSG	TRUE
MYC	KRAS	KRAS p.G13D	62	6615	0.344918	-0.00241666	0.347334	0.727295	0.732778	0.474029	0.47757	0.473997	0.000137386	0.35655	0.00728826	0.0142022	0.00453369	3	activated in tumors	Oncogene	TRUE
EZH2	HRAS	HRAS 3D hotspot 1-166-1nvw	57	7081	-0.411212	0.00343151	-0.414644	0.716442	0.815861	-0.508685	0.578754	0.508228	0.00013743	-0.413515	0.107183	0.739641	0.00117421	5	activated in tumors	Oncogene	TRUE
IRF1	HRAS	HRAS 3D hotspot 5-164-1nvw	29	7081	-0.580313	0.012042	-0.592355	0.716628	0.837509	-0.707655	0.826586	0.707281	0.000137438	-0.594114	0.591196	0.0105784	0.00117421	4	no differential activity	Oncogene	TRUE
ETS1	STK11	STK11 missense	69	7032	0.369292	-0.00292941	0.372222	0.92787	0.800686	0.464117	0.401157	0.464879	0.000137537	0.370177	0.689409	0.00674167	0.0048881	4	activated in tumors	TSG	TRUE
FOXM1	CTNNB1	CTNNB1 hotspot S29	117	6783	-0.19012	0.0154666	-0.205587	0.574037	0.576352	-0.356728	0.358143	0.356704	0.000137795	-0.204712	0.0208887	2.58992e-05	0.00809847	2	activated in tumors	Oncogene	TRUE
PAX6	TRIO	TRIO missense	222	6905	-0.180075	0.0144504	-0.194525	0.84197	0.715764	-0.27017	0.231036	0.271773	0.000137933	-0.187513	0.0313316	0.293086	0.00646559	4	deactivated in tumors	Oncogene	TRUE
EGR1	PBRM1	PBRM1 truncating	183	6866	0.246215	0.0189106	0.227304	0.949811	0.840394	0.26951	0.239315	0.270473	0.000138025	0.241449	0.0050846	0.140065	0.00621114	3	deactivated in tumors	TSG	TRUE
ZEB1	TP53	TP53 3D hotspot 97-287-1ycs	581	4377	-0.0804659	0.0244498	-0.104916	0.666466	0.619732	-0.167763	0.157421	0.169292	0.000138576	-0.105277	0.305093	0.0167426	0.00712385	3	no differential activity	TSG	TRUE
STAT1	STK11	STK11 p.G279fs	6	7032	-1.24695	0.0185629	-1.26551	0.529364	0.798938	-1.5843	2.39062	1.58399	0.000139982	-1.24252	0.944966	0.000729169	0.0048881	3	deactivated in tumors	TSG	TRUE
RUNX1	TJP2	TJP2 missense	90	7058	0.313109	-0.0142545	0.327364	0.857809	0.801049	0.408296	0.381628	0.408669	0.000140083	0.324239	0.177237	0.981532	0.0210125	4	deactivated in tumors	Oncogene	TRUE
ELK1	HRAS	HRAS interface RIN1	47	7081	0.401287	0.000784534	0.400503	0.705036	0.715323	0.559942	0.56806	0.559891	0.000140112	0.398802	0.353479	0.0617925	0.00118891	3	activated in tumors	Oncogene	TRUE
PPARG	CTNNB1	CTNNB1 missense	354	6783	0.161343	0.00505422	0.156289	0.708603	0.751366	0.208578	0.220559	0.208006	0.000140471	0.155873	0.474645	0.170618	0.0081538	2	deactivated in tumors	Oncogene	TRUE
VDR	KEAP1	KEAP1 interface KEAP1	36	6941	-0.446435	0.0154789	-0.461914	0.996097	0.718097	-0.641762	0.463724	0.643248	0.000140685	-0.458232	0.692439	0.0685295	0.002261	4	deactivated in tumors	Oncogene	TRUE
E2F7	TP53	TP53 interface PPP1R13L	587	4377	0.061051	-0.0438711	0.104922	0.607008	0.63579	0.165895	0.172851	0.165026	0.000141003	0.105788	0.0315084	0.00137675	0.00722103	3	activated in tumors	TSG	TRUE
E2F1	NR4A2	NR4A2 p.N231fs // NR4A2 p.N294fs	5	7068	1.07472	0.0123735	1.06235	0.229084	0.634472	1.6748	4.63738	1.67438	0.000141067	1.07972	0.0216931	0.000236687	0.00384729	3	activated in tumors	TSG	TRUE
IRF1	HRAS	HRAS interface AFDN	28	7081	-0.59075	0.012042	-0.602792	0.727531	0.837509	-0.720079	0.828545	0.719743	0.000141338	-0.603553	0.595055	0.0106926	0.00118943	4	no differential activity	Oncogene	TRUE
STAT3	TGFBR2	TGFBR2 truncating	43	7035	0.427215	0.00572347	0.421492	0.535395	0.723987	0.582966	0.787254	0.582181	0.00014135	0.421408	0.333731	0.0175235	0.0042405	2	deactivated in tumors	TSG	TRUE
JUND	FGFR3	FGFR3 p.S249C // FGFR3 p.249	19	7059	-0.536375	0.0055655	-0.54194	0.41299	0.602442	-0.900179	1.31224	0.899572	0.000141362	-0.526873	0.0297647	0.0806995	0.00477098	4	deactivated in tumors	Oncogene	TRUE
ESR1	SMARCA4	SMARCA4 truncating	30	6895	-0.496629	0.0257619	-0.52239	0.913096	0.745722	-0.699785	0.572109	0.700516	0.000141455	-0.519972	0.334732	0.0341462	0.00353637	3	deactivated in tumors	TSG	TRUE
ATF4	TP53	TP53 PTM ubiquitination loss	40	4377	0.355251	-0.124476	0.479727	0.857276	0.818415	0.585914	0.559595	0.586166	0.000141456	0.494079	0.347024	3.61648e-07	0.00722103	3	activated in tumors	TSG	TRUE
PBX1	AXIN1	AXIN1 truncating	33	7061	-0.434528	0.0101858	-0.444714	0.649192	0.660257	-0.673597	0.685027	0.673547	0.000141651	-0.438338	0.020186	0.0128822	0.00637427	4	deactivated in tumors	TSG	TRUE
LEF1	PIK3CA	PIK3CA missense	1097	6014	0.106836	0.00113585	0.1057	0.830323	0.777714	0.13447	0.1273	0.135912	0.000141703	0.0995216	0.291224	0.0218238	0.00540173	4	deactivated in tumors	Oncogene	TRUE
ATF1	PIK3CA	PIK3CA p.542	145	6014	-0.222947	0.0317049	-0.254652	0.788887	0.757201	-0.335971	0.322799	0.336307	0.000142036	-0.242575	5.63574e-06	0.191499	0.00540173	4	activated in tumors	Oncogene	TRUE
IRF1	HRAS	HRAS 3D hotspot 1-166-1nvx	33	7081	-0.540726	0.012042	-0.552768	0.733093	0.837509	-0.660361	0.754022	0.660014	0.00014208	-0.555884	0.585688	0.00936108	0.00118943	4	no differential activity	Oncogene	TRUE
PAX6	TP53	TP53 missense	1991	4377	-0.0404963	0.0369214	-0.0774177	0.690766	0.72796	-0.108044	0.112075	0.106349	0.000142202	-0.0737935	0.00238122	0.169108	0.00723383	4	deactivated in tumors	TSG	TRUE
MYB	TP53	TP53 interface PPP1R13L	587	4377	-0.114764	0.0109398	-0.125704	0.785967	0.745222	-0.167572	0.159935	0.16868	0.000142879	-0.125542	0.725493	0.565083	0.00724304	4	deactivated in tumors	TSG	TRUE
SP1	HRAS	HRAS 3D hotspot 1-166-4nyj	69	7081	-0.325278	0.0152871	-0.340565	0.803256	0.738274	-0.460896	0.42398	0.461299	0.0001433	-0.34011	0.635245	0.336092	0.00119125	3	no differential activity	Oncogene	TRUE
MEF2A	PIK3CA	PIK3CA activitygain	599	6014	-0.111728	0.00261441	-0.114342	0.908517	0.830126	-0.136525	0.125856	0.13774	0.000143416	-0.138014	0.453548	1.90782e-05	0.00541552	5	no differential activity	Oncogene	TRUE
NRF1	TP53	TP53 interface TP63	161	4377	0.122677	-0.104357	0.227034	0.810485	0.739101	0.306085	0.280121	0.307176	0.00014389	0.225754	0.00563069	5.35982e-09	0.00726905	6	activated in tumors	TSG	TRUE
SP1	HRAS	HRAS p.Q61R	15	7081	-0.712417	0.0152871	-0.727704	0.757362	0.738274	-0.985632	0.96084	0.985683	0.000144208	-0.726155	0.775239	0.309531	0.00119125	3	no differential activity	Oncogene	TRUE
TP53	KRAS	KRAS p.61	23	6615	0.578287	-0.00509524	0.583383	0.975113	0.737242	0.790323	0.598272	0.791305	0.000144574	0.586444	0.446841	0.119634	0.00467149	3	deactivated in tumors	Oncogene	TRUE
RELA	CTNNB1	CTNNB1 hotspot S29	117	6783	-0.239258	0.0122758	-0.251534	0.561617	0.711848	-0.354481	0.447875	0.353354	0.000145134	-0.251425	0.322715	0.00241201	0.00823072	2	no differential activity	Oncogene	TRUE
ATF4	PIK3CA	PIK3CA p.E547G	5	6014	-1.37345	0.0109602	-1.38442	0.475616	0.815221	-1.69858	2.91078	1.69821	0.000145146	-1.38624	0.11366	0.669616	0.00544226	4	activated in tumors	Oncogene	TRUE
TCF4	CTNNB1	CTNNB1 hotspot S29	117	6783	0.291011	0.0176285	0.273382	0.711213	0.788383	0.347307	0.384389	0.346763	0.000145297	0.278825	0.000414037	0.545027	0.00823072	2	deactivated in tumors	Oncogene	TRUE
STAT6	KEAP1	KEAP1 truncating	35	6941	-0.508035	0.0177739	-0.525809	0.779377	0.787215	-0.667968	0.674653	0.667936	0.00014547	-0.506578	0.0518564	3.07818e-05	0.00228354	4	deactivated in tumors	Oncogene	TRUE
SP1	HRAS	HRAS interface RASGRF1 // HRAS 3D hotspot 1-166-1xd2 // HRAS 3D hotspot 1-166-4nyi	70	7081	-0.322139	0.0152871	-0.337426	0.797846	0.738274	-0.456677	0.422921	0.457047	0.000146751	-0.337149	0.63305	0.334249	0.00120428	3	no differential activity	Oncogene	TRUE
ESR1	KRAS	KRAS p.12	371	6615	0.162792	0.0130711	0.149721	0.692789	0.747824	0.200964	0.216113	0.200208	0.00014781	0.151571	0.237236	0.0580869	0.00467857	2	deactivated in tumors	Oncogene	TRUE
STAT2	CTCF	CTCF missense	93	7006	0.333397	-0.00188708	0.335284	0.931461	0.828702	0.403901	0.359955	0.40459	0.000148096	0.32891	0.191834	0.00730981	0.00828304	6	activated in tumors	TSG	TRUE
STAT1	HRAS	HRAS p.Q61R	15	7081	-0.763678	0.0166021	-0.78028	0.502737	0.799186	-0.976926	1.55206	0.976343	0.000148152	-0.783492	0.732022	0.000282694	0.00120784	2	deactivated in tumors	Oncogene	TRUE
E2F6	HIF1A	HIF1A missense	52	7094	0.434133	0.00824923	0.425884	0.79119	0.807686	0.527365	0.538282	0.527288	0.000148533	0.42661	0.509369	0.120777	0.0303095	2	activated in tumors	Oncogene	TRUE
FOXM1	CTNNB1	CTNNB1 interface BTRC	80	6783	-0.23049	0.0154666	-0.245956	0.551648	0.576352	-0.426953	0.445858	0.426747	0.000148643	-0.245593	0.0202298	6.39329e-05	0.00832001	2	activated in tumors	Oncogene	TRUE
SOX2	EGFR	EGFR interface RAF1	18	6797	0.63931	-0.0115911	0.650901	0.817795	0.734784	0.885577	0.795922	0.88584	0.000149796	0.657957	0.158609	0.0123281	0.0274711	4	deactivated in tumors	Oncogene	TRUE
HNF1A	BRAF	BRAF interaction disrupting MAP2K1	469	6510	-0.0923931	0.00732942	-0.0997225	0.496886	0.506112	-0.197276	0.200695	0.197036	0.00015019	-0.0923232	0.0234238	0.286197	0.00188735	4	deactivated in tumors	Oncogene	TRUE
FOXM1	EGFR	EGFR interaction decreasing LAT // EGFR interaction decreasing ACTN4 // EGFR interaction decreasing ABL1 // EGFR interaction decreasing TGFA // EGFR interaction decreasing RAF1 // EGFR interaction decreasing NR3C1 // EGFR interaction decreasing ITGB2 // EGFR interaction decreasing RET // EGFR interaction decreasing HSP90AB1 // EGFR interaction decreasing FGR // EGFR interaction decreasing PIM1 //…	22	6797	-0.472335	0.0129382	-0.485273	0.575903	0.576523	-0.841727	0.842631	0.841724	0.000150887	-0.466538	0.0281414	9.06019e-05	0.0274711	2	activated in tumors	Oncogene	TRUE
ELK1	CARD11	CARD11 truncating	35	6914	0.449481	-0.00147902	0.450961	0.657621	0.711889	0.633698	0.685746	0.63347	0.000151282	0.457387	0.312462	0.0747179	0.00378206	4	activated in tumors	Oncogene	TRUE
ATF1	STK11	STK11 truncating	61	7032	0.389496	0.0160265	0.373469	1.13473	0.759235	0.489355	0.329126	0.491902	0.000151304	0.371454	3.18722e-06	0.00384014	0.00491853	2	activated in tumors	TSG	TRUE
E2F7	CREBBP	CREBBP missense	282	6820	0.145694	0.00781767	0.137876	0.610782	0.626233	0.22038	0.225736	0.220167	0.000151304	0.144442	0.0138243	0.00258264	0.0161024	3	activated in tumors	TSG	TRUE
E2F1	TP53	TP53 p.R249S	23	4377	0.455902	-0.0480138	0.503916	0.58879	0.62954	0.800702	0.855851	0.800451	0.000152305	0.49725	0.0415945	4.29954e-07	0.00766764	2	activated in tumors	TSG	TRUE
CEBPA	BRAF	BRAF hotspot S602	483	6510	0.117088	-0.00148932	0.118577	0.66138	0.686414	0.173177	0.179288	0.172749	0.000152435	0.123302	0.155112	0.384427	0.00190499	4	deactivated in tumors	Oncogene	TRUE
STAT2	STK11	STK11 truncating	61	7032	-0.403829	0.00637392	-0.410203	0.93787	0.830861	-0.493137	0.437378	0.493709	0.000153101	-0.40514	0.181272	0.00975452	0.00491853	4	activated in tumors	TSG	TRUE
NRF1	PIK3CA	PIK3CA interaction increasing PIK3R1 // PIK3CA p.E545K	219	6014	-0.205592	0.016687	-0.222279	0.798717	0.773603	-0.286998	0.278295	0.287329	0.000153881	-0.202421	0.00853623	0.00141118	0.00572943	5	activated in tumors	Oncogene	TRUE
STAT6	BRAF	BRAF hotspot T599	494	6510	0.148295	-0.00308683	0.151382	0.775624	0.787305	0.192478	0.195174	0.192279	0.000153958	0.139803	0.102752	1.68427e-05	0.00191345	3	deactivated in tumors	Oncogene	TRUE
RELA	CTNNB1	CTNNB1 interface BTRC	80	6783	-0.29068	0.0122758	-0.302956	0.584529	0.711848	-0.426391	0.51829	0.425591	0.000154457	-0.302389	0.321115	0.00307976	0.00849174	2	no differential activity	Oncogene	TRUE
RARA	GATA3	GATA3 p.N333fs // GATA3 p.N334fs	10	6972	-0.914574	0.000416306	-0.914991	0.672343	0.777575	-1.17691	1.3609	1.17672	0.000155106	-0.931907	0.412556	0.154116	0.00367292	2	deactivated in tumors	TSG	TRUE
CEBPA	BRAF	BRAF interaction disrupting MAP2K1	469	6510	0.118743	-0.00148932	0.120233	0.655431	0.686414	0.175681	0.183441	0.17516	0.00015515	0.124763	0.165718	0.41827	0.00191773	4	deactivated in tumors	Oncogene	TRUE
NFKB1	CTNNB1	CTNNB1 hotspot S33	155	6783	-0.214064	0.0155187	-0.229583	0.59909	0.756029	-0.304931	0.383219	0.303669	0.000155323	-0.23138	0.560034	0.0016819	0.00849174	2	no differential activity	Oncogene	TRUE
NFKB1	CTNNB1	CTNNB1 interface FBXW11	155	6783	-0.214064	0.0155187	-0.229583	0.59909	0.756029	-0.304931	0.383219	0.303669	0.000155323	-0.23138	0.560034	0.0016819	0.00849174	2	no differential activity	Oncogene	TRUE
STAT2	FBXW7	FBXW7 interaction decreasing SKP1 // FBXW7 p.R465C	28	6806	0.593314	-0.0010327	0.594347	1.06928	0.820633	0.723258	0.555839	0.724255	0.000155618	0.5889	0.347634	0.0410547	0.0244909	3	activated in tumors	TSG	TRUE
MYCN	NCOR2	NCOR2 missense	99	6980	0.300832	0.00924684	0.291585	0.732618	0.760851	0.383428	0.398004	0.383235	0.00015573	0.291201	0.0622409	0.000924657	0.010382	3	activated in tumors	Oncogene	TRUE
SMAD4	HRAS	HRAS 3D hotspot 5-164-1bkd	53	7081	-0.378712	0.014129	-0.392841	0.697541	0.752066	-0.522615	0.563179	0.522349	0.000156075	-0.391593	9.87491e-05	0.0363716	0.00125586	3	deactivated in tumors	Oncogene	TRUE
CREB1	EGFR	EGFR interface PTK2	12	6797	0.949756	0.0137291	0.936027	0.859033	0.859147	1.08948	1.08963	1.08948	0.000156087	0.938774	0.0131673	0.196807	0.0274711	2	activated in tumors	Oncogene	TRUE
STAT2	EP300	EP300 p.D1399N	12	6892	0.898416	-0.000896262	0.899312	0.769369	0.824278	1.09114	1.1689	1.09103	0.000156091	0.900557	0.156552	0.0075683	0.0101459	3	activated in tumors	TSG	TRUE
BACH1	HRAS	HRAS interface RASGRF1 // HRAS 3D hotspot 1-166-1xd2 // HRAS 3D hotspot 1-166-4nyi	70	7081	-0.317782	0.0261146	-0.343897	0.828724	0.753897	-0.455701	0.414972	0.456159	0.000156762	-0.34279	0.0450098	0.735019	0.00125586	4	no differential activity	Oncogene	TRUE
SP1	HRAS	HRAS 3D hotspot 1-166-1nvw	57	7081	-0.356165	0.0152871	-0.371452	0.874099	0.738274	-0.502344	0.424954	0.503135	0.00015772	-0.371799	0.704407	0.356475	0.00125586	3	no differential activity	Oncogene	TRUE
GABPA	HRAS	HRAS interface NF1	70	7081	0.355525	-0.00174969	0.357274	0.668967	0.783918	0.456354	0.534069	0.455755	0.00015807	0.355415	0.379567	0.0614688	0.00125586	4	activated in tumors	Oncogene	TRUE
PPARD	TP53	TP53 3D hotspot 97-287-1ycs	581	4377	-0.068282	0.0449838	-0.113266	0.658865	0.684973	-0.166086	0.17191	0.165358	0.000158162	-0.113716	0.197357	0.000207496	0.00793377	4	deactivated in tumors	TSG	TRUE
GATA3	BRAF	BRAF hotspot T599	494	6510	0.146951	0.0162078	0.130744	0.653465	0.703904	0.186651	0.200077	0.185741	0.000158176	0.124441	0.236787	0.0651453	0.0019445	4	deactivated in tumors	Oncogene	TRUE
E2F4	PLCG1	PLCG1 missense	103	7047	0.264349	0.00952674	0.254823	0.775978	0.688123	0.3696	0.328389	0.370316	0.000158323	0.258273	0.000960822	0.000102523	0.0178114	2	activated in tumors	Oncogene	TRUE
MAX	KEAP1	KEAP1 interface KEAP1	36	6941	0.489354	-0.00543532	0.494789	0.816145	0.771036	0.641526	0.606252	0.64172	0.000158395	0.486899	0.374321	0.000586886	0.00242992	4	activated in tumors	Oncogene	TRUE
ATF4	TP53	TP53 p.R209fs // TP53 p.R77fs	8	4377	0.962167	-0.124476	1.08664	1.37155	0.818415	1.32583	0.792273	1.32774	0.000158679	1.09356	0.349738	4.26841e-07	0.00793377	3	activated in tumors	TSG	TRUE
ATF2	NRAS	NRAS p.61	159	6936	0.246783	0.00241021	0.244372	0.817893	0.816728	0.2992	0.298783	0.299209	0.000158851	0.247929	0.209079	0.677759	0.00364632	3	deactivated in tumors	Oncogene	TRUE
MYCN	RB1	RB1 truncating	155	6859	0.233576	0.00728258	0.226293	0.758664	0.760869	0.297433	0.298279	0.297414	0.000158854	0.233482	0.081745	0.00101447	0.0081909	2	activated in tumors	TSG	TRUE
NFKB1	HSPA8	HSPA8 interface BAG3	5	7068	1.28315	0.00768093	1.27547	0.575751	0.752188	1.69588	2.21531	1.69568	0.00015928	1.27043	0.515517	0.000984622	0.0118321	3	no differential activity	Oncogene	TRUE
REL	FGFR3	FGFR3 interface FGF8 // FGFR3 3D hotspot 150-357-2fdb	26	7059	-0.620583	-0.000967097	-0.619616	1.13973	0.814906	-0.759073	0.543653	0.760352	0.000159899	-0.606239	0.157019	0.0120841	0.0051396	6	deactivated in tumors	Oncogene	TRUE
VDR	FBXW7	FBXW7 truncating	97	6806	-0.27284	0.00949926	-0.282339	0.819608	0.722852	-0.389817	0.344481	0.39059	0.000160294	-0.280054	0.515576	0.0151582	0.0244909	4	deactivated in tumors	TSG	TRUE
GABPA	HRAS	HRAS 3D hotspot 5-164-1bkd	53	7081	0.40562	-0.00174969	0.40737	0.681815	0.783918	0.520121	0.597479	0.519659	0.000160324	0.40775	0.356716	0.0612076	0.00126571	4	activated in tumors	Oncogene	TRUE
GABPA	MSH6	MSH6 p.T1085fs // MSH6 p.T783fs // MSH6 p.T955fs	26	7000	0.577483	-0.00297341	0.580457	0.771429	0.784141	0.740288	0.752443	0.740246	0.000161605	0.582213	0.53235	0.0531283	0.00172051	6	activated in tumors	TSG	TRUE
REL	NFE2L2	NFE2L2 missense	175	6974	-0.23183	0.00404676	-0.235877	0.895121	0.815064	-0.288674	0.263514	0.289397	0.000161916	-0.236569	0.0743215	0.012935	0.0367465	2	deactivated in tumors	Oncogene	TRUE
NR1I2	MSH6	MSH6 p.T1085fs // MSH6 p.T783fs // MSH6 p.T955fs	26	7000	0.562484	-0.00313051	0.565615	0.708908	0.766165	0.73843	0.797868	0.738241	0.000162692	0.568665	0.7876	0.71984	0.00172051	5	deactivated in tumors	TSG	TRUE
E2F7	CDKN1B	CDKN1B truncating	36	7114	0.400615	0.012199	0.388416	0.722557	0.62506	0.620895	0.537558	0.621406	0.000162725	0.394073	0.0251733	0.00212367	0.00813625	3	activated in tumors	TSG	TRUE
HIF1A	TRIO	TRIO p.H2348fs	9	6905	0.891908	0.0127423	0.879166	0.501566	0.702041	1.25265	1.75284	1.2523	0.000163346	0.884192	0.622252	0.952664	0.0068061	3	activated in tumors	Oncogene	TRUE
STAT3	HRAS	HRAS 3D hotspot 1-166-1nvw	57	7081	-0.351208	0.0112162	-0.362424	0.805207	0.721522	-0.501822	0.4501	0.502305	0.000163472	-0.362145	0.41636	0.0190269	0.00128244	3	deactivated in tumors	Oncogene	TRUE
CEBPA	HNF1A	HNF1A truncating	31	7095	0.471972	0.00324879	0.468723	0.661832	0.685851	0.683517	0.708221	0.683418	0.000163605	0.465862	0.631224	0.416822	0.0211622	4	deactivated in tumors	TSG	TRUE
IRF1	MSH6	MSH6 truncating	61	7000	0.422129	0.00929329	0.412836	1.04909	0.836372	0.492405	0.393519	0.493603	0.000165298	0.40662	0.708817	0.00960687	0.00172051	4	no differential activity	TSG	TRUE
E2F7	SMARCA4	SMARCA4 missense	230	6895	0.168564	0.00873804	0.159826	0.563713	0.627462	0.255511	0.283523	0.254718	0.000165304	0.158037	0.0247763	0.00340529	0.00394475	3	activated in tumors	TSG	TRUE
TCF3	CTCF	CTCF truncating	67	7006	-0.365644	0.0230112	-0.388655	0.791127	0.844497	-0.460484	0.491268	0.460221	0.000165661	-0.390999	0.0125694	0.125483	0.00828304	7	deactivated in tumors	TSG	TRUE
BACH1	KEAP1	KEAP1 truncating	35	6941	-0.456011	0.0308874	-0.486898	0.834484	0.752989	-0.646262	0.583473	0.646621	0.000165665	-0.481364	0.0879094	0.854104	0.00248498	3	no differential activity	Oncogene	TRUE
PPARG	PIK3CA	PIK3CA p.E542K	135	6014	0.236263	-0.00262904	0.238892	0.851293	0.728701	0.326537	0.280623	0.327833	0.000167038	0.240257	0.761058	0.578332	0.0061761	4	deactivated in tumors	Oncogene	TRUE
GLI2	NFE2L2	NFE2L2 missense	175	6974	0.202356	-0.000860493	0.203216	0.918016	0.748697	0.269778	0.221365	0.271426	0.000167305	0.217554	0.000380998	0.61858	0.0367465	5	deactivated in tumors	Oncogene	TRUE
ATF4	CTNNB1	CTNNB1 hotspot T41	147	6783	-0.263857	-0.00817931	-0.255678	0.830042	0.826921	-0.309168	0.30803	0.309193	0.000168134	-0.259455	0.0433941	0.00824263	0.00908647	3	activated in tumors	Oncogene	TRUE
GABPA	TP53	TP53 3D hotspot 96-290-2mej	433	4377	0.0942218	-0.0556262	0.149848	0.832209	0.759521	0.195539	0.18006	0.197293	0.00016831	0.145442	0.136577	0.0140313	0.00838662	4	activated in tumors	TSG	TRUE
YY1	BRAF	BRAF interaction disrupting MAP2K1	469	6510	-0.128879	0.0181624	-0.147041	0.752305	0.797297	-0.185107	0.195455	0.184425	0.000168452	-0.143966	0.898845	0.0039916	0.00205963	3	activated in tumors	Oncogene	TRUE
PPARD	RB1	RB1 truncating	155	6859	-0.20235	0.00121399	-0.203564	0.696239	0.68897	-0.295392	0.292376	0.295461	0.000168808	-0.210557	0.138354	4.69553e-05	0.00819216	4	deactivated in tumors	TSG	TRUE
E2F7	BRCA2	BRCA2 missense	255	6813	0.158206	0.00853246	0.149674	0.62805	0.625325	0.239316	0.238315	0.239354	0.000168827	0.150189	0.0268996	0.00242069	0.0295448	3	activated in tumors	TSG	TRUE
NRF1	TP53	TP53 hotspot T284	209	4377	0.0911753	-0.104357	0.195533	0.805424	0.739101	0.263436	0.24277	0.264555	0.000168909	0.197204	0.00750321	1.82098e-09	0.00838782	6	activated in tumors	TSG	TRUE
GABPA	HRAS	HRAS 3D hotspot 1-166-1wq1	69	7081	0.356597	-0.00174969	0.358347	0.673807	0.783918	0.457692	0.531824	0.457123	0.000169486	0.35633	0.379154	0.0616512	0.00132035	4	activated in tumors	Oncogene	TRUE
GLI2	MSH6	MSH6 truncating	61	7000	-0.366866	0.00938183	-0.376247	0.74698	0.754212	-0.498902	0.503691	0.498861	0.000169757	-0.365057	0.0034232	0.691033	0.00172051	6	deactivated in tumors	TSG	TRUE
GABPA	HRAS	HRAS missense	78	7081	0.335894	-0.00174969	0.337643	0.685554	0.783918	0.431259	0.492512	0.430713	0.000170421	0.33524	0.359046	0.0685197	0.00132035	4	activated in tumors	Oncogene	TRUE
VDR	BRAF	BRAF interaction disrupting MAP2K1	469	6510	0.128193	-0.0067963	0.134989	0.671583	0.724949	0.187097	0.201002	0.186205	0.000171291	0.130639	0.686599	0.0195941	0.00208309	3	deactivated in tumors	Oncogene	TRUE
ESR1	HRAS	HRAS missense	78	7081	-0.296609	0.0248029	-0.321412	0.786877	0.744719	-0.431318	0.408465	0.431588	0.000171573	-0.318916	0.338322	0.0419136	0.00132107	2	deactivated in tumors	Oncogene	TRUE
NFKB1	CASP8	CASP8 missense	92	7006	0.303928	0.00275429	0.301174	0.794702	0.751749	0.400329	0.378977	0.400631	0.000171633	0.296857	0.723872	0.00134246	0.00934706	2	no differential activity	TSG	TRUE
E2F4	EGFR	EGFR inframe indel	35	6797	-0.437185	0.0155518	-0.452737	0.811114	0.685998	-0.659315	0.558166	0.659968	0.000172035	-0.437043	0.00164254	0.000445138	0.0281883	2	activated in tumors	Oncogene	TRUE
FOXO3	TP53	TP53 p.111	7	4377	-1.11848	0.0607737	-1.17926	0.682576	0.832486	-1.41687	1.72766	1.41655	0.000172092	-1.18243	0.31933	0.000716094	0.00851693	2	deactivated in tumors	TSG	TRUE
ATF2	NRAS	NRAS p.Q61K	57	6936	0.408413	0.00241021	0.406002	0.8847	0.816728	0.496763	0.458915	0.497108	0.000172218	0.408795	0.18477	0.681295	0.00385902	3	deactivated in tumors	Oncogene	TRUE
E2F4	TSC1	TSC1 missense	71	7062	0.312157	0.00978931	0.302368	0.649739	0.689745	0.438619	0.465368	0.438376	0.000172344	0.308548	0.00111536	5.41143e-05	0.00775546	2	activated in tumors	TSG	TRUE
MYCN	EGFR	EGFR inframe indel	35	6797	-0.477351	0.0182697	-0.495621	1.01648	0.75503	-0.655102	0.487588	0.656426	0.000172975	-0.481687	0.0998037	0.00238326	0.0281883	2	activated in tumors	Oncogene	TRUE
PPARA	CTNNB1	CTNNB1 hotspot Y331	12	6783	0.851414	-0.0128617	0.864276	0.621879	0.794169	1.08862	1.38978	1.08828	0.00017345	0.861863	0.0642019	0.135667	0.00926723	2	deactivated in tumors	Oncogene	TRUE
HNF1A	NCOR1	NCOR1 missense	198	6906	-0.12954	0.00278661	-0.132327	0.525858	0.50382	-0.262322	0.25164	0.262647	0.000174343	-0.136591	0.0072983	0.232069	0.0326893	4	deactivated in tumors	TSG	TRUE
CREB1	PTEN	PTEN p.L265fs	15	6484	0.830965	0.0106262	0.820339	0.74473	0.85924	0.954982	1.10152	0.954726	0.000174365	0.833844	0.0018456	0.435388	0.0228524	2	activated in tumors	TSG	TRUE
FOXM1	CARD11	CARD11 p.R555fs	20	6914	0.463311	0.00589075	0.45742	0.312671	0.577774	0.792463	1.46295	0.791694	0.000174476	0.485279	0.00896995	2.97621e-05	0.00420612	4	activated in tumors	Oncogene	TRUE
HNF1A	BRAF	BRAF p.600	460	6510	-0.092942	0.00732942	-0.100271	0.496622	0.506112	-0.198364	0.201907	0.198121	0.000174872	-0.0923175	0.0223128	0.310439	0.00211527	4	deactivated in tumors	Oncogene	TRUE
HSF1	FBXW7	FBXW7 truncating	97	6806	0.272176	0.00365211	0.268523	0.729108	0.695695	0.385715	0.36829	0.385979	0.000175478	0.267651	0.782356	0.155798	0.0244909	3	activated in tumors	TSG	TRUE
TCF4	CASP8	CASP8 missense	92	7006	-0.288714	0.0297194	-0.318433	0.820782	0.785756	-0.40502	0.387963	0.405257	0.000176556	-0.309617	0.00112058	0.357883	0.00934706	3	deactivated in tumors	TSG	TRUE
TCF4	VHL	VHL interface TCEB2	41	6853	0.465398	0.018224	0.447174	0.589471	0.789739	0.566959	0.758602	0.56623	0.000176669	0.463439	0.000323384	0.258221	0.0638762	3	deactivated in tumors	TSG	FALSE
PPARA	CTNNB1	CTNNB1 3D hotspot 157-664-3ouw	29	6783	0.542103	-0.0128617	0.554965	0.646466	0.794169	0.699284	0.858459	0.698799	0.000176771	0.554432	0.0667614	0.151489	0.00933852	2	deactivated in tumors	Oncogene	TRUE
STAT2	FBXW7	FBXW7 p.R465H	20	6806	0.707684	-0.0010327	0.708717	0.898994	0.820633	0.863382	0.788345	0.863623	0.000176879	0.690589	0.322601	0.0424255	0.0244909	3	activated in tumors	TSG	TRUE
GATA3	BRAF	BRAF hotspot S602	483	6510	0.147442	0.0162078	0.131234	0.655191	0.703904	0.187302	0.200299	0.186437	0.000176936	0.124913	0.272609	0.0693717	0.00212885	4	deactivated in tumors	Oncogene	TRUE
JUN	KRAS	KRAS interface KRAS	37	6615	0.437799	-0.00119291	0.438992	0.946522	0.714666	0.613012	0.463795	0.614262	0.000177804	0.442901	0.189363	0.0563953	0.0055154	3	deactivated in tumors	Oncogene	TRUE
HNF1A	NR4A2	NR4A2 p.N231fs // NR4A2 p.N294fs	5	7068	-0.837917	-0.000171118	-0.837746	0.355095	0.505566	-1.65728	2.35922	1.65705	0.000178227	-0.84788	0.0125562	0.272696	0.00464941	3	deactivated in tumors	TSG	TRUE
MYB	TP53	TP53 3D hotspot 97-287-1ycs	581	4377	-0.1134	0.0109398	-0.12434	0.788307	0.745222	-0.1657	0.157731	0.16685	0.000178376	-0.124313	0.913042	0.595947	0.00879808	4	deactivated in tumors	TSG	TRUE
SMAD4	CHD4	CHD4 truncating	41	6885	-0.439418	0.0152777	-0.454696	0.689167	0.750756	-0.605926	0.659776	0.605651	0.00017934	-0.440295	0.000124766	0.0627985	0.035868	3	deactivated in tumors	Oncogene	TRUE
CREB1	GNAQ	GNAQ missense	49	7106	0.474954	0.0110195	0.463934	0.761271	0.860872	0.539307	0.609421	0.538912	0.000181419	0.462021	0.0135689	0.178965	0.0204097	4	activated in tumors	Oncogene	TRUE
E2F7	PIK3CA	PIK3CA 3D hotspot 8-1059-4l23	538	6014	-0.0923096	0.0230803	-0.11539	0.674909	0.617154	-0.185487	0.170971	0.186971	0.000181521	-0.105526	0.0141378	0.0343826	0.0066653	3	activated in tumors	Oncogene	TRUE
TCF3	CTNNB1	CTNNB1 hotspot T41	147	6783	-0.242397	0.0257786	-0.268176	0.759353	0.847531	-0.31708	0.353164	0.31642	0.000182149	-0.264027	0.022026	0.309759	0.00939224	5	deactivated in tumors	Oncogene	TRUE
NR3C1	CTNNB1	CTNNB1 CSNK2A1 phosphorylation loss	113	6783	-0.261868	0.0228074	-0.284676	0.774714	0.797948	-0.356926	0.367459	0.35676	0.000182256	-0.283299	0.197491	0.357929	0.00939224	2	deactivated in tumors	Oncogene	TRUE
GATA3	BRAF	BRAF activitygain	467	6510	0.149583	0.0162078	0.133375	0.656438	0.703904	0.190309	0.20318	0.189479	0.000183362	0.126654	0.27668	0.0653254	0.00219449	4	deactivated in tumors	Oncogene	TRUE
TCF4	CTNNB1	CTNNB1 missense	354	6783	0.168885	0.0176285	0.151256	0.739381	0.788383	0.19243	0.204571	0.191856	0.00018378	0.160497	0.000255881	0.425039	0.00939224	2	deactivated in tumors	Oncogene	TRUE
SP1	HRAS	HRAS 3D hotspot 1-166-1wq1	69	7081	-0.319642	0.0152871	-0.334929	0.796251	0.738274	-0.453313	0.420632	0.453664	0.000183975	-0.334496	0.625996	0.323555	0.00140787	3	no differential activity	Oncogene	TRUE
RUNX1	HSPA8	HSPA8 interface BAG3	5	7068	1.33323	-0.0103256	1.34355	0.631437	0.80251	1.67437	2.12777	1.67419	0.000185125	1.34278	0.160845	0.995826	0.0118321	4	deactivated in tumors	Oncogene	TRUE
PAX6	FGFR2	FGFR2 p.C382R	6	6972	-1.09199	0.0112404	-1.10323	1.16747	0.719638	-1.53213	0.94497	1.53303	0.000185138	-1.10008	0.0412184	0.227136	0.124861	5	deactivated in tumors	Oncogene	FALSE
ESR2	FGFR3	FGFR3 interface FGF1 // FGFR3 3D hotspot 150-362-1ry7	23	7059	-0.679738	0.0137652	-0.693503	0.897579	0.855515	-0.8105	0.772637	0.810627	0.000185476	-0.668593	0.0205337	0.0231614	0.00549287	5	deactivated in tumors	Oncogene	TRUE
STAT3	KEAP1	KEAP1 missense	188	6941	-0.190642	0.0162149	-0.206857	0.806686	0.719526	-0.286526	0.256428	0.28749	0.000185827	-0.199992	0.617979	0.0401573	0.00272279	2	deactivated in tumors	Oncogene	TRUE
NR3C1	EGFR	EGFR inframe indel	35	6797	-0.476019	0.0244574	-0.500477	1.13218	0.792855	-0.629607	0.442046	0.631233	0.000185893	-0.503977	0.196592	0.261434	0.028692	3	deactivated in tumors	Oncogene	TRUE
MEF2A	PIK3CA	PIK3CA p.H1047R	208	6014	-0.18671	0.00261441	-0.189325	0.886268	0.830126	-0.227539	0.21362	0.228068	0.000185903	-0.221153	0.437226	5.79611e-05	0.00677948	5	no differential activity	Oncogene	TRUE
FOXO3	PTEN	PTEN activityloss	94	6484	-0.312452	0.0171081	-0.32956	0.8536	0.854958	-0.385478	0.386083	0.38547	0.000186186	-0.332688	0.501306	0.347922	0.0234256	2	deactivated in tumors	TSG	TRUE
FOXO3	ATM	ATM missense	359	6712	0.177132	0.00471375	0.172418	0.860736	0.852857	0.20207	0.200314	0.202165	0.000186217	0.173279	0.835814	0.738289	0.0129687	1	deactivated in tumors	TSG	TRUE
AR	BRAF	BRAF missense	624	6510	0.151758	0.0142301	0.137528	0.802555	0.813589	0.169238	0.171363	0.169039	0.000186438	0.127645	0.000902091	0.170108	0.00221956	3	activated in tumors	Oncogene	TRUE
TP63	NFE2L2	NFE2L2 interface KEAP1 // NFE2L2 3D hotspot 69-84-4ifl	54	6974	0.35357	0.00777032	0.3458	0.694761	0.67851	0.509552	0.497725	0.509645	0.000186541	0.346802	0.989739	0.152857	0.0367465	4	deactivated in tumors	Oncogene	TRUE
TP63	NFE2L2	NFE2L2 3D hotspot 69-84-2flu	54	6974	0.35357	0.00777032	0.3458	0.694761	0.67851	0.509552	0.497725	0.509645	0.000186541	0.346802	0.989739	0.152857	0.0367465	4	deactivated in tumors	Oncogene	TRUE
PAX5	TCF7L2	TCF7L2 truncating	34	7051	-0.519782	0.0207713	-0.540554	0.816868	0.824415	-0.655709	0.66174	0.655681	0.00018682	-0.529865	0.10047	0.0726935	0.0560461	4	deactivated in tumors	TSG	FALSE
JUND	FGFR3	FGFR3 interface FGF8 // FGFR3 3D hotspot 150-357-2fdb	26	7059	-0.451689	0.0055655	-0.457254	0.589407	0.602442	-0.759058	0.775787	0.759001	0.000187164	-0.442707	0.0264328	0.0819873	0.00549287	4	deactivated in tumors	Oncogene	TRUE
FOS	HIF1A	HIF1A missense	52	7094	0.369933	0.0174548	0.352479	0.737213	0.675214	0.521667	0.478123	0.522025	0.000187658	0.351378	0.0255274	0.92578	0.0303095	2	activated in tumors	Oncogene	TRUE
BACH1	HRAS	HRAS interface RASA1	69	7081	-0.315987	0.0261146	-0.342101	0.822373	0.753897	-0.453368	0.415993	0.453777	0.000187977	-0.341056	0.0466075	0.759848	0.00142972	4	no differential activity	Oncogene	TRUE
FOS	EGFR	EGFR activitygain	33	6797	-0.42582	0.0220631	-0.447883	0.825601	0.673652	-0.664077	0.542493	0.664858	0.000189108	-0.439871	0.0302204	0.995942	0.028692	2	activated in tumors	Oncogene	TRUE
MEF2A	MYB	MYB truncating	9	7097	-1.02217	-0.00409434	-1.01807	0.648283	0.835836	-1.2183	1.57041	1.21803	0.000189216	-1.04044	0.661185	9.50315e-05	0.028004	5	no differential activity	TSG	TRUE
MYC	TP53	TP53 p.270	11	4377	0.773965	-0.0372769	0.811242	0.398696	0.715004	1.13549	2.03474	1.1346	0.000189302	0.804497	0.914913	4.0467e-05	0.0092783	2	activated in tumors	TSG	TRUE
SPI1	TP53	TP53 p.R273C	105	4377	0.270321	0.00673529	0.263586	0.820889	0.76482	0.344031	0.321098	0.344637	0.000189383	0.283104	0.000854783	0.360318	0.0092783	3	activated in tumors	TSG	TRUE
MYB	KEAP1	KEAP1 truncating	35	6941	-0.479907	-0.00110573	-0.478801	0.966698	0.764262	-0.625574	0.495296	0.626488	0.000189587	-0.484658	0.297254	0.453782	0.00272279	5	deactivated in tumors	Oncogene	TRUE
MYB	CTNNB1	CTNNB1 hotspot S29	117	6783	0.256394	-0.0120939	0.268488	0.760783	0.765796	0.350638	0.35291	0.350599	0.000190968	0.26657	0.196532	0.854951	0.00965465	4	deactivated in tumors	Oncogene	TRUE
GABPA	TP53	TP53 interface BCL2L1	418	4377	0.0949788	-0.0556262	0.150605	0.835736	0.759521	0.196496	0.180206	0.198289	0.000191073	0.14655	0.127676	0.0159324	0.00932979	4	activated in tumors	TSG	TRUE
RUNX2	HRAS	HRAS 3D hotspot 5-164-1nvw	29	7081	-0.497434	0.00731003	-0.504744	0.732565	0.716573	-0.704323	0.68901	0.704386	0.000191433	-0.497269	0.000214675	0.0869633	0.00144719	4	no differential activity	Oncogene	TRUE
SMAD4	NCOR2	NCOR2 missense	99	6980	-0.280652	0.0155852	-0.296237	0.731642	0.751944	-0.394108	0.404894	0.393962	0.00019258	-0.283677	0.000134981	0.0499199	0.0115548	3	deactivated in tumors	Oncogene	TRUE
SOX2	NOTCH1	NOTCH1 truncating	76	6840	-0.311459	0.000785904	-0.312245	0.766263	0.733141	-0.425686	0.40749	0.4259	0.000193203	-0.315881	0.329383	0.021453	0.115922	5	deactivated in tumors	TSG	FALSE
PBX1	HRAS	HRAS 3D hotspot 1-166-1nvw	57	7081	-0.318776	0.00957285	-0.328349	0.642121	0.660286	-0.497388	0.51135	0.497282	0.000193493	-0.327128	0.012059	0.00772673	0.00145395	4	deactivated in tumors	Oncogene	TRUE
GATA1	TP53	TP53 p.A159P	9	4377	-0.948904	0.0426445	-0.991549	1.1716	0.79228	-1.25016	0.846322	1.25151	0.000193616	-0.987079	0.654791	0.0596732	0.00942245	4	deactivated in tumors	TSG	TRUE
PAX6	CTCF	CTCF p.A201fs	8	7006	-0.960776	0.00872657	-0.969503	0.639394	0.721096	-1.34463	1.51628	1.34449	0.000194278	-0.951068	0.0265599	0.268858	0.00832619	6	deactivated in tumors	TSG	TRUE
MYB	TP53	TP53 p.109	11	4377	-0.819267	0.0109398	-0.830207	0.559019	0.745222	-1.11459	1.48511	1.11404	0.000194797	-0.838772	0.13379	0.937769	0.00944846	4	deactivated in tumors	TSG	TRUE
PPARA	CTNNB1	CTNNB1 hotspot T332 // CTNNB1 hotspot Y333	13	6783	0.809694	-0.0128617	0.822555	0.614112	0.794169	1.03611	1.33942	1.03574	0.000197662	0.820915	0.0631928	0.13656	0.00988674	2	deactivated in tumors	Oncogene	TRUE
MYB	HRAS	HRAS 3D hotspot 1-166-1nvx	33	7081	-0.504457	-0.00437647	-0.500081	0.722085	0.767063	-0.652109	0.692551	0.651942	0.000198638	-0.498246	0.315391	0.804363	0.00147257	5	deactivated in tumors	Oncogene	TRUE
NRF1	KRAS	KRAS p.12	371	6615	-0.168253	0.00295732	-0.171211	0.82883	0.782705	-0.218043	0.206569	0.218742	0.00019872	-0.156373	0.0218984	1.10806e-06	0.00604333	5	activated in tumors	Oncogene	TRUE
EZH2	EGFR	EGFR missense	316	6797	0.1615	-0.00865231	0.170152	0.950664	0.809481	0.208456	0.178983	0.210199	0.000199259	0.175047	0.0533749	0.67367	0.0292244	4	activated in tumors	Oncogene	TRUE
SMAD3	AXIN2	AXIN2 p.G665fs	24	7041	-0.636404	0.0223508	-0.658754	0.885965	0.831322	-0.792243	0.743544	0.792418	0.000199514	-0.632292	0.000264918	0.000501568	0.0056695	3	deactivated in tumors	TSG	TRUE
E2F1	TP53	TP53 hotspot S183	130	4377	0.159532	-0.0480138	0.207546	0.649662	0.62954	0.329372	0.319467	0.329679	0.000200211	0.208187	0.0536367	1.12222e-06	0.00967887	2	activated in tumors	TSG	TRUE
SP1	HRAS	HRAS interface RASA1	69	7081	-0.317661	0.0152871	-0.332948	0.796939	0.738274	-0.450628	0.417784	0.450982	0.000200774	-0.332528	0.624137	0.322396	0.00147257	3	no differential activity	Oncogene	TRUE
GATA2	GATA3	GATA3 truncating	107	6972	-0.245515	0.0172179	-0.262733	0.6801	0.779214	-0.33778	0.386315	0.337176	0.000201248	-0.283013	0.38737	0.00903121	0.00458226	5	activated in tumors	TSG	TRUE
SMAD3	AXIN2	AXIN2 truncating	44	7041	-0.463159	0.0223508	-0.485509	0.903579	0.831322	-0.5837	0.537318	0.584021	0.000201582	-0.46727	0.000224231	0.000389676	0.0056695	3	deactivated in tumors	TSG	TRUE
MAX	PIK3CA	PIK3CA missense	1097	6014	-0.0825975	0.0210382	-0.103636	0.821479	0.764061	-0.134036	0.126158	0.135638	0.000201754	-0.0955906	0.216407	0.00320529	0.00730745	4	activated in tumors	Oncogene	TRUE
RUNX1	CASP8	CASP8 truncating	67	7006	0.352295	-0.0180275	0.370322	0.697883	0.80234	0.462078	0.530637	0.461553	0.000202171	0.366113	0.273705	0.941113	0.0101085	3	deactivated in tumors	TSG	TRUE
E2F7	TP53	TP53 3D hotspot 97-291-4a63	494	4377	0.0665525	-0.0438711	0.110424	0.609757	0.63579	0.174389	0.181094	0.173679	0.000202297	0.11162	0.0242423	0.000766267	0.00974743	3	activated in tumors	TSG	TRUE
STAT2	HSPA8	HSPA8 interface HSPA2	8	7068	1.08382	0.0021271	1.08169	0.980164	0.830791	1.30175	1.10358	1.302	0.000202836	1.09222	0.130663	0.00558622	0.0118321	3	activated in tumors	Oncogene	TRUE
ETS1	HRAS	HRAS 3D hotspot 1-166-1bkd	72	7081	0.35621	-4.33748e-05	0.356253	0.707962	0.803825	0.443692	0.50321	0.443198	0.000203338	0.353349	0.585559	0.00465703	0.00147257	4	activated in tumors	Oncogene	TRUE
BACH1	HRAS	HRAS 3D hotspot 1-166-1wq1	69	7081	-0.314095	0.0261146	-0.34021	0.822914	0.753897	-0.450858	0.413421	0.451269	0.000203606	-0.339216	0.0467045	0.761456	0.00147257	4	no differential activity	Oncogene	TRUE
GABPA	HRAS	HRAS interface RASGRF1 // HRAS 3D hotspot 1-166-1xd2 // HRAS 3D hotspot 1-166-4nyi	70	7081	0.34955	-0.00174969	0.351299	0.692273	0.783918	0.44861	0.507458	0.448133	0.000203608	0.34952	0.376665	0.066106	0.00147257	4	activated in tumors	Oncogene	TRUE
SP1	HRAS	HRAS interface NF1	70	7081	-0.314755	0.0152871	-0.330043	0.791517	0.738274	-0.446724	0.416975	0.447046	0.000203955	-0.329792	0.622588	0.320745	0.00147257	3	no differential activity	Oncogene	TRUE
FOXM1	CTNNB1	CTNNB1 hotspot S37	185	6783	-0.146902	0.0154666	-0.162369	0.5891	0.576352	-0.281552	0.275622	0.281718	0.000204074	-0.159492	0.0261499	1.05694e-05	0.0101	2	activated in tumors	Oncogene	TRUE
PPARG	PTCH1	PTCH1 p.T778M // PTCH1 p.778	5	6926	1.25883	0.0148284	1.24401	1.67856	0.746989	1.66342	0.741116	1.66536	0.000204185	1.24316	0.281896	0.215989	0.107197	4	deactivated in tumors	TSG	FALSE
PPARA	RUNX1	RUNX1 DNA/RNA aff. disabling	13	7043	0.804518	-0.00921812	0.813736	1.04818	0.789731	1.02973	0.77633	1.0304	0.000204207	0.815121	0.0759272	0.329593	0.0377783	5	deactivated in tumors	TSG	TRUE
E2F4	HNF1A	HNF1A truncating	31	7095	0.454168	0.0120181	0.44215	0.803618	0.689031	0.641213	0.5502	0.641699	0.000204269	0.460692	0.000673686	8.08925e-05	0.0211622	2	activated in tumors	TSG	TRUE
PBX1	HRAS	HRAS 3D hotspot 1-166-4nyj	69	7081	-0.289802	0.00957285	-0.299375	0.649241	0.660286	-0.453473	0.461115	0.453402	0.000204822	-0.296455	0.0128184	0.00817812	0.00147257	4	deactivated in tumors	Oncogene	TRUE
BACH1	HRAS	HRAS interface NF1	70	7081	-0.311723	0.0261146	-0.337838	0.817171	0.753897	-0.447744	0.413424	0.448122	0.000205416	-0.336582	0.046966	0.763769	0.00147257	4	no differential activity	Oncogene	TRUE
ESR1	MSH6	MSH6 truncating	61	7000	-0.329073	0.0267777	-0.355851	0.919505	0.742621	-0.4781	0.387003	0.479182	0.000206058	-0.355708	0.404198	0.0409425	0.00203347	4	deactivated in tumors	TSG	TRUE
ATF4	PIK3CA	PIK3CA p.1043	27	6014	-0.573138	0.0109602	-0.584098	0.654019	0.815221	-0.717041	0.89309	0.71649	0.000208778	-0.583003	0.111393	0.720822	0.00751078	4	activated in tumors	Oncogene	TRUE
E2F1	EGFR	EGFR interaction decreasing LAT // EGFR interaction decreasing ACTN4 // EGFR interaction decreasing ABL1 // EGFR interaction decreasing TGFA // EGFR interaction decreasing RAF1 // EGFR interaction decreasing NR3C1 // EGFR interaction decreasing ITGB2 // EGFR interaction decreasing RET // EGFR interaction decreasing HSP90AB1 // EGFR interaction decreasing FGR // EGFR interaction decreasing PIM1 //…	22	6797	-0.502868	0.016789	-0.519657	0.750874	0.632268	-0.821374	0.69207	0.821893	0.00020906	-0.501074	0.027854	0.00102441	0.0296729	2	activated in tumors	Oncogene	TRUE
ATF4	TP53	TP53 interaction disrupting NRDC	115	4377	0.146612	-0.124476	0.271089	0.637671	0.818415	0.332901	0.425123	0.331236	0.00021073	0.285194	0.240421	2.98328e-07	0.0101204	3	activated in tumors	TSG	TRUE
BACH1	TP53	TP53 missense	1991	4377	0.0620822	-0.0105522	0.0726344	0.749491	0.750441	0.0968273	0.0969116	0.096789	0.000211544	0.0752542	0.00833121	0.353439	0.0101262	3	no differential activity	TSG	TRUE
ETS1	CTNNB1	CTNNB1 interface HLA-A	154	6783	0.235101	-0.00713745	0.242238	0.702028	0.804624	0.301854	0.345055	0.301058	0.000211664	0.242365	0.598876	0.00857949	0.0103665	4	activated in tumors	Oncogene	TRUE
ATF1	TP53	TP53 3D hotspot 96-288-2mej	501	4377	0.0918188	-0.0329488	0.124768	0.778105	0.74829	0.166046	0.160348	0.166737	0.000213226	0.131019	1.46285e-06	0.00154365	0.0101733	2	activated in tumors	TSG	TRUE
EGR1	ARID1A	ARID1A missense	193	6602	0.233904	0.0152324	0.218672	0.82687	0.843091	0.259509	0.264457	0.259369	0.000215566	0.228088	0.0142474	0.162103	0.0118561	3	deactivated in tumors	TSG	TRUE
E2F1	EZH2	EZH2 interface EED	10	7038	0.75857	0.0156245	0.742946	0.646922	0.63609	1.16796	1.14843	1.16799	0.000215794	0.744703	0.0175095	0.000335027	0.0425833	1	activated in tumors	Oncogene	TRUE
MYB	TP53	TP53 3D hotspot 97-291-4a63	494	4377	-0.120703	0.0109398	-0.131642	0.774904	0.745222	-0.175926	0.169882	0.176648	0.000215901	-0.131531	0.88372	0.7155	0.0102674	4	deactivated in tumors	TSG	TRUE
E2F7	PIK3CA	PIK3CA 3D hotspot 5-1062-3hhm	513	6014	-0.093109	0.0230803	-0.116189	0.677366	0.617154	-0.186773	0.171531	0.188266	0.000217425	-0.10657	0.0179282	0.0515713	0.00776936	3	activated in tumors	Oncogene	TRUE
STAT2	MAP2K4	MAP2K4 truncating	33	7061	0.544611	0.000939222	0.543672	0.992808	0.83075	0.653804	0.547611	0.654435	0.000217498	0.536629	0.149477	0.00557816	0.0978739	4	activated in tumors	TSG	FALSE
ESR2	PPP2R1A	PPP2R1A p.P179R	12	7045	0.92588	0.0099033	0.915977	0.946972	0.855773	1.07016	0.96727	1.07035	0.000217921	0.915531	0.0111486	0.0123387	0.191985	5	deactivated in tumors	Oncogene	FALSE
STAT1	NRAS	NRAS p.Q61R	82	6936	-0.307582	0.0218279	-0.32941	0.818024	0.799011	-0.412158	0.40269	0.412272	0.000219602	-0.328502	0.784991	0.000534793	0.00470849	4	deactivated in tumors	Oncogene	TRUE
MEF2A	CTNNB1	CTNNB1 hotspot S33	155	6783	-0.246221	0.00359725	-0.249818	0.665796	0.842371	-0.297808	0.375217	0.296565	0.000219764	-0.251781	0.685412	0.000250716	0.0106523	5	no differential activity	Oncogene	TRUE
MEF2A	CTNNB1	CTNNB1 interface FBXW11	155	6783	-0.246221	0.00359725	-0.249818	0.665796	0.842371	-0.297808	0.375217	0.296565	0.000219764	-0.251781	0.685412	0.000250716	0.0106523	5	no differential activity	Oncogene	TRUE
BACH1	NRAS	NRAS p.Q61R	82	6936	-0.274515	0.0253297	-0.299844	0.748218	0.754355	-0.397522	0.400745	0.397484	0.000220133	-0.310133	0.0252652	0.822031	0.00470849	4	no differential activity	Oncogene	TRUE
RUNX2	TP53	TP53 interface TP53BP2	568	4377	-0.0839246	0.0313844	-0.115309	0.734505	0.701276	-0.16352	0.156989	0.164427	0.000220736	-0.116205	0.146171	0.00873553	0.0104633	3	no differential activity	TSG	TRUE
NR1I2	SETD2	SETD2 missense	205	6852	0.195628	-0.00532172	0.200949	0.726676	0.76817	0.261993	0.276532	0.261595	0.000221163	0.201029	0.989586	0.830047	0.0110581	5	deactivated in tumors	TSG	TRUE
ESR1	PIK3CA	PIK3CA p.E542K	135	6014	0.234408	-0.00138062	0.235788	0.885524	0.735214	0.319143	0.26627	0.320707	0.000222665	0.237955	0.655919	0.662766	0.00787156	2	deactivated in tumors	Oncogene	TRUE
E2F6	SMO	SMO missense	77	7077	0.34797	0.00730119	0.340669	0.800934	0.807313	0.422014	0.42534	0.421979	0.000222845	0.341671	0.445508	0.128228	0.0394484	3	activated in tumors	Oncogene	TRUE
E2F7	PIK3CA	PIK3CA 3D hotspot 8-1053-4l2y	547	6014	-0.0897065	0.0230803	-0.112787	0.674495	0.617154	-0.181292	0.167217	0.182753	0.000223242	-0.10324	0.0150218	0.0353874	0.00787156	3	activated in tumors	Oncogene	TRUE
ESR1	HRAS	HRAS 3D hotspot 1-166-1nvx	33	7081	-0.449596	0.0248029	-0.474399	0.609527	0.744719	-0.63749	0.778306	0.637017	0.000223285	-0.479499	0.358136	0.0392078	0.00159152	2	deactivated in tumors	Oncogene	TRUE
ELK1	EGFR	EGFR interface ERRFI1	14	6797	0.706556	0.00869623	0.69786	0.602255	0.710865	0.981971	1.15875	0.981706	0.000223848	0.702255	0.516396	0.139989	0.0307788	3	activated in tumors	Oncogene	TRUE
SMAD4	CREBBP	CREBBP missense	282	6820	-0.16414	0.0184488	-0.182589	0.782934	0.749877	-0.243059	0.233211	0.243492	0.000224706	-0.168831	0.000258613	0.0319255	0.021257	2	deactivated in tumors	TSG	TRUE
HIF1A	NR4A2	NR4A2 missense	68	7068	0.327536	0.0110213	0.316514	0.920435	0.700301	0.450433	0.343875	0.451969	0.000225764	0.316085	0.910155	0.59525	0.00564409	3	activated in tumors	TSG	TRUE
PBX1	GNAS	GNAS missense	78	7074	-0.268659	0.0101457	-0.278805	0.626996	0.660349	-0.422432	0.444667	0.422208	0.000225949	-0.277078	0.0127321	0.00671613	0.10717	5	deactivated in tumors	Oncogene	FALSE
IRF1	HRAS	HRAS interface RAPGEF2 // HRAS 3D hotspot 5-162-3cf6	31	7081	-0.540738	0.012042	-0.55278	0.709328	0.837509	-0.660423	0.779301	0.660029	0.000226056	-0.555876	0.590523	0.0101763	0.00160212	4	no differential activity	Oncogene	TRUE
PPARG	CTNNB1	CTNNB1 hotspot T41	147	6783	0.236812	0.00505422	0.231758	0.681917	0.751366	0.309023	0.339862	0.308448	0.000226266	0.230767	0.478623	0.269693	0.0108555	2	deactivated in tumors	Oncogene	TRUE
E2F4	TP53	TP53 hotspot T155	173	4377	0.138004	-0.0647709	0.202775	0.701863	0.668715	0.302649	0.288909	0.30323	0.000226432	0.191536	0.0298727	7.23354e-07	0.0106985	2	activated in tumors	TSG	TRUE
HIF1A	EP300	EP300 missense	213	6892	0.187725	0.00934806	0.178377	0.83888	0.694847	0.254979	0.212637	0.256714	0.000226656	0.179852	0.687806	0.708834	0.0138118	2	activated in tumors	TSG	TRUE
HIF1A	CAD	CAD missense	162	6969	0.215526	0.0105398	0.204986	0.818733	0.698832	0.292101	0.25037	0.293327	0.000226964	0.20587	0.690651	0.757071	0.00729527	3	activated in tumors	Oncogene	TRUE
MAX	TP53	TP53 3D hotspot 96-288-2mej	501	4377	0.0848489	-0.0484045	0.133253	0.784524	0.75047	0.176721	0.169853	0.17756	0.000227557	0.131037	0.15553	2.14615e-05	0.010717	2	activated in tumors	TSG	TRUE
PAX5	MET	MET interface SOCS1	10	6986	0.967443	0.0162694	0.951174	1.24275	0.823208	1.1545	0.76538	1.15545	0.000227689	0.961287	0.0423703	0.0620135	0.0559186	3	deactivated in tumors	Oncogene	FALSE
NFKB1	CTNNB1	CTNNB1 interface HLA-A	154	6783	-0.208941	0.0155187	-0.22446	0.597628	0.756029	-0.298129	0.375584	0.296893	0.00022912	-0.2261	0.563285	0.00161643	0.0108814	2	no differential activity	Oncogene	TRUE
MYCN	KEAP1	KEAP1 interface KEAP1	36	6941	0.469925	0.0052903	0.464634	0.848147	0.755663	0.61447	0.547823	0.61487	0.000230065	0.465524	0.0952708	0.0033848	0.00323528	3	activated in tumors	Oncogene	TRUE
STAT3	HRAS	HRAS 3D hotspot 5-164-1bkd	53	7081	-0.354944	0.0112162	-0.36616	0.816549	0.721522	-0.506964	0.448424	0.507483	0.000230939	-0.366795	0.42504	0.0192991	0.00162075	3	deactivated in tumors	Oncogene	TRUE
ESR1	HRAS	HRAS interface RASGRF1 // HRAS 3D hotspot 1-166-1xd2 // HRAS 3D hotspot 1-166-4nyi	70	7081	-0.306663	0.0248029	-0.331466	0.776393	0.744719	-0.444902	0.426931	0.445089	0.000231284	-0.329616	0.338844	0.043514	0.00162075	2	deactivated in tumors	Oncogene	TRUE
RUNX2	NRAS	NRAS p.Q61R	82	6936	-0.296428	0.0129835	-0.309412	0.67939	0.7166	-0.43203	0.455426	0.431777	0.000231372	-0.29325	0.000423944	0.0874171	0.00483891	5	no differential activity	Oncogene	TRUE
ETS1	APC	APC truncating	448	6511	0.143464	-0.0062617	0.149726	0.763227	0.80218	0.187219	0.196174	0.186648	0.000231537	0.145245	0.912476	0.00362717	0.05215	4	activated in tumors	TSG	FALSE
CEBPA	GATA3	GATA3 truncating	107	6972	-0.231878	0.00910056	-0.240978	0.810458	0.683832	-0.351331	0.297336	0.352394	0.000232819	-0.247194	0.708254	0.275261	0.00510477	4	deactivated in tumors	TSG	TRUE
PPARG	CASP8	CASP8 missense	92	7006	-0.267927	0.017579	-0.285506	0.747005	0.750116	-0.380636	0.3822	0.380615	0.000233037	-0.290029	0.291088	0.146107	0.0110386	4	deactivated in tumors	TSG	TRUE
E2F7	PIK3CA	PIK3CA interaction increasing IRS1	426	6014	-0.102487	0.0230803	-0.125568	0.68346	0.617154	-0.201959	0.183723	0.203462	0.000234722	-0.115449	0.0125254	0.0625114	0.00822188	3	activated in tumors	Oncogene	TRUE
RUNX2	FGFR3	FGFR3 p.S249C // FGFR3 p.249	19	7059	-0.595474	0.00602159	-0.601495	0.724291	0.714987	-0.84124	0.830461	0.841268	0.000235347	-0.604277	0.000101599	0.113915	0.00661913	5	no differential activity	Oncogene	TRUE
ETS1	HRAS	HRAS interface SOS1 // HRAS 3D hotspot 1-166-1nvu // HRAS 3D hotspot 1-166-1nvv	73	7081	0.349869	-4.33748e-05	0.349913	0.705112	0.803825	0.435816	0.496251	0.43531	0.000236187	0.347329	0.589875	0.00455096	0.00164587	4	activated in tumors	Oncogene	TRUE
PPARG	CARD11	CARD11 p.R555fs	20	6914	-0.587273	0.0173131	-0.604586	0.841654	0.750268	-0.805541	0.718331	0.805826	0.000236225	-0.619007	0.209836	0.199319	0.00549835	5	deactivated in tumors	Oncogene	TRUE
GATA2	FN1	FN1 missense	223	6911	-0.182612	0.0197213	-0.202333	0.852663	0.775946	-0.259919	0.237296	0.260757	0.000236761	-0.195443	0.53612	0.0264178	0.0118914	7	activated in tumors	TSG	TRUE
PBX1	NCOR2	NCOR2 missense	99	6980	-0.242251	0.0120269	-0.254278	0.681521	0.659479	-0.385393	0.373104	0.385574	0.000237468	-0.24556	0.0145943	0.012572	0.0129528	4	deactivated in tumors	Oncogene	TRUE
PPARG	TP53	TP53 interface TP53BP2	568	4377	-0.0704771	0.0505728	-0.12105	0.747313	0.742127	-0.162981	0.16198	0.163112	0.000237677	-0.121803	0.246044	0.0290437	0.0111492	2	deactivated in tumors	TSG	TRUE
ATF1	BRCA1	BRCA1 truncating	71	6936	0.338191	0.0154772	0.322714	0.789386	0.760138	0.42438	0.408816	0.424546	0.000237844	0.33346	5.09748e-06	0.00421217	0.124868	2	activated in tumors	TSG	FALSE
ELK1	TP53	TP53 3D hotspot 96-288-2mej	501	4377	0.0813256	-0.0391416	0.120467	0.752791	0.687613	0.173439	0.160027	0.175196	0.000238262	0.120541	0.881688	0.0861507	0.0111492	3	activated in tumors	TSG	TRUE
EGR1	ERBB2	ERBB2 interface TXK	33	6995	0.558314	0.0206854	0.537629	1.03602	0.842736	0.637215	0.518939	0.637956	0.000238435	0.54104	0.00432853	0.192073	0.10112	2	deactivated in tumors	Oncogene	FALSE
ETS1	CTNNB1	CTNNB1 hotspot S29	117	6783	0.270076	-0.00713745	0.277213	0.700802	0.804624	0.345226	0.395566	0.344525	0.000238462	0.275232	0.632597	0.0151616	0.0112119	4	activated in tumors	Oncogene	TRUE
RXRA	TP53	TP53 p.273	215	4377	0.153551	-0.010459	0.16401	0.669915	0.649163	0.252267	0.244822	0.252649	0.000239064	0.167058	0.726756	0.0168186	0.011151	3	deactivated in tumors	TSG	TRUE
GABPA	HRAS	HRAS interface RASA1	69	7081	0.348327	-0.00174969	0.350077	0.671131	0.783918	0.447141	0.521622	0.446573	0.000239489	0.348033	0.382567	0.0603631	0.0016596	4	activated in tumors	Oncogene	TRUE
CREB1	FN1	FN1 missense	223	6911	0.215179	0.00858331	0.206596	0.89614	0.858493	0.240314	0.23054	0.240649	0.000240356	0.21557	0.00871931	0.190596	0.0118914	5	activated in tumors	TSG	TRUE
SP1	HRAS	HRAS interface RIN1	47	7081	-0.382568	0.0152871	-0.397855	0.735886	0.738274	-0.538911	0.540648	0.538899	0.000240989	-0.396962	0.64054	0.317203	0.00166077	3	no differential activity	Oncogene	TRUE
NRF1	TP53	TP53 p.266	29	4377	0.399157	-0.104357	0.503514	0.641409	0.739101	0.681787	0.785012	0.681252	0.000241637	0.503398	0.00459432	5.96331e-09	0.0112351	6	activated in tumors	TSG	TRUE
PAX5	EGFR	EGFR activitygain	33	6797	0.546161	0.0178205	0.528341	0.816184	0.828121	0.638042	0.64733	0.637999	0.000242106	0.53097	0.0898873	0.150179	0.0318714	3	deactivated in tumors	Oncogene	TRUE
ESR2	CTCF	CTCF p.A201fs	8	7006	-1.12212	0.0141835	-1.1363	1.17553	0.853882	-1.33015	0.966632	1.33075	0.000242295	-1.10926	0.0257758	0.00394499	0.00908605	6	deactivated in tumors	TSG	TRUE
MYC	CIC	CIC truncating	86	6893	0.298036	0.00473703	0.293299	0.781024	0.734496	0.399003	0.375532	0.399321	0.00024404	0.292551	0.0734219	0.00381627	0.0164727	3	activated in tumors	TSG	TRUE
FOXM1	CTNNB1	CTNNB1 p.34	27	6783	-0.399452	0.0154666	-0.414919	0.550807	0.576352	-0.720023	0.753292	0.719904	0.00024432	-0.40737	0.0204364	0.000132133	0.0113735	2	activated in tumors	Oncogene	TRUE
MAX	PIK3CA	PIK3CA p.H1047R	208	6014	-0.188496	0.0210382	-0.209534	0.819379	0.764061	-0.273556	0.255723	0.274238	0.000245274	-0.199949	0.222772	0.100999	0.00853535	4	activated in tumors	Oncogene	TRUE
E2F4	AXIN1	AXIN1 missense	67	7061	0.317586	0.0102142	0.307372	0.746438	0.68933	0.445544	0.411785	0.445899	0.000245612	0.31044	0.00075067	0.00010054	0.00918618	2	activated in tumors	TSG	TRUE
FOSL2	TP53	TP53 DNA interactionloss // TP53 interaction decreasing SAFB // TP53 interaction decreasing PIAS4 // TP53 interaction increasing B2R5M9 // TP53 interaction increasing B2R6D7 // TP53 interaction increasing B4DVN3 // TP53 interaction increasing NRDC // TP53 interaction increasing KDM1A // TP53 interaction increasing OBSL1 // TP53 interaction increasing MPDZ // TP53 interaction increasing HERC2 // T…	80	4377	-0.203408	0.0667705	-0.270179	0.69376	0.659173	-0.409484	0.389441	0.409875	0.00024588	-0.27327	0.711585	0.155062	0.0113961	3	no differential activity	TSG	TRUE
EZH2	EGFR	EGFR p.598	19	6797	0.67149	-0.00865231	0.680142	0.891236	0.809481	0.839984	0.763145	0.84022	0.000246281	0.682277	0.0678793	0.901104	0.0318714	4	activated in tumors	Oncogene	TRUE
GABPA	FBXW7	FBXW7 truncating	97	6806	0.288232	-0.00873901	0.296971	0.796776	0.783582	0.378902	0.372716	0.378992	0.00024703	0.294278	0.485851	0.0179102	0.031761	5	activated in tumors	TSG	TRUE
ELK1	ATM	ATM missense	359	6712	0.137965	-0.00259429	0.140559	0.748818	0.713094	0.196601	0.187708	0.197111	0.000247247	0.142347	0.317196	0.0478234	0.0151832	4	activated in tumors	TSG	TRUE
E2F7	PIK3CA	PIK3CA 3D hotspot 8-1058-4l1b	547	6014	-0.0890282	0.0230803	-0.112109	0.67448	0.617154	-0.180202	0.166215	0.181654	0.000248262	-0.102491	0.0147821	0.0350284	0.00858325	3	activated in tumors	Oncogene	TRUE
MYCN	STK11	STK11 missense	69	7032	0.338845	0.00734741	0.331498	0.851205	0.758205	0.436669	0.389445	0.437214	0.000248909	0.336531	0.0637472	0.00107629	0.00754992	3	activated in tumors	TSG	TRUE
HNF1A	ATM	ATM missense	359	6712	-0.0916942	0.00368665	-0.0953809	0.515572	0.503745	-0.189116	0.185	0.189343	0.000249161	-0.100345	0.0172366	0.235807	0.0151832	4	deactivated in tumors	TSG	TRUE
ETS1	PBRM1	PBRM1 truncating	183	6866	0.229532	-0.00246835	0.232	0.611162	0.808282	0.288629	0.379605	0.287028	0.00024926	0.221174	0.621856	0.00745421	0.00934725	5	activated in tumors	TSG	TRUE
GABPA	HRAS	HRAS 3D hotspot 1-166-4nyj	69	7081	0.347273	-0.00174969	0.349023	0.697081	0.783918	0.445673	0.500692	0.445229	0.00024996	0.347091	0.377988	0.0657435	0.00171313	4	activated in tumors	Oncogene	TRUE
ATF1	PIK3CA	PIK3CA p.H1047R	208	6014	-0.179616	0.0317049	-0.211321	0.795344	0.757201	-0.278603	0.265697	0.279081	0.00025015	-0.19749	1.58207e-05	0.295339	0.0085927	4	activated in tumors	Oncogene	TRUE
HNF1A	BRAF	BRAF interaction increasing MAP2K1 // BRAF p.V600E	457	6510	-0.0911492	0.00732942	-0.0984786	0.496228	0.506112	-0.194826	0.198454	0.194579	0.000250432	-0.0903643	0.0219891	0.299065	0.00296581	4	deactivated in tumors	Oncogene	TRUE
PBX1	MTOR	MTOR missense	244	6901	-0.147766	0.0130312	-0.160797	0.635616	0.661265	-0.243482	0.252979	0.243166	0.000250968	-0.157711	0.0195599	0.00626609	0.0501935	3	deactivated in tumors	Oncogene	FALSE
CREB1	PRDM1	PRDM1 missense	95	7054	0.325776	0.00973118	0.316045	0.936129	0.859141	0.36741	0.337609	0.367862	0.00025249	0.325567	0.00903683	0.152013	0.0378735	3	activated in tumors	TSG	TRUE
E2F4	ARID1A	ARID1A p.G1465fs // ARID1A p.G1631fs // ARID1A p.G1848fs	27	6602	0.466978	0.00706863	0.459909	0.483207	0.680877	0.676124	0.951786	0.675466	0.000252888	0.479908	0.000575116	0.000585517	0.0124426	2	activated in tumors	TSG	TRUE
FOXI1	BRAF	BRAF missense	624	6510	0.143493	0.0191465	0.124346	0.725157	0.764593	0.163349	0.171475	0.16263	0.00025484	0.117061	0.0123398	0.0978792	0.00299239	5	deactivated in tumors	Oncogene	TRUE
NFKB1	KEAP1	KEAP1 truncating	35	6941	-0.45047	0.0183671	-0.468837	0.622228	0.748867	-0.626535	0.753482	0.626062	0.000254965	-0.464087	0.467031	0.00785908	0.00351227	4	no differential activity	Oncogene	TRUE
HNF1A	BRAF	BRAF hotspot T599	494	6510	-0.0864202	0.00732942	-0.0937496	0.500138	0.506112	-0.185388	0.187448	0.185235	0.000255323	-0.0869515	0.0287247	0.319912	0.00299239	4	deactivated in tumors	Oncogene	TRUE
E2F1	DNMT1	DNMT1 missense	119	7015	0.225263	0.0138747	0.211388	0.6657	0.635449	0.332392	0.317543	0.33266	0.000255679	0.215036	0.0224649	0.000501146	0.0104551	1	activated in tumors	Oncogene	TRUE
JUND	KRAS	KRAS p.G13C	10	6615	0.687515	-0.0107912	0.698307	0.853137	0.600997	1.16111	0.818516	1.16191	0.000255944	0.695899	0.0035524	0.238995	0.0076339	4	deactivated in tumors	Oncogene	TRUE
E2F4	APC	APC missense	351	6511	0.137046	0.00628258	0.130764	0.747579	0.686437	0.189598	0.174916	0.190496	0.00025645	0.138496	0.00146162	0.000260039	0.05215	3	activated in tumors	TSG	FALSE
ESR1	RHOA	RHOA interface MPRIP	5	7089	-1.20659	0.0213172	-1.22791	1.05478	0.745352	-1.64696	1.16414	1.64743	0.00025654	-1.21969	0.303471	0.0320013	0.317468	2	deactivated in tumors	Oncogene	FALSE
E2F4	B2M	B2M p.L13fs	21	7073	0.551343	0.0117257	0.539617	0.510684	0.690281	0.782235	1.05666	0.781735	0.000256569	0.550566	0.00089992	9.17793e-05	0.021034	3	activated in tumors	TSG	TRUE
E2F1	PLCG1	PLCG1 missense	103	7047	0.24235	0.0136889	0.228661	0.692609	0.634732	0.35976	0.330145	0.360249	0.000257266	0.230493	0.0317651	0.000432226	0.0192949	2	activated in tumors	Oncogene	TRUE
PBX1	B2M	B2M p.L13fs	21	7073	-0.519883	0.0093977	-0.529281	0.810152	0.65873	-0.802907	0.65331	0.803487	0.00025742	-0.526437	0.0208904	0.00636701	0.021034	5	deactivated in tumors	TSG	TRUE
SMAD3	STK11	STK11 p.G279fs	6	7032	-1.24447	0.0246392	-1.26911	0.5894	0.828691	-1.53173	2.15322	1.53146	0.00025799	-1.23515	0.000149037	0.000296611	0.00754992	3	deactivated in tumors	TSG	TRUE
E2F7	B2M	B2M truncating	55	7073	0.316252	0.0123268	0.303925	0.523414	0.626425	0.48573	0.58066	0.485174	0.00025888	0.309425	0.0238641	0.00324962	0.021034	4	activated in tumors	TSG	TRUE
PBX1	AXIN2	AXIN2 p.G665fs	24	7041	-0.494134	0.0104473	-0.504581	0.668136	0.658709	-0.765979	0.755207	0.766015	0.000259265	-0.492439	0.0320552	0.00938261	0.00648162	5	deactivated in tumors	TSG	TRUE
PPARA	MAP3K1	MAP3K1 truncating	87	6974	-0.326678	-0.00434392	-0.322334	0.959245	0.787611	-0.408055	0.336029	0.409255	0.000259665	-0.312957	0.114645	0.490813	0.0119845	3	deactivated in tumors	TSG	TRUE
FOXM1	TP53	TP53 p.270	11	4377	0.560664	-0.0786171	0.639281	0.561533	0.571004	1.11962	1.13846	1.11957	0.000259869	0.626562	0.00860425	7.89112e-12	0.0120064	2	activated in tumors	TSG	TRUE
E2F1	CYLD	CYLD missense	85	7052	0.2655	0.0144174	0.251082	0.671181	0.635794	0.394646	0.37409	0.394911	0.000261427	0.253428	0.0286421	0.000388735	0.0266388	3	activated in tumors	TSG	TRUE
GATA3	CDH1	CDH1 truncating	122	6863	0.267376	0.0230826	0.244294	0.796983	0.700656	0.34778	0.306523	0.348664	0.000261547	0.235617	0.083168	0.102721	0.00784641	4	deactivated in tumors	TSG	TRUE
E2F1	TP53	TP53 Stability uniprot = D	218	4377	0.111505	-0.0480138	0.159518	0.620415	0.62954	0.253561	0.257116	0.253389	0.00026158	0.159059	0.035478	3.02586e-07	0.0120107	2	activated in tumors	TSG	TRUE
FOXM1	TP53	TP53 p.216	18	4377	0.385666	-0.0786171	0.464283	0.631649	0.571004	0.812747	0.735033	0.813099	0.000261608	0.49036	0.00978438	8.44509e-12	0.0120107	2	activated in tumors	TSG	TRUE
SPI1	HSPA8	HSPA8 interface BAG2	6	7068	1.16344	0.00499803	1.15844	0.817033	0.771407	1.50166	1.41786	1.50172	0.000263656	1.14966	0.0176871	0.0558717	0.013842	4	activated in tumors	Oncogene	TRUE
MYB	HRAS	HRAS interface RIN1	47	7081	-0.415995	-0.00437647	-0.411619	0.770011	0.767063	-0.536603	0.534562	0.536616	0.000263748	-0.409861	0.281602	0.90305	0.00179775	5	deactivated in tumors	Oncogene	TRUE
MYCN	SF3B1	SF3B1 p.K700E	13	7000	-0.775824	0.0163515	-0.792176	0.657123	0.759106	-1.04379	1.20552	1.04356	0.000263908	-0.768944	0.0634434	0.001901	0.0624517	4	activated in tumors	Oncogene	FALSE
NRF1	TP53	TP53 p.163	30	4377	0.396851	-0.104357	0.501208	0.794914	0.739101	0.677782	0.630519	0.678132	0.000264894	0.492441	0.00539915	3.81284e-09	0.0121234	6	activated in tumors	TSG	TRUE
NRF1	TP53	TP53 p.262	9	4377	0.757951	-0.104357	0.862308	0.977802	0.739101	1.1659	0.881884	1.1667	0.000266153	0.896851	0.00366814	3.64721e-09	0.012143	6	activated in tumors	TSG	TRUE
NRF1	TP53	TP53 p.G262V	9	4377	0.757951	-0.104357	0.862308	0.977802	0.739101	1.1659	0.881884	1.1667	0.000266153	0.896851	0.00366814	3.64721e-09	0.012143	6	activated in tumors	TSG	TRUE
ETS1	MSH6	MSH6 p.T1085fs // MSH6 p.T783fs // MSH6 p.T955fs	26	7000	0.569553	0.00015126	0.569401	0.878985	0.803526	0.708381	0.647794	0.708629	0.000266361	0.576621	0.728671	0.00327557	0.00256117	6	activated in tumors	TSG	TRUE
GATA2	BRAF	BRAF missense	624	6510	0.124897	0.00299379	0.121903	0.732306	0.782414	0.156654	0.166464	0.155803	0.000266609	0.119313	0.600368	0.016435	0.00310856	5	activated in tumors	Oncogene	TRUE
NFKB1	STK11	STK11 truncating	61	7032	-0.346045	0.0125029	-0.358548	0.834048	0.75073	-0.477126	0.429889	0.477599	0.000267022	-0.352378	0.556065	0.00307806	0.00754992	3	no differential activity	TSG	TRUE
MYB	CTNNB1	CTNNB1 p.33	39	6783	0.438341	-0.0120939	0.450435	0.804423	0.765796	0.588022	0.559948	0.588192	0.00026992	0.44836	0.211713	0.594534	0.0123429	4	deactivated in tumors	Oncogene	TRUE
RARA	BRAF	BRAF hotspot T599	494	6510	-0.125496	0.00165638	-0.127153	0.820965	0.778474	-0.162695	0.154882	0.163336	0.000270074	-0.133883	0.176988	0.395022	0.00313281	2	deactivated in tumors	Oncogene	TRUE
HNF1A	NFE2L2	NFE2L2 p.34	25	6974	0.368237	-0.00731328	0.37555	0.445933	0.504711	0.74437	0.842167	0.74409	0.000270346	0.368552	0.0808619	0.406979	0.0479297	2	deactivated in tumors	Oncogene	TRUE
CEBPB	FGFR3	FGFR3 interface FGF8 // FGFR3 3D hotspot 150-357-2fdb	26	7059	-0.548157	0.00271475	-0.550872	0.979106	0.780617	-0.704976	0.562628	0.705688	0.000270726	-0.559702	0.000913541	0.823684	0.00730961	5	deactivated in tumors	Oncogene	TRUE
E2F6	ARID1A	ARID1A missense	193	6602	0.210812	-9.40851e-05	0.210906	0.793653	0.803873	0.262456	0.265741	0.262363	0.000270757	0.21419	0.285423	0.349093	0.0124426	2	activated in tumors	TSG	TRUE
SMAD3	GATA3	GATA3 truncating	107	6972	-0.232997	0.0225052	-0.255502	0.918648	0.830915	-0.306984	0.278129	0.307495	0.000271297	-0.29604	4.98218e-05	2.44253e-05	0.005736	1	deactivated in tumors	TSG	TRUE
MYCN	ARID1A	ARID1A missense	193	6602	0.206291	0.00977837	0.196513	0.876034	0.753223	0.259605	0.224321	0.260896	0.000271475	0.20159	0.0565395	0.00485248	0.0124426	4	activated in tumors	TSG	TRUE
E2F7	TP53	TP53 hotspot T155	173	4377	0.142009	-0.0438711	0.18588	0.614869	0.63579	0.292719	0.302308	0.29236	0.0002722	0.179355	0.00692434	0.000128963	0.0123802	3	activated in tumors	TSG	TRUE
YY1	STK11	STK11 missense	69	7032	0.353594	0.00229425	0.3513	0.903105	0.793095	0.44232	0.388991	0.442948	0.000272611	0.349966	0.857985	0.00431877	0.00754992	4	activated in tumors	TSG	TRUE
YY1	CTNNB1	CTNNB1 missense	354	6783	0.162237	0.00120803	0.161029	0.775829	0.796781	0.20236	0.207558	0.2021	0.000272686	0.158174	0.96989	0.0023571	0.0123429	3	activated in tumors	Oncogene	TRUE
MYCN	CTNNB1	CTNNB1 hotspot S33	155	6783	0.227194	0.00674136	0.220453	0.760343	0.757359	0.291056	0.289939	0.291081	0.000274076	0.223837	0.0770803	0.000448688	0.0123429	3	activated in tumors	Oncogene	TRUE
MYCN	CTNNB1	CTNNB1 interface FBXW11	155	6783	0.227194	0.00674136	0.220453	0.760343	0.757359	0.291056	0.289939	0.291081	0.000274076	0.223837	0.0770803	0.000448688	0.0123429	3	activated in tumors	Oncogene	TRUE
E2F7	KRAS	KRAS p.12	371	6615	-0.110747	0.0206075	-0.131355	0.648637	0.624847	-0.209788	0.202509	0.210219	0.00027424	-0.122075	0.0331464	0.00427968	0.0080253	4	activated in tumors	Oncogene	TRUE
FOXI1	CTNNB1	CTNNB1 hotspot T41	147	6783	-0.200447	0.0354144	-0.235862	0.651185	0.765377	-0.309064	0.362204	0.308164	0.000275644	-0.231467	0.00758263	0.140939	0.0123429	5	deactivated in tumors	Oncogene	TRUE
BACH1	HRAS	HRAS 3D hotspot 1-166-4nyj	69	7081	-0.306792	0.0261146	-0.332907	0.829641	0.753897	-0.441139	0.401266	0.441582	0.000276925	-0.332067	0.0461815	0.744506	0.00187731	4	no differential activity	Oncogene	TRUE
E2F6	FN1	FN1 missense	223	6911	0.205703	0.00592031	0.199783	0.814212	0.806379	0.247678	0.24537	0.247753	0.000277465	0.200317	0.441046	0.18154	0.0118914	4	activated in tumors	TSG	TRUE
CREB1	NRAS	NRAS p.Q61K	57	6936	0.43063	0.00492123	0.425708	0.899585	0.859242	0.495256	0.473227	0.495447	0.000278302	0.415841	0.0334488	0.14235	0.00569387	4	activated in tumors	Oncogene	TRUE
EZH2	CASP8	CASP8 missense	92	7006	-0.311525	0.00400764	-0.315533	0.983426	0.812666	-0.387117	0.32085	0.388268	0.000278569	-0.311253	0.125913	0.656243	0.0125356	4	activated in tumors	TSG	TRUE
GLI2	ATM	ATM truncating	125	6712	-0.239198	0.0142061	-0.253404	0.728158	0.751121	-0.337552	0.348007	0.337368	0.000278814	-0.246358	0.000550846	0.789213	0.0159908	5	deactivated in tumors	TSG	TRUE
PAX6	RUNX1	RUNX1 truncating	37	7043	0.434941	0.00208394	0.432857	0.817249	0.721051	0.59988	0.529651	0.600314	0.000279439	0.432697	0.0150577	0.317007	0.0378639	4	deactivated in tumors	TSG	TRUE
NRF1	HRAS	HRAS interface RASA1	69	7081	-0.347687	-0.00481366	-0.342874	0.531294	0.788774	-0.435826	0.645356	0.434692	0.000280066	-0.345175	0.00627716	1.33418e-07	0.00188834	5	activated in tumors	Oncogene	TRUE
MEF2A	CTNNB1	CTNNB1 interface HLA-A	154	6783	-0.242978	0.00359725	-0.246575	0.666739	0.842371	-0.293929	0.369823	0.292716	0.00028031	-0.248328	0.68751	0.000244406	0.0124334	5	no differential activity	Oncogene	TRUE
GATA2	PIK3R1	PIK3R1 p.T213fs // PIK3R1 p.T276fs // PIK3R1 p.T306fs // PIK3R1 p.T576fs	6	6916	1.17174	0.0115289	1.16021	1.21273	0.779097	1.48841	0.956693	1.48918	0.000280667	1.15694	0.45138	0.0426073	0.121038	5	activated in tumors	TSG	FALSE
PPARD	KRAS	KRAS interaction decreasing RASSF2 // KRAS interaction disrupting RASSF2 // KRAS p.G12V	112	6615	0.233585	-0.0158793	0.249464	0.68047	0.686972	0.363192	0.366605	0.363135	0.000282518	0.237976	0.0825278	0.00210732	0.00805602	4	deactivated in tumors	Oncogene	TRUE
E2F6	ARHGAP35	ARHGAP35 missense	149	6934	0.246825	0.00628013	0.240545	0.793068	0.807807	0.297888	0.30331	0.297776	0.00028465	0.242954	0.422479	0.140985	0.0640462	3	activated in tumors	TSG	FALSE
ATF1	PIK3CA	PIK3CA 3D hotspot 2-1061-4jps	543	6014	-0.109126	0.0317049	-0.140831	0.782742	0.757201	-0.185463	0.179919	0.185988	0.000284848	-0.124226	7.64483e-06	0.0266415	0.00968568	4	activated in tumors	Oncogene	TRUE
ATF3	SMAD4	SMAD4 inframe indel	5	6912	1.28678	0.00459095	1.28219	0.76438	0.789707	1.62365	1.67742	1.62363	0.000285176	1.28273	0.883214	0.531261	0.246603	3	no differential activity	TSG	FALSE
SMAD4	HRAS	HRAS 3D hotspot 1-166-4nym	54	7081	-0.360087	0.014129	-0.374216	0.704353	0.752066	-0.497812	0.531291	0.497585	0.000285363	-0.37229	0.000101644	0.0379478	0.00191371	3	deactivated in tumors	Oncogene	TRUE
ATF4	PIK3CA	PIK3CA p.547	7	6014	-1.10347	0.0109602	-1.11443	0.759079	0.815221	-1.36712	1.46813	1.36703	0.000285607	-1.11913	0.107215	0.685911	0.00968568	4	activated in tumors	Oncogene	TRUE
ESR2	KRAS	KRAS interface ZDHHC17	400	6615	0.157169	0.00353665	0.153632	0.8782	0.854604	0.179485	0.17494	0.17977	0.000285679	0.160604	0.00823331	0.00935991	0.00805602	3	deactivated in tumors	Oncogene	TRUE
TCF3	AXIN1	AXIN1 truncating	33	7061	-0.520497	0.0204679	-0.540965	0.84878	0.844484	-0.640571	0.637344	0.640586	0.000285792	-0.534729	0.0159085	0.359145	0.00918618	5	deactivated in tumors	TSG	TRUE
E2F1	MSH2	MSH2 missense	80	7053	0.271311	0.014963	0.256348	0.610021	0.636341	0.403028	0.420228	0.402847	0.000287181	0.259244	0.0339643	0.000357108	0.107693	2	activated in tumors	TSG	FALSE
HIF1A	DNMT1	DNMT1 p.K130fs	16	7015	-0.624981	0.0142178	-0.639199	1.5821	0.69859	-0.91098	0.40402	0.914985	0.000287216	-0.637363	0.675085	0.650596	0.0104551	2	activated in tumors	Oncogene	TRUE
TP63	SMAD4	SMAD4 truncating	48	6912	0.371787	0.00937513	0.362412	0.77898	0.677597	0.534268	0.465239	0.534848	0.000287288	0.356896	0.877194	0.106463	0.246603	4	deactivated in tumors	TSG	FALSE
ZEB1	TP53	TP53 p.R280G	5	4377	-0.996656	0.0244498	-1.02111	0.701059	0.619732	-1.64745	1.45652	1.64766	0.000288267	-1.00659	0.133238	0.0317237	0.0130702	3	no differential activity	TSG	TRUE
ELK1	HRAS	HRAS 3D hotspot 5-164-1bkd	53	7081	0.356872	0.000784534	0.356088	0.631218	0.715323	0.498202	0.564128	0.4978	0.000288529	0.3574	0.385737	0.0672401	0.0019246	3	activated in tumors	Oncogene	TRUE
MYCN	CYLD	CYLD missense	85	7052	0.310435	0.0113947	0.299041	0.77261	0.760654	0.393063	0.387053	0.393137	0.000289701	0.30091	0.0800226	0.000753561	0.0266388	5	activated in tumors	TSG	TRUE
FOXM1	PIK3CA	PIK3CA 3D hotspot 8-1050-2rd0	83	6014	-0.210283	0.0243339	-0.234617	0.646955	0.567746	-0.412416	0.362648	0.413243	0.00028979	-0.228084	0.0127465	0.0826526	0.00976534	3	activated in tumors	Oncogene	TRUE
E2F1	HSPA8	HSPA8 missense	84	7068	0.265453	0.0144391	0.251014	0.716449	0.63457	0.394937	0.350359	0.395566	0.000290413	0.252758	0.0319756	0.000432307	0.0138606	3	activated in tumors	Oncogene	TRUE
ESR2	MAP3K1	MAP3K1 truncating	87	6974	0.358502	0.00822483	0.350277	0.760317	0.857003	0.409254	0.460698	0.408723	0.000290925	0.336171	0.0197049	0.0214558	0.0124682	4	deactivated in tumors	TSG	TRUE
E2F4	TRIO	TRIO p.H2348fs	9	6905	0.776427	0.00662212	0.769805	0.627412	0.687124	1.12044	1.22695	1.12033	0.00029116	0.830038	0.000126287	4.46522e-05	0.00997547	4	activated in tumors	Oncogene	TRUE
HSF1	FBXW7	FBXW7 missense	271	6806	0.158578	0.00365211	0.154926	0.661217	0.695695	0.223104	0.234304	0.222692	0.000291719	0.156412	0.909647	0.211413	0.0350062	3	activated in tumors	TSG	TRUE
JUN	DNMT1	DNMT1 p.K130fs	16	7015	-0.645808	0.011487	-0.657295	0.800974	0.716075	-0.917668	0.82062	0.917914	0.000291993	-0.649574	0.219098	0.0265669	0.0104551	3	deactivated in tumors	Oncogene	TRUE
E2F1	TRIO	TRIO p.H2348fs	9	6905	0.733652	0.0109003	0.722752	0.501769	0.63455	1.13925	1.44041	1.139	0.000292614	0.766668	0.00941121	0.00010727	0.00997547	3	activated in tumors	Oncogene	TRUE
FOXO3	TP53	TP53 p.S109fs // TP53 p.S148fs // TP53 p.S241fs	7	4377	-1.04182	0.0607737	-1.10259	0.948158	0.832486	-1.32419	1.16288	1.32446	0.00029356	-1.14089	0.311801	0.00073788	0.013269	2	deactivated in tumors	TSG	TRUE
ESR2	CTNNB1	CTNNB1 missense	354	6783	-0.15684	0.0204829	-0.177322	0.820815	0.857382	-0.207247	0.216032	0.206818	0.000295216	-0.169078	0.0237575	0.0103536	0.0129722	2	deactivated in tumors	Oncogene	TRUE
HIF1A	NEDD4L	NEDD4L missense	78	7072	0.30189	0.0118892	0.290001	0.879468	0.700789	0.412545	0.329746	0.413821	0.000295682	0.289939	0.839061	0.697661	0.133057	3	activated in tumors	Oncogene	FALSE
MEF2A	EP300	EP300 p.Q2321fs	11	6892	-0.934017	-0.00358774	-0.93043	0.930595	0.835331	-1.11365	0.999823	1.11385	0.000296396	-0.912102	0.588899	0.000231715	0.0169992	5	no differential activity	TSG	TRUE
ESR1	TP53	TP53 p.273	215	4377	-0.0762003	0.0908228	-0.167023	0.614765	0.707762	-0.23735	0.271686	0.235988	0.000296728	-0.17744	0.0276153	1.00812e-08	0.0133708	3	deactivated in tumors	TSG	TRUE
FOS	PPP2R1A	PPP2R1A p.256	6	7045	0.99764	0.0185852	0.979055	0.721998	0.675538	1.44922	1.35604	1.4493	0.000297386	0.999139	0.0177482	0.652649	0.191985	4	activated in tumors	Oncogene	FALSE
NR1I2	HRAS	HRAS hotspot Y64	30	7081	0.507004	-0.000747919	0.507752	0.71508	0.768248	0.661103	0.710063	0.660922	0.000298133	0.508726	0.810016	0.887513	0.00197808	4	deactivated in tumors	Oncogene	TRUE
RELA	CTNNB1	CTNNB1 hotspot T41	147	6783	-0.200665	0.0122758	-0.212941	0.615799	0.711848	-0.299935	0.345797	0.299139	0.000298576	-0.214107	0.321574	0.00251296	0.0129984	2	no differential activity	Oncogene	TRUE
E2F1	B2M	B2M p.L13fs	21	7073	0.510564	0.01559	0.494974	0.499309	0.636181	0.778462	0.991319	0.77804	0.000299111	0.502289	0.0307107	0.000478019	0.0224333	3	activated in tumors	TSG	TRUE
ZEB1	TP53	TP53 interface TP53BP2	568	4377	-0.0760174	0.0244498	-0.100467	0.671638	0.619732	-0.160515	0.149585	0.162114	0.000299178	-0.100983	0.345754	0.0146844	0.0134397	3	no differential activity	TSG	TRUE
MYCN	EGFR	EGFR p.750del	18	6797	-0.637278	0.0182697	-0.655547	1.138	0.75503	-0.866866	0.576054	0.868241	0.000299578	-0.645355	0.103276	0.00259694	0.037661	2	activated in tumors	Oncogene	TRUE
PBX1	NCOR2	NCOR2 p.R1067fs	5	6980	-1.03879	0.0120269	-1.05081	0.745297	0.659479	-1.59327	1.40992	1.5934	0.000300724	-1.06624	0.0115729	0.00597072	0.0150362	4	deactivated in tumors	Oncogene	TRUE
RARA	BRAF	BRAF p.600	460	6510	-0.127677	0.00165638	-0.129333	0.822063	0.778474	-0.165511	0.157328	0.166137	0.00030308	-0.137411	0.144081	0.418421	0.00349774	2	deactivated in tumors	Oncogene	TRUE
ELK1	TP53	TP53 p.G108fs	6	4377	0.966588	-0.0391416	1.00573	0.705107	0.687613	1.46259	1.42635	1.46264	0.000304006	1.01572	0.911823	0.129607	0.0136147	3	activated in tumors	TSG	TRUE
GABPA	TP53	TP53 inframe indel	64	4377	0.288211	-0.0556262	0.343837	0.686059	0.759521	0.453295	0.501177	0.452702	0.000305058	0.34498	0.114039	0.0177469	0.01362	4	activated in tumors	TSG	TRUE
ELK1	PTEN	PTEN p.R130G	27	6484	-0.496314	0.0117214	-0.508036	0.504632	0.713021	-0.713223	1.00674	0.712512	0.000305637	-0.497414	0.311219	0.399949	0.0352189	4	activated in tumors	TSG	TRUE
HIF1A	PTEN	PTEN p.T321fs	10	6484	0.790491	0.00308346	0.787407	0.69747	0.690557	1.14023	1.12895	1.14025	0.000305807	0.789643	0.43996	0.818608	0.0352189	2	activated in tumors	TSG	TRUE
FOXM1	TP53	TP53 p.239	15	4377	0.441917	-0.0786171	0.520534	0.651106	0.571004	0.911176	0.799461	0.911612	0.000306087	0.530796	0.0101404	4.56571e-12	0.0136243	2	activated in tumors	TSG	TRUE
SMAD4	ATM	ATM missense	359	6712	-0.13852	0.0195221	-0.158042	0.776246	0.747966	-0.210885	0.203598	0.211296	0.000306795	-0.146798	0.000424702	0.0149023	0.0166033	2	deactivated in tumors	TSG	TRUE
MAX	CTNND1	CTNND1 interface CDH1	5	7052	1.2695	0.00353025	1.26597	1.40926	0.771316	1.64022	0.898319	1.64131	0.000307966	1.24574	0.273642	0.000433571	0.0382491	3	activated in tumors	TSG	TRUE
PAX6	MSH6	MSH6 truncating	61	7000	-0.330815	0.0109104	-0.341726	0.805206	0.718986	-0.474775	0.424395	0.475288	0.000309158	-0.334292	0.0189224	0.284313	0.0028758	6	deactivated in tumors	TSG	TRUE
SPI1	GATA3	GATA3 truncating	107	6972	-0.252066	0.00961242	-0.261678	0.656846	0.771773	-0.339763	0.398386	0.339061	0.000309778	-0.271838	0.0100574	0.0321854	0.00632374	3	activated in tumors	TSG	TRUE
CREB1	MMP2	MMP2 missense	87	7064	0.342806	0.010433	0.332373	0.952499	0.859246	0.386288	0.348949	0.38682	0.000310312	0.334775	0.0142539	0.129356	0.015812	3	activated in tumors	Oncogene	TRUE
CEBPA	HNF1A	HNF1A p.G171fs // HNF1A p.G288fs	16	7095	0.627338	0.00324879	0.624089	0.649874	0.685851	0.910046	0.960322	0.909948	0.000312706	0.61938	0.619812	0.414677	0.0269969	4	deactivated in tumors	TSG	TRUE
FOXM1	CTNNB1	CTNNB1 interface HLA-A	154	6783	-0.15692	0.0154666	-0.172387	0.594384	0.576352	-0.29889	0.290025	0.299099	0.000312837	-0.169274	0.0244014	1.26454e-05	0.0134943	2	activated in tumors	Oncogene	TRUE
NRF1	ARID1A	ARID1A p.G1465fs // ARID1A p.G1631fs // ARID1A p.G1848fs	27	6602	-0.570582	-0.00536621	-0.565216	0.81456	0.785568	-0.719393	0.693891	0.719499	0.000312852	-0.545884	0.00685176	1.2743e-05	0.0135844	6	activated in tumors	TSG	TRUE
CEBPA	BRAF	BRAF hotspot T599	494	6510	0.109991	-0.00148932	0.111481	0.660562	0.686414	0.162834	0.168766	0.16241	0.000313419	0.116039	0.155285	0.355135	0.0035987	4	deactivated in tumors	Oncogene	TRUE
HIF1A	KRAS	KRAS interface ZDHHC17	400	6615	0.130603	0.00291039	0.127692	0.764181	0.694282	0.182823	0.167097	0.18392	0.000314121	0.130288	0.441197	0.955528	0.0086999	4	activated in tumors	Oncogene	TRUE
MYCN	MSH6	MSH6 truncating	61	7000	0.350811	0.0107805	0.34003	0.840338	0.760255	0.446837	0.404635	0.447258	0.000314421	0.352804	0.0755689	0.000497086	0.0028758	3	activated in tumors	TSG	TRUE
TP53	MAP3K4	MAP3K4 missense	152	6954	0.220696	0.00297063	0.217726	0.842032	0.736965	0.294481	0.258571	0.295435	0.000314428	0.218608	0.694445	0.0757511	0.106119	2	deactivated in tumors	Oncogene	FALSE
PAX5	TP53	TP53 3D hotspot 96-288-2mej	501	4377	0.125178	-0.00928414	0.134462	0.785832	0.813979	0.165769	0.171107	0.165191	0.000315394	0.137934	0.0203641	0.184061	0.013992	3	deactivated in tumors	TSG	TRUE
BACH1	RAC1	RAC1 interface ARHGDIB	11	7108	0.834575	0.0206985	0.813877	0.702048	0.754102	1.07937	1.15929	1.07927	0.00031586	0.819926	0.0357737	0.852567	0.229098	4	no differential activity	Oncogene	FALSE
BACH1	RAC1	RAC1 interface ARHGDIA	11	7108	0.834575	0.0206985	0.813877	0.702048	0.754102	1.07937	1.15929	1.07927	0.00031586	0.819926	0.0357737	0.852567	0.229098	4	no differential activity	Oncogene	FALSE
E2F7	MMP2	MMP2 missense	87	7064	0.252263	0.011606	0.240657	0.519389	0.626871	0.384628	0.463347	0.383902	0.000316239	0.243018	0.0257076	0.00266235	0.015812	4	activated in tumors	Oncogene	TRUE
NRF1	TP53	TP53 p.135	20	4377	0.486919	-0.104357	0.591277	0.732704	0.739101	0.800024	0.806979	0.799994	0.000316265	0.594415	0.0031792	5.67267e-09	0.013992	6	activated in tumors	TSG	TRUE
E2F1	MET	MET missense	157	6986	0.197404	0.012877	0.184527	0.715631	0.633675	0.290329	0.257852	0.291201	0.000316868	0.18468	0.030919	0.000336559	0.065522	3	activated in tumors	Oncogene	FALSE
STAT2	PIK3CA	PIK3CA truncating	33	6014	0.509672	-0.0096482	0.519321	0.840738	0.811099	0.640141	0.617696	0.640267	0.000316933	0.51031	0.157332	0.00650032	0.0106129	4	activated in tumors	Oncogene	TRUE
ETS1	NRAS	NRAS interface RASA1	204	6936	0.20596	-0.00153391	0.207494	0.715946	0.804453	0.258698	0.289818	0.257932	0.000317413	0.205331	0.493003	0.00516088	0.00635589	4	activated in tumors	Oncogene	TRUE
AR	SMARCA4	SMARCA4 truncating	30	6895	-0.50905	0.0297949	-0.538844	0.702952	0.814715	-0.661744	0.766545	0.66139	0.000317792	-0.536187	0.000358514	0.149562	0.00725396	2	activated in tumors	TSG	TRUE
ELK1	PTEN	PTEN truncating	325	6484	-0.139845	0.0117214	-0.151566	0.703235	0.713021	-0.212707	0.215527	0.212569	0.000319472	-0.146407	0.539458	0.164054	0.0352189	4	activated in tumors	TSG	TRUE
PPARG	TP53	TP53 3D hotspot 97-287-1ycs	581	4377	-0.0668309	0.0505728	-0.117404	0.74047	0.742127	-0.15824	0.158553	0.158199	0.000321494	-0.117899	0.259757	0.0232684	0.0141694	2	deactivated in tumors	TSG	TRUE
GABPA	TP53	TP53 interface BCL2	434	4377	0.0878325	-0.0556262	0.143459	0.835865	0.759521	0.18711	0.171629	0.18888	0.000322214	0.138956	0.138944	0.012975	0.0141694	4	activated in tumors	TSG	TRUE
PBX1	FBXW7	FBXW7 missense	271	6806	-0.1346	0.014618	-0.149218	0.728703	0.656392	-0.226329	0.204773	0.227331	0.000323002	-0.147306	0.0462045	0.00476594	0.0363378	4	deactivated in tumors	TSG	TRUE
CREB1	ATM	ATM p.R337C	12	6712	0.884868	0.00286756	0.882	0.728754	0.858481	1.02763	1.21028	1.0274	0.000323552	0.892088	0.00349694	0.225815	0.0166033	3	activated in tumors	TSG	TRUE
SMAD3	STK11	STK11 interface SNRK	8	7032	-1.03812	0.0246392	-1.06276	1.49479	0.828691	-1.28102	0.710975	1.28245	0.000324241	-1.05368	0.000183383	0.000276374	0.00868047	3	deactivated in tumors	TSG	TRUE
PPARD	TP53	TP53 hotspot S183	130	4377	-0.173368	0.0449838	-0.218352	0.627066	0.684973	-0.319516	0.348212	0.318774	0.000324267	-0.218678	0.285649	0.00350187	0.0142168	4	deactivated in tumors	TSG	TRUE
PPARG	KEAP1	KEAP1 missense	188	6941	-0.182997	0.0173162	-0.200313	0.796446	0.748575	-0.267131	0.251509	0.267593	0.000324483	-0.199829	0.343453	0.271068	0.00438052	4	deactivated in tumors	Oncogene	TRUE
ATF1	PTEN	PTEN p.R130G	27	6484	-0.541122	0.0207346	-0.561856	0.71625	0.755641	-0.7437	0.784441	0.743549	0.000324705	-0.524312	5.49438e-06	0.0178372	0.0352189	2	activated in tumors	TSG	TRUE
PPARG	JAK3	JAK3 missense	123	7027	-0.226182	0.0171853	-0.243367	0.789512	0.748347	-0.324893	0.30825	0.325206	0.000324865	-0.245264	0.267233	0.25367	0.0609123	4	deactivated in tumors	Oncogene	FALSE
STAT1	DNMT1	DNMT1 p.K130fs	16	7015	-0.711794	0.0172042	-0.728999	1.02689	0.79876	-0.912028	0.709908	0.912663	0.000325197	-0.719001	0.918115	0.000449562	0.0104551	2	deactivated in tumors	Oncogene	TRUE
FOS	HIF1A	HIF1A interface ARNTL	9	7094	0.834006	0.0174548	0.816551	0.74971	0.675214	1.20916	1.08916	1.20932	0.000328196	0.809424	0.0267481	0.932555	0.0303095	2	activated in tumors	Oncogene	TRUE
IRF1	PIK3CA	PIK3CA p.C420R	16	6014	0.735837	-0.00847127	0.744309	1.01608	0.821078	0.905903	0.732531	0.906502	0.000329024	0.739036	0.729552	0.0423573	0.0109489	4	no differential activity	Oncogene	TRUE
SP1	HRAS	HRAS 3D hotspot 1-166-1bkd	72	7081	-0.299869	0.0152871	-0.315157	0.824098	0.738274	-0.426362	0.382426	0.426883	0.000329208	-0.314617	0.675786	0.363221	0.0021727	3	no differential activity	Oncogene	TRUE
MAX	FUBP1	FUBP1 p.R430C // FUBP1 p.430	6	7052	1.11425	0.00495386	1.1093	0.650004	0.773568	1.43415	1.7066	1.434	0.000330224	1.13406	0.277573	0.000355399	0.0371502	4	activated in tumors	TSG	TRUE
ATF1	TP53	TP53 interface BCL2L1	418	4377	0.097938	-0.0329488	0.130887	0.766309	0.74829	0.174545	0.170802	0.174915	0.000330609	0.137647	9.78296e-07	0.00340453	0.0144515	2	activated in tumors	TSG	TRUE
ESR1	HRAS	HRAS interface SOS2	69	7081	-0.300303	0.0248029	-0.325106	0.780242	0.744719	-0.436346	0.416674	0.436549	0.000332106	-0.323567	0.340301	0.0442095	0.00218029	2	deactivated in tumors	Oncogene	TRUE
ATF3	NR4A2	NR4A2 missense	68	7068	0.345592	0.00133127	0.34426	0.788776	0.789609	0.435993	0.436449	0.435988	0.000332144	0.345583	0.913628	0.37873	0.00776881	3	no differential activity	TSG	TRUE
CREB1	TRIO	TRIO missense	222	6905	0.21134	0.00706362	0.204276	0.90614	0.858639	0.237489	0.225436	0.237907	0.000332461	0.210822	0.00566798	0.118205	0.0101047	4	activated in tumors	Oncogene	TRUE
STAT6	BRAF	BRAF interaction disrupting MAP2K1	469	6510	0.14616	-0.00308683	0.149247	0.77973	0.787305	0.189689	0.191409	0.189567	0.000333922	0.135835	0.071778	2.13296e-05	0.00381475	3	deactivated in tumors	Oncogene	TRUE
ATF1	PIK3CA	PIK3CA interface PIK3R1	580	6014	-0.103772	0.0317049	-0.135477	0.781247	0.757201	-0.178413	0.173411	0.178918	0.000333952	-0.119118	8.02454e-06	0.0207069	0.0110438	4	activated in tumors	Oncogene	TRUE
EZH2	GATA3	GATA3 truncating	107	6972	-0.276072	0.00179991	-0.277872	0.778264	0.815955	-0.340778	0.35704	0.340548	0.000335211	-0.286307	0.0817676	0.512547	0.00661482	5	activated in tumors	TSG	TRUE
HSF1	EGFR	EGFR interface PDGFRA	36	6797	-0.402223	0.0136671	-0.41589	0.69983	0.693749	-0.599456	0.594273	0.599483	0.000335524	-0.416408	0.576003	0.439154	0.0390025	3	activated in tumors	Oncogene	TRUE
PBX1	CDC73	CDC73 missense	78	7069	-0.266015	0.0103671	-0.276382	0.674711	0.659634	-0.418889	0.40963	0.418993	0.000335996	-0.269733	0.0206816	0.00529861	0.0738081	6	deactivated in tumors	Oncogene	FALSE
E2F4	EGFR	EGFR activitygain	33	6797	-0.436544	0.0155518	-0.452095	0.82327	0.685998	-0.658354	0.549146	0.659033	0.000336464	-0.429591	0.00142837	0.00033614	0.0390025	2	activated in tumors	Oncogene	TRUE
JUN	MLH1	MLH1 p.T254fs // MLH1 p.T397fs // MLH1 p.T495fs	10	7031	-0.81221	0.00925884	-0.821469	0.753035	0.716371	-1.14663	1.09088	1.14671	0.000336583	-0.813114	0.288879	0.0228553	0.0504875	3	deactivated in tumors	TSG	FALSE
FOXM1	NR4A2	NR4A2 p.N231fs // NR4A2 p.N294fs	5	7068	0.915394	0.00779636	0.907598	0.218065	0.577312	1.57249	4.16205	1.57211	0.000336648	0.924988	0.0135597	1.58914e-05	0.00776881	3	activated in tumors	TSG	TRUE
MYB	EGFR	EGFR 3D hotspot 25-638-3njp	74	6797	0.309586	-0.0138776	0.323464	0.616389	0.766236	0.42294	0.524772	0.422146	0.000336842	0.320853	0.174962	0.899216	0.0390025	4	deactivated in tumors	Oncogene	TRUE
ESR1	CASP8	CASP8 interface CASP7	11	7006	-0.780652	0.0261881	-0.80684	0.712273	0.744369	-1.08399	1.13277	1.08393	0.000337077	-0.805496	0.449456	0.0417467	0.0144462	2	deactivated in tumors	TSG	TRUE
RELA	FGFR3	FGFR3 interface FGF8 // FGFR3 3D hotspot 150-357-2fdb	26	7059	-0.508591	0.0058776	-0.514468	0.84437	0.706972	-0.727159	0.609293	0.727706	0.000338573	-0.498749	0.345989	0.00309325	0.00878989	4	no differential activity	Oncogene	TRUE
ESR1	HRAS	HRAS 3D hotspot 1-166-4nyj	69	7081	-0.300203	0.0248029	-0.325006	0.780183	0.744719	-0.436211	0.416576	0.436414	0.000340354	-0.322993	0.342289	0.0427309	0.00221767	2	deactivated in tumors	Oncogene	TRUE
SMAD3	KEAP1	KEAP1 truncating	35	6941	-0.493552	0.0322439	-0.525796	0.724402	0.826651	-0.636416	0.725835	0.636056	0.000341224	-0.501137	0.000242929	0.000584022	0.0045162	3	deactivated in tumors	Oncogene	TRUE
ETS1	HRAS	HRAS 3D hotspot 1-166-1nvw	57	7081	0.38242	-4.33748e-05	0.382464	0.671341	0.803825	0.476371	0.569702	0.475805	0.00034193	0.382389	0.571988	0.00433674	0.00221767	4	activated in tumors	Oncogene	TRUE
E2F7	KIT	KIT missense	228	6919	0.157313	0.0101187	0.147195	0.61079	0.625985	0.23532	0.240991	0.235141	0.000342008	0.150886	0.0220021	0.0028992	0.217152	3	activated in tumors	Oncogene	FALSE
PBX1	HRAS	HRAS interface SOS1 // HRAS 3D hotspot 1-166-1nvu // HRAS 3D hotspot 1-166-1nvv	73	7081	-0.271591	0.00957285	-0.281164	0.659978	0.660286	-0.425823	0.42602	0.425821	0.000343133	-0.278037	0.0118832	0.00923987	0.00221767	4	deactivated in tumors	Oncogene	TRUE
FOXM1	MLLT4	MLLT4 missense	126	7002	0.19215	0.00908887	0.183061	0.562226	0.578053	0.316835	0.3256	0.316685	0.000343711	0.185749	0.0229337	1.40456e-05	0.00736524	3	activated in tumors	TSG	TRUE
ATF4	TP53	TP53 p.K132N	16	4377	0.600437	-0.124476	0.724913	0.9364	0.818415	0.885285	0.774149	0.885752	0.000344072	0.732806	0.361619	2.52161e-07	0.0149951	3	activated in tumors	TSG	TRUE
ESR2	KRAS	KRAS p.12	371	6615	0.160573	0.00353665	0.157036	0.877483	0.854604	0.18349	0.178962	0.183753	0.000345793	0.164075	0.00868563	0.0103572	0.00940907	3	deactivated in tumors	Oncogene	TRUE
GLI2	B2M	B2M p.L13fs	21	7073	-0.590699	0.00678912	-0.597488	0.724334	0.754133	-0.792372	0.824879	0.792285	0.000346776	-0.589563	0.0011812	0.816962	0.0241504	6	deactivated in tumors	TSG	TRUE
MEF2A	DNMT1	DNMT1 p.K130fs	16	7015	-0.759097	-0.00211803	-0.756979	1.21431	0.83333	-0.907292	0.62338	0.908379	0.000349414	-0.74644	0.727505	0.000111615	0.0104551	5	no differential activity	Oncogene	TRUE
PBX1	SMARCA4	SMARCA4 missense	230	6895	-0.151175	0.0140251	-0.1652	0.68665	0.659452	-0.250173	0.240588	0.250511	0.000349596	-0.158346	0.0125174	0.0087808	0.0076474	2	deactivated in tumors	TSG	TRUE
PBX1	FBXW7	FBXW7 p.465	53	6806	-0.309398	0.014618	-0.324016	0.673193	0.656392	-0.493535	0.481313	0.493632	0.00035009	-0.323901	0.0438582	0.00144342	0.0370684	4	deactivated in tumors	TSG	TRUE
MYCN	TRIO	TRIO truncating	45	6905	0.397897	0.00962049	0.388276	0.7695	0.757677	0.512405	0.504582	0.512456	0.000350296	0.405461	0.0482159	0.000958334	0.0101047	3	activated in tumors	Oncogene	TRUE
CREB1	SMO	SMO missense	77	7077	0.358995	0.010892	0.348103	0.897838	0.860219	0.404476	0.387712	0.404668	0.000350652	0.352586	0.0123098	0.139307	0.0394484	4	activated in tumors	Oncogene	TRUE
E2F4	CSF1R	CSF1R missense	88	7061	0.273504	0.0105041	0.263	0.71108	0.689462	0.381308	0.369859	0.381456	0.000351269	0.264322	0.000906352	0.000127468	0.0223179	3	activated in tumors	Oncogene	TRUE
VDR	AXIN2	AXIN2 p.G665fs	24	7041	-0.525802	0.00539363	-0.531196	0.683496	0.722895	-0.734945	0.777175	0.734818	0.000352009	-0.528788	0.620878	0.017252	0.00715844	3	deactivated in tumors	TSG	TRUE
E2F7	PIK3CA	PIK3CA activitygain	599	6014	-0.0842815	0.0230803	-0.107362	0.688955	0.617154	-0.172057	0.155833	0.173963	0.000352655	-0.0966983	0.0170897	0.0582259	0.0115903	3	activated in tumors	Oncogene	TRUE
NR1I2	MSH6	MSH6 truncating	61	7000	0.348185	-0.00313051	0.351316	0.748853	0.766165	0.458625	0.469139	0.458538	0.000352915	0.35254	0.825149	0.842566	0.00315102	5	deactivated in tumors	TSG	TRUE
[truncated: 130,755 more rows]

## Sheet: table S5B
Table S5B. Functional characterization of driver mutations. Full list of ANOVA pan-cancer interactions between mutation classes in driver genes and TF activities in cell lines
[truncated: 38,806 more rows]
